# Supplementary material for: Characterization of gene expression patterns in response to an orthotospovirus infection between two diploid peanut species and their hybrid
Source: Front Plant Sci. 2023 Nov 13;14:1270531. doi: 10.3389/fpls.2023.1270531 (PMC10683084; doi:10.3389/fpls.2023.1270531)
Supplement: Supplementary file 2 [file Table_1.xlsx]

## Sheet: Table S1
	baseMean	log2FoldChange	lfcSE	stat	pvalue	padj
ArasteEVm001500t4	4415.88	29.5968	2.86992	10.3128	6.17051e-25	2.9906e-20
ArasteEVm001584t4	226.707	11.7017	2.70977	4.31835	1.57199e-05	0.00107606
ArasteEVm001500t7	199.797	11.5195	2.71831	4.23776	2.25765e-05	0.00141186
ArasteEVm008640t2	196.124	11.4927	2.65496	4.32878	1.49935e-05	0.00103959
ArasteEVm000145t2	173.654	11.3171	1.65505	6.83794	8.03398e-12	6.91256e-09
ArasteEVm010383t5	172.182	11.3048	1.93141	5.85314	4.82376e-09	1.31342e-06
ArasteEVm038723t1	442.579	11.1012	1.7282	6.42355	1.33129e-10	6.03014e-08
ArasteEVm002547t3	144.446	11.0515	2.63666	4.19147	2.77149e-05	0.0016341
ArasteEVm000201t13	131.828	10.9196	2.6325	4.14801	3.35377e-05	0.00186096
ArasteEVm001139t3	129.295	10.8917	2.63742	4.12967	3.63281e-05	0.00197164
ArasteEVm000122t3	125.147	10.8445	2.71447	3.99509	6.46701e-05	0.00310327
ArasteEVm004912t4	118.545	10.7664	2.6266	4.099	4.1494e-05	0.00219307
ArasteEVm003765t2	117.129	10.749	1.64033	6.55296	5.64079e-11	2.7068e-08
ArasteEVm015925t1	109.582	10.653	2.62034	4.0655	4.793e-05	0.00244781
ArasteEVm033813t1	107.908	10.6308	2.62807	4.0451	5.2301e-05	0.00262404
ArasteEVm008640t6	107.274	10.6223	2.64009	4.02348	5.73443e-05	0.00282157
ArasteEVm009932t8	107.188	10.621	2.66049	3.99214	6.5479e-05	0.00311376
ArasteEVm007970t1	103.731	10.5737	2.64806	3.99301	6.52395e-05	0.00311376
ArasteEVm012575t2	99.953	10.5203	2.62465	4.00829	6.11594e-05	0.00296984
ArasteEVm021451t6	96.2329	10.4655	2.68393	3.89931	9.64686e-05	0.00410127
ArasteEVm001770t2	96.0576	10.4628	1.90988	5.47827	4.29493e-08	8.74615e-06
ArasteEVm012145t3	95.3507	10.4521	2.03775	5.12926	2.90886e-07	4.48983e-05
ArasteEVm012370t3	94.2607	10.4356	1.77963	5.8639	4.52112e-09	1.25567e-06
ArasteEVm011773t1	86.2719	10.3079	2.62334	3.9293	8.51938e-05	0.00374343
ArasteEVm028481t1	84.4743	10.2776	1.62888	6.3096	2.79763e-10	1.19991e-07
ArasteEVm010964t1	80.4114	10.2063	2.62438	3.88905	0.000100637	0.00423761
ArasteEVm010450t2	76.4314	10.1331	2.75305	3.68067	0.000232621	0.00761255
ArasteEVm002210t5	73.9592	10.0857	1.8648	5.40849	6.35597e-08	1.24716e-05
ArasteEVm012982t3	73.3811	10.0745	2.61001	3.85993	0.00011342	0.00460832
ArasteEVm020580t1	69.5879	9.99778	2.15395	4.6416	3.45715e-06	0.000329832
ArasteEVm001104t4	69.3364	9.99256	2.63715	3.78915	0.000151166	0.00562272
ArasteEVm019345t2	207.681	9.88125	1.64457	6.00842	1.87342e-09	6.01305e-07
ArasteEVm002074t2	60.2804	9.79057	2.64354	3.70359	0.000212571	0.00710944
ArasteEVm006201t3	60.0829	9.78574	2.0147	4.85718	1.1907e-06	0.00014041
ArasteEVm006332t2	59.0777	9.76152	2.61237	3.73665	0.00018649	0.00647674
ArasteEVm001863t1	56.1168	9.68738	2.73547	3.5414	0.000398009	0.0110544
ArasteEVm038723t2	56.0749	9.68622	1.96693	4.92453	8.45649e-07	0.000105876
ArasteEVm019229t1	55.7556	9.6782	2.59014	3.73656	0.000186554	0.00647674
ArasteEVm021866t1	55.349	9.66766	2.59028	3.73229	0.00018975	0.00654084
ArasteEVm010189t3	54.8917	9.65533	1.89296	5.10065	3.38485e-07	5.04769e-05
ArasteEVm012977t1	54.1749	9.63688	2.64974	3.63691	0.000275923	0.0085163
ArasteEVm005067t3	53.9291	9.62987	1.72939	5.56836	2.57148e-08	5.61394e-06
ArasteEVm015962t1	53.5958	9.62105	2.66255	3.61347	0.00030213	0.00904448
ArasteEVm001755t2	51.9329	9.57563	2.67344	3.58176	0.000341285	0.0099165
ArasteEVm013181t1	51.6323	9.56732	2.58956	3.69458	0.000220252	0.00730645
ArasteEVm004141t2	51.5577	9.56525	2.58867	3.69505	0.000219844	0.00730291
ArasteEVm006984t6	51.0153	9.54985	1.85179	5.1571	2.50807e-07	4.03841e-05
ArasteEVm011579t1	50.1405	9.52514	2.59259	3.67399	0.000238791	0.00774647
ArasteEVm007136t2	50.0497	9.52233	2.60755	3.65182	0.000260385	0.00820144
ArasteEVm001891t2	49.6918	9.51195	2.0274	4.6917	2.70948e-06	0.000274994
ArasteEVm019145t2	48.3901	9.47379	2.58613	3.66331	0.000248977	0.00795498
ArasteEVm017048t1	48.2486	9.46962	2.58792	3.65916	0.00025304	0.00805771
ArasteEVm000003t4	500.785	9.46501	2.02794	4.66731	3.05176e-06	0.000298801
ArasteEVm007342t1	48.039	9.46324	2.58982	3.65401	0.000258178	0.00814974
ArasteEVm020665t1	47.8193	9.4567	2.58581	3.65715	0.000255038	0.00810005
ArasteEVm044289t1	46.9047	9.42876	2.58998	3.64047	0.000272136	0.00845472
ArasteEVm024060t1	46.5507	9.41791	2.58521	3.64299	0.000269485	0.00841006
ArasteEVm035286t1	46.2708	9.40919	2.58489	3.64008	0.000272552	0.0084568
ArasteEVm015322t1	45.6366	9.38931	2.58497	3.63228	0.000280932	0.00862295
ArasteEVm017297t1	44.9362	9.36659	1.87554	4.99409	5.91148e-07	7.87104e-05
ArasteEVm003061t5	44.6054	9.35611	2.61636	3.57601	0.000348882	0.0100768
ArasteEVm003849t2	44.4308	9.35049	2.71777	3.44051	0.000580629	0.0143722
ArasteEVm001694t2	44.1334	9.3407	2.62169	3.56286	0.000366839	0.010483
ArasteEVm032201t1	43.9093	9.3337	2.58948	3.60447	0.000312792	0.00930047
ArasteEVm021784t1	43.4983	9.32002	2.58474	3.60578	0.000311214	0.00927061
ArasteEVm001932t3	43.2592	9.31186	2.6044	3.57544	0.000349642	0.0100868
ArasteEVm020123t1	43.133	9.30792	2.58394	3.60221	0.00031552	0.00935862
ArasteEVm011633t1	43.1177	9.30733	2.58574	3.59949	0.000318843	0.00941111
ArasteEVm001356t4	42.9915	9.30325	2.59141	3.59004	0.000330629	0.00969405
ArasteEVm032403t2	42.991	9.30313	2.58334	3.6012	0.000316755	0.00938378
ArasteEVm007341t1	42.9617	9.30224	2.59069	3.59064	0.000329863	0.00967744
ArasteEVm013202t1	42.7972	9.29666	2.58483	3.59662	0.000322374	0.00949797
ArasteEVm020844t1	42.644	9.29142	2.58361	3.5963	0.000322777	0.00950408
ArasteEVm044749t1	42.0547	9.27141	2.58403	3.58796	0.000333273	0.00975977
ArasteEVm012169t3	41.9268	9.2668	2.61445	3.54445	0.000393434	0.0109665
ArasteEVm030991t1	41.0989	9.2381	2.59177	3.5644	0.000364685	0.0104338
ArasteEVm015575t4	40.6028	9.22084	2.58455	3.56768	0.000360154	0.0103224
ArasteEVm043105t1	40.5624	9.21934	2.58918	3.56072	0.000369838	0.0105315
ArasteEVm001329t4	39.9586	9.19741	2.65561	3.46339	0.00053341	0.0135831
ArasteEVm036768t1	39.9463	9.19714	2.58252	3.56131	0.000369014	0.01052
ArasteEVm034810t1	39.7932	9.19159	2.58334	3.55803	0.000373648	0.0106088
ArasteEVm058670t1	39.6784	9.18763	2.60587	3.52574	0.000422305	0.01146
ArasteEVm004751t1	39.6782	9.18756	2.59132	3.54551	0.000391852	0.0109588
ArasteEVm023827t1	39.6056	9.18461	2.67812	3.42949	0.00060471	0.0146907
ArasteEVm003222t5	39.5585	9.18312	2.58264	3.55572	0.000376952	0.0106714
ArasteEVm002322t1	39.5358	9.18205	2.64376	3.47311	0.000514469	0.0132488
ArasteEVm013492t1	39.5066	9.18133	2.59467	3.53853	0.000402358	0.0111443
ArasteEVm010558t1	39.4266	9.17814	2.65837	3.45254	0.000555335	0.0139167
ArasteEVm039579t1	39.4089	9.17757	2.58397	3.55173	0.000382701	0.0107712
ArasteEVm003222t2	38.7898	9.15479	2.58174	3.54598	0.00039116	0.0109457
ArasteEVm008590t1	38.3274	9.13757	2.58733	3.53167	0.000412947	0.0113287
ArasteEVm026019t3	38.2716	9.13552	2.59534	3.51997	0.000431595	0.0116533
ArasteEVm023944t1	38.2267	9.13378	2.58822	3.52899	0.000417152	0.0113774
ArasteEVm004582t3	37.7441	9.11551	2.58033	3.53269	0.000411358	0.0113149
ArasteEVm033393t1	37.1688	9.0932	1.77663	5.11822	3.08438e-07	4.68613e-05
ArasteEVm019248t3	37.106	9.0905	2.64943	3.43111	0.000601122	0.014634
ArasteEVm006436t1	37.0479	9.08869	2.60835	3.48446	0.00049313	0.0128288
ArasteEVm006251t6	36.8305	9.07987	1.87527	4.84189	1.28611e-06	0.000149838
ArasteEVm001356t1	36.1373	9.05273	2.59213	3.4924	0.000478707	0.0125535
ArasteEVm021578t4	36.0035	9.04751	2.65169	3.41197	0.000644945	0.01533
ArasteEVm030447t1	35.9689	9.04586	2.58088	3.50496	0.000456684	0.012148
ArasteEVm003614t2	35.9168	9.04382	2.58204	3.50259	0.000460757	0.0122094
ArasteEVm020314t1	35.7265	9.03614	2.58151	3.50033	0.000464683	0.0122866
ArasteEVm020925t1	35.6964	9.03485	2.5821	3.49903	0.00046696	0.0123266
ArasteEVm039919t1	35.5623	9.0295	2.58166	3.49756	0.000469529	0.0123877
ArasteEVm004592t1	35.4543	9.02492	2.6649	3.38658	0.000707686	0.0163639
ArasteEVm020477t1	35.4322	9.02436	2.60463	3.46473	0.000530759	0.0135531
ArasteEVm015168t2	35.2478	9.01638	2.61117	3.45301	0.000554376	0.013907
ArasteEVm020456t5	35.1781	9.01351	2.60367	3.46184	0.000536496	0.0136244
ArasteEVm005694t1	35.0815	9.01	2.60091	3.46418	0.000531858	0.0135597
ArasteEVm036510t1	34.6964	8.99384	2.58317	3.4817	0.000498244	0.0129132
ArasteEVm005075t5	2255.31	8.99155	1.54698	5.81231	6.16164e-09	1.60554e-06
ArasteEVm007683t7	51.7283	8.9905	2.4647	3.64771	0.000264589	0.00827861
ArasteEVm022077t1	33.8166	8.95703	2.60106	3.4436	0.000574014	0.0142737
ArasteEVm017324t2	33.4391	8.94064	2.58059	3.46457	0.000531086	0.0135543
ArasteEVm017893t2	33.4156	8.93952	2.63271	3.39556	0.000684888	0.0159893
ArasteEVm003331t7	33.3801	8.93833	2.6122	3.42175	0.000622184	0.01493
ArasteEVm012973t3	33.1286	8.92695	2.65624	3.36075	0.000777321	0.0175063
ArasteEVm000568t1	33.11	8.92634	2.59306	3.4424	0.000576574	0.0143084
ArasteEVm014499t4	33.009	8.9218	2.68409	3.32396	0.000887498	0.0192368
ArasteEVm027267t1	32.9958	8.92161	2.60842	3.42031	0.000625494	0.0149702
ArasteEVm008154t1	32.9321	8.91874	2.58918	3.44462	0.000571867	0.0142455
ArasteEVm030999t1	32.8943	8.91693	2.58105	3.45476	0.000550779	0.013858
ArasteEVm015681t2	32.8799	8.9163	1.64461	5.42152	5.90934e-08	1.16899e-05
ArasteEVm022264t1	32.8459	8.91484	2.58053	3.45466	0.000550993	0.013858
ArasteEVm006762t1	32.7119	8.90904	2.58673	3.44413	0.000572891	0.0142608
ArasteEVm026019t1	32.3347	8.89219	2.58058	3.44581	0.000569341	0.0141943
ArasteEVm011337t1	32.2939	8.89048	2.58552	3.43857	0.000584794	0.0144164
ArasteEVm015464t1	32.2902	8.89033	2.58666	3.437	0.000588199	0.0144635
ArasteEVm015145t2	32.2601	8.88889	2.58056	3.44456	0.000571984	0.0142455
ArasteEVm011581t1	32.1895	8.88583	2.5878	3.43373	0.00059533	0.0145576
ArasteEVm023384t2	31.9323	8.87434	2.60373	3.40831	0.000653662	0.0154636
ArasteEVm023850t1	31.622	8.86003	2.58071	3.43317	0.000596568	0.0145779
ArasteEVm034298t1	31.5662	8.85755	2.58156	3.43109	0.000601171	0.014634
ArasteEVm025121t1	31.2826	8.84451	2.58075	3.42711	0.000610046	0.0147611
ArasteEVm035762t1	31.0214	8.83242	2.58086	3.42227	0.000621001	0.01493
ArasteEVm051810t1	30.7864	8.82147	2.5817	3.41692	0.00063333	0.0150966
ArasteEVm020810t2	30.7605	8.82033	2.58844	3.40758	0.000655411	0.0154876
ArasteEVm011862t2	30.4135	8.80372	2.62409	3.35496	0.000793753	0.0177612
ArasteEVm010197t1	30.2191	8.79458	2.58069	3.40784	0.000654786	0.0154804
ArasteEVm001186t9	30.1139	8.78927	2.62749	3.34513	0.000822448	0.018193
ArasteEVm032825t1	30.0136	8.78422	1.72996	5.07771	3.82015e-07	5.54334e-05
ArasteEVm017603t2	29.8787	8.77789	2.67704	3.27895	0.00104193	0.0215472
ArasteEVm020400t3	29.5592	8.76298	2.60975	3.35778	0.000785706	0.0176542
ArasteEVm062203t2	29.4874	8.75898	2.72549	3.21372	0.00131025	0.0250491
ArasteEVm011007t5	29.4468	8.75666	1.85998	4.70792	2.50253e-06	0.000257511
ArasteEVm036046t1	29.3134	8.75105	2.71812	3.21952	0.00128405	0.0247152
ArasteEVm010871t2	29.2682	8.7487	2.60925	3.35295	0.000799538	0.0178579
ArasteEVm010829t1	29.1408	8.74219	2.58104	3.38707	0.000706424	0.0163425
ArasteEVm048076t1	29.1228	8.74156	2.62682	3.32782	0.000875296	0.0190833
ArasteEVm001762t2	28.9443	8.73232	2.60638	3.35037	0.000807049	0.0179589
ArasteEVm014798t4	28.8016	8.72546	2.59488	3.36256	0.00077222	0.0174482
ArasteEVm022096t1	28.6636	8.71856	2.60027	3.35295	0.000799562	0.0178579
ArasteEVm008623t1	28.6518	8.71767	2.5846	3.37292	0.000743742	0.0169914
ArasteEVm023429t1	28.5471	8.7123	2.59543	3.35678	0.000788559	0.0176863
ArasteEVm003071t1	28.355	8.70266	1.77584	4.90058	9.55557e-07	0.000116362
ArasteEVm010646t1	28.2452	8.69711	2.58174	3.3687	0.000755237	0.0172008
ArasteEVm002925t1	28.2114	8.69511	2.6471	3.28477	0.00102066	0.0212124
ArasteEVm042004t2	28.1931	8.69452	2.5818	3.36762	0.000758201	0.0172278
ArasteEVm011867t1	28.1672	8.69328	2.58815	3.35888	0.000782591	0.0175923
ArasteEVm028465t4	28.1122	8.69007	2.74115	3.17023	0.00152319	0.0278157
ArasteEVm014071t1	28.0785	8.68843	2.64971	3.27901	0.00104171	0.0215472
ArasteEVm011831t3	27.9372	8.68078	2.03425	4.26732	1.97833e-05	0.00127842
ArasteEVm004391t2	27.6562	8.66696	2.60247	3.33028	0.000867587	0.0189408
ArasteEVm034047t1	27.5587	8.66163	2.58174	3.35496	0.000793768	0.0177612
ArasteEVm030809t1	27.3987	8.65346	2.60115	3.32679	0.000878527	0.0191107
ArasteEVm033652t1	27.406	8.65343	2.67878	3.23037	0.00123632	0.0241249
ArasteEVm048190t1	27.3541	8.65115	2.61201	3.31206	0.000926112	0.0198518
ArasteEVm010039t1	27.357	8.65093	2.58715	3.3438	0.000826378	0.0182549
ArasteEVm028921t1	27.2568	8.6459	2.58936	3.339	0.000840795	0.0184975
ArasteEVm005634t1	27.2492	8.6454	2.5825	3.34769	0.000814885	0.0180738
ArasteEVm030555t1	27.1741	8.6412	2.59271	3.33288	0.000859526	0.0187986
ArasteEVm017035t1	27.0887	8.63687	2.58236	3.34457	0.000824103	0.0182129
ArasteEVm014344t1	27.0276	8.63323	2.61903	3.29635	0.000979512	0.0206315
ArasteEVm005438t1	26.9954	8.63187	2.58206	3.34302	0.000828708	0.018298
ArasteEVm058268t1	26.9882	8.63165	2.59406	3.32747	0.000876399	0.0190987
ArasteEVm002843t4	26.9744	8.63042	2.64665	3.26088	0.00111067	0.022627
ArasteEVm020031t1	26.6784	8.61494	2.58742	3.32955	0.000869872	0.0189821
ArasteEVm009634t1	26.5745	8.60956	2.67391	3.21984	0.00128263	0.0246976
ArasteEVm002364t1	26.5827	8.60931	2.65135	3.24714	0.00116572	0.0233849
ArasteEVm004708t1	26.5404	8.60749	2.59098	3.3221	0.000893438	0.0193223
ArasteEVm005963t2	26.2149	8.58985	1.70637	5.03399	4.8038e-07	6.65203e-05
ArasteEVm026987t1	25.9959	8.57768	2.60987	3.28664	0.00101392	0.0211175
ArasteEVm035320t1	154.321	8.57717	2.56059	3.34968	0.000809041	0.0179949
ArasteEVm012155t6	25.9906	8.57678	2.6241	3.26847	0.00108132	0.0221409
ArasteEVm027403t1	25.9544	8.57515	2.58286	3.32002	0.000900097	0.0194144
ArasteEVm016274t2	25.7766	8.56492	2.73685	3.12948	0.00175118	0.0304312
ArasteEVm004147t2	25.7535	8.56394	2.58224	3.31648	0.000911605	0.0196276
ArasteEVm026892t2	25.611	8.55588	2.58318	3.31215	0.000925804	0.0198518
ArasteEVm018698t3	25.6108	8.55545	2.09127	4.09104	4.2945e-05	0.00225745
ArasteEVm030497t1	25.5626	8.55322	2.58336	3.31089	0.000929984	0.0199172
ArasteEVm027260t1	25.5369	8.55202	2.61587	3.26928	0.0010782	0.0220863
ArasteEVm000334t7	25.5289	8.55114	2.62285	3.26025	0.00111314	0.0226556
ArasteEVm000306t4	25.4897	8.54895	2.60938	3.27624	0.00105198	0.0217142
ArasteEVm016309t1	25.4283	8.54515	2.6061	3.27891	0.0010421	0.0215472
ArasteEVm022741t1	25.3279	8.54009	2.59938	3.28544	0.00101824	0.021187
ArasteEVm029236t1	25.3207	8.53983	2.652	3.22015	0.00128125	0.0246906
ArasteEVm010660t3	25.1079	8.52698	2.69076	3.16899	0.0015297	0.0279031
ArasteEVm035294t3	24.8055	8.51004	2.60261	3.26981	0.00107619	0.0220823
ArasteEVm035753t1	24.7789	8.50816	2.58628	3.28973	0.00100282	0.0210073
ArasteEVm004391t3	24.7344	8.50578	2.58778	3.28691	0.00101294	0.0211107
ArasteEVm047687t1	24.6749	8.50243	2.60349	3.26579	0.00109161	0.0223044
ArasteEVm007292t1	24.6263	8.49951	2.59253	3.27846	0.00104375	0.0215719
ArasteEVm019243t2	24.5332	8.49418	2.61581	3.24724	0.0011653	0.0233849
ArasteEVm003151t2	24.4863	8.49108	2.59491	3.27221	0.00106711	0.0219612
ArasteEVm023063t1	24.4133	8.48676	2.58491	3.28319	0.00102638	0.0212856
ArasteEVm016011t2	24.1935	8.47399	2.59999	3.25925	0.00111709	0.0226815
ArasteEVm029919t1	24.1595	8.47165	2.58651	3.27532	0.00105544	0.0217671
ArasteEVm054978t1	24.1373	8.47044	2.58439	3.27754	0.00104716	0.0216333
ArasteEVm028630t1	24.1338	8.4704	2.59648	3.26227	0.00110525	0.0225356
ArasteEVm051350t1	24.0847	8.46722	2.16875	3.90419	9.45414e-05	0.00404774
ArasteEVm006254t1	23.8761	8.45475	2.58478	3.27098	0.00107177	0.0220197
ArasteEVm010921t1	23.7048	8.44457	2.60242	3.24489	0.00117494	0.0234898
ArasteEVm044758t1	23.6668	8.44178	2.60099	3.24561	0.00117201	0.0234625
ArasteEVm010675t2	23.586	8.43671	2.63141	3.20616	0.00134521	0.0255373
ArasteEVm011484t1	23.4325	8.42796	2.61578	3.22197	0.00127312	0.024583
ArasteEVm059877t1	23.4093	8.42599	2.60376	3.23608	0.00121182	0.0238748
ArasteEVm031790t1	23.4058	8.42596	2.58614	3.25813	0.0011215	0.0227249
ArasteEVm010903t1	23.2641	8.41726	2.58531	3.2558	0.00113072	0.0228817
ArasteEVm047265t1	23.2155	8.41416	2.5874	3.25197	0.00114607	0.0230996
ArasteEVm008631t1	23.1935	8.41308	2.59739	3.23906	0.00119926	0.0237335
ArasteEVm026185t3	23.0368	8.40327	2.59428	3.23915	0.00119886	0.0237335
ArasteEVm033402t1	22.977	8.3995	2.59176	3.24085	0.00119175	0.0236718
ArasteEVm033220t1	22.9099	8.39529	2.59293	3.23776	0.00120471	0.0238121
ArasteEVm018669t1	22.8872	8.39363	2.58712	3.24439	0.00117703	0.0234898
ArasteEVm004638t2	22.7415	8.38432	2.5933	3.23307	0.00122468	0.0240327
ArasteEVm018908t2	22.6584	8.37892	1.79035	4.68005	2.86802e-06	0.000287193
ArasteEVm032122t2	22.5932	8.37548	2.67928	3.12602	0.00177187	0.0306151
ArasteEVm020400t1	22.5705	8.37384	2.60345	3.21644	0.00129793	0.0249033
ArasteEVm001569t4	22.3984	8.36249	2.58762	3.23173	0.00123045	0.0240955
ArasteEVm012568t1	22.3759	8.36098	2.59045	3.22762	0.00124826	0.0242868
ArasteEVm039605t1	22.3276	8.35795	2.58691	3.23086	0.00123418	0.0241169
ArasteEVm026957t1	22.29	8.35537	2.59623	3.21827	0.00128968	0.024794
ArasteEVm028143t1	22.216	8.35099	2.60217	3.20925	0.00133083	0.025314
ArasteEVm005010t4	22.2113	8.34998	2.67778	3.11825	0.00181926	0.0311562
ArasteEVm015687t1	22.1298	8.34514	2.58704	3.22575	0.00125645	0.0243873
ArasteEVm024321t1	22.0627	8.34077	2.58709	3.22399	0.00126417	0.0244685
ArasteEVm009263t1	21.9768	8.33507	2.5885	3.22003	0.00128176	0.0246906
ArasteEVm036284t1	21.8161	8.32427	2.60828	3.19148	0.00141547	0.0265283
ArasteEVm037543t1	21.7459	8.32024	2.62012	3.17551	0.00149571	0.0274483
ArasteEVm046181t1	21.604	8.31068	2.59996	3.19647	0.00139121	0.0261748
ArasteEVm022052t1	21.5781	8.30909	2.62925	3.16025	0.00157635	0.0284966
ArasteEVm037090t1	21.5439	8.30624	2.64684	3.13818	0.00170003	0.0298635
ArasteEVm027540t1	21.3653	8.29472	2.61077	3.17712	0.00148747	0.0273489
ArasteEVm035051t2	21.3428	8.29315	2.6017	3.18759	0.00143465	0.0267122
ArasteEVm024786t1	21.2458	8.28657	2.60166	3.18511	0.00144701	0.0268598
ArasteEVm008506t6	21.2174	8.28389	2.01062	4.12007	3.78765e-05	0.00204196
ArasteEVm025544t2	20.8728	8.26112	2.61928	3.15397	0.00161065	0.028944
ArasteEVm058703t1	20.8054	8.25627	2.59422	3.18257	0.00145974	0.0269824
ArasteEVm019146t2	20.5136	8.23538	2.71093	3.03784	0.00238281	0.0373191
ArasteEVm004401t7	20.443	8.23029	2.61341	3.14925	0.00163692	0.0292426
ArasteEVm029115t2	20.4139	8.22909	2.62804	3.13127	0.00174054	0.0302877
ArasteEVm033594t1	20.4097	8.22839	2.5905	3.17638	0.00149127	0.0274084
ArasteEVm056149t1	20.3542	8.22484	2.62055	3.13859	0.00169762	0.0298429
ArasteEVm015412t6	20.3406	8.22423	1.79901	4.57154	4.84145e-06	0.000427406
ArasteEVm049697t2	20.3171	8.22238	2.74579	2.99455	0.00274854	0.0409375
ArasteEVm048163t1	20.0853	8.20551	2.59906	3.15711	0.0015934	0.0287192
ArasteEVm056380t1	20.0912	8.20538	2.76413	2.96852	0.00299235	0.0433018
ArasteEVm044362t1	19.9881	8.19827	2.59156	3.16345	0.00155914	0.0283121
ArasteEVm019110t1	19.9661	8.19707	2.62029	3.12831	0.00175816	0.0305088
ArasteEVm027514t1	19.8688	8.1898	2.59442	3.1567	0.00159565	0.0287383
ArasteEVm007965t1	19.839	8.18761	2.59364	3.1568	0.0015951	0.0287383
ArasteEVm022240t1	19.779	8.18297	2.59802	3.14969	0.00163443	0.0292407
ArasteEVm002210t3	400.75	8.18089	2.13323	3.83499	0.000125572	0.00496461
ArasteEVm005950t1	19.7234	8.17932	2.6034	3.14178	0.00167922	0.0296758
ArasteEVm029236t2	19.6938	8.17735	2.64389	3.09292	0.00198195	0.0330707
ArasteEVm010240t1	19.5292	8.1648	2.59243	3.14948	0.00163561	0.0292407
ArasteEVm057439t1	138.187	8.16406	2.28528	3.57245	0.000353655	0.0101666
ArasteEVm036524t1	19.4842	8.16132	2.59775	3.14169	0.00167977	0.0296758
ArasteEVm032323t1	19.4583	8.1596	2.59281	3.14701	0.00164951	0.0293269
ArasteEVm027501t1	19.4173	8.15662	2.59458	3.14371	0.00166821	0.0295617
ArasteEVm008695t1	19.3616	8.15264	2.60872	3.12515	0.00177714	0.0306931
ArasteEVm008957t2	19.3528	8.15126	2.63813	3.08979	0.00200301	0.0332652
ArasteEVm028616t1	19.3425	8.15088	2.59397	3.14224	0.0016766	0.0296758
ArasteEVm014040t1	19.1749	8.13861	2.60268	3.12702	0.00176588	0.0305553
ArasteEVm031957t1	19.1673	8.13785	2.59349	3.1378	0.00170221	0.0298892
ArasteEVm010505t1	19.1226	8.13458	2.59622	3.13324	0.0017289	0.0301738
ArasteEVm026185t2	19.0816	8.13155	2.60035	3.1271	0.00176542	0.0305553
ArasteEVm021879t1	19.0303	8.12704	2.65669	3.05908	0.00222015	0.0356415
ArasteEVm025556t2	19.0103	8.12568	2.60906	3.11442	0.0018431	0.0314312
ArasteEVm048225t1	18.9497	8.12145	1.70907	4.75197	2.01447e-06	0.000216003
ArasteEVm006582t2	18.9505	8.1211	2.61482	3.10579	0.00189771	0.0321003
ArasteEVm025456t4	18.9288	8.12012	2.6233	3.09538	0.00196558	0.0328836
ArasteEVm010550t1	18.8876	8.1168	2.60052	3.12122	0.001801	0.030964
ArasteEVm003909t7	18.8496	8.11318	2.67715	3.03053	0.00244123	0.037922
ArasteEVm010154t1	18.835	8.11242	2.60028	3.11982	0.00180959	0.0310675
ArasteEVm015173t3	18.7772	8.10777	2.72125	2.97942	0.00288791	0.0422919
ArasteEVm018584t1	18.7123	8.10346	2.61122	3.10333	0.00191359	0.0322476
ArasteEVm004627t1	18.6936	8.1019	2.60071	3.11527	0.00183779	0.0313789
ArasteEVm000990t7	18.6231	8.09597	1.89122	4.28082	1.8621e-05	0.00122787
ArasteEVm012348t1	18.5891	8.09388	2.60575	3.10616	0.00189537	0.0320868
ArasteEVm025062t1	18.5445	8.0905	2.61821	3.09008	0.002001	0.0332652
ArasteEVm036255t1	18.5106	8.08762	2.59652	3.11479	0.00184078	0.0314028
ArasteEVm005421t1	18.2833	8.07006	2.62146	3.07846	0.00208077	0.0341158
ArasteEVm048720t1	27.189	8.057	1.74765	4.61019	4.02307e-06	0.000368586
ArasteEVm021176t1	18.0892	8.05467	2.62148	3.07257	0.00212227	0.0346206
ArasteEVm026185t1	18.0443	8.05092	2.6029	3.09306	0.00198103	0.0330707
ArasteEVm007446t1	17.9883	8.04635	2.59904	3.09589	0.0019622	0.0328647
ArasteEVm007644t2	26.9386	8.04426	1.87056	4.30045	1.70452e-05	0.0011442
ArasteEVm050720t1	17.9362	8.04234	2.61155	3.07952	0.00207332	0.0340514
ArasteEVm020129t1	17.9251	8.04154	2.62501	3.06343	0.00218814	0.0353828
ArasteEVm019313t2	17.91	8.04018	2.60633	3.08487	0.00203641	0.0335932
ArasteEVm010924t2	17.8794	8.03702	1.83242	4.38602	1.15442e-05	0.000842625
ArasteEVm036296t2	17.8355	8.03425	2.61546	3.07183	0.00212753	0.0346831
ArasteEVm043938t1	17.7794	8.02963	2.6074	3.07955	0.0020731	0.0340514
ArasteEVm005439t2	17.6726	8.0201	1.80361	4.44669	8.7205e-06	0.000685005
ArasteEVm013368t3	17.5708	8.01296	2.72386	2.94176	0.00326351	0.0457984
ArasteEVm016260t3	17.5818	8.01283	1.93393	4.14328	3.42375e-05	0.00189424
ArasteEVm010861t1	17.5518	8.01105	2.60863	3.07099	0.00213353	0.0347459
ArasteEVm008891t2	17.5032	8.00725	2.61486	3.06221	0.00219709	0.0354239
ArasteEVm049112t1	17.4733	8.00442	2.59964	3.07905	0.00207664	0.0340716
ArasteEVm027112t1	17.4662	8.00418	2.63534	3.03725	0.00238748	0.0373505
ArasteEVm027834t1	17.3018	7.99027	2.60347	3.06908	0.00214717	0.034886
ArasteEVm035557t1	17.2719	7.98775	2.60243	3.06934	0.0021453	0.0348789
ArasteEVm018550t1	17.1527	7.97796	2.62026	3.04472	0.00232894	0.0367071
ArasteEVm014404t1	17.1485	7.97703	2.60964	3.05675	0.0022375	0.0358014
ArasteEVm041218t1	17.1265	7.9757	2.61346	3.05177	0.00227493	0.0362091
ArasteEVm016260t1	17.0342	7.96706	2.14432	3.71543	0.000202855	0.00687042
ArasteEVm027536t1	17.0107	7.96579	2.60411	3.05893	0.00222125	0.0356458
ArasteEVm012155t2	72.6241	7.95473	2.57477	3.08949	0.00200502	0.0332678
ArasteEVm039601t5	16.8468	7.95214	2.64559	3.00581	0.00264871	0.0400039
ArasteEVm024993t1	16.8206	7.94984	2.6333	3.01897	0.00253635	0.0389379
ArasteEVm022711t1	16.7308	7.94173	2.60196	3.05221	0.00227161	0.0361692
ArasteEVm017195t1	16.675	7.93715	2.61293	3.03764	0.00238435	0.0373256
ArasteEVm024533t1	16.6748	7.9368	2.6027	3.04945	0.00229258	0.0363706
ArasteEVm013236t1	16.6711	7.93652	2.60221	3.04992	0.00228905	0.0363385
ArasteEVm023593t1	16.6192	7.93253	2.64852	2.99508	0.0027437	0.0409031
ArasteEVm034842t1	2889.28	7.9315	1.75252	4.52576	6.01782e-06	0.00050373
ArasteEVm007917t2	16.6034	7.93005	2.70595	2.93059	0.00338315	0.0470495
ArasteEVm006667t1	16.5854	7.9293	2.60767	3.04076	0.0023598	0.037049
ArasteEVm038420t1	16.5817	7.92901	2.61011	3.0378	0.00238308	0.0373191
ArasteEVm015081t1	16.5632	7.92758	2.63136	3.01274	0.00258904	0.0394928
ArasteEVm016199t2	16.5256	7.92404	2.60535	3.04145	0.00235442	0.0369884
ArasteEVm016546t2	16.5261	7.92366	1.71683	4.6153	3.92534e-06	0.000363064
ArasteEVm047573t1	16.5108	7.9229	2.61548	3.02924	0.00245172	0.0380119
ArasteEVm001633t1	16.4646	7.91844	2.62368	3.01806	0.00254397	0.0390177
ArasteEVm046194t1	16.4583	7.91783	2.60781	3.03619	0.00239585	0.037421
ArasteEVm019665t1	16.4321	7.91547	2.61229	3.03009	0.00244484	0.037939
ArasteEVm046776t1	16.4141	7.91333	2.04483	3.86993	0.000108867	0.00448289
ArasteEVm056932t2	16.4029	7.91265	2.67259	2.96067	0.00306973	0.0440822
ArasteEVm011346t1	16.3837	7.91138	2.60432	3.03779	0.00238317	0.0373191
ArasteEVm027965t3	16.3728	7.91087	2.62587	3.01267	0.00258961	0.0394928
ArasteEVm011073t1	16.358	7.9097	2.65482	2.97938	0.00288834	0.0422919
ArasteEVm041635t2	16.3277	7.90634	2.60814	3.03141	0.00243414	0.0378483
ArasteEVm005531t4	24.4513	7.90083	2.34802	3.3649	0.00076572	0.0173418
ArasteEVm007456t1	16.2536	7.90053	2.67858	2.94952	0.00318266	0.0450368
ArasteEVm029768t2	16.2605	7.90042	2.60737	3.03004	0.00244524	0.037939
ArasteEVm004515t3	16.0739	7.88436	2.61483	3.01525	0.00256763	0.0392445
ArasteEVm031930t2	16.0779	7.88434	2.60537	3.02619	0.00247654	0.0382987
ArasteEVm051236t1	15.9808	7.87561	2.60576	3.02238	0.00250792	0.0386728
ArasteEVm015013t1	15.8653	7.86534	2.61553	3.00717	0.00263694	0.0398758
ArasteEVm014554t2	15.8344	7.86125	1.99737	3.9358	8.292e-05	0.00367014
ArasteEVm024672t1	15.7982	7.85925	2.61796	3.00206	0.00268163	0.0403001
ArasteEVm034029t1	15.7178	7.85213	2.6325	2.98277	0.00285651	0.0420001
ArasteEVm018658t1	15.6602	7.84668	2.62855	2.98517	0.00283419	0.0417641
ArasteEVm011286t1	15.5854	7.83953	2.6094	3.00435	0.00266152	0.0401378
ArasteEVm034796t2	15.5483	7.8365	2.6587	2.9475	0.0032036	0.0452011
ArasteEVm016092t1	15.5476	7.83534	2.66153	2.94392	0.00324082	0.045573
ArasteEVm047148t1	15.3839	7.82084	2.61396	2.99195	0.00277201	0.0411606
ArasteEVm044823t1	15.3501	7.81729	2.61208	2.99274	0.00276481	0.0411167
ArasteEVm033178t1	15.2753	7.80997	2.63674	2.96198	0.00305671	0.0439474
ArasteEVm053674t1	15.2457	7.80684	2.00738	3.88906	0.000100633	0.00423761
ArasteEVm027108t1	15.2235	7.80569	2.61371	2.98644	0.00282242	0.0416539
ArasteEVm018351t1	15.2047	7.80375	2.60942	2.9906	0.00278426	0.0413046
ArasteEVm020922t1	15.1748	7.80088	2.60956	2.98935	0.00279576	0.0413864
ArasteEVm002293t6	15.0517	7.78904	2.6114	2.9827	0.00285715	0.0420001
ArasteEVm007711t1	15.0183	7.78625	2.6236	2.96778	0.00299963	0.0433582
ArasteEVm014311t1	14.9729	7.7808	2.11293	3.68247	0.000230984	0.00757435
ArasteEVm024382t1	14.906	7.7748	2.62347	2.96355	0.00304109	0.0437897
ArasteEVm035561t1	14.8357	7.76884	2.66305	2.91727	0.00353105	0.048563
ArasteEVm030396t1	14.8305	7.76689	1.97478	3.93304	8.38793e-05	0.00370583
ArasteEVm034786t3	14.8167	7.76643	2.61165	2.97377	0.00294167	0.0427952
ArasteEVm017249t1	14.787	7.76392	2.63027	2.95176	0.00315969	0.0449347
ArasteEVm038692t1	14.7273	7.75802	2.62439	2.95612	0.00311537	0.0445307
ArasteEVm036710t1	14.6599	7.75101	2.61331	2.96597	0.00301729	0.0435615
ArasteEVm022160t1	14.5887	7.74336	2.63571	2.93786	0.00330486	0.0462528
ArasteEVm028444t1	14.5407	7.73952	2.61857	2.95562	0.00312036	0.0445307
ArasteEVm045073t2	14.5071	7.7362	2.61957	2.95323	0.00314469	0.0447608
ArasteEVm020124t6	14.4511	7.7305	2.61525	2.95593	0.0031173	0.0445307
ArasteEVm005467t8	14.4526	7.7298	1.93613	3.9924	6.5408e-05	0.00311376
ArasteEVm031846t1	14.4366	7.72842	2.2503	3.43439	0.00059388	0.0145353
ArasteEVm026167t2	14.4199	7.72658	2.63667	2.93043	0.00338499	0.047052
ArasteEVm038125t1	14.3973	7.72439	2.6516	2.91311	0.00357853	0.0489796
ArasteEVm006480t6	14.2964	7.71501	2.61038	2.95551	0.00312155	0.0445307
ArasteEVm038986t1	14.2973	7.71433	2.6478	2.91348	0.00357425	0.0489625
ArasteEVm027254t1	14.2832	7.71372	2.61888	2.94543	0.00322508	0.0454254
ArasteEVm013597t1	14.1899	7.70421	2.61739	2.94347	0.00324553	0.0456069
ArasteEVm006886t3	83.9823	7.69403	2.56139	3.00386	0.00266582	0.0401621
ArasteEVm005612t2	14.0371	7.68891	2.64187	2.9104	0.00360966	0.0492527
ArasteEVm039342t2	14.0387	7.68795	2.23009	3.44737	0.000566079	0.0141348
ArasteEVm024103t6	48.1256	7.68776	1.5995	4.80636	1.53705e-06	0.000173647
ArasteEVm012734t4	13.9181	7.67572	2.01286	3.81334	0.0001371	0.00528193
ArasteEVm059912t1	13.7122	7.65468	2.619	2.92275	0.0034695	0.0479615
ArasteEVm008205t1	603.885	7.65436	1.77615	4.30951	1.63613e-05	0.00111266
ArasteEVm023380t1	13.6303	7.64629	2.62608	2.91168	0.00359494	0.0491164
ArasteEVm021451t2	20.4101	7.64509	2.32397	3.28967	0.00100306	0.0210073
ArasteEVm014569t1	13.5182	7.63411	2.62052	2.9132	0.0035774	0.0489781
ArasteEVm001997t2	46.0559	7.62879	1.91941	3.97456	7.05104e-05	0.00327647
ArasteEVm015539t1	13.4473	7.62662	2.6215	2.90926	0.00362284	0.0493908
ArasteEVm019079t1	13.4535	7.62649	1.77074	4.30696	1.6551e-05	0.0011219
ArasteEVm033030t1	13.0985	7.58957	1.90612	3.98169	6.84259e-05	0.00319492
ArasteEVm028203t1	12.844	7.55955	2.08451	3.62654	0.000287247	0.00874734
ArasteEVm019248t1	59.3604	7.52532	2.43293	3.0931	0.00198075	0.0330707
ArasteEVm022252t1	38.3066	7.43052	2.43604	3.05025	0.00228654	0.0363269
ArasteEVm043525t1	17.5822	7.42438	2.37442	3.12682	0.00176708	0.0305651
ArasteEVm006489t2	24.6896	7.42019	2.42224	3.06335	0.0021887	0.0353828
ArasteEVm031366t1	11.5312	7.4053	2.03591	3.63733	0.000275474	0.00851476
ArasteEVm063895t1	55.0128	7.40297	2.14044	3.45861	0.000542968	0.013706
ArasteEVm028950t1	24.2783	7.37697	1.66956	4.41851	9.93834e-06	0.000758538
ArasteEVm004016t2	132.541	7.34681	1.96585	3.73722	0.000186068	0.00646937
ArasteEVm061388t1	60.0668	7.33284	2.48071	2.95595	0.0031171	0.0445307
ArasteEVm019729t1	10.8585	7.31806	1.92564	3.80033	0.000144503	0.00547029
ArasteEVm058041t1	10.7962	7.30873	2.16126	3.3817	0.000720399	0.0165945
ArasteEVm000334t14	15.7323	7.26393	2.31756	3.1343	0.00172267	0.0300976
ArasteEVm004342t2	87.1128	7.25847	2.09056	3.47203	0.000516545	0.0132811
ArasteEVm023498t1	15.2611	7.21816	2.37652	3.03728	0.00238724	0.0373505
ArasteEVm022250t1	145.611	7.19881	1.82051	3.95427	7.67683e-05	0.00346107
ArasteEVm024058t1	34.2247	7.16733	2.13608	3.35536	0.000792621	0.0177519
ArasteEVm013171t1	68.3425	7.13316	2.03997	3.4967	0.000471047	0.0124007
ArasteEVm021517t3	20.3863	7.12417	1.69575	4.20118	2.65528e-05	0.00158681
ArasteEVm009915t2	96.3311	7.11125	1.4045	5.06318	4.12318e-07	5.8431e-05
ArasteEVm021583t1	1550.73	7.09372	1.20989	5.86313	4.54219e-09	1.25567e-06
ArasteEVm047651t1	13.7799	7.06966	2.34139	3.01943	0.00253249	0.0389055
ArasteEVm030489t2	13.1421	6.99523	1.61582	4.3292	1.49649e-05	0.0010391
ArasteEVm002634t5	28.8328	6.99128	1.98241	3.52665	0.000420849	0.0114397
ArasteEVm012993t2	60.8111	6.96267	2.02715	3.43471	0.000593182	0.0145271
ArasteEVm063383t1	48.7027	6.91106	2.1018	3.28817	0.00100842	0.0210621
ArasteEVm001651t2	898.169	6.88711	2.27106	3.03255	0.00242497	0.0377663
ArasteEVm058969t1	457.451	6.88381	1.56888	4.38774	1.14536e-05	0.000841342
ArasteEVm008164t3	45.369	6.85116	1.78818	3.83137	0.000127432	0.00501308
ArasteEVm035070t1	11.2846	6.77829	1.68398	4.02516	5.69359e-05	0.00280718
ArasteEVm004489t4	17.3354	6.77657	2.00699	3.37648	0.000734191	0.0168402
ArasteEVm044751t1	209.26	6.75249	1.4186	4.75996	1.93632e-06	0.000209738
ArasteEVm012719t4	10.7103	6.70898	1.68822	3.97398	7.06802e-05	0.00327807
ArasteEVm021451t4	1389.94	6.69388	1.90434	3.51507	0.00043964	0.0118048
ArasteEVm012508t1	52.452	6.69005	2.22758	3.00328	0.0026709	0.0402012
ArasteEVm026431t1	129.154	6.68289	1.88645	3.54258	0.000396236	0.0110259
ArasteEVm015471t1	15.0121	6.57427	1.67983	3.91365	9.09126e-05	0.00392449
ArasteEVm016462t1	168.201	6.56919	2.12213	3.09557	0.00196436	0.0328836
ArasteEVm010964t2	458.613	6.56653	1.74057	3.77264	0.000161529	0.0058554
ArasteEVm009470t2	17.8868	6.56	1.72877	3.7946	0.000147881	0.00554741
ArasteEVm021451t10	1106.76	6.55043	2.03086	3.22544	0.00125779	0.0244035
ArasteEVm041249t1	14.7872	6.54548	1.89132	3.46079	0.000538588	0.0136523
ArasteEVm007249t1	241.672	6.50957	1.63347	3.98512	6.7446e-05	0.00317039
ArasteEVm007690t3	214.847	6.5093	2.22243	2.92892	0.00340146	0.047204
ArasteEVm012252t2	1320.76	6.4949	2.23326	2.90826	0.00363444	0.0495212
ArasteEVm032142t1	20.3924	6.46302	2.15596	2.99774	0.00271989	0.0406858
ArasteEVm054316t1	28.3531	6.45204	1.93282	3.33816	0.000843363	0.0185456
ArasteEVm031600t2	91.06	6.44767	2.15283	2.99497	0.00274473	0.0409055
ArasteEVm002567t4	69.0932	6.40968	1.76128	3.63922	0.00027346	0.00846952
ArasteEVm011405t2	113.289	6.3411	1.74149	3.6412	0.000271374	0.00844727
ArasteEVm021451t1	4948.49	6.33302	2.13264	2.96957	0.00298216	0.0432347
ArasteEVm018689t3	27.5161	6.33267	1.73593	3.648	0.000264285	0.00827823
ArasteEVm036567t1	39.5227	6.32895	2.10471	3.00704	0.00263805	0.0398802
ArasteEVm005343t6	19.735	6.2846	1.65119	3.80611	0.000141171	0.00539162
ArasteEVm021451t9	340.286	6.28342	2.15238	2.91929	0.00350827	0.0483265
ArasteEVm007243t1	281.261	6.26076	1.99537	3.13764	0.00170316	0.0298892
ArasteEVm002210t1	29.4686	6.25362	1.82304	3.43032	0.000602871	0.0146637
ArasteEVm032590t1	273.954	6.1687	1.24499	4.95481	7.23993e-07	9.3821e-05
ArasteEVm028971t4	2218.81	6.1613	1.80243	3.41833	0.000630062	0.0150352
ArasteEVm003855t4	3915.11	6.13432	1.51015	4.06208	4.86383e-05	0.00247877
ArasteEVm021451t5	736.46	6.13394	1.95003	3.14557	0.00165764	0.0294283
ArasteEVm007613t1	19.7065	6.07244	1.92822	3.14925	0.00163689	0.0292426
ArasteEVm041960t1	14.1786	5.97378	1.90956	3.12836	0.00175785	0.0305088
ArasteEVm017213t1	1041.68	5.97302	1.33321	4.48018	7.45797e-06	0.000603436
ArasteEVm029137t3	27.4512	5.96777	2.0296	2.94037	0.00327815	0.0459453
ArasteEVm002210t4	397.705	5.95832	1.72494	3.45421	0.00055191	0.0138667
ArasteEVm015863t3	24.3284	5.9549	1.83605	3.24333	0.00118141	0.0235209
ArasteEVm021451t8	1276.62	5.94948	1.80389	3.29814	0.000973262	0.0205355
ArasteEVm031600t1	702.68	5.85405	1.97265	2.96761	0.00300123	0.0433684
ArasteEVm022637t3	16.7469	5.81877	1.97064	2.95273	0.00314979	0.0448181
ArasteEVm024941t1	22.49	5.77108	1.71228	3.3704	0.000750596	0.0171273
ArasteEVm021451t11	511.195	5.76256	1.91681	3.00633	0.00264422	0.039961
ArasteEVm010310t2	772.385	5.69748	1.81587	3.13761	0.00170334	0.0298892
ArasteEVm042753t1	12.4038	5.68781	1.7719	3.21001	0.00132732	0.0252869
ArasteEVm020418t1	158.113	5.64727	1.85529	3.04387	0.00233553	0.0367871
ArasteEVm021332t1	33581.9	5.63503	1.14782	4.90933	9.13894e-07	0.000112418
ArasteEVm004233t1	32.2928	5.62914	1.90266	2.95857	0.00309074	0.0443148
ArasteEVm053660t1	12.0521	5.61029	1.80033	3.11625	0.00183168	0.0313136
ArasteEVm003564t3	520.834	5.60561	1.61991	3.46045	0.00053928	0.0136627
ArasteEVm034805t1	67.0571	5.56026	1.76307	3.15374	0.00161195	0.0289565
ArasteEVm033435t1	449.851	5.54798	1.71188	3.24087	0.00119165	0.0236718
ArasteEVm003747t1	494.413	5.53914	1.28207	4.32046	1.55705e-05	0.0010689
ArasteEVm007348t1	16.6777	5.48487	1.54	3.56161	0.000368585	0.01052
ArasteEVm012321t2	119.644	5.46703	1.47304	3.71141	0.000206112	0.00695158
ArasteEVm005075t6	1905.66	5.44244	1.30299	4.17689	2.95525e-05	0.00169703
ArasteEVm001334t2	17.828	5.40656	1.57664	3.42916	0.000605445	0.0147012
ArasteEVm034364t1	780.859	5.36148	1.25327	4.278	1.8858e-05	0.00123677
ArasteEVm012051t11	29.8243	5.34691	1.75446	3.0476	0.00230677	0.0365121
ArasteEVm039598t1	291.162	5.2947	1.25492	4.21914	2.45238e-05	0.00148944
ArasteEVm053097t1	192.311	5.25144	1.6028	3.27641	0.00105137	0.0217111
ArasteEVm006954t4	322.345	5.24962	1.74125	3.01486	0.00257098	0.0392705
ArasteEVm031390t2	59.8468	5.24722	1.66397	3.15343	0.00161363	0.0289761
ArasteEVm007243t3	409.698	5.23166	1.52011	3.44164	0.000578195	0.0143412
ArasteEVm054248t1	54.4008	5.2309	1.16816	4.4779	7.53826e-06	0.000607903
ArasteEVm007422t2	91.9186	5.18104	1.50671	3.43865	0.000584614	0.0144164
ArasteEVm016218t3	351.594	5.17992	1.36634	3.7911	0.00014998	0.00559149
ArasteEVm024312t1	362.47	5.15393	1.33515	3.86019	0.0001133	0.00460832
ArasteEVm024276t1	36.6803	5.13766	1.70682	3.01008	0.00261178	0.039706
ArasteEVm007699t1	37.5642	5.13364	1.68568	3.04543	0.00232345	0.0366802
ArasteEVm002567t3	39.6669	5.0931	1.61539	3.15286	0.00161678	0.0289896
ArasteEVm028919t1	110.545	5.09099	1.73593	2.93271	0.00336017	0.046824
ArasteEVm012288t1	379.548	5.06551	1.62779	3.11189	0.00185896	0.0316167
ArasteEVm016091t2	189.43	5.04719	1.23575	4.08432	4.42067e-05	0.00230085
ArasteEVm011741t1	59.8124	5.019	1.18356	4.24059	2.22936e-05	0.0014014
ArasteEVm003451t1	99.1154	4.98872	1.40249	3.55706	0.000375035	0.0106357
ArasteEVm029137t1	71.7178	4.98481	1.45434	3.42753	0.000609101	0.0147456
ArasteEVm021666t1	27.0904	4.9747	1.61287	3.08437	0.00203981	0.0336377
ArasteEVm016218t2	531.458	4.95725	1.16569	4.25261	2.11289e-05	0.00134387
ArasteEVm023661t1	208.529	4.94599	0.995371	4.96899	6.73019e-07	8.78235e-05
ArasteEVm045267t2	113.799	4.92144	1.21209	4.06029	4.9012e-05	0.00249257
ArasteEVm036041t1	84.5089	4.88862	1.34268	3.64094	0.000271647	0.00845034
ArasteEVm005188t3	88.3075	4.8856	1.65465	2.95265	0.00315056	0.0448181
ArasteEVm011124t3	433.588	4.85669	1.5505	3.13234	0.0017342	0.0302229
ArasteEVm012155t1	1563.21	4.83191	1.26567	3.81767	0.00013472	0.00522118
ArasteEVm004991t1	1781.85	4.81809	1.15813	4.16023	3.17923e-05	0.00178545
ArasteEVm007702t2	53.1532	4.78408	1.58613	3.01619	0.00255969	0.039166
ArasteEVm031047t1	81.8356	4.77447	1.34305	3.55493	0.000378077	0.0106913
ArasteEVm015222t1	44.0125	4.772	1.54656	3.08556	0.0020317	0.033541
ArasteEVm038708t3	14.4057	4.72921	1.6075	2.94197	0.00326128	0.0457984
ArasteEVm050793t2	15.0241	4.71034	1.57156	2.99725	0.00272429	0.0407266
ArasteEVm030309t1	165.055	4.68562	1.05312	4.44928	8.61567e-06	0.000680333
ArasteEVm033839t1	663.47	4.68176	1.01249	4.62398	3.76442e-06	0.000351589
ArasteEVm012731t1	65.5507	4.67074	1.54092	3.03113	0.00243642	0.0378716
ArasteEVm021697t1	52.5797	4.66986	1.36405	3.42354	0.000618122	0.0148836
ArasteEVm012234t1	222.815	4.66724	1.10594	4.22015	2.44137e-05	0.00148648
ArasteEVm044853t1	89.1911	4.65019	1.3963	3.33036	0.000867342	0.0189408
ArasteEVm060792t1	671.817	4.63749	1.307	3.54818	0.0003879	0.0108733
ArasteEVm015742t1	15.3046	4.62797	1.49072	3.10453	0.00190583	0.0321542
ArasteEVm010950t2	22.0086	4.62707	1.53375	3.01683	0.0025543	0.0391266
ArasteEVm007188t5	12.8137	4.61818	1.51279	3.05276	0.00226751	0.0361385
ArasteEVm005225t1	2708.51	4.60913	1.42671	3.23059	0.00123536	0.0241228
ArasteEVm003364t6	1346.39	4.58835	1.55125	2.95784	0.00309806	0.0443635
ArasteEVm009523t3	484.02	4.58394	1.15653	3.96353	7.38508e-05	0.00338298
ArasteEVm009494t1	8657.02	4.56168	1.18774	3.84065	0.000122709	0.00489079
ArasteEVm009349t1	193.701	4.54615	1.36222	3.33731	0.000845935	0.0185853
ArasteEVm013173t2	81.4081	4.54131	1.55782	2.91516	0.00355501	0.0487955
ArasteEVm030640t1	814.643	4.50543	1.26122	3.57229	0.000353878	0.0101666
ArasteEVm017138t1	327.594	4.50382	1.3614	3.30821	0.000938935	0.0200393
ArasteEVm019320t1	151.804	4.48687	1.39692	3.21198	0.00131823	0.0251435
ArasteEVm019248t2	969.132	4.47943	1.01969	4.39292	1.11837e-05	0.000830058
ArasteEVm029618t1	87.2731	4.45302	1.35658	3.28252	0.00102882	0.0213272
ArasteEVm006070t1	300.893	4.41511	1.17531	3.75654	0.000172282	0.00613958
ArasteEVm009797t1	71.0754	4.4084	1.3547	3.25416	0.00113726	0.0229948
ArasteEVm007189t1	97.9693	4.40522	1.47718	2.98219	0.00286199	0.0420458
ArasteEVm006279t1	572.726	4.38009	1.20402	3.63788	0.000274895	0.00850226
ArasteEVm010310t1	2094.52	4.36906	1.40861	3.10168	0.00192424	0.032382
ArasteEVm002259t3	1112.34	4.3517	1.43849	3.02518	0.00248486	0.0383905
ArasteEVm037555t1	65.9908	4.35167	1.33552	3.2584	0.00112041	0.0227249
ArasteEVm003695t1	286.162	4.33343	1.31213	3.30258	0.000957983	0.0203015
ArasteEVm010660t1	939.661	4.32645	1.3637	3.17259	0.00151087	0.0276115
ArasteEVm012051t7	272.315	4.32556	1.43307	3.01839	0.00254122	0.0389879
ArasteEVm023942t1	544.859	4.31282	1.02702	4.19935	2.67684e-05	0.00159381
ArasteEVm014835t4	151.617	4.30124	1.25193	3.43568	0.000591066	0.0144904
ArasteEVm027881t1	904.333	4.27952	0.934105	4.58141	4.61852e-06	0.000411472
ArasteEVm023631t1	6413.39	4.26178	1.19723	3.5597	0.000371285	0.0105541
ArasteEVm010094t3	114.396	4.24383	1.08232	3.92105	8.81656e-05	0.00384266
ArasteEVm019984t1	28.1605	4.24247	1.39946	3.03151	0.00243336	0.0378483
ArasteEVm010699t1	176.209	4.2003	1.29168	3.25181	0.00114673	0.0230996
ArasteEVm006785t4	22.1755	4.169	1.39928	2.97938	0.00288828	0.0422919
ArasteEVm011774t1	54.6058	4.14833	1.3558	3.0597	0.0022156	0.0356082
ArasteEVm008155t1	556.152	4.12581	1.30388	3.16425	0.00155484	0.0282659
ArasteEVm004450t1	1126.99	4.10891	1.32964	3.09024	0.00199998	0.0332652
ArasteEVm008704t1	2988.05	4.09597	1.22595	3.34107	0.000834571	0.0184061
ArasteEVm002085t1	159.764	4.08592	1.20074	3.40282	0.000666937	0.0156652
ArasteEVm010945t1	1035.13	4.05878	1.13285	3.58279	0.000339947	0.00989543
ArasteEVm000440t1	1835.85	4.04916	0.970729	4.17125	3.02932e-05	0.00172121
ArasteEVm007401t1	2222.22	4.04889	1.13907	3.55457	0.000378597	0.0106992
ArasteEVm012190t1	13.239	4.0488	1.22919	3.29387	0.000988168	0.0207864
ArasteEVm036043t1	326.255	3.99392	1.34769	2.96352	0.00304138	0.0437897
ArasteEVm021406t1	305.519	3.97155	1.23199	3.2237	0.00126548	0.0244841
ArasteEVm000872t3	2938.33	3.96073	1.13444	3.49134	0.000480602	0.0125839
ArasteEVm053631t1	46.5829	3.93498	1.24724	3.15494	0.00160531	0.0288587
ArasteEVm036795t2	25.5716	3.89142	1.19415	3.25873	0.00111911	0.0227131
ArasteEVm002634t1	1125.6	3.88128	0.968366	4.00808	6.12155e-05	0.00296984
ArasteEVm010712t2	501.495	3.85697	1.19448	3.229	0.00124224	0.0242181
ArasteEVm003024t6	669.215	3.83508	1.24305	3.08521	0.00203409	0.0335663
ArasteEVm007343t1	466.032	3.81013	0.987753	3.85737	0.000114612	0.00463283
ArasteEVm031418t1	409.302	3.79006	1.23267	3.07468	0.00210731	0.0344315
ArasteEVm013987t1	94.5094	3.78679	1.30117	2.91029	0.00361093	0.0492562
ArasteEVm036068t1	1169.9	3.76504	1.04986	3.58624	0.000335485	0.00980678
ArasteEVm017064t2	40.6899	3.75713	1.27536	2.94595	0.00321967	0.045375
ArasteEVm012551t1	326.359	3.7502	1.0728	3.4957	0.000472819	0.0124339
ArasteEVm013098t3	63.0756	3.7493	1.26504	2.96377	0.00303897	0.0437832
ArasteEVm058229t2	221.83	3.74227	1.03936	3.60055	0.000317539	0.00939389
ArasteEVm005792t2	1082.84	3.73611	1.12793	3.31235	0.000925141	0.0198518
ArasteEVm019040t1	2227.3	3.73536	1.20101	3.11019	0.00186967	0.0317726
ArasteEVm016474t1	842.684	3.703	0.81122	4.56473	5.00132e-06	0.000438325
ArasteEVm011134t2	361.796	3.69631	1.2639	2.92453	0.00344979	0.0477434
ArasteEVm015210t1	809.785	3.68789	1.19355	3.08985	0.00200256	0.0332652
ArasteEVm049228t1	4597.97	3.67757	1.04487	3.51964	0.000432138	0.0116575
ArasteEVm033208t1	18.7733	3.66781	1.17138	3.13118	0.00174105	0.0302877
ArasteEVm008665t1	1186.99	3.65785	1.19919	3.05027	0.00228632	0.0363269
ArasteEVm010712t1	7038.7	3.65504	1.19258	3.06482	0.00217802	0.0352571
ArasteEVm013777t3	200.93	3.64376	1.17171	3.10978	0.00187229	0.0317949
ArasteEVm009229t1	1116.32	3.6329	1.12372	3.23291	0.00122535	0.0240327
ArasteEVm067777t1	340.017	3.62047	1.19707	3.02445	0.00249088	0.0384586
ArasteEVm012869t1	149.76	3.59284	1.17916	3.04694	0.00231187	0.036557
ArasteEVm024306t1	181.995	3.58668	0.919799	3.89942	9.6425e-05	0.00410127
ArasteEVm021517t1	939.114	3.56986	0.963838	3.70379	0.000212398	0.00710944
ArasteEVm037550t1	318.124	3.56344	1.068	3.33657	0.000848195	0.0186265
ArasteEVm001427t2	255.243	3.53155	0.948168	3.72461	0.00019562	0.00668142
ArasteEVm010925t2	975.208	3.50294	1.11516	3.14119	0.0016826	0.0296758
ArasteEVm008658t1	599.003	3.50043	1.09039	3.21027	0.00132611	0.0252738
ArasteEVm011134t4	812.852	3.49467	0.975286	3.58323	0.000339377	0.0098907
ArasteEVm019113t3	341.97	3.48883	1.17737	2.96325	0.00304413	0.0438055
ArasteEVm019113t1	402.703	3.45819	1.15579	2.99207	0.00277094	0.0411573
ArasteEVm059916t1	13.3214	3.457	1.15431	2.99488	0.00274555	0.0409055
ArasteEVm000512t2	290.688	3.45634	1.18499	2.91678	0.0035367	0.0485983
ArasteEVm056376t1	45.1743	3.45052	1.08164	3.19008	0.00142235	0.0266058
ArasteEVm009476t1	1183.61	3.43663	0.951193	3.61297	0.000302715	0.00905081
ArasteEVm005885t1	1235.23	3.43356	0.920259	3.73109	0.000190656	0.00655809
ArasteEVm000951t3	464.107	3.42173	0.808084	4.23437	2.29195e-05	0.00142413
ArasteEVm005678t1	3904.18	3.39446	0.935862	3.62709	0.000286632	0.00874254
ArasteEVm011124t2	1488.07	3.3891	0.850264	3.98594	6.72148e-05	0.00316582
ArasteEVm010925t1	2827.98	3.38282	1.05871	3.19523	0.0013972	0.0262265
ArasteEVm016218t1	4426.96	3.3767	1.06273	3.17738	0.00148612	0.0273344
ArasteEVm020081t1	1504.56	3.35787	0.871455	3.85317	0.000116597	0.00469817
ArasteEVm022278t1	2021.93	3.35586	1.08398	3.09586	0.00196242	0.0328647
ArasteEVm023410t1	303.648	3.3529	0.917042	3.65621	0.000255969	0.00811368
ArasteEVm008240t1	331.243	3.34212	0.950143	3.51749	0.000435649	0.0117301
ArasteEVm004893t1	738.091	3.32667	0.972698	3.42005	0.000626101	0.0149702
ArasteEVm000681t2	508.933	3.3185	1.0763	3.08325	0.00204752	0.033719
ArasteEVm011404t1	6272.07	3.28988	1.02724	3.20263	0.00136177	0.0257609
ArasteEVm015563t1	84.5355	3.28639	0.880442	3.73266	0.00018947	0.0065405
ArasteEVm066064t2	20.6698	3.27894	0.865242	3.78963	0.000150873	0.00561615
ArasteEVm021137t1	586.553	3.27734	1.12564	2.91153	0.00359663	0.0491164
ArasteEVm017280t1	301.425	3.27434	1.09759	2.9832	0.00285253	0.0419832
ArasteEVm062236t1	226.284	3.27123	0.762652	4.28928	1.79252e-05	0.00119008
ArasteEVm016127t2	331.977	3.2369	0.996973	3.24673	0.00116738	0.0233987
ArasteEVm007473t1	1755.99	3.22917	0.941844	3.42856	0.000606793	0.0147191
ArasteEVm006801t1	1694.29	3.21022	0.906786	3.54021	0.000399804	0.0110979
ArasteEVm008573t1	6976.59	3.19768	1.06309	3.00791	0.00263052	0.0398533
ArasteEVm035055t1	63.7191	3.18652	0.907393	3.51173	0.000445195	0.0119275
ArasteEVm011499t1	435.45	3.17971	1.01016	3.14772	0.0016455	0.0293116
ArasteEVm025756t1	1966.58	3.14517	1.07359	2.92958	0.00339417	0.0471486
ArasteEVm032183t1	2471.48	3.14437	0.920279	3.41676	0.000633708	0.0150966
ArasteEVm005519t2	569.978	3.14115	0.671792	4.67578	2.92843e-06	0.000289652
ArasteEVm014149t1	406.81	3.10587	0.891632	3.48335	0.000495183	0.0128546
ArasteEVm016586t1	152.608	3.099	1.03336	2.99895	0.00270916	0.0406256
ArasteEVm013817t1	12782	3.07944	1.03553	2.97379	0.00294149	0.0427952
ArasteEVm006397t2	171.044	3.02391	0.825666	3.66239	0.000249877	0.00797794
ArasteEVm016872t2	565.181	2.99176	0.808829	3.69888	0.000216556	0.00722837
ArasteEVm016644t1	833.951	2.96833	0.935479	3.17305	0.00150845	0.0276063
ArasteEVm005724t1	394.495	2.96806	1.01644	2.92005	0.00349976	0.0482834
ArasteEVm018948t1	534.232	2.96491	0.846053	3.5044	0.000457636	0.0121533
ArasteEVm004282t1	360.824	2.95831	0.940364	3.14592	0.00165565	0.0294145
ArasteEVm010421t1	220.847	2.94653	0.990814	2.97385	0.00294091	0.0427952
ArasteEVm017566t1	840.395	2.94515	0.931689	3.16108	0.00157184	0.0284408
ArasteEVm016391t1	189.949	2.93844	0.79998	3.67315	0.00023958	0.00775737
ArasteEVm000122t5	223.519	2.86002	0.882611	3.24041	0.00119357	0.0236886
ArasteEVm013502t1	85.8976	2.80598	0.937631	2.99263	0.00276585	0.0411195
ArasteEVm010383t4	92.8205	2.80547	0.917163	3.05885	0.00222188	0.0356458
ArasteEVm018286t2	206.209	2.80451	0.875415	3.20364	0.00135704	0.0257185
ArasteEVm004402t1	4838.89	2.78978	0.915529	3.04717	0.00231005	0.0365501
ArasteEVm020493t1	1007.05	2.78955	0.792008	3.52213	0.000428096	0.0115782
ArasteEVm006724t1	5551.61	2.7778	0.935055	2.97073	0.00297088	0.0431098
ArasteEVm005762t1	1024.98	2.7701	0.928973	2.9819	0.00286465	0.0420594
ArasteEVm009171t1	1990.31	2.74765	0.852676	3.22239	0.00127127	0.0245591
ArasteEVm011124t1	563.516	2.74595	0.935033	2.93674	0.00331684	0.0463669
ArasteEVm001725t1	5152.01	2.74426	0.779414	3.52093	0.00043004	0.0116243
ArasteEVm009612t2	1100.59	2.72058	0.899557	3.02435	0.00249164	0.0384586
ArasteEVm013173t3	633.651	2.6655	0.863496	3.08687	0.00202275	0.033436
ArasteEVm003436t7	632.425	2.66189	0.658915	4.03981	5.34941e-05	0.00266185
ArasteEVm015379t1	2041.56	2.65753	0.905627	2.93446	0.0033413	0.0466384
ArasteEVm010758t2	68.0305	2.64605	0.692365	3.82175	0.000132508	0.00516658
ArasteEVm024427t1	538.625	2.64089	0.874411	3.02019	0.00252619	0.0388927
ArasteEVm020140t1	135.333	2.6302	0.878789	2.99298	0.00276269	0.0410978
ArasteEVm002983t3	2625.1	2.62963	0.854041	3.07904	0.00207666	0.0340716
ArasteEVm059760t1	289.13	2.62444	0.824161	3.18438	0.00145064	0.0268859
ArasteEVm009603t1	1833.92	2.60787	0.864921	3.01516	0.00256847	0.0392445
ArasteEVm002983t1	8195.27	2.58955	0.797283	3.24797	0.0011623	0.0233453
ArasteEVm006005t4	70.3592	2.56566	0.792707	3.23658	0.00120972	0.0238593
ArasteEVm021704t3	299.553	2.54874	0.845619	3.01406	0.00257777	0.0393618
ArasteEVm000681t3	1077.47	2.53678	0.769237	3.29779	0.000974501	0.0205527
ArasteEVm032616t1	6381.36	2.51917	0.778045	3.23782	0.00120448	0.0238121
ArasteEVm013173t1	61.9726	2.50146	0.818913	3.05461	0.00225353	0.0359749
ArasteEVm011979t1	1146.85	2.49787	0.756677	3.30111	0.000963037	0.0203908
ArasteEVm014898t1	296.337	2.44752	0.812218	3.01338	0.00258356	0.0394253
ArasteEVm010656t1	361.807	2.43397	0.833755	2.91929	0.00350834	0.0483265
ArasteEVm016467t3	109.156	2.42907	0.816032	2.97668	0.00291387	0.0425232
ArasteEVm008958t1	3247.06	2.41859	0.811769	2.97941	0.00288807	0.0422919
ArasteEVm010124t1	63.6203	2.4021	0.763208	3.14737	0.00164744	0.0293116
ArasteEVm061116t1	212.717	2.38665	0.776246	3.0746	0.00210784	0.0344315
ArasteEVm028491t1	90.1146	2.37701	0.745475	3.18859	0.00142968	0.0266915
ArasteEVm010400t6	143.868	2.33569	0.722182	3.23421	0.00121979	0.0239734
ArasteEVm047759t1	591.387	2.28256	0.779124	2.92965	0.00339342	0.0471486
ArasteEVm029488t1	20.859	2.27427	0.779374	2.91807	0.00352208	0.0484808
ArasteEVm015699t3	6128.68	2.27341	0.778677	2.91959	0.00350495	0.0483137
ArasteEVm008437t2	2987.41	2.26439	0.631561	3.58538	0.000336584	0.0098253
ArasteEVm021709t1	577.038	2.24502	0.733119	3.06229	0.00219653	0.0354239
ArasteEVm020695t1	1020.4	2.24436	0.751011	2.98846	0.00280391	0.0414945
ArasteEVm023314t1	412.889	2.23925	0.703457	3.18321	0.0014565	0.0269429
ArasteEVm015340t1	292.091	2.21552	0.631554	3.50804	0.000451414	0.0120498
ArasteEVm016291t3	3545.91	2.19248	0.615143	3.56418	0.000365	0.0104366
ArasteEVm001985t5	306.746	2.18092	0.665971	3.2748	0.00105738	0.0217793
ArasteEVm023637t1	324.421	2.15776	0.595738	3.622	0.000292339	0.00882247
ArasteEVm000186t7	524.288	2.12321	0.665773	3.18909	0.0014272	0.0266688
ArasteEVm008013t4	924.654	2.12111	0.677103	3.13263	0.0017325	0.0302042
ArasteEVm039958t1	233.51	2.10721	0.652838	3.22777	0.00124761	0.0242838
ArasteEVm020354t5	621.708	2.09702	0.721505	2.90646	0.00365547	0.0497937
ArasteEVm000762t9	480.772	2.0603	0.692725	2.97419	0.00293759	0.0427804
ArasteEVm060468t1	1168.23	2.02531	0.644981	3.1401	0.0016889	0.0297461
ArasteEVm002104t3	3826.53	1.89869	0.627307	3.02672	0.00247219	0.0382772
ArasteEVm001283t4	480.322	1.78274	0.592649	3.00809	0.00262897	0.0398422
ArasteEVm006799t1	320.917	-1.73824	0.597588	-2.90877	0.00362859	0.0494554
ArasteEVm000050t3	322.194	-1.78606	0.602849	-2.9627	0.00304954	0.0438703
ArasteEVm030670t1	461.886	-1.89265	0.594443	-3.1839	0.00145304	0.0269202
ArasteEVm000764t1	421.516	-1.91218	0.648171	-2.95011	0.0031766	0.0450021
ArasteEVm003974t2	272.32	-1.92819	0.66224	-2.91162	0.00359561	0.0491164
ArasteEVm057692t1	52.9785	-1.93783	0.665099	-2.9136	0.00357289	0.0489578
ArasteEVm005166t1	275.43	-1.97128	0.637351	-3.09292	0.00198194	0.0330707
ArasteEVm016494t2	710.001	-1.98858	0.576314	-3.45051	0.000559522	0.0140066
ArasteEVm057691t1	151.717	-1.99426	0.633612	-3.14744	0.00164705	0.0293116
ArasteEVm016648t4	290.745	-2.00766	0.657515	-3.0534	0.00226265	0.0360847
ArasteEVm012938t1	188.854	-2.00794	0.659785	-3.04332	0.00233982	0.0368222
ArasteEVm052936t1	160.357	-2.01079	0.672627	-2.98946	0.00279472	0.0413864
ArasteEVm010346t1	283.12	-2.01421	0.6638	-3.03436	0.00241049	0.0376011
ArasteEVm002117t1	598.053	-2.01674	0.669638	-3.01168	0.00259805	0.0395841
ArasteEVm062050t1	116.842	-2.04943	0.628747	-3.25955	0.0011159	0.022667
ArasteEVm001619t1	836.215	-2.05453	0.645929	-3.18074	0.00146901	0.027133
ArasteEVm000608t7	316.633	-2.0609	0.623674	-3.30446	0.000951602	0.0202016
ArasteEVm009001t1	245.339	-2.0808	0.658749	-3.15871	0.00158468	0.0286151
ArasteEVm072127t1	113.339	-2.08669	0.675726	-3.08808	0.00201457	0.0333577
ArasteEVm001944t1	369.75	-2.12632	0.626329	-3.39489	0.00068657	0.01599
ArasteEVm004213t2	501.976	-2.13422	0.706224	-3.02201	0.00251103	0.0386887
ArasteEVm050271t1	163.855	-2.14107	0.663708	-3.22593	0.00125565	0.0243815
ArasteEVm044428t2	80.0296	-2.14744	0.725385	-2.96042	0.00307219	0.0441046
ArasteEVm051670t1	296.36	-2.15662	0.59949	-3.59742	0.00032139	0.00948046
ArasteEVm013525t1	483.314	-2.1628	0.651254	-3.32097	0.000897054	0.019366
ArasteEVm006249t2	541.273	-2.17571	0.713404	-3.04976	0.00229026	0.0363457
ArasteEVm063548t1	89.1673	-2.21614	0.713797	-3.10472	0.00190462	0.0321524
ArasteEVm001463t3	245.863	-2.22641	0.709209	-3.13929	0.00169359	0.0297829
ArasteEVm003154t4	946.244	-2.22875	0.65599	-3.39754	0.000679954	0.0159048
ArasteEVm011799t2	306.63	-2.23954	0.730627	-3.06523	0.00217503	0.0352323
ArasteEVm013312t2	278.285	-2.27744	0.743034	-3.06506	0.00217625	0.0352403
ArasteEVm010296t3	66.1513	-2.28983	0.785731	-2.91427	0.00356517	0.0489046
ArasteEVm000336t1	439.409	-2.29246	0.766689	-2.99008	0.002789	0.0413495
ArasteEVm046258t1	76.9047	-2.30235	0.744478	-3.09258	0.00198427	0.0330707
ArasteEVm004287t4	1126.21	-2.30595	0.621212	-3.71202	0.000205609	0.00694692
ArasteEVm023298t3	102.577	-2.30602	0.754681	-3.05563	0.00224591	0.0359123
ArasteEVm015183t1	429.19	-2.3089	0.744627	-3.10074	0.00193035	0.0324547
ArasteEVm005567t1	339.406	-2.31453	0.582763	-3.97164	7.13791e-05	0.00329472
ArasteEVm007921t3	153.843	-2.315	0.709539	-3.26269	0.00110361	0.0225117
ArasteEVm001773t4	2285.13	-2.31517	0.636054	-3.63989	0.000272753	0.00845761
ArasteEVm031255t1	353.878	-2.322	0.784205	-2.96096	0.00306686	0.0440541
ArasteEVm009644t2	194.433	-2.32584	0.615045	-3.78157	0.000155842	0.00572892
ArasteEVm002524t3	485.912	-2.32789	0.640095	-3.6368	0.000276051	0.0085163
ArasteEVm003309t2	133.602	-2.33769	0.619021	-3.77643	0.000159091	0.00579737
ArasteEVm002136t1	1085.71	-2.36076	0.728826	-3.23913	0.00119896	0.0237335
ArasteEVm057932t1	339.39	-2.36162	0.714357	-3.30594	0.000946597	0.0201564
ArasteEVm008014t2	156.016	-2.37203	0.733119	-3.23552	0.0012142	0.0239022
ArasteEVm013157t4	78.7108	-2.37245	0.667212	-3.55576	0.000376884	0.0106714
ArasteEVm003177t5	1330.33	-2.38341	0.599543	-3.97538	7.02663e-05	0.00326826
ArasteEVm036582t1	190.153	-2.39037	0.652932	-3.66099	0.000251245	0.00801108
ArasteEVm008993t1	751.121	-2.40208	0.723657	-3.31937	0.000902208	0.0194512
ArasteEVm006002t10	45.9354	-2.43025	0.765351	-3.17534	0.00149661	0.0274544
ArasteEVm003217t1	975.77	-2.43619	0.775899	-3.13983	0.00169048	0.0297461
ArasteEVm016228t4	47.5519	-2.44437	0.815921	-2.99585	0.00273685	0.0408514
ArasteEVm005073t4	53.7628	-2.46859	0.804304	-3.06922	0.00214618	0.0348815
ArasteEVm070335t2	161.518	-2.47465	0.767	-3.2264	0.00125359	0.0243806
ArasteEVm031566t1	775.556	-2.47992	0.751588	-3.29957	0.000968328	0.0204849
ArasteEVm035826t4	102.167	-2.48483	0.764479	-3.25036	0.00115259	0.0231887
ArasteEVm013370t1	429.961	-2.48895	0.762542	-3.26402	0.00109844	0.0224249
ArasteEVm037855t2	832.107	-2.51245	0.802142	-3.13218	0.00173516	0.0302231
ArasteEVm008545t2	1165.9	-2.5145	0.726363	-3.46177	0.000536645	0.0136244
ArasteEVm003760t1	221.385	-2.5224	0.678649	-3.7168	0.000201763	0.00685727
ArasteEVm000620t3	418.749	-2.52712	0.806246	-3.13443	0.00172187	0.0300945
ArasteEVm028429t4	204.711	-2.52849	0.809842	-3.1222	0.00179506	0.0309166
ArasteEVm001626t1	449.253	-2.53856	0.635355	-3.9955	6.45587e-05	0.00310132
ArasteEVm055654t1	202.851	-2.57259	0.786232	-3.27205	0.0010677	0.0219639
ArasteEVm001941t3	82.9292	-2.60185	0.833691	-3.12088	0.00180311	0.0309865
ArasteEVm036518t1	135.898	-2.6097	0.81218	-3.21321	0.00131261	0.0250757
ArasteEVm018919t1	261.492	-2.61941	0.718062	-3.64789	0.000264406	0.00827823
ArasteEVm002647t1	1052.47	-2.62574	0.794402	-3.3053	0.000948742	0.0201728
ArasteEVm009578t1	1692.56	-2.63205	0.828748	-3.17593	0.00149357	0.0274249
ArasteEVm004866t1	811.157	-2.64101	0.863785	-3.05748	0.00223206	0.0357468
ArasteEVm010313t3	139.103	-2.67558	0.736841	-3.63116	0.000282154	0.00864404
ArasteEVm002477t1	67.976	-2.68209	0.740528	-3.62186	0.000292492	0.00882247
ArasteEVm000924t5	108.593	-2.69763	0.908368	-2.96976	0.00298036	0.0432215
ArasteEVm005559t1	472.933	-2.70426	0.765629	-3.53208	0.000412309	0.0113282
ArasteEVm011343t4	240.873	-2.71828	0.702906	-3.86721	0.000110088	0.00452165
ArasteEVm002954t2	540.471	-2.72167	0.85353	-3.18872	0.00142903	0.0266896
ArasteEVm019267t3	1217.39	-2.72988	0.704491	-3.87496	0.00010664	0.00441746
ArasteEVm004846t1	575.078	-2.73266	0.728588	-3.75063	0.000176392	0.00623322
ArasteEVm012668t1	199.445	-2.73661	0.881061	-3.10604	0.0018961	0.0320868
ArasteEVm012808t1	108.981	-2.74186	0.720059	-3.80782	0.000140196	0.00537558
ArasteEVm006317t3	475.296	-2.74746	0.849832	-3.23294	0.00122522	0.0240327
ArasteEVm004102t1	305.312	-2.7652	0.859489	-3.21726	0.0012942	0.0248514
ArasteEVm009728t12	104.979	-2.79146	0.79899	-3.49373	0.000476318	0.0125056
ArasteEVm002127t4	76.9283	-2.80395	0.915382	-3.06315	0.00219022	0.0353955
ArasteEVm058311t1	52.5145	-2.80703	0.868643	-3.23151	0.00123138	0.0240955
ArasteEVm051353t1	657.469	-2.8182	0.77513	-3.63578	0.000277146	0.00854462
ArasteEVm005926t1	814.47	-2.81882	0.903683	-3.11925	0.0018131	0.0311058
ArasteEVm002903t2	90.8095	-2.82148	0.945301	-2.98474	0.00283817	0.04181
ArasteEVm022952t1	46.5478	-2.83172	0.964006	-2.93745	0.00330922	0.0463005
ArasteEVm048663t1	2395.72	-2.8442	0.697758	-4.07619	4.57791e-05	0.00236035
ArasteEVm020626t2	107.252	-2.85417	0.946429	-3.01572	0.00256368	0.0392084
ArasteEVm020479t1	332.146	-2.8588	0.958605	-2.98224	0.00286143	0.0420458
ArasteEVm008521t5	227.701	-2.86319	0.870697	-3.28839	0.00100763	0.021059
ArasteEVm031808t1	216.522	-2.86833	0.908834	-3.15605	0.00159921	0.0287703
ArasteEVm030331t1	82.9505	-2.87717	0.852976	-3.37309	0.000743292	0.0169914
ArasteEVm004938t1	327.793	-2.87874	0.722412	-3.9849	6.75081e-05	0.00317039
ArasteEVm058232t1	75.8501	-2.96044	0.985035	-3.00541	0.0026522	0.0400442
ArasteEVm007967t1	188.657	-2.96316	0.827174	-3.58226	0.00034063	0.00990934
ArasteEVm010433t1	159.982	-2.96865	0.794593	-3.73606	0.000186925	0.00648497
ArasteEVm019775t1	273.157	-3.0053	0.889692	-3.37791	0.000730403	0.016793
ArasteEVm000003t1	1390	-3.0149	0.804496	-3.74756	0.00017856	0.0062802
ArasteEVm002845t1	649.383	-3.01669	1.00137	-3.01255	0.00259062	0.0394958
ArasteEVm014915t3	204.775	-3.01914	0.827467	-3.64865	0.000263622	0.00827222
ArasteEVm003737t5	318.778	-3.02595	0.858024	-3.52665	0.000420851	0.0114397
ArasteEVm004846t5	345.619	-3.04509	0.715216	-4.25758	2.06649e-05	0.00132304
ArasteEVm004564t6	668.866	-3.06669	0.961628	-3.18906	0.00142737	0.0266688
ArasteEVm018375t3	411.545	-3.09869	0.677728	-4.57217	4.82697e-06	0.000426905
ArasteEVm006139t1	31.6161	-3.11255	1.04091	-2.99021	0.00278782	0.0413447
ArasteEVm001355t4	845.252	-3.11894	0.756604	-4.12229	3.75123e-05	0.0020291
ArasteEVm000206t2	196.684	-3.12055	0.922664	-3.38211	0.000719303	0.016585
ArasteEVm000985t1	1332.3	-3.14187	0.71239	-4.41033	1.03214e-05	0.000779188
ArasteEVm061328t1	268.708	-3.15013	0.760557	-4.14188	3.44477e-05	0.00189677
ArasteEVm020974t1	63.1411	-3.1832	0.959866	-3.31629	0.000912207	0.0196319
ArasteEVm059967t1	303.498	-3.19155	0.83452	-3.82441	0.000131084	0.00513177
ArasteEVm003628t1	147.767	-3.19215	0.897954	-3.55492	0.000378098	0.0106913
ArasteEVm059299t1	203.332	-3.24107	0.811812	-3.99239	6.54115e-05	0.00311376
ArasteEVm009874t4	28.5542	-3.26172	1.11354	-2.92915	0.00339886	0.0471868
ArasteEVm004916t1	1672.65	-3.2788	1.04951	-3.12413	0.0017833	0.0307687
ArasteEVm002924t2	306.487	-3.28216	0.893251	-3.67439	0.000238416	0.00773949
ArasteEVm015254t1	1471.02	-3.28449	0.801277	-4.09907	4.1482e-05	0.00219307
ArasteEVm008058t1	3268.52	-3.30436	1.04998	-3.14707	0.00164914	0.0293269
ArasteEVm055656t1	33.6471	-3.30771	1.05066	-3.14822	0.00164269	0.0292916
ArasteEVm001689t1	384.234	-3.31199	0.754707	-4.38844	1.14167e-05	0.00084099
ArasteEVm001562t7	74.8196	-3.32807	1.13413	-2.93447	0.00334116	0.0466384
ArasteEVm050815t1	28.4635	-3.33385	1.11994	-2.97682	0.00291257	0.0425182
ArasteEVm063580t1	72.1542	-3.35321	1.01457	-3.30505	0.000949608	0.020177
ArasteEVm014694t6	31.839	-3.35415	1.06032	-3.16333	0.00155975	0.0283127
ArasteEVm002036t6	39.596	-3.35554	1.05345	-3.18527	0.00144617	0.0268545
ArasteEVm029815t1	25.8382	-3.35834	0.959722	-3.49929	0.000466504	0.0123213
ArasteEVm031796t1	569.573	-3.37535	0.987053	-3.41962	0.000627086	0.014979
ArasteEVm004588t2	179.198	-3.37669	0.828126	-4.07751	4.55214e-05	0.00234957
ArasteEVm032736t1	68.9258	-3.38146	1.10601	-3.05734	0.00223311	0.0357468
ArasteEVm001459t3	193.727	-3.38146	0.905756	-3.7333	0.000188984	0.00653768
ArasteEVm009954t2	26.1893	-3.39047	1.04625	-3.2406	0.00119276	0.0236823
ArasteEVm015999t3	95.5499	-3.39729	1.16249	-2.92242	0.00347319	0.0479988
ArasteEVm038750t3	204.365	-3.40094	1.00337	-3.38951	0.000700184	0.0162402
ArasteEVm015284t3	23.2955	-3.41536	1.13231	-3.01628	0.002559	0.039166
ArasteEVm034169t1	61.1784	-3.42723	1.10867	-3.0913	0.00199283	0.0331906
ArasteEVm020868t1	68.1625	-3.44297	0.988917	-3.48156	0.000498507	0.0129132
ArasteEVm050140t1	89.8576	-3.44509	1.15292	-2.98815	0.00280671	0.0415232
ArasteEVm066845t1	209.873	-3.44868	1.04755	-3.29213	0.000994331	0.0208581
ArasteEVm011173t2	135.131	-3.45107	1.18203	-2.91961	0.0035047	0.0483137
ArasteEVm011947t4	23.9685	-3.45899	1.14867	-3.01131	0.00260119	0.0395946
ArasteEVm050827t1	41.0381	-3.47426	1.14238	-3.04125	0.00235597	0.0370007
ArasteEVm027582t2	156.737	-3.48128	0.821107	-4.23974	2.23783e-05	0.00140336
ArasteEVm006956t1	3634.86	-3.49258	1.17209	-2.97977	0.00288463	0.0422919
ArasteEVm001773t5	487.137	-3.49817	1.15215	-3.0362	0.00239584	0.037421
ArasteEVm000196t1	143.876	-3.50059	1.03685	-3.37616	0.000735043	0.0168518
ArasteEVm015103t5	89.9904	-3.50119	1.13123	-3.09503	0.0019679	0.0329111
ArasteEVm003934t1	65.6808	-3.50632	1.12285	-3.12269	0.00179206	0.0308869
ArasteEVm000626t4	53.4986	-3.52546	1.14192	-3.08732	0.00201972	0.0334087
ArasteEVm048179t3	38.8078	-3.53572	1.05828	-3.34101	0.000834741	0.0184061
ArasteEVm011061t4	78.0927	-3.53831	1.10271	-3.20873	0.00133322	0.0253496
ArasteEVm002870t4	81.5769	-3.55265	1.11439	-3.18797	0.00143274	0.0267073
ArasteEVm065290t1	100.71	-3.55346	1.18534	-2.99783	0.0027191	0.0406858
ArasteEVm001159t1	255.529	-3.55894	1.2202	-2.91669	0.00353763	0.0485983
ArasteEVm028962t1	272.459	-3.57681	0.952299	-3.75597	0.000172669	0.00614833
ArasteEVm045145t1	28.037	-3.57875	1.08178	-3.3082	0.000938991	0.0200393
ArasteEVm027440t1	117.271	-3.59908	0.837447	-4.29768	1.72592e-05	0.00115219
ArasteEVm024804t1	70.4333	-3.60158	0.889445	-4.04925	5.13824e-05	0.00259136
ArasteEVm049212t1	147.302	-3.60825	0.731956	-4.9296	8.23984e-07	0.000103459
ArasteEVm025036t1	154.35	-3.6117	0.986683	-3.66044	0.000251781	0.0080229
ArasteEVm014398t1	21.288	-3.62213	1.22852	-2.94836	0.00319465	0.0451307
ArasteEVm042448t1	163.137	-3.62238	1.16477	-3.10995	0.00187121	0.0317876
ArasteEVm046686t1	66.0984	-3.63851	1.09444	-3.32454	0.000885635	0.0192136
ArasteEVm010409t1	14.9379	-3.63915	1.15098	-3.16179	0.00156803	0.0284098
ArasteEVm012389t4	30.3284	-3.64717	1.11489	-3.27133	0.00107042	0.0220013
ArasteEVm063478t1	54.7064	-3.64759	1.18193	-3.08613	0.00202777	0.033497
ArasteEVm002492t1	1047.78	-3.65703	1.12812	-3.24169	0.00118823	0.0236214
ArasteEVm000178t1	457.378	-3.66913	0.680119	-5.39483	6.85873e-08	1.31911e-05
ArasteEVm000924t8	139.003	-3.67333	1.20843	-3.03976	0.00236764	0.0371479
ArasteEVm007623t4	81.0875	-3.67514	1.15441	-3.18357	0.00145473	0.0269308
ArasteEVm021485t1	29.4258	-3.67894	1.02144	-3.6017	0.000316143	0.00937136
ArasteEVm028332t2	18.7136	-3.68531	1.23077	-2.99431	0.00275069	0.040957
ArasteEVm013858t4	16.753	-3.69881	1.22828	-3.01137	0.00260073	0.0395946
ArasteEVm011801t3	55.5325	-3.6992	1.21119	-3.05418	0.00225676	0.0360027
ArasteEVm008521t4	96.1292	-3.71181	1.13873	-3.25961	0.00111565	0.022667
ArasteEVm020587t4	43.7911	-3.71477	1.24352	-2.9873	0.00281452	0.0415753
ArasteEVm016574t3	24.7175	-3.73603	1.15861	-3.22458	0.00126156	0.0244474
ArasteEVm002265t2	63.5715	-3.73609	1.16072	-3.21877	0.00128742	0.0247603
ArasteEVm008368t1	22.3844	-3.73869	1.17883	-3.17153	0.00151636	0.0277015
ArasteEVm006352t2	46.9983	-3.74779	1.2249	-3.05966	0.00221587	0.0356082
ArasteEVm007996t3	80.1542	-3.749	1.28718	-2.91258	0.00358457	0.0490485
ArasteEVm017651t1	120.876	-3.75344	1.17547	-3.19313	0.00140741	0.0263976
ArasteEVm017945t1	276.02	-3.75687	0.829654	-4.52823	5.94786e-06	0.000501337
ArasteEVm014299t7	42.7766	-3.76145	1.25457	-2.99819	0.00271586	0.0406632
ArasteEVm062554t1	189.639	-3.76274	1.00755	-3.73455	0.000188053	0.00651476
ArasteEVm005174t3	127.943	-3.76491	1.19565	-3.14885	0.00163915	0.0292608
ArasteEVm004182t3	51.3636	-3.76669	1.19059	-3.16372	0.00155767	0.0282962
ArasteEVm003001t2	126.996	-3.76698	1.19288	-3.15788	0.00158919	0.0286643
ArasteEVm000050t2	97.1154	-3.76962	1.14914	-3.28038	0.00103666	0.0214713
ArasteEVm015298t3	24.1074	-3.77126	1.04308	-3.6155	0.000299767	0.00899598
ArasteEVm007390t1	73.9739	-3.79358	1.26264	-3.00447	0.00266044	0.0401378
ArasteEVm014948t4	124.631	-3.80193	0.95514	-3.9805	6.87709e-05	0.00320794
ArasteEVm020466t2	31.2836	-3.80489	1.18354	-3.21484	0.00130517	0.0249828
ArasteEVm010960t1	214.29	-3.80638	1.12761	-3.37561	0.000736519	0.0168696
ArasteEVm004916t5	230.458	-3.80712	1.09951	-3.46255	0.000535076	0.0136131
ArasteEVm002095t1	701.929	-3.81339	1.05791	-3.60466	0.000312566	0.00929947
ArasteEVm001974t2	282.921	-3.81634	1.28761	-2.96389	0.00303781	0.0437795
ArasteEVm029417t3	35.7003	-3.81992	1.09057	-3.50269	0.000460593	0.0122094
ArasteEVm056116t1	118.451	-3.8322	1.29906	-2.94997	0.00317806	0.0450021
ArasteEVm012116t1	1477.47	-3.83224	1.03241	-3.71193	0.000205687	0.00694692
ArasteEVm000409t1	289.41	-3.83347	1.27657	-3.00296	0.00267372	0.0402186
ArasteEVm002439t1	226.64	-3.84146	1.17945	-3.25699	0.00112601	0.0227958
ArasteEVm000036t6	55.5596	-3.85141	1.13588	-3.39069	0.000697158	0.01619
ArasteEVm005993t2	63.3809	-3.85856	1.06733	-3.61515	0.000300175	0.00900264
ArasteEVm001177t7	21.0951	-3.86	1.30826	-2.9505	0.00317263	0.0449999
ArasteEVm003191t1	217.573	-3.86914	1.24303	-3.11267	0.00185405	0.0315514
ArasteEVm073038t1	11.6231	-3.86976	1.26172	-3.06706	0.00216179	0.0350764
ArasteEVm063782t1	26.385	-3.87409	1.19564	-3.2402	0.00119448	0.0236938
ArasteEVm041923t3	11.619	-3.87532	1.19924	-3.23149	0.00123147	0.0240955
ArasteEVm019714t1	71.4533	-3.89316	1.07678	-3.61557	0.000299691	0.00899598
ArasteEVm020869t1	28.6625	-3.89333	1.20299	-3.23638	0.00121054	0.0238593
ArasteEVm051160t1	17.2534	-3.90266	1.15221	-3.38711	0.000706331	0.0163425
ArasteEVm026457t1	22.5402	-3.90764	1.12179	-3.4834	0.000495094	0.0128546
ArasteEVm013822t1	2137.69	-3.917	1.24681	-3.14162	0.00168016	0.0296758
ArasteEVm035581t1	17.9091	-3.92103	1.12513	-3.48496	0.00049221	0.0128255
ArasteEVm020092t5	16.1393	-3.92234	1.3232	-2.96428	0.00303391	0.0437494
ArasteEVm054850t1	21.2868	-3.92637	1.34616	-2.91673	0.00353722	0.0485983
ArasteEVm017369t1	37.9517	-3.92859	1.31925	-2.9779	0.00290228	0.0424447
ArasteEVm024449t1	108.502	-3.94897	1.31814	-2.99586	0.00273672	0.0408514
ArasteEVm013088t2	83.9217	-3.95336	1.30646	-3.02602	0.00247796	0.0383084
ArasteEVm012322t3	57.0543	-3.95828	1.20236	-3.2921	0.000994416	0.0208581
ArasteEVm000646t18	16.4925	-3.96014	1.34505	-2.94423	0.00323757	0.0455478
ArasteEVm000822t3	53.1314	-3.96054	1.1873	-3.33577	0.000850649	0.018655
ArasteEVm003685t5	126.817	-3.98605	1.17767	-3.38469	0.000712599	0.0164539
ArasteEVm001603t2	60.9192	-4.01014	0.990288	-4.04947	5.13334e-05	0.00259136
ArasteEVm003697t1	58.3123	-4.01346	1.24609	-3.22085	0.00127809	0.0246592
ArasteEVm039594t2	9.48158	-4.02489	1.31409	-3.06286	0.00219231	0.0354056
ArasteEVm001845t3	71.3121	-4.03143	1.16154	-3.47077	0.000518969	0.0133222
ArasteEVm035518t1	12.9162	-4.03658	1.27227	-3.17274	0.00151007	0.0276073
ArasteEVm043174t1	23.0008	-4.0379	1.09291	-3.69463	0.000220209	0.00730645
ArasteEVm027117t1	21.5861	-4.03878	1.34572	-3.00121	0.00268911	0.0403624
ArasteEVm006011t1	46.4725	-4.04032	1.22878	-3.28807	0.00100877	0.0210621
ArasteEVm000585t1	123.682	-4.04059	0.695648	-5.80839	6.30775e-09	1.62613e-06
ArasteEVm060432t1	23.1449	-4.05611	1.37781	-2.94388	0.00324131	0.045573
ArasteEVm012908t3	12.0375	-4.06013	1.3234	-3.06795	0.00215534	0.0349953
ArasteEVm000436t2	123.792	-4.06336	1.17692	-3.45254	0.000555325	0.0139167
ArasteEVm009881t4	42.1412	-4.06547	1.12139	-3.62538	0.000288533	0.00875097
ArasteEVm000559t3	88.6458	-4.06828	1.15656	-3.51757	0.000435519	0.0117301
ArasteEVm001048t1	135.767	-4.06977	1.30412	-3.1207	0.00180423	0.0309865
ArasteEVm006316t1	66.5046	-4.07185	1.03833	-3.92153	8.79871e-05	0.00383833
ArasteEVm000023t2	218.931	-4.07751	1.21305	-3.36138	0.000775535	0.0174874
ArasteEVm002041t5	26.4139	-4.07933	1.3348	-3.05613	0.00224212	0.0358636
ArasteEVm015894t3	43.4182	-4.07948	1.35106	-3.01946	0.00253226	0.0389055
ArasteEVm004383t6	23.6202	-4.08173	1.22793	-3.32407	0.00088715	0.0192368
ArasteEVm047140t3	20.7145	-4.08463	1.39329	-2.93165	0.00337166	0.0469302
ArasteEVm003972t4	58.6199	-4.10786	1.4112	-2.91091	0.00360383	0.0492009
ArasteEVm009392t2	29.8103	-4.11094	1.4059	-2.92406	0.00345499	0.0477881
ArasteEVm013928t3	49.2505	-4.11115	1.1642	-3.53131	0.000413512	0.0113291
ArasteEVm025259t1	40.1559	-4.12146	1.19777	-3.44094	0.000579697	0.0143638
ArasteEVm054013t1	53.9141	-4.12167	1.0375	-3.9727	7.10617e-05	0.0032832
ArasteEVm003799t2	88.5103	-4.12379	1.11272	-3.70604	0.000210522	0.00706102
ArasteEVm003631t7	25.29	-4.12972	1.24175	-3.32572	0.000881894	0.0191496
ArasteEVm053671t1	18.5852	-4.13086	1.28457	-3.21575	0.00130102	0.0249329
ArasteEVm000934t1	1131.92	-4.13548	1.39741	-2.95939	0.00308247	0.0442258
ArasteEVm043553t2	18.6041	-4.13731	1.3281	-3.11522	0.00183808	0.0313789
ArasteEVm037856t2	18.5797	-4.14081	1.42195	-2.91208	0.00359035	0.0491083
ArasteEVm021320t1	1967.24	-4.14194	1.12672	-3.6761	0.000236823	0.00771205
ArasteEVm051092t1	22.4584	-4.14858	1.30735	-3.17328	0.00150729	0.0276004
ArasteEVm000039t1	254.237	-4.14953	1.26886	-3.27028	0.00107441	0.0220552
ArasteEVm004454t23	98.2094	-4.15223	1.14671	-3.62101	0.000293454	0.00883388
ArasteEVm045699t1	27.4232	-4.15887	1.34471	-3.09277	0.00198296	0.0330707
ArasteEVm036578t1	12.9383	-4.16811	1.31839	-3.16151	0.00156953	0.0284263
ArasteEVm017908t2	28.1501	-4.17138	1.31714	-3.167	0.00154018	0.0280626
ArasteEVm000985t3	805.375	-4.17356	1.20334	-3.46832	0.000523722	0.0134158
ArasteEVm064342t1	25.2409	-4.17698	1.17887	-3.54322	0.000395276	0.01101
ArasteEVm004255t1	37.2744	-4.18095	1.42631	-2.9313	0.00337549	0.04697
ArasteEVm008913t6	20.8654	-4.18939	1.14078	-3.6724	0.000240284	0.00775856
ArasteEVm033150t1	347.498	-4.19215	0.968814	-4.3271	1.51087e-05	0.00104162
ArasteEVm018768t3	26.344	-4.19911	1.18986	-3.52907	0.000417026	0.0113774
ArasteEVm008431t1	281.055	-4.20136	1.32616	-3.16807	0.00153456	0.0279812
ArasteEVm001104t5	47.1093	-4.202	1.39171	-3.01932	0.00253344	0.0389055
ArasteEVm000985t20	113.754	-4.20287	1.27664	-3.29213	0.000994321	0.0208581
ArasteEVm005589t1	199.468	-4.2069	1.35337	-3.10846	0.00188063	0.0318917
ArasteEVm005597t2	41.9079	-4.21017	1.09596	-3.84155	0.000122262	0.00487699
ArasteEVm016329t1	76.0361	-4.21022	1.36334	-3.08816	0.00201397	0.0333577
ArasteEVm000304t1	10667.7	-4.214	0.899638	-4.6841	2.81188e-06	0.000282464
ArasteEVm009152t4	32.0323	-4.2155	1.34767	-3.128	0.00176002	0.0305105
ArasteEVm002399t3	113.23	-4.23613	1.21547	-3.48517	0.000491828	0.0128224
ArasteEVm059774t1	22.9968	-4.23625	1.36898	-3.09447	0.00197166	0.03296
ArasteEVm071437t1	24.7258	-4.2412	1.37134	-3.09274	0.00198316	0.0330707
ArasteEVm025120t1	36.3521	-4.26545	1.33629	-3.192	0.00141292	0.0264908
ArasteEVm000376t4	78.1114	-4.26861	1.45114	-2.94155	0.00326578	0.0457984
ArasteEVm062739t1	46.3783	-4.28227	1.4288	-2.99711	0.00272549	0.040732
ArasteEVm000286t2	177.184	-4.28291	1.29618	-3.30426	0.000952287	0.0202041
ArasteEVm072117t1	12.458	-4.28911	1.37334	-3.12312	0.00178947	0.0308532
ArasteEVm054146t1	25.5828	-4.2899	1.38145	-3.10535	0.00190052	0.0321003
ArasteEVm063188t2	199.195	-4.29005	1.2314	-3.48389	0.000494191	0.0128426
ArasteEVm008055t1	296.33	-4.29147	1.23657	-3.47045	0.000519582	0.0133309
ArasteEVm000009t3	313.032	-4.29184	1.25203	-3.4279	0.000608276	0.0147404
ArasteEVm059046t1	333.77	-4.29433	1.21391	-3.5376	0.000403784	0.0111636
ArasteEVm006003t1	23.9798	-4.29454	1.32392	-3.2438	0.00117946	0.0235049
ArasteEVm025990t1	65.2368	-4.2964	1.17985	-3.64148	0.000271071	0.00844327
ArasteEVm002436t6	14.1378	-4.31279	1.38735	-3.10865	0.00187943	0.0318826
ArasteEVm003156t4	54.1673	-4.31868	1.46376	-2.9504	0.0031736	0.0450005
ArasteEVm009884t1	17.462	-4.3199	1.47856	-2.92169	0.0034814	0.0480739
ArasteEVm001378t7	64.386	-4.32229	1.22471	-3.52923	0.00041677	0.0113774
ArasteEVm040508t1	17.2336	-4.32984	1.31796	-3.28526	0.00101887	0.021187
ArasteEVm007710t1	35.3387	-4.33071	1.39701	-3.09999	0.00193529	0.0325227
ArasteEVm072128t1	12.9873	-4.34219	1.45372	-2.98694	0.00281787	0.041612
ArasteEVm015765t1	86.0741	-4.34261	1.48081	-2.93259	0.00336147	0.0468286
ArasteEVm024792t3	10.9308	-4.3439	1.46535	-2.96441	0.00303264	0.043744
ArasteEVm009966t2	26.5958	-4.34619	1.4265	-3.04674	0.00231337	0.0365573
ArasteEVm056313t1	22.1206	-4.35268	1.38532	-3.14201	0.0016779	0.0296758
ArasteEVm003897t5	254.629	-4.35549	1.26701	-3.43762	0.000586854	0.0144378
ArasteEVm016188t1	29.9865	-4.36036	1.47138	-2.96345	0.00304213	0.0437897
ArasteEVm000080t2	375.993	-4.3614	1.27053	-3.43273	0.000597547	0.0145896
ArasteEVm046134t1	25.106	-4.36232	1.32442	-3.29376	0.000988581	0.0207864
ArasteEVm040579t1	38.164	-4.36295	1.37039	-3.18374	0.00145387	0.0269252
ArasteEVm031598t1	41.8195	-4.3655	1.28279	-3.40312	0.000666209	0.0156652
ArasteEVm002954t3	49.1191	-4.36729	1.46282	-2.98553	0.00283086	0.0417523
ArasteEVm029450t2	14.8586	-4.36933	1.28786	-3.39271	0.000692047	0.016079
ArasteEVm035216t1	42.3699	-4.37215	0.859911	-5.08442	3.68753e-07	5.43221e-05
ArasteEVm006994t1	2899.23	-4.37359	0.992426	-4.40696	1.0483e-05	0.00078527
ArasteEVm016734t4	14.794	-4.37408	1.36731	-3.19904	0.00137888	0.0260034
ArasteEVm001698t3	308.943	-4.3779	1.45679	-3.00517	0.00265431	0.0400635
ArasteEVm001811t7	622.441	-4.38718	1.37953	-3.1802	0.00147172	0.0271698
ArasteEVm057321t1	68.6077	-4.38964	1.2802	-3.42888	0.00060608	0.0147092
ArasteEVm045133t3	12.6548	-4.3899	1.29771	-3.38281	0.000717484	0.016551
ArasteEVm004700t1	14.8856	-4.39443	1.46044	-3.00897	0.00262133	0.0398136
ArasteEVm000050t5	67.5887	-4.39607	1.46612	-2.99843	0.00271372	0.0406437
ArasteEVm001679t1	22.8067	-4.39702	1.41086	-3.11655	0.00182983	0.0313024
ArasteEVm004869t5	64.5265	-4.40454	1.40477	-3.13542	0.00171608	0.0300367
ArasteEVm010696t3	44.9516	-4.41642	1.16829	-3.78025	0.000156672	0.00574378
ArasteEVm033022t1	494.164	-4.42394	0.963271	-4.59263	4.37703e-06	0.000395675
ArasteEVm000105t7	62.0398	-4.43322	1.49099	-2.97333	0.00294584	0.0428362
ArasteEVm019338t2	167.098	-4.44067	1.22474	-3.62579	0.000288077	0.00874806
ArasteEVm018814t1	11.8063	-4.44163	1.40733	-3.15607	0.00159911	0.0287703
ArasteEVm001587t2	40.8244	-4.44461	1.46243	-3.0392	0.00237211	0.0372061
ArasteEVm000807t4	48.0822	-4.44759	1.49102	-2.98292	0.00285516	0.0420001
ArasteEVm052963t1	183.275	-4.45223	1.1716	-3.80011	0.000144631	0.00547029
ArasteEVm045363t1	9.21307	-4.45896	1.48259	-3.00755	0.00263362	0.0398624
ArasteEVm023441t1	48.705	-4.46054	1.40863	-3.16658	0.00154241	0.0280927
ArasteEVm023987t1	19.3547	-4.46389	1.48236	-3.01133	0.00260102	0.0395946
ArasteEVm020751t2	28.8536	-4.46413	1.49331	-2.98943	0.00279498	0.0413864
ArasteEVm008846t1	38.7158	-4.46552	1.43066	-3.12131	0.00180048	0.030964
ArasteEVm008783t3	52.4713	-4.46715	1.49636	-2.98535	0.00283254	0.0417524
ArasteEVm004434t1	19.1923	-4.47445	1.54004	-2.9054	0.00366779	0.0499335
ArasteEVm005242t11	49.6522	-4.49492	1.49652	-3.00358	0.00266827	0.040174
ArasteEVm000674t1	115.169	-4.49805	1.18156	-3.80688	0.00014073	0.00537905
ArasteEVm003269t2	40.192	-4.50036	1.19201	-3.77546	0.000159716	0.00580342
ArasteEVm002657t2	105.649	-4.5029	1.53073	-2.94167	0.0032645	0.0457984
ArasteEVm048082t1	23.8969	-4.50339	1.28078	-3.51613	0.000437895	0.0117831
ArasteEVm011208t1	23.5621	-4.50448	1.47335	-3.05731	0.00223335	0.0357468
ArasteEVm001126t1	31.2438	-4.50497	1.44039	-3.12761	0.00176235	0.0305159
ArasteEVm018612t4	76.49	-4.5059	1.48695	-3.0303	0.00244311	0.037939
ArasteEVm001571t6	14.501	-4.51448	1.42659	-3.16454	0.00155331	0.0282486
ArasteEVm023662t1	14.5378	-4.51813	1.36033	-3.32136	0.000895804	0.0193476
ArasteEVm012870t5	24.1082	-4.52069	1.29616	-3.48775	0.000487095	0.0127333
ArasteEVm004897t4	31.5494	-4.52106	1.49385	-3.02645	0.00247445	0.0382907
ArasteEVm000876t1	158.597	-4.52447	1.53695	-2.94379	0.00324219	0.045573
ArasteEVm011625t1	28.0435	-4.52684	1.32799	-3.4088	0.000652489	0.0154487
ArasteEVm001245t2	81.7629	-4.53112	1.42003	-3.19086	0.00141849	0.0265579
ArasteEVm069512t3	20.2573	-4.53774	1.46336	-3.1009	0.00192934	0.0324547
ArasteEVm000516t5	136.626	-4.53864	1.21334	-3.74063	0.00018356	0.00640539
ArasteEVm003999t2	30.3105	-4.54155	1.37115	-3.31223	0.000925569	0.0198518
ArasteEVm007335t1	3052.28	-4.54393	1.09669	-4.14331	3.42325e-05	0.00189424
ArasteEVm000656t3	307.649	-4.54508	1.17806	-3.8581	0.000114271	0.0046232
ArasteEVm017703t1	16.5413	-4.55301	1.45867	-3.12135	0.00180026	0.030964
ArasteEVm011500t1	671.965	-4.55323	1.45158	-3.13675	0.00170831	0.0299223
ArasteEVm069203t1	28.6628	-4.56117	1.35687	-3.36153	0.000775129	0.0174874
ArasteEVm045654t1	142.109	-4.56169	0.638424	-7.14524	8.98404e-13	2.5613e-09
ArasteEVm001411t5	57.1901	-4.56342	1.42521	-3.20194	0.00136507	0.0258134
ArasteEVm007946t1	25.645	-4.56968	1.41533	-3.2287	0.00124355	0.0242276
ArasteEVm000794t4	41.545	-4.57246	1.34713	-3.39423	0.000688228	0.0160056
ArasteEVm015580t1	20.438	-4.57497	1.45711	-3.13976	0.00169089	0.0297461
ArasteEVm019641t1	12.8101	-4.57798	1.50335	-3.04519	0.00232535	0.0366854
ArasteEVm009656t1	37.3527	-4.58448	1.23772	-3.70398	0.000212245	0.00710944
ArasteEVm030607t1	476.656	-4.58636	1.16984	-3.92051	8.83606e-05	0.00384743
ArasteEVm006005t5	36.9898	-4.58802	1.48623	-3.08701	0.00202178	0.0334314
ArasteEVm016159t5	20.6538	-4.59169	1.38199	-3.32251	0.000892103	0.0193107
ArasteEVm005359t4	97.2904	-4.59227	1.24233	-3.69648	0.000218607	0.00727678
ArasteEVm028095t1	12.9634	-4.59633	1.48633	-3.0924	0.00198547	0.0330793
ArasteEVm008896t1	42.9713	-4.59843	1.18024	-3.89619	9.77182e-05	0.00413264
ArasteEVm003149t2	73.7498	-4.60193	1.39135	-3.30753	0.000941227	0.0200693
ArasteEVm009923t7	42.6657	-4.60452	1.56383	-2.94439	0.00323592	0.0455377
ArasteEVm007900t1	10849.2	-4.60633	1.10088	-4.18422	2.86143e-05	0.00166685
ArasteEVm002436t8	37.7464	-4.60914	1.329	-3.46813	0.0005241	0.0134184
ArasteEVm070110t1	10.2726	-4.60963	1.55454	-2.96527	0.00302421	0.0436484
ArasteEVm050254t1	17.1752	-4.61169	1.51948	-3.03505	0.00240494	0.0375267
ArasteEVm006342t1	45.751	-4.61442	1.54966	-2.9777	0.00290421	0.0424601
ArasteEVm002280t9	50.0516	-4.61646	1.39965	-3.2983	0.000972733	0.0205333
ArasteEVm005635t7	98.8437	-4.61843	1.49338	-3.0926	0.00198413	0.0330707
ArasteEVm007927t3	29.8396	-4.62108	1.3429	-3.44111	0.000579329	0.014362
ArasteEVm008838t3	72.3597	-4.63531	1.25569	-3.69145	0.00022298	0.00737653
ArasteEVm004549t6	29.9912	-4.63762	1.46974	-3.1554	0.00160281	0.0288244
ArasteEVm000608t2	467.576	-4.63796	1.2289	-3.77407	0.000160608	0.00583072
ArasteEVm024681t1	1108.5	-4.64229	0.983514	-4.7201	2.35726e-06	0.000246222
ArasteEVm002255t3	121.157	-4.64257	1.47488	-3.14777	0.00164521	0.0293116
ArasteEVm004564t4	337.307	-4.64483	1.29546	-3.58546	0.000336484	0.0098253
ArasteEVm042782t1	34.4648	-4.64613	1.38711	-3.3495	0.000809575	0.0179986
ArasteEVm060482t1	13.5266	-4.6522	1.52948	-3.04169	0.0023525	0.0369703
ArasteEVm001568t3	140.78	-4.65259	1.11502	-4.17263	3.01102e-05	0.00171559
ArasteEVm015446t4	47.2907	-4.65623	1.36562	-3.40961	0.000650555	0.015418
ArasteEVm002580t1	3880.26	-4.65742	0.997292	-4.67007	3.01099e-06	0.000295406
ArasteEVm063558t1	21.8852	-4.66581	1.51836	-3.07293	0.00211968	0.03459
ArasteEVm001897t1	34.6225	-4.66597	1.57715	-2.95849	0.00309154	0.0443148
ArasteEVm019336t3	30.8808	-4.66601	1.2871	-3.6252	0.000288735	0.00875163
ArasteEVm025637t1	16.2614	-4.66636	1.58312	-2.94756	0.00320293	0.0452011
ArasteEVm013310t2	21.9108	-4.6704	1.50016	-3.11327	0.00185027	0.0314981
ArasteEVm019670t1	17.9137	-4.67266	1.57862	-2.95997	0.00307671	0.0441563
ArasteEVm015388t2	13.6522	-4.67314	1.52516	-3.06403	0.00218374	0.035338
ArasteEVm014727t7	26.6552	-4.6754	1.40018	-3.33914	0.000840384	0.0184968
ArasteEVm004305t3	26.6588	-4.67869	1.43463	-3.26125	0.00110921	0.0226069
ArasteEVm004264t6	18.2427	-4.68394	1.36792	-3.42412	0.000616783	0.0148722
ArasteEVm026858t1	9.50962	-4.68688	1.44893	-3.23472	0.00121763	0.0239504
ArasteEVm011356t4	14.0393	-4.68983	1.3642	-3.4378	0.000586458	0.0144354
ArasteEVm010664t2	33.7821	-4.69477	1.47489	-3.18313	0.00145694	0.0269429
ArasteEVm011785t1	98.0445	-4.69608	1.31891	-3.56056	0.000370061	0.0105316
ArasteEVm061130t2	40.5341	-4.70247	1.1292	-4.16442	3.12143e-05	0.0017645
ArasteEVm016288t1	50.9998	-4.71339	1.23894	-3.80436	0.00014217	0.00542125
ArasteEVm008680t1	236.23	-4.71684	1.4036	-3.36054	0.000777906	0.0175114
ArasteEVm000261t3	52.2338	-4.72617	1.58182	-2.98781	0.00280984	0.0415442
ArasteEVm052518t1	18.7401	-4.72727	1.39204	-3.39594	0.00068393	0.0159746
ArasteEVm036079t1	32.2786	-4.7293	1.28707	-3.67447	0.000238345	0.00773949
ArasteEVm000812t6	68.3333	-4.72952	1.12097	-4.21914	2.45234e-05	0.00148944
ArasteEVm000706t5	119.618	-4.73007	1.57442	-3.00432	0.00266172	0.0401378
ArasteEVm003125t1	28.5508	-4.73082	1.37381	-3.44357	0.000574091	0.0142737
ArasteEVm001625t1	22.7423	-4.73094	1.46794	-3.22284	0.00126928	0.0245381
ArasteEVm020556t2	9.71523	-4.73548	1.54789	-3.05931	0.00221846	0.0356261
ArasteEVm020203t1	28.0565	-4.73686	1.24594	-3.80182	0.000143634	0.00545563
ArasteEVm007480t1	63.0641	-4.73732	1.44853	-3.27043	0.00107382	0.0220525
ArasteEVm009322t3	14.3169	-4.73908	1.44086	-3.28906	0.00100523	0.02103
ArasteEVm058062t1	22.0052	-4.73913	1.57884	-3.00166	0.00268513	0.0403152
ArasteEVm003026t3	18.898	-4.74519	1.43349	-3.31024	0.000932155	0.0199461
ArasteEVm014446t1	91.8625	-4.74697	1.04258	-4.55311	5.28582e-06	0.000457469
ArasteEVm003131t4	72.2766	-4.74708	1.50255	-3.15935	0.00158123	0.0285636
ArasteEVm009164t7	29.1191	-4.7535	1.45547	-3.26594	0.001091	0.0223044
ArasteEVm016764t2	29.0994	-4.75479	1.45871	-3.25958	0.00111579	0.022667
ArasteEVm001813t8	11.2578	-4.75544	1.53092	-3.10626	0.00189472	0.0320868
ArasteEVm051823t3	9.90868	-4.75831	1.57569	-3.01983	0.00252914	0.0389055
ArasteEVm007787t3	50.8317	-4.76141	1.33551	-3.56523	0.00036354	0.0104072
ArasteEVm000922t1	37.7039	-4.77646	1.33676	-3.57315	0.000352707	0.010157
ArasteEVm001706t3	53.9673	-4.7798	1.3816	-3.45962	0.000540947	0.0136763
ArasteEVm003884t2	47.853	-4.78181	1.36402	-3.50569	0.000455433	0.0121214
ArasteEVm000808t7	153.793	-4.78203	1.23075	-3.88545	0.000102141	0.00428605
ArasteEVm018876t2	42.6502	-4.79038	1.36986	-3.49698	0.000470552	0.0124007
ArasteEVm004793t1	15.066	-4.79703	1.34749	-3.55997	0.000370891	0.0105491
ArasteEVm000443t4	337.994	-4.80095	1.15918	-4.14167	3.44789e-05	0.00189677
ArasteEVm024108t1	29.3196	-4.80228	1.2579	-3.8177	0.0001347	0.00522118
ArasteEVm018382t3	17.72	-4.80535	1.45292	-3.30737	0.000941762	0.0200719
ArasteEVm031153t1	19.8264	-4.81655	1.42157	-3.38818	0.000703584	0.0162924
ArasteEVm003737t3	74.772	-4.81945	1.13635	-4.24117	2.22362e-05	0.00139961
ArasteEVm008680t2	291.128	-4.82119	1.26922	-3.79855	0.000145544	0.00548091
ArasteEVm020854t1	17.9905	-4.82322	1.46698	-3.28786	0.00100951	0.0210621
ArasteEVm014146t1	19.9114	-4.82335	1.44072	-3.34788	0.000814336	0.0180738
ArasteEVm002162t1	263.368	-4.82515	1.57141	-3.07059	0.00213636	0.0347803
ArasteEVm000632t3	99.7607	-4.82767	1.53647	-3.14204	0.00167773	0.0296758
ArasteEVm013677t4	20.2608	-4.83092	1.2992	-3.71839	0.0002005	0.00682404
ArasteEVm003608t2	105.274	-4.83648	1.42065	-3.40441	0.000663071	0.0156033
ArasteEVm001191t2	148.522	-4.84581	1.51092	-3.2072	0.00134034	0.0254749
ArasteEVm003676t1	147.477	-4.85048	1.1201	-4.3304	1.48842e-05	0.00103497
ArasteEVm063160t1	82.8168	-4.86191	1.55881	-3.11899	0.00181474	0.0311119
ArasteEVm020776t1	31.2335	-4.86425	1.35221	-3.59726	0.000321584	0.00948046
ArasteEVm012569t1	15.6636	-4.86708	1.44993	-3.35677	0.000788597	0.0176863
ArasteEVm004364t4	236.725	-4.86955	1.15256	-4.22498	2.38967e-05	0.00146605
ArasteEVm018386t5	360.325	-4.87824	1.61566	-3.01935	0.00253317	0.0389055
ArasteEVm002735t1	2274.16	-4.89558	1.02753	-4.76444	1.89382e-06	0.000206261
ArasteEVm003683t3	105.56	-4.9074	1.25482	-3.91083	9.19804e-05	0.00395908
ArasteEVm011434t2	26.0602	-4.90838	1.46614	-3.34783	0.000814473	0.0180738
ArasteEVm013654t1	17.0357	-4.91202	1.39107	-3.53112	0.000413803	0.0113307
ArasteEVm029459t1	79.8093	-4.91532	1.1219	-4.38126	1.17997e-05	0.000857399
ArasteEVm058453t1	16.1166	-4.91685	1.47458	-3.3344	0.000854823	0.0187211
ArasteEVm012036t3	11.1012	-4.92584	1.57488	-3.12777	0.00176141	0.0305105
ArasteEVm000800t5	25.2363	-4.93762	1.57933	-3.12641	0.00176956	0.0305938
ArasteEVm015234t2	68.7883	-4.93838	1.09399	-4.51412	6.35796e-06	0.000529459
ArasteEVm002833t5	60.4461	-4.94933	1.35072	-3.66423	0.000248084	0.00794162
ArasteEVm010227t4	23.1226	-4.95843	1.26522	-3.91901	8.89132e-05	0.00385789
ArasteEVm002293t15	11.3885	-4.96011	1.45837	-3.40113	0.000671087	0.0157353
ArasteEVm034221t2	16.675	-4.96011	1.44353	-3.43609	0.000590178	0.0144828
ArasteEVm045674t1	32.0854	-4.96883	1.33117	-3.73266	0.000189465	0.0065405
ArasteEVm022959t1	27.5332	-4.96974	1.28985	-3.85297	0.000116696	0.00469817
ArasteEVm029650t1	68.7614	-4.97316	1.61039	-3.08818	0.00201387	0.0333577
ArasteEVm009124t7	53.4083	-4.97675	1.48507	-3.35119	0.000804655	0.0179468
ArasteEVm000227t5	32.3457	-4.97892	1.3119	-3.7952	0.000147524	0.00554254
ArasteEVm000684t1	401.553	-4.97974	1.68607	-2.95346	0.00314237	0.0447409
ArasteEVm012611t3	11.5101	-4.9889	1.59446	-3.1289	0.00175463	0.0304693
ArasteEVm033141t1	132.487	-4.99175	1.52565	-3.27188	0.00106836	0.0219683
ArasteEVm017767t3	25.6877	-4.99299	1.1698	-4.26825	1.9701e-05	0.00127608
ArasteEVm012501t1	64.9491	-4.99655	1.32589	-3.76844	0.000164271	0.00592376
ArasteEVm026480t1	49.3473	-5.00058	1.3017	-3.84158	0.000122245	0.00487699
ArasteEVm004808t1	20.1731	-5.001	1.37994	-3.62408	0.000289995	0.0087843
ArasteEVm025455t1	11.6425	-5.00803	1.66335	-3.0108	0.00260556	0.0396363
ArasteEVm010364t1	357.961	-5.01159	1.21519	-4.12412	3.72155e-05	0.00201529
ArasteEVm001029t6	60.2091	-5.01221	1.38226	-3.62611	0.000287727	0.00874806
ArasteEVm002528t3	118.684	-5.01407	1.4668	-3.41836	0.00062999	0.0150352
ArasteEVm001054t2	134.92	-5.01756	1.48763	-3.37285	0.000743939	0.0169914
ArasteEVm008337t2	23.1184	-5.02362	1.29292	-3.8855	0.000102119	0.00428605
ArasteEVm031407t2	11.8004	-5.02565	1.59393	-3.15299	0.00161606	0.0289896
ArasteEVm042032t1	44.8608	-5.02729	1.37788	-3.64857	0.000263702	0.00827222
ArasteEVm005636t4	201.369	-5.03635	1.56595	-3.21617	0.00129912	0.0249162
ArasteEVm003766t4	39.4189	-5.03862	1.43308	-3.51592	0.000438225	0.0117831
ArasteEVm018964t1	21.0822	-5.04861	1.60711	-3.14142	0.00168131	0.0296758
ArasteEVm005189t8	77.9526	-5.04905	1.44667	-3.49013	0.000482789	0.0126344
ArasteEVm001029t10	45.4444	-5.05095	1.34934	-3.74328	0.00018163	0.00636047
ArasteEVm010493t3	57.6534	-5.05664	1.33666	-3.78303	0.000154931	0.0057117
ArasteEVm009224t5	23.4533	-5.06073	1.42057	-3.56248	0.000367373	0.0104921
ArasteEVm002688t2	51.4666	-5.07083	1.42738	-3.55255	0.000381523	0.0107505
ArasteEVm030650t1	36.2792	-5.08882	1.28872	-3.94873	7.85661e-05	0.00352246
ArasteEVm000095t4	74.7572	-5.10353	1.35468	-3.76733	0.000165002	0.0059457
ArasteEVm039833t1	30.4452	-5.10845	1.22848	-4.15837	3.20529e-05	0.00179592
ArasteEVm002281t2	52.7662	-5.1089	1.45376	-3.51426	0.000440986	0.0118343
ArasteEVm034013t2	59.915	-5.11155	1.39331	-3.66864	0.000243846	0.00784224
ArasteEVm001815t1	284.27	-5.11299	1.11559	-4.58324	4.5783e-06	0.000408641
ArasteEVm095718t1	14.5043	-5.11446	1.60675	-3.1831	0.00145705	0.0269429
ArasteEVm004135t2	121.587	-5.11484	1.4755	-3.46651	0.000527269	0.0134853
ArasteEVm003542t3	267.4	-5.115	1.31653	-3.88521	0.000102242	0.00428655
ArasteEVm004322t5	104.549	-5.11843	1.45233	-3.52429	0.000424618	0.0115034
ArasteEVm015505t1	18.3711	-5.12586	1.65068	-3.1053	0.00190088	0.0321003
ArasteEVm017897t4	111.242	-5.12899	1.38792	-3.69544	0.000219507	0.00729671
ArasteEVm007305t2	68.5239	-5.13003	1.44723	-3.54472	0.000393026	0.0109665
ArasteEVm007348t2	30.068	-5.13544	1.5467	-3.32025	0.000899382	0.0194076
ArasteEVm054950t1	12.8154	-5.13772	1.5684	-3.27577	0.00105374	0.0217415
ArasteEVm034117t1	48.4493	-5.13789	1.27135	-4.0413	5.31551e-05	0.00265316
ArasteEVm038995t1	18.9381	-5.16473	1.67698	-3.07978	0.00207156	0.0340456
ArasteEVm011667t3	30.1616	-5.16818	1.34798	-3.83401	0.00012607	0.00496756
ArasteEVm026728t1	15.0779	-5.16833	1.6956	-3.04808	0.00230307	0.0365012
ArasteEVm005744t5	55.1288	-5.16949	1.3855	-3.73114	0.000190614	0.00655809
ArasteEVm007904t1	38.9792	-5.17325	1.29653	-3.99009	6.60489e-05	0.00313222
ArasteEVm013422t3	13.1473	-5.18697	1.59462	-3.2528	0.00114273	0.0230573
ArasteEVm020042t1	23.1149	-5.18791	1.56107	-3.32331	0.000889575	0.0192646
ArasteEVm065768t1	15.1318	-5.19089	1.51772	-3.42019	0.000625777	0.0149702
ArasteEVm017765t5	61.9783	-5.1944	1.44091	-3.60495	0.000312218	0.00929481
ArasteEVm020553t1	91.628	-5.20397	1.66361	-3.12811	0.00175936	0.0305105
ArasteEVm002644t4	50.495	-5.226	1.69197	-3.08871	0.00201025	0.0333204
ArasteEVm008250t1	5685.31	-5.23527	1.01423	-5.16182	2.44555e-07	3.99077e-05
ArasteEVm003049t4	20.0843	-5.24555	1.56243	-3.3573	0.000787089	0.0176765
ArasteEVm058822t1	26.5983	-5.24603	1.44046	-3.64191	0.000270626	0.00843482
ArasteEVm009463t4	257.329	-5.2466	1.58851	-3.30284	0.000957105	0.0202918
ArasteEVm012227t1	32.9554	-5.24809	1.4237	-3.68624	0.000227589	0.00747952
ArasteEVm035542t1	77.1471	-5.257	1.03687	-5.07009	3.97623e-07	5.66801e-05
ArasteEVm009525t4	13.8543	-5.25838	1.61538	-3.2552	0.00113314	0.0229211
ArasteEVm014405t1	32.907	-5.26873	1.53388	-3.4349	0.000592763	0.0145242
ArasteEVm017235t1	46.0121	-5.27162	1.54671	-3.40827	0.000653754	0.0154636
ArasteEVm023331t1	24.3886	-5.27451	1.45479	-3.62563	0.000288257	0.00874806
ArasteEVm026122t5	16.2245	-5.29934	1.47187	-3.60041	0.000317714	0.00939389
ArasteEVm009224t1	32.4877	-5.3106	1.50479	-3.52912	0.000416938	0.0113774
ArasteEVm000792t1	193.371	-5.31165	1.27622	-4.16203	3.15427e-05	0.00177555
ArasteEVm003332t4	61.1602	-5.31406	1.27702	-4.16129	3.16449e-05	0.00177924
ArasteEVm065714t1	44.6546	-5.3184	1.22069	-4.35688	1.31929e-05	0.000936176
ArasteEVm003164t1	284.078	-5.3194	1.11435	-4.77354	1.81011e-06	0.000200284
ArasteEVm000923t7	25.2333	-5.33036	1.40894	-3.78323	0.000154805	0.0057117
ArasteEVm057074t1	328.889	-5.33629	1.28123	-4.16499	3.11363e-05	0.00176291
ArasteEVm008866t1	16.4565	-5.34934	1.56213	-3.42438	0.000616197	0.0148654
ArasteEVm008640t5	79.7809	-5.34992	1.52507	-3.50799	0.0004515	0.0120498
ArasteEVm003504t1	26.0648	-5.3582	1.61919	-3.30918	0.00093571	0.0200133
ArasteEVm058232t3	43.746	-5.36071	1.31522	-4.0759	4.58375e-05	0.00236085
ArasteEVm000744t3	137.619	-5.36851	1.44464	-3.71615	0.000202282	0.00686061
ArasteEVm006284t5	63.5917	-5.38278	1.4585	-3.69062	0.000223706	0.00738565
ArasteEVm000810t4	41.6511	-5.40529	1.23196	-4.38755	1.14635e-05	0.000841342
ArasteEVm001403t1	26.4742	-5.40669	1.31683	-4.10585	4.02835e-05	0.00215168
ArasteEVm008909t1	37.3346	-5.41074	1.24467	-4.34713	1.37928e-05	0.000973048
ArasteEVm015142t6	98.5397	-5.4133	1.02604	-5.27594	1.32075e-07	2.35337e-05
ArasteEVm023730t1	8.9726	-5.41582	1.67691	-3.22964	0.00123948	0.0241741
ArasteEVm002227t1	187.384	-5.41729	1.59568	-3.39498	0.000686344	0.01599
ArasteEVm021319t1	17.9243	-5.41935	1.72997	-3.13262	0.00173251	0.0302042
ArasteEVm002272t2	112.187	-5.4206	1.60976	-3.36734	0.000758972	0.0172373
ArasteEVm016280t1	51.8112	-5.42541	1.29259	-4.1973	2.70115e-05	0.00160434
ArasteEVm026581t3	23.615	-5.42699	1.85914	-2.91909	0.00351053	0.0483356
ArasteEVm000975t3	439.322	-5.44281	1.21257	-4.48864	7.16778e-06	0.000585824
ArasteEVm055642t1	15.9613	-5.4563	1.54716	-3.52666	0.000420838	0.0114397
ArasteEVm000719t3	133.029	-5.46618	1.1827	-4.62179	3.80451e-06	0.000353237
ArasteEVm028454t2	27.9041	-5.47835	1.36842	-4.00342	6.24333e-05	0.00301684
ArasteEVm000351t5	209.971	-5.4797	1.16184	-4.7164	2.40055e-06	0.000249133
ArasteEVm040588t1	38.7627	-5.48061	1.398	-3.92031	8.84339e-05	0.00384743
ArasteEVm012764t1	28.41	-5.48618	1.59941	-3.43013	0.000603297	0.0146637
ArasteEVm013370t3	68.3747	-5.4875	1.4436	-3.80125	0.000143967	0.00546399
ArasteEVm019965t8	23.7348	-5.48954	1.55409	-3.53231	0.000411943	0.0113246
ArasteEVm004290t1	62.5169	-5.51696	1.33708	-4.12614	3.68905e-05	0.00199993
ArasteEVm000517t1	575.344	-5.52551	1.61204	-3.42765	0.000608822	0.0147456
ArasteEVm041617t2	124.619	-5.533	1.1603	-4.76861	1.85503e-06	0.000204331
ArasteEVm001757t4	154.815	-5.54153	1.47576	-3.75503	0.000173322	0.00615852
ArasteEVm036551t3	28.5716	-5.5491	1.57057	-3.53318	0.000410599	0.0113005
ArasteEVm006446t1	49.7068	-5.55383	1.25753	-4.41644	1.00337e-05	0.000763627
ArasteEVm074268t1	9.88304	-5.55748	1.66385	-3.34014	0.000837372	0.0184473
ArasteEVm005314t4	33.4926	-5.56403	1.28134	-4.34235	1.40966e-05	0.000985868
ArasteEVm031975t1	30.3714	-5.56601	1.87281	-2.97201	0.00295853	0.0429563
ArasteEVm059448t1	10.0623	-5.57216	1.63636	-3.40522	0.000661119	0.0155845
ArasteEVm000398t1	197.997	-5.57426	1.34032	-4.15891	3.19775e-05	0.00179378
ArasteEVm006002t2	175.132	-5.57857	1.13292	-4.92407	8.47606e-07	0.000105876
ArasteEVm000105t6	81.5237	-5.5916	1.36839	-4.08627	4.38355e-05	0.00229184
ArasteEVm001811t5	94.6087	-5.60324	1.40567	-3.98615	6.71527e-05	0.00316582
ArasteEVm000812t10	34.6462	-5.60731	1.23525	-4.53942	5.6408e-06	0.00048047
ArasteEVm000936t6	50.8937	-5.609	1.23183	-4.55339	5.27877e-06	0.000457469
ArasteEVm004821t2	50.3253	-5.61368	1.88669	-2.97542	0.0029259	0.0426486
ArasteEVm030683t3	10.4201	-5.62241	1.70459	-3.2984	0.000972387	0.0205333
ArasteEVm013363t4	52.2842	-5.62642	1.27399	-4.41638	1.00365e-05	0.000763627
ArasteEVm003317t2	60.2571	-5.63932	1.21805	-4.62978	3.66053e-06	0.000344488
ArasteEVm000687t4	21.0089	-5.6403	1.89611	-2.97467	0.00293305	0.0427271
ArasteEVm015898t1	10.5876	-5.64933	1.70438	-3.3146	0.000917731	0.0197245
ArasteEVm047217t1	19.4717	-5.65801	1.4744	-3.8375	0.000124292	0.00493361
ArasteEVm017079t1	39.5311	-5.66005	1.22419	-4.6235	3.77324e-06	0.00035168
ArasteEVm008971t2	35.5716	-5.67229	1.45417	-3.90071	9.5912e-05	0.00408837
ArasteEVm016488t2	52.2929	-5.67404	1.52497	-3.72076	0.000198624	0.00676969
ArasteEVm005879t1	32.0667	-5.68024	1.39383	-4.07529	4.59567e-05	0.00236448
ArasteEVm007157t1	21.1837	-5.68943	1.51243	-3.76179	0.000168699	0.00603406
ArasteEVm006717t4	36.9003	-5.69441	1.21758	-4.67684	2.9133e-06	0.000289336
ArasteEVm003051t3	77.7129	-5.69538	1.93163	-2.94848	0.00319338	0.0451307
ArasteEVm000171t2	216.035	-5.70187	1.50929	-3.77785	0.000158189	0.00577755
ArasteEVm025372t1	299.048	-5.71051	1.57989	-3.61449	0.00030094	0.00902
ArasteEVm000357t3	45.6454	-5.72916	1.92993	-2.96858	0.00299176	0.0433018
ArasteEVm001577t1	126.879	-5.73492	1.37373	-4.17471	2.9837e-05	0.00170603
ArasteEVm004297t2	32.5427	-5.74463	1.45197	-3.95645	7.6073e-05	0.00344897
ArasteEVm036586t1	19.8287	-5.76465	1.46191	-3.94323	8.03913e-05	0.00359432
ArasteEVm003552t10	57.9324	-5.76949	1.34038	-4.30438	1.67451e-05	0.00113348
ArasteEVm004575t1	109.867	-5.77192	1.44751	-3.98749	6.6776e-05	0.00315743
ArasteEVm000041t2	413.416	-5.77215	1.54758	-3.72979	0.000191641	0.00657759
ArasteEVm050121t1	19.9677	-5.78667	1.537	-3.7649	0.000166616	0.00597279
ArasteEVm002250t2	107.816	-5.79362	1.41603	-4.09146	4.28674e-05	0.00225582
ArasteEVm010487t2	181.542	-5.79647	1.48132	-3.91304	9.11406e-05	0.00392991
ArasteEVm027464t1	44.7093	-5.79689	1.36197	-4.25625	2.07887e-05	0.00132922
ArasteEVm008463t3	47.1914	-5.79689	1.50094	-3.86217	0.000112384	0.00458975
ArasteEVm008685t4	83.4574	-5.79866	1.33994	-4.32755	1.50775e-05	0.00104162
ArasteEVm070016t2	20.1347	-5.80154	1.56871	-3.69829	0.000217055	0.00724004
ArasteEVm000330t7	52.9021	-5.80486	1.15489	-5.02632	4.99974e-07	6.82584e-05
ArasteEVm034397t2	11.7268	-5.80515	1.96849	-2.94904	0.00318759	0.0450671
ArasteEVm000908t1	47.3179	-5.80674	1.42875	-4.06421	4.81948e-05	0.00245875
ArasteEVm001863t2	143.597	-5.81489	1.00804	-5.76851	7.99772e-09	2.01884e-06
ArasteEVm017130t3	23.9959	-5.83038	1.93577	-3.01192	0.00259599	0.0395652
ArasteEVm047688t1	23.5622	-5.83077	1.60739	-3.62748	0.000286198	0.00873482
ArasteEVm004035t1	11.9767	-5.83864	1.7121	-3.41023	0.000649079	0.0153981
ArasteEVm001367t1	363.78	-5.84089	1.54787	-3.77349	0.000160977	0.00583975
ArasteEVm001026t1	52.0041	-5.84178	1.27219	-4.5919	4.3922e-06	0.000395675
ArasteEVm004083t2	35.8066	-5.84306	1.35918	-4.29897	1.71593e-05	0.00114709
ArasteEVm016277t5	12.0016	-5.84424	1.81823	-3.21425	0.00130787	0.0250146
ArasteEVm001990t3	75.1785	-5.85243	2.00412	-2.9202	0.00349803	0.0482733
ArasteEVm017334t2	12.2492	-5.86622	1.56266	-3.75399	0.000174039	0.00617532
ArasteEVm012742t1	31.7002	-5.88157	1.32718	-4.43161	9.35306e-06	0.000727617
ArasteEVm007987t2	97.4988	-5.88717	1.99945	-2.9444	0.00323579	0.0455377
ArasteEVm013764t2	50.9335	-5.89403	1.54693	-3.81016	0.000138878	0.00534194
ArasteEVm009463t5	128.376	-5.89419	1.73645	-3.3944	0.000687788	0.016003
ArasteEVm006466t4	342.772	-5.89669	1.71496	-3.43837	0.000585218	0.0144195
ArasteEVm009551t1	42.7307	-5.91888	1.28599	-4.60258	4.17294e-06	0.000380877
ArasteEVm015932t2	22.159	-5.9217	1.40421	-4.2171	2.47462e-05	0.00150106
ArasteEVm021782t1	12.7375	-5.92654	1.67487	-3.53851	0.000402395	0.0111443
ArasteEVm060171t3	25.2122	-5.93844	1.51376	-3.92299	8.74577e-05	0.00381867
ArasteEVm018876t1	22.5347	-5.94714	1.42101	-4.18514	2.84992e-05	0.00166215
ArasteEVm033256t1	12.997	-5.95465	2.00151	-2.97508	0.00292909	0.0426823
ArasteEVm023765t3	22.6967	-5.95811	1.41703	-4.20464	2.61494e-05	0.00157045
ArasteEVm004979t2	22.5237	-5.95854	1.52015	-3.91969	8.86622e-05	0.00385045
ArasteEVm002361t2	103.921	-5.96442	1.22146	-4.88304	1.04464e-06	0.000125632
ArasteEVm068765t2	13.2819	-5.98013	1.5924	-3.75542	0.000173048	0.0061533
ArasteEVm001429t2	231.519	-5.99182	1.49403	-4.01051	6.05871e-05	0.00294687
ArasteEVm013675t2	361.928	-5.99207	1.70604	-3.51226	0.00044431	0.0119104
ArasteEVm029904t1	13.3265	-5.99235	1.63045	-3.67528	0.00023759	0.00772823
ArasteEVm008841t1	13.4303	-5.99975	1.93722	-3.0971	0.00195427	0.032777
ArasteEVm004502t1	118.592	-6.00198	1.35514	-4.42904	9.46534e-06	0.000732823
ArasteEVm000002t5	44.3041	-6.03013	2.01512	-2.99245	0.00276751	0.0411317
ArasteEVm007731t3	41.339	-6.03959	1.50534	-4.01212	6.0177e-05	0.0029312
ArasteEVm002718t3	23.0932	-6.04082	1.89474	-3.1882	0.0014316	0.0267073
ArasteEVm040289t1	55.8499	-6.04875	1.42348	-4.24927	2.14469e-05	0.00135698
ArasteEVm057068t1	14.0351	-6.06145	1.78467	-3.3964	0.00068279	0.0159557
ArasteEVm001419t2	365.397	-6.06486	1.54078	-3.93622	8.27762e-05	0.00367014
ArasteEVm002324t6	48.3002	-6.09683	1.28665	-4.73852	2.15287e-06	0.000226336
ArasteEVm024551t2	14.3991	-6.10793	2.01619	-3.02944	0.00245011	0.0379991
ArasteEVm002667t4	58.6091	-6.12138	1.9465	-3.14481	0.00166192	0.0294611
ArasteEVm021493t1	59.7421	-6.12715	1.76798	-3.46563	0.000528993	0.0135223
ArasteEVm005920t1	14.7626	-6.14136	1.62295	-3.78408	0.000154276	0.0057117
ArasteEVm005961t1	61.2124	-6.18154	1.87508	-3.29668	0.000978343	0.0206158
ArasteEVm001525t1	46.1846	-6.19185	1.62082	-3.82019	0.000133348	0.00518688
ArasteEVm005871t3	50.6894	-6.19199	1.49117	-4.15245	3.28934e-05	0.00183033
ArasteEVm022703t3	15.3129	-6.19361	1.60461	-3.8599	0.000113435	0.00460832
ArasteEVm039963t1	15.3097	-6.19412	2.04682	-3.02622	0.00247629	0.0382987
ArasteEVm006002t6	29.8184	-6.19445	1.404	-4.41201	1.02414e-05	0.000774349
ArasteEVm040209t1	31.1471	-6.20281	2.04594	-3.03177	0.00243123	0.0378273
ArasteEVm058141t1	64.5508	-6.20513	1.22276	-5.0747	3.88118e-07	5.58176e-05
ArasteEVm000115t2	62.7955	-6.21598	1.46064	-4.25566	2.08432e-05	0.00133094
ArasteEVm000985t9	51.8943	-6.22294	1.45676	-4.27177	1.9393e-05	0.00126331
ArasteEVm015232t5	52.1192	-6.23065	1.50391	-4.14298	3.4282e-05	0.00189454
ArasteEVm010111t1	64.5374	-6.25904	1.90269	-3.28956	0.00100342	0.0210073
ArasteEVm063545t2	27.569	-6.26936	1.64318	-3.81539	0.000135968	0.00525087
ArasteEVm016721t1	31.4402	-6.27998	1.34866	-4.65646	3.21686e-06	0.000311195
ArasteEVm001044t3	52.9644	-6.28057	1.80919	-3.47148	0.000517597	0.0133011
ArasteEVm047736t1	239.631	-6.29965	1.63587	-3.85096	0.000117657	0.00473225
ArasteEVm001698t4	120.129	-6.3038	1.35901	-4.63852	3.50921e-06	0.000332832
ArasteEVm000223t3	120.107	-6.30646	2.06028	-3.06097	0.00220625	0.0354939
ArasteEVm008838t2	27.614	-6.30926	2.00573	-3.14561	0.00165739	0.0294283
ArasteEVm018020t2	16.6709	-6.31229	1.56961	-4.02156	5.78142e-05	0.00283893
ArasteEVm003191t2	94.4527	-6.31405	1.43942	-4.38652	1.15178e-05	0.000842625
ArasteEVm007749t3	66.9074	-6.31552	1.98593	-3.18012	0.00147212	0.0271698
ArasteEVm000199t5	85.7858	-6.31681	1.91503	-3.29854	0.000971897	0.0205333
ArasteEVm019185t1	16.806	-6.3262	1.78827	-3.53762	0.000403751	0.0111636
ArasteEVm012287t3	69.2898	-6.33041	1.4374	-4.40409	1.06231e-05	0.000793309
ArasteEVm000270t1	33.619	-6.33282	1.78548	-3.54684	0.000389884	0.0109163
ArasteEVm000419t1	68.5769	-6.3408	1.51355	-4.18936	2.79737e-05	0.00164336
ArasteEVm013115t2	121.151	-6.34133	1.91823	-3.30582	0.000946976	0.0201564
ArasteEVm021544t1	107.833	-6.34543	2.15029	-2.95096	0.00316784	0.0449583
ArasteEVm001385t3	43.9907	-6.35637	1.31111	-4.84808	1.24662e-06	0.000145587
ArasteEVm006693t1	17.1617	-6.35928	2.10371	-3.02289	0.00250371	0.0386202
ArasteEVm058561t1	8.86506	-6.36823	1.68961	-3.76904	0.000163874	0.00591385
ArasteEVm021624t1	17.2751	-6.36925	1.98754	-3.20459	0.00135256	0.0256568
ArasteEVm015533t10	17.2883	-6.37052	1.54145	-4.13282	3.58334e-05	0.00194916
ArasteEVm013058t4	28.7513	-6.37202	2.06389	-3.08739	0.00201922	0.0334087
ArasteEVm044737t1	8.86554	-6.37308	2.14937	-2.96509	0.00302592	0.04366
ArasteEVm003112t1	8.83251	-6.37334	2.1814	-2.92167	0.0034816	0.0480739
ArasteEVm005051t1	8.83677	-6.37423	2.14123	-2.9769	0.00291174	0.0425182
ArasteEVm000784t35	8.83283	-6.3745	1.712	-3.72342	0.000196544	0.00670825
ArasteEVm028136t1	8.8757	-6.37634	1.65097	-3.86218	0.000112379	0.00458975
ArasteEVm000639t3	8.84027	-6.37684	2.05339	-3.10552	0.00189943	0.0321003
ArasteEVm042028t1	8.90766	-6.37704	1.84075	-3.46438	0.00053146	0.0135567
ArasteEVm009781t1	8.8469	-6.37799	1.82651	-3.4919	0.000479596	0.0125644
ArasteEVm003067t1	8.85483	-6.37839	2.1807	-2.92493	0.00344529	0.0476948
ArasteEVm036530t1	8.84954	-6.37845	2.0715	-3.07915	0.00207595	0.0340716
ArasteEVm020405t1	8.87229	-6.37956	1.96627	-3.2445	0.00117658	0.0234898
ArasteEVm004413t2	126.279	-6.38166	1.44831	-4.40629	1.05157e-05	0.000786504
ArasteEVm026428t3	8.87222	-6.38179	2.13225	-2.99299	0.00276261	0.0410978
ArasteEVm002965t1	8.91035	-6.38202	2.18077	-2.9265	0.00342802	0.0474828
ArasteEVm007381t1	8.88809	-6.38474	2.09268	-3.05099	0.0022809	0.0362684
ArasteEVm022254t1	8.94529	-6.38627	1.88742	-3.38359	0.000715448	0.0165119
ArasteEVm032901t7	8.93998	-6.3868	1.67308	-3.81738	0.000134876	0.00522118
ArasteEVm048708t3	8.96305	-6.38695	1.8928	-3.37434	0.000739917	0.0169315
ArasteEVm043448t2	8.912	-6.38801	2.16425	-2.9516	0.00316133	0.0449373
ArasteEVm009031t1	8.91082	-6.39055	1.70998	-3.73721	0.000186075	0.00646937
ArasteEVm003023t8	8.96429	-6.39098	1.91734	-3.33325	0.00085839	0.0187823
ArasteEVm017092t1	8.95102	-6.39186	2.16718	-2.94938	0.00318407	0.0450436
ArasteEVm013574t1	8.96684	-6.3919	2.12932	-3.00185	0.00268346	0.0403026
ArasteEVm013439t2	9.01481	-6.40134	1.76549	-3.62582	0.000288044	0.00874806
ArasteEVm025457t2	8.99038	-6.4016	2.05475	-3.11552	0.00183622	0.0313691
ArasteEVm024435t1	9.00145	-6.40177	2.19172	-2.92089	0.00349037	0.0481812
ArasteEVm011031t5	9.01271	-6.402	1.61829	-3.95602	7.62091e-05	0.00344973
ArasteEVm009969t1	8.96791	-6.40235	1.74403	-3.671	0.000241605	0.0077892
ArasteEVm011204t1	9.00633	-6.40396	1.90112	-3.36852	0.000755726	0.0172039
ArasteEVm009224t13	9.04744	-6.40444	2.12274	-3.01707	0.00255231	0.0391209
ArasteEVm012773t2	108.226	-6.40497	1.36935	-4.67739	2.90546e-06	0.00028915
ArasteEVm007558t2	9.03815	-6.4055	2.17062	-2.951	0.00316743	0.0449583
ArasteEVm028189t1	9.06968	-6.40576	1.86524	-3.43429	0.000594117	0.0145353
ArasteEVm060726t1	9.09868	-6.4074	1.72138	-3.72224	0.000197466	0.00673498
ArasteEVm030112t1	9.04744	-6.41007	1.67746	-3.8213	0.000132752	0.00516783
ArasteEVm012555t2	9.05503	-6.41101	2.08614	-3.07314	0.00211819	0.034589
ArasteEVm053717t1	9.09641	-6.41322	1.70869	-3.75329	0.000174528	0.00618325
ArasteEVm006594t1	9.06554	-6.41402	2.13579	-3.00311	0.00267234	0.0402104
ArasteEVm006498t1	9.11973	-6.415	2.18078	-2.9416	0.00326521	0.0457984
ArasteEVm017248t1	9.14317	-6.41588	1.80153	-3.56135	0.000368958	0.01052
ArasteEVm010805t3	9.08141	-6.41635	2.12733	-3.01615	0.0025601	0.039166
ArasteEVm030862t1	9.0899	-6.41694	2.04596	-3.13639	0.00171042	0.0299484
ArasteEVm000802t3	35.8592	-6.41898	1.9202	-3.34288	0.000829137	0.0182992
ArasteEVm024441t1	9.08833	-6.41949	1.90773	-3.36498	0.000765488	0.0173418
ArasteEVm001818t1	9.1108	-6.41959	2.13468	-3.00729	0.00263591	0.0398727
ArasteEVm004475t3	9.13228	-6.41964	2.09239	-3.0681	0.00215427	0.0349895
ArasteEVm007697t3	9.13002	-6.42038	2.09819	-3.05996	0.00221365	0.0355961
ArasteEVm005648t1	9.11862	-6.4211	2.14988	-2.98673	0.00281979	0.0416278
ArasteEVm010933t1	9.15532	-6.42188	2.15747	-2.97658	0.00291482	0.0425232
ArasteEVm027000t1	9.09452	-6.4222	1.7788	-3.61042	0.000305702	0.00912887
ArasteEVm051224t1	29.9772	-6.42432	1.97489	-3.25301	0.0011419	0.0230501
ArasteEVm076599t1	9.18343	-6.42659	1.68756	-3.80821	0.000139975	0.00537135
ArasteEVm016694t3	9.22667	-6.42734	1.73395	-3.70677	0.000209917	0.00705048
ArasteEVm015211t1	9.16248	-6.42735	2.10872	-3.04798	0.00230383	0.0365013
ArasteEVm028499t1	9.17013	-6.42906	1.80085	-3.57002	0.000356957	0.010249
ArasteEVm010857t1	18.0188	-6.43042	1.47121	-4.37084	1.2377e-05	0.000887369
ArasteEVm003110t1	9.21053	-6.43107	1.70001	-3.78296	0.000154972	0.0057117
ArasteEVm031115t1	9.17523	-6.43128	2.16122	-2.97577	0.00292253	0.0426123
ArasteEVm027524t1	9.19342	-6.43148	2.17935	-2.9511	0.00316644	0.0449583
ArasteEVm061432t1	9.28138	-6.43523	1.69589	-3.7946	0.000147882	0.00554741
ArasteEVm054142t3	9.24761	-6.43747	2.13499	-3.01523	0.00256789	0.0392445
ArasteEVm008867t1	9.25788	-6.43786	2.18148	-2.95114	0.00316601	0.0449583
ArasteEVm006479t1	9.29205	-6.43832	1.7128	-3.75895	0.000170629	0.00608963
ArasteEVm054930t1	9.22019	-6.43871	2.16934	-2.96805	0.00299698	0.0433457
ArasteEVm002574t5	52.5377	-6.43903	1.5376	-4.18772	2.81768e-05	0.001649
ArasteEVm047266t1	9.2644	-6.4393	2.11433	-3.04556	0.0023225	0.0366771
ArasteEVm005260t1	9.25739	-6.4423	2.18448	-2.94911	0.00318685	0.0450671
ArasteEVm020995t1	9.33529	-6.44247	1.76263	-3.65504	0.00025714	0.00812847
ArasteEVm012931t3	9.27177	-6.44306	2.10422	-3.06197	0.00219887	0.0354407
ArasteEVm006739t6	9.29589	-6.44548	2.19259	-2.93967	0.00328564	0.0460236
ArasteEVm039167t1	18.1852	-6.44579	1.77606	-3.62926	0.000284235	0.00869681
ArasteEVm026865t1	9.31357	-6.4464	1.61411	-3.99377	6.50307e-05	0.00311376
ArasteEVm010257t6	9.27865	-6.44713	2.11847	-3.04329	0.00234004	0.0368222
ArasteEVm007187t1	9.30351	-6.44778	1.60053	-4.02854	5.6125e-05	0.00277284
ArasteEVm038752t1	74.9194	-6.44793	1.99725	-3.2284	0.00124487	0.0242401
ArasteEVm027350t1	9.36447	-6.44893	1.86423	-3.45929	0.000541596	0.0136856
ArasteEVm000812t12	9.31944	-6.45044	1.64108	-3.9306	8.47348e-05	0.00373142
ArasteEVm013053t1	9.33927	-6.45096	1.89381	-3.40635	0.000658388	0.0155428
ArasteEVm013770t1	9.34469	-6.45194	1.59992	-4.03266	5.51494e-05	0.002733
ArasteEVm000318t7	9.34026	-6.45222	2.12658	-3.03408	0.00241272	0.0376044
ArasteEVm002516t1	9.34424	-6.45422	2.16608	-2.97967	0.00288557	0.0422919
ArasteEVm025918t1	9.35371	-6.45741	2.18907	-2.94984	0.00317939	0.0450036
ArasteEVm015144t2	9.40956	-6.45887	2.18829	-2.95156	0.00316173	0.0449373
ArasteEVm015064t4	9.41396	-6.4608	2.14933	-3.00595	0.00264749	0.0399979
ArasteEVm011350t9	9.35686	-6.46127	2.11849	-3.04995	0.00228883	0.0363385
ArasteEVm017534t3	9.37969	-6.46253	2.21579	-2.91658	0.0035389	0.0486019
ArasteEVm006475t3	9.40842	-6.46346	2.15463	-2.99981	0.00270152	0.0405362
ArasteEVm000935t3	46.7037	-6.46527	1.46484	-4.41363	1.0165e-05	0.000770977
ArasteEVm028628t1	9.4375	-6.46778	1.83961	-3.51585	0.000438346	0.0117831
ArasteEVm012092t2	9.4587	-6.4679	1.65501	-3.90806	9.30387e-05	0.00399399
ArasteEVm041613t1	9.41955	-6.46868	1.82606	-3.54243	0.000396451	0.0110259
ArasteEVm002574t9	9.4281	-6.47057	2.08606	-3.10181	0.00192338	0.0323788
ArasteEVm014690t1	9.45972	-6.47228	1.73488	-3.73067	0.00019097	0.00656423
ArasteEVm005087t2	9.48492	-6.47243	1.76683	-3.66329	0.000248993	0.00795498
ArasteEVm023758t1	9.4731	-6.47539	2.12231	-3.0511	0.00228002	0.0362662
ArasteEVm005455t1	36.6133	-6.47593	1.57504	-4.1116	3.92932e-05	0.00211363
ArasteEVm022448t4	9.51242	-6.47787	1.66258	-3.89627	9.76854e-05	0.00413264
ArasteEVm066654t1	9.49207	-6.47816	2.10807	-3.07302	0.00211902	0.03459
ArasteEVm016855t5	9.49582	-6.47875	2.19184	-2.95585	0.00311804	0.0445307
ArasteEVm015892t4	9.52604	-6.48104	2.22384	-2.91435	0.00356433	0.0489046
ArasteEVm010506t4	9.55059	-6.48269	2.20365	-2.9418	0.0032631	0.0457984
ArasteEVm008701t1	9.53563	-6.48423	2.20594	-2.93943	0.00328813	0.0460394
ArasteEVm006618t1	9.55365	-6.48684	2.08955	-3.10442	0.00190654	0.0321542
ArasteEVm035074t2	9.58916	-6.48796	2.19056	-2.96178	0.00305865	0.0439622
ArasteEVm018778t1	9.59875	-6.48921	2.13559	-3.03861	0.00237675	0.0372547
ArasteEVm029470t1	9.56874	-6.48932	2.13802	-3.0352	0.00240378	0.0375267
ArasteEVm077322t1	9.64806	-6.4906	1.71563	-3.78322	0.000154814	0.0057117
ArasteEVm007382t1	9.58497	-6.4912	2.19679	-2.95485	0.00312816	0.044578
ArasteEVm009110t2	9.6194	-6.49154	2.18819	-2.96662	0.00301092	0.0434825
ArasteEVm045302t1	9.61898	-6.49168	1.71935	-3.77565	0.000159591	0.00580342
ArasteEVm059992t1	9.58776	-6.49413	2.1413	-3.0328	0.00242298	0.0377474
ArasteEVm012695t3	9.62033	-6.4942	2.13128	-3.04709	0.00231068	0.0365501
ArasteEVm006496t1	36.5579	-6.49512	1.38843	-4.67803	2.89645e-06	0.000288846
ArasteEVm021033t1	9.63965	-6.49772	1.8506	-3.51114	0.000446194	0.011941
ArasteEVm009157t1	9.66682	-6.49789	1.79987	-3.6102	0.000305966	0.00913112
ArasteEVm013451t1	9.64232	-6.49801	1.72519	-3.76656	0.000165513	0.00595779
ArasteEVm014005t1	9.64479	-6.49818	1.73309	-3.74948	0.000177201	0.00625507
ArasteEVm054941t1	9.73109	-6.50024	1.94126	-3.34847	0.000812579	0.0180571
ArasteEVm009047t1	9.66481	-6.50185	2.10401	-3.09022	0.00200011	0.0332652
ArasteEVm005788t1	9.63844	-6.50246	2.08166	-3.12369	0.00178597	0.0308039
ArasteEVm022587t1	9.64505	-6.50504	1.80671	-3.60048	0.000317627	0.00939389
ArasteEVm020951t1	9.66859	-6.50541	1.97284	-3.29749	0.000975531	0.0205655
ArasteEVm073291t1	9.66058	-6.50576	2.07609	-3.13366	0.00172643	0.0301525
ArasteEVm006805t1	9.65497	-6.50711	1.7745	-3.66702	0.000245396	0.00788003
ArasteEVm001776t1	9.68127	-6.50796	1.77974	-3.65669	0.000255492	0.00810915
ArasteEVm003352t2	9.71924	-6.50965	2.20281	-2.95515	0.00312513	0.0445609
ArasteEVm000784t22	9.72238	-6.50968	2.12199	-3.06772	0.00215698	0.0350101
ArasteEVm034105t1	9.70375	-6.51041	2.12068	-3.06997	0.00214083	0.0348179
ArasteEVm006200t1	9.69716	-6.51057	2.06987	-3.14541	0.00165857	0.029434
ArasteEVm009240t3	9.73321	-6.51092	2.22318	-2.92865	0.00340436	0.0472091
ArasteEVm038713t1	9.71718	-6.51227	2.1464	-3.03404	0.00241302	0.0376044
ArasteEVm033657t1	9.73031	-6.513	2.20773	-2.95009	0.00317681	0.0450021
ArasteEVm022675t1	9.73336	-6.51504	1.72293	-3.78136	0.000155973	0.00572892
ArasteEVm006614t2	9.72347	-6.51566	2.08737	-3.12147	0.00179953	0.030964
ArasteEVm023497t1	9.73901	-6.51648	2.03241	-3.20628	0.00134464	0.0255366
ArasteEVm042008t1	9.81946	-6.5201	2.13402	-3.05531	0.00224825	0.0359141
ArasteEVm014173t5	9.80876	-6.52119	2.17093	-3.00387	0.00266571	0.0401621
ArasteEVm006851t1	9.80097	-6.52196	1.69875	-3.83926	0.000123406	0.00490646
ArasteEVm066515t2	9.81142	-6.52338	2.18498	-2.98556	0.00283062	0.0417523
ArasteEVm017471t2	9.79032	-6.52523	2.05305	-3.1783	0.0014814	0.0272655
ArasteEVm015582t1	9.87733	-6.52593	1.72853	-3.77542	0.000159736	0.00580342
ArasteEVm005027t1	9.83629	-6.52837	2.08903	-3.12507	0.00177765	0.0306931
ArasteEVm014944t2	9.84028	-6.52842	2.21512	-2.94721	0.00320656	0.0452165
ArasteEVm026470t1	9.82743	-6.5285	1.8476	-3.5335	0.000410103	0.0112932
ArasteEVm011435t1	9.8368	-6.52901	2.10813	-3.09706	0.00195447	0.032777
ArasteEVm003519t9	57.8714	-6.52938	1.47399	-4.42973	9.43491e-06	0.000731636
ArasteEVm011568t1	9.86569	-6.53091	2.17072	-3.00864	0.00262418	0.0398247
ArasteEVm003610t1	9.8463	-6.53114	2.16988	-3.00991	0.00261324	0.0397157
ArasteEVm033844t2	9.83463	-6.53124	2.1589	-3.02526	0.00248417	0.0383905
ArasteEVm015297t4	9.85431	-6.53218	2.12056	-3.0804	0.00206724	0.033986
ArasteEVm008740t1	9.84135	-6.53221	2.20801	-2.95841	0.00309232	0.0443148
ArasteEVm001769t1	9.89271	-6.53237	1.73436	-3.76645	0.000165583	0.00595779
ArasteEVm016360t1	9.87621	-6.53256	1.59061	-4.10695	4.00922e-05	0.00214708
ArasteEVm008722t1	9.85444	-6.53363	1.88834	-3.46	0.000540185	0.0136713
ArasteEVm008360t2	9.89433	-6.5365	2.05237	-3.18486	0.00144825	0.0268719
ArasteEVm040581t1	19.4475	-6.53745	1.54802	-4.2231	2.40964e-05	0.00147643
ArasteEVm003913t4	9.89646	-6.53804	2.14654	-3.04584	0.00232028	0.036654
ArasteEVm015786t1	9.94468	-6.54035	2.18893	-2.98792	0.00280887	0.0415424
ArasteEVm013559t1	9.95833	-6.54108	1.65159	-3.96047	7.4803e-05	0.00340413
ArasteEVm014586t1	9.95212	-6.54108	1.86781	-3.50201	0.000461767	0.0122162
ArasteEVm023005t4	9.93563	-6.54128	1.79777	-3.63855	0.000274182	0.00848562
ArasteEVm007466t4	9.96867	-6.54301	2.1041	-3.10964	0.00187314	0.0317982
ArasteEVm005060t1	9.9307	-6.54455	2.18325	-2.99763	0.00272092	0.0406887
ArasteEVm002444t1	9.9532	-6.54474	2.09242	-3.12784	0.00176097	0.0305105
ArasteEVm009680t1	9.9226	-6.54599	2.0882	-3.13476	0.00171997	0.0300729
ArasteEVm031855t1	9.90952	-6.54669	1.71475	-3.81786	0.000134613	0.00522118
ArasteEVm041571t1	9.93891	-6.5467	2.09665	-3.12245	0.00179351	0.030901
ArasteEVm000924t11	9.97745	-6.54808	2.17662	-3.00838	0.00262647	0.0398358
ArasteEVm029984t1	9.95353	-6.54816	2.14333	-3.05513	0.00224964	0.0359245
ArasteEVm018289t1	9.997	-6.54876	2.12782	-3.07768	0.00208616	0.0341696
ArasteEVm028801t1	9.99479	-6.54937	1.74714	-3.74862	0.000177812	0.00626666
ArasteEVm050799t1	10.0296	-6.55008	2.23639	-2.92886	0.00340205	0.047204
ArasteEVm007246t6	9.98315	-6.55054	2.07228	-3.16104	0.00157209	0.0284408
ArasteEVm003793t2	10.0126	-6.55085	1.72568	-3.7961	0.000146991	0.00552681
ArasteEVm056345t1	9.96063	-6.55097	2.13271	-3.07166	0.00212868	0.0346903
ArasteEVm014637t2	9.99103	-6.55116	1.85507	-3.53149	0.000413231	0.0113287
ArasteEVm002919t1	9.99164	-6.55293	2.12951	-3.0772	0.00208956	0.0342022
ArasteEVm010162t1	9.99069	-6.55384	2.11366	-3.10071	0.00193057	0.0324547
ArasteEVm008564t3	10.0129	-6.55686	1.61766	-4.05329	5.05025e-05	0.00255763
ArasteEVm004009t1	10.0191	-6.55712	1.65134	-3.97079	7.16352e-05	0.0033034
ArasteEVm014513t6	10.0901	-6.55798	2.17959	-3.00882	0.00262263	0.039821
ArasteEVm008278t3	10.0605	-6.55969	2.13524	-3.07211	0.00212548	0.0346614
ArasteEVm003581t2	10.0507	-6.5598	2.18692	-2.99956	0.00270369	0.0405562
ArasteEVm020764t3	10.0694	-6.56194	2.14206	-3.06337	0.00218857	0.0353828
ArasteEVm015343t3	32.8259	-6.56282	2.07799	-3.15826	0.00158715	0.0286491
ArasteEVm010889t8	10.0672	-6.56397	2.1997	-2.98403	0.00284479	0.041882
ArasteEVm022620t2	10.1424	-6.56513	1.76026	-3.72963	0.000191764	0.00657759
ArasteEVm018629t9	10.0742	-6.56564	2.06517	-3.17923	0.00147667	0.02722
ArasteEVm001405t5	10.0691	-6.56579	2.03203	-3.23115	0.00123291	0.0241139
ArasteEVm001952t3	10.1058	-6.56751	2.14438	-3.06266	0.00219379	0.0354178
ArasteEVm028963t2	10.1434	-6.5684	2.12061	-3.0974	0.00195224	0.0327735
ArasteEVm014763t2	10.1701	-6.57204	2.10994	-3.11479	0.00184074	0.0314028
ArasteEVm011304t1	10.119	-6.57221	2.05725	-3.19466	0.00139996	0.0262682
ArasteEVm037883t2	10.1618	-6.57345	2.16319	-3.03877	0.00237546	0.0372465
ArasteEVm031819t1	10.1409	-6.57468	2.09911	-3.13212	0.00173546	0.0302231
ArasteEVm003873t1	10.1679	-6.57535	2.16037	-3.04362	0.00233749	0.0368059
ArasteEVm009570t1	10.1586	-6.57561	1.62465	-4.04739	5.17921e-05	0.0026066
ArasteEVm009837t1	10.1465	-6.57716	2.05675	-3.19785	0.00138458	0.0260805
ArasteEVm020246t1	10.1871	-6.57943	2.08245	-3.15946	0.0015806	0.0285627
ArasteEVm001330t2	10.2173	-6.58443	2.05946	-3.19717	0.00138785	0.0261218
ArasteEVm002805t1	10.2504	-6.58501	2.18206	-3.01779	0.00254625	0.0390403
ArasteEVm002964t1	10.2074	-6.58539	1.78427	-3.6908	0.000223554	0.00738565
ArasteEVm058232t2	10.2392	-6.58598	1.71064	-3.85001	0.000118114	0.00474668
ArasteEVm009151t1	10.2522	-6.58634	2.25911	-2.91545	0.00355173	0.0487644
ArasteEVm008080t1	10.255	-6.58639	2.21925	-2.96785	0.00299889	0.0433582
ArasteEVm053688t1	10.3198	-6.58772	1.71736	-3.83597	0.000125072	0.00495473
ArasteEVm061712t2	10.2461	-6.58785	1.69074	-3.89643	9.76214e-05	0.00413264
ArasteEVm012435t1	10.2368	-6.58918	2.21373	-2.9765	0.00291554	0.0425232
ArasteEVm013943t1	10.2406	-6.59007	2.09003	-3.15311	0.00161543	0.0289896
ArasteEVm018423t1	10.3114	-6.59089	1.68142	-3.91983	8.86129e-05	0.00385045
ArasteEVm002199t1	10.2672	-6.59411	1.61646	-4.07936	4.516e-05	0.00233339
ArasteEVm012721t1	10.2767	-6.59462	2.19219	-3.00823	0.00262772	0.0398358
ArasteEVm011982t1	10.2875	-6.59464	2.23508	-2.95051	0.00317251	0.0449999
ArasteEVm024774t4	10.3099	-6.595	2.23134	-2.95563	0.00312031	0.0445307
ArasteEVm013460t2	10.3377	-6.5957	2.15086	-3.06654	0.00216551	0.0350943
ArasteEVm029503t8	10.3251	-6.59578	2.23212	-2.95494	0.0031273	0.044578
ArasteEVm043542t1	10.3233	-6.59667	1.79618	-3.67261	0.000240087	0.00775737
ArasteEVm026801t2	10.3174	-6.59848	1.71086	-3.85682	0.00011487	0.00463941
ArasteEVm053709t1	10.3449	-6.60097	1.7457	-3.78127	0.000156031	0.00572892
ArasteEVm022745t4	10.3407	-6.60297	2.12698	-3.10439	0.00190672	0.0321542
ArasteEVm011482t1	10.3634	-6.60423	1.70097	-3.88263	0.000103331	0.00431728
ArasteEVm008310t3	10.3782	-6.60425	2.17498	-3.03646	0.00239373	0.037421
ArasteEVm031363t1	10.3579	-6.6044	1.80693	-3.65504	0.000257138	0.00812847
ArasteEVm011011t1	10.3747	-6.60635	2.19942	-3.00368	0.00266739	0.0401734
ArasteEVm036067t1	10.3903	-6.60658	2.13865	-3.08914	0.00200739	0.0332843
ArasteEVm006075t1	10.3777	-6.60718	2.14456	-3.0809	0.00206379	0.0339418
ArasteEVm016180t1	10.3819	-6.60787	2.23395	-2.95793	0.00309712	0.0443635
ArasteEVm021703t1	10.3956	-6.60857	1.76994	-3.73377	0.000188632	0.00653018
ArasteEVm007672t3	10.388	-6.60879	2.14798	-3.07674	0.00209277	0.0342432
ArasteEVm022038t1	10.3883	-6.60911	1.78067	-3.71159	0.000205958	0.00695121
ArasteEVm002884t5	10.3677	-6.60928	2.10044	-3.14661	0.00165172	0.0293555
ArasteEVm007575t1	10.4185	-6.6113	1.88769	-3.50233	0.000461211	0.0122139
ArasteEVm009175t1	10.3975	-6.61161	2.08373	-3.17297	0.00150887	0.0276063
ArasteEVm060945t1	10.4615	-6.61204	2.12873	-3.10609	0.00189579	0.0320868
ArasteEVm032353t2	10.426	-6.61346	2.16	-3.06178	0.00220022	0.0354484
ArasteEVm060388t1	10.4804	-6.61634	1.6124	-4.10342	4.07088e-05	0.00216574
ArasteEVm002207t8	10.4619	-6.62076	2.13081	-3.10716	0.00188896	0.0320219
ArasteEVm005881t3	10.5633	-6.62362	1.9222	-3.44585	0.000569269	0.0141943
ArasteEVm011426t1	10.5016	-6.62363	2.26667	-2.92218	0.00347591	0.0480226
ArasteEVm016306t1	10.4919	-6.62444	2.10285	-3.15022	0.0016315	0.0291995
ArasteEVm018995t2	10.4948	-6.62504	2.08247	-3.18134	0.00146595	0.0270868
ArasteEVm000978t3	10.5327	-6.62507	2.14024	-3.09549	0.0019649	0.0328836
ArasteEVm010232t1	10.5647	-6.62814	2.21283	-2.99532	0.0027416	0.0408844
ArasteEVm015976t1	10.5433	-6.63087	2.08961	-3.17325	0.00150741	0.0276004
ArasteEVm054334t1	10.5953	-6.63451	1.57477	-4.21302	2.51983e-05	0.00152467
ArasteEVm023048t1	10.5654	-6.637	1.68498	-3.93893	8.18451e-05	0.00364323
ArasteEVm003605t1	10.6121	-6.63805	2.24352	-2.95877	0.00308873	0.0443026
ArasteEVm013707t1	10.6432	-6.6388	1.71868	-3.86273	0.000112128	0.00458975
ArasteEVm014156t1	10.5861	-6.6391	1.76079	-3.77053	0.000162901	0.00588753
ArasteEVm032650t7	10.621	-6.63973	1.5605	-4.25486	2.0918e-05	0.00133396
ArasteEVm077087t1	10.6606	-6.64019	2.14352	-3.0978	0.00194962	0.0327523
ArasteEVm011366t5	10.7004	-6.64131	1.7214	-3.85809	0.000114278	0.0046232
ArasteEVm058056t1	10.6635	-6.64293	2.16623	-3.06658	0.00216522	0.0350943
ArasteEVm040584t1	10.6562	-6.6446	2.10079	-3.16291	0.00156203	0.0283329
ArasteEVm007760t1	10.6668	-6.64636	2.14007	-3.10567	0.00189848	0.0321003
ArasteEVm060141t1	10.6968	-6.64841	1.76551	-3.76571	0.000166074	0.00596519
ArasteEVm003853t1	10.6745	-6.64843	1.60607	-4.13957	3.47956e-05	0.0019077
ArasteEVm004482t3	10.7577	-6.64843	1.7155	-3.87552	0.000106399	0.004415
ArasteEVm032003t2	10.6847	-6.64901	2.07947	-3.19745	0.00138647	0.0261059
ArasteEVm013052t1	10.6673	-6.64934	2.06621	-3.21813	0.0012903	0.024796
ArasteEVm008286t1	10.7373	-6.65362	2.08729	-3.18769	0.00143416	0.0267122
ArasteEVm011335t1	10.7666	-6.6539	2.21501	-3.004	0.00266454	0.0401621
ArasteEVm069189t1	10.7511	-6.65438	2.18602	-3.04406	0.00233408	0.0367762
ArasteEVm003521t4	10.765	-6.6554	1.7481	-3.80722	0.000140538	0.00537633
ArasteEVm011705t1	10.7438	-6.6555	1.82156	-3.65374	0.000258452	0.00814974
ArasteEVm003276t1	10.737	-6.65594	2.18055	-3.05241	0.0022701	0.0361679
ArasteEVm013957t3	10.7503	-6.65754	2.12474	-3.13334	0.00172829	0.0301738
ArasteEVm000328t3	53.8876	-6.65876	1.35683	-4.90758	9.22075e-07	0.000112852
ArasteEVm006708t1	10.7613	-6.65967	2.13553	-3.11851	0.00181768	0.0311403
ArasteEVm017402t2	10.8113	-6.66111	2.19385	-3.03626	0.00239531	0.037421
ArasteEVm008996t1	10.7817	-6.66208	1.67163	-3.98539	6.73695e-05	0.00317003
ArasteEVm029285t3	10.758	-6.66273	2.15317	-3.09439	0.00197219	0.03296
ArasteEVm018925t2	10.8365	-6.66358	2.17686	-3.0611	0.00220527	0.0354939
ArasteEVm024430t2	10.8408	-6.66588	2.17676	-3.06229	0.00219651	0.0354239
ArasteEVm012346t3	10.8695	-6.66746	2.24301	-2.97255	0.00295333	0.0429065
ArasteEVm008536t6	10.8119	-6.6679	2.14816	-3.104	0.00190924	0.0321854
ArasteEVm032199t3	10.8917	-6.66845	2.18993	-3.04505	0.00232639	0.0366854
ArasteEVm045275t1	10.8411	-6.66862	1.80864	-3.6871	0.000226828	0.0074633
ArasteEVm007371t2	10.8809	-6.66875	2.14145	-3.11412	0.00184491	0.0314512
ArasteEVm009939t1	10.8349	-6.67048	1.6784	-3.97432	7.05814e-05	0.00327663
ArasteEVm015894t2	10.868	-6.67092	2.12457	-3.1399	0.00169006	0.0297461
ArasteEVm019236t2	10.8737	-6.67249	1.79431	-3.7187	0.000200249	0.00682027
ArasteEVm006348t1	10.8849	-6.6748	2.08562	-3.20039	0.00137243	0.0259222
ArasteEVm009377t1	10.9115	-6.6751	2.23588	-2.98544	0.00283167	0.0417523
ArasteEVm007387t2	10.8735	-6.67664	1.74103	-3.83487	0.00012563	0.00496461
ArasteEVm022010t1	10.8979	-6.67838	2.06488	-3.23427	0.00121955	0.0239734
ArasteEVm006853t1	10.9467	-6.68103	2.12966	-3.13713	0.0017061	0.0299052
ArasteEVm012640t2	10.934	-6.68169	2.26502	-2.94994	0.00317835	0.0450021
ArasteEVm058939t1	10.9367	-6.68289	2.06791	-3.23171	0.00123053	0.0240955
ArasteEVm006791t1	10.9511	-6.68574	1.59977	-4.1792	2.92539e-05	0.00169191
ArasteEVm001163t3	55.108	-6.68614	1.33623	-5.00375	5.62264e-07	7.52781e-05
ArasteEVm027868t1	11.0122	-6.68772	1.76842	-3.78175	0.000155727	0.00572892
ArasteEVm011464t1	10.97	-6.68926	1.81738	-3.68071	0.000232582	0.00761255
ArasteEVm037871t1	10.9978	-6.69112	2.19467	-3.04881	0.0022975	0.0364248
ArasteEVm003056t1	11.0112	-6.69285	1.81315	-3.69128	0.000223125	0.00737653
ArasteEVm056178t1	11.0437	-6.69351	1.63027	-4.10576	4.02991e-05	0.00215168
ArasteEVm006249t3	11.0918	-6.69351	1.67629	-3.99305	6.52288e-05	0.00311376
ArasteEVm058558t1	36.1347	-6.69355	1.91867	-3.48864	0.000485478	0.0126979
ArasteEVm003342t1	21.6663	-6.69362	1.57426	-4.25191	2.11953e-05	0.00134466
ArasteEVm001495t1	11.0458	-6.69363	1.67067	-4.00655	6.16117e-05	0.00298607
ArasteEVm011134t1	11.0113	-6.69397	2.1579	-3.10208	0.00192164	0.0323607
ArasteEVm010107t1	11.0215	-6.69505	2.13575	-3.13475	0.00172001	0.0300729
ArasteEVm005754t1	11.0231	-6.69592	2.03466	-3.29093	0.000998565	0.0209327
ArasteEVm018282t5	11.0858	-6.69637	1.70649	-3.92407	8.70644e-05	0.00380493
ArasteEVm013101t2	11.0693	-6.69821	2.27422	-2.94528	0.00322662	0.0454333
ArasteEVm001638t2	11.1087	-6.69825	2.14069	-3.12902	0.00175391	0.0304678
ArasteEVm005043t1	11.0634	-6.69933	2.2117	-3.02904	0.0024533	0.0380242
ArasteEVm025862t1	11.0536	-6.70062	1.82859	-3.66436	0.00024796	0.00794162
ArasteEVm002598t1	11.1009	-6.70118	2.11131	-3.17395	0.00150381	0.0275552
ArasteEVm015723t1	11.1094	-6.70337	1.69611	-3.95219	7.74385e-05	0.00348157
ArasteEVm020662t1	11.0942	-6.70531	2.08213	-3.22041	0.00128006	0.0246775
ArasteEVm007146t1	11.1118	-6.70576	2.06602	-3.24574	0.00117147	0.0234613
ArasteEVm004612t1	11.1279	-6.70651	2.09615	-3.19944	0.00137693	0.0259767
ArasteEVm018127t1	11.1342	-6.7078	1.96325	-3.41669	0.00063388	0.0150966
ArasteEVm037268t2	11.1743	-6.71084	2.13075	-3.14952	0.0016354	0.0292407
ArasteEVm066163t6	11.185	-6.71259	1.77048	-3.7914	0.000149803	0.00559149
ArasteEVm028979t1	11.1889	-6.71321	2.28633	-2.93624	0.00332221	0.0464286
ArasteEVm007670t1	11.1961	-6.71344	1.68968	-3.97321	7.09111e-05	0.00328139
ArasteEVm002311t1	11.1989	-6.71388	2.23241	-3.00746	0.00263441	0.0398624
ArasteEVm065742t1	11.1755	-6.71396	2.06875	-3.24542	0.00117279	0.0234685
ArasteEVm013459t1	11.1989	-6.71457	2.30408	-2.9142	0.00356598	0.0489046
ArasteEVm001086t4	11.2211	-6.71569	2.23679	-3.00237	0.00267883	0.0402705
ArasteEVm027292t1	11.2339	-6.72023	2.10856	-3.18712	0.00143698	0.026735
ArasteEVm027066t2	11.2728	-6.72106	2.19148	-3.06691	0.00216285	0.0350819
ArasteEVm021536t3	11.2796	-6.72304	2.12538	-3.16322	0.00156034	0.0283127
ArasteEVm025922t1	11.2642	-6.72457	2.06395	-3.25811	0.00112157	0.0227249
ArasteEVm006900t1	11.2602	-6.72568	2.15704	-3.11801	0.00182077	0.0311711
ArasteEVm002792t3	11.2911	-6.72692	2.20008	-3.05758	0.00223133	0.0357468
ArasteEVm011356t3	11.2725	-6.72755	2.12712	-3.16275	0.00156284	0.028337
ArasteEVm020439t3	11.3414	-6.72849	1.63937	-4.10433	4.05496e-05	0.00215965
ArasteEVm016336t1	11.289	-6.72933	2.15247	-3.12633	0.00177	0.0305938
ArasteEVm000354t8	11.3433	-6.72955	1.58824	-4.23711	2.26411e-05	0.00141408
ArasteEVm044858t1	11.3302	-6.72957	2.0788	-3.23723	0.00120695	0.0238293
ArasteEVm003265t8	67.9598	-6.7297	2.09456	-3.21294	0.00131382	0.0250888
ArasteEVm009074t1	11.3604	-6.73061	2.16387	-3.11045	0.00186803	0.0317559
ArasteEVm059756t1	11.3648	-6.73269	1.69444	-3.9734	7.0855e-05	0.00328139
ArasteEVm008832t1	11.3284	-6.73323	1.85492	-3.62992	0.000283508	0.00868002
ArasteEVm075059t2	11.3783	-6.73336	2.14375	-3.14093	0.00168412	0.0296917
ArasteEVm005218t3	11.33	-6.735	2.1188	-3.17869	0.00147944	0.0272426
ArasteEVm001670t1	11.3367	-6.73606	2.03363	-3.31234	0.0009252	0.0198518
ArasteEVm014377t1	11.3719	-6.73638	2.22278	-3.03062	0.00244055	0.037922
ArasteEVm004458t3	11.3836	-6.73651	2.28533	-2.94772	0.00320124	0.0451941
ArasteEVm006580t2	11.3413	-6.73655	2.21107	-3.04674	0.0023134	0.0365573
ArasteEVm017595t1	11.4459	-6.73796	1.99697	-3.3741	0.000740587	0.0169388
ArasteEVm017033t2	11.3812	-6.7399	1.74026	-3.87292	0.000107541	0.00444337
ArasteEVm019751t1	11.3676	-6.73998	2.10447	-3.2027	0.00136146	0.0257609
ArasteEVm006187t1	11.3829	-6.74016	2.17654	-3.09673	0.00195665	0.0328021
ArasteEVm054332t1	11.4091	-6.74041	2.25256	-2.99233	0.00276856	0.0411346
ArasteEVm010397t1	11.396	-6.74139	1.68842	-3.99272	6.53185e-05	0.00311376
ArasteEVm006360t2	11.4153	-6.74163	2.25398	-2.99098	0.0027808	0.0412658
ArasteEVm000106t3	108.48	-6.7419	1.61394	-4.17729	2.95009e-05	0.00169703
ArasteEVm004862t5	11.3964	-6.74196	2.3165	-2.91041	0.00360955	0.0492527
ArasteEVm018117t1	11.3937	-6.74242	2.20676	-3.05535	0.00224795	0.0359141
ArasteEVm026320t1	11.413	-6.74421	2.14669	-3.14168	0.00167983	0.0296758
ArasteEVm012822t1	11.4103	-6.7454	1.7911	-3.76606	0.000165844	0.00596276
ArasteEVm007058t5	11.445	-6.74632	2.09115	-3.22614	0.00125474	0.0243815
ArasteEVm006609t3	11.4516	-6.74674	2.11668	-3.18742	0.00143549	0.0267176
ArasteEVm012974t2	11.5402	-6.75406	2.12099	-3.1844	0.00145057	0.0268859
ArasteEVm001962t9	11.5442	-6.75413	2.18608	-3.08961	0.00200418	0.0332652
ArasteEVm000916t1	11.5056	-6.75654	1.91324	-3.53147	0.000413263	0.0113287
ArasteEVm006401t6	11.5515	-6.75708	1.88343	-3.58765	0.000333673	0.00976052
ArasteEVm001355t11	11.5996	-6.75731	1.80361	-3.74655	0.000179282	0.00630099
ArasteEVm012481t1	11.5074	-6.75735	2.07443	-3.25745	0.0011242	0.0227686
ArasteEVm005133t2	11.5388	-6.75788	1.55555	-4.34437	1.39675e-05	0.000979716
ArasteEVm022407t4	11.58	-6.75798	1.71943	-3.93036	8.48189e-05	0.00373142
ArasteEVm003145t1	11.5496	-6.75809	1.6927	-3.9925	6.53809e-05	0.00311376
ArasteEVm007384t7	11.5864	-6.75839	2.26849	-2.97924	0.0028896	0.0422976
ArasteEVm035348t1	11.5448	-6.76047	2.2917	-2.94998	0.00317798	0.0450021
ArasteEVm032810t1	11.5797	-6.76183	1.74406	-3.87707	0.000105723	0.00439827
ArasteEVm010555t1	11.5587	-6.7621	2.27007	-2.97881	0.00289372	0.0423452
ArasteEVm012566t1	11.5632	-6.76282	2.23968	-3.01955	0.00253149	0.0389055
ArasteEVm013104t1	11.5599	-6.76359	2.02779	-3.33545	0.000851613	0.0186593
ArasteEVm012396t1	11.588	-6.76425	2.12344	-3.18551	0.001445	0.0268488
ArasteEVm003017t1	11.5755	-6.76431	1.67529	-4.03769	5.39804e-05	0.0026833
ArasteEVm000248t4	11.6249	-6.76439	2.29566	-2.94659	0.00321295	0.0452935
ArasteEVm015538t1	11.5584	-6.76464	2.08518	-3.24416	0.00117799	0.0234898
ArasteEVm012771t1	22.704	-6.76709	1.78876	-3.78313	0.000154869	0.0057117
ArasteEVm066651t1	252.625	-6.76781	2.06102	-3.28372	0.00102446	0.0212719
ArasteEVm005524t3	11.6035	-6.77002	2.04513	-3.31032	0.00093191	0.0199461
ArasteEVm027667t1	11.6692	-6.77132	1.80543	-3.75054	0.000176453	0.00623322
ArasteEVm059940t2	11.7005	-6.7719	2.23494	-3.03001	0.00244546	0.037939
ArasteEVm029491t1	11.6472	-6.77202	2.20575	-3.07017	0.00213939	0.0348061
ArasteEVm017561t1	11.6613	-6.77363	2.2818	-2.96855	0.0029921	0.0433018
ArasteEVm038182t1	11.6637	-6.77528	2.30976	-2.93333	0.00335343	0.0467705
ArasteEVm016262t4	11.7109	-6.778	2.11604	-3.20315	0.00135935	0.0257373
ArasteEVm004743t3	11.724	-6.77837	1.57638	-4.29995	1.70833e-05	0.00114517
ArasteEVm024085t5	11.7292	-6.7791	2.1164	-3.20312	0.00135946	0.0257373
ArasteEVm012354t4	11.7405	-6.77924	2.2041	-3.07574	0.00209983	0.0343354
ArasteEVm005902t3	11.7246	-6.77955	2.23253	-3.03671	0.00239175	0.0374052
ArasteEVm003196t2	11.7269	-6.78011	2.21505	-3.06092	0.00220656	0.0354939
ArasteEVm053073t1	11.7476	-6.78023	1.70965	-3.96587	7.31295e-05	0.00335316
ArasteEVm012130t1	11.7078	-6.78127	2.10667	-3.21896	0.00128657	0.0247539
ArasteEVm021606t1	11.7151	-6.7813	1.84636	-3.67279	0.000239918	0.00775737
ArasteEVm006079t1	11.7171	-6.78213	2.24427	-3.02197	0.00251134	0.0386887
ArasteEVm024812t7	11.7584	-6.78288	1.71496	-3.95514	7.6491e-05	0.00345192
ArasteEVm003446t1	11.7795	-6.78341	1.62978	-4.16215	3.15259e-05	0.00177555
ArasteEVm000268t4	22.9872	-6.78404	1.48718	-4.56169	5.07436e-06	0.000443758
ArasteEVm015583t4	11.7836	-6.78416	2.15536	-3.14758	0.00164627	0.0293116
ArasteEVm000078t7	11.7634	-6.78531	2.12651	-3.19082	0.00141869	0.0265579
ArasteEVm003780t1	11.7677	-6.78695	1.79561	-3.77976	0.000156982	0.00574645
ArasteEVm000877t2	11.772	-6.78819	1.91969	-3.53609	0.000406092	0.0112146
ArasteEVm022292t3	11.8095	-6.78945	1.57329	-4.31544	1.59286e-05	0.00108732
ArasteEVm017894t1	11.778	-6.78994	2.16857	-3.13107	0.00174169	0.0302881
ArasteEVm024599t1	11.7752	-6.79049	1.65325	-4.10735	4.00217e-05	0.00214568
ArasteEVm004712t17	11.7764	-6.79053	2.14566	-3.16477	0.00155207	0.0282367
ArasteEVm022624t1	11.8115	-6.79076	1.62421	-4.18095	2.90294e-05	0.00168325
ArasteEVm021870t1	11.8041	-6.7913	1.66196	-4.08633	4.38249e-05	0.00229184
ArasteEVm018760t1	11.8083	-6.79181	1.68789	-4.02385	5.72547e-05	0.00282003
ArasteEVm031976t1	11.8065	-6.79389	1.95811	-3.46961	0.000521213	0.0133657
ArasteEVm010339t2	11.842	-6.79519	2.16732	-3.1353	0.00171679	0.0300383
ArasteEVm008061t1	11.8251	-6.79561	2.06963	-3.2835	0.00102528	0.0212719
ArasteEVm005099t3	11.8448	-6.7966	2.14809	-3.16402	0.00155604	0.0282771
ArasteEVm002978t7	11.8531	-6.79755	2.16399	-3.14121	0.00168249	0.0296758
ArasteEVm021612t1	11.893	-6.79807	1.62935	-4.17226	3.0159e-05	0.00171559
ArasteEVm026466t1	11.8466	-6.7984	2.13175	-3.18912	0.00142708	0.0266688
ArasteEVm004217t1	11.8783	-6.80049	1.6216	-4.19369	2.74455e-05	0.00162216
ArasteEVm000550t6	11.9181	-6.80074	2.11396	-3.21706	0.0012951	0.0248588
ArasteEVm006018t1	11.9268	-6.80552	2.20392	-3.08792	0.00201565	0.0333642
ArasteEVm054982t1	11.9472	-6.80555	2.08749	-3.26017	0.00111347	0.0226556
ArasteEVm046604t2	11.9201	-6.80688	1.72826	-3.93857	8.19671e-05	0.0036446
ArasteEVm003240t1	11.9456	-6.80805	2.08823	-3.2602	0.00111333	0.0226556
ArasteEVm031816t1	11.943	-6.80874	1.64447	-4.14038	3.46727e-05	0.00190311
ArasteEVm064683t2	11.9969	-6.80985	1.75798	-3.87368	0.000107204	0.00443701
ArasteEVm014181t1	11.9935	-6.81105	2.20972	-3.08231	0.00205404	0.0338148
ArasteEVm001505t2	11.9672	-6.81369	1.84491	-3.69324	0.000221412	0.0073299
ArasteEVm022124t1	11.9676	-6.81459	1.7656	-3.85966	0.000113546	0.00460869
ArasteEVm022387t1	11.9965	-6.81564	2.13777	-3.18819	0.00143166	0.0267073
ArasteEVm010482t2	12.0738	-6.81812	2.2659	-3.00901	0.00262098	0.0398136
ArasteEVm012951t1	12.019	-6.81901	2.09565	-3.25389	0.00113836	0.0230073
ArasteEVm014086t1	12.0149	-6.8193	1.80021	-3.78805	0.000151833	0.00564321
ArasteEVm006758t1	12.0361	-6.82046	2.15748	-3.16131	0.0015706	0.028435
ArasteEVm010774t1	12.0527	-6.82292	1.88436	-3.62082	0.000293668	0.00883484
ArasteEVm010759t1	12.0919	-6.82424	1.64149	-4.15734	3.21976e-05	0.00180195
ArasteEVm005631t1	12.0975	-6.82611	2.19066	-3.11601	0.00183317	0.031328
ArasteEVm008801t1	12.0719	-6.82616	2.26308	-3.01632	0.00255866	0.039166
ArasteEVm018674t3	12.1404	-6.82768	2.11753	-3.22436	0.00126253	0.0244563
ArasteEVm025100t1	12.1167	-6.82931	1.81833	-3.75581	0.000172781	0.00614833
ArasteEVm014798t3	23.711	-6.83153	2.0067	-3.40436	0.000663203	0.0156033
ArasteEVm025926t1	12.1551	-6.83343	1.68745	-4.04957	5.13118e-05	0.00259136
ArasteEVm024222t2	12.1444	-6.8335	2.12702	-3.21271	0.00131488	0.0250992
ArasteEVm017662t1	12.1965	-6.83438	1.8014	-3.79392	0.000148286	0.00554967
ArasteEVm020863t1	12.1796	-6.83489	1.60749	-4.2519	2.11968e-05	0.00134466
ArasteEVm012427t2	12.2074	-6.83603	2.12809	-3.21228	0.00131686	0.0251271
ArasteEVm036293t1	12.243	-6.8374	2.33848	-2.92386	0.0034572	0.047805
ArasteEVm020160t7	12.2164	-6.83969	2.18331	-3.13271	0.00173199	0.0302042
ArasteEVm032786t2	12.2636	-6.84314	1.74233	-3.92757	8.58086e-05	0.00376703
ArasteEVm035525t5	12.2532	-6.84422	2.15954	-3.1693	0.00152804	0.0278938
ArasteEVm003772t1	12.2489	-6.84458	2.14142	-3.19628	0.00139211	0.0261816
ArasteEVm052258t1	12.2443	-6.8458	1.87292	-3.65514	0.000257038	0.00812847
ArasteEVm059996t1	78.5324	-6.84872	1.7554	-3.90152	9.5591e-05	0.00408186
ArasteEVm005564t3	12.2908	-6.85119	2.16747	-3.16092	0.00157274	0.028442
ArasteEVm017696t4	12.341	-6.85135	2.17074	-3.15623	0.00159825	0.0287703
ArasteEVm000192t6	12.3067	-6.85216	2.2406	-3.05819	0.0022268	0.0357128
ArasteEVm010176t3	12.347	-6.85389	2.15595	-3.17906	0.00147755	0.02722
ArasteEVm042797t1	12.4033	-6.85438	1.7918	-3.82542	0.000130548	0.00511492
ArasteEVm001559t2	193.307	-6.85501	1.50993	-4.53995	5.62666e-06	0.000480109
ArasteEVm004105t1	12.3434	-6.85541	1.71579	-3.99547	6.45656e-05	0.00310132
ArasteEVm011250t1	12.3325	-6.85584	2.08584	-3.28685	0.00101315	0.0211107
ArasteEVm005012t1	12.3324	-6.85739	1.81575	-3.77662	0.000158971	0.00579736
ArasteEVm000459t1	24.2078	-6.85765	1.81866	-3.77071	0.000162785	0.00588753
ArasteEVm038166t1	12.3855	-6.85783	2.11679	-3.23974	0.00119639	0.0237155
ArasteEVm006636t1	12.342	-6.85784	2.1975	-3.12074	0.00180397	0.0309865
ArasteEVm016969t4	12.3554	-6.85869	2.14351	-3.19975	0.00137548	0.0259595
ArasteEVm001720t3	12.4061	-6.85907	2.20044	-3.11714	0.00182615	0.0312521
ArasteEVm060794t1	12.3883	-6.86045	1.71857	-3.99195	6.55312e-05	0.00311376
ArasteEVm003448t1	12.3548	-6.86055	1.71569	-3.99871	6.36896e-05	0.00306948
ArasteEVm006943t2	12.3932	-6.86245	2.09532	-3.27514	0.0010561	0.0217716
ArasteEVm014972t1	12.4058	-6.8627	1.80648	-3.79893	0.00014532	0.00548091
ArasteEVm008820t4	12.4195	-6.86621	2.11197	-3.2511	0.00114961	0.0231388
ArasteEVm002146t6	59.7433	-6.86697	1.98279	-3.46329	0.000533616	0.0135831
ArasteEVm002969t4	12.4194	-6.86772	2.05997	-3.33389	0.000856411	0.0187474
ArasteEVm020775t1	12.452	-6.86973	2.15707	-3.18475	0.00144877	0.0268719
ArasteEVm011168t3	12.4589	-6.87086	2.19387	-3.13184	0.00173713	0.0302413
ArasteEVm010900t1	12.4873	-6.87152	1.79469	-3.8288	0.00012877	0.00506161
ArasteEVm004733t1	12.4651	-6.87244	2.10479	-3.26514	0.00109411	0.022346
ArasteEVm004314t1	12.5234	-6.87452	1.81218	-3.79351	0.00014853	0.00555452
ArasteEVm002862t5	12.5175	-6.87536	1.62581	-4.22889	2.34851e-05	0.00144608
ArasteEVm011946t4	12.495	-6.8755	2.02502	-3.39528	0.000685584	0.01599
ArasteEVm009662t3	12.5551	-6.87866	2.14307	-3.20972	0.00132865	0.025296
ArasteEVm006757t2	12.5624	-6.87928	2.15113	-3.19799	0.0013839	0.0260782
ArasteEVm011509t2	12.5526	-6.88003	2.31745	-2.9688	0.00298968	0.0433018
ArasteEVm008272t4	12.5905	-6.88186	2.12716	-3.23523	0.00121543	0.0239168
ArasteEVm016540t1	12.652	-6.88512	1.8053	-3.81383	0.000136828	0.00527987
ArasteEVm067749t1	12.6123	-6.88772	2.19573	-3.13687	0.00170762	0.0299211
ArasteEVm010736t3	12.6027	-6.88854	1.87314	-3.67753	0.000235504	0.00768098
ArasteEVm001217t2	12.6691	-6.88858	2.26418	-3.04241	0.00234688	0.0368939
ArasteEVm007503t1	12.6567	-6.8941	2.05108	-3.36121	0.000776027	0.0174874
ArasteEVm008230t1	12.6679	-6.89415	2.18312	-3.15793	0.00158892	0.0286643
ArasteEVm002667t2	12.6725	-6.89425	2.28969	-3.011	0.00260388	0.0396232
ArasteEVm012369t1	12.6952	-6.89848	1.81557	-3.79963	0.000144914	0.00547419
ArasteEVm025468t2	12.7797	-6.8986	1.80402	-3.82402	0.000131293	0.0051358
ArasteEVm023404t1	24.9111	-6.90166	2.02198	-3.41332	0.000641775	0.0152696
ArasteEVm011547t1	12.7385	-6.90283	2.21824	-3.11185	0.00185919	0.0316167
ArasteEVm003580t1	48.6606	-6.90671	1.41924	-4.86648	1.13601e-06	0.000134287
ArasteEVm003654t2	12.8039	-6.90763	2.25906	-3.05775	0.00223005	0.0357425
ArasteEVm034472t1	12.8752	-6.90838	1.72438	-4.0063	6.16783e-05	0.00298631
ArasteEVm012617t5	12.8465	-6.90901	1.69157	-4.08439	4.4193e-05	0.00230085
ArasteEVm010898t1	12.844	-6.90905	2.11101	-3.27287	0.00106462	0.0219192
ArasteEVm035090t3	12.8275	-6.90935	2.10074	-3.28902	0.00100538	0.02103
ArasteEVm075914t1	12.8031	-6.90966	2.06413	-3.34749	0.000815468	0.0180738
ArasteEVm013363t5	12.7898	-6.91011	2.02655	-3.40979	0.000650125	0.0154153
ArasteEVm007961t2	12.8152	-6.91119	2.12581	-3.25109	0.00114963	0.0231388
ArasteEVm024812t5	12.81	-6.91133	1.60667	-4.30166	1.69523e-05	0.00114261
ArasteEVm000262t1	12.835	-6.91211	2.214	-3.122	0.00179626	0.0309263
ArasteEVm027580t1	12.8421	-6.91362	2.12192	-3.25819	0.00112124	0.0227249
ArasteEVm023066t1	12.8442	-6.91478	2.1286	-3.24851	0.00116012	0.0233112
ArasteEVm001270t1	12.8476	-6.91631	2.02146	-3.42145	0.000622879	0.01493
ArasteEVm011630t1	12.9272	-6.9191	2.21795	-3.1196	0.00181099	0.0310805
ArasteEVm050209t1	12.9517	-6.92206	2.13374	-3.2441	0.00117822	0.0234898
ArasteEVm001229t1	12.9193	-6.92221	1.69335	-4.08788	4.35332e-05	0.00228342
ArasteEVm002947t2	12.9324	-6.92253	1.62298	-4.26531	1.99629e-05	0.00128567
ArasteEVm023437t3	12.9191	-6.9227	2.09273	-3.30797	0.000939739	0.0200464
ArasteEVm015018t1	12.9254	-6.92284	1.66901	-4.14786	3.35592e-05	0.00186096
ArasteEVm000052t2	12.9461	-6.92343	2.33571	-2.96416	0.0030351	0.0437534
ArasteEVm019240t1	12.9318	-6.92355	2.10272	-3.29267	0.000992401	0.0208486
ArasteEVm028946t4	12.982	-6.92496	1.85823	-3.72664	0.000194047	0.00664172
ArasteEVm007804t1	12.9392	-6.92613	2.18299	-3.17278	0.00150989	0.0276073
ArasteEVm004580t5	13.0714	-6.92964	1.89955	-3.64804	0.000264248	0.00827823
ArasteEVm001172t7	13.0875	-6.93054	1.82038	-3.8072	0.000140548	0.00537633
ArasteEVm001416t10	13.0749	-6.93282	2.25459	-3.07499	0.00210513	0.0344106
ArasteEVm001735t1	13.0187	-6.9338	2.15962	-3.21065	0.00132435	0.0252502
ArasteEVm028991t1	13.1062	-6.93421	1.6867	-4.11112	3.9374e-05	0.00211563
ArasteEVm050810t1	12.998	-6.93504	1.64819	-4.20766	2.58026e-05	0.00155546
ArasteEVm004589t1	13.0351	-6.93771	1.63637	-4.23969	2.23827e-05	0.00140336
ArasteEVm002837t5	13.1218	-6.93903	2.15278	-3.22328	0.0012673	0.0245096
ArasteEVm031946t1	13.0801	-6.93941	1.81586	-3.82155	0.000132613	0.00516658
ArasteEVm014732t1	13.0673	-6.94005	2.07139	-3.35043	0.000806866	0.0179589
ArasteEVm007610t2	13.15	-6.94257	1.65205	-4.2024	2.641e-05	0.00158023
ArasteEVm047733t1	13.0947	-6.94474	1.81918	-3.81752	0.000134802	0.00522118
ArasteEVm003327t4	13.1193	-6.94614	2.0883	-3.32622	0.000880327	0.0191327
ArasteEVm011958t1	13.175	-6.95065	2.12593	-3.26946	0.00107754	0.0220863
ArasteEVm007660t7	13.2014	-6.95375	2.19717	-3.16486	0.00155157	0.0282367
ArasteEVm010932t1	13.2138	-6.95563	1.66061	-4.18859	2.80697e-05	0.00164687
ArasteEVm000031t1	536.678	-6.9581	2.15234	-3.23281	0.00122579	0.0240327
ArasteEVm010607t2	13.2437	-6.95858	1.62676	-4.27758	1.88932e-05	0.0012374
ArasteEVm026309t1	13.2885	-6.96287	2.27374	-3.0623	0.00219644	0.0354239
ArasteEVm023889t1	13.2812	-6.96361	1.74146	-3.99871	6.36895e-05	0.00306948
ArasteEVm003653t1	13.3063	-6.96429	2.08794	-3.33548	0.000851516	0.0186593
ArasteEVm008550t2	13.3015	-6.96479	2.15576	-3.23078	0.00123451	0.0241169
ArasteEVm008685t5	13.299	-6.9655	1.60334	-4.34436	1.39682e-05	0.000979716
ArasteEVm008493t2	13.3321	-6.96602	2.30085	-3.02759	0.00246514	0.0381833
ArasteEVm013573t5	13.361	-6.9684	2.15249	-3.23737	0.00120636	0.0238293
ArasteEVm007251t1	13.3214	-6.96846	2.03036	-3.43214	0.000598849	0.0146069
ArasteEVm012962t4	13.3548	-6.96927	2.16866	-3.21363	0.0013107	0.0250491
ArasteEVm015847t1	13.3627	-6.97155	2.16185	-3.22481	0.00126054	0.0244374
ArasteEVm001025t6	13.3844	-6.97457	2.11426	-3.29882	0.000970931	0.0205221
ArasteEVm032569t1	13.4232	-6.97501	1.65974	-4.20246	2.64026e-05	0.00158023
ArasteEVm000098t3	13.4246	-6.97688	2.38997	-2.91924	0.00350887	0.0483265
ArasteEVm009216t3	13.4704	-6.97753	1.66028	-4.20263	2.63831e-05	0.00158023
ArasteEVm003495t1	13.4242	-6.97844	2.12511	-3.28381	0.00102416	0.0212719
ArasteEVm011716t3	13.4625	-6.9785	2.10754	-3.3112	0.00092898	0.0199045
ArasteEVm065066t1	13.5025	-6.9792	1.6847	-4.14269	3.43253e-05	0.00189477
ArasteEVm008385t1	13.4333	-6.97975	2.10096	-3.32217	0.000893208	0.0193223
ArasteEVm000791t3	13.4528	-6.98075	2.08617	-3.34621	0.000819242	0.0181386
ArasteEVm002190t1	13.4723	-6.98222	1.62254	-4.30327	1.68298e-05	0.00113762
ArasteEVm001751t1	13.5006	-6.98238	2.15028	-3.2472	0.00116546	0.0233849
ArasteEVm009871t1	13.4634	-6.98542	1.75202	-3.98707	6.68938e-05	0.0031582
ArasteEVm011097t1	13.5193	-6.98637	1.6604	-4.20765	2.58035e-05	0.00155546
ArasteEVm009853t1	13.5168	-6.98656	1.78515	-3.91372	9.08843e-05	0.00392449
ArasteEVm015761t2	13.5374	-6.98792	2.20123	-3.17455	0.00150069	0.0275188
ArasteEVm007540t2	13.5229	-6.98846	2.17346	-3.21536	0.00130282	0.0249502
ArasteEVm004355t6	13.539	-6.98965	2.10302	-3.32363	0.000888535	0.0192507
ArasteEVm053248t2	13.5649	-6.99124	1.86882	-3.74099	0.000183294	0.00640484
ArasteEVm032795t2	13.5619	-6.9935	2.05822	-3.39784	0.000679207	0.015895
ArasteEVm029254t1	13.5761	-6.99443	2.22161	-3.14836	0.00164188	0.0292879
ArasteEVm061166t1	13.5987	-6.99445	1.76845	-3.95513	7.6494e-05	0.00345192
ArasteEVm036491t2	46.8856	-6.99463	1.32204	-5.2908	1.21783e-07	2.18606e-05
ArasteEVm000055t3	13.594	-6.99566	2.12943	-3.28523	0.001019	0.021187
ArasteEVm016820t1	13.6229	-6.99682	2.08523	-3.35542	0.000792441	0.0177519
ArasteEVm016694t2	13.6306	-7.00006	1.76374	-3.96887	7.22157e-05	0.00332384
ArasteEVm062304t2	13.6792	-7.00093	1.73432	-4.03669	5.42099e-05	0.00269194
ArasteEVm015507t1	13.6789	-7.00379	1.59597	-4.38842	1.14177e-05	0.00084099
ArasteEVm016122t1	13.7317	-7.00434	1.72139	-4.069	4.72159e-05	0.00241389
ArasteEVm027419t1	13.6797	-7.00519	2.11938	-3.3053	0.000948731	0.0201728
ArasteEVm000501t6	13.7542	-7.00733	2.1433	-3.26941	0.0010777	0.0220863
ArasteEVm005393t1	13.7099	-7.01022	1.7781	-3.94252	8.06286e-05	0.00360161
ArasteEVm012635t1	13.7188	-7.01122	2.03642	-3.44291	0.00057549	0.0142961
ArasteEVm003439t3	13.7681	-7.01139	2.17407	-3.22501	0.00125968	0.0244305
ArasteEVm006896t1	13.7924	-7.01172	1.81309	-3.86727	0.000110061	0.00452165
ArasteEVm035352t1	13.7805	-7.016	2.08412	-3.36641	0.000761531	0.0172711
ArasteEVm002473t1	13.8444	-7.01808	2.15029	-3.26379	0.00109932	0.0224335
ArasteEVm003939t2	13.8329	-7.02059	2.23587	-3.13998	0.0016896	0.0297461
ArasteEVm057185t1	13.837	-7.0207	2.09525	-3.35077	0.000805875	0.0179589
ArasteEVm009019t1	13.8403	-7.02082	1.66277	-4.22236	2.41758e-05	0.00147943
ArasteEVm007264t1	13.8607	-7.02279	2.1768	-3.22621	0.00125443	0.0243815
ArasteEVm014503t1	13.9032	-7.02468	2.13934	-3.28358	0.00102498	0.0212719
ArasteEVm003560t1	13.8806	-7.02573	2.1779	-3.22593	0.00125565	0.0243815
ArasteEVm019954t1	13.8941	-7.02593	1.68797	-4.16235	3.14982e-05	0.00177555
ArasteEVm003609t1	13.8793	-7.02605	1.81541	-3.87022	0.000108737	0.00448134
ArasteEVm022260t2	13.9318	-7.02998	2.16689	-3.24428	0.0011775	0.0234898
ArasteEVm032189t1	13.9473	-7.03158	2.21162	-3.17938	0.00147593	0.02722
ArasteEVm030611t1	13.9789	-7.03185	1.60132	-4.39127	1.1269e-05	0.000835111
ArasteEVm002016t6	13.9432	-7.0321	2.20576	-3.18806	0.00143231	0.0267073
ArasteEVm028671t1	13.9652	-7.03304	1.74062	-4.04054	5.33291e-05	0.00265637
ArasteEVm040874t1	13.9761	-7.03491	2.33895	-3.00772	0.00263217	0.0398607
ArasteEVm015779t2	14.0709	-7.03582	1.762	-3.99308	6.52202e-05	0.00311376
ArasteEVm047734t2	13.9892	-7.03618	2.20194	-3.19544	0.00139619	0.0262176
ArasteEVm019311t2	14.0329	-7.03651	2.35385	-2.98937	0.00279557	0.0413864
[truncated: 1,561 more rows]

## Sheet: Table S2
	baseMean	log2FoldChange	lfcSE	stat	pvalue	padj
AravalEVm001130t3	1656.97	27.6451	3.22594	8.56962	1.0383e-17	1.77247e-14
AravalEVm054833t1	1458.42	27.465	3.22594	8.5138	1.68327e-17	2.74855e-14
AravalEVm048848t4	1442.96	27.4567	3.22594	8.51122	1.72119e-17	2.75068e-14
AravalEVm032515t3	1428.53	27.4381	3.22594	8.50545	1.80893e-17	2.83068e-14
AravalEVm053725t1	1356.04	27.367	3.22595	8.4834	2.18711e-17	3.35261e-14
AravalEVm043158t3	1264.71	27.2594	2.8984	9.40499	5.20366e-21	3.90857e-17
AravalEVm052603t1	1251.4	27.2533	2.89671	9.40836	5.03951e-21	3.90857e-17
AravalEVm030791t2	1218.16	27.2184	2.94121	9.25414	2.15971e-20	1.12264e-16
AravalEVm007103t1	1217.6	27.2182	3.22595	8.43726	3.24862e-17	4.60397e-14
AravalEVm041099t1	1215.95	27.2138	2.95338	9.21448	3.1278e-20	1.34408e-16
AravalEVm016355t1	1114.73	27.0942	3.03435	8.92918	4.29194e-19	1.03992e-15
AravalEVm047387t1	1285.09	27.0601	3.22595	8.38827	4.93343e-17	6.50105e-14
AravalEVm038325t1	1057.06	27.0199	2.60544	10.3706	3.37516e-25	8.45051e-21
AravalEVm040083t1	1332.69	27.0174	2.94782	9.16522	4.94467e-20	1.95476e-16
AravalEVm023813t2	1037.27	26.9939	3.22595	8.36772	5.87446e-17	7.60762e-14
AravalEVm028302t2	1006.8	26.9538	3.22596	8.35529	6.52721e-17	8.03725e-14
AravalEVm040489t1	999.909	26.9377	3.22596	8.35031	6.80836e-17	8.10583e-14
AravalEVm044737t1	995.509	26.9367	3.22596	8.35	6.82614e-17	8.10583e-14
AravalEVm055601t1	2205.78	26.9348	2.9865	9.01885	1.90072e-19	5.09881e-16
AravalEVm055986t4	991.624	26.9323	3.22596	8.34862	6.90666e-17	8.10583e-14
AravalEVm043119t2	980.54	26.9159	3.22596	8.34355	7.20952e-17	8.3311e-14
AravalEVm020756t1	1187.7	26.9011	3.22595	8.33896	7.49495e-17	8.5297e-14
AravalEVm020785t2	979.759	26.8934	3.04664	8.82725	1.07281e-18	2.37002e-15
AravalEVm038374t3	1184.33	26.878	2.87156	9.36006	7.96907e-21	4.98811e-17
AravalEVm057640t1	952.446	26.8738	3.22596	8.33049	8.05077e-17	8.93447e-14
AravalEVm041310t1	949.785	26.872	3.22596	8.32994	8.0885e-17	8.93447e-14
AravalEVm024151t1	933.306	26.843	3.22596	8.32093	8.72784e-17	9.18766e-14
AravalEVm051705t2	931.239	26.8429	2.85951	9.38725	6.15884e-21	4.20548e-17
AravalEVm037271t1	928.592	26.8406	3.22596	8.32021	8.78111e-17	9.18766e-14
AravalEVm045258t2	927.806	26.8395	3.22596	8.31986	8.80701e-17	9.18766e-14
AravalEVm012930t2	912.929	26.8169	3.22596	8.31283	9.34445e-17	9.61479e-14
AravalEVm034544t5	881.54	26.7647	3.22596	8.29667	1.07071e-16	1.0868e-13
AravalEVm023633t1	909.013	26.7562	3.22596	8.29403	1.09478e-16	1.09641e-13
AravalEVm026854t1	871.894	26.745	3.22596	8.29054	1.12737e-16	1.1142e-13
AravalEVm007904t6	859.973	26.733	3.22596	8.28684	1.16299e-16	1.13447e-13
AravalEVm035535t2	858.701	26.7284	2.82381	9.46539	2.92477e-21	2.74607e-17
AravalEVm043562t1	855.461	26.7206	3.22596	8.28298	1.20128e-16	1.14337e-13
AravalEVm061272t1	856.161	26.7202	3.22596	8.28286	1.20255e-16	1.14337e-13
AravalEVm024155t1	868.728	26.7049	3.22596	8.27813	1.25123e-16	1.17478e-13
AravalEVm056803t1	832.774	26.6875	3.22596	8.27272	1.30942e-16	1.21423e-13
AravalEVm004510t1	822.339	26.6692	3.22596	8.26706	1.37308e-16	1.25774e-13
AravalEVm035621t1	816.839	26.661	3.22596	8.26452	1.40262e-16	1.26932e-13
AravalEVm075834t1	813.607	26.6558	3.22596	8.26289	1.42193e-16	1.27147e-13
AravalEVm050640t1	798.16	26.6267	3.22597	8.25388	1.53333e-16	1.33921e-13
AravalEVm017465t1	788.811	26.6126	2.87947	9.2422	2.41488e-20	1.13367e-16
AravalEVm018182t5	784.45	26.602	3.22597	8.24621	1.63504e-16	1.41162e-13
AravalEVm026808t1	780.689	26.5974	3.22597	8.2448	1.65443e-16	1.41213e-13
AravalEVm029701t1	779.04	26.5888	3.22597	8.24211	1.69201e-16	1.42517e-13
AravalEVm042155t6	801.179	26.5852	3.22597	8.24101	1.70766e-16	1.42517e-13
AravalEVm050615t1	770.851	26.5768	3.22597	8.23839	1.74542e-16	1.44068e-13
AravalEVm001349t3	763.962	26.567	3.22597	8.23535	1.7904e-16	1.46175e-13
AravalEVm027596t2	759.683	26.5562	3.22597	8.232	1.84115e-16	1.48701e-13
AravalEVm054034t6	751.164	26.5394	3.22597	8.22679	1.92301e-16	1.53661e-13
AravalEVm060373t3	731.315	26.5099	3.22597	8.21766	2.07504e-16	1.60681e-13
AravalEVm033633t2	733.671	26.5098	2.90048	9.13979	6.25725e-20	2.13634e-16
AravalEVm042110t2	727.608	26.4946	2.89595	9.14886	5.75386e-20	2.12995e-16
AravalEVm067356t1	704.701	26.4485	3.22597	8.19861	2.43183e-16	1.84307e-13
AravalEVm039364t3	694.076	26.4317	3.22597	8.19339	2.53969e-16	1.87021e-13
AravalEVm050333t1	659.659	26.3625	3.22598	8.17195	3.03436e-16	2.21279e-13
AravalEVm031849t1	657.587	26.3559	2.90516	9.0721	1.16743e-19	3.24771e-16
AravalEVm058071t1	653.19	26.3491	2.8266	9.32185	1.14334e-20	6.60606e-17
AravalEVm030360t1	649.313	26.3327	3.22598	8.16272	3.27569e-16	2.34328e-13
AravalEVm010379t2	641.997	26.3023	2.96047	8.88448	6.42197e-19	1.46172e-15
AravalEVm024958t1	620.461	26.2775	3.22598	8.14557	3.7749e-16	2.66975e-13
AravalEVm052608t2	619.359	26.2709	3.22598	8.14354	3.83871e-16	2.66975e-13
AravalEVm053698t1	612.163	26.2597	3.22598	8.14008	3.95031e-16	2.68581e-13
AravalEVm025210t3	612.215	26.2577	3.22598	8.13944	3.97097e-16	2.68581e-13
AravalEVm019455t1	611.209	26.2544	3.22598	8.13842	4.00482e-16	2.68581e-13
AravalEVm060797t2	604.035	26.2398	2.8763	9.12276	7.32349e-20	2.39166e-16
AravalEVm007178t1	624.987	26.2337	3.22598	8.13201	4.22214e-16	2.80649e-13
AravalEVm035074t2	617.527	26.224	3.22598	8.12901	4.32793e-16	2.85158e-13
AravalEVm038212t2	1224.06	26.2084	3.22595	8.12424	4.5016e-16	2.93925e-13
AravalEVm003250t1	590.321	26.2003	3.22598	8.12165	4.59877e-16	2.93925e-13
AravalEVm023073t8	586.468	26.1975	3.22598	8.12077	4.63245e-16	2.93925e-13
AravalEVm053713t3	585.265	26.1954	3.22598	8.12013	4.65666e-16	2.93925e-13
AravalEVm021113t1	589.86	26.1748	2.84159	9.21133	3.22097e-20	1.34408e-16
AravalEVm008462t2	576.216	26.1712	3.22598	8.11262	4.95378e-16	3.10074e-13
AravalEVm077238t1	568.41	26.1538	3.22598	8.10722	5.17899e-16	3.21491e-13
AravalEVm058182t1	565.682	26.1475	3.22599	8.10526	5.26322e-16	3.24042e-13
AravalEVm044635t1	540.881	26.0833	3.22599	8.08537	6.1974e-16	3.69812e-13
AravalEVm004046t4	541.363	26.0829	3.22599	8.08525	6.20358e-16	3.69812e-13
AravalEVm027046t2	535.195	26.0708	3.22599	8.0815	6.39746e-16	3.74386e-13
AravalEVm031917t7	598.779	26.0699	3.22598	8.08122	6.41241e-16	3.74386e-13
AravalEVm050045t3	534.084	26.065	3.22599	8.07968	6.49386e-16	3.74386e-13
AravalEVm001038t2	534.014	26.0645	3.22599	8.07953	6.50178e-16	3.74386e-13
AravalEVm054098t2	584.883	26.0627	3.22598	8.07901	6.52952e-16	3.74386e-13
AravalEVm041319t1	527.307	26.046	3.22599	8.07381	6.81352e-16	3.85932e-13
AravalEVm029685t1	526.918	26.0449	3.22599	8.07345	6.83365e-16	3.85932e-13
AravalEVm066610t1	521.757	26.0346	3.22599	8.07026	7.01489e-16	3.90298e-13
AravalEVm016178t2	519.929	26.0256	3.21206	8.10246	5.38602e-16	3.28906e-13
AravalEVm025364t3	517.996	26.0218	3.22599	8.06628	7.24723e-16	4.0026e-13
AravalEVm008839t3	877.528	26.0213	3.16538	8.22058	2.02529e-16	1.60078e-13
AravalEVm066169t1	511.939	26.0087	3.22599	8.06223	7.49174e-16	4.10744e-13
AravalEVm054505t1	509.49	25.9866	2.90356	8.94991	3.55773e-19	8.9076e-16
AravalEVm040791t1	499.701	25.9746	3.22599	8.05165	8.16866e-16	4.3502e-13
AravalEVm064316t7	500.236	25.9737	3.22599	8.05138	8.18655e-16	4.3502e-13
AravalEVm013147t7	717.265	25.9717	3.22597	8.05082	8.22409e-16	4.3502e-13
AravalEVm070506t5	489.493	25.9453	3.226	8.04257	8.79754e-16	4.62099e-13
AravalEVm023398t3	490.783	25.9451	2.83704	9.14515	5.95495e-20	2.12995e-16
AravalEVm021207t2	599.885	25.9255	3.22598	8.03647	9.24608e-16	4.82286e-13
AravalEVm016632t4	477.59	25.9049	3.226	8.03004	9.74377e-16	5.04741e-13
AravalEVm048539t2	470.86	25.892	2.7991	9.25014	2.24193e-20	1.12264e-16
AravalEVm062787t1	470.322	25.8902	3.226	8.0255	1.01115e-15	5.13173e-13
AravalEVm018595t2	466.395	25.8784	3.13511	8.25439	1.52685e-16	1.33921e-13
AravalEVm055790t1	459.566	25.8549	3.226	8.01453	1.10556e-15	5.49941e-13
AravalEVm018756t1	449.787	25.8252	3.226	8.00531	1.19166e-15	5.88866e-13
AravalEVm036545t1	435.979	25.7963	3.21744	8.01764	1.07793e-15	5.39771e-13
AravalEVm010701t5	440.738	25.7939	3.226	7.99562	1.28919e-15	6.329e-13
AravalEVm016404t1	720.044	25.7937	2.96343	8.70401	3.20353e-18	6.3322e-15
AravalEVm027046t6	429.352	25.764	3.22601	7.98634	1.39004e-15	6.77981e-13
AravalEVm021485t1	428.414	25.7598	3.22601	7.98504	1.40478e-15	6.80748e-13
AravalEVm068190t2	427.325	25.7518	3.22601	7.98256	1.43335e-15	6.90138e-13
AravalEVm017111t1	419.781	25.7306	3.22601	7.97598	1.51181e-15	7.14181e-13
AravalEVm035907t2	416.673	25.7183	3.22601	7.97218	1.55894e-15	7.27299e-13
AravalEVm058950t2	414.942	25.7155	3.22601	7.9713	1.57017e-15	7.28015e-13
AravalEVm001298t1	414.192	25.7117	3.22601	7.97012	1.58514e-15	7.30448e-13
AravalEVm050639t1	757.82	25.7059	2.96564	8.66789	4.40195e-18	8.06437e-15
AravalEVm025694t1	413.275	25.7049	3.22601	7.968	1.61257e-15	7.38556e-13
AravalEVm046771t2	408.776	25.6934	3.22601	7.96445	1.65967e-15	7.55521e-13
AravalEVm064938t1	404.712	25.6799	3.22601	7.96028	1.71655e-15	7.70398e-13
AravalEVm008929t5	406.119	25.6793	3.22601	7.96008	1.71929e-15	7.70398e-13
AravalEVm010470t1	405.49	25.6784	3.22601	7.9598	1.72312e-15	7.70398e-13
AravalEVm000087t1	423.685	25.6531	3.08213	8.32318	8.56351e-17	9.18766e-14
AravalEVm042367t1	395.49	25.6448	3.22601	7.94938	1.87452e-15	8.1089e-13
AravalEVm009385t5	394.446	25.644	3.22601	7.94912	1.87846e-15	8.1089e-13
AravalEVm089214t1	393.285	25.6406	3.22601	7.94807	1.89443e-15	8.1311e-13
AravalEVm019651t2	535.327	25.628	3.22599	7.94422	1.95417e-15	8.33987e-13
AravalEVm086964t3	386.173	25.6153	3.19081	8.02785	9.91958e-16	5.09429e-13
AravalEVm010591t1	385.735	25.6085	3.22602	7.93812	2.05271e-15	8.71092e-13
AravalEVm025404t3	378.948	25.5829	3.22602	7.93019	2.18805e-15	9.04434e-13
AravalEVm018388t1	373.827	25.5699	3.22602	7.92616	2.26031e-15	9.22699e-13
AravalEVm063219t2	369.388	25.5523	3.22602	7.92069	2.36191e-15	9.39242e-13
AravalEVm030604t1	386.368	25.543	3.22602	7.91782	2.41708e-15	9.45583e-13
AravalEVm013780t1	368.473	25.5405	3.22602	7.91702	2.43264e-15	9.46738e-13
AravalEVm022761t1	360.496	25.5189	3.22602	7.91033	2.56707e-15	9.93904e-13
AravalEVm054327t1	360.416	25.5163	3.21697	7.93179	2.16011e-15	9.01389e-13
AravalEVm001639t1	368.266	25.5076	3.19634	7.98023	1.46063e-15	6.98793e-13
AravalEVm003528t1	354.819	25.491	3.22603	7.90169	2.75148e-15	1.05444e-12
AravalEVm013682t1	352.551	25.4864	3.22603	7.90023	2.78385e-15	1.05768e-12
AravalEVm058971t1	352.109	25.4857	3.22603	7.90004	2.78811e-15	1.05768e-12
AravalEVm010954t1	351.671	25.4834	3.22603	7.8993	2.80465e-15	1.05861e-12
AravalEVm054098t1	350.614	25.4768	3.22603	7.89728	2.85059e-15	1.07057e-12
AravalEVm004519t1	346.971	25.4654	3.22603	7.89375	2.93246e-15	1.09584e-12
AravalEVm015832t1	344.08	25.4525	2.8012	9.08631	1.02462e-19	3.07844e-16
AravalEVm070568t7	343.141	25.4409	3.22603	7.88615	3.11664e-15	1.13885e-12
AravalEVm085611t1	338.682	25.4319	3.22603	7.88333	3.18762e-15	1.14695e-12
AravalEVm049102t2	338.864	25.4253	3.19645	7.95423	1.80244e-15	7.96381e-13
AravalEVm012256t1	851.836	25.3955	3.22596	7.87223	3.48369e-15	1.21706e-12
AravalEVm027596t4	333.218	25.3888	3.22603	7.86999	3.54678e-15	1.23336e-12
AravalEVm004253t2	327.839	25.3823	3.22603	7.86797	3.60455e-15	1.23858e-12
AravalEVm049966t3	326.218	25.3797	3.22603	7.86716	3.62775e-15	1.23858e-12
AravalEVm017629t1	328.912	25.3627	3.20316	7.918	2.41361e-15	9.45583e-13
AravalEVm071932t1	450.551	25.3613	3.226	7.86153	3.79476e-15	1.27576e-12
AravalEVm090154t2	318.248	25.3424	3.22604	7.85559	3.97908e-15	1.29946e-12
AravalEVm035907t8	337.741	25.3365	3.18588	7.95273	1.82442e-15	8.0138e-13
AravalEVm008493t1	313.503	25.3241	3.22604	7.84992	4.16307e-15	1.35367e-12
AravalEVm044318t1	380.598	25.3194	3.22602	7.8485	4.21048e-15	1.36011e-12
AravalEVm031761t1	313.823	25.308	3.22604	7.84491	4.33279e-15	1.38487e-12
AravalEVm029343t2	309.466	25.3046	3.22604	7.84386	4.36902e-15	1.38776e-12
AravalEVm029160t1	309.611	25.302	3.22604	7.84305	4.39727e-15	1.38776e-12
AravalEVm012930t6	307.431	25.2937	3.22604	7.84047	4.48867e-15	1.41068e-12
AravalEVm008659t2	441.538	25.2861	3.226	7.83822	4.56988e-15	1.43022e-12
AravalEVm061270t1	302.706	25.2754	3.22604	7.83479	4.69639e-15	1.44899e-12
AravalEVm046737t1	303.26	25.2711	3.22604	7.83348	4.74561e-15	1.44899e-12
AravalEVm011784t1	300.707	25.2661	3.22604	7.83193	4.80449e-15	1.46103e-12
AravalEVm032818t1	303.148	25.2657	3.17542	7.95662	1.76796e-15	7.85772e-13
AravalEVm019725t1	301.815	25.2627	3.22604	7.83087	4.84491e-15	1.46738e-12
AravalEVm015829t2	297.866	25.2515	3.21317	7.85875	3.87985e-15	1.28953e-12
AravalEVm005966t2	293.967	25.2338	3.22605	7.82191	5.20278e-15	1.53855e-12
AravalEVm068574t1	427.721	25.2304	3.22601	7.82093	5.24364e-15	1.54455e-12
AravalEVm017272t1	293.452	25.2287	3.22605	7.82031	5.26952e-15	1.54611e-12
AravalEVm012930t1	591.542	25.2184	3.22598	7.81727	5.39815e-15	1.57769e-12
AravalEVm029933t1	289.511	25.2132	3.22605	7.8155	5.47452e-15	1.59381e-12
AravalEVm032805t2	287.704	25.203	3.22605	7.81235	5.61333e-15	1.61544e-12
AravalEVm000962t4	287.003	25.2009	3.22605	7.8117	5.64217e-15	1.61754e-12
AravalEVm003019t1	567.178	25.1988	2.79566	9.01354	1.99513e-19	5.16751e-16
AravalEVm050075t1	292.425	25.1952	2.86311	8.79995	1.36875e-18	2.93741e-15
AravalEVm035043t1	285.707	25.1939	3.2015	7.8694	3.56348e-15	1.23346e-12
AravalEVm010948t1	285.685	25.1937	3.22605	7.80946	5.74355e-15	1.64034e-12
AravalEVm041933t1	642.529	25.1741	3.22598	7.80355	6.01911e-15	1.66166e-12
AravalEVm022431t1	282.423	25.1733	3.22605	7.80312	6.03943e-15	1.66166e-12
AravalEVm010655t1	280.16	25.1638	3.22605	7.80017	6.18254e-15	1.69483e-12
AravalEVm009576t1	276.492	25.1486	3.22487	7.79834	6.2727e-15	1.71329e-12
AravalEVm034903t1	277.094	25.1451	3.22605	7.79439	6.4719e-15	1.76128e-12
AravalEVm008813t1	275.577	25.1435	3.22606	7.79389	6.49779e-15	1.76128e-12
AravalEVm039193t1	276.361	25.1422	3.22606	7.79348	6.51873e-15	1.76128e-12
AravalEVm041103t1	274.147	25.1332	3.22606	7.7907	6.66389e-15	1.78128e-12
AravalEVm054860t1	273.101	25.1312	3.22606	7.79007	6.69741e-15	1.78389e-12
AravalEVm000143t1	272.238	25.124	3.22606	7.78783	6.81717e-15	1.80937e-12
AravalEVm026849t1	271.028	25.119	3.22606	7.78629	6.90054e-15	1.82048e-12
AravalEVm014145t1	269.678	25.1132	3.22606	7.78447	7.00069e-15	1.82582e-12
AravalEVm016521t3	266.447	25.0969	3.22606	7.77942	7.28551e-15	1.887e-12
AravalEVm012930t3	786.814	25.0942	3.22597	7.77881	7.32116e-15	1.88972e-12
AravalEVm012982t2	264.515	25.0865	2.82328	8.88557	6.35954e-19	1.46172e-15
AravalEVm041009t1	328.609	25.0697	3.18905	7.8612	3.80458e-15	1.27576e-12
AravalEVm021307t1	262.378	25.0696	3.16318	7.92543	2.27351e-15	9.23069e-13
AravalEVm050272t1	259.044	25.0517	3.15806	7.93265	2.14524e-15	9.00184e-13
AravalEVm050324t1	257.914	25.0509	3.22607	7.76517	8.15346e-15	2.04141e-12
AravalEVm035388t2	255.408	25.0358	3.19569	7.83424	4.71671e-15	1.44899e-12
AravalEVm016890t1	254.688	25.0343	3.22607	7.76001	8.49216e-15	2.09672e-12
AravalEVm001964t1	256.207	25.0316	3.22607	7.75918	8.54804e-15	2.09824e-12
AravalEVm015162t1	254.347	25.0257	3.22607	7.75733	8.67383e-15	2.12218e-12
AravalEVm016262t1	253.014	25.0217	3.22607	7.75609	8.75893e-15	2.13604e-12
AravalEVm017093t1	288.555	25.0207	3.21366	7.78572	6.93175e-15	1.82048e-12
AravalEVm058182t3	252.726	25.0199	3.22607	7.75553	8.79756e-15	2.13852e-12
AravalEVm006429t1	252.678	25.0146	3.22607	7.75388	8.91236e-15	2.15944e-12
AravalEVm020049t1	251.498	25.0109	3.20379	7.80666	5.8722e-15	1.65196e-12
AravalEVm004107t1	253.504	25.0096	3.22607	7.75234	9.02163e-15	2.1719e-12
AravalEVm058465t2	248.706	24.9923	3.07684	8.12269	4.55962e-16	2.93925e-13
AravalEVm011198t1	247.885	24.9919	3.22607	7.74687	9.41861e-15	2.24588e-12
AravalEVm024040t1	367.786	24.988	3.21094	7.78214	7.1307e-15	1.85329e-12
AravalEVm006641t4	245.995	24.9827	3.22607	7.744	9.63365e-15	2.25421e-12
AravalEVm024710t3	244.524	24.9774	3.19155	7.82609	5.03262e-15	1.50507e-12
AravalEVm037429t1	244.21	24.9754	3.22607	7.74174	9.80664e-15	2.28757e-12
AravalEVm005367t1	244.563	24.9732	3.22607	7.74105	9.86021e-15	2.29294e-12
AravalEVm053344t1	243.902	24.9723	3.19826	7.80807	5.80691e-15	1.6507e-12
AravalEVm018585t2	243.463	24.9714	3.22607	7.7405	9.90298e-15	2.29578e-12
AravalEVm053711t2	243.397	24.9682	3.22607	7.73951	9.97985e-15	2.29941e-12
AravalEVm018710t1	241.791	24.9622	3.18259	7.84335	4.38686e-15	1.38776e-12
AravalEVm043563t2	249.203	24.9565	3.22607	7.7359	1.02677e-14	2.3513e-12
AravalEVm013138t1	241.23	24.9517	3.22608	7.73437	1.03918e-14	2.36529e-12
AravalEVm040050t6	578.161	24.9446	3.22598	7.73239	1.05548e-14	2.39514e-12
AravalEVm007101t1	237.835	24.9381	3.22608	7.73017	1.07404e-14	2.42261e-12
AravalEVm075012t1	235.995	24.9234	3.22608	7.7256	1.11327e-14	2.49611e-12
AravalEVm032421t1	234.958	24.9215	3.12585	7.9727	1.55244e-15	7.27299e-13
AravalEVm037969t1	234.643	24.9148	3.22608	7.72294	1.13677e-14	2.52618e-12
AravalEVm008808t1	233.336	24.9112	3.18808	7.81386	5.54624e-15	1.60845e-12
AravalEVm015365t1	233.519	24.908	3.22608	7.72084	1.15568e-14	2.56063e-12
AravalEVm007728t1	469.069	24.9059	3.226	7.72037	1.15996e-14	2.56255e-12
AravalEVm052251t1	476.729	24.9017	2.91489	8.54291	1.30879e-17	2.18457e-14
AravalEVm002664t2	231.769	24.8962	3.22608	7.71715	1.18957e-14	2.6126e-12
AravalEVm055569t1	229.664	24.8911	3.16179	7.87247	3.47695e-15	1.21706e-12
AravalEVm050298t3	230.358	24.8898	3.22608	7.71518	1.2081e-14	2.63689e-12
AravalEVm064968t1	229.623	24.8888	3.22608	7.71486	1.21116e-14	2.63689e-12
AravalEVm008554t1	228.784	24.8838	3.22608	7.71333	1.2258e-14	2.66106e-12
AravalEVm028390t1	229.359	24.8796	3.15701	7.88077	3.25374e-15	1.16379e-12
AravalEVm051246t1	264.575	24.879	3.18666	7.80723	5.84576e-15	1.6507e-12
AravalEVm006237t1	226.327	24.8652	3.17753	7.82534	5.06297e-15	1.50507e-12
AravalEVm036984t1	224.408	24.8571	3.22609	7.70503	1.30817e-14	2.7994e-12
AravalEVm039863t1	224.527	24.8567	3.13724	7.92312	2.31626e-15	9.35373e-13
AravalEVm004046t1	223.894	24.854	3.14958	7.89123	2.99215e-15	1.11261e-12
AravalEVm003713t1	233.57	24.8537	3.22608	7.704	1.31873e-14	2.81398e-12
AravalEVm060833t1	657.616	24.8394	3.22598	7.69979	1.36286e-14	2.89172e-12
AravalEVm083477t1	221.01	24.8345	3.19647	7.76935	7.8892e-15	2.00872e-12
AravalEVm073346t1	220.066	24.8304	3.09327	8.02723	9.96992e-16	5.09429e-13
AravalEVm078553t1	219.438	24.8263	3.16336	7.84809	4.22417e-15	1.36011e-12
AravalEVm006816t1	217.362	24.8129	3.22609	7.69131	1.45631e-14	3.03009e-12
AravalEVm034448t2	217.211	24.8087	3.21885	7.70732	1.28492e-14	2.7654e-12
AravalEVm021102t1	521.972	24.787	3.22599	7.68352	1.54778e-14	3.20267e-12
AravalEVm005814t1	213.06	24.7851	3.12881	7.92157	2.34523e-15	9.39242e-13
AravalEVm036065t1	213.051	24.785	3.2261	7.68265	1.55831e-14	3.2156e-12
AravalEVm065623t1	212.051	24.778	3.14172	7.88677	3.10102e-15	1.13885e-12
AravalEVm017244t1	212.034	24.776	3.2261	7.67987	1.59254e-14	3.25724e-12
AravalEVm022620t1	253.852	24.7756	3.21305	7.71092	1.24917e-14	2.70398e-12
AravalEVm027831t2	211.085	24.7689	3.2261	7.67768	1.62e-14	3.27981e-12
AravalEVm004664t1	209.553	24.7576	3.2261	7.67416	1.66504e-14	3.36194e-12
AravalEVm004438t1	210.743	24.7546	3.2261	7.67323	1.67712e-14	3.36891e-12
AravalEVm013389t1	208.989	24.7532	3.17979	7.78454	6.9965e-15	1.82582e-12
AravalEVm038175t1	211.416	24.7522	3.15016	7.85746	3.91987e-15	1.29136e-12
AravalEVm072694t2	206.319	24.7402	3.18803	7.76035	8.46962e-15	2.09672e-12
AravalEVm022312t1	205.844	24.7369	3.13793	7.88319	3.1914e-15	1.14695e-12
AravalEVm018012t1	205.327	24.7348	3.13956	7.87841	3.31568e-15	1.17484e-12
AravalEVm007978t3	205.164	24.7313	3.22044	7.67948	1.59738e-14	3.25724e-12
AravalEVm022420t1	204.336	24.7266	3.2261	7.66454	1.79478e-14	3.55698e-12
AravalEVm016632t1	202.91	24.7169	3.2261	7.66152	1.83744e-14	3.63194e-12
AravalEVm040292t1	202.897	24.7113	3.2261	7.65979	1.86231e-14	3.67144e-12
AravalEVm030145t2	237.638	24.7012	3.22608	7.65672	1.90743e-14	3.75056e-12
AravalEVm022086t1	371.489	24.6994	3.22602	7.6563	1.9137e-14	3.75305e-12
AravalEVm008929t7	199.932	24.6957	3.22611	7.65495	1.93387e-14	3.77145e-12
AravalEVm008838t2	298.965	24.6943	3.22604	7.65467	1.93815e-14	3.77145e-12
AravalEVm018494t1	199.761	24.6924	3.22611	7.65394	1.94912e-14	3.77661e-12
AravalEVm029183t1	199.792	24.6919	3.22611	7.65378	1.95162e-14	3.77661e-12
AravalEVm023105t1	199.583	24.691	3.22611	7.6535	1.95588e-14	3.77661e-12
AravalEVm039548t2	205.854	24.6827	3.2261	7.65092	1.99541e-14	3.82344e-12
AravalEVm021291t1	198.256	24.6816	3.22611	7.65058	2.00072e-14	3.82387e-12
AravalEVm017252t1	239.293	24.6744	3.20711	7.69366	1.42987e-14	2.99166e-12
AravalEVm021111t1	195.189	24.6613	3.21139	7.67932	1.59936e-14	3.25724e-12
AravalEVm003065t1	195.224	24.6613	3.22611	7.64427	2.10128e-14	3.98654e-12
AravalEVm016632t7	194.99	24.6603	3.22611	7.64396	2.10647e-14	3.98654e-12
AravalEVm015480t1	196.437	24.6561	3.1129	7.92062	2.36336e-15	9.39242e-13
AravalEVm012970t1	194.199	24.655	3.22611	7.64233	2.13325e-14	4.01586e-12
AravalEVm010701t4	194.154	24.653	3.22611	7.6417	2.14367e-14	4.02242e-12
AravalEVm010587t1	194.33	24.6523	3.22611	7.64148	2.14745e-14	4.02242e-12
AravalEVm020844t1	193.636	24.6516	3.08992	7.97808	1.48625e-15	7.0655e-13
AravalEVm010540t1	192.761	24.6445	3.22611	7.63907	2.18803e-14	4.06034e-12
AravalEVm014778t1	192.564	24.6443	3.22611	7.63899	2.18932e-14	4.06034e-12
AravalEVm007098t2	192.759	24.6412	3.22611	7.63804	2.20556e-14	4.0804e-12
AravalEVm012622t1	198.606	24.6393	3.22611	7.63746	2.21548e-14	4.08839e-12
AravalEVm008225t1	191.888	24.6393	3.13577	7.85749	3.91923e-15	1.29136e-12
AravalEVm010963t1	192.063	24.6383	3.22612	7.63715	2.22077e-14	4.08839e-12
AravalEVm005395t1	191.672	24.6332	3.17344	7.7623	8.3404e-15	2.08128e-12
AravalEVm039489t2	190.979	24.6315	3.22612	7.63503	2.25776e-14	4.12615e-12
AravalEVm067379t1	190.522	24.6281	3.22612	7.63397	2.27625e-14	4.14985e-12
AravalEVm002042t1	190.135	24.6262	3.22612	7.63338	2.28682e-14	4.15096e-12
AravalEVm003591t1	190.34	24.625	3.22612	7.63301	2.29344e-14	4.15096e-12
AravalEVm034430t1	189.774	24.6237	3.22612	7.63262	2.3003e-14	4.15337e-12
AravalEVm015689t9	189.698	24.6216	3.22612	7.63197	2.31185e-14	4.16421e-12
AravalEVm011912t1	188.988	24.6175	3.22612	7.63069	2.33494e-14	4.18572e-12
AravalEVm050389t1	188.901	24.6073	3.22612	7.62752	2.39309e-14	4.2494e-12
AravalEVm007597t1	187.694	24.6028	3.19746	7.69447	1.42078e-14	2.98095e-12
AravalEVm003821t1	186.912	24.5991	3.22612	7.62498	2.4407e-14	4.29335e-12
AravalEVm063226t1	186.105	24.5955	3.22612	7.62386	2.46195e-14	4.32061e-12
AravalEVm053006t1	211.526	24.5903	3.2261	7.6223	2.49201e-14	4.36251e-12
AravalEVm035086t1	186	24.5896	3.22612	7.62202	2.49744e-14	4.36251e-12
AravalEVm017034t2	185.397	24.5872	3.22612	7.62128	2.51167e-14	4.37719e-12
AravalEVm032539t1	184.977	24.5834	3.22612	7.62011	2.53465e-14	4.407e-12
AravalEVm012781t1	184.12	24.5812	3.22612	7.61943	2.54803e-14	4.41188e-12
AravalEVm013284t1	215.882	24.5785	3.22609	7.61864	2.56358e-14	4.42656e-12
AravalEVm003703t1	183.126	24.5739	3.18812	7.70795	1.27858e-14	2.75967e-12
AravalEVm005365t1	182.474	24.5704	3.06364	8.02001	1.05733e-15	5.33006e-13
AravalEVm019721t1	295.101	24.5602	3.22605	7.61308	2.6764e-14	4.61077e-12
AravalEVm025690t1	461.088	24.5531	2.86284	8.57651	9.7796e-18	1.70829e-14
AravalEVm021108t1	191.456	24.5514	3.15089	7.79191	6.60026e-15	1.77655e-12
AravalEVm019258t1	179.82	24.547	3.22613	7.60882	2.76613e-14	4.7328e-12
AravalEVm010650t1	194.818	24.5447	3.22611	7.60813	2.78101e-14	4.74743e-12
AravalEVm011211t5	222.682	24.5433	3.09603	7.92735	2.23863e-15	9.1884e-13
AravalEVm009318t1	179.125	24.5425	3.15917	7.76866	7.93176e-15	2.01274e-12
AravalEVm036234t1	178.449	24.5383	3.22613	7.6061	2.82493e-14	4.81148e-12
AravalEVm040826t1	181.879	24.5375	3.12231	7.85875	3.87999e-15	1.28953e-12
AravalEVm011016t1	178.872	24.5374	3.15907	7.76729	8.01862e-15	2.02793e-12
AravalEVm038425t2	180.269	24.5364	3.22613	7.60553	2.83741e-14	4.8218e-12
AravalEVm079929t1	178.239	24.5345	3.22613	7.60492	2.8507e-14	4.83344e-12
AravalEVm030514t1	178.444	24.5313	3.22613	7.60395	2.87229e-14	4.85909e-12
AravalEVm038786t1	178.175	24.5282	3.10393	7.90231	2.73771e-15	1.05444e-12
AravalEVm001083t1	311.29	24.5272	3.22604	7.60288	2.8961e-14	4.86367e-12
AravalEVm045781t1	176.276	24.519	3.20263	7.65592	1.91938e-14	3.75439e-12
AravalEVm065027t1	176.047	24.5183	3.22613	7.59991	2.96347e-14	4.93552e-12
AravalEVm013183t1	350.641	24.5155	3.22603	7.59929	2.97749e-14	4.9479e-12
AravalEVm051003t1	175.679	24.5151	3.11192	7.87781	3.33157e-15	1.17484e-12
AravalEVm009675t1	245.313	24.5108	3.22607	7.59773	3.01373e-14	4.98255e-12
AravalEVm004458t1	175.632	24.5108	3.22613	7.59757	3.01732e-14	4.98255e-12
AravalEVm069266t1	180.864	24.5035	3.22613	7.59532	3.07031e-14	5.05739e-12
AravalEVm019893t1	174.585	24.5029	3.13983	7.80391	6.00199e-15	1.66166e-12
AravalEVm008313t2	173.664	24.499	3.22614	7.59391	3.10402e-14	5.10153e-12
AravalEVm018245t1	172.74	24.4916	3.22614	7.5916	3.15973e-14	5.14824e-12
AravalEVm043160t2	172.678	24.4876	3.22614	7.59038	3.18973e-14	5.18587e-12
AravalEVm033602t1	172.406	24.4791	3.15224	7.76563	8.12423e-15	2.04089e-12
AravalEVm014872t1	171.448	24.478	3.15451	7.75969	8.51393e-15	2.09672e-12
AravalEVm065444t2	171.241	24.475	3.13474	7.80767	5.82571e-15	1.6507e-12
AravalEVm026199t1	170.347	24.4708	3.22614	7.58517	3.32056e-14	5.34076e-12
AravalEVm044494t1	169.583	24.4632	3.22614	7.58281	3.38162e-14	5.42452e-12
AravalEVm005771t1	169.079	24.4617	3.22614	7.58235	3.39345e-14	5.42452e-12
AravalEVm022774t1	170.547	24.4616	3.22614	7.58231	3.39467e-14	5.42452e-12
AravalEVm025230t2	169.508	24.4607	3.22614	7.58204	3.40152e-14	5.42452e-12
AravalEVm001959t4	168.893	24.4593	3.22614	7.58159	3.41356e-14	5.43218e-12
AravalEVm012562t1	168.887	24.4565	3.22614	7.58073	3.43617e-14	5.45661e-12
AravalEVm040910t2	167.807	24.4504	3.22614	7.57885	3.48641e-14	5.51366e-12
AravalEVm003343t1	167.976	24.4504	3.22614	7.57883	3.48678e-14	5.51366e-12
AravalEVm012563t1	276.536	24.4384	3.22606	7.57532	3.58243e-14	5.62937e-12
AravalEVm003275t2	184.964	24.4373	3.08163	7.93	2.19149e-15	9.04434e-13
AravalEVm012792t1	167.044	24.4372	3.22614	7.57475	3.59832e-14	5.63497e-12
AravalEVm002453t2	720.259	24.4356	3.22597	7.57465	3.60101e-14	5.63497e-12
AravalEVm029998t1	182.204	24.4322	3.22613	7.57323	3.64057e-14	5.68503e-12
AravalEVm012735t1	165.253	24.4291	3.22615	7.57221	3.66938e-14	5.70946e-12
AravalEVm028684t1	165.135	24.4285	3.22615	7.57204	3.67408e-14	5.70946e-12
AravalEVm028802t1	164.947	24.428	3.22615	7.57187	3.67901e-14	5.70946e-12
AravalEVm008639t1	164.922	24.4267	3.12032	7.82828	4.94576e-15	1.49191e-12
AravalEVm085193t4	167.921	24.4265	3.22614	7.57141	3.69186e-14	5.71759e-12
AravalEVm013398t2	172.35	24.4229	3.22614	7.57033	3.72271e-14	5.75351e-12
AravalEVm016068t1	163.986	24.4182	3.22615	7.56883	3.76604e-14	5.80851e-12
AravalEVm017877t3	164.582	24.4151	3.19577	7.63982	2.17522e-14	4.05423e-12
AravalEVm037817t1	163.619	24.4125	3.22615	7.56707	3.81748e-14	5.87558e-12
AravalEVm007936t1	163.13	24.4116	3.22615	7.5668	3.82517e-14	5.87558e-12
AravalEVm041081t1	162.207	24.4042	3.19263	7.64392	2.10706e-14	3.98654e-12
AravalEVm015499t1	250.542	24.395	3.22607	7.56184	3.97397e-14	6.06693e-12
AravalEVm018661t1	161.098	24.3949	3.19312	7.63983	2.17504e-14	4.05423e-12
AravalEVm023073t6	161.223	24.394	3.19739	7.62935	2.35948e-14	4.20963e-12
AravalEVm037998t1	161.12	24.3896	3.22615	7.55997	4.03151e-14	6.12986e-12
AravalEVm013135t1	160.203	24.3875	3.22615	7.5593	4.05254e-14	6.14268e-12
AravalEVm003966t1	160.437	24.3862	3.22615	7.55891	4.06448e-14	6.14268e-12
AravalEVm025054t1	325.984	24.3857	3.22603	7.55904	4.0607e-14	6.14268e-12
AravalEVm007397t2	160.345	24.3852	3.22615	7.55861	4.07412e-14	6.14488e-12
AravalEVm038662t1	159.783	24.3832	3.22615	7.55798	4.09371e-14	6.16206e-12
AravalEVm022315t2	213.286	24.3799	3.2261	7.5571	4.12164e-14	6.19169e-12
AravalEVm018408t1	159.177	24.378	3.22616	7.55635	4.14522e-14	6.21469e-12
AravalEVm031033t1	158.375	24.3704	3.22616	7.55399	4.22111e-14	6.31585e-12
AravalEVm016541t1	158.873	24.3681	3.14651	7.74448	9.59758e-15	2.25421e-12
AravalEVm024597t2	157.907	24.367	3.22616	7.55295	4.25525e-14	6.34929e-12
AravalEVm012271t1	158.228	24.3638	3.22616	7.55195	4.28782e-14	6.36496e-12
AravalEVm049404t1	180.686	24.3511	3.22613	7.54808	4.41711e-14	6.53106e-12
AravalEVm017378t3	156.098	24.3472	3.19188	7.62787	2.38672e-14	4.24814e-12
AravalEVm046640t1	155.368	24.3418	3.11565	7.81274	5.59578e-15	1.61544e-12
AravalEVm019467t1	155.46	24.3417	3.22616	7.54509	4.51966e-14	6.65649e-12
AravalEVm044083t1	154.756	24.3326	3.22616	7.54228	4.61818e-14	6.7634e-12
AravalEVm016272t1	154.134	24.3325	3.22616	7.54225	4.61927e-14	6.7634e-12
AravalEVm044006t1	154.731	24.3319	3.10536	7.83545	4.67149e-15	1.44899e-12
AravalEVm008232t1	183.164	24.3274	3.19283	7.61937	2.5492e-14	4.41188e-12
AravalEVm013014t5	153.37	24.3262	3.22616	7.54029	4.68919e-14	6.85241e-12
AravalEVm031763t1	153.349	24.3235	3.07129	7.91964	2.38193e-15	9.41639e-13
AravalEVm008850t1	152.865	24.3185	3.22617	7.5379	4.77583e-14	6.96547e-12
AravalEVm040666t1	152.425	24.3169	3.22617	7.53741	4.79397e-14	6.97838e-12
AravalEVm012411t1	376.944	24.3139	3.22602	7.53682	4.81578e-14	6.99658e-12
AravalEVm040058t1	151.566	24.3099	3.22617	7.53523	4.87491e-14	7.06165e-12
AravalEVm011063t1	231.376	24.3089	3.22608	7.53511	4.87938e-14	7.06165e-12
AravalEVm004778t1	158.173	24.3065	3.22616	7.53418	4.91395e-14	7.09144e-12
AravalEVm018259t1	206.968	24.3004	3.2261	7.53245	4.97979e-14	7.16556e-12
AravalEVm007706t1	150.826	24.2981	3.22617	7.53158	5.01301e-14	7.19957e-12
AravalEVm025393t1	150.267	24.298	3.14528	7.72522	1.11662e-14	2.49618e-12
AravalEVm018978t2	149.696	24.2938	3.22617	7.53021	5.06578e-14	7.24764e-12
AravalEVm020003t2	149.743	24.2923	3.22617	7.52977	5.08308e-14	7.25855e-12
AravalEVm051632t1	148.816	24.2846	3.21886	7.54446	4.54169e-14	6.67585e-12
AravalEVm037244t1	157.462	24.2811	3.12644	7.76637	8.07664e-15	2.03575e-12
AravalEVm024933t1	148.656	24.2806	3.22617	7.52613	5.22667e-14	7.43533e-12
AravalEVm012629t1	429.866	24.2757	3.22601	7.52501	5.27174e-14	7.48527e-12
AravalEVm031774t3	327.831	24.2689	3.22603	7.52284	5.36006e-14	7.58201e-12
AravalEVm023073t1	363.244	24.2673	3.22602	7.52235	5.37988e-14	7.59574e-12
AravalEVm085843t1	175.121	24.2662	3.1543	7.69306	1.43661e-14	2.9974e-12
AravalEVm002293t1	147.152	24.265	3.22618	7.5213	5.42323e-14	7.64258e-12
AravalEVm009011t1	150.279	24.2613	3.22617	7.52016	5.47111e-14	7.69562e-12
AravalEVm018673t1	146.307	24.2601	3.22618	7.51976	5.48788e-14	7.70478e-12
AravalEVm018186t1	146.165	24.2569	3.22618	7.51876	5.52976e-14	7.74909e-12
AravalEVm084314t1	145.869	24.2548	3.22618	7.51813	5.55634e-14	7.7687e-12
AravalEVm009804t1	145.573	24.253	3.22618	7.51756	5.58065e-14	7.77688e-12
AravalEVm001470t1	145.505	24.2506	3.22618	7.51682	5.61255e-14	7.80684e-12
AravalEVm009676t2	144.714	24.2439	3.08153	7.86748	3.61866e-15	1.23858e-12
AravalEVm026855t1	144.647	24.2405	3.22618	7.51369	5.74855e-14	7.98124e-12
AravalEVm017415t1	144.094	24.2388	3.22618	7.51316	5.77185e-14	7.98407e-12
AravalEVm001103t1	144.26	24.2367	3.22618	7.51249	5.80116e-14	8.00987e-12
AravalEVm026491t1	143.755	24.2357	3.11829	7.77213	7.71755e-15	1.9717e-12
AravalEVm044096t1	171.876	24.2351	3.22614	7.51209	5.81888e-14	8.01959e-12
AravalEVm022107t2	142.942	24.2277	3.22618	7.5097	5.92637e-14	8.13787e-12
AravalEVm031507t2	141.911	24.218	3.22618	7.50669	6.06426e-14	8.31203e-12
AravalEVm008421t1	147.749	24.2166	3.22617	7.50629	6.08265e-14	8.32203e-12
AravalEVm039402t1	141.83	24.2138	3.12641	7.74493	9.56342e-15	2.25421e-12
AravalEVm021673t6	141.333	24.2115	3.06962	7.88747	3.08377e-15	1.13885e-12
AravalEVm035685t2	159.422	24.2085	3.1146	7.77258	7.69021e-15	1.97142e-12
AravalEVm059456t3	140.913	24.2054	3.22619	7.50279	6.2474e-14	8.53191e-12
AravalEVm015976t1	140.437	24.2033	3.22619	7.50215	6.27789e-14	8.55798e-12
AravalEVm076488t1	451.71	24.2022	2.86952	8.43425	3.33341e-17	4.63665e-14
AravalEVm020540t2	139.974	24.1977	3.07159	7.87788	3.32978e-15	1.17484e-12
AravalEVm079227t2	140.156	24.1965	3.21456	7.52715	5.18603e-14	7.39151e-12
AravalEVm009426t1	139.636	24.1954	3.22619	7.49969	6.39693e-14	8.69455e-12
AravalEVm011961t1	139.666	24.1951	3.22619	7.4996	6.40122e-14	8.69455e-12
AravalEVm021890t1	139.903	24.1945	3.06808	7.88588	3.12336e-15	1.13885e-12
AravalEVm025797t1	139.791	24.1936	3.10005	7.80425	5.98547e-15	1.66166e-12
AravalEVm047646t1	139.033	24.1897	3.22619	7.49792	6.48368e-14	8.79065e-12
AravalEVm015732t2	138.908	24.1853	3.13424	7.71648	1.19585e-14	2.61873e-12
AravalEVm005071t1	138.557	24.1844	3.22619	7.49626	6.56621e-14	8.87422e-12
AravalEVm010755t1	138.705	24.1842	3.22619	7.49621	6.56895e-14	8.87422e-12
AravalEVm060367t1	138.469	24.1783	3.22619	7.49438	6.66141e-14	8.98298e-12
AravalEVm001696t1	138.148	24.1757	3.22619	7.49356	6.70309e-14	9.02298e-12
AravalEVm009124t1	274.362	24.1728	3.22606	7.49297	6.7331e-14	9.04716e-12
AravalEVm006552t1	137.321	24.1714	3.22619	7.49224	6.77083e-14	9.08162e-12
AravalEVm013738t1	136.107	24.1601	3.2262	7.48872	6.95506e-14	9.26256e-12
AravalEVm033466t1	136.239	24.1579	3.13792	7.69868	1.37476e-14	2.90059e-12
AravalEVm025102t3	220.018	24.1551	3.22609	7.48744	7.02319e-14	9.27998e-12
AravalEVm062201t1	135.558	24.1545	3.08677	7.82517	5.06954e-15	1.50507e-12
AravalEVm009705t1	135.652	24.1539	3.14931	7.66958	1.72564e-14	3.44724e-12
AravalEVm033634t3	359.148	24.1478	3.17717	7.60041	2.95196e-14	4.92728e-12
AravalEVm025921t1	134.915	24.1462	3.20919	7.52408	5.30935e-14	7.52446e-12
AravalEVm010859t1	134.569	24.1441	3.2262	7.48375	7.22292e-14	9.50136e-12
AravalEVm023073t7	134.316	24.1407	3.1331	7.70505	1.30788e-14	2.7994e-12
AravalEVm014622t1	134.164	24.1342	3.2262	7.48068	7.39401e-14	9.70541e-12
AravalEVm001480t4	133.628	24.1336	3.2262	7.4805	7.40388e-14	9.70541e-12
AravalEVm015210t1	134.028	24.1304	3.10887	7.76178	8.37457e-15	2.08288e-12
AravalEVm002467t1	133.358	24.1276	3.2262	7.47863	7.51035e-14	9.82783e-12
AravalEVm021175t1	132.911	24.1238	3.17281	7.60328	2.88715e-14	4.86232e-12
AravalEVm070491t2	142.905	24.1229	3.11491	7.74434	9.60819e-15	2.25421e-12
AravalEVm014836t1	132.28	24.12	3.2262	7.47629	7.64495e-14	9.98656e-12
AravalEVm001105t1	132.355	24.1189	3.2262	7.47593	7.6661e-14	9.9968e-12
AravalEVm087283t1	131.528	24.113	3.22621	7.47411	7.77266e-14	1.00832e-11
AravalEVm022772t1	131.507	24.1114	3.22621	7.4736	7.8033e-14	1.01055e-11
AravalEVm033603t1	137.926	24.1089	3.17489	7.59363	3.11069e-14	5.10153e-12
AravalEVm010021t1	175.97	24.1086	3.08953	7.8033	6.03076e-15	1.66166e-12
AravalEVm004180t1	131.069	24.1076	3.22621	7.47242	7.87358e-14	1.0179e-11
AravalEVm023073t5	129.836	24.0991	3.14895	7.65307	1.96237e-14	3.77942e-12
AravalEVm039413t2	130.198	24.0981	3.22621	7.46947	8.05214e-14	1.02859e-11
AravalEVm009614t1	130.307	24.096	3.22621	7.46882	8.09152e-14	1.03187e-11
AravalEVm031798t2	130.202	24.0955	3.0787	7.82652	5.01577e-15	1.50507e-12
AravalEVm006819t1	129.41	24.0895	3.22621	7.46681	8.21636e-14	1.04072e-11
AravalEVm047629t5	129.621	24.0876	3.22621	7.46622	8.25289e-14	1.04359e-11
AravalEVm067373t1	128.911	24.0838	3.22621	7.46505	8.327e-14	1.04896e-11
AravalEVm009084t1	129.134	24.083	3.22621	7.4648	8.34255e-14	1.04896e-11
AravalEVm037969t4	128.974	24.0826	3.22621	7.46466	8.35124e-14	1.04896e-11
AravalEVm007036t1	128.304	24.0745	3.14604	7.65232	1.97388e-14	3.79187e-12
AravalEVm018896t1	127.996	24.0738	3.1498	7.64297	2.12275e-14	4.00613e-12
AravalEVm007355t1	127.863	24.0714	3.11163	7.73595	1.02632e-14	2.3513e-12
AravalEVm012094t1	127.429	24.0681	3.22622	7.46017	8.6411e-14	1.08175e-11
AravalEVm057242t1	196.414	24.0679	3.19587	7.53094	5.0375e-14	7.22094e-12
AravalEVm008599t1	127.358	24.0673	3.22622	7.45992	8.65766e-14	1.08202e-11
AravalEVm021633t1	127.051	24.063	3.22622	7.45859	8.74531e-14	1.08575e-11
AravalEVm038619t1	127.09	24.0614	3.22622	7.45808	8.77929e-14	1.08817e-11
AravalEVm064336t1	141.965	24.0599	3.1755	7.57674	3.54339e-14	5.59141e-12
AravalEVm043126t1	248.748	24.0578	3.22607	7.45731	8.83066e-14	1.09273e-11
AravalEVm002867t1	126.181	24.0545	3.22622	7.45594	8.92264e-14	1.1023e-11
AravalEVm004493t1	125.835	24.0504	3.22622	7.45469	9.00828e-14	1.11105e-11
AravalEVm014945t1	126.103	24.0497	3.1047	7.74621	9.46725e-15	2.24925e-12
AravalEVm007666t1	125.616	24.048	3.22622	7.45394	9.0594e-14	1.11552e-11
AravalEVm038226t1	125.293	24.0446	3.2009	7.51183	5.83065e-14	8.02109e-12
AravalEVm021158t1	124.967	24.0409	3.15801	7.61269	2.68458e-14	4.61428e-12
AravalEVm003509t1	125.313	24.0395	3.22622	7.4513	9.2427e-14	1.13001e-11
AravalEVm029678t1	124.648	24.0323	3.22622	7.44906	9.40109e-14	1.14352e-11
AravalEVm006906t2	124.032	24.032	3.22622	7.44895	9.40857e-14	1.14352e-11
AravalEVm016182t1	124.022	24.0303	3.22622	7.44842	9.4462e-14	1.14624e-11
AravalEVm021492t1	135.404	24.0298	3.1679	7.58541	3.31446e-14	5.34076e-12
AravalEVm024835t1	123.975	24.024	3.22622	7.44648	9.58645e-14	1.16138e-11
AravalEVm086500t1	123.115	24.0195	3.11915	7.70066	1.35363e-14	2.88027e-12
AravalEVm008308t1	123.278	24.0187	3.15	7.62498	2.44065e-14	4.29335e-12
AravalEVm075706t3	123.229	24.0178	3.22623	7.44454	9.7281e-14	1.17327e-11
AravalEVm010530t1	123.588	24.0169	3.22622	7.44429	9.74693e-14	1.17327e-11
AravalEVm085352t1	122.778	24.0163	3.22623	7.44407	9.76264e-14	1.17327e-11
AravalEVm009253t1	177.304	24.0161	3.22613	7.44423	9.75115e-14	1.17327e-11
AravalEVm018491t1	122.937	24.015	3.22623	7.44369	9.79146e-14	1.17362e-11
AravalEVm010478t1	122.377	24.0115	3.22623	7.4426	9.87208e-14	1.18012e-11
AravalEVm022252t1	122.36	24.0098	3.22623	7.44205	9.91328e-14	1.18191e-11
AravalEVm010994t4	121.854	24.0063	3.22623	7.44097	9.99522e-14	1.1898e-11
AravalEVm031475t1	121.681	24.0035	3.15387	7.61081	2.72386e-14	4.6711e-12
AravalEVm022523t1	122.049	24.0035	3.22623	7.44012	1.00596e-13	1.19557e-11
AravalEVm000400t2	121.589	24.0019	3.07516	7.80508	5.94652e-15	1.66166e-12
AravalEVm005123t1	121.255	24.0013	3.22623	7.43943	1.01119e-13	1.19988e-11
AravalEVm010872t1	121.736	23.9997	3.09689	7.7496	9.21813e-15	2.21072e-12
AravalEVm037986t3	121.165	23.9974	3.22623	7.43823	1.02046e-13	1.20311e-11
AravalEVm025984t1	121.486	23.9972	3.22623	7.43817	1.02091e-13	1.20311e-11
AravalEVm040587t1	140.972	23.9955	3.10547	7.72683	1.10255e-14	2.47948e-12
AravalEVm001109t1	120.976	23.9952	3.22623	7.43752	1.02593e-13	1.20311e-11
AravalEVm017396t2	138.917	23.9951	3.22619	7.43758	1.02547e-13	1.20311e-11
AravalEVm000390t1	120.822	23.9939	3.22623	7.43713	1.02893e-13	1.20311e-11
AravalEVm013376t1	120.884	23.9938	3.22623	7.43709	1.02925e-13	1.20311e-11
AravalEVm004080t2	123.674	23.9934	3.22622	7.43701	1.02993e-13	1.20311e-11
AravalEVm020458t1	120.668	23.9916	3.09598	7.74928	9.24176e-15	2.21072e-12
AravalEVm019205t1	120.396	23.9889	3.11739	7.69518	1.41295e-14	2.97282e-12
AravalEVm013516t1	120.401	23.9887	3.22623	7.43551	1.04169e-13	1.21496e-11
AravalEVm009821t1	120.351	23.9877	3.22623	7.4352	1.04413e-13	1.21591e-11
AravalEVm016629t1	119.979	23.9842	3.22623	7.4341	1.05279e-13	1.2241e-11
AravalEVm024808t1	130.923	23.9812	3.12712	7.6688	1.73616e-14	3.45298e-12
AravalEVm006628t1	120.231	23.9807	3.22623	7.43305	1.06123e-13	1.23201e-11
AravalEVm014591t1	119.281	23.9755	3.22624	7.43142	1.07439e-13	1.24207e-11
AravalEVm000737t1	119.485	23.9753	3.22623	7.43136	1.07486e-13	1.24207e-11
AravalEVm003449t1	119.092	23.967	3.22624	7.42879	1.09596e-13	1.25871e-11
AravalEVm054070t1	117.895	23.9616	3.22624	7.42709	1.1101e-13	1.273e-11
AravalEVm012198t1	117.985	23.9608	3.22624	7.42686	1.11205e-13	1.27329e-11
AravalEVm008309t1	122.388	23.9547	3.22623	7.425	1.1278e-13	1.28937e-11
AravalEVm011771t1	117.453	23.9506	3.22624	7.42369	1.13904e-13	1.30023e-11
AravalEVm037969t5	116.931	23.9477	3.22624	7.42279	1.14677e-13	1.30707e-11
AravalEVm009348t1	116.778	23.9465	3.22624	7.42242	1.14997e-13	1.30874e-11
AravalEVm013660t1	139.954	23.9436	3.22619	7.42163	1.15687e-13	1.31459e-11
AravalEVm080522t1	115.547	23.9319	3.22625	7.41787	1.19015e-13	1.3463e-11
AravalEVm006229t2	124.863	23.9275	3.22622	7.41656	1.20203e-13	1.35483e-11
AravalEVm006301t1	115.178	23.927	3.22625	7.41635	1.20396e-13	1.35483e-11
AravalEVm019522t1	115.14	23.9268	3.22625	7.4163	1.20435e-13	1.35483e-11
AravalEVm025598t1	115.209	23.9266	3.22625	7.41624	1.2049e-13	1.35483e-11
AravalEVm078137t1	114.981	23.9249	3.13334	7.63558	2.24798e-14	4.11829e-12
AravalEVm001193t1	115.127	23.9216	3.11518	7.67902	1.60308e-14	3.25724e-12
AravalEVm043859t1	114.513	23.9163	3.22625	7.41303	1.23449e-13	1.38189e-11
AravalEVm045202t1	114.247	23.9151	3.22625	7.41267	1.2378e-13	1.38353e-11
AravalEVm024911t6	302.024	23.9146	3.04426	7.85565	3.97711e-15	1.29946e-12
AravalEVm035621t3	209.66	23.9132	3.13415	7.62988	2.34979e-14	4.20231e-12
AravalEVm011211t3	113.654	23.9085	3.22625	7.41063	1.25704e-13	1.40224e-11
AravalEVm006429t2	113.743	23.9075	3.22625	7.4103	1.26013e-13	1.40224e-11
AravalEVm020314t1	113.676	23.9075	3.14462	7.60267	2.9009e-14	4.86367e-12
AravalEVm022334t1	113.587	23.9067	3.22625	7.41004	1.2626e-13	1.40291e-11
AravalEVm040050t2	222.409	23.9065	3.22609	7.41038	1.25938e-13	1.40224e-11
AravalEVm014942t2	113.31	23.9031	3.22625	7.40894	1.27314e-13	1.41252e-11
AravalEVm073406t1	112.895	23.8986	3.22625	7.40754	1.28663e-13	1.42342e-11
AravalEVm007371t1	151.235	23.8979	3.22617	7.40753	1.28675e-13	1.42342e-11
AravalEVm003725t2	119.943	23.8948	3.19818	7.47137	7.93619e-14	1.01978e-11
AravalEVm006329t1	112.612	23.892	3.22625	7.40549	1.30663e-13	1.44329e-11
AravalEVm043335t1	112.496	23.891	3.18937	7.49082	6.84446e-14	9.16402e-12
AravalEVm028948t1	112.194	23.8889	3.22626	7.40453	1.31614e-13	1.45109e-11
AravalEVm025055t1	112.428	23.8884	3.22625	7.40439	1.31756e-13	1.45109e-11
AravalEVm021030t1	117.386	23.8785	3.1972	7.46857	8.10717e-14	1.03211e-11
AravalEVm060379t1	157.562	23.8755	3.22616	7.40059	1.35585e-13	1.48835e-11
AravalEVm001926t1	111.078	23.8748	3.22626	7.40015	1.36027e-13	1.48835e-11
AravalEVm021898t1	110.998	23.8742	3.22626	7.39997	1.36216e-13	1.48835e-11
AravalEVm007395t1	111.455	23.8736	3.22626	7.39979	1.36396e-13	1.48835e-11
AravalEVm005918t2	110.865	23.8731	3.22626	7.39963	1.36562e-13	1.48835e-11
AravalEVm056298t1	110.919	23.8728	3.22626	7.39952	1.36681e-13	1.48835e-11
AravalEVm003016t6	110.912	23.8726	3.22626	7.39947	1.36724e-13	1.48835e-11
AravalEVm039990t1	110.844	23.8719	3.22626	7.39924	1.36971e-13	1.48888e-11
AravalEVm009734t1	110.9	23.8718	3.19697	7.46701	8.20389e-14	1.04072e-11
AravalEVm015237t1	128.227	23.8689	3.11251	7.66868	1.73771e-14	3.45298e-12
AravalEVm004069t1	110.238	23.8647	3.22626	7.39702	1.39274e-13	1.51173e-11
AravalEVm018424t1	123.19	23.8638	3.22623	7.39682	1.39481e-13	1.51179e-11
AravalEVm052977t1	110.025	23.8632	3.22626	7.39656	1.39757e-13	1.5126e-11
AravalEVm026268t1	109.823	23.8596	3.22626	7.39543	1.40953e-13	1.52099e-11
AravalEVm026847t1	110.091	23.8593	3.22626	7.39534	1.41051e-13	1.52099e-11
AravalEVm044049t2	110.456	23.859	3.22626	7.39525	1.4114e-13	1.52099e-11
AravalEVm020099t1	109.736	23.8577	3.22626	7.39484	1.41579e-13	1.52354e-11
AravalEVm011307t1	109.341	23.8527	3.12785	7.62591	2.42325e-14	4.28271e-12
AravalEVm005821t1	117.332	23.8487	3.22624	7.3921	1.44523e-13	1.55299e-11
AravalEVm043098t1	109.075	23.8441	3.11697	7.64975	2.0137e-14	3.8389e-12
AravalEVm012780t2	108.664	23.8422	3.22627	7.39004	1.46783e-13	1.5683e-11
AravalEVm003248t2	172.021	23.8421	3.22614	7.39028	1.46522e-13	1.5683e-11
AravalEVm036996t1	108.303	23.8411	3.07791	7.74587	9.49264e-15	2.24925e-12
AravalEVm033558t1	107.827	23.8357	3.09968	7.68974	1.47438e-14	3.05921e-12
AravalEVm012510t1	107.954	23.8329	3.22627	7.38713	1.50027e-13	1.59615e-11
AravalEVm033944t1	107.78	23.8316	3.22627	7.38673	1.50487e-13	1.59878e-11
AravalEVm027543t1	107.636	23.8311	3.08785	7.71769	1.18455e-14	2.6092e-12
AravalEVm014674t1	107.484	23.8268	3.22627	7.38526	1.52156e-13	1.60949e-11
AravalEVm004680t1	107.37	23.8265	3.22627	7.38516	1.52273e-13	1.60949e-11
AravalEVm014619t1	121.508	23.826	3.22623	7.38509	1.52352e-13	1.60949e-11
AravalEVm020477t1	107.636	23.8237	3.22627	7.3843	1.53259e-13	1.6168e-11
AravalEVm016570t1	106.823	23.8202	3.22627	7.38319	1.54542e-13	1.62096e-11
AravalEVm014905t1	106.701	23.8189	3.22627	7.3828	1.54998e-13	1.62148e-11
AravalEVm005708t1	163.345	23.8187	3.22615	7.38302	1.54733e-13	1.62096e-11
AravalEVm006924t1	106.413	23.816	3.22627	7.38188	1.5607e-13	1.62612e-11
AravalEVm005094t1	106.482	23.8159	3.22627	7.38186	1.56091e-13	1.62612e-11
AravalEVm009156t1	106.245	23.8145	3.22627	7.38142	1.56614e-13	1.62931e-11
AravalEVm052509t7	106.225	23.8138	3.22627	7.38121	1.56862e-13	1.62963e-11
AravalEVm008810t1	106.288	23.8115	3.17918	7.48984	6.89583e-14	9.21636e-12
AravalEVm034192t1	106.001	23.8114	3.22627	7.38045	1.57755e-13	1.63664e-11
AravalEVm029420t1	119.663	23.8099	3.22623	7.38009	1.58183e-13	1.63882e-11
AravalEVm017328t1	106.734	23.8092	3.22627	7.37977	1.58562e-13	1.64048e-11
AravalEVm091289t1	105.591	23.8053	3.22628	7.37857	1.60001e-13	1.65309e-11
AravalEVm027541t1	106.356	23.8041	3.22627	7.37821	1.60431e-13	1.65449e-11
AravalEVm023949t1	105.829	23.8038	3.22628	7.37809	1.60576e-13	1.65449e-11
AravalEVm001077t1	105.374	23.8023	3.22628	7.37764	1.61116e-13	1.65757e-11
AravalEVm060803t1	145.46	23.8011	3.22618	7.37748	1.61317e-13	1.65757e-11
AravalEVm020999t1	105.386	23.7991	3.19043	7.45953	8.6829e-14	1.08211e-11
AravalEVm085200t1	113.597	23.7984	3.22625	7.3765	1.62508e-13	1.66525e-11
AravalEVm011101t1	105.315	23.7979	3.22628	7.37628	1.62773e-13	1.66569e-11
AravalEVm010548t1	104.825	23.7959	3.22628	7.37565	1.6355e-13	1.67014e-11
AravalEVm038408t1	104.952	23.7956	3.22628	7.37556	1.63652e-13	1.67014e-11
AravalEVm057657t2	104.566	23.7923	3.22628	7.37453	1.64923e-13	1.68082e-11
AravalEVm010398t1	112.817	23.7919	3.07731	7.73139	1.06378e-14	2.40671e-12
AravalEVm019485t1	245.123	23.7853	3.20098	7.43064	1.08074e-13	1.24504e-11
AravalEVm021128t1	104.11	23.785	3.22628	7.37226	1.67763e-13	1.70746e-11
AravalEVm012305t1	103.933	23.784	3.13249	7.59266	3.13401e-14	5.12858e-12
AravalEVm015466t1	103.856	23.783	3.22628	7.37163	1.68552e-13	1.71317e-11
AravalEVm018097t1	103.877	23.7806	3.1342	7.58745	3.26257e-14	5.29284e-12
AravalEVm028192t1	103.613	23.7765	3.22628	7.36961	1.71123e-13	1.73629e-11
AravalEVm032081t1	103.389	23.7747	3.22628	7.36907	1.71829e-13	1.73941e-11
AravalEVm002585t1	111.29	23.773	3.22626	7.36861	1.72421e-13	1.74202e-11
AravalEVm005335t1	214.556	23.7715	3.22609	7.36851	1.72551e-13	1.74202e-11
AravalEVm011415t1	102.965	23.7712	3.22629	7.36798	1.73227e-13	1.7465e-11
AravalEVm085633t1	103.671	23.7691	3.22628	7.36734	1.74068e-13	1.75263e-11
AravalEVm011724t1	102.66	23.7664	3.22629	7.3665	1.75163e-13	1.75937e-11
AravalEVm027938t1	102.375	23.7587	3.22629	7.36408	1.78367e-13	1.78872e-11
AravalEVm003836t1	102.058	23.7569	3.09368	7.67916	1.60131e-14	3.25724e-12
AravalEVm033577t1	119.822	23.7535	3.22623	7.36261	1.80355e-13	1.80624e-11
AravalEVm019555t1	101.743	23.7515	3.17182	7.48831	6.9767e-14	9.27493e-12
AravalEVm005084t1	101.518	23.7509	3.22629	7.36169	1.81601e-13	1.81389e-11
AravalEVm012138t1	159.641	23.7506	3.22616	7.36188	1.81344e-13	1.81373e-11
AravalEVm009004t1	101.528	23.7494	3.22629	7.3612	1.82264e-13	1.81809e-11
AravalEVm010658t1	102.308	23.7459	3.22629	7.36014	1.83723e-13	1.83021e-11
AravalEVm014937t1	100.946	23.7435	3.22629	7.35937	1.84782e-13	1.83833e-11
AravalEVm027315t1	100.672	23.7396	3.22629	7.35815	1.86477e-13	1.85273e-11
AravalEVm095276t1	100.637	23.7389	3.17046	7.48752	7.01874e-14	9.27998e-12
AravalEVm013147t5	100.62	23.7386	3.22629	7.35784	1.86904e-13	1.85453e-11
AravalEVm049093t1	103.351	23.7383	3.13993	7.56013	4.02666e-14	6.12986e-12
AravalEVm022326t1	100.662	23.7379	3.22629	7.35764	1.87187e-13	1.85488e-11
AravalEVm013072t1	100.723	23.734	3.22629	7.35644	1.88877e-13	1.86916e-11
AravalEVm047974t1	210.79	23.7309	3.2261	7.35592	1.89617e-13	1.87401e-11
AravalEVm065557t1	99.9689	23.7278	3.2263	7.3545	1.91639e-13	1.89035e-11
AravalEVm007451t2	99.8284	23.7275	3.2263	7.35441	1.91773e-13	1.89035e-11
AravalEVm009044t1	99.5773	23.7231	3.2263	7.35305	1.93741e-13	1.90474e-11
AravalEVm005606t1	99.4612	23.7225	3.2263	7.35287	1.94e-13	1.9048e-11
AravalEVm060337t1	211.308	23.722	3.2261	7.35314	1.93598e-13	1.90474e-11
AravalEVm034582t1	99.7828	23.7215	3.08917	7.67891	1.60451e-14	3.25724e-12
AravalEVm016455t1	99.1839	23.7181	3.1082	7.63081	2.3328e-14	4.18572e-12
AravalEVm011960t1	99.2416	23.7177	3.2263	7.35137	1.96192e-13	1.92381e-11
AravalEVm064944t1	98.9082	23.7141	3.2263	7.35026	1.97829e-13	1.93382e-11
AravalEVm008384t1	98.7262	23.7069	3.2263	7.34801	2.01177e-13	1.96245e-11
AravalEVm018477t1	99.8605	23.6984	3.2263	7.3454	2.05143e-13	1.99594e-11
AravalEVm003152t1	98.5004	23.6918	3.2263	7.34334	2.08329e-13	2.02432e-11
AravalEVm009001t1	97.1161	23.6888	3.22631	7.34237	2.09839e-13	2.03636e-11
AravalEVm007478t1	96.9049	23.6864	3.08689	7.67321	1.67746e-14	3.36891e-12
AravalEVm032977t1	96.7912	23.6835	3.10277	7.63301	2.29342e-14	4.15096e-12
AravalEVm001965t1	96.7078	23.6814	3.16937	7.47196	7.90073e-14	1.01966e-11
AravalEVm007582t2	134.659	23.681	3.2262	7.34021	2.13257e-13	2.06686e-11
AravalEVm009635t1	188.593	23.6801	3.13586	7.5514	4.30605e-14	6.3794e-12
AravalEVm009249t1	96.7478	23.678	3.22631	7.33903	2.1514e-13	2.07745e-11
AravalEVm005067t1	96.6287	23.6779	3.22631	7.33901	2.15179e-13	2.07745e-11
AravalEVm026310t1	96.2821	23.677	3.22631	7.33872	2.15645e-13	2.07925e-11
AravalEVm050357t1	96.2622	23.6764	3.22631	7.33855	2.1592e-13	2.07925e-11
AravalEVm011568t1	131.715	23.6736	3.22621	7.33792	2.16941e-13	2.08641e-11
AravalEVm028631t1	95.8968	23.6693	3.09943	7.63669	2.2288e-14	4.09315e-12
AravalEVm011949t1	95.713	23.669	3.22631	7.33623	2.19696e-13	2.1102e-11
AravalEVm074129t1	96.097	23.6687	3.12031	7.58538	3.31526e-14	5.34076e-12
AravalEVm013839t1	212.576	23.6674	3.1728	7.45947	8.68722e-14	1.08211e-11
AravalEVm045237t1	97.7395	23.6659	3.22631	7.33529	2.21237e-13	2.12064e-11
AravalEVm055974t1	95.5373	23.6657	3.22631	7.33523	2.21347e-13	2.12064e-11
AravalEVm046424t1	146.352	23.6616	3.22618	7.33426	2.22942e-13	2.1332e-11
AravalEVm032105t3	95.8074	23.6615	3.22631	7.33393	2.23503e-13	2.13584e-11
AravalEVm015761t1	94.8093	23.6564	3.22632	7.33232	2.26194e-13	2.15882e-11
AravalEVm046716t1	94.9565	23.6528	3.22632	7.33121	2.28077e-13	2.17403e-11
AravalEVm039434t1	94.6885	23.6512	3.22632	7.33071	2.28932e-13	2.17701e-11
AravalEVm001080t2	94.5402	23.6511	3.22632	7.33069	2.2897e-13	2.17701e-11
AravalEVm046756t1	94.3239	23.6477	3.22632	7.32963	2.30795e-13	2.18882e-11
AravalEVm033352t1	93.9801	23.6433	3.22632	7.32825	2.33182e-13	2.20599e-11
AravalEVm027323t1	95.787	23.6432	3.22631	7.32824	2.33192e-13	2.20599e-11
AravalEVm002530t1	93.7976	23.6395	3.22632	7.32707	2.35244e-13	2.22259e-11
AravalEVm000793t2	93.5388	23.6363	3.22632	7.32608	2.36985e-13	2.23623e-11
AravalEVm015001t1	93.1257	23.6306	3.22632	7.32432	2.40114e-13	2.26292e-11
AravalEVm009140t1	101.566	23.6284	3.22629	7.32372	2.41191e-13	2.26737e-11
AravalEVm045240t1	147.911	23.6284	3.22617	7.32398	2.40717e-13	2.26576e-11
AravalEVm026872t1	92.886	23.6273	3.16086	7.47496	7.7225e-14	1.00529e-11
AravalEVm023757t1	92.8437	23.6259	3.22633	7.32285	2.4275e-13	2.27688e-11
AravalEVm061693t1	92.8386	23.6258	3.22633	7.32282	2.42808e-13	2.27688e-11
AravalEVm060782t1	96.6698	23.6242	3.22631	7.32236	2.43655e-13	2.27842e-11
AravalEVm030386t1	92.6766	23.6242	3.22633	7.32232	2.43727e-13	2.27842e-11
AravalEVm031791t1	92.5153	23.6216	3.22633	7.32152	2.45179e-13	2.2863e-11
AravalEVm076216t1	92.9121	23.6208	3.1601	7.47472	7.73711e-14	1.00545e-11
AravalEVm018984t1	238.382	23.6195	3.22608	7.32143	2.45335e-13	2.2863e-11
AravalEVm001053t2	99.3737	23.6186	3.2263	7.32064	2.46796e-13	2.29707e-11
AravalEVm009725t1	92.3019	23.6181	3.22633	7.32044	2.47166e-13	2.29767e-11
AravalEVm003161t2	92.2076	23.6169	3.22633	7.32005	2.47879e-13	2.30064e-11
AravalEVm066196t1	92.1142	23.6153	3.22633	7.31956	2.48787e-13	2.30134e-11
AravalEVm040874t4	239.061	23.6144	3.22608	7.31986	2.48233e-13	2.30064e-11
AravalEVm002371t1	92.1575	23.6143	3.22633	7.31924	2.49375e-13	2.30394e-11
AravalEVm022321t1	239.234	23.6141	3.22608	7.31977	2.48405e-13	2.30064e-11
AravalEVm001853t1	92.4822	23.6139	3.11713	7.57552	3.57679e-14	5.62937e-12
AravalEVm013012t1	91.8896	23.6119	3.22633	7.31849	2.5077e-13	2.31398e-11
AravalEVm014050t1	91.7725	23.6103	3.22633	7.318	2.51702e-13	2.31779e-11
AravalEVm050959t1	91.8665	23.6101	3.22633	7.31794	2.51799e-13	2.31779e-11
AravalEVm046280t3	91.9084	23.6084	3.22633	7.31742	2.52791e-13	2.32157e-11
AravalEVm034090t1	91.6439	23.6083	3.22633	7.31739	2.52834e-13	2.32157e-11
AravalEVm015533t1	91.828	23.6076	3.22633	7.31717	2.53257e-13	2.32157e-11
AravalEVm005310t1	91.8113	23.6055	3.22633	7.31652	2.54485e-13	2.32824e-11
AravalEVm003719t2	91.2035	23.6017	3.22633	7.31535	2.56718e-13	2.34404e-11
AravalEVm016029t1	91.2814	23.6015	3.22633	7.31527	2.56858e-13	2.34404e-11
AravalEVm041122t1	91.1531	23.601	3.22633	7.31512	2.57148e-13	2.34404e-11
AravalEVm001899t2	91.1116	23.5998	3.22633	7.31475	2.57866e-13	2.34773e-11
AravalEVm024681t1	90.6986	23.5933	3.22634	7.31272	2.6179e-13	2.38058e-11
AravalEVm010287t1	90.5844	23.5905	3.22634	7.31187	2.63454e-13	2.38992e-11
AravalEVm035915t2	90.6625	23.5889	3.22634	7.31135	2.6448e-13	2.39136e-11
AravalEVm026744t1	94.3837	23.5888	3.22632	7.31136	2.64461e-13	2.39136e-11
AravalEVm012036t1	90.3639	23.5887	3.22634	7.3113	2.64568e-13	2.39136e-11
AravalEVm054422t1	90.455	23.5852	3.11817	7.5638	3.9145e-14	5.9883e-12
AravalEVm018100t1	90.4228	23.5848	3.22634	7.3101	2.66943e-13	2.40994e-11
AravalEVm006008t1	90.2729	23.584	3.17316	7.43235	1.06685e-13	1.23663e-11
AravalEVm038795t1	180.125	23.5777	3.22613	7.30835	2.70447e-13	2.43863e-11
AravalEVm077388t1	89.4744	23.5747	3.22634	7.30695	2.73269e-13	2.46113e-11
AravalEVm031107t1	89.324	23.5726	3.22634	7.3063	2.7459e-13	2.47006e-11
AravalEVm003961t1	89.6341	23.571	3.22634	7.3058	2.75624e-13	2.4747e-11
AravalEVm019019t1	89.2686	23.5707	3.15722	7.46567	8.28786e-14	1.04625e-11
AravalEVm025864t1	188.813	23.5692	3.22612	7.30573	2.75765e-13	2.4747e-11
AravalEVm008329t1	89.0968	23.5687	3.22634	7.30509	2.7709e-13	2.48086e-11
AravalEVm001038t1	226.57	23.5668	3.22609	7.30508	2.77112e-13	2.48086e-11
AravalEVm002461t1	88.6526	23.5609	3.22634	7.30265	2.82156e-13	2.52001e-11
AravalEVm020017t1	198.819	23.5605	3.22611	7.30308	2.8125e-13	2.51491e-11
AravalEVm033766t1	88.2958	23.5563	3.22635	7.30122	2.85175e-13	2.54395e-11
AravalEVm012013t1	88.158	23.5538	3.22635	7.30045	2.86807e-13	2.55547e-11
AravalEVm001989t3	88.0512	23.5519	3.22635	7.29986	2.88072e-13	2.56371e-11
AravalEVm010538t1	87.801	23.5485	3.22635	7.29881	2.90322e-13	2.57804e-11
AravalEVm004164t1	87.8772	23.5476	3.22635	7.29853	2.90937e-13	2.58003e-11
AravalEVm010422t1	216.043	23.5466	3.22609	7.29879	2.90369e-13	2.57804e-11
AravalEVm059417t1	88.8534	23.5391	3.22634	7.2959	2.96676e-13	2.62473e-11
AravalEVm004343t1	87.1903	23.5385	3.22635	7.29569	2.97133e-13	2.62525e-11
AravalEVm018255t1	87.1035	23.5362	3.22635	7.29499	2.98681e-13	2.63316e-11
AravalEVm047122t1	86.5865	23.5294	3.22635	7.29286	3.03436e-13	2.67194e-11
AravalEVm009791t3	86.5434	23.5281	3.22636	7.29247	3.04321e-13	2.6766e-11
AravalEVm010379t3	143.361	23.5206	3.22618	7.29055	3.087e-13	2.70877e-11
AravalEVm024295t1	85.9893	23.5197	3.10854	7.56615	3.84442e-14	5.8931e-12
AravalEVm044096t2	86.2778	23.5166	3.15278	7.459	8.71836e-14	1.08419e-11
AravalEVm008840t2	85.7268	23.5152	3.22636	7.28847	3.13495e-13	2.74444e-11
AravalEVm019743t1	190.802	23.5104	3.22612	7.28753	3.15684e-13	2.76038e-11
AravalEVm037391t1	113.517	23.5104	3.22625	7.28722	3.16416e-13	2.76356e-11
AravalEVm020212t1	85.239	23.5073	3.09888	7.58574	3.30601e-14	5.34076e-12
AravalEVm011971t1	146.262	23.4998	3.22618	7.28411	3.2379e-13	2.82468e-11
AravalEVm030212t1	84.8785	23.4969	3.22636	7.28279	3.26983e-13	2.84923e-11
AravalEVm027073t1	90.9383	23.4951	3.22633	7.28228	3.28216e-13	2.85535e-11
AravalEVm009127t1	84.6613	23.495	3.22636	7.28219	3.28446e-13	2.85535e-11
AravalEVm007948t1	84.5862	23.4934	3.15569	7.44477	9.71158e-14	1.17327e-11
AravalEVm029400t1	84.4605	23.4921	3.22637	7.28128	3.30662e-13	2.87129e-11
AravalEVm024976t1	84.3009	23.491	3.22637	7.28096	3.31461e-13	2.87491e-11
AravalEVm017959t1	84.3578	23.489	3.22637	7.28032	3.33023e-13	2.88513e-11
AravalEVm062664t1	84.2239	23.488	3.15546	7.44361	9.7968e-14	1.17362e-11
AravalEVm008314t4	83.9636	23.4845	3.22637	7.27892	3.36512e-13	2.91199e-11
AravalEVm002195t1	88.6031	23.4833	3.11695	7.53405	4.91884e-14	7.09144e-12
AravalEVm024446t1	83.8645	23.4831	3.22637	7.2785	3.37554e-13	2.91764e-11
AravalEVm022913t2	83.7184	23.4801	3.22637	7.27757	3.3988e-13	2.93253e-11
AravalEVm008929t6	83.5633	23.4797	3.09043	7.59754	3.01824e-14	4.98255e-12
AravalEVm021047t1	83.783	23.4796	3.22637	7.27742	3.40268e-13	2.93253e-11
AravalEVm007662t4	83.938	23.4794	3.22637	7.27735	3.40447e-13	2.93253e-11
AravalEVm047931t1	83.3946	23.4767	3.22637	7.27651	3.42576e-13	2.94749e-11
AravalEVm038820t1	83.2994	23.4757	3.22637	7.2762	3.43343e-13	2.9507e-11
AravalEVm017075t1	83.5825	23.4751	3.22637	7.27602	3.43814e-13	2.95138e-11
AravalEVm008849t1	83.252	23.4746	3.22637	7.27585	3.44253e-13	2.95177e-11
AravalEVm030229t1	83.2279	23.4741	3.22637	7.27569	3.4465e-13	2.9518e-11
AravalEVm061254t1	165.147	23.4739	3.15596	7.43796	1.02254e-13	1.20311e-11
AravalEVm014898t1	88.206	23.4732	3.22635	7.27549	3.45168e-13	2.95288e-11
AravalEVm019765t3	83.4625	23.4716	3.22637	7.27491	3.46643e-13	2.96212e-11
AravalEVm008013t1	99.494	23.4686	3.17564	7.39019	1.46616e-13	1.5683e-11
AravalEVm014485t1	82.9828	23.4683	3.22637	7.27388	3.49307e-13	2.98149e-11
AravalEVm088427t1	83.5097	23.4675	3.22637	7.27364	3.49936e-13	2.98347e-11
AravalEVm016287t2	83.5121	23.4658	3.22637	7.27312	3.51265e-13	2.99141e-11
AravalEVm015733t1	102.474	23.4641	3.22629	7.27277	3.52185e-13	2.99585e-11
AravalEVm037990t2	84.1014	23.4609	3.22637	7.2716	3.55249e-13	3.01849e-11
AravalEVm053309t1	82.4452	23.4595	3.22638	7.27115	3.56432e-13	3.025e-11
AravalEVm027532t1	87.8917	23.4586	3.22635	7.27093	3.5701e-13	3.025e-11
AravalEVm000933t3	82.3081	23.4584	3.22638	7.27082	3.573e-13	3.025e-11
AravalEVm007545t3	85.5645	23.4583	3.20371	7.32223	2.43882e-13	2.27842e-11
AravalEVm031631t1	82.579	23.4577	3.22638	7.2706	3.57899e-13	3.025e-11
AravalEVm002573t1	82.4348	23.457	3.22638	7.2704	3.58431e-13	3.025e-11
AravalEVm016752t1	87.5431	23.4569	3.22635	7.27041	3.58403e-13	3.025e-11
AravalEVm023157t3	82.114	23.455	3.22638	7.26977	3.6009e-13	3.03399e-11
AravalEVm008817t2	82.0933	23.4548	3.22638	7.26969	3.60304e-13	3.03399e-11
AravalEVm086881t1	82.0613	23.4538	3.22638	7.26938	3.61137e-13	3.03759e-11
AravalEVm058997t1	82.3114	23.4527	3.22638	7.26904	3.62055e-13	3.04191e-11
AravalEVm014613t1	82.0187	23.452	3.22638	7.26882	3.62653e-13	3.04353e-11
AravalEVm028292t1	82.1453	23.4504	3.22638	7.26832	3.63975e-13	3.05121e-11
AravalEVm024135t1	81.7627	23.4494	3.22638	7.26802	3.6479e-13	3.05279e-11
AravalEVm011751t1	82.056	23.4492	3.22638	7.26795	3.64976e-13	3.05279e-11
AravalEVm018707t1	132.117	23.4465	3.2262	7.26751	3.66181e-13	3.05946e-11
AravalEVm006518t1	82.1709	23.4459	3.22638	7.26694	3.67722e-13	3.06893e-11
AravalEVm027255t1	86.4811	23.4408	3.22636	7.2654	3.71933e-13	3.09375e-11
AravalEVm002303t1	91.6767	23.4356	3.22633	7.26386	3.76195e-13	3.12575e-11
AravalEVm011656t1	81.0994	23.4335	3.22638	7.26308	3.78369e-13	3.14034e-11
AravalEVm035691t1	220.034	23.4321	2.85084	8.21936	2.04594e-16	1.60078e-13
AravalEVm013644t1	80.78	23.4307	3.22639	7.2622	3.80839e-13	3.15422e-11
AravalEVm049966t1	86.922	23.4304	3.22635	7.26219	3.80882e-13	3.15422e-11
AravalEVm037843t1	80.78	23.4298	3.22639	7.26194	3.81588e-13	3.15659e-11
AravalEVm003223t1	140.762	23.4257	3.22619	7.26112	3.83897e-13	3.1722e-11
AravalEVm023650t2	80.5283	23.423	3.12748	7.48939	6.91935e-14	9.23137e-12
AravalEVm058489t1	80.2511	23.4228	3.22639	7.25976	3.87771e-13	3.20069e-11
AravalEVm022655t1	80.0313	23.4182	3.14321	7.45042	9.30464e-14	1.13456e-11
AravalEVm005265t1	79.8148	23.4132	3.22639	7.25677	3.96447e-13	3.26871e-11
AravalEVm032531t2	79.5434	23.4107	3.22639	7.25601	3.98677e-13	3.28349e-11
AravalEVm040017t1	90.0136	23.4071	3.22634	7.25501	4.01635e-13	3.30423e-11
AravalEVm054729t2	79.2729	23.4067	3.2264	7.25474	4.02439e-13	3.30722e-11
AravalEVm020219t1	79.3246	23.4059	3.14097	7.45179	9.2082e-14	1.1283e-11
AravalEVm011018t1	79.5265	23.405	3.1332	7.46999	8.02039e-14	1.02628e-11
AravalEVm020679t1	84.3521	23.4042	3.22637	7.25404	4.04535e-13	3.31568e-11
AravalEVm018594t1	79.2391	23.4038	3.2264	7.25387	4.05037e-13	3.31568e-11
AravalEVm006602t1	79.1267	23.4036	3.2264	7.2538	4.05234e-13	3.31568e-11
AravalEVm003631t2	82.1135	23.4023	3.22638	7.25343	4.06355e-13	3.32116e-11
AravalEVm019761t5	89.5939	23.4016	3.22634	7.25328	4.06788e-13	3.32116e-11
AravalEVm019498t1	78.9973	23.4002	3.2264	7.25275	4.08404e-13	3.33073e-11
AravalEVm012145t3	79.0586	23.3993	3.2264	7.25245	4.09298e-13	3.33441e-11
AravalEVm010036t1	79.1461	23.3988	3.2264	7.25229	4.09782e-13	3.33473e-11
AravalEVm011551t1	78.565	23.3901	3.2264	7.24958	4.18051e-13	3.39454e-11
AravalEVm030516t1	78.8794	23.3896	3.2264	7.24944	4.18488e-13	3.39454e-11
AravalEVm035406t1	78.3364	23.3885	3.2264	7.24911	4.19532e-13	3.39747e-11
AravalEVm004552t1	82.3219	23.3881	3.22638	7.24903	4.19754e-13	3.39747e-11
AravalEVm001202t2	78.2104	23.3871	3.2264	7.24866	4.20923e-13	3.40327e-11
AravalEVm029343t1	120.998	23.384	3.22623	7.24807	4.22742e-13	3.4143e-11
AravalEVm030779t1	78.0009	23.384	3.07621	7.60155	2.92613e-14	4.89505e-12
AravalEVm005682t2	77.8425	23.38	3.2264	7.24647	4.27773e-13	3.45122e-11
AravalEVm009337t1	79.7711	23.3774	3.22639	7.24567	4.30294e-13	3.46784e-11
AravalEVm002374t3	77.7505	23.3722	3.2264	7.24404	4.35524e-13	3.50622e-11
AravalEVm029426t3	77.627	23.3716	3.22641	7.24385	4.36135e-13	3.50739e-11
AravalEVm002282t1	77.3162	23.371	3.22641	7.24367	4.36716e-13	3.5083e-11
AravalEVm047971t1	77.4054	23.3691	3.22641	7.24307	4.38648e-13	3.52006e-11
AravalEVm013910t1	79.666	23.3644	3.22639	7.24165	4.43275e-13	3.55339e-11
AravalEVm005093t1	77.1702	23.364	3.22641	7.24147	4.43833e-13	3.55407e-11
AravalEVm015476t1	77.0133	23.362	3.22641	7.24086	4.45845e-13	3.56638e-11
AravalEVm008238t1	84.1494	23.3597	3.22637	7.24026	4.47837e-13	3.5747e-11
AravalEVm008448t1	76.6535	23.3588	3.22641	7.23987	4.49125e-13	3.58118e-11
AravalEVm017857t1	232.009	23.3578	3.22608	7.24029	4.47714e-13	3.5747e-11
AravalEVm003559t1	76.5361	23.3568	3.22641	7.23926	4.51134e-13	3.59338e-11
AravalEVm004254t1	78.503	23.3548	3.2264	7.23865	4.53165e-13	3.6057e-11
AravalEVm016179t1	76.4444	23.3544	3.22641	7.23851	4.5364e-13	3.6057e-11
AravalEVm063198t1	76.4579	23.3534	3.22641	7.23821	4.54653e-13	3.60993e-11
AravalEVm009626t1	78.3926	23.3525	3.2264	7.23795	4.55519e-13	3.61298e-11
AravalEVm016949t1	76.1495	23.3499	3.22641	7.23709	4.58415e-13	3.63212e-11
AravalEVm029941t1	75.7979	23.3432	3.22642	7.23504	4.65406e-13	3.68311e-11
AravalEVm016491t1	78.1556	23.3427	3.2264	7.23491	4.65831e-13	3.68311e-11
AravalEVm008101t1	77.8389	23.3419	3.2264	7.23464	4.66767e-13	3.68662e-11
AravalEVm017851t1	75.6693	23.3405	3.22642	7.23419	4.68311e-13	3.69493e-11
AravalEVm015550t1	75.5729	23.3395	3.22642	7.23387	4.69429e-13	3.69987e-11
AravalEVm039864t1	75.5258	23.338	3.22642	7.23342	4.70979e-13	3.70609e-11
AravalEVm046278t1	75.6696	23.3378	3.22642	7.23336	4.71205e-13	3.70609e-11
AravalEVm010175t2	75.4043	23.3361	3.22642	7.23281	4.73096e-13	3.71319e-11
AravalEVm007552t1	130.032	23.3348	3.22621	7.23288	4.72871e-13	3.71319e-11
AravalEVm046824t2	77.5497	23.3347	3.1245	7.46831	8.12293e-14	1.03237e-11
AravalEVm064334t1	132.97	23.3336	3.2262	7.23253	4.74083e-13	3.71705e-11
AravalEVm021104t1	75.58	23.3321	3.22642	7.23156	4.77459e-13	3.73962e-11
AravalEVm015126t1	75.2277	23.3315	3.22642	7.23139	4.78082e-13	3.74059e-11
AravalEVm008151t1	76.5105	23.329	3.22641	7.23062	4.80801e-13	3.75015e-11
AravalEVm070567t1	102.986	23.3286	3.22629	7.2308	4.80147e-13	3.74894e-11
AravalEVm047682t1	186.541	23.3282	3.22612	7.23104	4.79297e-13	3.7462e-11
AravalEVm009347t1	74.8943	23.3263	3.22642	7.22976	4.83843e-13	3.76278e-11
AravalEVm002583t1	75.0556	23.3262	3.22642	7.22974	4.83923e-13	3.76278e-11
AravalEVm005693t1	74.7871	23.3241	3.22642	7.22907	4.86303e-13	3.77444e-11
AravalEVm022210t1	74.7093	23.3236	3.22642	7.22892	4.86834e-13	3.77444e-11
AravalEVm005488t1	74.7566	23.3234	3.08825	7.55229	4.27663e-14	6.36091e-12
AravalEVm038578t1	74.6739	23.3225	3.22642	7.22859	4.88034e-13	3.77909e-11
AravalEVm020006t1	74.6553	23.3218	3.22642	7.22838	4.88777e-13	3.78095e-11
AravalEVm024802t1	74.4915	23.3194	3.22643	7.22764	4.91464e-13	3.79392e-11
AravalEVm002401t2	74.3936	23.3173	3.22643	7.22698	4.93845e-13	3.80839e-11
AravalEVm015446t1	74.3574	23.3165	3.22643	7.22673	4.94767e-13	3.80893e-11
AravalEVm009750t1	74.5551	23.3164	3.22643	7.22668	4.9493e-13	3.80893e-11
AravalEVm003942t1	74.3062	23.3151	3.22643	7.2263	4.96316e-13	3.81569e-11
AravalEVm009042t1	75.8919	23.314	3.22642	7.22598	4.9749e-13	3.81875e-11
AravalEVm044068t1	74.1874	23.3139	3.1011	7.51794	5.56444e-14	7.7687e-12
AravalEVm009672t1	99.7434	23.313	3.2263	7.22592	4.97731e-13	3.81875e-11
AravalEVm024349t1	74.0431	23.3108	3.22643	7.22497	5.01223e-13	3.84162e-11
AravalEVm004303t1	76.2875	23.31	3.22641	7.22474	5.02047e-13	3.84401e-11
AravalEVm024512t1	74.0627	23.3096	3.1025	7.51317	5.77117e-14	7.98407e-12
AravalEVm013281t1	74.189	23.3085	3.22643	7.22424	5.03929e-13	3.85321e-11
AravalEVm000738t2	73.9213	23.3082	3.22643	7.22414	5.04275e-13	3.85321e-11
AravalEVm043158t1	75.0929	23.3052	3.22642	7.22324	5.07638e-13	3.87497e-11
AravalEVm001583t1	75.2516	23.3043	3.22642	7.22296	5.08677e-13	3.87896e-11
AravalEVm059861t1	75.6524	23.3021	3.22642	7.22229	5.1119e-13	3.89417e-11
AravalEVm007920t1	74.1416	23.3009	3.22643	7.2219	5.1266e-13	3.90141e-11
AravalEVm031231t4	73.4023	23.2967	3.22643	7.22057	5.17716e-13	3.93192e-11
AravalEVm021785t1	73.4633	23.2958	3.22643	7.22031	5.18698e-13	3.9354e-11
AravalEVm002311t2	157.432	23.2957	3.22616	7.22087	5.16571e-13	3.9272e-11
AravalEVm010857t2	73.302	23.2939	3.08414	7.55279	4.26036e-14	6.34929e-12
AravalEVm019516t1	73.2263	23.2934	3.22643	7.21955	5.216e-13	3.9512e-11
AravalEVm009401t1	73.0311	23.2932	3.22644	7.21949	5.21833e-13	3.9512e-11
AravalEVm013520t1	73.1606	23.2907	3.22643	7.2187	5.2488e-13	3.96229e-11
AravalEVm005628t1	75.182	23.2906	3.22642	7.21871	5.24828e-13	3.96229e-11
AravalEVm030408t2	126.284	23.29	3.22622	7.21898	5.23786e-13	3.96199e-11
AravalEVm003815t1	73.0229	23.2897	3.22644	7.21838	5.2609e-13	3.96743e-11
AravalEVm007865t1	72.9692	23.287	3.22644	7.21756	5.29285e-13	3.98753e-11
AravalEVm008044t1	72.721	23.285	3.22644	7.21694	5.31714e-13	3.99381e-11
AravalEVm067281t1	134.825	23.2837	3.2262	7.21707	5.31209e-13	3.99381e-11
AravalEVm007627t1	133.075	23.2836	3.2262	7.21702	5.31385e-13	3.99381e-11
AravalEVm019529t1	72.7454	23.2804	3.22644	7.21552	5.3728e-13	4.03158e-11
AravalEVm010248t1	72.3322	23.2776	3.22644	7.21463	5.40805e-13	4.05223e-11
AravalEVm024403t2	72.2864	23.2773	3.22644	7.21455	5.4111e-13	4.05223e-11
AravalEVm011754t3	159.083	23.2734	3.22616	7.21399	5.4337e-13	4.0651e-11
AravalEVm009863t1	72.171	23.2718	3.22644	7.21284	5.4798e-13	4.09144e-11
AravalEVm005265t2	124.941	23.2707	3.22622	7.213	5.47307e-13	4.09048e-11
AravalEVm008678t1	71.8597	23.2686	3.22644	7.21185	5.51988e-13	4.11727e-11
AravalEVm066201t3	72.0673	23.2681	3.22644	7.2117	5.52571e-13	4.11753e-11
AravalEVm014436t4	108.218	23.2663	3.22627	7.21153	5.5326e-13	4.11858e-11
AravalEVm041290t1	71.6433	23.2615	3.22645	7.20965	5.6096e-13	4.17177e-11
AravalEVm004001t1	71.493	23.2601	3.13091	7.42918	1.09272e-13	1.25691e-11
AravalEVm010209t1	71.4171	23.2592	3.22645	7.20893	5.63952e-13	4.18573e-11
AravalEVm011545t1	71.2736	23.2581	3.22645	7.20857	5.65431e-13	4.19256e-11
AravalEVm001278t2	71.2564	23.2568	3.22645	7.20818	5.67026e-13	4.20024e-11
AravalEVm007519t1	71.1003	23.2524	3.22645	7.2068	5.72809e-13	4.2389e-11
AravalEVm021914t1	71.063	23.2513	3.22645	7.20647	5.74229e-13	4.24108e-11
AravalEVm031920t1	71.238	23.2513	3.22645	7.20646	5.74232e-13	4.24108e-11
AravalEVm035246t2	70.9514	23.2491	3.22645	7.20577	5.77182e-13	4.25867e-11
AravalEVm024055t1	70.7723	23.2479	3.22645	7.2054	5.78756e-13	4.26407e-11
AravalEVm025863t1	70.9595	23.2476	3.22645	7.20533	5.79049e-13	4.26407e-11
AravalEVm024471t1	70.6432	23.2467	3.22645	7.20504	5.80267e-13	4.26885e-11
AravalEVm013279t5	70.7495	23.2455	3.22645	7.20467	5.81852e-13	4.27633e-11
AravalEVm065444t1	196.503	23.2452	3.10512	7.48607	7.09668e-14	9.35169e-12
AravalEVm014533t1	76.4972	23.2441	3.22641	7.20432	5.83328e-13	4.28105e-11
AravalEVm022751t1	70.7127	23.244	3.22645	7.20419	5.83914e-13	4.28105e-11
AravalEVm002223t1	70.6586	23.2438	3.22645	7.20412	5.84204e-13	4.28105e-11
AravalEVm013645t1	70.5229	23.2428	3.22645	7.20382	5.8549e-13	4.28629e-11
AravalEVm011550t1	70.7273	23.2415	3.22645	7.20341	5.87264e-13	4.29315e-11
AravalEVm006122t1	70.4535	23.2409	3.22645	7.20322	5.88063e-13	4.29315e-11
AravalEVm005402t2	70.5704	23.2401	3.22645	7.20299	5.89083e-13	4.29315e-11
AravalEVm018913t1	70.2914	23.2387	3.22646	7.20255	5.90977e-13	4.3013e-11
AravalEVm027073t2	70.2665	23.2376	3.22646	7.20222	5.92406e-13	4.30753e-11
AravalEVm019436t1	70.1131	23.2346	3.22646	7.20128	5.9649e-13	4.32792e-11
AravalEVm006150t1	70.1057	23.2344	3.22646	7.20122	5.9675e-13	4.32792e-11
AravalEVm050587t3	70.1777	23.2342	3.22646	7.20116	5.97014e-13	4.32792e-11
AravalEVm023424t1	70.3675	23.2336	3.22646	7.20096	5.97884e-13	4.32792e-11
AravalEVm007919t1	70.0914	23.2334	3.22646	7.20091	5.98124e-13	4.32792e-11
AravalEVm008216t1	70.0594	23.233	3.22646	7.20079	5.98667e-13	4.32792e-11
AravalEVm015064t1	70.1454	23.232	3.22646	7.20048	6.00009e-13	4.33345e-11
AravalEVm036681t1	70	23.2318	3.12359	7.43753	1.02588e-13	1.20311e-11
AravalEVm016826t1	69.7695	23.2284	3.22646	7.19935	6.04997e-13	4.36528e-11
AravalEVm017104t1	69.7757	23.2279	3.22646	7.19919	6.05732e-13	4.36638e-11
AravalEVm015760t1	167.013	23.2274	3.19684	7.26575	3.70987e-13	3.08931e-11
AravalEVm043121t1	70.0756	23.2274	3.22646	7.19905	6.06325e-13	4.36647e-11
AravalEVm007892t1	69.7143	23.225	3.22646	7.19828	6.0977e-13	4.37869e-11
AravalEVm042878t2	95.9147	23.2248	3.22631	7.19856	6.08507e-13	4.3738e-11
AravalEVm018950t1	108.644	23.2246	3.22627	7.1986	6.08317e-13	4.3738e-11
AravalEVm008189t1	69.7501	23.2239	3.22646	7.19795	6.11225e-13	4.38494e-11
AravalEVm045528t1	69.487	23.2221	3.22646	7.1974	6.13713e-13	4.39859e-11
AravalEVm020222t1	69.6013	23.2216	3.13015	7.41869	1.18284e-13	1.34208e-11
AravalEVm011449t6	121.599	23.2195	3.22623	7.19709	6.15115e-13	4.40443e-11
AravalEVm013386t1	108.3	23.2175	3.22627	7.1964	6.1822e-13	4.42245e-11
AravalEVm031456t1	69.1896	23.2136	3.22646	7.19474	6.25784e-13	4.4723e-11
AravalEVm009874t1	69.0491	23.213	3.22647	7.19455	6.2668e-13	4.47412e-11
AravalEVm031759t1	69.1466	23.2126	3.22646	7.19443	6.27229e-13	4.47412e-11
AravalEVm020447t1	68.9054	23.2108	3.22647	7.19389	6.29714e-13	4.48758e-11
AravalEVm006816t3	68.8087	23.208	3.22647	7.19301	6.33766e-13	4.51217e-11
AravalEVm028032t1	68.884	23.2074	3.22647	7.19281	6.34713e-13	4.51382e-11
AravalEVm006625t2	97.7701	23.2059	3.2263	7.19271	6.35199e-13	4.51382e-11
AravalEVm008162t1	68.5375	23.2014	3.14003	7.38889	1.48059e-13	1.57969e-11
AravalEVm013484t1	68.5587	23.1983	3.22647	7.19	6.47914e-13	4.59982e-11
AravalEVm001850t5	68.2515	23.1969	3.22647	7.18955	6.50039e-13	4.61055e-11
AravalEVm015363t1	68.3154	23.196	3.22647	7.18928	6.51336e-13	4.61539e-11
AravalEVm015204t1	68.2959	23.1954	3.22647	7.18909	6.52263e-13	4.6176e-11
AravalEVm031257t1	68.0354	23.1933	3.22647	7.18843	6.55411e-13	4.63343e-11
AravalEVm007789t2	68.2417	23.1931	3.22647	7.18836	6.55732e-13	4.63343e-11
AravalEVm020008t1	68.1309	23.1921	3.22647	7.18806	6.57193e-13	4.63939e-11
AravalEVm019807t1	68.0473	23.1911	3.22647	7.18774	6.58722e-13	4.64308e-11
AravalEVm015701t1	68.0116	23.1909	3.22647	7.18769	6.58952e-13	4.64308e-11
AravalEVm003249t1	68.1346	23.1893	3.22647	7.18719	6.61404e-13	4.65599e-11
AravalEVm061291t1	67.8153	23.1846	3.22648	7.18573	6.68482e-13	4.70141e-11
AravalEVm003142t3	68.0221	23.182	3.22647	7.18492	6.72448e-13	4.72488e-11
AravalEVm003213t1	70.683	23.1796	3.22645	7.18425	6.75792e-13	4.74394e-11
AravalEVm013399t1	67.4108	23.1786	3.1622	7.32989	2.3035e-13	2.18737e-11
AravalEVm009818t2	67.3852	23.1742	3.22648	7.18251	6.84449e-13	4.79167e-11
AravalEVm008648t1	67.5565	23.1741	3.22648	7.18247	6.84629e-13	4.79167e-11
AravalEVm010750t1	67.1263	23.1738	3.22648	7.18237	6.85144e-13	4.79167e-11
AravalEVm032068t1	66.9522	23.171	3.22648	7.1815	6.89527e-13	4.81445e-11
AravalEVm008887t1	66.9965	23.1701	3.22648	7.18122	6.90897e-13	4.81445e-11
AravalEVm015986t1	67.0105	23.1698	3.22648	7.18113	6.9137e-13	4.81445e-11
AravalEVm024242t2	67.1484	23.1696	3.22648	7.18108	6.91606e-13	4.81445e-11
AravalEVm012451t1	114.952	23.1684	3.22625	7.18123	6.90863e-13	4.81445e-11
AravalEVm025908t1	66.8257	23.1681	3.22648	7.18062	6.93979e-13	4.8265e-11
AravalEVm007183t1	66.9879	23.168	3.10494	7.46164	8.5454e-14	1.07156e-11
AravalEVm046542t1	66.8965	23.1676	3.22648	7.18046	6.94778e-13	4.82758e-11
AravalEVm085389t1	189.459	23.1674	3.12306	7.41816	1.18758e-13	1.34543e-11
AravalEVm010629t1	66.805	23.1664	3.22648	7.18006	6.96797e-13	4.83714e-11
AravalEVm022845t1	74.5039	23.1652	3.22643	7.17984	6.9791e-13	4.84039e-11
AravalEVm018246t1	66.7025	23.1645	3.22648	7.17949	6.99698e-13	4.84832e-11
AravalEVm012304t1	67.0251	23.1633	3.22648	7.17911	7.01678e-13	4.85755e-11
AravalEVm022969t1	66.7968	23.1611	3.22648	7.17845	7.05074e-13	4.87657e-11
AravalEVm000088t2	66.5077	23.1607	3.22649	7.1783	7.05836e-13	4.87735e-11
AravalEVm006285t1	66.3403	23.1577	3.22649	7.17738	7.10621e-13	4.9059e-11
AravalEVm002259t3	66.2744	23.1535	3.22649	7.17607	7.17421e-13	4.9483e-11
AravalEVm007482t1	66.0345	23.1512	3.22649	7.17536	7.21169e-13	4.96958e-11
AravalEVm013214t3	66.1774	23.1504	3.22649	7.17511	7.22484e-13	4.9729e-11
AravalEVm009175t1	66.025	23.1501	3.22649	7.17502	7.22974e-13	4.9729e-11
AravalEVm031669t2	65.9475	23.1487	3.22649	7.17456	7.25404e-13	4.98505e-11
AravalEVm015682t1	70.1735	23.1478	3.22646	7.17437	7.26405e-13	4.98736e-11
AravalEVm013352t1	178.127	23.1468	3.12222	7.41358	1.22939e-13	1.37824e-11
AravalEVm085186t1	65.7947	23.1466	3.22649	7.17392	7.28793e-13	4.99919e-11
AravalEVm052609t3	65.7532	23.1449	3.22649	7.17338	7.31677e-13	5.01439e-11
AravalEVm023838t1	65.8104	23.1434	3.22649	7.17294	7.34047e-13	5.02605e-11
AravalEVm013208t1	65.7149	23.1427	3.22649	7.17271	7.35263e-13	5.02838e-11
AravalEVm000474t2	65.8147	23.1422	3.22649	7.17256	7.36104e-13	5.02838e-11
AravalEVm028655t1	65.7256	23.142	3.22649	7.1725	7.36396e-13	5.02838e-11
AravalEVm012034t1	65.6338	23.14	3.22649	7.17186	7.39872e-13	5.04753e-11
AravalEVm014082t1	66.4216	23.1388	3.22649	7.17153	7.41653e-13	5.05508e-11
AravalEVm011156t1	65.3153	23.1383	3.2265	7.17134	7.42684e-13	5.05637e-11
AravalEVm030907t1	67.6661	23.1379	3.22648	7.17125	7.43187e-13	5.05637e-11
AravalEVm004440t1	65.3802	23.1356	3.2265	7.17049	7.47311e-13	5.07982e-11
AravalEVm006187t1	65.1719	23.1314	3.2265	7.16919	7.54454e-13	5.12374e-11
AravalEVm066717t1	65.1649	23.1305	3.2265	7.16893	7.55865e-13	5.12869e-11
AravalEVm032242t1	65.0015	23.1297	3.2265	7.16865	7.57382e-13	5.13434e-11
AravalEVm019186t2	64.9597	23.1281	3.2265	7.16818	7.59988e-13	5.14736e-11
AravalEVm020758t1	65.148	23.1275	3.2265	7.16799	7.61071e-13	5.15005e-11
AravalEVm017848t1	65.0462	23.127	3.2265	7.16782	7.62027e-13	5.15188e-11
AravalEVm023607t1	64.8006	23.1255	3.2265	7.16735	7.64638e-13	5.16488e-11
AravalEVm019921t1	143.87	23.1241	3.13205	7.38305	1.54702e-13	1.62096e-11
AravalEVm021823t1	64.7367	23.1231	3.2265	7.16661	7.68791e-13	5.18827e-11
AravalEVm027964t1	64.449	23.1167	3.2265	7.16462	7.80016e-13	5.2593e-11
AravalEVm019615t1	64.3831	23.1149	3.22651	7.16406	7.83249e-13	5.27636e-11
AravalEVm078192t1	64.2703	23.1131	3.22651	7.16351	7.86377e-13	5.29103e-11
AravalEVm020178t1	64.3043	23.1128	3.22651	7.16343	7.86836e-13	5.29103e-11
AravalEVm047629t1	64.4615	23.1119	3.10725	7.43806	1.02175e-13	1.20311e-11
AravalEVm033953t1	64.1078	23.1096	3.22651	7.16243	7.92597e-13	5.325e-11
AravalEVm021309t1	64.1123	23.1087	3.22651	7.16213	7.9433e-13	5.32809e-11
AravalEVm005333t2	64.0688	23.1086	3.22651	7.1621	7.94475e-13	5.32809e-11
AravalEVm003127t2	65.8813	23.1076	3.22649	7.16185	7.95975e-13	5.33339e-11
AravalEVm006170t1	64.786	23.1016	3.2265	7.15995	8.07067e-13	5.40185e-11
AravalEVm017707t1	63.7563	23.1011	3.22651	7.15976	8.08162e-13	5.40185e-11
AravalEVm022440t1	63.75	23.101	3.22651	7.15973	8.08349e-13	5.40185e-11
AravalEVm065558t2	63.516	23.1004	3.22651	7.15955	8.09449e-13	5.40438e-11
AravalEVm028469t1	63.664	23.099	3.22651	7.15914	8.11856e-13	5.41564e-11
AravalEVm014294t3	63.6686	23.096	3.22651	7.1582	8.17411e-13	5.44786e-11
AravalEVm004043t1	63.3317	23.0916	3.22652	7.15682	8.25719e-13	5.49835e-11
AravalEVm029996t1	63.3776	23.09	3.22651	7.15633	8.28634e-13	5.51107e-11
AravalEVm018864t1	63.1401	23.0875	3.22652	7.15556	8.33326e-13	5.52975e-11
AravalEVm003605t2	63.255	23.0874	3.22652	7.15551	8.33622e-13	5.52975e-11
AravalEVm011305t1	63.1376	23.0871	3.22652	7.15543	8.34115e-13	5.52975e-11
AravalEVm036434t1	63.0371	23.0864	3.22652	7.1552	8.35491e-13	5.53351e-11
AravalEVm033467t1	62.9271	23.0832	3.09714	7.45307	9.11954e-14	1.12109e-11
AravalEVm047715t2	95.0712	23.0825	3.22632	7.15446	8.40058e-13	5.55444e-11
AravalEVm057213t1	62.6186	23.0779	3.22652	7.15255	8.51778e-13	5.62698e-11
AravalEVm027799t1	62.705	23.0769	3.22652	7.15226	8.53594e-13	5.63402e-11
AravalEVm081470t2	62.5753	23.0757	3.22652	7.15188	8.55946e-13	5.64327e-11
AravalEVm013689t2	62.5295	23.0757	3.08851	7.47145	7.9316e-14	1.01978e-11
AravalEVm027428t1	64.6704	23.0753	3.2265	7.1518	8.56497e-13	5.64327e-11
AravalEVm028913t1	62.6599	23.075	3.22652	7.15167	8.57298e-13	5.64359e-11
AravalEVm023395t1	62.6194	23.0739	3.22652	7.15133	8.59393e-13	5.65243e-11
AravalEVm017195t1	62.493	23.0735	3.11822	7.39958	1.36618e-13	1.48835e-11
AravalEVm029193t1	62.5466	23.0728	3.22652	7.15097	8.61638e-13	5.66223e-11
AravalEVm007407t1	63.568	23.0719	3.22651	7.15072	8.63215e-13	5.66764e-11
AravalEVm003638t3	174.604	23.0708	3.12458	7.38366	1.54001e-13	1.62007e-11
AravalEVm091405t1	62.4349	23.0691	3.22652	7.14983	8.68879e-13	5.69985e-11
AravalEVm000772t2	62.2688	23.0684	3.22653	7.1496	8.70293e-13	5.70156e-11
AravalEVm005862t1	62.3394	23.0682	3.22652	7.14955	8.70658e-13	5.70156e-11
AravalEVm026661t1	62.1785	23.0671	3.22653	7.1492	8.72871e-13	5.71107e-11
AravalEVm037858t1	62.2116	23.0665	3.22653	7.14901	8.7404e-13	5.71374e-11
AravalEVm003478t1	62.1457	23.0652	3.22653	7.14862	8.76542e-13	5.72512e-11
AravalEVm024527t1	139.392	23.0647	3.13799	7.35015	1.97985e-13	1.93382e-11
AravalEVm018635t1	62.0491	23.0639	3.22653	7.1482	8.79201e-13	5.73251e-11
AravalEVm009357t1	61.9777	23.0622	3.22653	7.14769	8.82477e-13	5.74788e-11
AravalEVm005487t1	62.0569	23.0619	3.22653	7.1476	8.83088e-13	5.74788e-11
AravalEVm042190t1	61.954	23.0588	3.22653	7.14662	8.89419e-13	5.77986e-11
AravalEVm021501t1	61.8667	23.0587	3.22653	7.1466	8.89541e-13	5.77986e-11
AravalEVm059882t1	61.9117	23.0576	3.22653	7.14626	8.91756e-13	5.78643e-11
AravalEVm002083t2	61.7324	23.0575	3.22653	7.14621	8.92093e-13	5.78643e-11
AravalEVm016865t1	61.712	23.0563	3.22653	7.14586	8.94326e-13	5.79591e-11
AravalEVm035415t1	61.5689	23.0531	3.22653	7.14485	9.00966e-13	5.82916e-11
AravalEVm019161t1	61.6971	23.0524	3.22653	7.14463	9.02371e-13	5.82916e-11
AravalEVm010462t3	61.6029	23.0514	3.22653	7.14432	9.04406e-13	5.83606e-11
AravalEVm013866t1	123.262	23.0504	3.22623	7.14469	9.01986e-13	5.82916e-11
AravalEVm026037t1	122.711	23.0501	3.22623	7.1446	9.02561e-13	5.82916e-11
AravalEVm011866t2	61.4564	23.0485	3.22653	7.14341	9.10423e-13	5.86397e-11
AravalEVm073396t1	61.4661	23.0481	3.22653	7.14331	9.11073e-13	5.86397e-11
AravalEVm040227t1	89.9603	23.0478	3.22634	7.14363	9.08965e-13	5.86044e-11
AravalEVm019942t1	61.3398	23.047	3.22653	7.14295	9.13513e-13	5.87464e-11
AravalEVm005440t1	174.892	23.045	3.12158	7.38247	1.55375e-13	1.62316e-11
AravalEVm003957t1	170.292	23.0445	3.1283	7.36647	1.75206e-13	1.75937e-11
AravalEVm013238t3	61.1652	23.0445	3.22654	7.14217	9.18716e-13	5.90305e-11
AravalEVm020196t1	95.2284	23.0413	3.0773	7.4875	7.01987e-14	9.27998e-12
AravalEVm025072t1	61.0954	23.0391	3.22654	7.14052	9.29791e-13	5.964e-11
AravalEVm028999t3	60.9044	23.0384	3.22654	7.1403	9.3129e-13	5.96852e-11
AravalEVm003460t1	60.8597	23.0361	3.22654	7.13957	9.36255e-13	5.99523e-11
AravalEVm016247t1	60.6517	23.0328	3.22654	7.13853	9.43333e-13	6.0354e-11
AravalEVm015553t1	60.798	23.0321	3.22654	7.13833	9.44745e-13	6.03929e-11
AravalEVm010109t1	60.7861	23.0315	3.22654	7.13815	9.45965e-13	6.04195e-11
AravalEVm013224t1	62.4503	23.0307	3.22652	7.13795	9.47363e-13	6.04574e-11
AravalEVm007396t1	60.6157	23.0283	3.22654	7.13716	9.52813e-13	6.07536e-11
AravalEVm029522t1	60.6215	23.0271	3.22654	7.13677	9.55475e-13	6.08494e-11
AravalEVm003391t1	60.3783	23.0269	3.22654	7.13671	9.55937e-13	6.08494e-11
AravalEVm024470t1	60.3224	23.025	3.22654	7.13611	9.601e-13	6.10101e-11
AravalEVm003837t2	60.3733	23.0237	3.22654	7.13572	9.62795e-13	6.10101e-11
AravalEVm013801t1	60.2311	23.0234	3.22655	7.13561	9.63557e-13	6.10101e-11
AravalEVm023191t1	60.2132	23.0233	3.22655	7.1356	9.63675e-13	6.10101e-11
AravalEVm003660t1	60.3375	23.0233	3.22654	7.13559	9.63741e-13	6.10101e-11
AravalEVm053389t1	60.2174	23.0231	3.22655	7.13553	9.64147e-13	6.10101e-11
AravalEVm059807t1	89.8892	23.0228	3.22634	7.13589	9.616e-13	6.10101e-11
AravalEVm024343t1	60.1562	23.0217	3.22655	7.13508	9.67277e-13	6.11566e-11
AravalEVm004415t1	60.1095	23.0205	3.22655	7.13471	9.6992e-13	6.12722e-11
AravalEVm038045t1	60.0446	23.0192	3.22655	7.13433	9.72614e-13	6.13907e-11
AravalEVm020391t1	60.1455	23.018	3.22655	7.13393	9.75412e-13	6.14763e-11
AravalEVm041985t1	59.9573	23.0169	3.22655	7.13361	9.77704e-13	6.15326e-11
AravalEVm012719t1	60.0557	23.0167	3.22655	7.13355	9.78138e-13	6.15326e-11
AravalEVm018757t1	85.409	23.0166	3.22636	7.13391	9.75606e-13	6.14763e-11
AravalEVm030362t1	60.0784	23.0154	3.22655	7.13314	9.81067e-13	6.16652e-11
AravalEVm011084t1	59.9123	23.0144	3.22655	7.13282	9.8333e-13	6.17557e-11
AravalEVm010495t1	59.9379	23.0139	3.22655	7.13267	9.84403e-13	6.17602e-11
AravalEVm031325t1	59.8076	23.0136	3.22655	7.13258	9.85045e-13	6.17602e-11
AravalEVm018866t1	59.8717	23.0127	3.22655	7.1323	9.87034e-13	6.17818e-11
AravalEVm003968t3	61.1343	23.0127	3.22654	7.13232	9.86887e-13	6.17818e-11
AravalEVm001792t1	165.453	23.0127	3.14723	7.31204	2.63119e-13	2.38977e-11
AravalEVm006870t1	59.8593	23.012	3.22655	7.13207	9.88702e-13	6.18219e-11
AravalEVm007393t1	59.834	23.0117	3.22655	7.13198	9.89321e-13	6.18219e-11
AravalEVm003876t3	61.8599	23.0104	3.22653	7.13161	9.92004e-13	6.19324e-11
AravalEVm015884t1	59.6587	23.0099	3.22655	7.13141	9.93448e-13	6.19324e-11
AravalEVm019614t1	64.7976	23.0091	3.2265	7.13128	9.94402e-13	6.19324e-11
AravalEVm026066t1	59.6062	23.0087	3.22655	7.13105	9.96043e-13	6.19324e-11
AravalEVm018875t1	59.7997	23.0087	3.22655	7.13105	9.96049e-13	6.19324e-11
AravalEVm009787t1	59.606	23.0085	3.22655	7.13099	9.9649e-13	6.19324e-11
AravalEVm027317t1	59.7501	23.0083	3.22655	7.13094	9.96861e-13	6.19324e-11
AravalEVm029146t1	59.4888	23.006	3.22655	7.13021	1.00219e-12	6.22121e-11
AravalEVm010910t1	59.315	23.0017	3.22656	7.12888	1.01191e-12	6.27638e-11
AravalEVm010372t1	59.234	22.9998	3.22656	7.12828	1.01628e-12	6.29828e-11
AravalEVm005137t1	59.1765	22.9986	3.22656	7.12792	1.01895e-12	6.3096e-11
AravalEVm012661t1	59.1529	22.9979	3.22656	7.12769	1.02068e-12	6.30988e-11
AravalEVm024923t1	65.9731	22.9976	3.22649	7.12775	1.02026e-12	6.30988e-11
AravalEVm017497t1	59.1211	22.9972	3.22656	7.12748	1.02222e-12	6.31422e-11
AravalEVm006066t2	58.9925	22.9925	3.22656	7.126	1.03327e-12	6.37724e-11
AravalEVm051309t3	58.9116	22.9916	3.22656	7.12572	1.03539e-12	6.3851e-11
AravalEVm040656t1	59.0243	22.9911	3.22656	7.12559	1.03637e-12	6.38585e-11
AravalEVm009083t1	58.9594	22.9902	3.22656	7.12531	1.03844e-12	6.39337e-11
AravalEVm035071t1	58.7662	22.9889	3.22656	7.1249	1.04158e-12	6.40224e-11
AravalEVm025689t1	58.8198	22.9884	3.22656	7.12473	1.04287e-12	6.40489e-11
AravalEVm004321t3	58.7383	22.9876	3.22656	7.12449	1.04468e-12	6.41076e-11
AravalEVm002929t1	106.118	22.9873	3.22627	7.12504	1.04051e-12	6.40086e-11
AravalEVm017395t1	58.5574	22.9836	3.22656	7.12325	1.05412e-12	6.45289e-11
AravalEVm018575t1	58.6414	22.9829	3.22656	7.12303	1.05579e-12	6.45788e-11
AravalEVm017048t1	58.4527	22.9815	3.22656	7.1226	1.05906e-12	6.46735e-11
AravalEVm023270t1	58.4321	22.9808	3.22657	7.12236	1.06093e-12	6.47246e-11
AravalEVm007412t1	58.4419	22.9805	3.22657	7.12227	1.06162e-12	6.47246e-11
AravalEVm024378t1	58.4052	22.9797	3.22657	7.12202	1.06353e-12	6.47278e-11
AravalEVm039823t1	58.3552	22.9794	3.22657	7.12195	1.06414e-12	6.47278e-11
AravalEVm007906t2	58.5223	22.9793	3.22656	7.12191	1.06443e-12	6.47278e-11
AravalEVm015975t1	58.391	22.979	3.22657	7.12182	1.06512e-12	6.47278e-11
AravalEVm061891t2	58.2692	22.977	3.22657	7.1212	1.0699e-12	6.49652e-11
AravalEVm002663t1	58.2478	22.976	3.22657	7.12087	1.07252e-12	6.50677e-11
AravalEVm008636t1	58.2356	22.9756	3.22657	7.12076	1.07332e-12	6.50677e-11
AravalEVm015816t1	58.1744	22.9744	3.22657	7.12037	1.07636e-12	6.51468e-11
AravalEVm043576t2	109.395	22.9724	3.22626	7.12045	1.07578e-12	6.51468e-11
AravalEVm010277t1	58.016	22.9703	3.22657	7.11912	1.08619e-12	6.56366e-11
AravalEVm018133t1	57.983	22.9696	3.22657	7.11889	1.08796e-12	6.56903e-11
AravalEVm026497t1	69.1138	22.9696	3.22647	7.11912	1.0862e-12	6.56366e-11
AravalEVm039629t1	57.9218	22.969	3.22657	7.11872	1.08936e-12	6.5722e-11
AravalEVm023656t1	57.9392	22.9684	3.22657	7.11853	1.09083e-12	6.5758e-11
AravalEVm002822t1	58.0686	22.9677	3.22657	7.1183	1.09269e-12	6.58173e-11
AravalEVm009498t1	57.8432	22.9672	3.22657	7.11814	1.09394e-12	6.58399e-11
AravalEVm040676t1	57.8482	22.9658	3.22657	7.1177	1.09742e-12	6.59647e-11
AravalEVm018054t1	57.8539	22.9656	3.22657	7.11766	1.09777e-12	6.59647e-11
AravalEVm076558t1	57.7465	22.9634	3.22657	7.11696	1.10333e-12	6.62455e-11
AravalEVm022195t1	57.6165	22.9613	3.22657	7.1163	1.10859e-12	6.63904e-11
AravalEVm024289t1	57.5963	22.961	3.22657	7.11622	1.10928e-12	6.63904e-11
AravalEVm013874t1	57.4797	22.9582	3.22658	7.11534	1.1164e-12	6.67638e-11
AravalEVm022768t1	57.5068	22.9579	3.12516	7.34616	2.03986e-13	1.98727e-11
AravalEVm016714t2	57.4581	22.9574	3.22658	7.11508	1.11845e-12	6.6833e-11
AravalEVm016945t1	57.4436	22.955	3.22658	7.11436	1.12437e-12	6.70193e-11
AravalEVm059878t1	57.33	22.9547	3.22658	7.11426	1.12514e-12	6.70193e-11
AravalEVm020285t1	100.715	22.9537	3.22629	7.11457	1.12261e-12	6.69752e-11
AravalEVm010801t1	57.3176	22.9536	3.22658	7.11391	1.12804e-12	6.71387e-11
AravalEVm001977t1	57.3791	22.9531	3.22658	7.11377	1.12916e-12	6.71523e-11
AravalEVm085392t1	57.332	22.9527	3.22658	7.11365	1.13012e-12	6.71563e-11
AravalEVm024018t1	57.0831	22.9482	3.22658	7.11223	1.14185e-12	6.77996e-11
AravalEVm087833t1	57.0095	22.9466	3.22658	7.11174	1.1459e-12	6.79866e-11
AravalEVm003161t1	56.9928	22.9456	3.22658	7.11142	1.14853e-12	6.80569e-11
AravalEVm007123t1	56.9916	22.9454	3.22658	7.11138	1.1489e-12	6.80569e-11
AravalEVm007993t2	57.0009	22.9446	3.22658	7.11113	1.15099e-12	6.81273e-11
AravalEVm008082t1	56.9908	22.9442	3.22658	7.111	1.15206e-12	6.81368e-11
AravalEVm013652t1	56.8949	22.9426	3.22658	7.1105	1.1562e-12	6.83277e-11
AravalEVm011801t3	56.8119	22.9419	3.22658	7.11028	1.15808e-12	6.8385e-11
AravalEVm067427t1	65.7393	22.9405	3.22649	7.11005	1.16001e-12	6.84453e-11
AravalEVm024810t1	56.6939	22.9389	3.22658	7.10933	1.16604e-12	6.8747e-11
AravalEVm004956t1	61.7897	22.9368	3.22653	7.10883	1.17032e-12	6.89453e-11
AravalEVm022190t1	56.631	22.9367	3.22659	7.10865	1.17184e-12	6.89804e-11
AravalEVm007273t1	56.6566	22.9353	3.22659	7.10822	1.17549e-12	6.91217e-11
AravalEVm032365t1	56.6156	22.9351	3.22659	7.10815	1.17608e-12	6.91217e-11
AravalEVm006809t1	56.765	22.9324	3.22658	7.10733	1.18311e-12	6.94807e-11
AravalEVm039363t1	56.4209	22.931	3.22659	7.1069	1.18681e-12	6.96017e-11
AravalEVm037244t2	56.359	22.9309	3.22659	7.10684	1.18728e-12	6.96017e-11
AravalEVm017469t1	56.3662	22.9308	3.14502	7.29116	3.07305e-13	2.69968e-11
AravalEVm015680t1	56.4423	22.9306	3.22659	7.10676	1.18795e-12	6.96017e-11
AravalEVm013890t2	56.3674	22.9295	3.22659	7.10642	1.19091e-12	6.96665e-11
AravalEVm006774t1	56.3635	22.9289	3.22659	7.10623	1.19258e-12	6.97098e-11
AravalEVm043352t1	117.317	22.9273	3.22624	7.1065	1.19018e-12	6.96665e-11
AravalEVm007642t1	56.2381	22.9272	3.22659	7.10572	1.197e-12	6.99137e-11
AravalEVm004320t1	161.2	22.9244	3.133	7.31707	2.53446e-13	2.32157e-11
AravalEVm014328t8	56.2836	22.9232	3.22659	7.10446	1.20792e-12	7.04419e-11
AravalEVm006362t1	56.0098	22.9226	3.22659	7.10427	1.20961e-12	7.04747e-11
AravalEVm023719t1	117.209	22.9198	3.22624	7.10418	1.21036e-12	7.04747e-11
AravalEVm019339t1	55.8664	22.9184	3.22659	7.10297	1.22102e-12	7.09375e-11
AravalEVm008494t3	55.8667	22.9184	3.22659	7.10296	1.22114e-12	7.09375e-11
AravalEVm050586t1	55.8895	22.918	3.22659	7.10285	1.22211e-12	7.09389e-11
AravalEVm022430t1	118.988	22.9178	3.22624	7.10356	1.21581e-12	7.07373e-11
AravalEVm006387t1	55.803	22.916	3.2266	7.10221	1.22779e-12	7.12136e-11
AravalEVm020192t1	55.8172	22.9153	3.2266	7.10201	1.22953e-12	7.12599e-11
AravalEVm011548t1	55.7741	22.9142	3.2266	7.10166	1.23263e-12	7.13334e-11
AravalEVm017271t1	55.7356	22.9138	3.2266	7.10154	1.23377e-12	7.13334e-11
AravalEVm063230t1	55.8003	22.9135	3.2266	7.10144	1.23459e-12	7.13334e-11
AravalEVm013512t1	55.6918	22.911	3.2266	7.10067	1.24151e-12	7.16772e-11
AravalEVm078161t1	120.648	22.9109	3.22623	7.10144	1.2346e-12	7.13334e-11
AravalEVm009600t1	55.6928	22.9094	3.2266	7.10016	1.24608e-12	7.18863e-11
AravalEVm021784t1	55.6001	22.9083	3.2266	7.09984	1.24905e-12	7.20021e-11
AravalEVm007399t1	55.5036	22.908	3.2266	7.09973	1.25002e-12	7.20026e-11
AravalEVm016874t1	55.4019	22.9057	3.2266	7.09902	1.25641e-12	7.23152e-11
AravalEVm030365t2	55.3497	22.9051	3.2266	7.09883	1.25813e-12	7.23588e-11
AravalEVm037584t2	55.7319	22.9022	3.2266	7.09795	1.26619e-12	7.27347e-11
AravalEVm005685t1	55.3148	22.9021	3.2266	7.09791	1.2666e-12	7.27347e-11
AravalEVm040862t1	55.337	22.9012	3.2266	7.09762	1.2692e-12	7.28281e-11
AravalEVm000744t2	55.228	22.9006	3.2266	7.09745	1.27082e-12	7.28653e-11
AravalEVm013717t1	55.1789	22.8998	3.2266	7.09719	1.2732e-12	7.29465e-11
AravalEVm044079t1	54.9809	22.895	3.22661	7.0957	1.28701e-12	7.36691e-11
AravalEVm017103t2	56.3572	22.8946	3.22659	7.09561	1.28778e-12	7.36691e-11
AravalEVm010272t1	54.8201	22.891	3.22661	7.09444	1.29876e-12	7.41842e-11
AravalEVm069233t1	114.376	22.8898	3.22625	7.09488	1.29468e-12	7.40078e-11
AravalEVm033916t1	54.8449	22.8884	3.22661	7.09365	1.30617e-12	7.45507e-11
AravalEVm024474t1	54.6915	22.8875	3.22661	7.09335	1.30906e-12	7.46222e-11
AravalEVm018496t1	54.6373	22.8871	3.22661	7.09322	1.31024e-12	7.46222e-11
AravalEVm017772t1	54.6592	22.887	3.22661	7.09321	1.3104e-12	7.46222e-11
AravalEVm007236t1	54.4829	22.8832	3.22661	7.09204	1.32154e-12	7.51427e-11
AravalEVm028070t2	82.865	22.8832	3.22637	7.09255	1.31662e-12	7.49198e-11
AravalEVm012955t1	54.3133	22.879	3.22661	7.09072	1.33412e-12	7.58004e-11
AravalEVm042382t1	54.2457	22.8774	3.22661	7.09021	1.33909e-12	7.60255e-11
AravalEVm008734t1	54.1703	22.8737	3.22662	7.08908	1.35004e-12	7.65894e-11
AravalEVm002959t1	54.1448	22.8731	3.22662	7.08887	1.35212e-12	7.66014e-11
AravalEVm020955t1	54.1699	22.873	3.22662	7.08885	1.35229e-12	7.66014e-11
AravalEVm026965t1	54.1161	22.8723	3.22662	7.08865	1.3543e-12	7.66572e-11
AravalEVm018132t1	54.0355	22.8709	3.22662	7.08821	1.35859e-12	7.68423e-11
AravalEVm012132t1	54.0157	22.8698	3.22662	7.08786	1.36206e-12	7.69453e-11
AravalEVm011353t1	53.9888	22.8697	3.22662	7.08781	1.36246e-12	7.69453e-11
AravalEVm015010t1	53.964	22.8684	3.22662	7.08741	1.36642e-12	7.70578e-11
AravalEVm043868t1	53.947	22.8684	3.22662	7.0874	1.36651e-12	7.70578e-11
AravalEVm000587t1	53.8841	22.868	3.22662	7.08729	1.36761e-12	7.70625e-11
AravalEVm052229t1	53.8874	22.8662	3.22662	7.08674	1.37311e-12	7.73141e-11
AravalEVm009211t1	53.7667	22.8648	3.22662	7.0863	1.37746e-12	7.75011e-11
AravalEVm015080t1	53.6882	22.8625	3.22662	7.08557	1.38472e-12	7.7851e-11
AravalEVm011599t1	53.622	22.8599	3.22662	7.08477	1.39277e-12	7.81869e-11
AravalEVm020182t1	53.5417	22.8584	3.22662	7.08429	1.39754e-12	7.8396e-11
AravalEVm025114t1	96.4465	22.8581	3.22631	7.08489	1.39152e-12	7.81748e-11
AravalEVm038561t2	53.7104	22.858	3.22662	7.08419	1.39859e-12	7.83961e-11
AravalEVm013459t1	53.4487	22.8549	3.22663	7.08322	1.40838e-12	7.88425e-11
AravalEVm012882t2	53.5572	22.8548	3.22662	7.0832	1.40865e-12	7.88425e-11
AravalEVm036736t1	53.3697	22.8533	3.22663	7.08274	1.41335e-12	7.90468e-11
AravalEVm030187t1	53.2866	22.8504	3.22663	7.08183	1.42263e-12	7.95066e-11
AravalEVm004941t1	53.54	22.848	3.22662	7.08108	1.4304e-12	7.98809e-11
AravalEVm049133t1	53.0719	22.8454	3.22663	7.08026	1.43884e-12	8.02927e-11
AravalEVm030093t1	53.0566	22.8446	3.22663	7.08002	1.44131e-12	8.03235e-11
AravalEVm011996t1	53.0256	22.8442	3.22663	7.07991	1.44251e-12	8.03235e-11
AravalEVm002596t1	53.028	22.8442	3.22663	7.0799	1.4426e-12	8.03235e-11
AravalEVm084522t1	52.9673	22.843	3.22663	7.07953	1.44644e-12	8.04781e-11
AravalEVm006759t1	58.0454	22.8415	3.22657	7.07919	1.44998e-12	8.06148e-11
AravalEVm035621t6	52.8791	22.8409	3.22663	7.07888	1.45324e-12	8.07365e-11
AravalEVm014193t4	52.7617	22.8378	3.22663	7.0779	1.46353e-12	8.1219e-11
AravalEVm016119t1	52.7398	22.8376	3.22663	7.07784	1.4642e-12	8.1219e-11
AravalEVm035730t1	52.9594	22.8373	3.22663	7.07774	1.4652e-12	8.1219e-11
AravalEVm004056t1	52.753	22.837	3.22663	7.07764	1.46625e-12	8.1219e-11
AravalEVm033893t2	52.7551	22.8364	3.22663	7.07748	1.46804e-12	8.12581e-11
AravalEVm003666t1	52.7199	22.8359	3.22664	7.07732	1.46966e-12	8.1288e-11
AravalEVm019989t1	52.6918	22.8354	3.22664	7.07714	1.47157e-12	8.13335e-11
AravalEVm016436t1	52.6406	22.8345	3.22664	7.07687	1.47448e-12	8.14346e-11
AravalEVm040874t3	52.5757	22.8332	3.22664	7.07646	1.47888e-12	8.16178e-11
AravalEVm028644t1	52.5752	22.8325	3.22664	7.07624	1.48119e-12	8.16761e-11
AravalEVm026036t1	52.5541	22.8322	3.22664	7.07615	1.48211e-12	8.16761e-11
AravalEVm054034t5	52.5513	22.8313	3.22664	7.07587	1.48516e-12	8.17612e-11
AravalEVm008954t1	52.5173	22.8311	3.22664	7.07581	1.48584e-12	8.17612e-11
AravalEVm075727t1	52.4483	22.8287	3.22664	7.07506	1.49384e-12	8.21415e-11
AravalEVm026723t1	52.3713	22.8272	3.22664	7.07459	1.4989e-12	8.23595e-11
AravalEVm009729t1	52.3469	22.8265	3.22664	7.07437	1.50125e-12	8.24174e-11
AravalEVm012893t1	52.3119	22.8261	3.22664	7.07426	1.5025e-12	8.24174e-11
AravalEVm014063t1	52.2965	22.8252	3.22664	7.07399	1.50536e-12	8.24718e-11
AravalEVm028285t1	52.2517	22.8248	3.22664	7.07385	1.50696e-12	8.24718e-11
AravalEVm004658t2	52.2799	22.8246	3.22664	7.07379	1.50753e-12	8.24718e-11
AravalEVm019940t1	52.3022	22.8241	3.22664	7.07363	1.50927e-12	8.25068e-11
AravalEVm019479t1	52.2493	22.8233	3.22664	7.07339	1.51197e-12	8.25942e-11
AravalEVm021307t3	52.1092	22.8214	3.22664	7.07281	1.51827e-12	8.28783e-11
AravalEVm028424t1	52.0694	22.8198	3.22664	7.0723	1.52384e-12	8.31219e-11
AravalEVm007262t1	52.1174	22.8184	3.22664	7.07186	1.52874e-12	8.3312e-11
AravalEVm071844t1	52.0368	22.8181	3.22664	7.07178	1.52955e-12	8.3312e-11
AravalEVm003160t2	51.9681	22.8172	3.22665	7.07148	1.53291e-12	8.34349e-11
AravalEVm012785t4	51.9629	22.8166	3.22665	7.07132	1.53467e-12	8.34702e-11
AravalEVm019981t2	51.917	22.8159	3.22665	7.07109	1.53725e-12	8.35497e-11
AravalEVm000360t3	51.8506	22.8141	3.22665	7.07053	1.54344e-12	8.3765e-11
AravalEVm005203t1	51.9267	22.8132	3.22665	7.07025	1.54652e-12	8.38717e-11
AravalEVm026105t2	87.4687	22.8123	3.22635	7.07063	1.54226e-12	8.37618e-11
AravalEVm004296t1	51.7383	22.8099	3.22665	7.06923	1.55792e-12	8.44292e-11
AravalEVm005398t1	51.7795	22.809	3.22665	7.06893	1.5613e-12	8.45403e-11
AravalEVm033481t1	51.8047	22.8087	3.22665	7.06885	1.56223e-12	8.45403e-11
AravalEVm008667t3	51.6768	22.8075	3.22665	7.06847	1.56654e-12	8.47127e-11
AravalEVm004579t1	51.6105	22.8044	3.22665	7.06753	1.57718e-12	8.52268e-11
AravalEVm012862t1	51.5868	22.8041	3.22665	7.06741	1.57849e-12	8.5236e-11
AravalEVm023871t1	51.509	22.8027	3.22665	7.06697	1.58353e-12	8.54469e-11
AravalEVm010177t1	51.4421	22.8021	3.22665	7.06679	1.58553e-12	8.54936e-11
AravalEVm019211t1	51.4135	22.8004	3.22665	7.06627	1.59154e-12	8.57557e-11
AravalEVm019154t1	51.3498	22.7996	3.22665	7.06601	1.59454e-12	8.5856e-11
AravalEVm005955t1	51.363	22.799	3.22665	7.06584	1.59649e-12	8.58994e-11
AravalEVm040075t1	51.3528	22.7956	3.22665	7.06478	1.60867e-12	8.64308e-11
AravalEVm025818t1	51.1877	22.7944	3.22666	7.0644	1.61315e-12	8.65759e-11
AravalEVm053685t1	51.2059	22.7942	3.22666	7.06435	1.61367e-12	8.65759e-11
AravalEVm034590t1	102.137	22.7938	3.22629	7.06503	1.60585e-12	8.63413e-11
AravalEVm032193t1	51.1666	22.793	3.22666	7.06398	1.61797e-12	8.67444e-11
AravalEVm041955t1	51.0736	22.7916	3.22666	7.06352	1.6234e-12	8.69735e-11
AravalEVm004897t1	51.0781	22.7908	3.22666	7.0633	1.62598e-12	8.70025e-11
AravalEVm020521t1	50.9612	22.7905	3.22666	7.06318	1.62732e-12	8.70025e-11
AravalEVm008962t1	51.0843	22.7904	3.22666	7.06317	1.62742e-12	8.70025e-11
AravalEVm001252t2	50.9657	22.7897	3.22666	7.06294	1.6302e-12	8.70497e-11
AravalEVm023813t6	50.9649	22.7896	3.22666	7.0629	1.63062e-12	8.70497e-11
AravalEVm013711t1	50.8901	22.7866	3.22666	7.06199	1.64139e-12	8.75625e-11
AravalEVm006640t1	50.8595	22.786	3.22666	7.0618	1.64359e-12	8.76178e-11
AravalEVm037148t1	50.7622	22.7849	3.22666	7.06144	1.64789e-12	8.77846e-11
AravalEVm030924t1	50.7854	22.7845	3.22666	7.06133	1.64912e-12	8.77879e-11
AravalEVm049418t3	51.3858	22.7801	3.22665	7.05998	1.66531e-12	8.85869e-11
AravalEVm017750t1	50.5253	22.7785	3.22667	7.05945	1.67166e-12	8.88617e-11
AravalEVm007230t1	50.536	22.7775	3.22667	7.05913	1.67545e-12	8.90001e-11
AravalEVm017031t1	50.4524	22.776	3.22667	7.05869	1.68079e-12	8.91632e-11
AravalEVm006900t1	50.4773	22.776	3.22667	7.05867	1.68101e-12	8.91632e-11
AravalEVm019221t1	50.5322	22.7757	3.22667	7.05858	1.68208e-12	8.91632e-11
AravalEVm003773t6	116.359	22.7723	3.22624	7.05845	1.68371e-12	8.91867e-11
AravalEVm016317t1	50.2975	22.7714	3.22667	7.05723	1.69854e-12	8.98007e-11
AravalEVm000003t2	50.2502	22.7708	3.22667	7.05706	1.70058e-12	8.98007e-11
AravalEVm053724t1	50.3246	22.7707	3.22667	7.05702	1.70108e-12	8.98007e-11
AravalEVm007553t1	50.4256	22.77	3.22667	7.0568	1.70379e-12	8.98007e-11
AravalEVm050892t1	50.3271	22.7699	3.22667	7.05678	1.70408e-12	8.98007e-11
AravalEVm009212t1	50.3234	22.7698	3.22667	7.05675	1.70437e-12	8.98007e-11
AravalEVm050950t1	50.3167	22.7697	3.22667	7.05671	1.70486e-12	8.98007e-11
AravalEVm049471t1	50.1745	22.7682	3.22667	7.05624	1.71073e-12	9.00464e-11
AravalEVm040494t1	50.079	22.7659	3.22667	7.05552	1.71951e-12	9.04454e-11
AravalEVm023202t1	50.0504	22.7644	3.22667	7.05505	1.72535e-12	9.06892e-11
AravalEVm008301t1	49.9908	22.7633	3.22667	7.05472	1.72944e-12	9.07769e-11
AravalEVm002824t2	50.0264	22.7622	3.22667	7.05439	1.73364e-12	9.09337e-11
AravalEVm043110t1	112.04	22.7535	3.22626	7.05262	1.75585e-12	9.20342e-11
AravalEVm053384t1	49.7865	22.753	3.22668	7.05153	1.76963e-12	9.26059e-11
AravalEVm019030t2	49.6331	22.7528	3.22668	7.05147	1.77036e-12	9.26059e-11
AravalEVm017615t1	49.6642	22.7528	3.22668	7.05146	1.77045e-12	9.26059e-11
AravalEVm007012t2	49.6792	22.7516	3.22668	7.0511	1.77514e-12	9.27218e-11
AravalEVm017295t1	49.6792	22.7516	3.22668	7.0511	1.77514e-12	9.27218e-11
AravalEVm019281t1	49.5541	22.7508	3.22668	7.05085	1.7783e-12	9.27893e-11
AravalEVm042605t1	49.5351	22.7506	3.22668	7.05078	1.77913e-12	9.27893e-11
AravalEVm015604t1	49.6212	22.7504	3.22668	7.05071	1.78013e-12	9.27893e-11
AravalEVm024567t1	49.4921	22.7496	3.22668	7.05047	1.7831e-12	9.28795e-11
AravalEVm020647t1	49.4198	22.7459	3.22668	7.04931	1.79801e-12	9.35912e-11
AravalEVm017040t1	59.2302	22.745	3.1354	7.25424	4.03919e-13	3.31568e-11
AravalEVm006913t1	49.2398	22.7424	3.22669	7.04824	1.812e-12	9.40405e-11
AravalEVm059410t1	49.2343	22.7423	3.22669	7.04819	1.8126e-12	9.40405e-11
AravalEVm002156t1	49.3471	22.7422	3.22668	7.04816	1.81293e-12	9.40405e-11
AravalEVm015678t1	49.2726	22.7422	3.22669	7.04815	1.81306e-12	9.40405e-11
AravalEVm011559t1	49.2373	22.7418	3.22669	7.04804	1.81461e-12	9.40405e-11
AravalEVm017937t1	49.2395	22.7416	3.22669	7.04797	1.81541e-12	9.40405e-11
AravalEVm017562t1	49.2014	22.7403	3.22669	7.04758	1.8205e-12	9.42396e-11
AravalEVm005402t1	49.8549	22.737	3.22668	7.04656	1.83399e-12	9.48726e-11
AravalEVm040515t1	48.8717	22.7313	3.22669	7.04476	1.85784e-12	9.59935e-11
AravalEVm039141t1	48.8463	22.7312	3.22669	7.04473	1.85822e-12	9.59935e-11
AravalEVm009086t1	48.8157	22.7302	3.22669	7.04443	1.86227e-12	9.60706e-11
AravalEVm011894t1	49.978	22.7302	3.22667	7.04446	1.86186e-12	9.60706e-11
AravalEVm024984t1	48.7683	22.7272	3.22669	7.04349	1.87479e-12	9.65841e-11
AravalEVm053697t1	50.2978	22.7263	3.22667	7.04327	1.87779e-12	9.66718e-11
AravalEVm017411t1	48.641	22.7247	3.2267	7.04273	1.88515e-12	9.6918e-11
AravalEVm015911t2	48.6776	22.7244	3.22669	7.04261	1.88666e-12	9.69292e-11
AravalEVm017079t1	48.6783	22.7238	3.22669	7.04242	1.88923e-12	9.69951e-11
AravalEVm048309t1	48.5773	22.7229	3.2267	7.04217	1.89272e-12	9.71079e-11
AravalEVm017474t1	48.5141	22.7219	3.2267	7.04184	1.89722e-12	9.72722e-11
AravalEVm004181t1	122.474	22.7218	3.22623	7.04283	1.88376e-12	9.69128e-11
AravalEVm007660t1	48.4478	22.7196	3.2267	7.04111	1.90708e-12	9.76747e-11
AravalEVm006443t4	48.3968	22.7181	3.2267	7.04067	1.91319e-12	9.78104e-11
AravalEVm027534t1	48.4194	22.7176	3.2267	7.04052	1.9153e-12	9.78104e-11
AravalEVm023279t1	48.3711	22.7176	3.2267	7.0405	1.91553e-12	9.78104e-11
AravalEVm052302t1	85.5885	22.7167	3.22636	7.04098	1.90889e-12	9.76747e-11
AravalEVm012956t1	99.1055	22.7163	3.2263	7.04098	1.90897e-12	9.76747e-11
AravalEVm002695t4	48.146	22.7105	3.2267	7.0383	1.94596e-12	9.92287e-11
AravalEVm016185t1	48.132	22.7102	3.2267	7.03821	1.94727e-12	9.92287e-11
AravalEVm000028t1	48.1044	22.7089	3.2267	7.03782	1.95277e-12	9.94417e-11
AravalEVm019041t1	110.84	22.7072	3.22626	7.03823	1.94693e-12	9.92287e-11
AravalEVm002377t3	48.0339	22.7053	3.22671	7.03667	1.96885e-12	1.00193e-10
AravalEVm010724t3	48.039	22.7042	3.22671	7.03633	1.97367e-12	1.0037e-10
AravalEVm041132t4	47.7733	22.7006	3.22671	7.03521	1.98968e-12	1.00961e-10
AravalEVm049615t3	47.7871	22.7004	3.22671	7.03516	1.99037e-12	1.00961e-10
AravalEVm005292t1	47.988	22.7003	3.22671	7.03514	1.99068e-12	1.00961e-10
AravalEVm017272t3	87.1059	22.6991	3.22635	7.03552	1.98522e-12	1.00889e-10
AravalEVm014246t1	47.7481	22.6988	3.22671	7.03466	1.99742e-12	1.01235e-10
AravalEVm014493t1	47.6919	22.6976	3.22671	7.03427	2.00305e-12	1.01452e-10
AravalEVm019176t2	47.6558	22.6968	3.22671	7.03403	2.00646e-12	1.01556e-10
AravalEVm000941t1	75.0462	22.6941	3.22642	7.03384	2.00923e-12	1.01628e-10
AravalEVm017397t1	47.5757	22.6929	3.22671	7.03282	2.02395e-12	1.02303e-10
AravalEVm024140t1	47.5179	22.6925	3.22671	7.0327	2.02578e-12	1.02327e-10
AravalEVm055744t1	47.5442	22.6912	3.22671	7.03228	2.03182e-12	1.02496e-10
AravalEVm000390t4	47.4495	22.6909	3.22671	7.03219	2.03311e-12	1.02496e-10
AravalEVm017021t1	47.5034	22.6909	3.22671	7.03219	2.03322e-12	1.02496e-10
AravalEVm026525t4	47.6507	22.6901	3.22671	7.03196	2.03645e-12	1.0259e-10
AravalEVm008839t7	47.4308	22.6895	3.22672	7.03178	2.03919e-12	1.02659e-10
AravalEVm076578t1	47.3738	22.6884	3.22672	7.03142	2.04447e-12	1.02856e-10
AravalEVm012513t1	113.396	22.6882	3.12249	7.26606	3.70116e-13	3.08548e-11
AravalEVm024598t1	47.5108	22.6854	3.22671	7.03049	2.05808e-12	1.03472e-10
AravalEVm004841t1	47.2125	22.6839	3.22672	7.03003	2.06482e-12	1.03741e-10
AravalEVm009203t1	47.196	22.6831	3.22672	7.02978	2.06854e-12	1.03858e-10
AravalEVm004957t1	82.6148	22.6789	3.22638	7.02922	2.07688e-12	1.04207e-10
AravalEVm007664t1	47.064	22.6783	3.22672	7.02828	2.0909e-12	1.04841e-10
AravalEVm011553t1	47.0116	22.6778	3.22672	7.02812	2.0933e-12	1.04891e-10
AravalEVm017105t2	47.0307	22.6772	3.22672	7.02793	2.09618e-12	1.04965e-10
AravalEVm010467t2	46.9049	22.6746	3.22672	7.02713	2.10831e-12	1.05502e-10
AravalEVm017394t1	46.8763	22.6731	3.22672	7.02668	2.11512e-12	1.05729e-10
AravalEVm026278t1	46.8507	22.673	3.22673	7.02664	2.11565e-12	1.05729e-10
AravalEVm014188t1	46.8524	22.6726	3.22672	7.02652	2.1175e-12	1.05751e-10
AravalEVm038777t1	46.7577	22.6707	3.22673	7.02592	2.12663e-12	1.06137e-10
AravalEVm013252t1	46.6754	22.668	3.22673	7.02506	2.13968e-12	1.06717e-10
AravalEVm033770t1	46.5612	22.6642	3.22673	7.02388	2.15791e-12	1.07555e-10
AravalEVm037156t1	46.5575	22.6635	3.22673	7.02366	2.16131e-12	1.07653e-10
AravalEVm003379t1	46.685	22.6595	3.22673	7.02244	2.18033e-12	1.08445e-10
AravalEVm014407t1	46.4364	22.6594	3.22673	7.02241	2.18075e-12	1.08445e-10
AravalEVm069831t3	46.3934	22.6592	3.22673	7.02234	2.18189e-12	1.08445e-10
AravalEVm006262t2	46.3934	22.6588	3.22673	7.02222	2.18369e-12	1.08445e-10
AravalEVm057597t1	46.3683	22.6587	3.22673	7.02217	2.18443e-12	1.08445e-10
AravalEVm013154t1	46.3954	22.6554	3.22673	7.02117	2.20025e-12	1.09158e-10
AravalEVm010069t1	46.237	22.6542	3.22674	7.02077	2.20645e-12	1.09393e-10
AravalEVm018742t1	46.2506	22.6535	3.22674	7.02056	2.20978e-12	1.09486e-10
AravalEVm016832t1	46.2725	22.6531	3.22674	7.02043	2.21184e-12	1.09516e-10
AravalEVm011663t1	46.2283	22.6517	3.22674	7.01999	2.21884e-12	1.0979e-10
AravalEVm009205t1	46.0373	22.6484	3.22674	7.01897	2.23507e-12	1.10448e-10
AravalEVm022221t1	46.0087	22.6481	3.22674	7.01887	2.23671e-12	1.10456e-10
AravalEVm002539t1	46.0155	22.6475	3.22674	7.01868	2.23971e-12	1.10531e-10
AravalEVm027431t1	45.9851	22.6469	3.22674	7.0185	2.24267e-12	1.10605e-10
AravalEVm022466t1	45.9698	22.6461	3.22674	7.01824	2.24674e-12	1.10733e-10
AravalEVm029267t1	45.9607	22.6457	3.22674	7.01813	2.2485e-12	1.10747e-10
AravalEVm034452t1	46.0566	22.6449	3.22674	7.0179	2.25227e-12	1.10825e-10
AravalEVm018845t1	45.8896	22.6448	3.22674	7.01785	2.25304e-12	1.10825e-10
AravalEVm078318t1	45.8908	22.6439	3.22674	7.01756	2.25772e-12	1.10924e-10
AravalEVm018478t1	46.0075	22.6438	3.22674	7.01755	2.25799e-12	1.10924e-10
AravalEVm023290t1	46.2875	22.6434	3.22673	7.01742	2.26e-12	1.1095e-10
AravalEVm014134t1	45.8212	22.6419	3.22674	7.01696	2.26748e-12	1.11171e-10
AravalEVm006897t1	45.9834	22.6414	3.22674	7.0168	2.27001e-12	1.11208e-10
AravalEVm037015t1	45.7849	22.6412	3.22674	7.01673	2.27119e-12	1.11208e-10
AravalEVm012896t1	90.3544	22.6396	3.22634	7.01713	2.26474e-12	1.1111e-10
AravalEVm021091t1	45.8193	22.6389	3.22674	7.01603	2.28264e-12	1.11696e-10
AravalEVm004211t2	45.6631	22.6373	3.22675	7.01552	2.29089e-12	1.12027e-10
AravalEVm020356t1	45.5823	22.635	3.22675	7.01481	2.3026e-12	1.12484e-10
AravalEVm012960t1	45.6017	22.6348	3.22675	7.01475	2.30364e-12	1.12484e-10
AravalEVm040507t1	45.5616	22.6346	3.22675	7.01468	2.30473e-12	1.12484e-10
AravalEVm022217t1	45.6002	22.634	3.22675	7.01451	2.30757e-12	1.1255e-10
AravalEVm019140t1	45.7001	22.6335	3.22675	7.01433	2.3105e-12	1.12619e-10
AravalEVm009738t1	105.706	22.6296	3.22628	7.01416	2.31336e-12	1.12686e-10
AravalEVm011409t1	45.397	22.6293	3.22675	7.01303	2.33209e-12	1.13524e-10
AravalEVm003606t2	45.3873	22.6289	3.22675	7.0129	2.33432e-12	1.13559e-10
AravalEVm006007t1	45.3598	22.6276	3.22675	7.01249	2.34119e-12	1.13807e-10
AravalEVm009435t2	45.3565	22.6273	3.22675	7.01241	2.34245e-12	1.13807e-10
AravalEVm028710t1	45.3304	22.6269	3.22675	7.01227	2.34485e-12	1.13851e-10
AravalEVm072532t4	45.3207	22.6263	3.22675	7.01209	2.34784e-12	1.13884e-10
AravalEVm026608t1	45.299	22.6259	3.22675	7.01196	2.35001e-12	1.13884e-10
AravalEVm006214t3	45.3956	22.6258	3.22675	7.01196	2.35009e-12	1.13884e-10
AravalEVm027072t1	45.4194	22.6248	3.22675	7.01163	2.35566e-12	1.1408e-10
AravalEVm020775t1	45.2349	22.6233	3.22675	7.01118	2.36319e-12	1.14371e-10
AravalEVm008905t3	45.1417	22.6216	3.22676	7.01065	2.37217e-12	1.14658e-10
AravalEVm039245t1	45.1009	22.6201	3.22676	7.01018	2.38017e-12	1.1497e-10
AravalEVm009958t1	45.0972	22.619	3.22676	7.00984	2.38598e-12	1.15177e-10
AravalEVm014936t1	44.9736	22.6164	3.22676	7.00901	2.40008e-12	1.15777e-10
AravalEVm005115t5	44.9938	22.6161	3.22676	7.00893	2.40149e-12	1.15777e-10
AravalEVm010791t1	44.9037	22.6141	3.22676	7.00831	2.41219e-12	1.16218e-10
AravalEVm047147t1	44.892	22.6133	3.22676	7.00804	2.41677e-12	1.16353e-10
AravalEVm014551t1	44.9243	22.6128	3.22676	7.00791	2.41904e-12	1.16353e-10
AravalEVm014764t1	44.8664	22.6127	3.22676	7.00788	2.41963e-12	1.16353e-10
AravalEVm086781t1	44.8937	22.6117	3.22676	7.00756	2.42513e-12	1.16511e-10
AravalEVm026055t1	44.8096	22.6113	3.22676	7.00742	2.42749e-12	1.16511e-10
AravalEVm076492t1	44.8189	22.6113	3.22676	7.00742	2.42757e-12	1.16511e-10
AravalEVm029030t4	44.8048	22.6091	3.22676	7.00674	2.43928e-12	1.16998e-10
AravalEVm032829t1	44.7259	22.6086	3.22676	7.00659	2.44189e-12	1.16998e-10
AravalEVm035699t1	44.7535	22.6085	3.22676	7.00657	2.44238e-12	1.16998e-10
AravalEVm027528t1	44.7672	22.6062	3.22676	7.00584	2.45516e-12	1.17535e-10
AravalEVm032896t1	44.6206	22.6049	3.22677	7.00544	2.46213e-12	1.17793e-10
AravalEVm001711t2	44.5697	22.603	3.22677	7.00483	2.47279e-12	1.18228e-10
AravalEVm027930t1	44.6431	22.6021	3.22676	7.00458	2.47726e-12	1.18366e-10
AravalEVm020474t1	44.481	22.6007	3.22677	7.00413	2.48521e-12	1.18608e-10
AravalEVm063260t1	44.4727	22.6006	3.22677	7.00411	2.48569e-12	1.18608e-10
AravalEVm013822t1	44.3979	22.5986	3.22677	7.00348	2.4969e-12	1.19002e-10
AravalEVm003108t2	89.5005	22.5974	3.22634	7.00403	2.48705e-12	1.18608e-10
AravalEVm014328t1	44.3214	22.5961	3.22677	7.00271	2.51055e-12	1.19576e-10
AravalEVm044699t1	44.3748	22.5942	3.22677	7.00211	2.52128e-12	1.20011e-10
AravalEVm007389t1	44.207	22.5923	3.22677	7.00152	2.53209e-12	1.20339e-10
AravalEVm012345t1	44.2043	22.5922	3.22677	7.00149	2.53257e-12	1.20339e-10
AravalEVm010913t1	46.7328	22.5918	3.22673	7.00147	2.53297e-12	1.20339e-10
AravalEVm009488t1	44.2751	22.5918	3.22677	7.00135	2.53508e-12	1.20363e-10
AravalEVm022344t1	44.1559	22.5905	3.22677	7.00097	2.54197e-12	1.20614e-10
AravalEVm023511t1	44.1237	22.5899	3.22677	7.00076	2.54583e-12	1.20721e-10
AravalEVm039251t1	44.1361	22.5893	3.22677	7.00057	2.54916e-12	1.20803e-10
AravalEVm025709t1	44.0369	22.5873	3.22678	6.99994	2.56063e-12	1.2127e-10
AravalEVm014570t7	44.0383	22.5862	3.22678	6.99963	2.5664e-12	1.21466e-10
AravalEVm029820t3	43.9923	22.5849	3.22678	6.9992	2.57419e-12	1.2175e-10
AravalEVm036254t1	43.9628	22.5846	3.22678	6.99913	2.57563e-12	1.2175e-10
AravalEVm034606t1	45.5716	22.5835	3.22675	6.99884	2.58097e-12	1.21926e-10
AravalEVm029020t2	43.9464	22.5822	3.22678	6.99837	2.58951e-12	1.22202e-10
AravalEVm049178t1	43.9098	22.5821	3.22678	6.99834	2.59008e-12	1.22202e-10
AravalEVm002610t1	44.1224	22.5812	3.22677	6.99806	2.59522e-12	1.22368e-10
AravalEVm016500t1	44.0824	22.5788	3.22678	6.99733	2.60894e-12	1.22938e-10
AravalEVm028886t1	43.7494	22.5771	3.22678	6.99677	2.61928e-12	1.23348e-10
AravalEVm031334t1	43.6977	22.5749	3.22678	6.9961	2.6319e-12	1.23864e-10
AravalEVm009494t5	43.6448	22.5739	3.22678	6.99577	2.63799e-12	1.24073e-10
AravalEVm037045t1	43.6154	22.5735	3.22678	6.99567	2.6399e-12	1.24085e-10
AravalEVm015198t1	43.6137	22.5727	3.22678	6.99542	2.64462e-12	1.24156e-10
AravalEVm025259t1	43.7569	22.5727	3.22678	6.99542	2.64471e-12	1.24156e-10
AravalEVm007051t1	43.6167	22.5718	3.22678	6.99513	2.65013e-12	1.24332e-10
AravalEVm033338t1	43.4844	22.5696	3.22679	6.99444	2.66319e-12	1.2479e-10
AravalEVm023863t1	43.4819	22.5691	3.22679	6.9943	2.66591e-12	1.24839e-10
AravalEVm020434t1	44.0608	22.5679	3.22678	6.99393	2.67284e-12	1.25086e-10
AravalEVm022422t2	88.534	22.5673	3.22635	6.99468	2.65859e-12	1.24651e-10
AravalEVm005938t1	43.3635	22.563	3.22679	6.9924	2.70214e-12	1.26174e-10
AravalEVm025475t1	43.467	22.5628	3.22679	6.99235	2.70327e-12	1.26174e-10
AravalEVm027551t1	43.3983	22.5627	3.22679	6.99232	2.70374e-12	1.26174e-10
AravalEVm049774t1	43.2872	22.5625	3.22679	6.99225	2.70512e-12	1.26174e-10
AravalEVm012033t1	43.3916	22.5623	3.22679	6.9922	2.70618e-12	1.26174e-10
AravalEVm040888t1	88.9764	22.5619	3.22634	6.99303	2.69011e-12	1.25816e-10
AravalEVm038639t1	43.2138	22.5604	3.22679	6.9916	2.71767e-12	1.26631e-10
AravalEVm020746t1	43.1253	22.558	3.22679	6.99083	2.73263e-12	1.2725e-10
AravalEVm003630t1	43.1096	22.5569	3.22679	6.99051	2.73889e-12	1.27462e-10
AravalEVm039661t1	43.0335	22.5548	3.2268	6.98984	2.75195e-12	1.27991e-10
AravalEVm021478t1	42.9955	22.5537	3.2268	6.98951	2.75851e-12	1.28216e-10
AravalEVm010529t1	42.9781	22.5529	3.2268	6.98925	2.76354e-12	1.28241e-10
AravalEVm008339t1	42.9773	22.5528	3.2268	6.98922	2.76417e-12	1.28241e-10
AravalEVm036061t1	42.9446	22.5519	3.2268	6.98893	2.77e-12	1.28432e-10
AravalEVm022332t1	42.9165	22.5502	3.2268	6.98841	2.78019e-12	1.28825e-10
AravalEVm019908t1	86.0746	22.5501	3.22636	6.98933	2.76209e-12	1.28241e-10
AravalEVm037792t1	42.8681	22.5494	3.2268	6.98815	2.78535e-12	1.28985e-10
AravalEVm021996t1	42.8433	22.5488	3.2268	6.98797	2.78898e-12	1.29073e-10
AravalEVm010231t1	42.8598	22.5483	3.2268	6.98782	2.7919e-12	1.29129e-10
AravalEVm017350t1	42.8809	22.5478	3.2268	6.98768	2.79478e-12	1.29182e-10
AravalEVm015798t2	42.9107	22.5454	3.2268	6.98691	2.80998e-12	1.29767e-10
AravalEVm007186t2	42.7457	22.5452	3.2268	6.98687	2.81087e-12	1.29767e-10
AravalEVm005324t1	42.6793	22.5433	3.2268	6.98627	2.82295e-12	1.30175e-10
AravalEVm010089t1	42.6981	22.5433	3.2268	6.98626	2.82318e-12	1.30175e-10
AravalEVm016178t3	42.63	22.5398	3.2268	6.98518	2.84481e-12	1.31092e-10
AravalEVm017214t2	42.5666	22.5386	3.22681	6.98481	2.85244e-12	1.31363e-10
AravalEVm049135t1	42.4885	22.5374	3.22681	6.98442	2.86027e-12	1.31642e-10
AravalEVm032655t1	42.5029	22.5369	3.22681	6.98429	2.86309e-12	1.31691e-10
AravalEVm012258t4	42.5257	22.5362	3.22681	6.98406	2.86775e-12	1.31825e-10
AravalEVm043141t3	42.4493	22.5353	3.22681	6.98377	2.87366e-12	1.32016e-10
AravalEVm005110t1	42.4219	22.5348	3.22681	6.98363	2.87657e-12	1.32033e-10
AravalEVm022612t2	42.4273	22.5345	3.22681	6.98354	2.87841e-12	1.32033e-10
AravalEVm032402t1	42.4306	22.5344	3.22681	6.98349	2.87929e-12	1.32033e-10
AravalEVm007537t2	42.3725	22.5312	3.22681	6.98249	2.89997e-12	1.329e-10
AravalEVm026609t1	42.4136	22.5306	3.22681	6.98232	2.90339e-12	1.32975e-10
AravalEVm029714t1	42.2734	22.5299	3.22681	6.98208	2.90836e-12	1.33122e-10
AravalEVm010468t1	42.2354	22.5283	3.22681	6.98161	2.91826e-12	1.33412e-10
AravalEVm008348t1	42.2055	22.5272	3.22681	6.98124	2.92593e-12	1.33639e-10
AravalEVm023976t1	42.1812	22.527	3.22681	6.9812	2.92679e-12	1.33639e-10
AravalEVm004081t4	42.1479	22.5254	3.22682	6.9807	2.93715e-12	1.34031e-10
AravalEVm045554t4	42.2602	22.5251	3.22681	6.98059	2.93937e-12	1.34051e-10
AravalEVm005232t1	117.766	22.5249	3.19278	7.05496	1.72656e-12	9.06893e-11
AravalEVm019247t1	42.1551	22.5243	3.22681	6.98036	2.94434e-12	1.34196e-10
AravalEVm047683t2	42.0439	22.5228	3.22682	6.97988	2.95443e-12	1.34493e-10
AravalEVm028189t1	42.0405	22.5214	3.22682	6.97946	2.96316e-12	1.34808e-10
AravalEVm002467t2	42.0158	22.5211	3.22682	6.97934	2.9657e-12	1.34842e-10
AravalEVm033495t1	84.8186	22.5203	3.22636	6.9801	2.94972e-12	1.3436e-10
AravalEVm015200t1	42.0121	22.5195	3.22682	6.97886	2.97577e-12	1.35152e-10
AravalEVm006284t1	42.1431	22.5194	3.22682	6.97885	2.97612e-12	1.35152e-10
AravalEVm003367t1	41.9026	22.5174	3.22682	6.97819	2.99007e-12	1.35704e-10
AravalEVm058502t1	197.97	22.5159	3.16384	7.11662	1.10608e-12	6.63576e-11
AravalEVm027318t1	41.8524	22.5154	3.22682	6.97758	3.00303e-12	1.3621e-10
AravalEVm037983t1	41.7524	22.5134	3.22682	6.97694	3.01673e-12	1.36749e-10
AravalEVm015613t1	41.7751	22.512	3.22682	6.97653	3.02568e-12	1.37072e-10
AravalEVm015530t1	41.744	22.5097	3.22682	6.97581	3.04118e-12	1.37691e-10
AravalEVm011143t1	41.6155	22.5083	3.22683	6.97536	3.05097e-12	1.38051e-10
AravalEVm016757t1	44.3501	22.5076	3.22677	6.97527	3.05293e-12	1.38056e-10
AravalEVm021211t3	41.5705	22.5065	3.22683	6.97481	3.06282e-12	1.38271e-10
AravalEVm009096t1	41.6547	22.5064	3.22683	6.97479	3.06319e-12	1.38271e-10
AravalEVm034786t1	41.555	22.5056	3.22683	6.97452	3.06906e-12	1.38452e-10
AravalEVm026849t7	85.4529	22.5039	3.22636	6.97501	3.05848e-12	1.38224e-10
AravalEVm022128t2	41.6214	22.5039	3.22683	6.974	3.08046e-12	1.38883e-10
AravalEVm023954t1	41.5095	22.5026	3.22683	6.9736	3.08942e-12	1.39096e-10
AravalEVm023653t1	41.4665	22.5024	3.22683	6.97352	3.09098e-12	1.39096e-10
AravalEVm004988t1	41.5071	22.5019	3.22683	6.97339	3.09404e-12	1.39096e-10
AravalEVm029684t1	41.4835	22.5015	3.22683	6.97327	3.09664e-12	1.39096e-10
AravalEVm029560t1	41.4324	22.5015	3.22683	6.97325	3.09695e-12	1.39096e-10
AravalEVm003636t1	41.4427	22.5014	3.22683	6.97322	3.0976e-12	1.39096e-10
AravalEVm021576t3	41.4121	22.5011	3.22683	6.97314	3.09952e-12	1.39096e-10
AravalEVm025459t1	41.2974	22.4975	3.22683	6.972	3.12468e-12	1.4012e-10
AravalEVm001874t2	95.5102	22.4975	3.22631	6.97311	3.1e-12	1.39096e-10
AravalEVm036789t1	41.3636	22.4969	3.22683	6.97184	3.12828e-12	1.40198e-10
AravalEVm024051t1	41.3231	22.4957	3.22683	6.97146	3.13669e-12	1.40448e-10
AravalEVm010765t1	41.2261	22.4947	3.22683	6.97112	3.14424e-12	1.40661e-10
AravalEVm043643t1	41.2589	22.4934	3.22683	6.97072	3.15317e-12	1.40977e-10
AravalEVm016740t1	41.1428	22.4924	3.22684	6.97042	3.16005e-12	1.412e-10
AravalEVm045028t1	41.2089	22.4917	3.22684	6.97021	3.16461e-12	1.41274e-10
AravalEVm014349t1	41.1167	22.4916	3.22684	6.97016	3.16577e-12	1.41274e-10
AravalEVm030372t1	41.2701	22.4913	3.22683	6.97009	3.16734e-12	1.41274e-10
AravalEVm010847t1	41.0456	22.4878	3.22684	6.96898	3.19254e-12	1.42313e-10
AravalEVm013603t1	41.2321	22.4864	3.22683	6.96856	3.20194e-12	1.42648e-10
AravalEVm014682t2	40.988	22.486	3.22684	6.96843	3.20493e-12	1.42696e-10
AravalEVm038600t1	40.9732	22.4848	3.22684	6.96806	3.21348e-12	1.42992e-10
AravalEVm039410t1	40.9719	22.4837	3.22684	6.96772	3.22115e-12	1.43164e-10
AravalEVm026404t2	40.919	22.4815	3.22684	6.96703	3.23702e-12	1.43784e-10
AravalEVm008085t3	40.8143	22.4806	3.22684	6.96674	3.24363e-12	1.43901e-10
AravalEVm029534t1	40.8004	22.4804	3.22684	6.96668	3.24508e-12	1.43901e-10
AravalEVm002469t4	40.8704	22.4798	3.22684	6.9665	3.24923e-12	1.43901e-10
AravalEVm039429t1	40.8884	22.4797	3.22684	6.96646	3.25014e-12	1.43901e-10
AravalEVm028932t1	40.773	22.4791	3.22685	6.96629	3.25407e-12	1.43901e-10
AravalEVm003137t5	40.8074	22.4786	3.22684	6.96612	3.2579e-12	1.43901e-10
AravalEVm024815t3	40.7579	22.4785	3.22685	6.96608	3.25897e-12	1.43901e-10
AravalEVm012507t1	40.8392	22.4784	3.22684	6.96606	3.25929e-12	1.43901e-10
AravalEVm019829t1	40.7437	22.4782	3.22685	6.966	3.26072e-12	1.43901e-10
AravalEVm014122t1	40.727	22.478	3.22685	6.96592	3.26265e-12	1.43901e-10
AravalEVm007986t5	40.8499	22.4776	3.22684	6.96583	3.26484e-12	1.43913e-10
AravalEVm084446t1	40.7357	22.4767	3.22685	6.96552	3.27189e-12	1.44107e-10
AravalEVm017935t1	40.6701	22.4765	3.22685	6.96547	3.27308e-12	1.44107e-10
AravalEVm012352t1	81.135	22.4765	3.22638	6.96647	3.24992e-12	1.43901e-10
AravalEVm011013t1	40.7395	22.4756	3.22685	6.9652	3.27946e-12	1.4424e-10
AravalEVm007641t1	83.6962	22.4755	3.22637	6.96618	3.25657e-12	1.43901e-10
AravalEVm056814t1	40.8036	22.4753	3.22684	6.96509	3.28185e-12	1.4424e-10
AravalEVm014360t1	40.6229	22.4743	3.22685	6.96479	3.28904e-12	1.44395e-10
AravalEVm017105t1	84.2069	22.472	3.22637	6.96511	3.28156e-12	1.4424e-10
AravalEVm057215t1	40.5947	22.4712	3.22685	6.96382	3.31168e-12	1.45296e-10
AravalEVm030917t1	81.3755	22.471	3.22638	6.96478	3.28922e-12	1.44395e-10
AravalEVm053735t1	63.0191	22.4679	3.1085	7.22789	4.90558e-13	3.79082e-11
AravalEVm032374t1	40.5005	22.4678	3.22685	6.96277	3.33643e-12	1.46284e-10
AravalEVm032394t2	40.4821	22.4674	3.22685	6.96263	3.33981e-12	1.46284e-10
AravalEVm005560t2	40.4258	22.4667	3.22685	6.96241	3.34506e-12	1.46284e-10
AravalEVm005569t1	40.3933	22.4667	3.22685	6.9624	3.34515e-12	1.46284e-10
AravalEVm010358t1	42.2316	22.4666	3.22681	6.96247	3.34348e-12	1.46284e-10
AravalEVm021593t1	40.4115	22.4666	3.22685	6.96237	3.34588e-12	1.46284e-10
AravalEVm042729t1	40.3926	22.4655	3.22685	6.96204	3.35389e-12	1.46488e-10
AravalEVm008544t1	40.3749	22.4653	3.22685	6.96198	3.35524e-12	1.46488e-10
AravalEVm025484t1	40.3648	22.4651	3.22685	6.96193	3.35641e-12	1.46488e-10
AravalEVm028082t1	42.3408	22.4642	3.22681	6.96172	3.3614e-12	1.46621e-10
AravalEVm026751t1	40.2941	22.4617	3.22686	6.96086	3.3821e-12	1.47438e-10
AravalEVm011296t1	40.2978	22.4609	3.22686	6.96062	3.38787e-12	1.47577e-10
AravalEVm006178t1	42.6435	22.4604	3.2268	6.96056	3.3892e-12	1.47577e-10
AravalEVm022641t1	40.3073	22.4601	3.22686	6.96036	3.39403e-12	1.47701e-10
AravalEVm028399t1	40.1419	22.458	3.22686	6.95971	3.40979e-12	1.48234e-10
AravalEVm003350t1	40.8454	22.4578	3.22684	6.95969	3.41022e-12	1.48234e-10
AravalEVm017169t1	40.1121	22.4561	3.22686	6.95911	3.42426e-12	1.48672e-10
AravalEVm092341t1	80.6218	22.4536	3.22639	6.95938	3.41777e-12	1.48476e-10
AravalEVm007167t2	82.7833	22.452	3.22638	6.9589	3.42938e-12	1.4874e-10
AravalEVm006903t1	84.0117	22.4519	3.22637	6.95888	3.42978e-12	1.4874e-10
AravalEVm019815t1	39.9505	22.4509	3.22686	6.95749	3.46398e-12	1.50137e-10
AravalEVm007889t1	40.0927	22.4494	3.22686	6.95705	3.47461e-12	1.5051e-10
AravalEVm027568t1	39.9942	22.4486	3.22686	6.95678	3.48129e-12	1.50713e-10
AravalEVm004047t1	39.7873	22.445	3.22687	6.95566	3.50927e-12	1.51837e-10
AravalEVm012620t2	39.7413	22.443	3.22687	6.95503	3.52495e-12	1.52427e-10
AravalEVm010988t1	39.6936	22.4419	3.22687	6.95468	3.53361e-12	1.52714e-10
AravalEVm013910t2	39.7366	22.4406	3.22687	6.9543	3.54313e-12	1.53037e-10
AravalEVm011645t1	39.634	22.4395	3.22687	6.95394	3.55223e-12	1.53342e-10
AravalEVm000229t2	39.6136	22.4392	3.22687	6.95386	3.55433e-12	1.53345e-10
AravalEVm033155t1	39.5969	22.4376	3.22687	6.95336	3.5668e-12	1.53763e-10
AravalEVm011088t3	39.5623	22.4372	3.22687	6.95323	3.57018e-12	1.53763e-10
AravalEVm007193t2	41.9281	22.4368	3.22682	6.95324	3.56995e-12	1.53763e-10
AravalEVm010119t1	39.5671	22.4366	3.22687	6.95304	3.57494e-12	1.5388e-10
AravalEVm022846t1	39.5344	22.4362	3.22687	6.95293	3.57782e-12	1.53916e-10
AravalEVm052940t1	39.6424	22.435	3.22687	6.95256	3.58725e-12	1.54233e-10
AravalEVm026863t1	39.4653	22.4345	3.22688	6.95239	3.59161e-12	1.54332e-10
AravalEVm041317t1	39.4248	22.4318	3.22688	6.95155	3.61304e-12	1.55092e-10
AravalEVm029161t1	39.5096	22.4317	3.22687	6.95152	3.61384e-12	1.55092e-10
AravalEVm019047t1	39.4716	22.4315	3.22688	6.95145	3.61549e-12	1.55092e-10
AravalEVm033302t1	39.3599	22.4306	3.22688	6.95118	3.62253e-12	1.55306e-10
AravalEVm060730t1	39.3644	22.4287	3.22688	6.95058	3.6379e-12	1.55875e-10
AravalEVm020723t1	39.9661	22.4269	3.22686	6.95005	3.65144e-12	1.56367e-10
AravalEVm001257t1	39.3121	22.4243	3.22688	6.94923	3.67275e-12	1.5708e-10
AravalEVm005374t1	39.1946	22.4243	3.22688	6.94921	3.67339e-12	1.5708e-10
AravalEVm015817t1	39.2815	22.4241	3.22688	6.94917	3.67438e-12	1.5708e-10
AravalEVm059458t1	39.209	22.4231	3.22688	6.94885	3.68269e-12	1.57346e-10
AravalEVm013742t1	39.1816	22.4225	3.22688	6.94866	3.68783e-12	1.57476e-10
AravalEVm021107t1	39.0749	22.4205	3.22689	6.94802	3.70437e-12	1.58092e-10
AravalEVm015503t1	39.1996	22.4201	3.22688	6.94791	3.70745e-12	1.58092e-10
AravalEVm010326t1	39.1055	22.42	3.22688	6.94786	3.70857e-12	1.58092e-10
AravalEVm071909t1	39.1167	22.4196	3.22688	6.94774	3.71183e-12	1.58141e-10
AravalEVm005610t3	39.0004	22.4177	3.22689	6.94716	3.72722e-12	1.58685e-10
AravalEVm011723t1	38.986	22.417	3.22689	6.94694	3.73299e-12	1.58685e-10
AravalEVm006799t1	39.6787	22.4168	3.22687	6.94692	3.73338e-12	1.58685e-10
AravalEVm009919t2	38.985	22.4168	3.22689	6.94688	3.7346e-12	1.58685e-10
AravalEVm018177t2	39.0311	22.4148	3.22689	6.94626	3.75095e-12	1.59266e-10
AravalEVm060381t1	38.8967	22.414	3.22689	6.94601	3.75753e-12	1.59385e-10
AravalEVm033906t1	38.9621	22.414	3.22689	6.946	3.758e-12	1.59385e-10
AravalEVm007146t3	38.8778	22.4133	3.22689	6.9458	3.7632e-12	1.59515e-10
AravalEVm067326t3	91.6211	22.4129	3.22633	6.94686	3.73515e-12	1.58685e-10
AravalEVm013391t1	38.8499	22.4123	3.22689	6.94546	3.77221e-12	1.59807e-10
AravalEVm021760t1	38.8243	22.4113	3.22689	6.94516	3.78042e-12	1.60034e-10
AravalEVm012841t1	38.8063	22.4107	3.22689	6.94498	3.78502e-12	1.60079e-10
AravalEVm026290t1	38.9084	22.4104	3.22689	6.94488	3.7879e-12	1.60111e-10
AravalEVm004264t2	38.791	22.4099	3.22689	6.94473	3.79192e-12	1.60191e-10
AravalEVm002136t1	38.8216	22.4087	3.22689	6.94435	3.80209e-12	1.6053e-10
AravalEVm023921t1	39.395	22.4081	3.22688	6.9442	3.80602e-12	1.60605e-10
AravalEVm007697t1	38.7109	22.4051	3.22689	6.94325	3.8318e-12	1.61602e-10
AravalEVm008660t1	38.704	22.4037	3.22689	6.9428	3.84408e-12	1.62027e-10
AravalEVm015475t1	38.6142	22.4034	3.2269	6.94272	3.84618e-12	1.62027e-10
AravalEVm020125t1	38.5898	22.4022	3.2269	6.94234	3.85652e-12	1.62254e-10
AravalEVm044287t1	38.5898	22.4022	3.2269	6.94234	3.85652e-12	1.62254e-10
AravalEVm071181t1	38.8082	22.402	3.22689	6.94229	3.85804e-12	1.62254e-10
AravalEVm079109t1	38.5699	22.4011	3.2269	6.942	3.86594e-12	1.62495e-10
AravalEVm012083t1	38.5319	22.4002	3.2269	6.9417	3.87406e-12	1.62745e-10
AravalEVm019911t1	38.4794	22.3974	3.2269	6.94084	3.89783e-12	1.63652e-10
AravalEVm010462t4	38.4103	22.3953	3.2269	6.94019	3.91567e-12	1.64237e-10
AravalEVm020183t1	38.5443	22.3952	3.2269	6.94018	3.91614e-12	1.64237e-10
AravalEVm002083t3	38.3516	22.3943	3.2269	6.93989	3.92416e-12	1.64482e-10
AravalEVm040466t3	38.3975	22.392	3.2269	6.93916	3.9445e-12	1.65242e-10
AravalEVm054077t1	38.2556	22.3911	3.22691	6.93887	3.95235e-12	1.65374e-10
AravalEVm013799t1	38.2817	22.3909	3.22691	6.93882	3.95378e-12	1.65374e-10
AravalEVm032380t1	38.3268	22.3909	3.2269	6.93881	3.95426e-12	1.65374e-10
AravalEVm022742t1	38.2619	22.3893	3.22691	6.93833	3.96753e-12	1.65721e-10
AravalEVm008532t1	38.2033	22.3889	3.22691	6.93819	3.97142e-12	1.65721e-10
AravalEVm041304t1	38.2743	22.3889	3.22691	6.93818	3.97174e-12	1.65721e-10
AravalEVm020224t1	38.2482	22.3888	3.22691	6.93817	3.97202e-12	1.65721e-10
AravalEVm029554t1	38.235	22.3887	3.22691	6.93812	3.97358e-12	1.65721e-10
AravalEVm007517t2	38.1829	22.3877	3.22691	6.9378	3.98241e-12	1.65997e-10
AravalEVm018746t1	38.4765	22.3868	3.2269	6.93755	3.98948e-12	1.662e-10
AravalEVm055547t1	38.1246	22.3855	3.22691	6.93713	4.00145e-12	1.66606e-10
AravalEVm029551t1	38.1622	22.3842	3.22691	6.93672	4.01305e-12	1.66994e-10
AravalEVm023707t1	38.0659	22.3839	3.22691	6.93664	4.01522e-12	1.66994e-10
AravalEVm010470t4	38.1713	22.3825	3.22691	6.93622	4.02744e-12	1.67386e-10
AravalEVm015296t1	38.0555	22.3824	3.22691	6.93616	4.02911e-12	1.67386e-10
AravalEVm067934t1	38.0828	22.3819	3.22691	6.93603	4.03285e-12	1.67416e-10
AravalEVm025937t1	38.0005	22.3818	3.22691	6.93598	4.03429e-12	1.67416e-10
AravalEVm018189t1	38.0038	22.3805	3.22691	6.93558	4.04549e-12	1.67777e-10
AravalEVm031044t1	37.9868	22.3803	3.22691	6.93551	4.04746e-12	1.67777e-10
AravalEVm001890t5	38.0244	22.3793	3.22691	6.93519	4.05675e-12	1.6807e-10
AravalEVm016741t1	37.8677	22.3768	3.22692	6.93444	4.07844e-12	1.68875e-10
AravalEVm009444t1	39.8077	22.3737	3.22687	6.93357	4.10362e-12	1.69824e-10
AravalEVm016328t2	37.8301	22.3734	3.22692	6.93336	4.10963e-12	1.69838e-10
AravalEVm015685t1	37.8566	22.3733	3.22692	6.93334	4.11022e-12	1.69838e-10
AravalEVm018006t1	37.8384	22.3733	3.22692	6.93332	4.11074e-12	1.69838e-10
AravalEVm013748t1	37.7168	22.3714	3.22692	6.93275	4.1273e-12	1.70335e-10
AravalEVm052944t1	37.723	22.3706	3.22692	6.9325	4.13479e-12	1.7055e-10
AravalEVm021066t1	37.8128	22.3703	3.22692	6.93241	4.13734e-12	1.70562e-10
AravalEVm016267t1	37.685	22.3699	3.22692	6.93226	4.1416e-12	1.70644e-10
AravalEVm002706t3	37.6564	22.3673	3.22692	6.93145	4.16537e-12	1.71358e-10
AravalEVm013804t1	37.6089	22.3672	3.22692	6.93142	4.1663e-12	1.71358e-10
AravalEVm079061t1	38.4046	22.3671	3.2269	6.93146	4.16528e-12	1.71358e-10
AravalEVm008314t1	37.7333	22.3669	3.22692	6.93135	4.16841e-12	1.71358e-10
AravalEVm011831t1	37.6047	22.3667	3.22692	6.93127	4.17087e-12	1.71358e-10
AravalEVm043168t1	37.5902	22.3665	3.22692	6.9312	4.17284e-12	1.71358e-10
AravalEVm006451t1	37.5954	22.366	3.22692	6.93107	4.17667e-12	1.71358e-10
AravalEVm002699t1	37.7486	22.366	3.22692	6.93105	4.17718e-12	1.71358e-10
AravalEVm041524t1	37.5584	22.3618	3.22692	6.92975	4.21575e-12	1.72846e-10
AravalEVm008643t1	37.5117	22.3599	3.22693	6.92917	4.23306e-12	1.73461e-10
AravalEVm039619t1	37.3657	22.3566	3.22693	6.92813	4.26441e-12	1.7459e-10
AravalEVm021370t1	37.6105	22.3564	3.22692	6.9281	4.2654e-12	1.7459e-10
AravalEVm034292t1	37.3595	22.3562	3.22693	6.92802	4.2676e-12	1.7459e-10
AravalEVm040249t1	37.3264	22.3551	3.22693	6.92767	4.27833e-12	1.74934e-10
AravalEVm042636t1	37.3426	22.3533	3.22693	6.92711	4.29525e-12	1.7553e-10
AravalEVm021018t2	37.2581	22.3517	3.22693	6.92662	4.31005e-12	1.7604e-10
AravalEVm022593t1	37.173	22.3503	3.22693	6.92619	4.32339e-12	1.76488e-10
AravalEVm040236t2	37.212	22.3484	3.22693	6.92557	4.34227e-12	1.77067e-10
AravalEVm039636t1	37.2292	22.3479	3.22693	6.92543	4.34658e-12	1.77146e-10
AravalEVm004269t1	37.1099	22.3476	3.22694	6.92532	4.34982e-12	1.77182e-10
AravalEVm032967t1	37.1966	22.3463	3.22693	6.92492	4.36227e-12	1.77593e-10
AravalEVm056782t2	55.8609	22.346	3.22659	6.92558	4.34208e-12	1.77067e-10
AravalEVm080665t1	37.0258	22.3452	3.22694	6.92457	4.37288e-12	1.77929e-10
AravalEVm017864t1	37.0733	22.3446	3.22694	6.9244	4.37835e-12	1.78055e-10
AravalEVm010681t1	36.9935	22.3443	3.22694	6.9243	4.38134e-12	1.7808e-10
AravalEVm021295t1	36.9771	22.3413	3.22694	6.92338	4.41007e-12	1.7915e-10
AravalEVm019438t1	36.9029	22.3405	3.22694	6.92311	4.41838e-12	1.79363e-10
AravalEVm034726t1	36.9927	22.3403	3.22694	6.92305	4.42009e-12	1.79363e-10
AravalEVm043369t1	37.5733	22.3394	3.22692	6.9228	4.42797e-12	1.79586e-10
AravalEVm028732t1	36.8008	22.3368	3.22695	6.92196	4.4544e-12	1.80478e-10
AravalEVm029137t1	36.9405	22.3367	3.22694	6.92195	4.45476e-12	1.80478e-10
AravalEVm014820t1	36.8425	22.3356	3.22694	6.9216	4.46581e-12	1.80808e-10
AravalEVm014346t1	36.7676	22.3354	3.22695	6.92154	4.46772e-12	1.80808e-10
AravalEVm005030t2	36.8392	22.3343	3.22694	6.92118	4.47901e-12	1.81167e-10
AravalEVm013928t1	36.7098	22.3333	3.22695	6.92086	4.4891e-12	1.81445e-10
AravalEVm031056t1	36.7112	22.3331	3.22695	6.92081	4.49071e-12	1.81445e-10
AravalEVm015218t3	36.7267	22.3305	3.22695	6.92	4.51652e-12	1.8239e-10
AravalEVm017620t1	36.6279	22.3298	3.22695	6.91977	4.52364e-12	1.82546e-10
AravalEVm015969t1	36.6018	22.3296	3.22695	6.91972	4.52524e-12	1.82546e-10
AravalEVm047910t1	36.661	22.3281	3.22695	6.91925	4.54056e-12	1.83065e-10
AravalEVm069221t1	36.5638	22.3278	3.22695	6.91915	4.54372e-12	1.83094e-10
AravalEVm042825t1	36.608	22.3271	3.22695	6.91895	4.55004e-12	1.83251e-10
AravalEVm019972t1	36.5456	22.3265	3.22695	6.91875	4.55651e-12	1.83413e-10
AravalEVm010194t4	36.5735	22.326	3.22695	6.9186	4.56139e-12	1.83511e-10
AravalEVm023405t1	36.4596	22.3232	3.22695	6.91774	4.589e-12	1.84523e-10
AravalEVm030785t1	36.5621	22.3218	3.22695	6.9173	4.6034e-12	1.85003e-10
AravalEVm028335t1	36.5119	22.3208	3.22695	6.91699	4.61336e-12	1.85304e-10
AravalEVm013804t2	36.3	22.3176	3.22696	6.916	4.64586e-12	1.8651e-10
AravalEVm018957t1	36.3588	22.3163	3.22696	6.91559	4.65917e-12	1.86844e-10
AravalEVm024628t1	36.2139	22.3142	3.22696	6.91494	4.68061e-12	1.87604e-10
AravalEVm022954t1	36.2214	22.313	3.22696	6.91455	4.69339e-12	1.87925e-10
AravalEVm014183t1	36.1672	22.313	3.22696	6.91455	4.69363e-12	1.87925e-10
AravalEVm001739t6	85.3532	22.3127	3.22636	6.91575	4.65381e-12	1.86729e-10
AravalEVm008916t8	36.2102	22.3114	3.22696	6.91406	4.70969e-12	1.88468e-10
AravalEVm024921t1	36.1684	22.3109	3.22696	6.9139	4.71503e-12	1.88581e-10
AravalEVm032504t1	36.1746	22.3106	3.22696	6.91382	4.71764e-12	1.88585e-10
AravalEVm038622t1	36.0856	22.3094	3.22697	6.91342	4.73105e-12	1.89021e-10
AravalEVm002489t1	36.1186	22.3091	3.22696	6.91334	4.73378e-12	1.89029e-10
AravalEVm003616t1	36.1953	22.3086	3.22696	6.91319	4.73871e-12	1.89125e-10
AravalEVm021451t1	36.0472	22.308	3.22697	6.91299	4.74556e-12	1.89298e-10
AravalEVm022766t1	36.0369	22.3074	3.22697	6.91281	4.7514e-12	1.89431e-10
AravalEVm037838t1	36.0667	22.3066	3.22697	6.91255	4.76007e-12	1.89676e-10
AravalEVm028151t1	36.1055	22.3053	3.22697	6.91217	4.77311e-12	1.89975e-10
AravalEVm016104t1	35.9683	22.3051	3.22697	6.9121	4.77516e-12	1.89975e-10
AravalEVm016957t1	54.5826	22.3039	3.22661	6.91247	4.76282e-12	1.89685e-10
AravalEVm010657t1	35.9777	22.3036	3.22697	6.91162	4.79134e-12	1.90215e-10
AravalEVm019134t1	35.9777	22.3036	3.22697	6.91162	4.79134e-12	1.90215e-10
AravalEVm022067t1	35.9195	22.3031	3.22697	6.91146	4.79704e-12	1.9024e-10
AravalEVm010945t1	35.9364	22.303	3.22697	6.91144	4.79742e-12	1.9024e-10
AravalEVm044106t1	35.9794	22.3027	3.22697	6.91136	4.80024e-12	1.9024e-10
AravalEVm007673t2	35.9038	22.3025	3.22697	6.91127	4.80348e-12	1.9024e-10
AravalEVm035166t1	35.9857	22.3023	3.22697	6.91123	4.80463e-12	1.9024e-10
AravalEVm018949t1	35.9397	22.3019	3.22697	6.9111	4.80899e-12	1.90312e-10
AravalEVm020070t1	54.7253	22.3016	3.22661	6.91179	4.78579e-12	1.90196e-10
AravalEVm026612t1	35.9302	22.3015	3.22697	6.91098	4.81326e-12	1.90381e-10
AravalEVm016515t1	35.8735	22.3005	3.22697	6.91067	4.82361e-12	1.9059e-10
AravalEVm007199t2	35.8683	22.2988	3.22697	6.91013	4.84212e-12	1.91147e-10
AravalEVm011885t1	54.5694	22.2986	3.22661	6.91084	4.81798e-12	1.90467e-10
AravalEVm024039t1	35.9402	22.2985	3.22697	6.91005	4.84489e-12	1.91147e-10
AravalEVm076588t1	35.8566	22.2984	3.22697	6.91	4.84658e-12	1.91147e-10
AravalEVm027789t1	35.9071	22.2982	3.22697	6.90996	4.84789e-12	1.91147e-10
AravalEVm014465t2	35.8703	22.296	3.22697	6.90926	4.87198e-12	1.91996e-10
AravalEVm018687t1	35.7251	22.2954	3.22698	6.90906	4.87883e-12	1.92165e-10
AravalEVm032333t1	35.7304	22.2945	3.22698	6.90879	4.88812e-12	1.9219e-10
AravalEVm019434t1	35.7689	22.2944	3.22698	6.90876	4.88892e-12	1.9219e-10
AravalEVm019797t1	35.7045	22.2944	3.22698	6.90874	4.8897e-12	1.9219e-10
AravalEVm026261t1	35.6758	22.2934	3.22698	6.90845	4.89965e-12	1.92481e-10
AravalEVm032787t1	35.7218	22.2927	3.22698	6.90824	4.90694e-12	1.92553e-10
AravalEVm007507t1	54.3374	22.2926	3.22661	6.90897	4.88171e-12	1.92178e-10
AravalEVm010386t1	35.6895	22.2925	3.22698	6.90818	4.90928e-12	1.92553e-10
AravalEVm054829t1	35.79	22.2924	3.22697	6.90813	4.91071e-12	1.92553e-10
AravalEVm076507t1	35.6726	22.2923	3.22698	6.9081	4.91175e-12	1.92553e-10
AravalEVm006358t1	35.6184	22.2917	3.22698	6.9079	4.91876e-12	1.92727e-10
AravalEVm015910t1	35.6672	22.2899	3.22698	6.90736	4.93762e-12	1.93246e-10
AravalEVm001695t1	35.6589	22.2895	3.22698	6.90722	4.9423e-12	1.93246e-10
AravalEVm015934t3	35.6589	22.2895	3.22698	6.90722	4.9423e-12	1.93246e-10
AravalEVm014495t1	35.6535	22.2891	3.22698	6.90711	4.94633e-12	1.93303e-10
AravalEVm043141t2	35.5779	22.2887	3.22698	6.90698	4.95075e-12	1.93359e-10
AravalEVm021597t1	35.5522	22.2883	3.22698	6.90687	4.95471e-12	1.93359e-10
AravalEVm029790t1	35.5928	22.2883	3.22698	6.90685	4.95549e-12	1.93359e-10
AravalEVm004482t1	90.0973	22.2866	3.22634	6.90771	4.92526e-12	1.92881e-10
AravalEVm050596t2	35.5975	22.2858	3.22698	6.90609	4.98212e-12	1.94196e-10
AravalEVm019708t1	35.4612	22.2856	3.22698	6.906	4.98509e-12	1.94212e-10
AravalEVm032241t1	36.718	22.285	3.22695	6.90592	4.98786e-12	1.94219e-10
AravalEVm028436t1	35.4438	22.2842	3.22698	6.90556	5.0004e-12	1.94606e-10
AravalEVm036535t1	35.4013	22.2832	3.22699	6.90528	5.01052e-12	1.94684e-10
AravalEVm067996t1	35.4095	22.2831	3.22699	6.90523	5.01207e-12	1.94684e-10
AravalEVm046754t1	35.457	22.283	3.22698	6.90522	5.01266e-12	1.94684e-10
AravalEVm020657t1	35.4819	22.283	3.22698	6.90521	5.01278e-12	1.94684e-10
AravalEVm037408t2	35.4647	22.2812	3.22698	6.90466	5.03239e-12	1.95244e-10
AravalEVm054464t1	35.4145	22.2794	3.22699	6.90408	5.05302e-12	1.95728e-10
AravalEVm021471t1	35.3004	22.2792	3.22699	6.90403	5.05481e-12	1.95728e-10
AravalEVm005976t1	35.4257	22.2788	3.22698	6.90389	5.0597e-12	1.95798e-10
AravalEVm053277t1	70.7557	22.2781	3.22645	6.90483	5.02653e-12	1.95118e-10
AravalEVm033727t1	35.2698	22.2776	3.22699	6.90352	5.07307e-12	1.96215e-10
AravalEVm043319t1	35.2549	22.2764	3.22699	6.90314	5.08641e-12	1.9657e-10
AravalEVm017606t1	35.2342	22.2763	3.22699	6.90311	5.08751e-12	1.9657e-10
AravalEVm003851t1	83.7182	22.2761	3.22637	6.90438	5.04217e-12	1.95523e-10
AravalEVm071271t1	35.2168	22.2759	3.22699	6.90301	5.09129e-12	1.96615e-10
AravalEVm028341t3	35.2175	22.2757	3.22699	6.90293	5.09415e-12	1.96625e-10
AravalEVm034462t1	71.9718	22.2754	3.22644	6.90402	5.05529e-12	1.95728e-10
AravalEVm026954t1	35.2094	22.2752	3.22699	6.90277	5.09987e-12	1.96744e-10
AravalEVm009089t4	35.2705	22.2748	3.22699	6.90264	5.10438e-12	1.96817e-10
AravalEVm022628t2	35.1529	22.272	3.22699	6.90177	5.13593e-12	1.97727e-10
AravalEVm002033t2	35.1171	22.2716	3.22699	6.90165	5.14027e-12	1.97727e-10
AravalEVm015192t1	35.2317	22.2715	3.22699	6.90163	5.1411e-12	1.97727e-10
AravalEVm026770t1	74.0419	22.2701	3.22643	6.90241	5.11273e-12	1.97038e-10
AravalEVm025799t1	35.0654	22.2693	3.227	6.90095	5.16567e-12	1.98569e-10
AravalEVm048226t2	35.0864	22.269	3.227	6.90085	5.16927e-12	1.98606e-10
AravalEVm034221t1	35.0241	22.2685	3.227	6.90068	5.17551e-12	1.98744e-10
AravalEVm019899t1	35.0923	22.2674	3.227	6.90036	5.18705e-12	1.99085e-10
AravalEVm069880t1	35.0415	22.2672	3.227	6.90027	5.19032e-12	1.99109e-10
AravalEVm017196t1	34.96	22.2651	3.227	6.89962	5.21405e-12	1.99815e-10
AravalEVm013635t1	34.9575	22.2643	3.227	6.89937	5.22319e-12	1.99961e-10
AravalEVm040050t3	53.1981	22.2631	3.22663	6.89981	5.20735e-12	1.9966e-10
AravalEVm018182t7	35.0858	22.2625	3.227	6.89884	5.24281e-12	2.00556e-10
AravalEVm002463t1	34.9128	22.2625	3.227	6.89881	5.24407e-12	2.00556e-10
AravalEVm019340t1	37.8053	22.2607	3.22692	6.89845	5.25734e-12	2.00961e-10
AravalEVm009727t3	34.8158	22.258	3.227	6.89741	5.29585e-12	2.0233e-10
AravalEVm046262t1	34.7516	22.2564	3.22701	6.89691	5.31451e-12	2.02897e-10
AravalEVm032367t1	34.8277	22.2562	3.227	6.89687	5.31607e-12	2.02897e-10
AravalEVm073512t1	34.7242	22.256	3.22701	6.89678	5.31935e-12	2.02919e-10
AravalEVm050303t2	34.7628	22.2557	3.22701	6.8967	5.32238e-12	2.02931e-10
AravalEVm020765t2	34.8411	22.2553	3.227	6.89658	5.32681e-12	2.02986e-10
AravalEVm023281t1	34.6999	22.2551	3.22701	6.89652	5.32922e-12	2.02986e-10
AravalEVm022507t1	34.7553	22.2546	3.22701	6.89637	5.33469e-12	2.03091e-10
AravalEVm036835t1	34.7143	22.252	3.22701	6.89556	5.36516e-12	2.04148e-10
AravalEVm005006t1	34.6171	22.2514	3.22701	6.89538	5.37226e-12	2.04315e-10
AravalEVm026035t1	34.6874	22.2509	3.22701	6.8952	5.37903e-12	2.04426e-10
AravalEVm070506t1	37.5592	22.2501	3.22692	6.89515	5.38063e-12	2.04426e-10
AravalEVm019155t1	34.5857	22.2492	3.22701	6.89469	5.39821e-12	2.0499e-10
AravalEVm016778t1	34.6399	22.2474	3.22701	6.89413	5.41948e-12	2.05694e-10
AravalEVm067986t1	34.4922	22.2469	3.22701	6.89394	5.42666e-12	2.05772e-10
AravalEVm020534t1	34.63	22.2461	3.22701	6.89373	5.43481e-12	2.05963e-10
AravalEVm052970t1	34.6879	22.2457	3.22701	6.89361	5.43931e-12	2.0603e-10
AravalEVm038223t1	34.4087	22.2434	3.22702	6.89287	5.46773e-12	2.07002e-10
AravalEVm010331t1	74.7053	22.2428	3.22642	6.89393	5.42702e-12	2.05772e-10
AravalEVm034433t1	34.4005	22.2423	3.22702	6.89251	5.48149e-12	2.07282e-10
AravalEVm024902t1	34.4092	22.2421	3.22702	6.89246	5.48342e-12	2.07282e-10
AravalEVm047963t1	34.3967	22.2413	3.22702	6.89221	5.49333e-12	2.07553e-10
AravalEVm014500t1	34.4207	22.2408	3.22702	6.89206	5.49892e-12	2.0766e-10
AravalEVm056685t1	34.3231	22.2398	3.22702	6.89176	5.51081e-12	2.07902e-10
AravalEVm046586t2	34.3149	22.2394	3.22702	6.89163	5.51552e-12	2.07902e-10
AravalEVm021089t1	34.3057	22.2394	3.22702	6.89162	5.51599e-12	2.07902e-10
AravalEVm006050t2	34.2894	22.2391	3.22702	6.89154	5.51925e-12	2.07902e-10
AravalEVm047979t1	34.3182	22.239	3.22702	6.89151	5.5202e-12	2.07902e-10
AravalEVm040286t1	85.2468	22.2385	3.22636	6.89274	5.47294e-12	2.07095e-10
AravalEVm009521t1	34.2665	22.2372	3.22702	6.89094	5.54246e-12	2.0857e-10
AravalEVm029263t1	34.2478	22.2369	3.22702	6.89085	5.5459e-12	2.08595e-10
AravalEVm013232t2	34.3252	22.2348	3.22702	6.8902	5.57139e-12	2.09303e-10
AravalEVm016099t1	34.2359	22.2346	3.22702	6.89014	5.57384e-12	2.09303e-10
AravalEVm002962t1	34.2077	22.2342	3.22702	6.89001	5.57865e-12	2.09303e-10
AravalEVm005911t1	34.2598	22.2342	3.22702	6.89002	5.57855e-12	2.09303e-10
AravalEVm023622t1	34.1647	22.2324	3.22702	6.88945	5.60103e-12	2.10037e-10
AravalEVm026737t2	34.1618	22.2322	3.22702	6.88937	5.60406e-12	2.10046e-10
AravalEVm047949t1	34.1101	22.2308	3.22703	6.88894	5.62107e-12	2.10446e-10
AravalEVm007092t1	34.1217	22.2305	3.22703	6.88885	5.62444e-12	2.10446e-10
AravalEVm085831t1	34.1039	22.2301	3.22703	6.88873	5.62921e-12	2.10446e-10
AravalEVm013966t2	34.1465	22.2301	3.22703	6.88873	5.62921e-12	2.10446e-10
AravalEVm019250t1	34.07	22.2297	3.22703	6.8886	5.63434e-12	2.10446e-10
AravalEVm017272t2	39.6931	22.2291	3.22687	6.88875	5.62866e-12	2.10446e-10
AravalEVm011722t1	34.0477	22.2268	3.22703	6.88771	5.66978e-12	2.11395e-10
AravalEVm025814t1	34.08	22.2267	3.22703	6.88768	5.67101e-12	2.11395e-10
AravalEVm006105t3	70.5105	22.2259	3.22645	6.88865	5.63226e-12	2.10446e-10
AravalEVm016041t2	34.034	22.2257	3.22703	6.88735	5.68424e-12	2.11783e-10
AravalEVm036420t1	33.9654	22.2253	3.22703	6.88724	5.68869e-12	2.11844e-10
AravalEVm015602t1	34.0688	22.2249	3.22703	6.88712	5.69349e-12	2.11917e-10
AravalEVm021608t1	74.3616	22.2244	3.22643	6.88825	5.64846e-12	2.10764e-10
AravalEVm020662t1	33.9265	22.2237	3.22703	6.88674	5.70837e-12	2.12292e-10
AravalEVm046024t3	33.9523	22.2235	3.22703	6.88668	5.7108e-12	2.12292e-10
AravalEVm013065t1	34.0464	22.2231	3.22703	6.88656	5.71557e-12	2.12319e-10
AravalEVm006807t4	38.2288	22.2226	3.22691	6.88665	5.71204e-12	2.12292e-10
AravalEVm022408t1	34.0076	22.2218	3.22703	6.88614	5.73273e-12	2.12851e-10
AravalEVm054465t1	33.8756	22.2213	3.22703	6.88598	5.73923e-12	2.12987e-10
AravalEVm023602t1	37.5261	22.2201	3.22693	6.88583	5.74508e-12	2.12993e-10
AravalEVm025141t1	33.8612	22.2199	3.22703	6.88555	5.75641e-12	2.13308e-10
AravalEVm000992t1	33.8065	22.2193	3.22704	6.88535	5.76466e-12	2.13479e-10
AravalEVm019069t1	34.6457	22.2189	3.22701	6.8853	5.76673e-12	2.13479e-10
AravalEVm066677t1	33.9112	22.2189	3.22703	6.88523	5.76956e-12	2.13479e-10
AravalEVm007389t5	33.7582	22.2168	3.22704	6.88459	5.79545e-12	2.14292e-10
AravalEVm021088t1	33.8368	22.2164	3.22704	6.88448	5.80009e-12	2.14292e-10
AravalEVm035409t1	33.8368	22.2164	3.22704	6.88448	5.80009e-12	2.14292e-10
AravalEVm023868t1	33.8425	22.216	3.22704	6.88435	5.80525e-12	2.14377e-10
AravalEVm019712t1	33.6858	22.2141	3.22704	6.88375	5.82974e-12	2.15176e-10
AravalEVm012144t1	33.7301	22.2135	3.22704	6.88356	5.83751e-12	2.15357e-10
AravalEVm031340t1	33.6834	22.2128	3.22704	6.88334	5.84651e-12	2.15583e-10
AravalEVm000240t2	33.6866	22.2114	3.22704	6.8829	5.86463e-12	2.16039e-10
AravalEVm003561t1	35.6572	22.2111	3.22698	6.88295	5.86237e-12	2.16039e-10
AravalEVm037190t1	33.5986	22.2104	3.22704	6.88259	5.87721e-12	2.16397e-10
AravalEVm037038t1	33.5406	22.2075	3.22705	6.88169	5.91468e-12	2.17669e-10
AravalEVm016167t1	33.4832	22.2055	3.22705	6.88106	5.94068e-12	2.18519e-10
AravalEVm013819t1	34.7635	22.2045	3.22701	6.88085	5.9497e-12	2.18744e-10
AravalEVm025164t1	33.5076	22.2044	3.22705	6.88073	5.95465e-12	2.18819e-10
AravalEVm014739t1	33.5568	22.2041	3.22704	6.88064	5.95836e-12	2.18848e-10
AravalEVm025073t1	34.8558	22.2018	3.227	6.88001	5.985e-12	2.19719e-10
AravalEVm020783t4	33.3951	22.2015	3.22705	6.8798	5.99371e-12	2.19824e-10
AravalEVm002417t5	33.3903	22.2008	3.22705	6.8796	6.00225e-12	2.19936e-10
AravalEVm020211t4	33.4146	22.2008	3.22705	6.87959	6.00261e-12	2.19936e-10
AravalEVm043105t5	33.3595	22.1995	3.22705	6.8792	6.01912e-12	2.20433e-10
AravalEVm073500t1	50.8296	22.1992	3.22666	6.87991	5.98892e-12	2.19756e-10
AravalEVm008461t3	33.3206	22.1985	3.22705	6.87886	6.03318e-12	2.2084e-10
AravalEVm031464t1	33.3024	22.1972	3.22705	6.87846	6.05035e-12	2.21205e-10
AravalEVm004267t1	33.3268	22.1971	3.22705	6.87845	6.05057e-12	2.21205e-10
AravalEVm016628t1	33.283	22.197	3.22705	6.87842	6.05199e-12	2.21205e-10
AravalEVm087918t1	33.2888	22.1963	3.22705	6.87818	6.06205e-12	2.21348e-10
AravalEVm019521t1	33.2942	22.1962	3.22705	6.87817	6.06273e-12	2.21348e-10
AravalEVm013128t1	33.3235	22.1961	3.22705	6.87812	6.06473e-12	2.21348e-10
AravalEVm016244t1	33.2487	22.1953	3.22705	6.87789	6.07451e-12	2.21597e-10
AravalEVm020436t1	33.2338	22.1949	3.22706	6.87775	6.08054e-12	2.21602e-10
AravalEVm034106t1	33.2321	22.1947	3.22706	6.87768	6.08359e-12	2.21606e-10
AravalEVm024840t1	33.2015	22.1924	3.22706	6.87699	6.11298e-12	2.2246e-10
AravalEVm031384t1	33.1801	22.192	3.22706	6.87686	6.11866e-12	2.22559e-10
AravalEVm070616t1	33.278	22.1916	3.22705	6.87673	6.12403e-12	2.22647e-10
AravalEVm015551t2	33.191	22.1906	3.22706	6.87643	6.13702e-12	2.23011e-10
AravalEVm091283t1	81.3822	22.1881	3.22638	6.87708	6.10935e-12	2.22436e-10
AravalEVm028922t1	33.0749	22.1879	3.22706	6.87559	6.17351e-12	2.24229e-10
AravalEVm016937t1	33.0142	22.1858	3.22706	6.87493	6.20192e-12	2.25106e-10
AravalEVm082502t1	33.0361	22.1857	3.22706	6.87489	6.20366e-12	2.25106e-10
AravalEVm047131t1	33.0088	22.1844	3.22706	6.87449	6.22137e-12	2.25552e-10
AravalEVm045554t1	33.0377	22.1844	3.22706	6.87447	6.22195e-12	2.25552e-10
AravalEVm031161t1	32.97	22.184	3.22706	6.87437	6.22638e-12	2.25603e-10
AravalEVm046554t1	32.9645	22.1834	3.22706	6.87418	6.23469e-12	2.25795e-10
AravalEVm024576t1	32.917	22.1814	3.22707	6.87354	6.26299e-12	2.26711e-10
AravalEVm014821t1	32.9151	22.1802	3.22707	6.87316	6.27939e-12	2.27195e-10
AravalEVm009169t1	32.8653	22.1786	3.22707	6.87266	6.30139e-12	2.27881e-10
AravalEVm021871t1	32.864	22.1778	3.22707	6.87244	6.31113e-12	2.28124e-10
AravalEVm003715t1	32.8436	22.1774	3.22707	6.87232	6.31682e-12	2.28133e-10
AravalEVm026517t1	34.6039	22.177	3.22701	6.8723	6.31747e-12	2.28133e-10
AravalEVm016561t1	32.8777	22.1763	3.22707	6.87198	6.33186e-12	2.28433e-10
AravalEVm019643t3	32.8486	22.1757	3.22707	6.87179	6.34027e-12	2.28627e-10
AravalEVm046799t1	32.8703	22.1752	3.22707	6.87162	6.34787e-12	2.28706e-10
AravalEVm014285t1	32.7842	22.1751	3.22707	6.8716	6.34853e-12	2.28706e-10
AravalEVm015741t1	32.9737	22.1745	3.22706	6.87142	6.35662e-12	2.28887e-10
AravalEVm063829t1	44.859	22.1744	3.22676	6.87202	6.33007e-12	2.28433e-10
AravalEVm030064t1	32.8123	22.1743	3.22707	6.87133	6.36056e-12	2.28919e-10
AravalEVm028963t1	32.7404	22.1739	3.22707	6.87122	6.36534e-12	2.28981e-10
AravalEVm055242t1	32.8484	22.1733	3.22707	6.87104	6.37376e-12	2.29093e-10
AravalEVm008635t1	32.8628	22.1732	3.22707	6.87102	6.37455e-12	2.29093e-10
AravalEVm017688t1	32.7288	22.1729	3.22707	6.8709	6.38e-12	2.29144e-10
AravalEVm019345t1	32.7036	22.1727	3.22707	6.87085	6.38207e-12	2.29144e-10
AravalEVm023304t1	32.7805	22.1722	3.22707	6.87069	6.38933e-12	2.29296e-10
AravalEVm026603t2	32.7005	22.1719	3.22707	6.8706	6.39324e-12	2.29326e-10
AravalEVm041949t1	32.7631	22.1715	3.22707	6.87046	6.39938e-12	2.29437e-10
AravalEVm001202t3	32.7822	22.1712	3.22707	6.87036	6.40381e-12	2.29486e-10
AravalEVm022613t1	32.6639	22.17	3.22708	6.86999	6.42073e-12	2.29983e-10
AravalEVm009540t1	34.4275	22.1691	3.22702	6.86984	6.42729e-12	2.30108e-10
AravalEVm005345t1	32.6238	22.1686	3.22708	6.86958	6.43932e-12	2.30383e-10
AravalEVm052255t1	32.6999	22.1685	3.22707	6.86954	6.44111e-12	2.30383e-10
AravalEVm058448t1	32.5883	22.1679	3.22708	6.86934	6.44975e-12	2.30465e-10
AravalEVm020360t1	33.3198	22.1675	3.22705	6.86928	6.45259e-12	2.30465e-10
AravalEVm040875t1	32.5965	22.1664	3.22708	6.86887	6.47113e-12	2.31017e-10
AravalEVm020373t1	32.5605	22.1654	3.22708	6.86857	6.48486e-12	2.31287e-10
AravalEVm028646t1	35.0865	22.1652	3.227	6.86867	6.48019e-12	2.3123e-10
AravalEVm040667t1	32.594	22.1649	3.22708	6.86841	6.49207e-12	2.31435e-10
[truncated: 8,397 more rows]

## Sheet: Table S3
	baseMean	log2FoldChange	lfcSE	stat	pvalue	padj
AravsEVm013802t3	355.69	25.9157	3.02628	8.56354	1.09451e-17	1.02686e-13
AravsEVm015650t3	348.315	25.8909	3.02629	8.55536	1.17506e-17	1.02686e-13
AravsEVm016013t1	219.874	25.2495	3.02634	8.34325	7.22766e-17	5.05286e-13
AravsEVm065661t2	216.348	25.1269	3.02635	8.30272	1.01757e-16	6.2183e-13
AravsEVm000067t6	201.893	25.1098	3.02636	8.29704	1.06737e-16	6.2183e-13
AravsEVm001811t4	291.788	24.9158	2.75217	9.05314	1.3891e-19	2.4278e-15
AravsEVm026087t1	149.261	24.6958	3.02642	8.16007	3.34824e-16	1.80058e-12
AravsEVm013802t1	178.893	24.6343	3.02638	8.13985	3.95774e-16	1.97633e-12
AravsEVm017498t6	138.288	24.5933	3.02644	8.12615	4.43156e-16	1.97728e-12
AravsEVm014531t1	136.604	24.5856	3.02644	8.12361	4.5253e-16	1.97728e-12
AravsEVm029696t4	130.15	24.4907	3.02645	8.09221	5.85905e-16	2.40945e-12
AravsEVm001223t2	121.548	24.4106	3.02647	8.06569	7.28211e-16	2.82829e-12
AravsEVm057417t1	116.76	24.3594	3.02648	8.04875	8.36435e-16	2.93381e-12
AravsEVm024554t1	116.252	24.3581	3.02648	8.04833	8.3931e-16	2.93381e-12
AravsEVm069064t1	113.075	24.3221	2.72851	8.91404	4.92063e-19	6.88002e-15
AravsEVm005892t1	108.909	24.2644	3.0265	8.0173	1.08097e-15	3.49366e-12
AravsEVm027872t1	107.196	24.2538	3.02651	8.01379	1.11225e-15	3.49366e-12
AravsEVm011916t7	97.3902	24.1131	3.02654	7.96723	1.62274e-15	4.36329e-12
AravsEVm009321t1	93.4733	24.0505	3.02655	7.94651	1.91839e-15	4.7898e-12
AravsEVm019570t1	93.0028	24.0274	3.02656	7.93886	2.04053e-15	4.91909e-12
AravsEVm018315t1	89.0896	23.9916	3.02657	7.92698	2.24537e-15	5.23246e-12
AravsEVm026893t5	87.0349	23.9572	3.02658	7.91561	2.4604e-15	5.38682e-12
AravsEVm000388t5	99.0308	23.9561	3.02653	7.91534	2.46572e-15	5.38682e-12
AravsEVm006746t3	89.7529	23.9012	3.02657	7.89711	2.85447e-15	6.04715e-12
AravsEVm010069t1	81.4823	23.8637	3.02661	7.88462	3.15494e-15	6.48712e-12
AravsEVm000074t3	78.2153	23.804	3.02663	7.86485	3.69545e-15	7.3814e-12
AravsEVm028715t1	71.722	23.6836	3.02667	7.82499	5.07713e-15	9.59304e-12
AravsEVm005487t3	68.3845	23.6203	3.02669	7.804	5.99747e-15	1.10338e-11
AravsEVm068342t2	65.756	23.5659	3.02671	7.78598	6.9173e-15	1.23997e-11
AravsEVm022294t5	65.2517	23.5502	3.02671	7.78079	7.20705e-15	1.25961e-11
AravsEVm007408t2	63.28	23.5095	3.02673	7.76728	8.01884e-15	1.36731e-11
AravsEVm008984t1	62.7995	23.4978	3.02673	7.76341	8.26726e-15	1.37611e-11
AravsEVm004469t1	61.267	23.4632	3.02675	7.75194	9.05026e-15	1.4714e-11
AravsEVm012129t1	56.1642	23.3445	3.0268	7.7126	1.23275e-14	1.95868e-11
AravsEVm019483t1	54.7528	23.3085	3.02682	7.70068	1.35348e-14	2.10271e-11
AravsEVm025224t1	53.9592	23.2895	3.02682	7.69436	1.42209e-14	2.16127e-11
AravsEVm000011t2	53.4143	23.2712	3.02683	7.68831	1.49089e-14	2.21761e-11
AravsEVm006242t2	52.0031	23.237	3.02685	7.67695	1.62926e-14	2.37294e-11
AravsEVm010213t4	51.1535	23.2156	3.02686	7.66987	1.72165e-14	2.44582e-11
AravsEVm013870t1	51.0415	23.2095	3.02686	7.66783	1.74926e-14	2.44582e-11
AravsEVm015901t2	50.5693	23.1966	3.02687	7.66357	1.8083e-14	2.47879e-11
AravsEVm023296t1	49.8575	23.18	3.02688	7.65806	1.88758e-14	2.53771e-11
AravsEVm002989t2	48.2638	23.1339	3.0269	7.64276	2.12615e-14	2.78899e-11
AravsEVm010986t1	45.5854	23.0559	3.02694	7.6169	2.59837e-14	2.8987e-11
AravsEVm002309t2	45.3866	23.0433	3.02694	7.61271	2.68403e-14	2.8987e-11
AravsEVm004648t6	73.6833	23.0335	3.02665	7.61021	2.73658e-14	2.8987e-11
AravsEVm012224t1	44.7526	23.028	3.02696	7.60765	2.79129e-14	2.91252e-11
AravsEVm001034t5	43.7007	22.9959	3.02697	7.59698	3.03112e-14	3.11626e-11
AravsEVm009669t3	44.8867	22.9704	3.02695	7.58863	3.23297e-14	3.17111e-11
AravsEVm027474t1	42.8153	22.9667	3.02699	7.58732	3.26592e-14	3.17111e-11
AravsEVm001154t1	41.9733	22.94	3.02701	7.57844	3.49747e-14	3.30417e-11
AravsEVm010807t5	41.6345	22.9265	3.02701	7.57398	3.6195e-14	3.33973e-11
AravsEVm016089t1	41.5314	22.9202	3.02701	7.57189	3.67843e-14	3.33973e-11
AravsEVm008835t1	41.0747	22.9106	3.02702	7.56868	3.77034e-14	3.37929e-11
AravsEVm002390t1	40.4712	22.8894	3.02704	7.56164	3.98017e-14	3.48644e-11
AravsEVm002719t1	40.2864	22.8829	3.02704	7.55951	4.04587e-14	3.49194e-11
AravsEVm003165t3	40.1332	22.8774	3.02704	7.55768	4.10319e-14	3.49822e-11
AravsEVm030465t1	40.108	22.8706	3.02704	7.55541	4.17532e-14	3.51682e-11
AravsEVm002194t4	39.6346	22.86	3.02705	7.5519	4.28938e-14	3.56989e-11
AravsEVm013816t3	39.4176	22.8518	3.02706	7.54916	4.3806e-14	3.60291e-11
AravsEVm021015t2	38.3177	22.8132	3.02708	7.53634	4.83328e-14	3.87796e-11
AravsEVm005280t2	38.2051	22.8093	3.02709	7.53505	4.88142e-14	3.87796e-11
AravsEVm020803t3	37.8956	22.7972	3.02341	7.54024	4.69105e-14	3.81339e-11
AravsEVm023505t4	37.5551	22.7826	3.0271	7.5262	5.22382e-14	4.10334e-11
AravsEVm010804t7	36.7927	22.7562	3.02712	7.51743	5.58642e-14	4.32668e-11
AravsEVm060606t1	37.7319	22.7528	3.0271	7.51637	5.63193e-14	4.32668e-11
AravsEVm020112t1	35.5811	22.7034	3.02715	7.4999	6.38658e-14	4.85311e-11
AravsEVm073914t1	37.6209	22.6842	3.0271	7.49371	6.69557e-14	4.97344e-11
AravsEVm011230t3	34.8967	22.681	3.02717	7.49248	6.75836e-14	4.97344e-11
AravsEVm015650t4	34.7184	22.6713	3.02718	7.48924	6.92742e-14	5.04475e-11
AravsEVm011001t2	34.2438	22.6553	3.02719	7.48395	7.21216e-14	5.08002e-11
AravsEVm017533t4	34.107	22.6507	3.0272	7.48239	7.29816e-14	5.08002e-11
AravsEVm011365t3	34.0879	22.6484	3.0272	7.48166	7.33918e-14	5.08002e-11
AravsEVm022158t1	33.4021	22.6219	3.02722	7.47283	7.84869e-14	5.23111e-11
AravsEVm020112t2	33.344	22.6193	3.02722	7.47196	7.90096e-14	5.23111e-11
AravsEVm011249t5	33.2056	22.6134	3.02363	7.47887	7.49621e-14	5.13784e-11
AravsEVm003170t1	33.1303	22.6101	3.02722	7.46891	8.08602e-14	5.23111e-11
AravsEVm018840t1	33.1227	22.6086	3.02723	7.46843	8.11548e-14	5.23111e-11
AravsEVm000833t2	33.5161	22.6086	3.02721	7.46846	8.11395e-14	5.23111e-11
AravsEVm010409t1	33.1455	22.6066	3.02722	7.46778	8.15606e-14	5.23111e-11
AravsEVm019570t2	32.9072	22.6007	3.02723	7.4658	8.2795e-14	5.262e-11
AravsEVm006379t2	32.5353	22.5851	3.02724	7.46062	8.61183e-14	5.41745e-11
AravsEVm018303t3	32.2594	22.573	3.02725	7.45658	8.87946e-14	5.42856e-11
AravsEVm001532t4	32.2739	22.5707	3.02725	7.45584	8.92983e-14	5.42856e-11
AravsEVm008715t3	30.7643	22.5061	3.0273	7.43435	1.05081e-13	6.12427e-11
AravsEVm014536t2	30.6466	22.5002	3.02731	7.4324	1.06642e-13	6.16142e-11
AravsEVm026562t1	30.5303	22.4932	3.02731	7.4301	1.08519e-13	6.18654e-11
AravsEVm000052t5	30.2357	22.4785	3.02732	7.42521	1.12598e-13	6.24738e-11
AravsEVm004953t1	30.1169	22.4732	3.00151	7.4873	7.03047e-14	5.06701e-11
AravsEVm000344t4	29.9306	22.4698	3.02734	7.4223	1.15103e-13	6.3361e-11
AravsEVm008197t2	29.5372	22.4496	3.02735	7.4156	1.21072e-13	6.56134e-11
AravsEVm008982t3	29.4304	22.4448	3.02736	7.41399	1.22556e-13	6.59071e-11
AravsEVm016127t1	29.2603	22.4366	3.02736	7.41129	1.25081e-13	6.62457e-11
AravsEVm022928t1	29.0954	22.4262	3.02737	7.40783	1.28382e-13	6.70692e-11
AravsEVm013747t1	28.982	22.4246	3.0224	7.41945	1.17607e-13	6.42334e-11
AravsEVm007242t2	29.0008	22.4239	3.01978	7.42567	1.12207e-13	6.24738e-11
AravsEVm006621t6	28.7971	22.415	3.02738	7.40409	1.32049e-13	6.70692e-11
AravsEVm007774t1	28.6881	22.4093	3.02739	7.4022	1.33948e-13	6.70692e-11
AravsEVm002813t2	28.7147	22.405	3.02738	7.40079	1.35376e-13	6.70692e-11
AravsEVm016217t1	28.605	22.4027	3.02739	7.40001	1.36172e-13	6.70692e-11
AravsEVm019682t1	30.486	22.402	3.02732	7.39996	1.3623e-13	6.70692e-11
AravsEVm042158t1	28.5311	22.3997	3.0028	7.45959	8.67907e-14	5.41745e-11
AravsEVm059204t1	28.2729	22.3877	3.0274	7.39501	1.41403e-13	6.88512e-11
AravsEVm014918t3	28.3726	22.3865	3.0274	7.39461	1.41819e-13	6.88512e-11
AravsEVm015516t2	28.1198	22.375	3.02741	7.3908	1.45947e-13	6.98848e-11
AravsEVm052448t1	28.0915	22.3655	3.02741	7.38767	1.49419e-13	7.05641e-11
AravsEVm016643t2	27.7513	22.3625	3.02743	7.38663	1.50595e-13	7.05641e-11
AravsEVm048043t1	28.129	22.3602	3.02741	7.38592	1.51404e-13	7.05641e-11
AravsEVm003059t6	27.515	22.3508	3.02744	7.38274	1.55067e-13	7.15271e-11
AravsEVm009944t4	27.4903	22.3496	3.02744	7.38235	1.55516e-13	7.15271e-11
AravsEVm027520t1	27.4552	22.3449	3.00264	7.44176	9.93522e-14	5.93651e-11
AravsEVm020559t5	27.3624	22.3433	3.00079	7.44581	9.63541e-14	5.807e-11
AravsEVm031259t1	27.2449	22.3385	3.00454	7.4349	1.04647e-13	6.12427e-11
AravsEVm004846t3	27.2195	22.336	3.00445	7.4343	1.05123e-13	6.12427e-11
AravsEVm001054t5	27.1832	22.3323	3.02122	7.39183	1.44826e-13	6.9826e-11
AravsEVm007269t5	27.195	22.3322	3.01534	7.40622	1.29949e-13	6.70692e-11
AravsEVm003560t5	27.1525	22.3312	3.02268	7.38786	1.49207e-13	7.05641e-11
AravsEVm020245t3	29.5467	22.3269	3.00531	7.42916	1.0929e-13	6.18654e-11
AravsEVm014940t1	26.8261	22.3115	3.01027	7.41178	1.24615e-13	6.62457e-11
AravsEVm004110t4	26.6027	22.3008	3.02748	7.36612	1.75666e-13	7.82219e-11
AravsEVm010013t1	27.0675	22.2908	3.02746	7.36287	1.79992e-13	7.91399e-11
AravsEVm002184t9	26.1429	22.2745	3.00867	7.40346	1.32684e-13	6.70692e-11
AravsEVm005773t2	38.8971	22.2701	3.02707	7.35699	1.88106e-13	8.21905e-11
AravsEVm014411t1	25.7033	22.2511	2.99532	7.42863	1.09731e-13	6.18654e-11
AravsEVm001373t7	25.0568	22.2201	3.02756	7.33926	2.14777e-13	9.20197e-11
AravsEVm014304t1	25.0629	22.2192	3.01106	7.3792	1.59244e-13	7.22906e-11
AravsEVm000546t2	25.0105	22.2187	3.01048	7.38046	1.57747e-13	7.2079e-11
AravsEVm017178t7	27.1998	22.2147	3.02745	7.33777	2.17183e-13	9.20197e-11
AravsEVm020914t1	24.9582	22.2137	3.02724	7.33794	2.16911e-13	9.20197e-11
AravsEVm023505t1	24.6559	22.1988	3.01404	7.36514	1.76962e-13	7.83001e-11
AravsEVm002826t2	60.883	22.1949	3.02675	7.33293	2.25182e-13	9.48343e-11
AravsEVm029133t1	24.45	22.1873	3.01912	7.34893	1.99796e-13	8.6756e-11
AravsEVm012308t6	24.5211	22.1859	3.02759	7.32793	2.33742e-13	9.78498e-11
AravsEVm007408t4	24.2215	22.1741	3.02761	7.32396	2.40757e-13	9.87947e-11
AravsEVm008323t8	24.1842	22.1698	3.02705	7.32389	2.40884e-13	9.87947e-11
AravsEVm007808t4	23.9321	22.1582	3.02762	7.31869	2.50395e-13	1.01774e-10
AravsEVm007089t1	23.8587	22.1537	3.00579	7.37033	1.70203e-13	7.67668e-11
AravsEVm004837t2	23.6343	22.1401	3.01678	7.33899	2.15214e-13	9.20197e-11
AravsEVm020549t2	23.6828	22.1368	3.02764	7.31158	2.64014e-13	1.06076e-10
AravsEVm013753t1	23.4864	22.1315	3.02765	7.30978	2.6758e-13	1.06196e-10
AravsEVm003269t2	23.5038	22.1295	3.02765	7.30913	2.6887e-13	1.06196e-10
AravsEVm013996t1	23.3416	22.1196	3.02766	7.30585	2.75524e-13	1.08213e-10
AravsEVm006958t2	24.5012	22.1162	2.9879	7.40191	1.34239e-13	6.70692e-11
AravsEVm002241t6	23.1391	22.1046	3.02171	7.31526	2.56887e-13	1.03809e-10
AravsEVm018451t1	22.8931	22.0944	2.99908	7.36708	1.74408e-13	7.81595e-11
AravsEVm013767t5	22.4367	22.0673	3.02772	7.28844	3.13569e-13	1.21114e-10
AravsEVm011740t2	22.3789	22.0624	3.02275	7.2988	2.90353e-13	1.134e-10
AravsEVm001284t2	22.3243	22.0602	3.01762	7.31047	2.66213e-13	1.06196e-10
AravsEVm016955t2	22.3197	22.0586	3.01205	7.32346	2.41652e-13	9.87947e-11
AravsEVm015372t1	21.8805	22.028	3.02776	7.27535	3.45513e-13	1.32719e-10
AravsEVm004288t4	21.7625	22.0223	3.02777	7.27345	3.50415e-13	1.33866e-10
AravsEVm012920t1	21.6343	22.0136	3.02778	7.27054	3.58061e-13	1.35327e-10
AravsEVm014190t4	21.613	22.0135	3.02778	7.27052	3.58111e-13	1.35327e-10
AravsEVm000694t1	21.5361	22.0092	3.02778	7.26907	3.61962e-13	1.36047e-10
AravsEVm003107t1	21.3963	22.001	3.00353	7.32505	2.38805e-13	9.87947e-11
AravsEVm020157t1	21.1458	21.9848	3.0158	7.28988	3.10232e-13	1.20491e-10
AravsEVm006894t5	20.6271	21.9508	3.02785	7.24963	4.17922e-13	1.55409e-10
AravsEVm018603t2	20.6539	21.95	3.02756	7.25005	4.1662e-13	1.55409e-10
AravsEVm001054t3	20.1129	21.9137	3.0279	7.23728	4.57781e-13	1.6933e-10
AravsEVm031189t1	21.2584	21.9075	3.0278	7.23546	4.63965e-13	1.70715e-10
AravsEVm011030t2	55.7763	21.8789	3.0268	7.22839	4.88758e-13	1.77964e-10
AravsEVm029006t3	19.3772	21.8604	3.02796	7.21952	5.21719e-13	1.88981e-10
AravsEVm001512t3	19.1391	21.8458	3.02798	7.21463	5.40822e-13	1.94891e-10
AravsEVm002585t2	18.9976	21.8351	3.028	7.21107	5.55129e-13	1.99021e-10
AravsEVm021935t2	18.8521	21.824	3.02801	7.20738	5.70388e-13	2.03448e-10
AravsEVm027172t1	19.0413	21.7934	3.01289	7.23338	4.71122e-13	1.72441e-10
AravsEVm017846t2	18.0627	21.7652	3.02809	7.18775	6.58691e-13	2.32764e-10
AravsEVm002905t2	18.0589	21.7648	3.02809	7.18763	6.59236e-13	2.32764e-10
AravsEVm059757t1	18.0457	21.7602	3.02809	7.1861	6.6667e-13	2.34205e-10
AravsEVm006891t8	17.8169	21.7471	3.02812	7.18172	6.88396e-13	2.40629e-10
AravsEVm010563t2	45.9277	21.6165	3.02694	7.14139	9.23949e-13	3.2136e-10
AravsEVm001132t1	22.924	21.439	3.02769	7.08097	1.43146e-12	4.95413e-10
AravsEVm014573t1	36.4686	21.3435	3.02713	7.05075	1.77962e-12	6.12873e-10
AravsEVm002390t3	28.8297	21.2618	3.02738	7.02318	2.16882e-12	7.43246e-10
AravsEVm007000t3	26.022	20.7573	3.01233	6.89076	5.5497e-12	1.86528e-09
AravsEVm002241t3	32.3439	20.669	3.02725	6.82763	8.63259e-12	2.86021e-09
AravsEVm003531t1	30.0967	20.651	3.02733	6.82152	9.0081e-12	2.97055e-09
AravsEVm035133t1	28.5002	20.4578	3.02426	6.76454	1.3373e-11	4.36872e-09
AravsEVm003794t1	21.7532	20.4252	3.02777	6.74597	1.52012e-11	4.94287e-09
AravsEVm000559t1	14281.9	17.3282	1.75867	9.85301	6.65202e-23	1.55014e-18
AravsEVm008129t1	9725.11	16.7738	1.70159	9.85777	6.34437e-23	1.55014e-18
AravsEVm000025t1	6102.47	16.1015	1.83094	8.79412	1.44173e-18	1.67986e-14
AravsEVm020555t1	5011.14	15.8173	1.40985	11.2191	3.28536e-29	2.2968e-24
AravsEVm016862t1	2215.91	14.64	1.72767	8.47388	2.37349e-17	1.84367e-13
AravsEVm007292t1	1113.41	13.6471	1.82665	7.47113	7.95062e-14	5.23111e-11
AravsEVm006144t3	726.809	13.0318	2.17871	5.9814	2.21227e-09	6.4983e-07
AravsEVm000833t1	195.517	11.1374	1.81114	6.1494	7.77763e-10	2.32365e-07
AravsEVm020950t1	191.655	11.1087	1.61586	6.87475	6.2098e-12	2.06727e-09
AravsEVm016432t1	417.597	11.0954	3.02285	3.6705	0.000242074	0.0178894
AravsEVm038090t3	516.778	11.031	2.00736	5.4953	3.90045e-08	1.04076e-05
AravsEVm011929t3	134.805	10.601	2.08137	5.09328	3.51923e-07	8.31181e-05
AravsEVm002775t3	131.004	10.5599	2.56588	4.11549	3.86363e-05	0.00457807
AravsEVm008748t3	372.797	10.535	1.61156	6.53716	6.26992e-11	1.98339e-08
AravsEVm011888t3	121.338	10.4492	1.56332	6.68397	2.32548e-11	7.45753e-09
AravsEVm000833t7	180.421	10.4433	1.97976	5.27505	1.32723e-07	3.32569e-05
AravsEVm078921t2	115.571	10.379	2.6152	3.96871	7.22639e-05	0.00740758
AravsEVm026233t1	111.127	10.3223	2.59207	3.98226	6.82626e-05	0.00709099
AravsEVm021998t4	110.917	10.3195	2.64386	3.9032	9.49297e-05	0.00914012
AravsEVm006144t4	418.842	10.315	2.09198	4.93075	8.19147e-07	0.000177847
AravsEVm009650t2	104.26	10.2304	2.08834	4.89883	9.64106e-07	0.000206118
AravsEVm038090t1	1317.4	10.1924	1.92634	5.29106	1.21611e-07	3.06926e-05
AravsEVm004158t1	92.5603	10.0588	2.01521	4.99146	5.99245e-07	0.000135577
AravsEVm015780t1	749.221	10.0576	2.81339	3.5749	0.000350368	0.0228704
AravsEVm001734t4	91.4897	10.042	2.54834	3.94061	8.12752e-05	0.00808243
AravsEVm015121t1	91.1336	10.036	2.09293	4.7952	1.6251e-06	0.000328354
AravsEVm001027t2	90.3318	10.0233	2.05876	4.8686	1.12393e-06	0.000236668
AravsEVm043567t2	90.1196	10.02	2.03957	4.91282	8.9775e-07	0.000193113
AravsEVm005688t1	108.541	10.0031	2.53132	3.95174	7.75837e-05	0.00778175
AravsEVm002457t5	85.6568	9.947	2.5674	3.87434	0.000106913	0.00997905
AravsEVm000117t4	84.8976	9.93377	2.62668	3.78187	0.000155655	0.0130724
AravsEVm010302t3	84.3236	9.92424	2.62278	3.78386	0.000154416	0.0130058
AravsEVm015785t1	277.157	9.91818	2.99322	3.31355	0.00092119	0.0452212
AravsEVm006621t1	186.711	9.87583	1.97721	4.99482	5.88899e-07	0.000133669
AravsEVm068079t1	76.9666	9.79231	2.61559	3.74382	0.000181244	0.0146314
AravsEVm002520t1	376.841	9.70975	2.96209	3.27801	0.00104543	0.0497185
AravsEVm006144t1	625.81	9.70436	1.78574	5.43438	5.49875e-08	1.45613e-05
AravsEVm014190t2	560.668	9.69934	1.85578	5.22656	1.72691e-07	4.22127e-05
AravsEVm078454t1	104.245	9.65213	2.01955	4.77934	1.7587e-06	0.000353306
AravsEVm003059t2	69.4376	9.64371	2.56771	3.75577	0.000172809	0.0141134
AravsEVm006567t2	68.6762	9.62784	2.64871	3.63492	0.000278071	0.0194789
AravsEVm006778t3	90.2104	9.61068	2.45573	3.91357	9.09432e-05	0.00886728
AravsEVm010116t1	67.8404	9.61018	2.58168	3.72246	0.000197294	0.01555
AravsEVm022083t1	2491.82	9.56695	2.04689	4.6739	2.95535e-06	0.000550956
AravsEVm007875t1	65.6764	9.56392	2.64284	3.61881	0.000295959	0.0204654
AravsEVm007548t2	65.6419	9.5629	1.654	5.78168	7.39604e-09	2.10407e-06
AravsEVm008664t1	64.6093	9.54004	2.56345	3.72157	0.00019799	0.0155697
AravsEVm002127t1	62.8857	9.5009	2.52463	3.76329	0.000167693	0.0138618
AravsEVm003661t4	61.9854	9.4801	2.55694	3.7076	0.000209233	0.0162167
AravsEVm004933t1	61.3977	9.46623	2.52817	3.7443	0.000180899	0.0146314
AravsEVm014190t3	59.8027	9.42843	2.54965	3.69793	0.000217361	0.0166437
AravsEVm017890t1	80.7458	9.40405	2.8499	3.29979	0.000967585	0.0468772
AravsEVm006924t2	58.4318	9.39514	2.01833	4.65492	3.2411e-06	0.000601021
AravsEVm016468t4	58.1265	9.38752	2.59351	3.61962	0.000295035	0.0204217
AravsEVm051253t2	57.5935	9.37391	2.56101	3.66024	0.000251975	0.0182734
AravsEVm026566t1	57.5305	9.37255	2.62958	3.56428	0.000364851	0.0234007
AravsEVm003495t2	56.8165	9.35461	2.61318	3.57978	0.000343878	0.0225732
AravsEVm000833t5	56.2915	9.3411	2.51987	3.70698	0.000209744	0.0162383
AravsEVm008518t2	55.6486	9.32446	2.5362	3.67655	0.000236408	0.0175635
AravsEVm010008t4	54.7666	9.30165	2.5897	3.59178	0.000328424	0.021828
AravsEVm009009t3	54.1537	9.28525	2.5036	3.70876	0.000208273	0.0161602
AravsEVm009715t2	53.9959	9.28091	2.51508	3.69011	0.00022416	0.0168868
AravsEVm014190t7	117.825	9.27827	2.00131	4.63609	3.55056e-06	0.000643055
AravsEVm005780t2	53.4782	9.26714	2.54564	3.64039	0.000272223	0.0191653
AravsEVm010573t3	53.3893	9.26499	2.53027	3.66167	0.000250581	0.018236
AravsEVm013061t1	52.5635	9.24297	2.19545	4.21006	2.55308e-05	0.0032804
AravsEVm005637t1	51.7945	9.22065	2.03109	4.53977	5.63167e-06	0.000957932
AravsEVm004448t4	51.7642	9.2206	2.56716	3.59175	0.000328465	0.021828
AravsEVm003490t3	51.6939	9.21801	2.55242	3.61148	0.000304454	0.0208262
AravsEVm025828t1	72.7914	9.13213	1.92515	4.7436	2.09957e-06	0.000411151
AravsEVm006253t1	48.4657	9.12553	1.96498	4.64409	3.41577e-06	0.000623489
AravsEVm021880t1	48.3273	9.12092	2.04952	4.45027	8.57637e-06	0.00135073
AravsEVm005934t3	47.9377	9.10929	2.51852	3.61693	0.00029812	0.0205944
AravsEVm004005t4	47.9301	9.109	2.54888	3.57373	0.000351931	0.0229508
AravsEVm002301t1	47.8933	9.10823	2.54085	3.58471	0.00033745	0.0222258
AravsEVm001521t5	47.6996	9.1022	2.49824	3.64344	0.000269017	0.0190161
AravsEVm018642t4	47.5672	9.09803	2.02736	4.48763	7.20206e-06	0.00118268
AravsEVm015356t1	47.0537	9.08225	2.09156	4.34233	1.40979e-05	0.00204055
AravsEVm005396t6	46.8336	9.07582	2.55446	3.55293	0.000380961	0.0240846
AravsEVm015862t3	46.2448	9.05723	2.54667	3.5565	0.000375832	0.0238858
AravsEVm003488t2	46.0427	9.05141	2.55277	3.54572	0.000391536	0.0246781
AravsEVm049534t1	68.4379	9.04289	2.39397	3.77736	0.0001585	0.0132228
AravsEVm024453t1	45.4004	9.03113	2.56088	3.52657	0.000420974	0.0259838
AravsEVm010347t3	45.4046	9.03108	2.00863	4.49613	6.92014e-06	0.00114642
AravsEVm021265t2	45.1139	9.02175	2.52937	3.5668	0.000361371	0.0232843
AravsEVm000608t1	44.8457	9.01317	2.02313	4.45507	8.38659e-06	0.00133555
AravsEVm008253t3	44.5285	9.00343	2.01954	4.45817	8.26641e-06	0.00132244
AravsEVm005793t3	44.0002	8.98591	2.65879	3.3797	0.000725659	0.0381722
AravsEVm042110t3	43.4944	8.96872	2.00352	4.47649	7.58804e-06	0.00123081
AravsEVm019491t1	43.4075	8.96652	2.53332	3.53944	0.000400981	0.0251865
AravsEVm020990t1	57.2926	8.94729	2.5076	3.56807	0.000359622	0.0232144
AravsEVm018038t1	155.187	8.93696	2.41949	3.69374	0.00022098	0.0168181
AravsEVm038090t2	41.8212	8.9122	1.97363	4.51563	6.31274e-06	0.0010558
AravsEVm029188t7	41.6781	8.90797	2.04563	4.35464	1.33289e-05	0.0019535
AravsEVm010139t2	41.6381	8.9061	1.96871	4.52382	6.07345e-06	0.00102312
AravsEVm000388t6	41.0569	8.88561	2.49886	3.55587	0.000376731	0.0239212
AravsEVm025855t1	40.6957	8.87316	2.48894	3.56503	0.000363812	0.0233601
AravsEVm004288t6	40.6662	8.87172	2.5815	3.43665	0.000588957	0.0327297
AravsEVm012309t3	40.4458	8.86459	2.5688	3.45087	0.000558789	0.031504
AravsEVm044876t1	38.4408	8.79042	2.5809	3.40595	0.000659336	0.0356215
AravsEVm030297t1	38.2478	8.78383	2.56601	3.42314	0.000619021	0.0339951
AravsEVm007116t4	38.2351	8.78357	2.47576	3.54783	0.000388422	0.0245299
AravsEVm008420t4	37.8827	8.76938	2.58624	3.39078	0.00069693	0.03716
AravsEVm044074t3	55.8836	8.75021	1.96667	4.44924	8.61736e-06	0.00135076
AravsEVm012044t6	163.428	8.75004	1.95674	4.47175	7.75808e-06	0.00125548
AravsEVm068409t2	37.3326	8.74859	2.02252	4.32558	1.52128e-05	0.00216164
AravsEVm001302t7	37.1966	8.74382	2.52851	3.45809	0.000544012	0.0309735
AravsEVm004149t5	36.9355	8.73328	2.55485	3.41831	0.000630121	0.0344198
AravsEVm004931t2	36.6451	8.72252	1.97985	4.40565	1.05468e-05	0.0016205
AravsEVm060729t1	36.5361	8.71763	2.51105	3.47171	0.000517164	0.0299792
AravsEVm015113t2	36.0881	8.70016	2.47812	3.51079	0.000446783	0.0269496
AravsEVm041357t1	35.9993	8.69564	2.60944	3.33237	0.000861089	0.0431842
AravsEVm012663t4	35.3658	8.67121	2.26966	3.82049	0.000133187	0.0116188
AravsEVm010228t7	35.3132	8.66864	2.51642	3.44483	0.000571412	0.0320348
AravsEVm003745t1	35.2773	8.66658	2.51171	3.45047	0.000559611	0.0315249
AravsEVm006538t5	34.8839	8.65092	2.46298	3.51239	0.000444102	0.026904
AravsEVm016221t5	34.6609	8.64208	2.01288	4.29338	1.7597e-05	0.00242167
AravsEVm003193t2	34.4831	8.634	2.4884	3.4697	0.000521031	0.0301284
AravsEVm004340t9	988.264	8.63298	1.83871	4.69514	2.66421e-06	0.000503392
AravsEVm076675t1	34.2617	8.625	2.10435	4.09866	4.15556e-05	0.00481784
AravsEVm068761t1	34.2361	8.62332	2.566	3.36061	0.000777703	0.0400752
AravsEVm075810t1	51.0763	8.62069	1.9181	4.4944	6.9766e-06	0.00115155
AravsEVm021650t3	33.9669	8.61192	2.58254	3.33467	0.000853998	0.04291
AravsEVm035700t1	33.8928	8.60965	2.54024	3.38931	0.000700697	0.0372799
AravsEVm001142t1	50.2168	8.59619	2.38564	3.60331	0.000314196	0.0212432
AravsEVm033537t1	33.5253	8.59295	2.55341	3.36529	0.000764636	0.0396575
AravsEVm009377t1	33.3305	8.58479	2.48252	3.4581	0.000544004	0.0309735
AravsEVm006056t1	33.3224	8.5844	2.53491	3.38647	0.000707988	0.0375534
AravsEVm000173t5	33.2364	8.58066	2.50046	3.43163	0.000599969	0.033131
AravsEVm000257t6	33.0178	8.57188	2.47031	3.46996	0.000520535	0.0301247
AravsEVm001726t2	32.721	8.55904	2.47867	3.45308	0.000554226	0.0313225
AravsEVm013655t4	32.5716	8.55218	2.47101	3.46101	0.000538158	0.0307877
AravsEVm002967t2	32.4078	8.54409	2.50816	3.40652	0.000657965	0.0355749
AravsEVm034478t1	32.3105	8.53953	2.08159	4.10241	4.08867e-05	0.00478424
AravsEVm005950t1	32.2922	8.53891	2.49926	3.41658	0.000634128	0.0345533
AravsEVm014203t3	31.4493	8.50161	2.45864	3.45785	0.000544506	0.0309735
AravsEVm030708t3	31.2107	8.49048	2.56394	3.3115	0.000927963	0.0454299
AravsEVm003240t3	30.966	8.47862	2.48029	3.4184	0.000629916	0.0344198
AravsEVm006689t1	30.8827	8.47436	2.10715	4.02172	5.77738e-05	0.00627169
AravsEVm001891t3	30.1596	8.44118	1.93981	4.35156	1.35173e-05	0.00197698
AravsEVm005689t6	69.5705	8.43943	2.39311	3.52656	0.000420997	0.0259838
AravsEVm008206t2	30.1177	8.43842	2.53999	3.32223	0.000893017	0.0441519
AravsEVm013816t1	30.0658	8.43598	2.4832	3.39722	0.000680742	0.0365239
AravsEVm051361t2	29.9724	8.43223	2.44952	3.4424	0.000576575	0.0322467
AravsEVm003150t4	29.8605	8.42667	1.98252	4.25048	2.13315e-05	0.00285141
AravsEVm003882t1	29.8524	8.42531	2.04174	4.12653	3.68277e-05	0.00440107
AravsEVm015721t1	29.4909	8.40798	2.56591	3.2768	0.00104991	0.0498288
AravsEVm021546t2	29.3546	8.40183	2.46556	3.40768	0.000655171	0.0354787
AravsEVm007917t2	28.9639	8.38211	2.04431	4.10022	4.12755e-05	0.00480929
AravsEVm003215t5	444.278	8.37498	2.24166	3.73607	0.00018692	0.014975
AravsEVm007557t2	28.7392	8.37226	2.01509	4.15479	3.25584e-05	0.00397235
AravsEVm003592t2	28.6087	8.3645	2.08855	4.00493	6.20368e-05	0.00658525
AravsEVm022399t5	28.3806	8.35269	2.5395	3.28911	0.00100503	0.0482899
AravsEVm002115t2	27.9269	8.32937	1.98316	4.20004	2.66864e-05	0.00339421
AravsEVm000384t4	27.4171	8.30321	2.49451	3.32859	0.000872863	0.043401
AravsEVm005781t2	27.1068	8.28708	2.48733	3.33171	0.000863126	0.0432553
AravsEVm009400t1	40.5404	8.28667	1.98326	4.17831	2.93683e-05	0.00364678
AravsEVm019627t1	27.0613	8.28404	2.51292	3.29658	0.000978688	0.0473271
AravsEVm008706t5	27.0156	8.28288	2.5235	3.2823	0.00102966	0.0491689
AravsEVm008352t6	26.748	8.26759	1.99393	4.14639	3.37764e-05	0.00408531
AravsEVm032535t1	26.7406	8.26737	1.98019	4.17504	2.9794e-05	0.00368654
AravsEVm008136t1	26.6689	8.26372	2.52155	3.27723	0.0010483	0.0497869
AravsEVm011929t1	419.438	8.25236	2.16814	3.8062	0.00014112	0.0121349
AravsEVm002875t4	26.432	8.25129	2.01595	4.09301	4.25812e-05	0.00492042
AravsEVm006106t2	26.1786	8.2361	2.47701	3.32502	0.000884119	0.0438982
AravsEVm031924t2	26.1419	8.23505	2.44732	3.36492	0.000765649	0.0396787
AravsEVm008356t9	25.9026	8.22084	1.72819	4.75689	1.96594e-06	0.000390452
AravsEVm004882t1	154.805	8.2103	1.997	4.11132	3.93397e-05	0.00464567
AravsEVm002737t2	25.3644	8.19146	2.47288	3.31252	0.000924598	0.0452969
AravsEVm010238t5	25.1498	8.17817	2.03573	4.01731	5.88667e-05	0.00634607
AravsEVm001427t3	24.8249	8.15968	1.986	4.10861	3.98053e-05	0.00469273
AravsEVm009019t3	24.3989	8.13469	1.93889	4.19554	2.7222e-05	0.00342282
AravsEVm003260t2	24.0689	8.11617	2.47641	3.27739	0.0010477	0.0497869
AravsEVm014530t1	23.837	8.10164	2.01969	4.01133	6.0377e-05	0.00647385
AravsEVm007543t2	35.6929	8.10091	2.29983	3.52239	0.00042767	0.0261122
AravsEVm012592t6	23.7475	8.09582	2.04047	3.96762	7.2593e-05	0.00742284
AravsEVm021989t4	23.6663	8.09166	1.98583	4.0747	4.60728e-05	0.00527161
AravsEVm007565t1	23.4245	8.07626	2.46084	3.28191	0.00103106	0.0492023
AravsEVm052489t2	23.2811	8.06678	2.1015	3.83858	0.000123749	0.0110067
AravsEVm017451t1	395.158	8.05735	1.7018	4.7346	2.19486e-06	0.00042505
AravsEVm012808t2	22.9444	8.04584	2.26959	3.54506	0.000392523	0.0246804
AravsEVm004919t2	22.8915	8.04204	2.08464	3.85776	0.00011443	0.0104436
AravsEVm036282t1	22.5984	8.02403	2.11083	3.80136	0.000143907	0.0123178
AravsEVm008748t1	100.895	8.01857	1.60722	4.98909	6.06631e-07	0.000136805
AravsEVm025713t1	33.5751	8.01233	2.38088	3.36528	0.000764673	0.0396575
AravsEVm005613t3	22.1356	7.99467	2.43329	3.28553	0.00101789	0.0487069
AravsEVm006045t2	446.248	7.99099	1.73502	4.60571	4.1107e-06	0.000731838
AravsEVm001939t2	21.8538	7.97586	2.00059	3.98675	6.69833e-05	0.00698926
AravsEVm072310t3	21.6927	7.96508	1.94005	4.10561	4.03242e-05	0.00473792
AravsEVm033562t1	21.6445	7.96274	2.21666	3.59222	0.000327869	0.021828
AravsEVm011888t5	21.6556	7.96272	1.96804	4.04602	5.20958e-05	0.00580865
AravsEVm026407t1	21.2924	7.93786	2.13363	3.72035	0.000198944	0.0156271
AravsEVm006045t1	1343.44	7.92899	1.67567	4.73184	2.22492e-06	0.000428497
AravsEVm086265t1	21.0219	7.92022	2.04703	3.86913	0.000109226	0.0101108
AravsEVm080325t1	20.7069	7.89904	2.04934	3.85443	0.000115998	0.0105591
AravsEVm035688t1	88.288	7.89458	2.06637	3.8205	0.000133181	0.0116188
AravsEVm028157t1	29.7082	7.83683	2.26408	3.46138	0.000537424	0.0307877
AravsEVm014498t3	19.559	7.8151	2.0787	3.75961	0.000170177	0.0139546
AravsEVm021579t3	207.227	7.80258	1.83943	4.24185	2.21688e-05	0.00293527
AravsEVm007618t4	19.277	7.79563	2.01958	3.86003	0.000113375	0.010388
AravsEVm008121t2	19.0409	7.77635	2.08647	3.72703	0.000193749	0.0153746
AravsEVm025876t2	18.7763	7.7574	2.07938	3.73064	0.000190998	0.0152776
AravsEVm013996t4	28.085	7.75504	1.88562	4.11273	3.91006e-05	0.00462525
AravsEVm070214t1	18.7361	7.75435	2.12734	3.64508	0.000267306	0.0189934
AravsEVm010232t1	18.6391	7.74826	2.06954	3.74395	0.000181151	0.0146314
AravsEVm003170t4	483.723	7.74242	1.9388	3.99341	6.51306e-05	0.00685735
AravsEVm065916t1	18.2676	7.71671	2.16953	3.55686	0.000375314	0.0238746
AravsEVm017573t1	774.501	7.69276	2.33683	3.29196	0.000994913	0.0479355
AravsEVm005142t1	17.1139	7.62453	2.17873	3.49952	0.000466089	0.0277313
AravsEVm000677t7	17.132	7.62452	2.12424	3.58929	0.000331586	0.0219652
AravsEVm063989t2	17.0668	7.61821	1.96842	3.87022	0.000108737	0.0101088
AravsEVm031471t3	16.9828	7.61177	1.96273	3.87815	0.000105254	0.00986364
AravsEVm005802t1	16.9692	7.61002	2.12253	3.58535	0.000336626	0.022207
AravsEVm066446t1	16.853	7.6015	2.06583	3.67964	0.000233567	0.0173894
AravsEVm080027t1	16.6692	7.58575	2.10626	3.60153	0.000316347	0.0213408
AravsEVm001726t4	37.9901	7.58564	1.46936	5.16256	2.43598e-07	5.85221e-05
AravsEVm075247t1	199.742	7.57072	1.7012	4.45021	8.57852e-06	0.00135073
AravsEVm004928t3	16.1696	7.53985	2.04194	3.69249	0.000222066	0.0168334
AravsEVm102365t2	15.7855	7.50799	1.73304	4.33226	1.47586e-05	0.00211424
AravsEVm029177t1	23.6328	7.50481	2.26555	3.31258	0.000924396	0.0452969
AravsEVm038093t1	36.0795	7.49589	2.05606	3.64575	0.000266613	0.0189806
AravsEVm021273t5	15.4944	7.47923	2.05985	3.63097	0.000282361	0.0197005
AravsEVm013368t1	71.1583	7.47879	2.21704	3.37331	0.000742694	0.0388636
AravsEVm052489t1	35.2329	7.46801	1.75022	4.26689	1.98214e-05	0.00268029
AravsEVm033318t1	33.5403	7.45967	1.91297	3.89953	9.63796e-05	0.00921321
AravsEVm017088t1	35.0649	7.45448	1.92792	3.8666	0.000110365	0.0101655
AravsEVm008145t2	15.1685	7.44903	2.00531	3.71466	0.000203478	0.0159118
AravsEVm039664t1	14.9402	7.42745	1.99372	3.72542	0.00019499	0.0154031
AravsEVm065916t3	34.4059	7.4234	2.15905	3.43827	0.000585444	0.0325863
AravsEVm011916t4	22.1002	7.40596	2.02632	3.65487	0.00025731	0.0185832
AravsEVm049684t4	14.7215	7.40523	2.01376	3.67731	0.000235707	0.0175301
AravsEVm007798t2	14.5519	7.38818	2.03468	3.63113	0.000282188	0.0197005
AravsEVm070319t3	129.86	7.37228	1.83376	4.02031	5.81209e-05	0.00629958
AravsEVm020679t1	21.2127	7.34955	1.99052	3.69229	0.000222247	0.0168334
AravsEVm069596t1	21.097	7.33958	1.43035	5.13131	2.87726e-07	6.86516e-05
AravsEVm011312t1	384.094	7.33812	1.59333	4.60554	4.11404e-06	0.000731838
AravsEVm032000t1	13.9728	7.33001	1.96951	3.72174	0.000197854	0.0155697
AravsEVm011828t2	13.9468	7.32742	2.02742	3.61416	0.000301327	0.0207137
AravsEVm026752t1	13.8798	7.32235	2.12557	3.44488	0.000571307	0.0320348
AravsEVm031426t1	20.6036	7.30769	1.85019	3.94971	7.82474e-05	0.00782586
AravsEVm043261t1	13.6994	7.30258	2.18847	3.33684	0.000847362	0.0427102
AravsEVm055640t1	13.4943	7.2808	1.91536	3.80128	0.000143951	0.0123178
AravsEVm004688t8	13.4783	7.28067	2.16204	3.36751	0.000758508	0.0395431
AravsEVm072300t1	13.336	7.26485	2.06238	3.52255	0.000427419	0.0261122
AravsEVm002239t1	135.379	7.26353	2.07247	3.50476	0.000457013	0.0273075
AravsEVm017535t4	13.2289	7.25204	1.98566	3.6522	0.000259999	0.0187387
AravsEVm001669t2	164.856	7.23206	1.88051	3.84579	0.000120165	0.0107426
AravsEVm042446t1	143.962	7.23098	2.14079	3.37771	0.000730916	0.0383621
AravsEVm024877t2	13.0246	7.22834	2.0519	3.52275	0.000427097	0.0261122
AravsEVm009447t6	275.794	7.22005	1.67971	4.2984	1.72037e-05	0.0023722
AravsEVm024708t2	152.012	7.21228	2.04369	3.52905	0.00041705	0.0258704
AravsEVm030881t1	12.8196	7.20712	1.96098	3.67527	0.000237594	0.0176135
AravsEVm013985t1	29.2469	7.19105	2.0178	3.56381	0.000365509	0.0234214
AravsEVm009508t1	45.0098	7.17164	1.91903	3.73711	0.000186144	0.0149566
AravsEVm022771t1	12.4758	7.16599	2.0789	3.44701	0.00056682	0.031854
AravsEVm010939t1	28.5497	7.1534	2.00941	3.55994	0.000370934	0.0236606
AravsEVm012723t1	18.2363	7.13192	1.41722	5.03234	4.8453e-07	0.000111426
AravsEVm016205t2	11.9605	7.10518	2.03345	3.49415	0.000475569	0.028109
AravsEVm056726t1	11.8285	7.09304	1.85133	3.83133	0.000127454	0.0111939
AravsEVm075810t2	126.463	7.08354	1.4327	4.94419	7.64626e-07	0.000167047
AravsEVm016832t1	11.6082	7.06207	1.95273	3.61651	0.000298605	0.0206076
AravsEVm053050t2	88.5151	7.03275	2.12926	3.30291	0.000956866	0.0464545
AravsEVm012297t4	11.3324	7.02749	1.98771	3.53548	0.000407037	0.0254076
AravsEVm006778t1	198.679	7.02485	2.11515	3.32121	0.000896271	0.0442815
AravsEVm005268t1	47.9873	7.01339	2.02913	3.45635	0.00054754	0.0310955
AravsEVm009148t6	11.1812	7.00782	2.02167	3.46636	0.000527558	0.0303802
AravsEVm017141t1	1099.59	7.00566	1.49873	4.67441	2.94807e-06	0.000550956
AravsEVm019495t1	11.1488	7.00377	1.9505	3.59075	0.000329722	0.0218906
AravsEVm015877t1	16.6629	7.0015	1.86581	3.75253	0.000175059	0.0142473
AravsEVm004969t1	11.0886	6.99633	2.06535	3.38747	0.000705398	0.0374566
AravsEVm005312t3	10.8996	6.97477	2.01111	3.46811	0.000524127	0.0302574
AravsEVm031881t1	24.4692	6.93382	1.91197	3.62653	0.000287253	0.0199905
AravsEVm004447t1	15.8312	6.92383	1.83088	3.7817	0.000155762	0.0130724
AravsEVm015540t2	10.4584	6.91471	1.95532	3.53635	0.000405695	0.0254076
AravsEVm010377t4	10.3728	6.90145	2.06554	3.34123	0.000834077	0.0421622
AravsEVm008992t1	181.884	6.89915	1.41788	4.86583	1.13977e-06	0.000238761
AravsEVm024975t1	149.514	6.89468	1.63601	4.21433	2.50515e-05	0.00324378
AravsEVm017028t1	23.4348	6.8664	1.95819	3.50651	0.000454023	0.0271986
AravsEVm008051t5	58.5894	6.86167	1.95867	3.50323	0.000459654	0.0274184
AravsEVm026276t1	15.2035	6.86139	1.94642	3.52513	0.000423273	0.0260063
AravsEVm021579t1	430.695	6.85759	1.78233	3.84754	0.000119309	0.0107209
AravsEVm009595t3	9.78416	6.8195	2.0152	3.38402	0.000714316	0.0377745
AravsEVm014003t3	145.973	6.81208	1.86926	3.64427	0.000268151	0.0189934
AravsEVm041802t1	255.505	6.81103	1.48231	4.59488	4.33001e-06	0.000762497
AravsEVm001427t4	9.6458	6.79454	2.00221	3.39353	0.000689988	0.0369188
AravsEVm004742t3	935.328	6.79272	1.68862	4.02263	5.75506e-05	0.00625718
AravsEVm014092t3	32.522	6.79084	2.00577	3.38565	0.000710092	0.037608
AravsEVm019674t1	22.2249	6.78756	2.0213	3.35801	0.000785056	0.0403257
AravsEVm025957t2	413.968	6.78427	1.60603	4.22426	2.39729e-05	0.0031326
AravsEVm065959t1	9.53438	6.77959	2.03549	3.3307	0.000866282	0.0433203
AravsEVm011312t5	325.995	6.7702	1.74316	3.88386	0.000102812	0.00971298
AravsEVm066826t1	21.1976	6.73019	1.7394	3.86927	0.000109164	0.0101108
AravsEVm022064t1	21.2717	6.72695	1.9214	3.50106	0.000463409	0.0276189
AravsEVm009137t2	30.8805	6.71604	1.96766	3.41321	0.000642017	0.0349016
AravsEVm009647t3	74.5955	6.65871	1.82974	3.63915	0.000273537	0.019219
AravsEVm065723t2	8.30836	6.57934	1.98517	3.31425	0.000918894	0.0451757
AravsEVm043567t1	57.673	6.57682	1.74	3.77978	0.000156965	0.0131418
AravsEVm014812t2	12.4374	6.56917	1.82039	3.60866	0.000307784	0.0209923
AravsEVm016897t4	18.0295	6.48923	1.76953	3.6672	0.000245217	0.0180264
AravsEVm010540t2	17.5295	6.44388	1.87159	3.443	0.000575309	0.0322017
AravsEVm081726t1	119.22	6.39429	1.75691	3.6395	0.000273165	0.0192123
AravsEVm037756t1	10.8377	6.36869	1.9292	3.30121	0.000962678	0.0467043
AravsEVm021579t2	466.854	6.35004	1.40222	4.52855	5.93887e-06	0.00100287
AravsEVm025522t1	10.6865	6.34797	1.9115	3.32094	0.000897134	0.0442928
AravsEVm068407t1	181.337	6.34258	1.50516	4.21388	2.5102e-05	0.00324378
AravsEVm021498t2	10.1695	6.28266	1.81174	3.46776	0.000524824	0.0302681
AravsEVm090394t1	6.67256	6.26604	1.66544	3.7624	0.00016829	0.013874
AravsEVm033794t1	457.417	6.26025	1.12127	5.58318	2.36166e-08	6.44935e-06
AravsEVm070320t1	53.3072	6.23272	1.77391	3.51354	0.000442179	0.0268573
AravsEVm002935t4	107.582	6.21885	1.59824	3.89106	9.98075e-05	0.00948036
AravsEVm038060t1	46.2581	6.21217	1.58917	3.90907	9.26527e-05	0.00900884
AravsEVm015363t2	22.9752	6.18793	1.85877	3.32905	0.000871413	0.0433739
AravsEVm009447t1	912.222	6.17559	1.59513	3.87154	0.000108149	0.010081
AravsEVm000649t5	260.826	6.16679	1.83812	3.35495	0.000793799	0.0406553
AravsEVm057294t3	9.14791	6.12585	1.82643	3.35401	0.0007965	0.0407638
AravsEVm006716t4	187.355	6.11625	1.49211	4.09907	4.14816e-05	0.00481784
AravsEVm004214t1	218.345	6.10671	1.80677	3.37991	0.000725107	0.0381718
AravsEVm013149t1	91.614	6.10374	1.68313	3.62642	0.000287376	0.0199905
AravsEVm051353t1	215.364	6.09648	1.55223	3.92757	8.58079e-05	0.00848313
AravsEVm030477t3	126.262	6.08068	1.61492	3.76532	0.000166334	0.0137778
AravsEVm039734t1	1300.38	6.06125	1.45033	4.17922	2.92515e-05	0.00363874
AravsEVm033575t4	5.73111	6.04799	1.75824	3.4398	0.000582142	0.0324542
AravsEVm010326t1	200.846	6.04338	1.34828	4.48227	7.38529e-06	0.00120632
AravsEVm010375t2	21.1925	6.04085	1.5584	3.87631	0.000106051	0.00991179
AravsEVm011471t1	444.641	6.03746	1.82165	3.31428	0.000918784	0.0451757
AravsEVm001151t2	8.53734	6.02556	1.59488	3.77806	0.000158055	0.0132015
AravsEVm014949t4	171.109	5.97949	1.56902	3.81097	0.000138423	0.0119767
AravsEVm044074t2	50.3873	5.94962	1.72864	3.44178	0.000577892	0.0322945
AravsEVm039359t1	219.935	5.94601	1.13489	5.23927	1.61212e-07	3.98245e-05
AravsEVm009148t4	52.4947	5.90159	1.77945	3.31652	0.000911461	0.0448734
AravsEVm026117t1	55.7509	5.9001	1.74881	3.37377	0.000741451	0.0388276
AravsEVm015669t1	75.3235	5.88417	1.70069	3.45988	0.000540412	0.0308662
AravsEVm008984t2	92.9243	5.88053	1.68299	3.49411	0.000475653	0.028109
AravsEVm004933t2	2525.31	5.86805	1.76533	3.32406	0.000887157	0.0440001
AravsEVm073525t2	122.309	5.86071	1.68399	3.48025	0.000500945	0.0292855
AravsEVm011929t5	520.022	5.8573	1.68086	3.4847	0.000492683	0.0289441
AravsEVm027393t4	450.656	5.85253	1.40854	4.15504	3.25231e-05	0.00397235
AravsEVm087361t1	11.4607	5.8303	1.77953	3.27632	0.00105169	0.0498465
AravsEVm001187t2	295.829	5.81992	1.73165	3.36091	0.000776853	0.0400752
AravsEVm022963t1	58.8834	5.81745	1.69736	3.42735	0.000609493	0.0335245
AravsEVm024474t1	4526.61	5.80124	1.42024	4.0847	4.41343e-05	0.00507472
AravsEVm015019t1	322.57	5.79496	1.38407	4.1869	2.82792e-05	0.00352886
AravsEVm015397t1	33.1182	5.79408	1.41192	4.10369	4.06618e-05	0.00476958
AravsEVm005560t1	1032.53	5.79322	1.33384	4.34327	1.40375e-05	0.00204025
AravsEVm050829t2	88.8289	5.77576	1.76272	3.27661	0.0010506	0.0498288
AravsEVm012592t3	104.072	5.66686	1.47164	3.85071	0.000117776	0.0106617
AravsEVm023217t4	411.638	5.66088	1.56328	3.62116	0.000293291	0.0203211
AravsEVm025725t1	1941.64	5.63994	1.16549	4.83911	1.3042e-06	0.000267381
AravsEVm007872t2	35.1027	5.63565	1.70466	3.30603	0.000946282	0.046137
AravsEVm020684t1	90.3823	5.5863	1.67734	3.33046	0.000867015	0.043326
AravsEVm025725t2	5329.99	5.57106	1.21996	4.56659	4.95712e-06	0.00086207
AravsEVm026117t2	65.6422	5.56908	1.67578	3.32328	0.000889657	0.0440793
AravsEVm009447t3	681.612	5.5521	1.04812	5.29718	1.17605e-07	3.00065e-05
AravsEVm002439t2	701.187	5.52368	0.955472	5.7811	7.42124e-09	2.10407e-06
AravsEVm024473t1	4722.49	5.50215	1.18463	4.64462	3.40701e-06	0.000623489
AravsEVm012665t3	13.2967	5.4969	1.47972	3.71483	0.000203337	0.0159118
AravsEVm011888t1	910.984	5.49443	0.945026	5.81405	6.09793e-09	1.74716e-06
AravsEVm051353t2	306.542	5.49373	1.64665	3.3363	0.000849003	0.0427313
AravsEVm004349t1	3105.7	5.48066	1.46212	3.74844	0.000177937	0.0144311
AravsEVm031042t2	8.84423	5.44949	1.56069	3.49171	0.00047993	0.02829
AravsEVm063476t1	33.7432	5.38548	1.51559	3.55338	0.000380317	0.0240846
AravsEVm074352t1	20.9071	5.3806	1.51689	3.54712	0.000389473	0.024574
AravsEVm025212t1	25.2289	5.36767	1.35322	3.96658	7.29098e-05	0.00744106
AravsEVm040757t1	165.709	5.35985	1.5238	3.51742	0.000435759	0.0265365
AravsEVm036843t1	131.501	5.35535	1.37298	3.90052	9.59867e-05	0.00919237
AravsEVm037076t2	227.403	5.35265	1.53833	3.47952	0.000502317	0.0292855
AravsEVm001264t1	744.247	5.35095	1.18016	4.53411	5.78477e-06	0.000981586
AravsEVm025477t1	200.489	5.32578	1.58199	3.3665	0.000761287	0.0396575
AravsEVm020592t1	44.3651	5.31294	1.58144	3.35957	0.000780649	0.0401879
AravsEVm006122t2	37.9516	5.30928	1.42422	3.72785	0.000193123	0.0153619
AravsEVm007025t2	31.892	5.2886	1.34875	3.92112	8.81394e-05	0.00867863
AravsEVm066661t2	35.546	5.28195	1.50643	3.50628	0.000454423	0.0271992
AravsEVm063989t1	168.714	5.25444	1.43596	3.65917	0.000253029	0.0183288
AravsEVm083938t1	12.4943	5.25158	1.46034	3.59614	0.000322969	0.0216064
AravsEVm012728t2	42.6533	5.23945	1.45648	3.59735	0.000321474	0.0215684
AravsEVm041104t1	11613.5	5.23596	1.07861	4.85435	1.20784e-06	0.00025131
AravsEVm004689t1	9956.07	5.22923	1.12461	4.64982	3.32225e-06	0.000612819
AravsEVm012592t1	230.496	5.21993	1.29882	4.01897	5.84531e-05	0.00632578
AravsEVm004721t1	508.009	5.19165	0.986929	5.2604	1.43739e-07	3.57608e-05
AravsEVm020811t4	56.8552	5.18402	1.23554	4.19577	2.7195e-05	0.00342282
AravsEVm025984t1	2692.51	5.14715	1.35671	3.79385	0.00014833	0.0126306
AravsEVm004742t1	1613.9	5.14153	1.33193	3.86022	0.000113283	0.010388
AravsEVm001727t1	320.849	5.13471	1.21896	4.21237	2.52701e-05	0.00325947
AravsEVm013702t1	101.215	5.10675	1.06013	4.81708	1.45674e-06	0.000296049
AravsEVm044439t1	201.67	5.10594	1.34945	3.78372	0.000154504	0.0130058
AravsEVm063989t3	150.291	5.0716	1.47551	3.43718	0.0005878	0.0326914
AravsEVm067627t1	117.728	5.0703	1.26249	4.01612	5.91644e-05	0.00636336
AravsEVm011888t4	330.741	5.05104	1.10889	4.55504	5.23746e-06	0.00090185
AravsEVm041209t3	19.4444	5.04435	1.33708	3.77265	0.000161521	0.0134428
AravsEVm026732t1	375.593	5.02886	1.41164	3.56243	0.000367438	0.0235019
AravsEVm062443t1	138.815	5.02049	1.51626	3.3111	0.00092931	0.045464
AravsEVm056317t2	428.465	5.00534	1.28961	3.88128	0.000103906	0.00977669
AravsEVm014948t2	202.081	4.97649	1.25694	3.95921	7.5198e-05	0.00759696
AravsEVm057645t1	14.5491	4.96379	1.50155	3.30578	0.000947125	0.046137
AravsEVm014949t5	167.502	4.96096	1.46021	3.39742	0.000680248	0.0365239
AravsEVm081077t1	256.795	4.94738	1.08672	4.5526	5.29875e-06	0.000907931
AravsEVm053647t1	164.172	4.93589	1.04121	4.74052	2.13174e-06	0.000416284
AravsEVm008685t3	780.617	4.88587	1.03436	4.72357	2.31742e-06	0.000442652
AravsEVm016507t3	62.0889	4.87515	1.40841	3.46147	0.000537239	0.0307877
AravsEVm001626t2	966.541	4.86894	1.02098	4.76887	1.85262e-06	0.000370048
AravsEVm016928t1	65.0849	4.86429	0.934174	5.20705	1.91868e-07	4.6737e-05
AravsEVm009970t3	188.655	4.84715	1.00164	4.83922	1.30349e-06	0.000267381
AravsEVm010668t1	520.709	4.8209	1.04695	4.60472	4.13017e-06	0.000732843
AravsEVm001945t1	382.442	4.82062	1.27814	3.7716	0.000162206	0.0134677
AravsEVm021539t1	300.49	4.80199	0.908682	5.28457	1.26003e-07	3.16866e-05
AravsEVm009650t1	1070.99	4.79909	1.01404	4.73263	2.21626e-06	0.000428008
AravsEVm011919t1	75.5498	4.76531	1.22209	3.89931	9.64679e-05	0.00921321
AravsEVm005367t5	27.6037	4.75414	1.4183	3.352	0.000802288	0.0409782
AravsEVm015472t1	248.037	4.74673	1.36695	3.4725	0.000515637	0.0299155
AravsEVm014948t1	144.767	4.72842	1.31563	3.59402	0.00032561	0.0217416
AravsEVm025147t2	254.437	4.67447	1.30461	3.58305	0.000339607	0.0223249
AravsEVm017767t1	814.71	4.6648	0.766403	6.08662	1.15322e-09	3.41617e-07
AravsEVm010377t1	185.739	4.5995	0.927288	4.96016	7.04339e-07	0.000155332
AravsEVm010302t1	465.942	4.57867	1.07778	4.24823	2.15469e-05	0.00286377
AravsEVm015149t1	435.931	4.57184	1.34456	3.40024	0.000673263	0.0362897
AravsEVm015121t4	307.961	4.56163	0.992046	4.5982	4.26147e-06	0.000754226
AravsEVm006431t1	4863.14	4.53427	0.905371	5.00819	5.49434e-07	0.000125937
AravsEVm005001t3	367.241	4.52416	1.37636	3.28705	0.00101243	0.0485118
AravsEVm033794t3	772.107	4.5187	1.148	3.93615	8.28e-05	0.00822237
AravsEVm023242t1	11077.1	4.50822	1.22918	3.66766	0.000244782	0.0180151
AravsEVm002822t1	2203	4.49771	0.915389	4.91345	8.94895e-07	0.000193093
AravsEVm037097t3	3182.87	4.46425	1.20219	3.71342	0.000204476	0.0159372
AravsEVm014064t2	212.679	4.42919	0.933565	4.74438	2.09143e-06	0.000410708
AravsEVm002813t1	300.502	4.42092	1.13168	3.90651	9.36382e-05	0.00906549
AravsEVm036332t1	912.277	4.40413	0.911516	4.83165	1.35405e-06	0.000276788
AravsEVm007381t1	2461.59	4.40236	0.851892	5.16774	2.36936e-07	5.7118e-05
AravsEVm009948t4	242.386	4.40058	0.950361	4.63043	3.64901e-06	0.000659179
AravsEVm015121t5	104.273	4.36347	1.09924	3.96952	7.20186e-05	0.00739327
AravsEVm038630t1	22.0992	4.32651	1.29275	3.34675	0.000817661	0.0415593
AravsEVm014734t4	1929.21	4.28836	1.05612	4.06047	4.89743e-05	0.00552224
AravsEVm009647t1	566.973	4.2779	1.21419	3.52326	0.000426274	0.0260953
AravsEVm009272t5	24.7095	4.27455	1.1824	3.61515	0.000300178	0.0206753
AravsEVm006303t4	219.506	4.26521	1.23003	3.46757	0.000525179	0.0302681
AravsEVm011414t2	232.071	4.24321	1.18429	3.58292	0.000339776	0.0223249
AravsEVm038371t1	100.335	4.22232	0.977348	4.32018	1.55902e-05	0.00219766
AravsEVm011718t2	532.589	4.20651	1.10935	3.79187	0.000149519	0.0127009
AravsEVm040696t1	31.0825	4.19843	1.19208	3.52194	0.000428401	0.026134
AravsEVm006717t4	178.375	4.19579	1.03755	4.04393	5.25628e-05	0.00584804
AravsEVm011521t1	257.175	4.19313	1.13057	3.70885	0.0002082	0.0161602
AravsEVm019988t1	8478.23	4.18687	1.23204	3.39832	0.000678023	0.036462
AravsEVm009435t1	172.627	4.18337	1.19649	3.49637	0.000471639	0.0279663
AravsEVm019366t1	199.411	4.18259	0.895218	4.67215	2.98066e-06	0.000554197
AravsEVm028378t1	370.389	4.1803	0.966798	4.32386	1.53321e-05	0.00217418
AravsEVm007583t3	883.646	4.16616	1.12857	3.69153	0.000222911	0.016836
AravsEVm014734t2	1424.83	4.16438	1.0856	3.83603	0.000125038	0.0110791
AravsEVm009266t1	806.846	4.15689	1.16825	3.55823	0.000373357	0.0237934
AravsEVm009173t1	3124.12	4.14222	0.954288	4.34064	1.42072e-05	0.00205211
AravsEVm006717t8	195.853	4.13399	1.20531	3.42982	0.000603976	0.0332962
AravsEVm009617t2	55.1074	4.10779	1.22809	3.34485	0.000823268	0.0417365
AravsEVm013685t1	57.7795	4.09066	1.05211	3.88806	0.000101048	0.00957215
AravsEVm004294t1	1172.74	4.07398	1.13631	3.58528	0.000336711	0.022207
AravsEVm006887t1	3678.1	4.03496	0.958918	4.20783	2.57835e-05	0.00330133
AravsEVm018642t1	185.304	4.02747	1.10705	3.63803	0.000274731	0.0192836
AravsEVm038668t1	205.866	4.02598	1.15567	3.48367	0.000494589	0.0290041
AravsEVm010473t3	703.274	3.97495	1.05677	3.76144	0.000168941	0.0138949
AravsEVm007872t1	359.496	3.96482	0.817738	4.84852	1.24385e-06	0.000256512
AravsEVm026849t1	149.429	3.96394	1.12273	3.53062	0.000414594	0.0257409
AravsEVm015536t1	209.611	3.9604	0.926368	4.2752	1.90968e-05	0.00259739
AravsEVm042575t5	183.735	3.95493	1.18804	3.32896	0.000871696	0.0433739
AravsEVm009970t1	2496.38	3.94403	0.859908	4.58657	4.50581e-06	0.00079146
AravsEVm022997t1	988.788	3.93421	1.04544	3.76321	0.000167745	0.0138618
AravsEVm043231t1	524.766	3.93247	1.14551	3.43294	0.000597067	0.0330491
AravsEVm026118t4	132.316	3.90944	1.06957	3.65516	0.000257026	0.0185819
AravsEVm004896t1	2182.34	3.90543	1.03882	3.75948	0.000170266	0.0139546
AravsEVm004456t3	172.498	3.87851	1.17519	3.30033	0.000965706	0.0468187
AravsEVm012010t1	750.019	3.87196	0.917935	4.21813	2.46341e-05	0.00320794
AravsEVm012143t1	421.619	3.85789	0.888344	4.34278	1.4069e-05	0.00204055
AravsEVm006141t4	700.526	3.85687	1.06685	3.61519	0.000300127	0.0206753
AravsEVm003130t1	1094.39	3.85207	0.950316	4.05346	5.04647e-05	0.0056689
AravsEVm025590t1	8226.89	3.8188	0.986674	3.87038	0.000108667	0.0101088
AravsEVm072013t1	10.7568	3.8038	1.1194	3.39808	0.000678615	0.0364658
AravsEVm049537t2	215.57	3.79965	1.11012	3.42275	0.000619912	0.0340173
AravsEVm016507t2	121.093	3.78607	1.14484	3.30707	0.00094276	0.0460254
AravsEVm034409t3	42.9621	3.78501	1.01172	3.74115	0.000183183	0.0147709
AravsEVm005961t1	559.803	3.76824	1.01938	3.6966	0.000218507	0.0167012
AravsEVm020811t1	97.9715	3.76561	0.978151	3.84972	0.000118253	0.0106743
AravsEVm010668t2	255.822	3.7593	1.06331	3.53547	0.000407046	0.0254076
AravsEVm022372t4	10251.7	3.75816	1.14297	3.28805	0.00100883	0.0484059
AravsEVm012187t1	1543.28	3.73583	0.880882	4.24101	2.22518e-05	0.00294068
AravsEVm021647t3	23.8315	3.72913	1.12812	3.30561	0.000947686	0.046137
AravsEVm006627t1	726.62	3.72796	0.826706	4.50941	6.5007e-06	0.00107949
AravsEVm023716t1	43.9659	3.7243	0.991349	3.7568	0.000172098	0.0140718
AravsEVm007946t1	64.4726	3.71397	0.882766	4.20719	2.58562e-05	0.00330458
AravsEVm011578t1	1587.95	3.70664	0.827692	4.47828	7.52469e-06	0.00122337
AravsEVm002403t29	141.889	3.69489	1.00921	3.66117	0.000251071	0.0182457
AravsEVm022967t7	2655.16	3.69441	1.0384	3.55778	0.000374004	0.023813
AravsEVm011718t1	436.408	3.6873	0.895579	4.11723	3.83461e-05	0.00455914
AravsEVm019609t1	293.749	3.66932	1.00212	3.66157	0.000250677	0.018236
AravsEVm006312t1	1634.99	3.66232	0.931284	3.93254	8.4052e-05	0.00832306
AravsEVm021153t2	674.259	3.65244	0.845442	4.32015	1.5592e-05	0.00219766
AravsEVm016386t3	132.529	3.65186	1.02411	3.5659	0.000362615	0.0233429
AravsEVm002952t2	305.508	3.65017	0.81675	4.46914	7.85355e-06	0.001268
AravsEVm000948t3	1732.88	3.64902	1.02137	3.57265	0.000353382	0.0229665
AravsEVm006423t2	807.792	3.62872	1.00895	3.59654	0.000322482	0.0215945
AravsEVm015192t2	177.725	3.62715	0.952808	3.80679	0.00014078	0.0121206
AravsEVm008212t1	33.7515	3.62113	1.09278	3.3137	0.0009207	0.0452212
AravsEVm024987t2	118.068	3.6209	0.764728	4.73489	2.19176e-06	0.00042505
AravsEVm006303t2	848.924	3.58663	0.950834	3.77208	0.00016189	0.0134575
AravsEVm020289t1	1473.76	3.57088	0.993551	3.59405	0.000325572	0.0217416
AravsEVm025425t1	315.688	3.56367	0.93057	3.82956	0.000128374	0.0112605
AravsEVm006451t5	171.612	3.56026	0.950578	3.74537	0.000180129	0.0145919
AravsEVm002311t2	163.669	3.5446	0.810801	4.37172	1.2327e-05	0.00184141
AravsEVm016386t1	2512.97	3.52783	1.0365	3.40358	0.000665092	0.0359047
AravsEVm007583t1	983.985	3.52604	1.02631	3.43565	0.000591129	0.0328137
AravsEVm018637t2	211.386	3.52084	1.07322	3.28062	0.00103579	0.0493945
AravsEVm002952t1	759.303	3.49733	1.05692	3.30898	0.000936362	0.045745
AravsEVm079477t1	30.2003	3.49602	0.909587	3.84353	0.000121278	0.0108283
AravsEVm015192t1	389.844	3.48595	0.986647	3.53313	0.000410677	0.0255431
AravsEVm022087t1	240.072	3.47188	0.971064	3.57534	0.000349777	0.0228532
AravsEVm017949t1	513.935	3.46904	0.858982	4.03854	5.37845e-05	0.00594948
AravsEVm019289t1	125.352	3.45656	0.871795	3.96488	7.34314e-05	0.00748337
AravsEVm049077t1	252.219	3.45424	0.919388	3.75711	0.000171884	0.0140708
AravsEVm020581t1	413.581	3.39213	0.838871	4.04369	5.26165e-05	0.00584804
AravsEVm027500t2	108.143	3.38877	0.876128	3.86789	0.00010978	0.0101384
AravsEVm012539t2	1350.82	3.38509	0.956706	3.53827	0.000402757	0.0252527
AravsEVm006717t1	375.879	3.37824	0.997301	3.38738	0.000705627	0.0374566
AravsEVm081726t2	374.272	3.37815	0.994033	3.39843	0.000677736	0.036462
AravsEVm018721t2	573.441	3.35876	0.870893	3.85668	0.000114935	0.010476
AravsEVm025595t1	881.731	3.334	1.00932	3.30321	0.000955858	0.0464378
AravsEVm017159t2	414.79	3.32994	0.797036	4.1779	2.94211e-05	0.00364686
AravsEVm010630t1	358.601	3.29774	0.935323	3.52577	0.00042225	0.0260063
AravsEVm010630t2	219.683	3.29279	0.978912	3.36372	0.000768984	0.039822
AravsEVm005396t5	101.066	3.2761	0.887714	3.69049	0.000223819	0.0168794
AravsEVm006547t1	536.736	3.26077	0.793951	4.10701	4.00813e-05	0.00471731
AravsEVm005294t1	916.244	3.25881	0.858424	3.79627	0.000146887	0.012523
AravsEVm059172t1	74.6423	3.25852	0.893424	3.64722	0.00026509	0.0189106
AravsEVm007227t3	378.19	3.2518	0.971428	3.34745	0.000815601	0.0414983
AravsEVm021205t1	378.87	3.25129	0.837823	3.88064	0.000104183	0.00978646
AravsEVm021153t4	342.893	3.24336	0.947996	3.42128	0.000623264	0.0341712
AravsEVm017608t1	1903.4	3.21754	0.966473	3.32916	0.000871091	0.0433739
AravsEVm029188t4	64.1838	3.21181	0.875717	3.66763	0.000244806	0.0180151
AravsEVm049034t1	134.088	3.20742	0.944493	3.39592	0.000683987	0.0366699
AravsEVm003705t1	703.082	3.15851	0.774412	4.0786	4.53087e-05	0.00519267
AravsEVm024728t2	446.414	3.13988	0.870635	3.60642	0.00031045	0.0210714
AravsEVm006905t3	244.389	3.12455	0.896963	3.48348	0.000494948	0.0290041
AravsEVm068406t1	1452.23	3.11382	0.853557	3.64805	0.000264237	0.0188769
AravsEVm012308t9	81.7177	3.11102	0.827023	3.7617	0.00016876	0.0138949
AravsEVm010228t1	67.7589	3.1079	0.918624	3.38321	0.00071644	0.0378247
AravsEVm001125t1	394.096	3.04871	0.734731	4.14942	3.33318e-05	0.00404572
AravsEVm061631t1	147.858	3.0163	0.729131	4.13684	3.52116e-05	0.00423691
AravsEVm023329t1	266.085	2.98766	0.910071	3.28289	0.00102749	0.0491139
AravsEVm025846t1	1169.51	2.97642	0.746862	3.98524	6.74132e-05	0.00701318
AravsEVm039011t1	239.079	2.97028	0.81409	3.6486	0.000263677	0.0188722
AravsEVm008605t1	314.765	2.95767	0.793469	3.72752	0.00019337	0.0153619
AravsEVm004180t6	238.444	2.95454	0.81159	3.64044	0.000272175	0.0191653
AravsEVm035517t1	237.141	2.92595	0.865194	3.38184	0.00072002	0.0379612
AravsEVm011594t1	504.052	2.89437	0.703185	4.11609	3.85355e-05	0.00457388
AravsEVm002981t5	296.957	2.87438	0.788728	3.64432	0.000268095	0.0189934
AravsEVm077390t1	135.496	2.81714	0.779644	3.61336	0.000302252	0.0207365
AravsEVm004459t3	278.503	2.8145	0.81441	3.45588	0.000548504	0.0311249
AravsEVm003934t1	401.393	2.79491	0.766839	3.64472	0.000267687	0.0189934
AravsEVm003238t1	113.081	2.79383	0.756581	3.69271	0.00022188	0.0168334
AravsEVm007446t1	880.984	2.78551	0.807993	3.44744	0.000565923	0.0318292
AravsEVm012066t1	150.985	2.75233	0.692988	3.97169	7.13646e-05	0.00733691
AravsEVm019129t2	240.3	2.717	0.696355	3.90174	9.55024e-05	0.00917111
AravsEVm003749t1	221.221	2.71096	0.667506	4.06133	4.87947e-05	0.00551088
AravsEVm008576t2	1616.08	2.69679	0.777461	3.46871	0.000522956	0.0302148
AravsEVm007458t1	184.349	2.69545	0.75597	3.56555	0.000363091	0.0233521
AravsEVm037097t5	81.8955	2.65911	0.688267	3.86349	0.000111778	0.0102686
AravsEVm018423t1	558.297	2.65496	0.750879	3.5358	0.000406536	0.0254076
AravsEVm083261t1	117.599	2.64603	0.756373	3.49831	0.000468209	0.0278337
AravsEVm001757t4	206.857	2.61481	0.728399	3.5898	0.00033093	0.02195
AravsEVm015467t6	632.827	2.58598	0.749094	3.45214	0.000556152	0.031406
AravsEVm010399t1	144.564	2.5763	0.690805	3.72941	0.000191927	0.0153344
AravsEVm004835t1	388.312	2.54505	0.692926	3.6729	0.000239814	0.0177412
AravsEVm008150t1	133.79	2.54384	0.729473	3.48723	0.000488043	0.0286956
AravsEVm007135t1	302.412	2.53873	0.643731	3.94377	8.02107e-05	0.00799933
AravsEVm084684t1	163.132	2.48397	0.742772	3.3442	0.000825217	0.041805
AravsEVm030916t1	513.189	2.47149	0.66895	3.69458	0.000220246	0.0167911
AravsEVm043590t1	137.044	2.39558	0.665317	3.60066	0.000317408	0.0213776
AravsEVm007640t2	528.569	2.38585	0.720067	3.31338	0.000921761	0.0452212
AravsEVm044081t2	197.317	2.37982	0.723683	3.28848	0.0010073	0.0483657
AravsEVm008502t1	404.754	2.36042	0.553726	4.26279	2.01894e-05	0.00271431
AravsEVm025471t1	79.9435	2.21859	0.664614	3.33817	0.000843335	0.0425379
AravsEVm027061t1	462.249	2.17545	0.651588	3.33868	0.000841773	0.0424898
AravsEVm013429t4	93.9512	2.15647	0.573409	3.76078	0.000169383	0.0139149
AravsEVm010639t2	370.945	1.97059	0.593857	3.31828	0.000905726	0.0446486
AravsEVm005051t2	905.141	-1.94373	0.554191	-3.50733	0.000452622	0.0271782
AravsEVm004849t3	1447.13	-1.97108	0.588041	-3.35195	0.000802449	0.0409782
AravsEVm006192t1	393.518	-2.14592	0.602436	-3.56208	0.000367933	0.0235121
AravsEVm004574t4	861.313	-2.19304	0.554683	-3.95369	7.69566e-05	0.00772994
AravsEVm043281t1	12480	-2.20278	0.638279	-3.45112	0.000558261	0.0314996
AravsEVm017226t5	194.951	-2.22543	0.60777	-3.66163	0.000250618	0.018236
AravsEVm023226t1	237.199	-2.2341	0.635771	-3.514	0.000441412	0.026834
AravsEVm023109t1	713.277	-2.32213	0.66588	-3.48731	0.0004879	0.0286956
AravsEVm011695t1	4279.04	-2.39557	0.679081	-3.52767	0.000419237	0.0259541
AravsEVm004574t1	4352.48	-2.44783	0.625137	-3.91567	9.01553e-05	0.00881505
AravsEVm000887t8	2394.99	-2.45546	0.737582	-3.32906	0.000871383	0.0433739
AravsEVm025710t1	914.027	-2.48195	0.686821	-3.61368	0.00030188	0.0207313
AravsEVm014676t1	2471.82	-2.49881	0.719961	-3.47076	0.000518991	0.0300602
AravsEVm044498t1	846.796	-2.60781	0.739492	-3.52649	0.000421108	0.0259838
AravsEVm002243t1	550.598	-2.63029	0.71426	-3.68254	0.000230923	0.0172293
AravsEVm012669t1	690.17	-2.67651	0.732437	-3.65425	0.000257937	0.0186093
AravsEVm024184t2	274.904	-2.70262	0.800669	-3.37545	0.000736955	0.0386211
AravsEVm044808t1	3499.35	-2.72071	0.753322	-3.61162	0.000304286	0.0208262
AravsEVm012529t1	861.744	-2.76207	0.789776	-3.49728	0.00047002	0.0279177
AravsEVm002384t1	1365.24	-2.76478	0.810512	-3.41115	0.000646896	0.035085
AravsEVm005822t3	1863.67	-2.80905	0.722231	-3.8894	0.00010049	0.00953228
AravsEVm049102t2	812.828	-2.8237	0.833923	-3.38604	0.000709096	0.0375837
AravsEVm011642t1	1849.77	-2.83037	0.861013	-3.28725	0.0010117	0.0485104
AravsEVm004135t3	400.57	-2.86417	0.827678	-3.46048	0.000539203	0.0308223
AravsEVm013448t2	187.624	-2.86446	0.83433	-3.43324	0.000596411	0.0330389
AravsEVm007374t1	517.134	-2.91808	0.834535	-3.49666	0.000471126	0.0279596
AravsEVm045339t1	166.08	-3.06352	0.833598	-3.67506	0.000237797	0.0176135
AravsEVm023587t1	75021.1	-3.10897	0.928296	-3.34911	0.000810705	0.0413394
AravsEVm018231t1	1479.56	-3.21101	0.850977	-3.77332	0.000161091	0.0134229
AravsEVm017930t1	128.507	-3.27063	0.900309	-3.63278	0.000280382	0.0196211
AravsEVm022991t1	7461.38	-3.43111	0.826709	-4.15032	3.32006e-05	0.00404364
AravsEVm004767t1	5185.76	-3.4678	0.789773	-4.39089	1.12888e-05	0.00171193
AravsEVm013441t3	1549.58	-3.54832	0.958836	-3.70065	0.000215044	0.0165387
AravsEVm024835t1	4244.33	-3.55336	1.05581	-3.36554	0.000763946	0.0396575
AravsEVm009082t1	742.047	-3.72794	0.972478	-3.83344	0.000126364	0.011126
AravsEVm005911t2	173.259	-3.78582	1.13655	-3.33099	0.00086538	0.0433079
AravsEVm038398t2	285.91	-3.8411	0.951674	-4.03616	5.43341e-05	0.0060004
AravsEVm004116t3	4869.76	-3.84791	1.01451	-3.79288	0.000148911	0.0126647
AravsEVm024450t1	1485.44	-3.86145	0.941325	-4.10215	4.09337e-05	0.00478424
AravsEVm023852t1	99.4856	-3.96734	1.16997	-3.39098	0.000696427	0.03716
AravsEVm018231t3	744.125	-4.00078	1.19479	-3.34852	0.000812454	0.0413683
AravsEVm004116t2	4686.86	-4.21794	0.958985	-4.39834	1.09083e-05	0.00166506
AravsEVm020279t1	1095.71	-4.26738	0.90082	-4.73722	2.16675e-06	0.000421943
AravsEVm009607t1	130.044	-4.30567	1.25993	-3.41738	0.000632268	0.0344788
AravsEVm024450t6	1739.06	-4.34186	0.913281	-4.75413	1.99299e-06	0.000394703
AravsEVm007835t5	268.515	-4.39899	1.21862	-3.60983	0.000306402	0.020939
AravsEVm068956t1	19.2753	-4.42426	1.28655	-3.43885	0.000584186	0.0325422
AravsEVm013425t1	552.172	-4.52718	1.26732	-3.57226	0.000353914	0.0229702
AravsEVm004589t1	304.637	-4.53242	1.21236	-3.73852	0.00018511	0.0148919
AravsEVm002072t2	637.779	-4.53676	1.35112	-3.35778	0.000785712	0.0403298
AravsEVm069164t2	10.1847	-4.54238	1.364	-3.33019	0.000867879	0.0433381
AravsEVm080002t1	15.962	-4.59214	1.2395	-3.70483	0.000211535	0.0163227
AravsEVm029913t2	118.93	-4.63307	1.37867	-3.36055	0.000777886	0.0400752
AravsEVm017685t1	25.2763	-4.63375	1.32244	-3.50394	0.000458437	0.0273692
AravsEVm038674t1	10.488	-4.63715	1.29765	-3.57349	0.000352256	0.0229508
AravsEVm067891t1	34.3619	-4.66727	1.38686	-3.36535	0.000764478	0.0396575
AravsEVm063082t1	29.6532	-4.72547	1.34803	-3.50546	0.000455826	0.0272599
AravsEVm092343t1	13.8277	-4.75972	1.4153	-3.36305	0.000770873	0.0398902
AravsEVm015044t3	177.974	-4.78167	1.4263	-3.3525	0.00080085	0.0409564
AravsEVm049369t1	29.0463	-4.86872	1.44017	-3.38065	0.000723135	0.0380967
AravsEVm022380t1	30.9268	-4.87275	1.32893	-3.66668	0.000245724	0.0180447
AravsEVm032729t3	9.34438	-4.8968	1.33072	-3.67981	0.000233411	0.0173894
AravsEVm012644t3	263.911	-4.96766	1.46608	-3.38839	0.000703035	0.0373758
AravsEVm032065t1	9.54911	-4.97043	1.46922	-3.38304	0.00071689	0.0378247
AravsEVm002967t3	78.2942	-4.99771	1.37896	-3.62427	0.000289782	0.0201179
AravsEVm016373t9	19.9637	-5.03507	1.46305	-3.44148	0.000578542	0.032305
AravsEVm072303t1	330.122	-5.05541	1.52989	-3.30443	0.000951693	0.0462676
AravsEVm013580t3	17.0021	-5.06582	1.45191	-3.48908	0.000484685	0.0285462
AravsEVm025949t4	7.52612	-5.17211	1.33651	-3.86987	0.000108895	0.01011
AravsEVm002988t9	15.4437	-5.18615	1.3042	-3.97648	6.99421e-05	0.00723322
AravsEVm033187t3	22.2083	-5.19206	1.47981	-3.50859	0.00045049	0.027103
AravsEVm045804t1	7.86267	-5.2238	1.46353	-3.56931	0.000357929	0.0231478
AravsEVm080550t2	5.19875	-5.2315	1.53045	-3.41827	0.000630201	0.0344198
AravsEVm054709t1	7.84914	-5.2357	1.41557	-3.69866	0.000216743	0.0166146
AravsEVm002399t1	15.4256	-5.25739	1.45005	-3.62565	0.000288231	0.0200301
AravsEVm002503t3	162.467	-5.25775	1.50575	-3.49177	0.000479834	0.02829
AravsEVm018956t1	19.3675	-5.26103	1.46061	-3.60193	0.000315864	0.0213353
AravsEVm000698t4	11.6556	-5.26174	1.54688	-3.40151	0.000670138	0.0361492
AravsEVm064067t1	27.4092	-5.27659	1.50256	-3.51174	0.000445179	0.0269081
AravsEVm015034t5	46.2928	-5.27667	1.52395	-3.46248	0.000535212	0.0307436
AravsEVm004274t2	35.3361	-5.28119	1.5535	-3.39956	0.000674953	0.0363528
AravsEVm002972t1	28.0184	-5.28341	1.60481	-3.29223	0.000993968	0.0479355
AravsEVm024839t1	11.8536	-5.28812	1.4802	-3.57258	0.000353483	0.0229665
AravsEVm014142t3	467.261	-5.29657	0.89307	-5.93075	3.01554e-09	8.82078e-07
AravsEVm069632t2	22.7247	-5.31435	1.49169	-3.56264	0.000367149	0.0235019
AravsEVm008034t4	18.1184	-5.34527	1.36773	-3.90814	9.30075e-05	0.00901825
AravsEVm025620t6	5.61875	-5.34833	1.60321	-3.33602	0.000849859	0.0427437
AravsEVm011565t2	16.5163	-5.35545	1.46258	-3.66165	0.000250593	0.018236
AravsEVm008980t2	24.9747	-5.39303	1.61732	-3.33454	0.000854394	0.04291
AravsEVm002825t7	17.5144	-5.44391	1.4307	-3.80507	0.000141765	0.0121755
AravsEVm020695t1	48.2676	-5.46712	1.57167	-3.47854	0.00050416	0.0293471
AravsEVm012826t7	9.33342	-5.48935	1.62456	-3.37897	0.000727579	0.0382444
AravsEVm100264t1	9.34716	-5.49066	1.5265	-3.59689	0.000322048	0.0215862
AravsEVm000441t1	143.827	-5.49356	1.63363	-3.3628	0.000771563	0.0398964
AravsEVm015502t1	6.21468	-5.50464	1.58189	-3.47978	0.000501826	0.0292855
AravsEVm032047t3	46.07	-5.51789	1.6826	-3.27938	0.00104034	0.0495435
AravsEVm046068t1	6.32801	-5.52161	1.56637	-3.52509	0.000423332	0.0260063
AravsEVm050046t1	6.4383	-5.54382	1.4927	-3.71395	0.000204048	0.0159372
AravsEVm024600t3	28.1634	-5.54605	1.63929	-3.38321	0.000716437	0.0378247
AravsEVm029041t1	32.2556	-5.55317	1.36374	-4.07202	4.66065e-05	0.00531527
AravsEVm034550t3	10.4427	-5.652	1.46261	-3.86432	0.000111401	0.0102474
AravsEVm018627t3	42.3784	-5.65566	1.62721	-3.47568	0.000509561	0.0295876
AravsEVm058514t1	10.4913	-5.65631	1.48071	-3.81999	0.000133456	0.0116188
AravsEVm027246t3	19.6271	-5.6725	1.45707	-3.89308	9.89802e-05	0.00941456
AravsEVm065960t1	7.0292	-5.6819	1.49489	-3.80087	0.000144191	0.0123232
AravsEVm049178t1	23.1118	-5.68832	1.55343	-3.66179	0.000250459	0.018236
AravsEVm009770t4	24.2189	-5.69871	1.59489	-3.5731	0.000352775	0.0229632
AravsEVm024587t3	24.4153	-5.70285	1.6368	-3.48415	0.000493708	0.02898
AravsEVm058433t1	16.3163	-5.76106	1.5737	-3.66084	0.000251392	0.0182501
AravsEVm072687t2	7.44845	-5.76719	1.42923	-4.03518	5.45602e-05	0.0060004
AravsEVm004270t1	16.4851	-5.77553	1.50588	-3.83532	0.000125403	0.0110921
AravsEVm097307t1	57.8257	-5.79717	1.62345	-3.5709	0.000355752	0.0230497
AravsEVm023641t6	245.65	-5.79777	1.63547	-3.54503	0.00039257	0.0246804
AravsEVm065044t1	11.5263	-5.80282	1.51116	-3.83997	0.000123049	0.0109584
AravsEVm015909t8	96.3346	-5.81264	1.72339	-3.3728	0.000744091	0.0389075
AravsEVm068816t1	5.14821	-5.8325	1.65024	-3.53433	0.000408809	0.0254723
AravsEVm023759t1	5.20908	-5.84305	1.60464	-3.64135	0.000271211	0.0191519
AravsEVm016237t5	5.23142	-5.8476	1.69161	-3.45682	0.000546584	0.0310664
AravsEVm028857t1	12.132	-5.87344	1.42514	-4.1213	3.76736e-05	0.00449448
AravsEVm012566t20	5.29543	-5.87394	1.7319	-3.39161	0.000694827	0.0371088
AravsEVm079665t2	5.3332	-5.8762	1.68148	-3.49466	0.000474663	0.028098
AravsEVm004105t11	5.40702	-5.89635	1.59556	-3.69548	0.000219474	0.0167504
AravsEVm026387t2	5.3717	-5.89694	1.70672	-3.45514	0.000550015	0.0311768
AravsEVm073856t1	5.42899	-5.90451	1.58045	-3.73596	0.000186999	0.014975
AravsEVm084539t1	5.45425	-5.91165	1.70954	-3.45804	0.000544119	0.0309735
AravsEVm012669t3	60.5117	-5.91878	1.54369	-3.83417	0.000125987	0.0111209
AravsEVm024450t3	48.8141	-5.93	1.56573	-3.78738	0.000152242	0.0129009
AravsEVm063231t1	12.7293	-5.94733	1.38601	-4.29097	1.77898e-05	0.0024386
AravsEVm009936t1	24.7945	-5.95231	1.49629	-3.97805	6.94822e-05	0.00720697
AravsEVm083630t1	12.8148	-5.95322	1.39486	-4.26796	1.97271e-05	0.00267272
AravsEVm007788t5	5.59586	-5.95346	1.65017	-3.60778	0.000308825	0.0210177
AravsEVm012382t2	50.0007	-5.96573	1.48103	-4.0281	5.62294e-05	0.00616144
AravsEVm018122t2	5.69158	-5.96856	1.57543	-3.78853	0.000151541	0.0128571
AravsEVm034507t1	5.69423	-5.9785	1.77419	-3.36971	0.000752477	0.0392873
AravsEVm047492t3	5.7123	-5.98136	1.53233	-3.90344	9.48352e-05	0.00914012
AravsEVm057070t1	5.71968	-5.98301	1.6224	-3.68775	0.000226244	0.0170255
AravsEVm051817t2	5.764	-5.99492	1.57197	-3.81364	0.000136933	0.0118772
AravsEVm072073t1	21.4537	-6.00618	1.39113	-4.31748	1.5782e-05	0.0022155
AravsEVm020564t2	8.83506	-6.01057	1.48956	-4.03512	5.45751e-05	0.0060004
AravsEVm075307t1	5.86069	-6.02288	1.6832	-3.57823	0.000345929	0.0226653
AravsEVm016612t4	5.92066	-6.03024	1.53547	-3.92728	8.59113e-05	0.00848313
AravsEVm030482t3	5.98529	-6.05067	1.62393	-3.72593	0.000194594	0.0153971
AravsEVm007023t4	55.4995	-6.05929	1.52018	-3.9859	6.72236e-05	0.00700388
AravsEVm008257t1	46.8109	-6.06487	1.53071	-3.96212	7.42865e-05	0.00754034
AravsEVm019253t5	6.11476	-6.07488	1.57941	-3.84631	0.000119912	0.0107338
AravsEVm006723t3	6.1063	-6.07631	1.61895	-3.75324	0.000174564	0.0142235
AravsEVm014628t2	27.2749	-6.09365	1.445	-4.21707	2.47493e-05	0.00321602
AravsEVm048542t1	9.40033	-6.10215	1.42151	-4.29272	1.76497e-05	0.00242415
AravsEVm069632t3	6.2134	-6.10645	1.6285	-3.74974	0.000177015	0.014373
AravsEVm002173t5	20.7657	-6.11462	1.41702	-4.31511	1.59521e-05	0.00223043
AravsEVm012517t1	6.27754	-6.11909	1.6415	-3.72774	0.000193207	0.0153619
AravsEVm028176t2	6.29335	-6.12068	1.65373	-3.70114	0.000214636	0.0165377
AravsEVm013380t5	6.30682	-6.1241	1.65901	-3.69142	0.000223003	0.016836
AravsEVm075339t1	6.38822	-6.14507	1.68622	-3.64429	0.000268132	0.0189934
AravsEVm011673t8	6.50846	-6.16415	1.55139	-3.9733	7.08824e-05	0.00731625
AravsEVm066656t2	6.55587	-6.18249	1.71538	-3.60416	0.000313163	0.0212144
AravsEVm009819t2	36.6095	-6.19634	1.58628	-3.90621	9.37542e-05	0.00906549
AravsEVm024207t7	6.60415	-6.19649	1.76455	-3.51165	0.000445326	0.0269081
AravsEVm002384t3	6.63477	-6.19688	1.52104	-4.0741	4.61934e-05	0.00527676
AravsEVm005470t2	192.783	-6.19963	1.47994	-4.18912	2.80037e-05	0.0035085
AravsEVm011311t1	22.8396	-6.24708	1.90083	-3.28651	0.00101437	0.0485717
AravsEVm069158t2	6.87936	-6.25222	1.56363	-3.99854	6.37347e-05	0.00674083
AravsEVm017659t2	15.7147	-6.25486	1.52596	-4.09898	4.14974e-05	0.00481784
AravsEVm003544t4	6.9565	-6.26602	1.58361	-3.9568	7.59592e-05	0.00764074
AravsEVm004878t4	6.96838	-6.26923	1.54337	-4.06204	4.86451e-05	0.00550288
AravsEVm036257t1	419.713	-6.2733	1.88975	-3.31965	0.000901311	0.0444676
AravsEVm011569t2	10.5503	-6.27838	1.7815	-3.52421	0.000424747	0.0260703
AravsEVm001957t1	10.6669	-6.29003	1.83239	-3.43269	0.000597629	0.033054
AravsEVm042180t2	7.11625	-6.29544	1.69559	-3.71282	0.00020496	0.0159563
AravsEVm001958t1	39.4225	-6.30465	1.48831	-4.23612	2.2742e-05	0.00298852
AravsEVm015281t9	7.17247	-6.30834	1.57444	-4.00672	6.15677e-05	0.00656127
AravsEVm016751t1	63.7918	-6.32215	1.5738	-4.01712	5.89129e-05	0.00634607
AravsEVm021858t2	7.32349	-6.33453	1.50176	-4.21806	2.46412e-05	0.00320794
AravsEVm020401t1	7.39013	-6.34725	1.5998	-3.96752	7.26251e-05	0.00742284
AravsEVm022053t2	7.37255	-6.34804	1.62424	-3.90832	9.29405e-05	0.00901825
AravsEVm010734t1	7.40953	-6.35425	1.93115	-3.2904	0.00100043	0.048102
AravsEVm007023t3	49.1383	-6.36145	1.54041	-4.1297	3.6323e-05	0.00434819
AravsEVm003445t7	7.49436	-6.36917	1.5759	-4.04162	5.30835e-05	0.00589058
AravsEVm011119t2	209.464	-6.37326	1.86022	-3.42608	0.000612357	0.0336556
AravsEVm036013t2	7.63373	-6.4004	1.53638	-4.1659	3.10123e-05	0.00381702
AravsEVm010907t6	7.65915	-6.40563	1.56785	-4.08561	4.39618e-05	0.00506611
AravsEVm025834t1	7.65599	-6.40784	1.54897	-4.13685	3.5211e-05	0.00423691
AravsEVm048117t2	17.5717	-6.41852	1.39327	-4.6068	4.08908e-06	0.000731119
AravsEVm011334t2	94.5657	-6.43327	1.8509	-3.47574	0.000509437	0.0295876
AravsEVm065927t1	7.88267	-6.44456	1.64548	-3.91652	8.98374e-05	0.00879626
AravsEVm079025t1	7.86041	-6.44535	1.72864	-3.72857	0.000192566	0.0153504
AravsEVm012644t9	18.0543	-6.45044	1.61218	-4.00108	6.30544e-05	0.00667898
AravsEVm076605t1	7.91838	-6.45323	1.62248	-3.9774	6.9673e-05	0.00721606
AravsEVm007745t8	106.115	-6.45346	1.80748	-3.57042	0.000356416	0.0230713
AravsEVm004767t2	188.102	-6.45649	1.39182	-4.63889	3.50281e-06	0.000636056
AravsEVm028593t1	7.95348	-6.45977	1.66203	-3.88668	0.000101626	0.00961394
AravsEVm011334t4	70.4253	-6.4672	1.70786	-3.78671	0.000152652	0.01292
AravsEVm001849t5	18.4034	-6.4726	1.93251	-3.34932	0.0008101	0.0413388
AravsEVm017858t3	42.3813	-6.4727	1.68923	-3.83175	0.000127234	0.0111886
AravsEVm022907t1	8.10288	-6.47867	1.54272	-4.1995	2.675e-05	0.00339421
AravsEVm042095t2	8.08585	-6.48543	1.67052	-3.88228	0.000103482	0.00976307
AravsEVm013282t5	8.13127	-6.4864	1.57457	-4.11948	3.79727e-05	0.00452244
AravsEVm029393t4	8.17503	-6.49142	1.56442	-4.14941	3.33333e-05	0.00404572
AravsEVm005279t8	8.15466	-6.49258	1.94375	-3.34023	0.000837081	0.0422835
AravsEVm026866t2	8.15528	-6.49269	1.97003	-3.29574	0.000981636	0.0473938
AravsEVm048124t2	8.23354	-6.5045	1.72033	-3.78097	0.000156219	0.013095
AravsEVm063087t5	8.21383	-6.50815	1.66046	-3.91948	8.87396e-05	0.00872543
AravsEVm018755t1	8.28308	-6.51025	1.57479	-4.13403	3.56456e-05	0.00427442
AravsEVm057636t2	8.32384	-6.5201	1.9767	-3.29848	0.000972097	0.0470632
AravsEVm016095t6	8.34332	-6.52522	1.9741	-3.30541	0.000948359	0.0461376
AravsEVm022280t1	12.587	-6.53357	1.87018	-3.49355	0.00047665	0.0281441
AravsEVm036010t2	19.1783	-6.53866	1.89538	-3.44979	0.000561029	0.0315793
AravsEVm005678t3	8.47699	-6.5521	1.93567	-3.38492	0.000711985	0.0376797
AravsEVm009046t8	8.53473	-6.55912	1.49705	-4.38138	1.17932e-05	0.00177304
AravsEVm013618t3	8.56206	-6.55942	1.61436	-4.06316	4.84118e-05	0.0054917
AravsEVm017521t3	8.53494	-6.56166	1.79766	-3.65012	0.000262123	0.0188335
AravsEVm012603t3	8.52677	-6.56221	1.54455	-4.24863	2.15081e-05	0.00286377
AravsEVm103773t7	8.57778	-6.56656	1.9627	-3.34568	0.000820797	0.0416717
AravsEVm000775t4	28.4219	-6.56854	1.93571	-3.39334	0.000690447	0.0369188
AravsEVm038717t1	28.409	-6.56939	1.64551	-3.99231	6.54325e-05	0.00687878
AravsEVm000896t3	8.63545	-6.57935	1.95725	-3.36154	0.000775104	0.0400203
AravsEVm024208t6	8.65717	-6.58168	1.47686	-4.45654	8.32943e-06	0.00132948
AravsEVm011481t1	179.049	-6.58356	1.68177	-3.91466	9.05322e-05	0.00883953
AravsEVm003930t3	8.72707	-6.58921	1.96011	-3.36165	0.000774782	0.0400203
AravsEVm009982t4	8.74691	-6.59625	1.93295	-3.41253	0.000643639	0.0349626
AravsEVm011209t1	8.74333	-6.59764	1.5239	-4.32945	1.49481e-05	0.00213269
AravsEVm064405t2	8.80024	-6.59906	1.65142	-3.99598	6.44258e-05	0.00679338
AravsEVm058712t1	8.79322	-6.60695	1.54358	-4.28028	1.86655e-05	0.00254367
AravsEVm040684t2	8.81571	-6.60712	1.63152	-4.04968	5.12871e-05	0.00573676
AravsEVm004490t4	8.81614	-6.60839	1.96782	-3.35824	0.000784418	0.0403225
AravsEVm013698t3	8.80655	-6.60874	1.57455	-4.19723	2.70203e-05	0.00342115
AravsEVm013327t1	1471.04	-6.60919	1.51482	-4.36303	1.28271e-05	0.00189585
AravsEVm008215t1	48.6746	-6.61352	1.52634	-4.33293	1.47136e-05	0.00211217
AravsEVm010270t2	29.2897	-6.61362	1.48122	-4.46498	8.0076e-06	0.0012875
AravsEVm040063t1	8.8493	-6.61539	1.61925	-4.08547	4.3987e-05	0.00506611
AravsEVm009891t2	8.87332	-6.61866	1.49399	-4.43021	9.41434e-06	0.00147239
AravsEVm002286t4	8.9558	-6.62967	1.98403	-3.34152	0.000833218	0.0421493
AravsEVm012403t1	8.98724	-6.63226	1.52678	-4.34396	1.39939e-05	0.00204025
AravsEVm007431t1	9.03428	-6.63701	1.73059	-3.83512	0.000125502	0.0110921
AravsEVm065888t1	33.8895	-6.64306	1.58675	-4.18659	2.83177e-05	0.00352886
AravsEVm070295t1	9.02274	-6.64363	1.51425	-4.3874	1.14716e-05	0.00173214
AravsEVm028199t1	9.04351	-6.64477	1.97426	-3.36571	0.000763464	0.0396575
AravsEVm067699t1	9.05522	-6.64695	1.73992	-3.82026	0.000133311	0.0116188
AravsEVm020145t7	9.06805	-6.64871	1.74244	-3.81574	0.000135773	0.0117912
AravsEVm068939t2	9.06809	-6.65088	1.9881	-3.34535	0.000821793	0.041692
AravsEVm010345t3	9.13323	-6.65912	1.97831	-3.36607	0.000762465	0.0396575
AravsEVm025620t10	9.14397	-6.65916	1.58986	-4.18851	2.80793e-05	0.00351167
AravsEVm007639t3	9.14971	-6.6618	1.92875	-3.45394	0.000552459	0.0312479
AravsEVm035500t1	9.26104	-6.67718	1.98967	-3.35592	0.000791006	0.0405419
AravsEVm069158t3	9.25618	-6.67932	1.52076	-4.39208	1.1227e-05	0.00170626
AravsEVm002473t2	21.2041	-6.68036	1.90378	-3.50901	0.000449786	0.027084
AravsEVm037412t1	9.29315	-6.68509	1.47499	-4.53229	5.83486e-06	0.000987689
AravsEVm031637t1	9.28811	-6.68696	1.68308	-3.97306	7.09543e-05	0.00731625
AravsEVm013993t1	14.0026	-6.68766	1.78167	-3.75359	0.000174318	0.01422
AravsEVm033161t3	9.35573	-6.6929	1.76301	-3.79629	0.000146875	0.012523
AravsEVm019014t1	9.37337	-6.69349	1.4677	-4.56052	5.10261e-06	0.000880798
AravsEVm002096t2	9.4007	-6.69653	1.58119	-4.23511	2.28439e-05	0.00299628
AravsEVm074810t1	9.43404	-6.70004	2.00202	-3.34663	0.000817988	0.0415593
AravsEVm071215t1	9.41982	-6.70385	1.55231	-4.31863	1.57002e-05	0.00220846
AravsEVm020093t1	9.45913	-6.70438	1.67052	-4.01336	5.98608e-05	0.00642837
AravsEVm071215t2	9.44139	-6.70938	1.5938	-4.20968	2.55731e-05	0.0032804
AravsEVm018015t4	9.4844	-6.71224	1.95636	-3.43098	0.000601406	0.0331841
AravsEVm010241t4	9.47251	-6.71446	1.67111	-4.01796	5.87042e-05	0.00634314
AravsEVm036621t2	9.56143	-6.72345	1.9444	-3.45785	0.000544506	0.0309735
AravsEVm076358t1	61.72	-6.7236	1.57823	-4.26022	2.04222e-05	0.00273508
AravsEVm001983t8	9.6142	-6.72822	2.04449	-3.2909	0.00099866	0.0480829
AravsEVm012620t2	9.65428	-6.7355	2.04354	-3.296	0.000980712	0.0473819
AravsEVm014017t1	9.66518	-6.74056	1.97579	-3.41158	0.000645866	0.0350563
AravsEVm025573t2	9.69189	-6.74088	1.52642	-4.41614	1.00481e-05	0.00155757
AravsEVm008506t1	9.69262	-6.74375	1.95996	-3.44077	0.000580061	0.032364
AravsEVm022052t10	9.78013	-6.75698	1.55802	-4.33691	1.44498e-05	0.00208285
AravsEVm074443t1	9.75372	-6.7571	1.69464	-3.98734	6.68194e-05	0.00698594
AravsEVm006354t1	9.83915	-6.76541	2.00862	-3.36819	0.000756632	0.0394748
AravsEVm013243t2	9.87856	-6.76739	1.98115	-3.4159	0.000635723	0.0346132
AravsEVm071348t1	9.82276	-6.7676	1.73473	-3.90123	9.57042e-05	0.00917789
AravsEVm062284t1	32.8392	-6.78089	1.65314	-4.10182	4.09921e-05	0.00478424
AravsEVm013969t2	9.94908	-6.78104	1.90847	-3.55314	0.000380668	0.0240846
AravsEVm050836t1	9.99268	-6.7874	1.68662	-4.02425	5.71567e-05	0.00622403
AravsEVm021251t1	10.0308	-6.79035	2.05119	-3.31045	0.000931477	0.0455382
AravsEVm006152t2	10.0497	-6.79703	1.9355	-3.51176	0.000445143	0.0269081
AravsEVm069770t1	15.2915	-6.81052	1.42303	-4.78593	1.70197e-06	0.000342896
AravsEVm006017t2	10.2063	-6.81882	1.91088	-3.56842	0.000359134	0.0232043
AravsEVm004213t1	10.2064	-6.81906	1.72762	-3.94707	7.91124e-05	0.00790107
AravsEVm009366t6	10.2606	-6.82572	2.03213	-3.3589	0.000782531	0.0402551
AravsEVm001236t1	10.3393	-6.83672	1.93937	-3.52523	0.000423123	0.0260063
AravsEVm023808t1	10.3475	-6.83955	1.68342	-4.0629	4.84677e-05	0.0054917
AravsEVm010555t5	10.3909	-6.84383	2.07015	-3.30596	0.000946505	0.046137
AravsEVm033165t1	15.6387	-6.8504	1.51607	-4.51853	6.22717e-06	0.00104649
AravsEVm071185t1	10.454	-6.85609	1.6326	-4.19949	2.67516e-05	0.00339421
AravsEVm016985t2	10.518	-6.8577	2.02308	-3.38973	0.000699625	0.0372512
AravsEVm007127t4	10.4964	-6.85883	2.0068	-3.41779	0.000631316	0.0344538
AravsEVm004401t5	10.4809	-6.85971	1.55672	-4.40652	1.05044e-05	0.00161754
AravsEVm033143t1	23.9176	-6.86445	1.46022	-4.70096	2.58936e-06	0.000491908
AravsEVm048069t2	10.5813	-6.86456	1.53027	-4.48584	7.26256e-06	0.00118905
AravsEVm063972t1	10.5749	-6.87087	1.62186	-4.23641	2.27117e-05	0.00298852
AravsEVm063164t2	10.6058	-6.8755	2.06845	-3.32398	0.000887429	0.0440001
AravsEVm069110t1	10.675	-6.87838	1.54415	-4.45449	8.40948e-06	0.00133615
AravsEVm060768t1	10.709	-6.8822	1.58732	-4.33575	1.45266e-05	0.00208962
AravsEVm064000t2	10.6725	-6.88476	2.01682	-3.41367	0.000640947	0.0348705
AravsEVm009270t6	10.755	-6.89153	1.58667	-4.34338	1.40306e-05	0.00204025
AravsEVm078491t2	10.749	-6.89408	1.766	-3.90379	9.46972e-05	0.00914012
AravsEVm072303t2	94.753	-6.90082	1.72945	-3.99018	6.60222e-05	0.0069209
AravsEVm007250t4	10.7973	-6.90314	1.55859	-4.42909	9.46307e-06	0.0014767
AravsEVm004529t4	10.8415	-6.90333	1.94302	-3.55289	0.000381026	0.0240846
AravsEVm004590t5	10.8118	-6.9036	2.08058	-3.31812	0.000906257	0.0446486
AravsEVm015136t1	10.8258	-6.90536	1.66664	-4.14328	3.42375e-05	0.00413393
AravsEVm040002t3	10.911	-6.91628	1.99618	-3.46476	0.000530699	0.0305359
AravsEVm016241t6	10.9278	-6.91844	2.04047	-3.39061	0.000697382	0.03716
AravsEVm032699t2	10.9585	-6.92113	2.01458	-3.43553	0.000591407	0.0328137
AravsEVm004743t3	11.0414	-6.9292	1.97572	-3.50717	0.000452905	0.0271782
AravsEVm014513t3	11.0507	-6.9325	1.98069	-3.50004	0.000465196	0.0277018
AravsEVm001175t4	16.641	-6.93311	1.80659	-3.83769	0.0001242	0.0110328
AravsEVm024752t6	11.0539	-6.93429	1.89371	-3.66175	0.000250503	0.018236
AravsEVm003915t4	11.0539	-6.93548	2.00738	-3.45499	0.00055031	0.0311768
AravsEVm016917t1	11.0913	-6.93952	1.97746	-3.50931	0.000449271	0.0270763
AravsEVm041495t1	11.1774	-6.9461	1.96518	-3.53459	0.000408403	0.0254697
AravsEVm064918t1	11.1925	-6.94941	1.72226	-4.03506	5.45881e-05	0.0060004
AravsEVm009860t3	11.1715	-6.95031	2.06209	-3.37051	0.000750291	0.0392024
AravsEVm073245t1	11.2438	-6.95608	2.03397	-3.41996	0.000626315	0.0342879
AravsEVm009113t5	11.3644	-6.97539	1.50895	-4.62269	3.78798e-06	0.000680766
AravsEVm003910t4	37.8611	-6.98537	1.862	-3.75153	0.000175756	0.0142873
AravsEVm005671t5	11.4599	-6.98669	1.94484	-3.59242	0.000327624	0.021828
AravsEVm001313t1	11.6014	-7.00362	1.99393	-3.51248	0.000443947	0.026904
AravsEVm016020t1	11.6538	-7.01036	1.99859	-3.50766	0.000452073	0.0271749
AravsEVm012634t12	11.6632	-7.01136	1.95121	-3.59335	0.000326458	0.0217774
AravsEVm005391t3	11.6745	-7.0127	1.95387	-3.58913	0.000331787	0.0219652
AravsEVm013123t5	11.6939	-7.01415	1.93264	-3.62931	0.000284175	0.0198073
AravsEVm012811t2	11.7192	-7.01861	1.92256	-3.65067	0.000261561	0.0188125
AravsEVm015685t7	11.7603	-7.02167	1.95795	-3.58623	0.000335491	0.0221894
AravsEVm077246t1	11.7548	-7.02373	1.63033	-4.30817	1.64611e-05	0.00229242
AravsEVm003947t4	11.772	-7.02411	2.0794	-3.37795	0.000730296	0.0383584
AravsEVm018342t7	11.8018	-7.02826	1.94975	-3.6047	0.000312515	0.021191
AravsEVm003010t2	11.8173	-7.02958	1.67496	-4.19688	2.70619e-05	0.00342115
AravsEVm081014t1	11.8871	-7.03603	1.74498	-4.03216	5.52662e-05	0.0060654
AravsEVm003169t8	11.9722	-7.04994	1.60268	-4.39885	1.08824e-05	0.00166474
AravsEVm003937t3	12.0144	-7.05307	1.48209	-4.75888	1.94666e-06	0.000387723
AravsEVm012306t3	39.798	-7.05856	1.93494	-3.64794	0.000264347	0.0188769
AravsEVm019369t9	12.085	-7.05991	2.04849	-3.44639	0.000568122	0.0319015
AravsEVm012158t5	12.0965	-7.06311	1.50394	-4.6964	2.64789e-06	0.000501664
AravsEVm034047t2	12.1275	-7.06481	2.00055	-3.53143	0.000413324	0.0256849
AravsEVm012346t6	12.2803	-7.0829	2.00902	-3.52555	0.000422611	0.0260063
AravsEVm000809t2	12.2898	-7.08345	2.01646	-3.51282	0.000443378	0.026904
AravsEVm001099t6	12.2779	-7.08385	1.93036	-3.66971	0.000242827	0.0179098
AravsEVm048636t1	12.2992	-7.08395	1.9791	-3.57938	0.000344412	0.0225871
AravsEVm006741t5	12.2648	-7.08431	1.89978	-3.72901	0.000192235	0.0153415
AravsEVm024450t7	12.3289	-7.09354	1.62582	-4.36304	1.28265e-05	0.00189585
AravsEVm000152t1	12.4173	-7.09827	1.971	-3.60136	0.000316556	0.0213408
AravsEVm005825t5	12.4101	-7.0984	1.96723	-3.60833	0.000308176	0.0209986
AravsEVm003556t4	12.4278	-7.1027	1.94639	-3.64916	0.0002631	0.0188722
AravsEVm021669t2	12.4379	-7.10273	1.62823	-4.36223	1.28744e-05	0.00189884
AravsEVm005187t7	12.4569	-7.10329	2.01027	-3.5335	0.000410096	0.0255297
AravsEVm001005t9	12.6943	-7.13269	1.93472	-3.68668	0.000227198	0.0170606
AravsEVm000574t4	12.7142	-7.13319	1.43195	-4.98145	6.31092e-07	0.000140957
AravsEVm057009t4	12.8036	-7.14676	2.08903	-3.4211	0.000623694	0.0341712
AravsEVm011036t2	12.8302	-7.14718	2.03352	-3.51468	0.000440281	0.0267885
AravsEVm012701t1	12.8553	-7.15071	1.99872	-3.57765	0.000346694	0.0226942
AravsEVm022734t2	12.8826	-7.15579	1.79468	-3.98722	6.68515e-05	0.00698594
AravsEVm019696t1	78.1897	-7.15847	1.74882	-4.09331	4.25265e-05	0.00492042
AravsEVm028012t3	12.9932	-7.1646	1.97308	-3.63117	0.000282136	0.0197005
AravsEVm012061t5	12.9688	-7.16528	2.15629	-3.32297	0.000890639	0.0440842
AravsEVm006847t2	13.0015	-7.16657	2.05838	-3.48165	0.00049833	0.0291777
AravsEVm003967t3	13.0441	-7.17053	2.07015	-3.46377	0.000532659	0.0306235
AravsEVm005749t4	13.0429	-7.17437	1.59637	-4.49417	6.98408e-06	0.00115155
AravsEVm001422t4	13.1309	-7.17682	1.58995	-4.51387	6.36565e-06	0.00105958
AravsEVm003194t3	13.2061	-7.18834	2.08114	-3.45404	0.000552246	0.0312479
AravsEVm014748t2	13.2429	-7.19172	1.98452	-3.6239	0.000290189	0.0201261
AravsEVm003121t2	13.2269	-7.19183	1.71444	-4.19486	2.73034e-05	0.0034269
AravsEVm079351t1	13.2466	-7.19245	1.54799	-4.6463	3.37935e-06	0.000621592
AravsEVm062359t1	13.2345	-7.19328	1.72515	-4.16966	3.0506e-05	0.00376797
AravsEVm004650t4	13.354	-7.20454	2.07067	-3.47932	0.000502683	0.0292855
AravsEVm022198t2	13.3578	-7.20474	1.95393	-3.6873	0.000226644	0.0170373
AravsEVm005901t4	13.3573	-7.20624	1.95105	-3.69353	0.000221163	0.0168181
AravsEVm007231t2	13.4339	-7.21071	2.04951	-3.51827	0.000434375	0.0264753
AravsEVm063087t6	13.4313	-7.21544	1.47588	-4.88889	1.01404e-06	0.000214824
AravsEVm000569t4	13.4472	-7.21636	1.95221	-3.6965	0.000218589	0.0167012
AravsEVm012214t4	13.5441	-7.2261	1.9605	-3.68585	0.000227937	0.0170977
AravsEVm008863t1	13.5688	-7.22678	2.02315	-3.57205	0.000354197	0.0229702
AravsEVm008286t6	13.5891	-7.23212	1.58839	-4.55311	5.28574e-06	0.000907927
AravsEVm017049t4	31.0346	-7.23532	1.91488	-3.77847	0.000157796	0.0131956
AravsEVm004372t3	13.6746	-7.23761	2.00218	-3.61486	0.000300509	0.0206778
AravsEVm000816t4	13.6877	-7.24131	1.97328	-3.66967	0.000242862	0.0179098
AravsEVm006982t2	13.7142	-7.24573	1.98844	-3.64393	0.000268508	0.0189994
AravsEVm007024t4	13.7716	-7.24897	2.02747	-3.57539	0.000349713	0.0228532
AravsEVm013710t1	13.7873	-7.25151	1.65436	-4.38326	1.16915e-05	0.00176153
AravsEVm002720t8	13.821	-7.25527	2.01011	-3.60939	0.000306914	0.0209535
AravsEVm045376t5	13.8936	-7.26297	1.62174	-4.4785	7.51707e-06	0.00122337
AravsEVm003095t4	13.9226	-7.26365	2.01799	-3.59944	0.000318902	0.0214369
AravsEVm003049t8	13.9588	-7.26963	1.72912	-4.20424	2.61957e-05	0.00334186
AravsEVm002727t5	14.0301	-7.27884	2.05296	-3.54553	0.000391828	0.0246781
AravsEVm019858t1	14.1329	-7.2888	1.99021	-3.66233	0.000249934	0.018236
AravsEVm003891t1	14.2716	-7.30379	1.54555	-4.72568	2.29347e-06	0.000439279
AravsEVm013379t4	14.3797	-7.31242	1.98072	-3.69179	0.000222679	0.016836
AravsEVm007807t8	14.4045	-7.31333	1.64357	-4.44965	8.60087e-06	0.00135076
AravsEVm044514t2	14.3969	-7.31347	2.1937	-3.33384	0.000856551	0.0429874
AravsEVm004541t1	395.906	-7.32373	2.03009	-3.60759	0.000309058	0.0210177
AravsEVm002150t5	14.5224	-7.32793	2.10591	-3.4797	0.000501971	0.0292855
AravsEVm010689t9	14.6046	-7.33477	1.91162	-3.83695	0.000124572	0.0110518
AravsEVm006274t5	14.6744	-7.34006	1.50034	-4.89226	9.96869e-07	0.000211827
AravsEVm031109t1	14.7187	-7.34702	1.72992	-4.24702	2.16631e-05	0.00287376
AravsEVm032078t1	14.7734	-7.35019	2.15531	-3.41026	0.000648998	0.0351717
AravsEVm000373t3	14.8012	-7.354	1.98445	-3.70581	0.000210718	0.0162957
AravsEVm010212t1	14.7793	-7.35438	1.58381	-4.64347	3.42609e-06	0.000623745
AravsEVm039726t1	14.9168	-7.36373	2.01827	-3.64853	0.000263741	0.0188722
AravsEVm004490t2	14.9313	-7.36554	1.65419	-4.45266	8.48147e-06	0.00134231
AravsEVm047655t2	14.9413	-7.3663	1.97669	-3.72659	0.000194087	0.0153839
AravsEVm016249t5	14.9136	-7.36705	2.04636	-3.60008	0.000318125	0.0214053
AravsEVm006020t2	14.9759	-7.3683	1.99214	-3.69869	0.000216718	0.0166146
AravsEVm011833t2	15.0337	-7.3757	1.48483	-4.96738	6.78639e-07	0.000150615
AravsEVm013482t1	15.0453	-7.37687	1.61674	-4.5628	5.04758e-06	0.000874708
AravsEVm007062t4	22.5517	-7.37698	1.90763	-3.86709	0.000110141	0.0101583
AravsEVm010237t4	15.1021	-7.38309	1.98738	-3.71499	0.00020321	0.0159118
AravsEVm036010t1	15.1303	-7.38791	1.81741	-4.06507	4.80185e-05	0.00545849
AravsEVm007630t2	15.2023	-7.39198	1.45445	-5.08231	3.72864e-07	8.7473e-05
AravsEVm017278t2	15.246	-7.39615	1.65715	-4.46319	8.0749e-06	0.00129476
AravsEVm059953t1	15.3107	-7.40341	1.59064	-4.65436	3.24984e-06	0.000601048
AravsEVm003977t2	15.4284	-7.41471	1.9308	-3.84022	0.000122923	0.0109584
AravsEVm008487t4	15.4436	-7.41529	1.4868	-4.98742	6.11897e-07	0.000137549
AravsEVm006707t1	15.5223	-7.42278	1.97285	-3.76246	0.000168247	0.013874
AravsEVm000460t2	15.5231	-7.42407	1.90483	-3.8975	9.71926e-05	0.00926976
AravsEVm011997t1	15.8688	-7.45522	1.92253	-3.87781	0.000105403	0.00986442
AravsEVm017151t2	15.8679	-7.45607	1.9385	-3.84631	0.000119908	0.0107338
AravsEVm068131t1	15.8824	-7.45764	1.64066	-4.54552	5.47987e-06	0.000934385
AravsEVm054718t1	15.9464	-7.45851	1.49815	-4.97847	6.40897e-07	0.000142691
AravsEVm005798t2	15.9967	-7.46726	2.01798	-3.70037	0.000215288	0.0165394
AravsEVm002024t4	16.0772	-7.47333	2.07398	-3.60337	0.000314117	0.0212432
AravsEVm063074t2	16.1157	-7.47922	1.51582	-4.9341	8.05213e-07	0.000175366
AravsEVm004372t2	16.1946	-7.4829	2.11479	-3.53837	0.0004026	0.0252527
AravsEVm002491t2	24.4572	-7.49688	1.67908	-4.46488	8.01119e-06	0.0012875
AravsEVm001200t1	16.3773	-7.49932	2.03049	-3.69335	0.000221323	0.0168181
AravsEVm014542t3	16.5003	-7.51251	2.01761	-3.72347	0.0001965	0.0155049
AravsEVm026584t4	72.666	-7.51999	1.73788	-4.32709	1.51089e-05	0.00215125
AravsEVm027041t3	16.6982	-7.52778	1.43512	-5.2454	1.55943e-07	3.86596e-05
AravsEVm007081t3	16.7982	-7.53557	1.58558	-4.75255	2.00867e-06	0.000396685
AravsEVm017836t4	70.8804	-7.54401	1.47429	-5.11706	3.10341e-07	7.35456e-05
AravsEVm004786t3	73.9187	-7.54541	1.39694	-5.40139	6.61267e-08	1.73794e-05
AravsEVm006928t2	17.1245	-7.56216	1.98498	-3.80968	0.000139145	0.0120094
AravsEVm000805t5	17.1459	-7.56559	2.1222	-3.56498	0.000363884	0.0233601
AravsEVm002059t2	17.1694	-7.56898	2.0315	-3.7258	0.000194694	0.0153971
AravsEVm040002t8	17.17	-7.56975	2.00069	-3.78357	0.000154596	0.0130058
AravsEVm007422t2	17.2529	-7.57457	1.43676	-5.27197	1.34968e-07	3.36986e-05
AravsEVm002834t2	217.929	-7.58359	1.65987	-4.56879	4.90558e-06	0.000855235
AravsEVm019544t3	17.3755	-7.58554	1.93625	-3.91766	8.94139e-05	0.00877939
AravsEVm019915t1	17.4063	-7.5859	2.01451	-3.76562	0.000166134	0.0137775
AravsEVm012306t5	17.436	-7.59261	1.56493	-4.85174	1.22384e-06	0.000253133
AravsEVm000665t4	17.4948	-7.5952	1.97253	-3.85048	0.000117887	0.0106617
AravsEVm005389t4	17.4947	-7.59676	2.04327	-3.71794	0.000200854	0.0157595
AravsEVm001853t2	17.6227	-7.60639	2.05277	-3.70542	0.000211039	0.0163024
AravsEVm001923t8	17.7206	-7.61144	1.98545	-3.83361	0.000126275	0.011126
AravsEVm067451t2	17.795	-7.62126	2.1177	-3.59884	0.000319642	0.021466
AravsEVm003884t1	17.8875	-7.6264	1.97901	-3.85364	0.000116375	0.010566
AravsEVm017375t7	17.9636	-7.63228	1.71415	-4.45253	8.48661e-06	0.00134231
AravsEVm012654t5	17.9754	-7.63287	2.01704	-3.7842	0.000154206	0.0130058
AravsEVm020148t1	18.0111	-7.63627	1.93658	-3.94318	8.04075e-05	0.00800753
AravsEVm008292t3	18.0983	-7.64301	2.09639	-3.6458	0.000266558	0.0189806
AravsEVm004407t4	18.1414	-7.64677	1.98175	-3.85859	0.000114045	0.0104298
AravsEVm004596t3	18.1967	-7.65242	2.00731	-3.81227	0.000137697	0.0119286
AravsEVm004064t5	18.2808	-7.6608	1.47355	-5.19888	2.0049e-07	4.84993e-05
AravsEVm003325t2	18.3128	-7.66107	1.95609	-3.91653	8.98327e-05	0.00879626
AravsEVm003378t2	18.4037	-7.66785	1.98193	-3.86888	0.000109337	0.0101108
AravsEVm009536t3	18.5866	-7.68228	2.0294	-3.78549	0.000153406	0.0129681
AravsEVm002510t1	18.631	-7.68544	1.94173	-3.95804	7.55674e-05	0.00762326
AravsEVm014986t1	18.6696	-7.68601	1.80362	-4.26143	2.03121e-05	0.00272557
AravsEVm011676t2	18.945	-7.70941	2.07792	-3.71016	0.000207126	0.016107
AravsEVm010746t2	19.0503	-7.7185	2.02104	-3.81908	0.000133949	0.0116472
AravsEVm026084t1	19.0916	-7.72268	1.95483	-3.95056	7.79699e-05	0.00780928
AravsEVm000438t6	19.1712	-7.72763	1.5747	-4.90735	9.23135e-07	0.000197964
AravsEVm003619t3	19.359	-7.74244	1.99527	-3.88039	0.00010429	0.00978646
AravsEVm003273t4	19.3578	-7.74311	1.55982	-4.96411	6.90152e-07	0.000152685
AravsEVm032047t1	19.4252	-7.74486	2.09267	-3.70095	0.000214793	0.0165377
AravsEVm010138t2	19.4671	-7.75088	1.58417	-4.8927	9.94623e-07	0.000211827
AravsEVm025461t2	20.0666	-7.79395	1.45548	-5.35492	8.55956e-08	2.21629e-05
AravsEVm019415t1	20.2213	-7.80511	1.57827	-4.94536	7.60038e-07	0.000166565
AravsEVm016426t1	20.2381	-7.80618	2.11965	-3.68277	0.000230711	0.0172293
AravsEVm010872t2	20.2523	-7.80747	2.05232	-3.80422	0.000142249	0.012202
AravsEVm007992t4	20.3004	-7.80802	2.12025	-3.68259	0.000230873	0.0172293
AravsEVm058494t1	20.3643	-7.8157	1.99213	-3.92328	8.73498e-05	0.00861302
AravsEVm007184t2	20.5108	-7.82188	1.52679	-5.12308	3.00589e-07	7.14769e-05
AravsEVm000436t8	20.5808	-7.8289	1.9545	-4.00559	6.18639e-05	0.0065828
AravsEVm027727t2	20.8701	-7.84998	1.96734	-3.99015	6.60312e-05	0.0069209
AravsEVm015040t3	20.9014	-7.85151	2.1436	-3.66277	0.000249505	0.018236
AravsEVm018627t2	21.0096	-7.85711	1.54623	-5.08147	3.74521e-07	8.75677e-05
AravsEVm004175t8	21.0712	-7.86479	2.11795	-3.71341	0.000204487	0.0159372
AravsEVm004060t2	31.6968	-7.87181	1.80287	-4.36626	1.26391e-05	0.001884
AravsEVm001770t3	21.1962	-7.87301	2.04287	-3.8539	0.000116253	0.010566
AravsEVm000659t7	21.2746	-7.87579	1.45312	-5.41994	5.96204e-08	1.57285e-05
AravsEVm015664t1	21.2563	-7.87709	1.55611	-5.06203	4.1481e-07	9.66226e-05
AravsEVm007155t3	21.341	-7.8823	2.02391	-3.89459	9.83639e-05	0.0093687
AravsEVm001093t2	21.6199	-7.89936	2.06678	-3.82206	0.00013234	0.0115794
AravsEVm044039t1	21.7132	-7.90438	1.66367	-4.75116	2.02256e-06	0.000398302
AravsEVm022993t1	21.7641	-7.90727	1.80497	-4.38083	1.18226e-05	0.00177364
AravsEVm005904t2	21.7998	-7.91358	1.99691	-3.96291	7.40402e-05	0.00753443
AravsEVm020286t1	21.9246	-7.91924	1.60825	-4.92413	8.47349e-07	0.0001834
AravsEVm007360t2	21.9706	-7.92223	1.43254	-5.53019	3.19885e-08	8.63442e-06
AravsEVm002715t2	21.9671	-7.92223	1.97819	-4.00478	6.20752e-05	0.00658525
AravsEVm003453t6	22.0229	-7.92558	1.97709	-4.00871	6.10523e-05	0.00652625
AravsEVm005447t9	22.0419	-7.92757	1.99593	-3.97187	7.13111e-05	0.00733691
AravsEVm002253t4	22.2522	-7.94055	2.03453	-3.9029	9.50489e-05	0.00914012
AravsEVm013063t2	22.3505	-7.94628	1.49603	-5.31159	1.08671e-07	2.78285e-05
AravsEVm012777t3	22.5868	-7.96499	1.54653	-5.15025	2.60145e-07	6.22835e-05
AravsEVm048074t2	22.7044	-7.97116	1.99386	-3.99785	6.39203e-05	0.00675026
AravsEVm002127t10	174.092	-7.97593	2.01531	-3.95766	7.56872e-05	0.00762434
AravsEVm013438t6	34.3246	-7.98639	1.67452	-4.76935	1.84818e-06	0.000370048
AravsEVm004895t2	23.438	-8.01808	1.99169	-4.02578	5.67874e-05	0.00620815
AravsEVm015762t1	23.9284	-8.04759	2.00699	-4.00978	6.07765e-05	0.00650671
AravsEVm001990t4	23.951	-8.0483	1.65838	-4.85311	1.2154e-06	0.000252132
AravsEVm009332t4	23.9921	-8.05084	2.00861	-4.00816	6.11944e-05	0.00653145
AravsEVm003038t5	24.2385	-8.06605	2.00388	-4.02522	5.69221e-05	0.00620815
AravsEVm038710t10	24.3847	-8.07584	1.94347	-4.15536	3.24772e-05	0.00397235
AravsEVm014527t3	24.54	-8.0834	1.99432	-4.05322	5.05181e-05	0.0056689
AravsEVm017684t2	24.5766	-8.08619	2.43351	-3.32285	0.000891017	0.0440842
AravsEVm004114t3	24.7459	-8.09373	2.04292	-3.96184	7.43734e-05	0.00754034
AravsEVm005127t2	24.8034	-8.09881	1.46793	-5.51717	3.44503e-08	9.26316e-06
AravsEVm013448t3	24.8082	-8.09993	1.54941	-5.22775	1.71585e-07	4.20895e-05
AravsEVm072310t1	25.0522	-8.11291	1.42021	-5.71248	1.11339e-08	3.12598e-06
AravsEVm014002t2	25.074	-8.11445	2.01579	-4.02545	5.68666e-05	0.00620815
AravsEVm017773t2	25.2772	-8.12619	2.10998	-3.85131	0.000117487	0.0106531
AravsEVm001099t5	25.3168	-8.1291	1.93724	-4.19624	2.71387e-05	0.00342282
AravsEVm005749t6	25.3668	-8.1308	2.4793	-3.27947	0.00104002	0.0495435
AravsEVm001329t5	25.5617	-8.14284	2.44575	-3.32938	0.000870388	0.0433739
AravsEVm014087t5	25.9852	-8.16458	2.49055	-3.27822	0.00104463	0.0497142
AravsEVm007673t7	26.1241	-8.17329	2.44506	-3.34278	0.000829434	0.0419882
AravsEVm006506t3	26.1362	-8.17533	2.078	-3.93424	8.34611e-05	0.00827626
AravsEVm003718t2	26.2186	-8.17767	1.96222	-4.16756	3.07874e-05	0.00379603
AravsEVm047092t1	269.02	-8.17945	2.22569	-3.67501	0.000237837	0.0176135
AravsEVm021416t2	26.4491	-8.19251	1.43761	-5.69872	1.20711e-08	3.37556e-06
AravsEVm001530t6	26.6008	-8.19841	2.02946	-4.0397	5.35207e-05	0.00592969
AravsEVm014481t1	26.5717	-8.19854	2.42778	-3.37697	0.000732882	0.0384364
AravsEVm000809t6	26.8013	-8.21093	2.45185	-3.34887	0.000811411	0.0413453
AravsEVm018239t1	26.8317	-8.21343	1.53086	-5.36523	8.08449e-08	2.10891e-05
AravsEVm012817t6	27.166	-8.23012	2.46682	-3.33633	0.000848934	0.0427313
AravsEVm036343t2	27.1759	-8.23042	2.03215	-4.0501	5.1196e-05	0.00573576
AravsEVm001184t3	27.1836	-8.23109	2.5003	-3.29204	0.000994637	0.0479355
AravsEVm000417t1	27.2035	-8.23268	1.94886	-4.22435	2.39635e-05	0.0031326
AravsEVm050774t1	298.81	-8.24252	2.23675	-3.68505	0.00022866	0.0171255
AravsEVm010117t3	27.5307	-8.24859	2.1647	-3.81049	0.000138689	0.0119848
AravsEVm001818t1	27.5717	-8.25145	2.03526	-4.05425	5.02954e-05	0.00566208
AravsEVm024870t1	27.8873	-8.26912	1.80865	-4.57199	4.83109e-06	0.000844355
AravsEVm018700t1	28.075	-8.27692	1.42109	-5.82433	5.73427e-09	1.64972e-06
AravsEVm000805t6	28.3903	-8.29426	1.93538	-4.28559	1.82254e-05	0.00249342
AravsEVm007727t5	28.682	-8.30877	2.00354	-4.14705	3.36792e-05	0.00408061
AravsEVm006367t1	29.0785	-8.32848	1.60168	-5.19984	1.99462e-07	4.8418e-05
AravsEVm002358t2	29.2135	-8.33412	2.52816	-3.29652	0.000978901	0.0473271
AravsEVm006297t4	29.4502	-8.34642	2.32754	-3.58594	0.000335863	0.022193
AravsEVm002150t7	29.4911	-8.34972	1.57044	-5.31679	1.05614e-07	2.71452e-05
AravsEVm068962t1	29.7483	-8.35987	1.48497	-5.62965	1.80576e-08	4.97011e-06
AravsEVm006138t2	44.6564	-8.36544	1.36094	-6.1468	7.90615e-10	2.352e-07
AravsEVm002695t5	29.878	-8.36652	2.05616	-4.06901	4.72136e-05	0.00537574
AravsEVm001572t3	29.887	-8.3676	2.51205	-3.33098	0.000865415	0.0433079
AravsEVm004190t1	29.988	-8.372	1.50269	-5.57134	2.52792e-08	6.87654e-06
AravsEVm000808t1	30.0259	-8.37349	2.51775	-3.32579	0.000881695	0.043809
AravsEVm010970t3	30.0137	-8.37354	2.54476	-3.29051	0.00100007	0.048102
AravsEVm000691t3	30.1605	-8.38031	1.96562	-4.26344	2.01305e-05	0.0027116
AravsEVm026293t1	45.1931	-8.38472	1.91046	-4.38885	1.13952e-05	0.00172433
AravsEVm005597t1	30.2118	-8.3848	1.67778	-4.99757	5.80585e-07	0.000132211
AravsEVm011637t1	30.5613	-8.40033	2.46565	-3.40695	0.000656936	0.0355467
AravsEVm003194t6	30.8435	-8.41334	1.94887	-4.31704	1.58139e-05	0.00221553
AravsEVm006451t13	30.9141	-8.41732	2.06159	-4.08292	4.4473e-05	0.00510526
AravsEVm007405t4	31.4653	-8.44218	2.57164	-3.2828	0.0010278	0.0491139
AravsEVm029344t4	31.4821	-8.44398	1.57456	-5.36277	8.19567e-08	2.12996e-05
AravsEVm003178t4	31.557	-8.44598	2.08681	-4.04732	5.1807e-05	0.00578566
AravsEVm049193t1	31.711	-8.45342	1.96615	-4.29947	1.71207e-05	0.00236543
AravsEVm007188t2	31.7494	-8.45514	2.44208	-3.46228	0.000535627	0.0307436
AravsEVm014481t2	31.7492	-8.45533	2.44287	-3.46123	0.000537721	0.0307877
AravsEVm010189t1	31.8066	-8.45696	1.99038	-4.24892	2.14805e-05	0.00286377
AravsEVm001108t2	32.3697	-8.48189	2.49965	-3.39323	0.000690743	0.0369188
AravsEVm007155t2	32.5592	-8.49244	1.68103	-5.05192	4.37387e-07	0.000101251
AravsEVm005491t5	32.6193	-8.49252	1.50069	-5.65907	1.52195e-08	4.20552e-06
AravsEVm000688t4	32.8957	-8.50542	2.47998	-3.42964	0.000604389	0.0332962
AravsEVm013049t1	33.2022	-8.51971	1.68324	-5.06148	4.16012e-07	9.66226e-05
AravsEVm045724t2	33.2532	-8.52215	2.51037	-3.39478	0.000686839	0.0367945
AravsEVm004902t1	33.2955	-8.52433	1.61019	-5.294	1.19671e-07	3.04225e-05
AravsEVm016039t10	33.4814	-8.53216	2.0011	-4.26374	2.01036e-05	0.0027116
AravsEVm015495t12	33.5724	-8.53619	1.99285	-4.28341	1.84052e-05	0.0025131
AravsEVm008216t1	33.634	-8.53714	1.4768	-5.78082	7.43391e-09	2.10407e-06
AravsEVm031618t1	33.6505	-8.53883	2.21854	-3.84886	0.000118669	0.0106909
AravsEVm015158t1	33.6518	-8.53926	2.45419	-3.47947	0.000502416	0.0292855
AravsEVm012703t5	33.6936	-8.54088	2.02846	-4.21053	2.54777e-05	0.00328019
AravsEVm001423t3	33.7442	-8.54215	2.48677	-3.43504	0.000592462	0.0328462
AravsEVm029590t3	33.754	-8.54286	1.99905	-4.27346	1.92462e-05	0.00261262
AravsEVm013894t5	33.8861	-8.54747	1.50281	-5.68767	1.28788e-08	3.57285e-06
AravsEVm000247t1	34.2307	-8.56346	2.49494	-3.43234	0.000598404	0.0330707
AravsEVm000436t4	34.7191	-8.58394	1.99539	-4.30188	1.69357e-05	0.00234686
AravsEVm022109t1	34.8637	-8.5899	2.23252	-3.84763	0.000119267	0.0107209
AravsEVm001415t2	35.1508	-8.6007	1.62526	-5.29188	1.21067e-07	3.06659e-05
AravsEVm012306t4	35.1621	-8.60282	1.98596	-4.33182	1.47885e-05	0.00211424
AravsEVm028196t2	35.6187	-8.62115	2.51395	-3.42932	0.000605098	0.033309
AravsEVm000168t2	35.7011	-8.62438	2.4449	-3.52749	0.000419513	0.0259541
AravsEVm009072t2	35.8975	-8.63139	1.74404	-4.94908	7.45669e-07	0.00016393
AravsEVm003209t5	35.9385	-8.63405	2.45055	-3.52331	0.000426195	0.0260953
AravsEVm016659t1	35.9419	-8.63407	2.44732	-3.52797	0.000418758	0.0259534
AravsEVm001566t3	36.6644	-8.66217	2.47022	-3.50664	0.000453808	0.0271986
AravsEVm003056t2	36.9041	-8.67044	1.52291	-5.69333	1.24582e-08	3.46993e-06
AravsEVm014577t1	37.0085	-8.67598	1.98849	-4.3631	1.2823e-05	0.00189585
AravsEVm015765t1	37.2601	-8.68576	1.63079	-5.32609	1.00347e-07	2.58866e-05
AravsEVm038710t5	37.2874	-8.68789	1.8784	-4.62516	3.74307e-06	0.000674428
AravsEVm024450t2	37.6175	-8.69869	1.56203	-5.56882	2.56469e-08	6.94952e-06
AravsEVm016039t8	37.7899	-8.70667	2.02264	-4.30461	1.67282e-05	0.00232498
AravsEVm000010t1	38.0434	-8.71616	2.46488	-3.53614	0.000406019	0.0254076
AravsEVm010141t5	38.0951	-8.71777	1.94268	-4.48749	7.20673e-06	0.00118268
AravsEVm007802t5	38.5434	-8.73445	2.02068	-4.32253	1.54248e-05	0.00218289
AravsEVm024707t3	38.7427	-8.74215	1.5281	-5.72093	1.05944e-08	2.98652e-06
AravsEVm006104t2	38.7679	-8.74334	2.45952	-3.5549	0.000378121	0.0239877
AravsEVm011334t5	38.7915	-8.74412	2.45093	-3.56767	0.00036017	0.0232283
AravsEVm005853t1	38.9974	-8.75184	2.45786	-3.56075	0.000369795	0.0236095
AravsEVm000608t10	39.8536	-8.78348	1.9975	-4.39724	1.09634e-05	0.00166983
AravsEVm005659t2	39.9404	-8.78539	2.50238	-3.51081	0.000446744	0.0269496
AravsEVm000188t4	40.3304	-8.79943	2.49742	-3.52341	0.00042603	0.0260953
AravsEVm000077t1	41.3559	-8.83533	2.56538	-3.44406	0.000573041	0.0321004
AravsEVm015044t2	41.3855	-8.83696	1.57593	-5.60744	2.05341e-08	5.62957e-06
AravsEVm020375t4	41.5317	-8.84201	2.00253	-4.41543	1.00811e-05	0.00155923
AravsEVm007745t2	41.5395	-8.84272	2.46688	-3.58457	0.000337632	0.0222258
AravsEVm003842t3	41.7844	-8.85219	1.51757	-5.83315	5.43916e-09	1.57129e-06
AravsEVm007019t2	41.8712	-8.85446	2.03181	-4.35792	1.31302e-05	0.00193249
AravsEVm029351t1	62.8017	-8.85979	2.29623	-3.8584	0.00011413	0.0104298
AravsEVm064989t1	500.643	-8.86772	1.64757	-5.3823	7.35399e-08	1.92553e-05
AravsEVm002866t2	42.2915	-8.86901	2.03581	-4.35649	1.32163e-05	0.00194107
AravsEVm012306t2	42.6082	-8.87948	2.45791	-3.61261	0.000303132	0.0207764
AravsEVm000520t2	43.8892	-8.92194	2.56504	-3.47828	0.000504642	0.0293507
AravsEVm004574t2	43.8937	-8.92211	2.04392	-4.36519	1.27012e-05	0.00188924
AravsEVm010112t1	44.4238	-8.93869	2.55723	-3.49546	0.000473247	0.0280379
AravsEVm007663t5	44.6247	-8.94651	2.07978	-4.30165	1.69527e-05	0.00234686
AravsEVm008814t1	44.7064	-8.94908	2.25891	-3.96169	7.44219e-05	0.00754034
AravsEVm022778t3	45.1085	-8.96171	1.95031	-4.59501	4.32736e-06	0.000762497
AravsEVm004149t2	45.3476	-8.9678	1.51653	-5.91337	3.35187e-09	9.72319e-07
AravsEVm008286t1	46.4133	-9.00289	2.68186	-3.35696	0.000788052	0.0404202
AravsEVm011637t5	46.6718	-9.01148	1.80758	-4.98539	6.18366e-07	0.000138557
AravsEVm009237t2	47.4401	-9.03447	2.48421	-3.63676	0.000276093	0.0193598
AravsEVm000263t6	47.4985	-9.03547	2.00126	-4.51488	6.33516e-06	0.00105702
AravsEVm004786t5	48.574	-9.06795	2.05102	-4.4212	9.81538e-06	0.00152827
AravsEVm001765t2	48.9874	-9.08027	2.48864	-3.64869	0.00026358	0.0188722
AravsEVm011020t4	49.2151	-9.08593	1.47529	-6.15876	7.33152e-10	2.19977e-07
AravsEVm007155t4	49.356	-9.09174	1.64977	-5.51093	3.56948e-08	9.56101e-06
AravsEVm001561t2	49.5377	-9.09689	2.4917	-3.65088	0.000261343	0.0188125
AravsEVm001602t2	49.6521	-9.1002	2.48712	-3.65894	0.000253263	0.0183288
AravsEVm002063t2	52.6605	-9.18501	1.46086	-6.28739	3.22853e-10	9.72872e-08
AravsEVm005857t2	52.9399	-9.19232	1.45384	-6.32278	2.56892e-10	7.80839e-08
AravsEVm009821t4	53.4629	-9.20651	1.42324	-6.46868	9.88608e-11	3.04465e-08
AravsEVm005927t1	53.7732	-9.21502	1.41235	-6.52461	6.81808e-11	2.13745e-08
AravsEVm014505t5	54.3011	-9.22854	2.02269	-4.5625	5.05481e-06	0.000874708
AravsEVm004444t1	55.2013	-9.2524	1.99156	-4.6458	3.38759e-06	0.000621592
AravsEVm001707t2	55.4653	-9.25894	2.03549	-4.54876	5.3962e-06	0.000922368
AravsEVm007731t2	55.5513	-9.26202	2.47857	-3.73685	0.000186342	0.0149566
AravsEVm007287t6	56.0428	-9.2739	2.57146	-3.60647	0.000310386	0.0210714
AravsEVm001310t5	56.2774	-9.28068	1.96169	-4.73097	2.23454e-06	0.000429166
AravsEVm023727t1	57.3175	-9.30723	2.48924	-3.73899	0.000184765	0.0148812
AravsEVm003996t2	58.2114	-9.32877	2.56222	-3.64089	0.000271692	0.0191653
AravsEVm014612t1	58.2946	-9.33175	2.12078	-4.40014	1.08179e-05	0.00165851
AravsEVm011667t1	58.5488	-9.33762	2.5477	-3.66512	0.000247224	0.0181358
AravsEVm004071t3	60.4562	-9.3838	2.00387	-4.68283	2.82934e-06	0.000530294
AravsEVm002903t2	61.4315	-9.40731	2.08248	-4.51736	6.26153e-06	0.00104975
AravsEVm002671t3	63.0763	-9.44487	1.48848	-6.34531	2.21981e-10	6.80644e-08
AravsEVm039913t1	63.1202	-9.44678	1.45402	-6.49699	8.19414e-11	2.54601e-08
AravsEVm013630t2	64.4405	-9.47599	1.40693	-6.73522	1.63685e-11	5.29777e-09
AravsEVm000315t1	64.7578	-9.48341	2.02289	-4.68804	2.75832e-06	0.00051837
AravsEVm002053t2	64.9317	-9.48713	1.60109	-5.92541	3.11528e-09	9.07454e-07
AravsEVm005274t6	65.7497	-9.50536	2.20519	-4.31045	1.62926e-05	0.00227349
AravsEVm064000t3	65.9886	-9.5104	2.49815	-3.80698	0.000140671	0.0121206
AravsEVm008758t2	66.7871	-9.52757	2.58557	-3.6849	0.000228797	0.0171255
AravsEVm007671t2	66.9132	-9.53065	1.37188	-6.94714	3.72772e-12	1.27124e-09
AravsEVm008936t1	67.7691	-9.54878	2.49476	-3.82754	0.000129431	0.011339
AravsEVm007155t1	68.4424	-9.56271	2.03824	-4.69166	2.71002e-06	0.000510668
AravsEVm004340t7	68.7324	-9.56906	1.51232	-6.32741	2.49308e-10	7.61097e-08
AravsEVm003155t1	71.2786	-9.6216	2.4994	-3.84956	0.000118332	0.0106743
AravsEVm005067t1	71.521	-9.62701	1.47819	-6.51272	7.38003e-11	2.3033e-08
AravsEVm002204t5	74.3937	-9.68228	1.46069	-6.62856	3.38984e-11	1.0772e-08
AravsEVm000345t4	75.6564	-9.70768	2.1043	-4.61326	3.96411e-06	0.000710592
AravsEVm007731t1	76.0185	-9.71444	2.5025	-3.88189	0.000103649	0.00976561
AravsEVm001113t3	77.1654	-9.73546	1.45184	-6.70559	2.00596e-11	6.46252e-09
AravsEVm007673t4	80.1692	-9.79077	2.54513	-3.84687	0.000119638	0.0107338
AravsEVm000257t2	80.5029	-9.79654	1.5136	-6.47234	9.64977e-11	2.98502e-08
AravsEVm028196t1	82.4745	-9.83199	2.51334	-3.91192	9.15655e-05	0.00891552
AravsEVm006299t2	124.721	-9.85003	1.88205	-5.23368	1.66168e-07	4.09043e-05
AravsEVm001560t4	85.1293	-9.87793	1.43405	-6.88813	5.65289e-12	1.89088e-09
AravsEVm008959t1	85.5872	-9.88552	2.05468	-4.81122	1.50013e-06	0.000303982
AravsEVm028696t1	91.7696	-9.98609	2.52192	-3.95971	7.50402e-05	0.00759199
AravsEVm001818t6	92.5005	-9.99744	1.64902	-6.06267	1.33882e-09	3.94923e-07
AravsEVm004340t6	93.9711	-10.0201	2.05935	-4.86567	1.1407e-06	0.000238761
AravsEVm000665t2	100.672	-10.1197	2.08019	-4.8648	1.14572e-06	0.000239096
AravsEVm017836t2	105.019	-10.1806	2.0211	-5.03718	4.72433e-07	0.000109003
AravsEVm008758t1	166.954	-10.2714	2.17771	-4.71661	2.39806e-06	0.000456808
AravsEVm004407t1	119.064	-10.3615	1.64666	-6.29244	3.12517e-10	9.45804e-08
AravsEVm005403t8	121.272	-10.3877	2.15327	-4.82415	1.40599e-06	0.000286568
AravsEVm010336t2	136.494	-10.5587	2.5527	-4.13631	3.52932e-05	0.00423943
AravsEVm012870t4	141.718	-10.613	1.59902	-6.63719	3.19727e-11	1.02064e-08
AravsEVm010336t1	142.74	-10.6233	2.55427	-4.15903	3.196e-05	0.00391987
AravsEVm024465t1	145.825	-10.6541	2.55829	-4.16455	3.11966e-05	0.00383295
AravsEVm012402t6	155.917	-10.7503	2.14754	-5.00588	5.56072e-07	0.000127043
AravsEVm009960t5	159.132	-10.7798	2.12033	-5.08401	3.6955e-07	8.69873e-05
AravsEVm030316t1	162.928	-10.8141	2.56617	-4.21411	2.50764e-05	0.00324378
AravsEVm013774t1	167.468	-10.854	1.46541	-7.40682	1.29365e-13	6.70692e-11
[truncated: 34 more rows]
