# Supplementary material for: Characterization of gene expression patterns in response to an orthotospovirus infection between two diploid peanut species and their hybrid
Source: Front Plant Sci. 2023 Nov 13;14:1270531. doi: 10.3389/fpls.2023.1270531 (PMC10683084; doi:10.3389/fpls.2023.1270531)
Supplement: Supplementary file 3 [file Table_2.xlsx]

## Sheet: Table S15
cluster_name	protein_number	swiss_prot_id	go_annotation	protein_list
cluster1	20	Q94984	GO:0042302; F:structural constituent of cuticle; IEA:UniProtKB-KW	Arachis_valida|AravalEVm040447t1;Arachis_valida|AravalEVm004934t3;Arachis_valida|AravalEVm004934t6;Arachis_valida|AravalEVm027812t1;Arachis_valida|AravalEVm035671t1;Arachis_valida|AravalEVm050599t1;Arachis_valida|AravalEVm051826t1;Arachis_valida|AravalEVm053331t1;Arachis_valida|AravalEVm057624t1;Arachis_valida|AravalEVm057624t2;Arachis_valida|AravalEVm058512t1;Arachis_valida|AravalEVm058512t2;Ara…
cluster2	17	F4JNA9	GO:0007165; P:signal transduction; IEA:InterPro	Arachis_valida|AravalEVm000705t4;Arachis_valida|AravalEVm000705t1;Arachis_hypogaea_Tifguard|ArahypEVm000308t2;Arachis_hypogaea_Tifguard|ArahypEVm000245t6;Arachis_hypogaea_Tifguard|ArahypEVm000245t5;Arachis_hypogaea_Tifguard|ArahypEVm000245t4;Arachis_hypogaea_Tifguard|ArahypEVm000245t2;Arachis_hypogaea_SunOleic_97R|ArahypEVm000308t4;Arachis_hypogaea_SunOleic_97R|ArahypEVm000308t2;Arachis_hypogaea_…
cluster3	13	Q8LPK5	GO:0009414; P:response to water deprivation; IMP:TAIR	Arachis_valida|AravalEVm001317t5;Arachis_valida|AravalEVm001317t4;Arachis_valida|AravalEVm000795t1;Arachis_valida|AravalEVm000842t1;Arachis_valida|AravalEVm003033t1;Arachis_valida|AravalEVm003055t6;Arachis_valida|AravalEVm017897t2;Arachis_valida|AravalEVm003055t4;Arachis_valida|AravalEVm003055t2;Arachis_valida|AravalEVm003055t7;Arachis_valida|AravalEVm006149t3;Arachis_valida|AravalEVm000810t4;Ara…
cluster4	13	P38414	GO:0031408; P:oxylipin biosynthetic process; IEA:UniProtKB-UniPathway	Arachis_valida|AravalEVm002247t1;Arachis_valida|AravalEVm002249t1;Valsten1|AravsEVm003056t2;Arachis_stenosperma|ArasteEVm001500t9;Arachis_stenosperma|ArasteEVm001500t5;Arachis_stenosperma|ArasteEVm001500t4;Arachis_stenosperma|ArasteEVm001500t1;Arachis_valida|AravalEVm002066t1;Arachis_hypogaea_SunOleic_97R|ArahypEVm004621t2;Arachis_hypogaea_Tifguard|ArahypEVm015385t1;Arachis_stenosperma|ArasteEVm0…
cluster5	13	Q69VD5	GO:0019827; P:stem cell population maintenance; IMP:Gramene	Arachis_valida|AravalEVm001893t1;Arachis_hypogaea_Tifguard|ArahypEVm000621t2;Arachis_stenosperma|ArasteEVm001137t1;Arachis_hypogaea_SunOleic_97R|ArahypEVm000621t1;Arachis_hypogaea_Tifguard|ArahypEVm000621t1;Arachis_stenosperma|ArasteEVm001559t2;Arachis_hypogaea_Tifguard|ArahypEVm000621t10;Arachis_hypogaea_SunOleic_97R|ArahypEVm000621t10;Arachis_hypogaea_Tifguard|ArahypEVm000621t4;Arachis_hypogaea…
cluster6	13	Q00416	GO:0008033; P:tRNA processing; IMP:SGD	Arachis_hypogaea_Tifguard|ArahypEVm000681t5;Arachis_hypogaea_Tifguard|ArahypEVm000681t1;Arachis_hypogaea_Tifguard|ArahypEVm000681t3;Arachis_hypogaea_Tifguard|ArahypEVm000681t4;Arachis_hypogaea_Tifguard|ArahypEVm000681t8;Arachis_hypogaea_Tifguard|ArahypEVm000681t9;Arachis_hypogaea_SunOleic_97R|ArahypEVm000681t5;Arachis_hypogaea_SunOleic_97R|ArahypEVm000681t1;Arachis_hypogaea_SunOleic_97R|ArahypEVm…
cluster7	11	Q5ZK84	GO:0019853; P:L-ascorbic acid biosynthetic process; IBA:GO_Central	Arachis_valida|AravalEVm022114t1;Arachis_valida|AravalEVm022737t1;Arachis_valida|AravalEVm023343t1;Arachis_valida|AravalEVm023513t1;Arachis_valida|AravalEVm024693t1;Arachis_valida|AravalEVm023949t1;Arachis_valida|AravalEVm025797t1;Arachis_valida|AravalEVm022622t1;Arachis_valida|AravalEVm023343t2;Arachis_valida|AravalEVm021485t1;Arachis_valida|AravalEVm021295t1
cluster8	11	O00370	GO:0032197; P:transposition, RNA-mediated; IMP:UniProtKB	Arachis_valida|AravalEVm012415t1;Arachis_valida|AravalEVm000644t1;Arachis_valida|AravalEVm014453t2;Arachis_valida|AravalEVm002889t1;Arachis_valida|AravalEVm008624t1;Arachis_valida|AravalEVm008624t2;Arachis_hypogaea_Tifguard|ArahypEVm016040t1;Arachis_stenosperma|ArasteEVm034117t1;Arachis_hypogaea_SunOleic_97R|ArahypEVm024578t1;Valsten1|AravsEVm014986t1;Valsten1|AravsEVm041495t1
cluster9	11	B2D0J5	GO:0052689; F:carboxylic ester hydrolase activity; IEA:UniProtKB-KW	Arachis_valida|AravalEVm007275t1;Arachis_valida|AravalEVm004627t1;Arachis_valida|AravalEVm005085t1;Arachis_valida|AravalEVm005182t1;Arachis_valida|AravalEVm005223t1;Arachis_valida|AravalEVm005223t2;Arachis_valida|AravalEVm005223t4;Arachis_valida|AravalEVm005223t5;Arachis_valida|AravalEVm006061t1;Arachis_valida|AravalEVm006426t1;Arachis_valida|AravalEVm007300t1
cluster10	11	O24367	GO:0006952; P:defense response; IEA:UniProtKB-KW	Arachis_valida|AravalEVm000310t3;Arachis_hypogaea_Tifguard|ArahypEVm000165t1;Arachis_stenosperma|ArasteEVm000383t4;Arachis_stenosperma|ArasteEVm000231t5;Arachis_hypogaea_SunOleic_97R|ArahypEVm000175t7;Arachis_hypogaea_SunOleic_97R|ArahypEVm000175t13;Arachis_hypogaea_SunOleic_97R|ArahypEVm000175t4;Valsten1|AravsEVm001200t1;Arachis_hypogaea_SunOleic_97R|ArahypEVm000230t3;Arachis_valida|AravalEVm000…
cluster11	10	P15145	GO:0006508; P:proteolysis; IBA:GO_Central	Arachis_valida|AravalEVm001018t1;Arachis_valida|AravalEVm000049t1;Arachis_valida|AravalEVm000929t1;Arachis_valida|AravalEVm001018t2;Arachis_valida|AravalEVm001216t1;Arachis_valida|AravalEVm001547t1;Arachis_valida|AravalEVm004465t1;Arachis_valida|AravalEVm003328t1;Arachis_valida|AravalEVm001532t1;Arachis_valida|AravalEVm021083t1
cluster12	10	N/A	N/A	Arachis_valida|AravalEVm033323t10;Arachis_valida|AravalEVm033323t1;Arachis_valida|AravalEVm033323t14;Arachis_valida|AravalEVm033323t15;Arachis_valida|AravalEVm033323t4;Arachis_valida|AravalEVm033323t5;Arachis_valida|AravalEVm033323t6;Arachis_valida|AravalEVm033323t7;Arachis_valida|AravalEVm033323t8;Arachis_stenosperma|ArasteEVm021451t11
cluster13	10	Q8LKZ8	GO:0009626; P:plant-type hypersensitive response; IMP:TAIR	Arachis_valida|AravalEVm000015t9;Arachis_valida|AravalEVm000015t1;Arachis_valida|AravalEVm000014t3;Arachis_valida|AravalEVm000014t4;Arachis_valida|AravalEVm000168t1;Valsten1|AravsEVm003010t2;Arachis_stenosperma|ArasteEVm000050t5;Arachis_hypogaea_Tifguard|ArahypEVm000005t1;Arachis_hypogaea_SunOleic_97R|ArahypEVm000005t5;Arachis_stenosperma|ArasteEVm006853t1
cluster14	10	Q8LF99	GO:0010411; P:xyloglucan metabolic process; IEA:InterPro	Arachis_valida|AravalEVm026303t1;Valsten1|AravsEVm017684t1;Arachis_valida|AravalEVm026303t2;Valsten1|AravsEVm017684t2;Arachis_valida|AravalEVm025716t2;Arachis_stenosperma|ArasteEVm028971t4;Arachis_hypogaea_SunOleic_97R|ArahypEVm013872t3;Arachis_hypogaea_SunOleic_97R|ArahypEVm013872t1;Arachis_hypogaea_SunOleic_97R|ArahypEVm013872t2;Arachis_hypogaea_SunOleic_97R|ArahypEVm013872t4
cluster15	10	Q9LD37	GO:0009624; P:response to nematode; IEP:TAIR	Arachis_valida|AravalEVm003495t2;Valsten1|AravsEVm008980t2;Arachis_hypogaea_Tifguard|ArahypEVm001582t2;Arachis_stenosperma|ArasteEVm002838t1;Arachis_hypogaea_SunOleic_97R|ArahypEVm001478t2;Arachis_stenosperma|ArasteEVm002838t6;Arachis_hypogaea_Tifguard|ArahypEVm001478t4;Arachis_hypogaea_Tifguard|ArahypEVm001478t3;Arachis_hypogaea_SunOleic_97R|ArahypEVm001478t4;Arachis_hypogaea_SunOleic_97R|Arahyp…
cluster16	10	F4K3G5	GO:0010228; P:vegetative to reproductive phase transition of meristem; IMP:UniProtKB	Arachis_valida|AravalEVm001485t3;Valsten1|AravsEVm000388t6;Arachis_hypogaea_Tifguard|ArahypEVm005556t10;Arachis_stenosperma|ArasteEVm000794t1;Arachis_hypogaea_SunOleic_97R|ArahypEVm005556t10;Valsten1|AravsEVm000388t5;Arachis_stenosperma|ArasteEVm000794t4;Arachis_hypogaea_Tifguard|ArahypEVm005556t1;Arachis_hypogaea_SunOleic_97R|ArahypEVm005556t1;Arachis_hypogaea_SunOleic_97R|ArahypEVm016981t2
cluster17	9	Q4WC50	GO:0015793; P:glycerol transport; IBA:GO_Central	Arachis_valida|AravalEVm009127t1;Arachis_valida|AravalEVm006807t4;Arachis_valida|AravalEVm007141t2;Arachis_valida|AravalEVm007141t4;Arachis_valida|AravalEVm008493t1;Arachis_valida|AravalEVm008667t3;Arachis_valida|AravalEVm009426t1;Arachis_valida|AravalEVm008462t2;Arachis_valida|AravalEVm019181t1
cluster18	9	Q9FN03	GO:0010224; P:response to UV-B; IGI:TAIR	Arachis_valida|AravalEVm010921t2;Arachis_valida|AravalEVm010921t5;Arachis_stenosperma|ArasteEVm006180t4;Arachis_hypogaea_SunOleic_97R|ArahypEVm021452t2;Arachis_hypogaea_SunOleic_97R|ArahypEVm021452t1;Arachis_hypogaea_SunOleic_97R|ArahypEVm022918t1;Arachis_stenosperma|ArasteEVm006180t5;Arachis_stenosperma|ArasteEVm007191t1;Arachis_stenosperma|ArasteEVm009284t6
cluster19	9	P38680	GO:0003333; P:amino acid transmembrane transport; IBA:GO_Central	Arachis_valida|AravalEVm011018t1;Arachis_valida|AravalEVm011950t1;Arachis_valida|AravalEVm014654t1;Arachis_valida|AravalEVm016382t1;Arachis_valida|AravalEVm011251t5;Arachis_valida|AravalEVm012033t1;Arachis_valida|AravalEVm012138t1;Arachis_valida|AravalEVm016515t1;Arachis_valida|AravalEVm016515t2
cluster20	9	F6M8H4	GO:0010333; F:terpene synthase activity; IEA:InterPro	Arachis_valida|AravalEVm007673t2;Arachis_valida|AravalEVm007673t1;Valsten1|AravsEVm005274t6;Arachis_hypogaea_Tifguard|ArahypEVm003566t2;Arachis_stenosperma|ArasteEVm005439t2;Arachis_hypogaea_SunOleic_97R|ArahypEVm003566t1;Arachis_hypogaea_SunOleic_97R|ArahypEVm003566t2;Arachis_stenosperma|ArasteEVm007904t1;Arachis_hypogaea_SunOleic_97R|ArahypEVm003888t10
cluster21	9	Q764T8	GO:0019745; P:pentacyclic triterpenoid biosynthetic process; IDA:UniProtKB	Arachis_valida|AravalEVm011351t1;Arachis_valida|AravalEVm003370t1;Arachis_valida|AravalEVm003392t1;Arachis_valida|AravalEVm003392t2;Arachis_valida|AravalEVm003392t5;Arachis_valida|AravalEVm003392t8;Arachis_valida|AravalEVm010124t4;Arachis_valida|AravalEVm010124t7;Arachis_valida|AravalEVm047479t1
cluster22	9	P22180	GO:0051453; P:regulation of intracellular pH; IBA:GO_Central	Arachis_valida|AravalEVm001590t2;Arachis_valida|AravalEVm001590t1;Valsten1|AravsEVm001727t1;Arachis_hypogaea_SunOleic_97R|ArahypEVm000643t3;Arachis_hypogaea_SunOleic_97R|ArahypEVm000643t2;Arachis_hypogaea_SunOleic_97R|ArahypEVm000643t1;Arachis_valida|AravalEVm008220t1;Arachis_stenosperma|ArasteEVm001356t1;Arachis_stenosperma|ArasteEVm001356t4
cluster23	9	O81832	GO:0048544; P:recognition of pollen; IEA:InterPro	Arachis_valida|AravalEVm003234t7;Arachis_valida|AravalEVm003234t5;Arachis_valida|AravalEVm003234t8;Valsten1|AravsEVm001726t4;Arachis_hypogaea_Tifguard|ArahypEVm001104t5;Arachis_hypogaea_SunOleic_97R|ArahypEVm001104t5;Arachis_valida|AravalEVm003234t4;Valsten1|AravsEVm001726t2;Arachis_stenosperma|ArasteEVm006005t5
cluster24	9	P02723	GO:1990544; P:mitochondrial ATP transmembrane transport; IEA:EnsemblFungi	Arachis_valida|AravalEVm023073t1;Arachis_valida|AravalEVm023073t5;Arachis_valida|AravalEVm023073t6;Arachis_valida|AravalEVm023073t7;Arachis_valida|AravalEVm023073t8;Arachis_hypogaea_Tifguard|ArahypEVm010084t1;Valsten1|AravsEVm016221t5;Arachis_stenosperma|ArasteEVm012575t2;Arachis_stenosperma|ArasteEVm012508t1
cluster25	8	Q40784	GO:0005975; P:carbohydrate metabolic process; IEA:InterPro	Arachis_valida|AravalEVm024837t1;Arachis_valida|AravalEVm024837t2;Arachis_hypogaea_Tifguard|ArahypEVm012925t4;Arachis_stenosperma|ArasteEVm016092t1;Arachis_valida|AravalEVm023468t4;Valsten1|AravsEVm015765t1;Arachis_hypogaea_SunOleic_97R|ArahypEVm018629t3;Arachis_hypogaea_SunOleic_97R|ArahypEVm018629t1
cluster26	8	Q54P77	GO:0009698; P:phenylpropanoid metabolic process; IEA:UniProtKB-KW	Arachis_valida|AravalEVm007664t1;Arachis_valida|AravalEVm005333t2;Arachis_valida|AravalEVm007168t1;Arachis_valida|AravalEVm007468t5;Arachis_valida|AravalEVm007681t2;Arachis_valida|AravalEVm028881t1;Arachis_hypogaea_SunOleic_97R|ArahypEVm010969t2;Arachis_hypogaea_SunOleic_97R|ArahypEVm010969t1
cluster27	8	A1CJT5	GO:0003743; F:translation initiation factor activity; IEA:UniProtKB-KW	Arachis_valida|AravalEVm016178t2;Arachis_valida|AravalEVm016178t3;Arachis_hypogaea_Tifguard|ArahypEVm009985t1;Arachis_stenosperma|ArasteEVm010871t2;Arachis_hypogaea_SunOleic_97R|ArahypEVm009985t6;Arachis_hypogaea_Tifguard|ArahypEVm009985t2;Arachis_hypogaea_Tifguard|ArahypEVm009985t6;Arachis_stenosperma|ArasteEVm010829t1
cluster28	8	Q9SSA7	GO:0016042; P:lipid catabolic process; IEA:UniProtKB-KW	Arachis_valida|AravalEVm018595t1;Arachis_valida|AravalEVm018595t2;Arachis_hypogaea_Tifguard|ArahypEVm008002t6;Arachis_hypogaea_SunOleic_97R|ArahypEVm008002t6;Valsten1|AravsEVm012592t3;Arachis_hypogaea_Tifguard|ArahypEVm010107t1;Arachis_hypogaea_SunOleic_97R|ArahypEVm010107t1;Valsten1|AravsEVm012592t1
cluster29	8	Q93ZB9	GO:0010025; P:wax biosynthetic process; IMP:TAIR	Arachis_valida|AravalEVm011011t4;Arachis_valida|AravalEVm010899t1;Arachis_valida|AravalEVm011011t1;Arachis_valida|AravalEVm011011t2;Arachis_valida|AravalEVm011011t5;Arachis_hypogaea_SunOleic_97R|ArahypEVm005452t1;Arachis_stenosperma|ArasteEVm007749t3;Arachis_hypogaea_SunOleic_97R|ArahypEVm005596t3
cluster30	8	P41233	GO:0043691; P:reverse cholesterol transport; IMP:BHF-UCL	Arachis_valida|AravalEVm001189t1;Arachis_valida|AravalEVm005187t1;Valsten1|AravsEVm000077t1;Arachis_hypogaea_Tifguard|ArahypEVm000605t2;Arachis_stenosperma|ArasteEVm001154t5;Arachis_hypogaea_SunOleic_97R|ArahypEVm000605t1;Arachis_hypogaea_Tifguard|ArahypEVm000605t1;Arachis_hypogaea_Tifguard|ArahypEVm000605t3
cluster31	8	Q8GYA4	GO:0006468; P:protein phosphorylation; IBA:GO_Central	Arachis_valida|AravalEVm004715t3;Arachis_valida|AravalEVm004715t4;Arachis_hypogaea_Tifguard|ArahypEVm002113t1;Arachis_hypogaea_SunOleic_97R|ArahypEVm002165t1;Arachis_hypogaea_Tifguard|ArahypEVm002113t6;Arachis_hypogaea_SunOleic_97R|ArahypEVm002113t1;Arachis_hypogaea_SunOleic_97R|ArahypEVm002113t6;Arachis_stenosperma|ArasteEVm003310t2
cluster32	8	Q8LPK2	GO:0042626; F:ATPase activity, coupled to transmembrane movement of substances; IBA:GO_Central	Arachis_valida|AravalEVm000530t5;Arachis_valida|AravalEVm000530t6;Valsten1|AravsEVm000384t4;Arachis_valida|AravalEVm000530t4;Arachis_stenosperma|ArasteEVm000422t4;Arachis_valida|AravalEVm004685t2;Arachis_hypogaea_Tifguard|ArahypEVm000089t4;Arachis_hypogaea_SunOleic_97R|ArahypEVm000089t5
cluster33	8	Q9AR07	GO:0009611; P:response to wounding; IEP:TAIR	Arachis_valida|AravalEVm015279t3;Arachis_valida|AravalEVm015279t1;Arachis_valida|AravalEVm015279t4;Arachis_hypogaea_Tifguard|ArahypEVm010276t4;Arachis_hypogaea_Tifguard|ArahypEVm010276t3;Arachis_stenosperma|ArasteEVm012234t1;Arachis_hypogaea_SunOleic_97R|ArahypEVm009637t1;Arachis_hypogaea_SunOleic_97R|ArahypEVm008668t1
cluster34	8	Q9VJI3	GO:0030241; P:skeletal muscle myosin thick filament assembly; IMP:FlyBase	Arachis_valida|AravalEVm000087t6;Arachis_valida|AravalEVm000087t1;Arachis_valida|AravalEVm000087t2;Arachis_valida|AravalEVm000087t5;Arachis_valida|AravalEVm000087t7;Arachis_valida|AravalEVm000087t8;Valsten1|AravsEVm000067t6;Arachis_stenosperma|ArasteEVm000088t1
cluster35	8	Q00319	GO:0022857; F:transmembrane transporter activity; IEA:InterPro	Arachis_valida|AravalEVm017550t1;Arachis_valida|AravalEVm021593t1;Arachis_valida|AravalEVm004415t1;Arachis_valida|AravalEVm024628t1;Arachis_valida|AravalEVm018448t1;Arachis_valida|AravalEVm024297t1;Arachis_valida|AravalEVm024984t1;Arachis_stenosperma|ArasteEVm024435t1
cluster36	8	O14405	GO:0030245; P:cellulose catabolic process; IDA:UniProtKB	Arachis_valida|AravalEVm045211t1;Arachis_valida|AravalEVm012930t1;Arachis_valida|AravalEVm012930t2;Arachis_valida|AravalEVm012930t3;Arachis_valida|AravalEVm012930t6;Arachis_valida|AravalEVm028999t3;Arachis_valida|AravalEVm031761t1;Valsten1|AravsEVm014304t1
cluster37	8	Q9Y884	GO:0031098; P:stress-activated protein kinase signaling cascade; IBA:GO_Central	Arachis_valida|AravalEVm009750t1;Arachis_valida|AravalEVm009943t1;Arachis_valida|AravalEVm005839t1;Arachis_valida|AravalEVm009600t1;Valsten1|AravsEVm013063t2;Arachis_hypogaea_Tifguard|ArahypEVm010341t5;Arachis_hypogaea_SunOleic_97R|ArahypEVm010341t6;Arachis_hypogaea_Tifguard|ArahypEVm010341t6
cluster38	8	Q0JLP9	GO:0009738; P:abscisic acid-activated signaling pathway; IEA:UniProtKB-KW	Arachis_valida|AravalEVm008069t1;Arachis_valida|AravalEVm008069t2;Arachis_valida|AravalEVm027461t4;Valsten1|AravsEVm012665t3;Arachis_stenosperma|ArasteEVm018386t5;Arachis_hypogaea_Tifguard|ArahypEVm009282t7;Arachis_hypogaea_SunOleic_97R|ArahypEVm009282t3;Arachis_hypogaea_SunOleic_97R|ArahypEVm009282t8
cluster39	8	Q8GT20	GO:0016747; F:transferase activity, transferring acyl groups other than amino-acyl groups; IEA:InterPro	Arachis_valida|AravalEVm011911t7;Arachis_valida|AravalEVm011911t3;Arachis_hypogaea_SunOleic_97R|ArahypEVm013946t2;Valsten1|AravsEVm012517t1;Arachis_hypogaea_Tifguard|ArahypEVm006655t3;Arachis_hypogaea_SunOleic_97R|ArahypEVm006655t3;Arachis_hypogaea_SunOleic_97R|ArahypEVm013946t1;Arachis_hypogaea_Tifguard|ArahypEVm006655t1
cluster40	8	Q9M1S3	GO:0009414; P:response to water deprivation; IMP:TAIR	Arachis_valida|AravalEVm026198t4;Arachis_hypogaea_Tifguard|ArahypEVm011509t2;Arachis_stenosperma|ArasteEVm007926t2;Arachis_hypogaea_SunOleic_97R|ArahypEVm015465t4;Arachis_stenosperma|ArasteEVm007445t1;Arachis_stenosperma|ArasteEVm008701t1;Arachis_stenosperma|ArasteEVm019341t2;Arachis_valida|AravalEVm046304t1
cluster41	8	Q16798	GO:0006099; P:tricarboxylic acid cycle; TAS:Reactome	Arachis_valida|AravalEVm005734t1;Valsten1|AravsEVm009009t3;Arachis_hypogaea_Tifguard|ArahypEVm003902t2;Arachis_stenosperma|ArasteEVm010729t7;Arachis_hypogaea_SunOleic_97R|ArahypEVm003218t7;Arachis_hypogaea_SunOleic_97R|ArahypEVm003218t11;Arachis_stenosperma|ArasteEVm003897t5;Arachis_stenosperma|ArasteEVm003897t4
cluster42	8	P0CV94	GO:0016114; P:terpenoid biosynthetic process; IEA:UniProtKB-UniPathway	Arachis_hypogaea_Tifguard|ArahypEVm003632t6;Arachis_stenosperma|ArasteEVm004946t4;Arachis_hypogaea_SunOleic_97R|ArahypEVm003632t5;Arachis_hypogaea_SunOleic_97R|ArahypEVm003632t1;Arachis_hypogaea_SunOleic_97R|ArahypEVm003632t3;Arachis_hypogaea_SunOleic_97R|ArahypEVm003632t4;Arachis_hypogaea_SunOleic_97R|ArahypEVm003632t2;Arachis_hypogaea_SunOleic_97R|ArahypEVm003632t6
cluster43	8	P92520	GO:0000943; C:retrotransposon nucleocapsid; IEA:InterPro	Arachis_hypogaea_Tifguard|ArahypEVm028681t1;Arachis_hypogaea_SunOleic_97R|ArahypEVm016685t2;Arachis_valida|AravalEVm038234t1;Valsten1|AravsEVm000257t2;Valsten1|AravsEVm000257t6;Arachis_hypogaea_SunOleic_97R|ArahypEVm027660t1;Arachis_valida|AravalEVm063293t1;Arachis_stenosperma|ArasteEVm001126t1
cluster44	8	P02519	GO:0009651; P:response to salt stress; IBA:GO_Central	Arachis_valida|AravalEVm052650t2;Valsten1|AravsEVm038060t1;Arachis_hypogaea_Tifguard|ArahypEVm024939t4;Arachis_stenosperma|ArasteEVm033435t1;Arachis_valida|AravalEVm054107t1;Valsten1|AravsEVm039359t1;Arachis_hypogaea_SunOleic_97R|ArahypEVm025489t1;Valsten1|AravsEVm036332t1
cluster45	8	Q8RXN0	GO:0055085; P:transmembrane transport; IBA:GO_Central	Arachis_valida|AravalEVm005166t1;Arachis_hypogaea_Tifguard|ArahypEVm002532t1;Arachis_hypogaea_SunOleic_97R|ArahypEVm002532t1;Arachis_valida|AravalEVm005095t3;Valsten1|AravsEVm002989t2;Arachis_stenosperma|ArasteEVm007699t1;Arachis_hypogaea_Tifguard|ArahypEVm004809t1;Arachis_hypogaea_SunOleic_97R|ArahypEVm004809t1
cluster46	8	N/A	N/A	Arachis_valida|AravalEVm004141t6;Arachis_hypogaea_SunOleic_97R|ArahypEVm002224t1;Arachis_valida|AravalEVm005233t1;Valsten1|AravsEVm003209t5;Arachis_stenosperma|ArasteEVm004099t3;Arachis_hypogaea_SunOleic_97R|ArahypEVm002224t3;Arachis_valida|AravalEVm004141t1;Arachis_valida|AravalEVm004141t5
cluster47	8	B8AVF0	GO:0005975; P:carbohydrate metabolic process; IEA:InterPro	Arachis_valida|AravalEVm009535t1;Arachis_hypogaea_Tifguard|ArahypEVm004693t1;Arachis_hypogaea_SunOleic_97R|ArahypEVm004693t1;Arachis_valida|AravalEVm007238t2;Valsten1|AravsEVm004902t1;Arachis_stenosperma|ArasteEVm006276t4;Arachis_hypogaea_Tifguard|ArahypEVm005550t3;Arachis_hypogaea_SunOleic_97R|ArahypEVm004693t5
cluster48	8	O81970	GO:0016709; F:oxidoreductase activity, acting on paired donors, with incorporation or reduction of molecular oxygen, NAD(P)H as one donor, and incorporation of one atom of oxygen; IBA:GO_Central	Arachis_valida|AravalEVm009962t6;Valsten1|AravsEVm006778t3;Arachis_hypogaea_Tifguard|ArahypEVm005249t7;Arachis_stenosperma|ArasteEVm007181t4;Arachis_hypogaea_SunOleic_97R|ArahypEVm005249t4;Valsten1|AravsEVm006778t1;Arachis_hypogaea_SunOleic_97R|ArahypEVm005380t2;Arachis_hypogaea_SunOleic_97R|ArahypEVm005380t1
cluster49	8	Q8VZR6	GO:0015798; P:myo-inositol transport; IMP:TAIR	Arachis_valida|AravalEVm010719t1;Valsten1|AravsEVm007155t2;Arachis_stenosperma|ArasteEVm007249t1;Arachis_hypogaea_SunOleic_97R|ArahypEVm012109t1;Valsten1|AravsEVm007155t1;Arachis_stenosperma|ArasteEVm007243t1;Valsten1|AravsEVm007155t3;Valsten1|AravsEVm007155t4
cluster50	8	Q40392	GO:0007165; P:signal transduction; IEA:InterPro	Arachis_valida|AravalEVm001471t2;Arachis_hypogaea_Tifguard|ArahypEVm002700t1;Arachis_hypogaea_Tifguard|ArahypEVm000333t2;Arachis_hypogaea_Tifguard|ArahypEVm000333t1;Arachis_stenosperma|ArasteEVm009216t3;Arachis_hypogaea_SunOleic_97R|ArahypEVm000534t2;Arachis_hypogaea_Tifguard|ArahypEVm000333t3;Arachis_hypogaea_Tifguard|ArahypEVm000534t2
cluster51	8	P14605	GO:0010515; P:negative regulation of induction of conjugation with cellular fusion; IMP:PomBase	Arachis_valida|AravalEVm002157t3;Valsten1|AravsEVm000608t10;Arachis_stenosperma|ArasteEVm000854t3;Arachis_hypogaea_SunOleic_97R|ArahypEVm000406t4;Valsten1|AravsEVm000608t1;Arachis_hypogaea_SunOleic_97R|ArahypEVm000406t2;Arachis_hypogaea_SunOleic_97R|ArahypEVm000406t3;Arachis_hypogaea_Tifguard|ArahypEVm000408t1
cluster52	8	Q9SZB9	GO:0006979; P:response to oxidative stress; IEA:InterPro	Arachis_valida|AravalEVm022096t1;Arachis_hypogaea_Tifguard|ArahypEVm012845t1;Arachis_hypogaea_SunOleic_97R|ArahypEVm012335t1;Arachis_hypogaea_Tifguard|ArahypEVm012681t4;Arachis_hypogaea_Tifguard|ArahypEVm012729t1;Arachis_hypogaea_SunOleic_97R|ArahypEVm012678t1;Arachis_stenosperma|ArasteEVm033030t1;Arachis_valida|AravalEVm034274t3
cluster53	8	Q7XA40	GO:0006952; P:defense response; IEA:UniProtKB-KW	Arachis_valida|AravalEVm028372t2;Arachis_hypogaea_Tifguard|ArahypEVm000198t1;Arachis_stenosperma|ArasteEVm012611t1;Arachis_valida|AravalEVm016437t10;Valsten1|AravsEVm011997t1;Arachis_hypogaea_Tifguard|ArahypEVm000167t8;Arachis_stenosperma|ArasteEVm000784t1;Arachis_hypogaea_SunOleic_97R|ArahypEVm000167t5
cluster54	8	F4JVB8	GO:0003700; F:DNA-binding transcription factor activity; ISS:TAIR	Arachis_valida|AravalEVm090210t1;Valsten1|AravsEVm074810t1;Arachis_stenosperma|ArasteEVm016329t1;Arachis_hypogaea_SunOleic_97R|ArahypEVm038206t1;Valsten1|AravsEVm073900t1;Valsten1|AravsEVm069110t1;Arachis_stenosperma|ArasteEVm016799t2;Valsten1|AravsEVm021669t2
cluster55	8	Q555C6	GO:0006623; P:protein targeting to vacuole; IBA:GO_Central	Arachis_valida|AravalEVm000003t2;Arachis_stenosperma|ArasteEVm000004t8;Arachis_stenosperma|ArasteEVm000004t3;Arachis_stenosperma|ArasteEVm000003t5;Arachis_stenosperma|ArasteEVm000003t4;Arachis_stenosperma|ArasteEVm000003t10;Arachis_hypogaea_SunOleic_97R|ArahypEVm000001t9;Arachis_stenosperma|ArasteEVm000004t11
cluster56	8	P42730	GO:0042542; P:response to hydrogen peroxide; IEP:TAIR	Arachis_valida|AravalEVm001894t1;Valsten1|AravsEVm001264t1;Arachis_hypogaea_Tifguard|ArahypEVm000776t2;Arachis_stenosperma|ArasteEVm001104t4;Arachis_hypogaea_SunOleic_97R|ArahypEVm000776t2;Arachis_stenosperma|ArasteEVm001104t5;Arachis_hypogaea_Tifguard|ArahypEVm000795t4;Arachis_hypogaea_SunOleic_97R|ArahypEVm000795t4
cluster57	8	Q40392	GO:0007165; P:signal transduction; IEA:InterPro	Arachis_hypogaea_SunOleic_97R|ArahypEVm000409t7;Arachis_hypogaea_SunOleic_97R|ArahypEVm000409t1;Arachis_hypogaea_SunOleic_97R|ArahypEVm000409t2;Arachis_hypogaea_SunOleic_97R|ArahypEVm000409t6;Arachis_hypogaea_SunOleic_97R|ArahypEVm000409t8;Arachis_hypogaea_Tifguard|ArahypEVm000283t3;Arachis_stenosperma|ArasteEVm004502t1;Arachis_hypogaea_Tifguard|ArahypEVm000409t5
cluster58	7	P32331	GO:0006839; P:mitochondrial transport; IGI:SGD	Arachis_valida|AravalEVm024933t2;Arachis_valida|AravalEVm024392t1;Arachis_valida|AravalEVm024933t1;Arachis_valida|AravalEVm021835t1;Arachis_valida|AravalEVm022466t1;Arachis_valida|AravalEVm022655t1;Arachis_valida|AravalEVm024810t1
cluster59	7	D4B1R0	GO:0008237; F:metallopeptidase activity; IEA:UniProtKB-KW	Arachis_valida|AravalEVm005514t1;Arachis_valida|AravalEVm006170t1;Arachis_hypogaea_SunOleic_97R|ArahypEVm002038t2;Arachis_hypogaea_SunOleic_97R|ArahypEVm002038t3;Arachis_hypogaea_SunOleic_97R|ArahypEVm002038t4;Arachis_hypogaea_SunOleic_97R|ArahypEVm002038t5;Arachis_hypogaea_SunOleic_97R|ArahypEVm002038t6
cluster60	7	P36609	GO:0005509; F:calcium ion binding; IEA:InterPro	Arachis_valida|AravalEVm033667t2;Arachis_valida|AravalEVm046262t1;Arachis_valida|AravalEVm034283t1;Arachis_valida|AravalEVm029460t2;Arachis_valida|AravalEVm031949t3;Arachis_valida|AravalEVm033042t1;Arachis_stenosperma|ArasteEVm011250t1
cluster61	7	Q9VDG8	GO:0060439; P:trachea morphogenesis; IMP:FlyBase	Arachis_valida|AravalEVm001155t5;Arachis_valida|AravalEVm000962t4;Arachis_valida|AravalEVm001155t4;Arachis_valida|AravalEVm001249t2;Arachis_valida|AravalEVm002683t1;Arachis_valida|AravalEVm003460t1;Arachis_valida|AravalEVm003229t1
cluster62	7	Q8X0J4	GO:0055114; P:oxidation-reduction process; IEA:UniProtKB-KW	Arachis_valida|AravalEVm085200t1;Arachis_valida|AravalEVm010468t1;Arachis_valida|AravalEVm011831t1;Arachis_valida|AravalEVm013123t1;Arachis_valida|AravalEVm010374t1;Arachis_valida|AravalEVm032860t1;Arachis_valida|AravalEVm037712t2
cluster63	7	Q93YT1	GO:0071230; P:cellular response to amino acid stimulus; ISS:UniProtKB	Arachis_valida|AravalEVm002185t3;Arachis_valida|AravalEVm002185t2;Arachis_valida|AravalEVm002185t4;Arachis_valida|AravalEVm002185t5;Arachis_stenosperma|ArasteEVm001636t5;Arachis_hypogaea_SunOleic_97R|ArahypEVm000651t3;Arachis_stenosperma|ArasteEVm000917t4
cluster64	7	P0CL53	GO:0006069; P:ethanol oxidation; IEA:InterPro	Arachis_valida|AravalEVm017539t1;Arachis_valida|AravalEVm017272t1;Arachis_stenosperma|ArasteEVm011867t1;Arachis_hypogaea_SunOleic_97R|ArahypEVm013104t1;Arachis_hypogaea_SunOleic_97R|ArahypEVm013104t5;Arachis_hypogaea_SunOleic_97R|ArahypEVm013104t8;Arachis_stenosperma|ArasteEVm014071t1
cluster65	7	P09624	GO:0006574; P:valine catabolic process; IMP:SGD	Arachis_valida|AravalEVm009819t1;Arachis_valida|AravalEVm009676t2;Arachis_valida|AravalEVm009895t1;Arachis_valida|AravalEVm009959t2;Arachis_valida|AravalEVm023369t1;Arachis_valida|AravalEVm072716t1;Arachis_valida|AravalEVm033135t1
cluster66	7	Q9CAU3	GO:0019748; P:secondary metabolic process; IBA:GO_Central	Arachis_valida|AravalEVm012029t1;Arachis_valida|AravalEVm012029t3;Valsten1|AravsEVm008356t9;Arachis_stenosperma|ArasteEVm008838t2;Arachis_stenosperma|ArasteEVm008838t3;Arachis_hypogaea_SunOleic_97R|ArahypEVm005937t2;Arachis_hypogaea_SunOleic_97R|ArahypEVm005729t2
cluster67	7	Q9FKY4	GO:0055085; P:transmembrane transport; IEA:InterPro	Arachis_valida|AravalEVm014713t3;Arachis_valida|AravalEVm014713t6;Arachis_valida|AravalEVm015772t1;Arachis_valida|AravalEVm015772t6;Arachis_valida|AravalEVm015772t4;Valsten1|AravsEVm009960t5;Arachis_stenosperma|ArasteEVm010383t5
cluster68	7	P35004	GO:0006508; P:proteolysis; ISM:FlyBase	Arachis_valida|AravalEVm030480t1;Arachis_valida|AravalEVm025820t1;Arachis_valida|AravalEVm027787t1;Arachis_valida|AravalEVm028346t1;Arachis_valida|AravalEVm028421t1;Arachis_valida|AravalEVm028548t1;Arachis_valida|AravalEVm020742t1
cluster69	7	Q27593	GO:0031000; P:response to caffeine; IDA:FlyBase	Arachis_valida|AravalEVm009427t3;Arachis_valida|AravalEVm009427t4;Arachis_valida|AravalEVm009382t1;Arachis_valida|AravalEVm009382t2;Arachis_valida|AravalEVm010174t7;Arachis_valida|AravalEVm010251t1;Arachis_valida|AravalEVm038033t1
cluster70	7	P04323	GO:0015074; P:DNA integration; IEA:InterPro	Arachis_valida|AravalEVm004497t3;Arachis_valida|AravalEVm004497t1;Arachis_valida|AravalEVm009379t1;Arachis_hypogaea_SunOleic_97R|ArahypEVm020514t1;Arachis_stenosperma|ArasteEVm006496t1;Arachis_stenosperma|ArasteEVm008866t1;Arachis_hypogaea_SunOleic_97R|ArahypEVm020514t2
cluster71	7	Q9LFS4	GO:0016032; P:viral process; IEA:UniProtKB-KW	Arachis_valida|AravalEVm004822t1;Arachis_valida|AravalEVm005700t1;Arachis_valida|AravalEVm005700t2;Arachis_hypogaea_Tifguard|ArahypEVm002961t8;Arachis_stenosperma|ArasteEVm003726t2;Arachis_hypogaea_Tifguard|ArahypEVm002961t4;Arachis_stenosperma|ArasteEVm008877t1
cluster72	7	P20178	GO:0009058; P:biosynthetic process; IEA:InterPro	Arachis_valida|AravalEVm016894t1;Arachis_valida|AravalEVm016895t1;Arachis_hypogaea_Tifguard|ArahypEVm009144t1;Arachis_hypogaea_SunOleic_97R|ArahypEVm009152t1;Arachis_hypogaea_Tifguard|ArahypEVm009157t5;Arachis_hypogaea_Tifguard|ArahypEVm009144t5;Arachis_hypogaea_Tifguard|ArahypEVm009152t1
cluster73	7	Q9ZT94	GO:0006310; P:DNA recombination; IEA:UniProtKB-KW	Arachis_valida|AravalEVm026455t2;Arachis_valida|AravalEVm026455t1;Valsten1|AravsEVm006707t1;Arachis_stenosperma|ArasteEVm003552t10;Arachis_hypogaea_Tifguard|ArahypEVm022815t1;Arachis_hypogaea_SunOleic_97R|ArahypEVm024043t1;Arachis_stenosperma|ArasteEVm032142t1
cluster74	7	P26413	GO:0006986; P:response to unfolded protein; IBA:GO_Central	Arachis_valida|AravalEVm005357t1;Arachis_valida|AravalEVm005175t1;Arachis_hypogaea_Tifguard|ArahypEVm001663t1;Arachis_stenosperma|ArasteEVm003747t1;Arachis_stenosperma|ArasteEVm003695t1;Arachis_hypogaea_SunOleic_97R|ArahypEVm001663t1;Valsten1|AravsEVm003488t2
cluster75	7	Q54JE4	GO:0006099; P:tricarboxylic acid cycle; IBA:GO_Central	Arachis_valida|AravalEVm001245t2;Arachis_valida|AravalEVm001245t1;Valsten1|AravsEVm000833t5;Valsten1|AravsEVm000833t2;Valsten1|AravsEVm000833t1;Valsten1|AravsEVm000809t6;Arachis_stenosperma|ArasteEVm003564t3
cluster76	7	Q5AWS6	GO:0030433; P:ubiquitin-dependent ERAD pathway; IBA:GO_Central	Arachis_valida|AravalEVm002664t1;Arachis_valida|AravalEVm002664t2;Arachis_valida|AravalEVm002664t4;Arachis_hypogaea_Tifguard|ArahypEVm006219t1;Arachis_stenosperma|ArasteEVm002101t4;Arachis_hypogaea_SunOleic_97R|ArahypEVm000628t4;Arachis_hypogaea_Tifguard|ArahypEVm000628t14
cluster77	7	B9FSC8	GO:0031408; P:oxylipin biosynthetic process; IEA:UniProtKB-KW	Arachis_valida|AravalEVm017875t5;Arachis_valida|AravalEVm017875t4;Valsten1|AravsEVm012044t6;Arachis_hypogaea_Tifguard|ArahypEVm009520t1;Arachis_stenosperma|ArasteEVm012252t2;Arachis_hypogaea_SunOleic_97R|ArahypEVm009661t2;Arachis_hypogaea_SunOleic_97R|ArahypEVm009520t5
cluster78	7	P87144	GO:0006435; P:threonyl-tRNA aminoacylation; ISS:PomBase	Arachis_valida|AravalEVm003666t1;Arachis_valida|AravalEVm003605t2;Arachis_hypogaea_Tifguard|ArahypEVm002186t5;Arachis_stenosperma|ArasteEVm002293t12;Arachis_hypogaea_SunOleic_97R|ArahypEVm001757t3;Arachis_stenosperma|ArasteEVm003332t4;Arachis_stenosperma|ArasteEVm002293t6
cluster79	7	C0SVV6	GO:0080142; P:regulation of salicylic acid biosynthetic process; IBA:GO_Central	Arachis_valida|AravalEVm019385t1;Arachis_valida|AravalEVm019385t3;Arachis_valida|AravalEVm019385t2;Valsten1|AravsEVm013061t1;Arachis_stenosperma|ArasteEVm004331t3;Arachis_hypogaea_Tifguard|ArahypEVm013118t1;Arachis_hypogaea_SunOleic_97R|ArahypEVm013118t1
cluster80	7	P0C2F6	GO:0004523; F:RNA-DNA hybrid ribonuclease activity; IEA:UniProtKB-EC	Arachis_valida|AravalEVm000861t3;Arachis_valida|AravalEVm000555t3;Arachis_valida|AravalEVm000861t5;Arachis_valida|AravalEVm012074t1;Arachis_valida|AravalEVm022274t2;Arachis_hypogaea_SunOleic_97R|ArahypEVm020375t1;Arachis_stenosperma|ArasteEVm012934t1
cluster81	7	P51819	GO:0006457; P:protein folding; IEA:InterPro	Arachis_valida|AravalEVm004121t1;Arachis_valida|AravalEVm004139t1;Valsten1|AravsEVm002822t1;Valsten1|AravsEVm002813t2;Valsten1|AravsEVm002813t1;Arachis_hypogaea_Tifguard|ArahypEVm003120t1;Arachis_stenosperma|ArasteEVm003136t2
cluster82	7	P93604	GO:0004674; F:protein serine/threonine kinase activity; IEA:UniProtKB-KW	Arachis_valida|AravalEVm006266t4;Arachis_valida|AravalEVm006266t5;Arachis_hypogaea_Tifguard|ArahypEVm002803t1;Arachis_stenosperma|ArasteEVm004564t4;Arachis_hypogaea_SunOleic_97R|ArahypEVm002803t1;Arachis_hypogaea_Tifguard|ArahypEVm003191t2;Arachis_hypogaea_SunOleic_97R|ArahypEVm003191t2
cluster83	7	F4I9E1	GO:0009651; P:response to salt stress; IMP:TAIR	Valsten1|AravsEVm004407t1;Arachis_hypogaea_SunOleic_97R|ArahypEVm003305t2;Arachis_hypogaea_SunOleic_97R|ArahypEVm003305t1;Arachis_hypogaea_Tifguard|ArahypEVm003305t5;Valsten1|AravsEVm004407t4;Arachis_stenosperma|ArasteEVm005589t1;Arachis_valida|AravalEVm008799t2
cluster84	7	Q29449	GO:0045332; P:phospholipid translocation; IBA:GO_Central	Arachis_valida|AravalEVm000698t1;Valsten1|AravsEVm000460t2;Arachis_hypogaea_Tifguard|ArahypEVm000583t1;Arachis_stenosperma|ArasteEVm000562t4;Arachis_hypogaea_SunOleic_97R|ArahypEVm012143t1;Arachis_stenosperma|ArasteEVm001472t2;Arachis_stenosperma|ArasteEVm000451t4
cluster85	7	Q93Z38	GO:0008483; F:transaminase activity; IEA:UniProtKB-KW	Arachis_valida|AravalEVm012793t1;Valsten1|AravsEVm011929t1;Arachis_hypogaea_Tifguard|ArahypEVm006834t6;Arachis_hypogaea_SunOleic_97R|ArahypEVm006834t6;Valsten1|AravsEVm011929t5;Arachis_hypogaea_Tifguard|ArahypEVm006834t1;Arachis_hypogaea_SunOleic_97R|ArahypEVm006834t1
cluster86	7	Q52MZ2	GO:0006351; P:transcription, DNA-templated; IEA:InterPro	Arachis_valida|AravalEVm017627t1;Valsten1|AravsEVm011919t1;Arachis_stenosperma|ArasteEVm012190t1;Arachis_valida|AravalEVm012099t1;Valsten1|AravsEVm008145t2;Arachis_hypogaea_Tifguard|ArahypEVm006257t1;Arachis_hypogaea_SunOleic_97R|ArahypEVm006257t1
cluster87	7	Q84MB3	GO:0016491; F:oxidoreductase activity; IEA:UniProtKB-KW	Arachis_valida|AravalEVm017439t2;Arachis_stenosperma|ArasteEVm005441t2;Arachis_valida|AravalEVm017976t1;Valsten1|AravsEVm012308t6;Arachis_hypogaea_Tifguard|ArahypEVm009673t5;Arachis_hypogaea_SunOleic_97R|ArahypEVm009720t1;Arachis_hypogaea_SunOleic_97R|ArahypEVm009673t5
cluster88	7	P26690	GO:0009813; P:flavonoid biosynthetic process; IEA:UniProtKB-KW	Arachis_valida|AravalEVm022855t4;Arachis_hypogaea_Tifguard|ArahypEVm012619t1;Arachis_hypogaea_SunOleic_97R|ArahypEVm017147t1;Arachis_valida|AravalEVm022855t1;Valsten1|AravsEVm015356t1;Arachis_hypogaea_SunOleic_97R|ArahypEVm012338t1;Arachis_hypogaea_Tifguard|ArahypEVm017147t1
cluster89	7	Q9SA85	GO:0016491; F:oxidoreductase activity; IEA:UniProtKB-KW	Arachis_valida|AravalEVm007003t4;Valsten1|AravsEVm004340t9;Arachis_hypogaea_Tifguard|ArahypEVm003916t2;Arachis_hypogaea_SunOleic_97R|ArahypEVm003916t2;Arachis_valida|AravalEVm008738t1;Valsten1|AravsEVm005378t1;Arachis_stenosperma|ArasteEVm005195t1
cluster90	7	P43309	GO:0046148; P:pigment biosynthetic process; IEA:InterPro	Arachis_valida|AravalEVm007008t1;Valsten1|AravsEVm004742t3;Arachis_hypogaea_Tifguard|ArahypEVm003524t1;Arachis_hypogaea_SunOleic_97R|ArahypEVm003524t1;Valsten1|AravsEVm004742t1;Arachis_hypogaea_Tifguard|ArahypEVm003524t2;Arachis_hypogaea_SunOleic_97R|ArahypEVm003524t2
cluster91	7	Q9FIK1	GO:0016567; P:protein ubiquitination; IEA:UniProtKB-UniPathway	Arachis_valida|AravalEVm006168t1;Valsten1|AravsEVm004372t3;Arachis_hypogaea_Tifguard|ArahypEVm003099t7;Arachis_stenosperma|ArasteEVm003908t2;Arachis_hypogaea_SunOleic_97R|ArahypEVm003099t4;Valsten1|AravsEVm004372t2;Arachis_hypogaea_Tifguard|ArahypEVm003099t8
cluster92	7	P42088	GO:0046872; F:metal ion binding; IEA:UniProtKB-KW	Arachis_valida|AravalEVm040503t1;Valsten1|AravsEVm023217t4;Arachis_hypogaea_Tifguard|ArahypEVm017481t1;Arachis_hypogaea_SunOleic_97R|ArahypEVm023569t1;Arachis_hypogaea_SunOleic_97R|ArahypEVm022700t1;Arachis_hypogaea_Tifguard|ArahypEVm023569t1;Arachis_hypogaea_Tifguard|ArahypEVm022700t1
cluster93	7	Q6Q3H3	GO:0016114; P:terpenoid biosynthetic process; IEA:UniProtKB-UniPathway	Arachis_valida|AravalEVm016036t1;Arachis_hypogaea_Tifguard|ArahypEVm003861t1;Arachis_hypogaea_SunOleic_97R|ArahypEVm003861t1;Arachis_valida|AravalEVm007613t8;Valsten1|AravsEVm007835t5;Arachis_stenosperma|ArasteEVm005075t6;Arachis_stenosperma|ArasteEVm005075t5
cluster94	7	Q8VZG8	GO:0046777; P:protein autophosphorylation; IBA:GO_Central	Arachis_valida|AravalEVm001801t1;Arachis_hypogaea_Tifguard|ArahypEVm000747t2;Arachis_stenosperma|ArasteEVm010950t2;Arachis_hypogaea_SunOleic_97R|ArahypEVm000747t1;Arachis_valida|AravalEVm002524t2;Valsten1|AravsEVm009617t2;Arachis_hypogaea_SunOleic_97R|ArahypEVm000747t2
cluster95	7	Q9FIL7	GO:0009651; P:response to salt stress; IEP:UniProtKB	Arachis_valida|AravalEVm012361t2;Valsten1|AravsEVm010375t2;Arachis_hypogaea_Tifguard|ArahypEVm006880t4;Arachis_stenosperma|ArasteEVm009470t2;Arachis_hypogaea_SunOleic_97R|ArahypEVm006880t4;Arachis_hypogaea_Tifguard|ArahypEVm006880t2;Arachis_hypogaea_SunOleic_97R|ArahypEVm006880t2
cluster96	7	Q9M9Q6	GO:0004185; F:serine-type carboxypeptidase activity; IEA:InterPro	Arachis_valida|AravalEVm012914t1;Valsten1|AravsEVm008748t3;Arachis_hypogaea_Tifguard|ArahypEVm007018t4;Arachis_stenosperma|ArasteEVm009110t2;Arachis_hypogaea_SunOleic_97R|ArahypEVm006938t2;Valsten1|AravsEVm008748t1;Arachis_hypogaea_SunOleic_97R|ArahypEVm007018t3
cluster97	7	Q9M2L4	GO:0043069; P:negative regulation of programmed cell death; IGI:TAIR	Arachis_valida|AravalEVm001141t1;Valsten1|AravsEVm004837t2;Arachis_hypogaea_Tifguard|ArahypEVm001729t2;Arachis_stenosperma|ArasteEVm000860t3;Arachis_hypogaea_SunOleic_97R|ArahypEVm001729t2;Arachis_hypogaea_SunOleic_97R|ArahypEVm002729t2;Arachis_hypogaea_Tifguard|ArahypEVm002729t3
cluster98	7	E9L7A5	GO:0009094; P:L-phenylalanine biosynthetic process; IEA:UniProtKB-UniPathway	Arachis_valida|AravalEVm014787t5;Valsten1|AravsEVm009970t3;Arachis_valida|AravalEVm014787t1;Arachis_hypogaea_Tifguard|ArahypEVm019750t1;Arachis_stenosperma|ArasteEVm010310t1;Arachis_hypogaea_SunOleic_97R|ArahypEVm019750t1;Arachis_stenosperma|ArasteEVm010310t2
cluster99	7	Q67XZ3	GO:0005975; P:carbohydrate metabolic process; IEA:InterPro	Arachis_valida|AravalEVm007339t1;Valsten1|AravsEVm010232t1;Arachis_hypogaea_Tifguard|ArahypEVm003751t2;Arachis_stenosperma|ArasteEVm004881t1;Arachis_hypogaea_SunOleic_97R|ArahypEVm003751t2;Arachis_hypogaea_Tifguard|ArahypEVm003460t1;Arachis_hypogaea_SunOleic_97R|ArahypEVm003460t2
cluster100	7	Q94A27	GO:0007033; P:vacuole organization; IEA:InterPro	Arachis_valida|AravalEVm002794t3;Valsten1|AravsEVm001891t3;Arachis_stenosperma|ArasteEVm001863t2;Arachis_hypogaea_SunOleic_97R|ArahypEVm010692t2;Arachis_stenosperma|ArasteEVm001863t1;Arachis_hypogaea_SunOleic_97R|ArahypEVm003192t3;Arachis_hypogaea_SunOleic_97R|ArahypEVm003192t1
cluster101	7	Q8LB88	GO:0009789; P:positive regulation of abscisic acid-activated signaling pathway; IMP:UniProtKB	Arachis_hypogaea_Tifguard|ArahypEVm006464t7;Arachis_hypogaea_Tifguard|ArahypEVm006464t1;Arachis_hypogaea_Tifguard|ArahypEVm006464t2;Arachis_hypogaea_Tifguard|ArahypEVm006464t4;Arachis_hypogaea_Tifguard|ArahypEVm006464t5;Arachis_stenosperma|ArasteEVm019965t8;Arachis_hypogaea_SunOleic_97R|ArahypEVm007148t4
cluster102	7	Q40392	GO:0007165; P:signal transduction; IEA:InterPro	Arachis_stenosperma|ArasteEVm000201t14;Arachis_stenosperma|ArasteEVm000201t13;Arachis_stenosperma|ArasteEVm000201t6;Arachis_stenosperma|ArasteEVm000201t9;Arachis_stenosperma|ArasteEVm006730t1;Arachis_hypogaea_Tifguard|ArahypEVm000586t3;Arachis_hypogaea_SunOleic_97R|ArahypEVm000586t3
cluster103	7	P04323	GO:0015074; P:DNA integration; IEA:InterPro	Arachis_stenosperma|ArasteEVm010898t1;Arachis_stenosperma|ArasteEVm002361t2;Arachis_stenosperma|ArasteEVm000261t3;Arachis_stenosperma|ArasteEVm000261t2;Arachis_hypogaea_Tifguard|ArahypEVm015692t1;Arachis_hypogaea_SunOleic_97R|ArahypEVm015692t1;Arachis_valida|AravalEVm003189t3
cluster104	7	Q9ZNZ7	GO:0009744; P:response to sucrose; IEP:UniProtKB	Arachis_stenosperma|ArasteEVm000176t14;Arachis_stenosperma|ArasteEVm000176t2;Arachis_stenosperma|ArasteEVm000176t5;Arachis_hypogaea_SunOleic_97R|ArahypEVm000209t8;Arachis_hypogaea_SunOleic_97R|ArahypEVm000209t1;Arachis_hypogaea_Tifguard|ArahypEVm000209t4;Arachis_hypogaea_SunOleic_97R|ArahypEVm000209t9
cluster105	7	Q9LPF1	GO:0006865; P:amino acid transport; IDA:TAIR	Arachis_hypogaea_SunOleic_97R|ArahypEVm009227t2;Arachis_hypogaea_SunOleic_97R|ArahypEVm009227t1;Valsten1|AravsEVm010872t2;Arachis_hypogaea_Tifguard|ArahypEVm009603t2;Arachis_stenosperma|ArasteEVm010823t1;Arachis_valida|AravalEVm018973t1;Arachis_hypogaea_SunOleic_97R|ArahypEVm010129t1
cluster106	7	Q93ZB9	GO:0010025; P:wax biosynthetic process; IMP:TAIR	Valsten1|AravsEVm007062t4;Arachis_hypogaea_Tifguard|ArahypEVm010816t2;Arachis_hypogaea_SunOleic_97R|ArahypEVm005505t1;Arachis_valida|AravalEVm008877t2;Arachis_hypogaea_SunOleic_97R|ArahypEVm010816t2;Arachis_hypogaea_Tifguard|ArahypEVm005596t1;Arachis_hypogaea_SunOleic_97R|ArahypEVm005596t1
cluster107	6	Q7Z8P9	GO:0006228; P:UTP biosynthetic process; IEA:InterPro	Arachis_valida|AravalEVm040050t3;Arachis_valida|AravalEVm027802t1;Arachis_valida|AravalEVm035692t1;Arachis_valida|AravalEVm040050t2;Arachis_valida|AravalEVm040050t6;Arachis_valida|AravalEVm052980t2
cluster108	6	A1D2C9	GO:0051403; P:stress-activated MAPK cascade; IEA:InterPro	Arachis_valida|AravalEVm018594t1;Arachis_valida|AravalEVm014692t1;Arachis_valida|AravalEVm017570t1;Arachis_valida|AravalEVm018496t1;Arachis_valida|AravalEVm019479t1;Arachis_valida|AravalEVm019479t3
cluster109	6	P23378	GO:0036255; P:response to methylamine; ISS:UniProtKB	Arachis_valida|AravalEVm001337t2;Arachis_valida|AravalEVm001337t1;Arachis_valida|AravalEVm006451t1;Arachis_valida|AravalEVm012345t1;Arachis_valida|AravalEVm012345t2;Arachis_valida|AravalEVm019140t1
cluster110	6	A8PDE3	GO:0019427; P:acetyl-CoA biosynthetic process from acetate; IEA:InterPro	Arachis_valida|AravalEVm004913t3;Arachis_valida|AravalEVm003725t2;Arachis_valida|AravalEVm004913t1;Arachis_valida|AravalEVm005628t1;Arachis_valida|AravalEVm022425t1;Arachis_valida|AravalEVm026164t1
cluster111	6	A0A1P8ATR9	GO:0005886; C:plasma membrane; IEA:UniProtKB-SubCell	Arachis_valida|AravalEVm005164t4;Arachis_valida|AravalEVm005164t1;Arachis_hypogaea_Tifguard|ArahypEVm016167t2;Arachis_hypogaea_SunOleic_97R|ArahypEVm016167t2;Arachis_hypogaea_Tifguard|ArahypEVm001152t3;Arachis_hypogaea_SunOleic_97R|ArahypEVm003779t2
cluster112	6	Q5BAU9	GO:0045490; P:pectin catabolic process; IDA:UniProtKB	Arachis_valida|AravalEVm035496t4;Arachis_valida|AravalEVm037148t1;Arachis_valida|AravalEVm017857t1;Arachis_valida|AravalEVm010954t1;Arachis_valida|AravalEVm017944t1;Arachis_valida|AravalEVm026603t2
cluster113	6	Q7S5N8	GO:0046653; P:tetrahydrofolate metabolic process; IBA:GO_Central	Arachis_valida|AravalEVm009084t1;Arachis_valida|AravalEVm008946t3;Arachis_valida|AravalEVm009444t1;Arachis_hypogaea_SunOleic_97R|ArahypEVm005202t5;Arachis_stenosperma|ArasteEVm006601t4;Arachis_stenosperma|ArasteEVm006601t5
cluster114	6	Q9GRW0	GO:0045087; P:innate immune response; IEA:UniProtKB-KW	Arachis_valida|AravalEVm014088t1;Arachis_valida|AravalEVm008325t2;Arachis_valida|AravalEVm014663t1;Arachis_valida|AravalEVm027656t1;Arachis_valida|AravalEVm020438t1;Valsten1|AravsEVm004447t1
cluster115	6	O74752	GO:0009408; P:response to heat; IEA:InterPro	Arachis_valida|AravalEVm014905t1;Arachis_valida|AravalEVm013966t2;Arachis_valida|AravalEVm014723t3;Arachis_valida|AravalEVm015237t1;Arachis_valida|AravalEVm021487t1;Arachis_stenosperma|ArasteEVm010450t2
cluster116	6	O82500	GO:0007165; P:signal transduction; IEA:InterPro	Arachis_valida|AravalEVm000805t3;Arachis_valida|AravalEVm000805t2;Arachis_valida|AravalEVm000805t5;Arachis_valida|AravalEVm000805t4;Arachis_hypogaea_Tifguard|ArahypEVm000243t1;Arachis_stenosperma|ArasteEVm000500t1
cluster117	6	O14104	GO:0019878; P:lysine biosynthetic process via aminoadipic acid; IEA:UniProtKB-UniPathway	Arachis_valida|AravalEVm019135t1;Arachis_valida|AravalEVm018388t1;Arachis_valida|AravalEVm018756t1;Arachis_valida|AravalEVm019643t3;Arachis_valida|AravalEVm019721t1;Arachis_valida|AravalEVm027746t1
cluster118	6	Q6DBP4	GO:0071555; P:cell wall organization; IBA:GO_Central	Arachis_valida|AravalEVm013986t3;Arachis_valida|AravalEVm011121t2;Arachis_valida|AravalEVm011121t3;Arachis_valida|AravalEVm015166t1;Arachis_valida|AravalEVm015166t3;Arachis_valida|AravalEVm016560t3
cluster119	6	Q9P4R4	GO:0019878; P:lysine biosynthetic process via aminoadipic acid; IEA:UniProtKB-UniPathway	Arachis_valida|AravalEVm013072t1;Arachis_valida|AravalEVm001097t1;Arachis_valida|AravalEVm001097t2;Arachis_valida|AravalEVm001097t3;Arachis_valida|AravalEVm001565t1;Arachis_valida|AravalEVm013012t1
cluster120	6	P53535	GO:0005975; P:carbohydrate metabolic process; IEA:UniProtKB-KW	Arachis_valida|AravalEVm003563t5;Arachis_valida|AravalEVm002418t1;Arachis_valida|AravalEVm003563t1;Arachis_valida|AravalEVm003563t3;Arachis_valida|AravalEVm003563t6;Arachis_valida|AravalEVm020089t2
cluster121	6	Q9LVD9	GO:0006855; P:drug transmembrane transport; IBA:GO_Central	Arachis_valida|AravalEVm009307t1;Arachis_valida|AravalEVm009307t3;Arachis_valida|AravalEVm009307t4;Arachis_hypogaea_SunOleic_97R|ArahypEVm008637t2;Valsten1|AravsEVm007116t4;Arachis_hypogaea_SunOleic_97R|ArahypEVm008637t5
cluster122	6	P18173	GO:0046693; P:sperm storage; IMP:FlyBase	Arachis_valida|AravalEVm037565t1;Arachis_valida|AravalEVm008384t1;Arachis_valida|AravalEVm025681t1;Arachis_valida|AravalEVm037749t1;Arachis_valida|AravalEVm005310t1;Arachis_valida|AravalEVm006689t1
cluster123	6	O44390	GO:0006633; P:fatty acid biosynthetic process; IEA:UniProtKB-KW	Arachis_valida|AravalEVm017493t2;Arachis_valida|AravalEVm017493t1;Arachis_valida|AravalEVm017493t3;Arachis_valida|AravalEVm019484t1;Arachis_valida|AravalEVm020782t2;Arachis_valida|AravalEVm025566t1
cluster124	6	P46423	GO:0009734; P:auxin-activated signaling pathway; IEA:UniProtKB-KW	Arachis_valida|AravalEVm037639t2;Arachis_valida|AravalEVm037627t1;Arachis_valida|AravalEVm037627t2;Arachis_hypogaea_Tifguard|ArahypEVm018856t2;Arachis_hypogaea_SunOleic_97R|ArahypEVm019041t2;Arachis_hypogaea_Tifguard|ArahypEVm018856t4
cluster125	6	Q9M2E2	GO:0055114; P:oxidation-reduction process; IBA:GO_Central	Arachis_valida|AravalEVm025840t4;Arachis_valida|AravalEVm026971t1;Arachis_hypogaea_Tifguard|ArahypEVm014214t2;Arachis_hypogaea_SunOleic_97R|ArahypEVm013514t3;Arachis_hypogaea_SunOleic_97R|ArahypEVm038308t1;Arachis_hypogaea_SunOleic_97R|ArahypEVm014214t2
cluster126	6	Q9SGA8	GO:0008194; F:UDP-glycosyltransferase activity; IBA:GO_Central	Arachis_valida|AravalEVm012857t1;Arachis_valida|AravalEVm013274t1;Valsten1|AravsEVm014527t3;Valsten1|AravsEVm020112t2;Valsten1|AravsEVm020112t1;Arachis_hypogaea_SunOleic_97R|ArahypEVm019460t8
cluster127	6	Q9MAJ7	GO:0005975; P:carbohydrate metabolic process; IEA:InterPro	Arachis_valida|AravalEVm003794t1;Arachis_valida|AravalEVm001383t1;Arachis_valida|AravalEVm009855t1;Valsten1|AravsEVm001602t2;Arachis_stenosperma|ArasteEVm002869t5;Arachis_hypogaea_SunOleic_97R|ArahypEVm000965t2
cluster128	6	P08157	GO:0006567; P:threonine catabolic process; IMP:AspGD	Arachis_valida|AravalEVm010470t1;Arachis_valida|AravalEVm010650t1;Arachis_hypogaea_SunOleic_97R|ArahypEVm004915t4;Valsten1|AravsEVm006924t2;Arachis_stenosperma|ArasteEVm007670t1;Arachis_hypogaea_SunOleic_97R|ArahypEVm011132t6
cluster129	6	Q869Z0	GO:0045454; P:cell redox homeostasis; IEA:InterPro	Arachis_valida|AravalEVm012304t1;Arachis_valida|AravalEVm009675t1;Arachis_valida|AravalEVm009675t2;Arachis_valida|AravalEVm018477t1;Arachis_valida|AravalEVm054829t1;Arachis_valida|AravalEVm008954t1
cluster130	6	P16662	GO:0006629; P:lipid metabolic process; TAS:ProtInc	Arachis_valida|AravalEVm008382t1;Arachis_valida|AravalEVm007413t1;Arachis_valida|AravalEVm008441t1;Arachis_valida|AravalEVm008441t2;Arachis_valida|AravalEVm009002t1;Arachis_valida|AravalEVm010028t4
cluster131	6	P39958	GO:0016192; P:vesicle-mediated transport; IMP:SGD	Arachis_valida|AravalEVm012145t3;Arachis_valida|AravalEVm011949t1;Arachis_valida|AravalEVm011949t2;Arachis_valida|AravalEVm013304t2;Arachis_hypogaea_Tifguard|ArahypEVm013921t2;Arachis_hypogaea_SunOleic_97R|ArahypEVm013921t2
cluster132	6	N/A	N/A	Arachis_valida|AravalEVm010268t4;Arachis_valida|AravalEVm010268t1;Arachis_valida|AravalEVm010268t6;Valsten1|AravsEVm011334t5;Valsten1|AravsEVm011334t4;Valsten1|AravsEVm011334t2
cluster133	6	A1L3X0	GO:0042761; P:very long-chain fatty acid biosynthetic process; IDA:UniProtKB	Arachis_valida|AravalEVm028474t1;Arachis_valida|AravalEVm022124t1;Arachis_valida|AravalEVm022758t1;Arachis_valida|AravalEVm028202t1;Arachis_valida|AravalEVm029174t1;Arachis_stenosperma|ArasteEVm027868t1
cluster134	6	Q9FXF2	GO:0046777; P:protein autophosphorylation; IBA:GO_Central	Arachis_valida|AravalEVm003073t2;Arachis_valida|AravalEVm001330t1;Arachis_valida|AravalEVm001330t2;Arachis_valida|AravalEVm003073t1;Arachis_valida|AravalEVm001330t6;Valsten1|AravsEVm000896t3
cluster135	6	Q0WPE9	GO:0022857; F:transmembrane transporter activity; IEA:InterPro	Arachis_valida|AravalEVm008688t6;Arachis_valida|AravalEVm008688t5;Arachis_stenosperma|ArasteEVm005697t4;Arachis_hypogaea_SunOleic_97R|ArahypEVm016911t1;Arachis_hypogaea_SunOleic_97R|ArahypEVm016911t4;Arachis_hypogaea_SunOleic_97R|ArahypEVm016911t3
cluster136	6	O44104	GO:0006096; P:glycolytic process; IEA:UniProtKB-UniPathway	Arachis_valida|AravalEVm021307t7;Arachis_valida|AravalEVm021307t1;Arachis_valida|AravalEVm021307t3;Arachis_valida|AravalEVm021307t5;Arachis_hypogaea_Tifguard|ArahypEVm012229t1;Arachis_stenosperma|ArasteEVm010482t2
cluster137	6	Q940V3	GO:0008194; F:UDP-glycosyltransferase activity; IBA:GO_Central	Arachis_valida|AravalEVm010757t1;Arachis_valida|AravalEVm011503t1;Arachis_valida|AravalEVm012292t1;Arachis_hypogaea_Tifguard|ArahypEVm005967t2;Arachis_hypogaea_SunOleic_97R|ArahypEVm005967t2;Arachis_stenosperma|ArasteEVm006693t1
cluster138	6	P36586	GO:0007264; P:small GTPase mediated signal transduction; IC:PomBase	Arachis_valida|AravalEVm030386t1;Arachis_valida|AravalEVm030372t1;Arachis_valida|AravalEVm032720t3;Arachis_valida|AravalEVm038639t1;Arachis_valida|AravalEVm044589t2;Arachis_hypogaea_SunOleic_97R|ArahypEVm020087t7
cluster139	6	Q9SLN1	N/A	Arachis_valida|AravalEVm000983t5;Arachis_valida|AravalEVm000983t1;Arachis_valida|AravalEVm000983t3;Valsten1|AravsEVm000665t4;Valsten1|AravsEVm000665t2;Arachis_stenosperma|ArasteEVm000750t1
cluster140	6	P12785	GO:0030223; P:neutrophil differentiation; IEA:Ensembl	Arachis_valida|AravalEVm000044t2;Arachis_valida|AravalEVm000036t1;Arachis_valida|AravalEVm000036t2;Arachis_valida|AravalEVm000044t1;Arachis_valida|AravalEVm002940t1;Arachis_stenosperma|ArasteEVm003793t2
cluster141	6	Q9ZQG9	GO:0006952; P:defense response; IEA:UniProtKB-KW	Arachis_valida|AravalEVm014766t2;Arachis_valida|AravalEVm016150t1;Arachis_hypogaea_Tifguard|ArahypEVm009070t2;Arachis_stenosperma|ArasteEVm011124t3;Arachis_hypogaea_SunOleic_97R|ArahypEVm006613t2;Arachis_hypogaea_Tifguard|ArahypEVm006613t2
cluster142	6	Q9ZQ95	GO:0051555; P:flavonol biosynthetic process; IDA:TAIR	Arachis_valida|AravalEVm010357t10;Arachis_valida|AravalEVm010357t4;Arachis_hypogaea_Tifguard|ArahypEVm007716t1;Arachis_stenosperma|ArasteEVm007401t1;Arachis_hypogaea_SunOleic_97R|ArahypEVm005471t14;Arachis_hypogaea_Tifguard|ArahypEVm005614t1
cluster143	6	Q84XG9	GO:0016787; F:hydrolase activity; IEA:UniProtKB-KW	Arachis_valida|AravalEVm015774t7;Arachis_valida|AravalEVm015774t6;Arachis_stenosperma|ArasteEVm009436t4;Arachis_hypogaea_Tifguard|ArahypEVm007041t2;Arachis_hypogaea_SunOleic_97R|ArahypEVm007292t8;Arachis_hypogaea_SunOleic_97R|ArahypEVm007041t2
cluster144	6	Q03091	GO:0004518; F:nuclease activity; IEA:UniProtKB-KW	Arachis_valida|AravalEVm016251t4;Arachis_valida|AravalEVm016251t2;Valsten1|AravsEVm011565t2;Arachis_stenosperma|ArasteEVm019079t1;Arachis_hypogaea_SunOleic_97R|ArahypEVm008790t10;Arachis_stenosperma|ArasteEVm019079t6
cluster145	6	Q9SFC7	GO:0008284; P:positive regulation of cell proliferation; IMP:TAIR	Arachis_valida|AravalEVm013163t1;Arachis_valida|AravalEVm013064t4;Arachis_stenosperma|ArasteEVm010924t2;Arachis_hypogaea_SunOleic_97R|ArahypEVm009797t2;Arachis_hypogaea_SunOleic_97R|ArahypEVm009797t1;Valsten1|AravsEVm018122t2
cluster146	6	O04887	GO:0045490; P:pectin catabolic process; IEA:UniProtKB-UniPathway	Arachis_valida|AravalEVm009394t4;Arachis_valida|AravalEVm009394t1;Arachis_hypogaea_SunOleic_97R|ArahypEVm007754t1;Valsten1|AravsEVm006431t1;Arachis_hypogaea_SunOleic_97R|ArahypEVm018660t1;Valsten1|AravsEVm011916t4
cluster147	6	N/A	N/A	Arachis_valida|AravalEVm008478t1;Arachis_valida|AravalEVm008478t2;Arachis_hypogaea_Tifguard|ArahypEVm004786t2;Valsten1|AravsEVm005689t6;Arachis_hypogaea_SunOleic_97R|ArahypEVm004786t1;Arachis_hypogaea_SunOleic_97R|ArahypEVm004786t2
cluster148	6	Q9FYA2	GO:0032107; P:regulation of response to nutrient levels; IMP:TAIR	Arachis_valida|AravalEVm039657t1;Valsten1|AravsEVm037076t2;Arachis_hypogaea_Tifguard|ArahypEVm019651t1;Arachis_hypogaea_SunOleic_97R|ArahypEVm019651t1;Arachis_hypogaea_Tifguard|ArahypEVm019651t2;Arachis_hypogaea_SunOleic_97R|ArahypEVm019651t2
cluster149	6	P13188	GO:0006425; P:glutaminyl-tRNA aminoacylation; IMP:SGD	Arachis_valida|AravalEVm015200t1;Arachis_hypogaea_Tifguard|ArahypEVm001298t3;Arachis_valida|AravalEVm006552t1;Arachis_stenosperma|ArasteEVm000219t1;Arachis_valida|AravalEVm030180t1;Arachis_hypogaea_SunOleic_97R|ArahypEVm001298t6
cluster150	6	Q9C5D3	GO:0030001; P:metal ion transport; IEA:InterPro	Arachis_valida|AravalEVm019249t1;Arachis_hypogaea_Tifguard|ArahypEVm014559t13;Arachis_stenosperma|ArasteEVm017565t2;Arachis_hypogaea_SunOleic_97R|ArahypEVm014559t13;Arachis_hypogaea_Tifguard|ArahypEVm014559t5;Arachis_hypogaea_SunOleic_97R|ArahypEVm014559t1
cluster151	6	O22820	GO:0008194; F:UDP-glycosyltransferase activity; IBA:GO_Central	Arachis_hypogaea_SunOleic_97R|ArahypEVm006319t1;Arachis_valida|AravalEVm023126t1;Valsten1|AravsEVm006299t2;Arachis_hypogaea_SunOleic_97R|ArahypEVm006319t2;Arachis_hypogaea_Tifguard|ArahypEVm004881t6;Arachis_stenosperma|ArasteEVm008309t7
cluster152	6	Q940J9	GO:0008168; F:methyltransferase activity; IEA:UniProtKB-KW	Arachis_valida|AravalEVm005829t2;Valsten1|AravsEVm003967t3;Arachis_valida|AravalEVm004923t2;Arachis_hypogaea_Tifguard|ArahypEVm002443t6;Arachis_stenosperma|ArasteEVm004524t4;Arachis_hypogaea_SunOleic_97R|ArahypEVm002513t7
cluster153	6	K7K424	GO:0019432; P:triglyceride biosynthetic process; IDA:UniProtKB	Arachis_valida|AravalEVm022516t1;Valsten1|AravsEVm015158t1;Arachis_hypogaea_Tifguard|ArahypEVm011764t5;Arachis_hypogaea_SunOleic_97R|ArahypEVm012156t6;Arachis_hypogaea_SunOleic_97R|ArahypEVm012156t5;Arachis_hypogaea_SunOleic_97R|ArahypEVm012156t3
cluster154	6	Q9LHE3	GO:0006508; P:proteolysis; IBA:GO_Central	Arachis_valida|AravalEVm010754t1;Arachis_hypogaea_SunOleic_97R|ArahypEVm004115t1;Valsten1|AravsEVm008758t2;Valsten1|AravsEVm008758t1;Arachis_hypogaea_SunOleic_97R|ArahypEVm004115t3;Arachis_valida|AravalEVm013336t1
cluster155	6	Q9M276	GO:0009414; P:response to water deprivation; IEP:TAIR	Arachis_valida|AravalEVm030400t1;Valsten1|AravsEVm021579t2;Arachis_stenosperma|ArasteEVm024312t1;Arachis_hypogaea_SunOleic_97R|ArahypEVm011420t3;Valsten1|AravsEVm021579t1;Valsten1|AravsEVm021579t3
cluster156	6	Q94A08	GO:0006979; P:response to oxidative stress; IEP:TAIR	Arachis_valida|AravalEVm003269t8;Arachis_hypogaea_SunOleic_97R|ArahypEVm023587t1;Arachis_valida|AravalEVm003269t2;Arachis_stenosperma|ArasteEVm002567t3;Arachis_stenosperma|ArasteEVm002567t4;Valsten1|AravsEVm002719t1
cluster157	6	P0C5E2	GO:0048573; P:photoperiodism, flowering; IMP:TAIR	Arachis_valida|AravalEVm005171t1;Arachis_hypogaea_Tifguard|ArahypEVm002475t4;Arachis_stenosperma|ArasteEVm003736t2;Arachis_hypogaea_SunOleic_97R|ArahypEVm002475t4;Arachis_hypogaea_Tifguard|ArahypEVm014018t2;Arachis_hypogaea_SunOleic_97R|ArahypEVm014018t2
cluster158	6	Q9SGH6	GO:0009627; P:systemic acquired resistance; IMP:UniProtKB	Arachis_valida|AravalEVm005348t4;Arachis_hypogaea_SunOleic_97R|ArahypEVm002624t19;Arachis_valida|AravalEVm005348t3;Valsten1|AravsEVm047492t3;Arachis_valida|AravalEVm005348t2;Arachis_hypogaea_Tifguard|ArahypEVm002624t15
cluster159	6	Q6ESZ9	GO:0019752; P:carboxylic acid metabolic process; IEA:InterPro	Arachis_valida|AravalEVm011466t2;Valsten1|AravsEVm007727t5;Arachis_hypogaea_SunOleic_97R|ArahypEVm007259t1;Arachis_valida|AravalEVm025190t4;Valsten1|AravsEVm009148t4;Arachis_hypogaea_SunOleic_97R|ArahypEVm007360t1
cluster160	6	Q8RXK7	GO:0009620; P:response to fungus; IEP:TAIR	Arachis_valida|AravalEVm015608t1;Arachis_hypogaea_Tifguard|ArahypEVm002762t2;Arachis_stenosperma|ArasteEVm004475t3;Arachis_hypogaea_SunOleic_97R|ArahypEVm002762t2;Arachis_hypogaea_Tifguard|ArahypEVm002762t1;Arachis_hypogaea_SunOleic_97R|ArahypEVm002762t1
cluster161	6	Q9SW11	GO:0004842; F:ubiquitin-protein transferase activity; IEA:InterPro	Arachis_valida|AravalEVm002833t2;Arachis_stenosperma|ArasteEVm004549t3;Arachis_hypogaea_SunOleic_97R|ArahypEVm000963t2;Arachis_hypogaea_SunOleic_97R|ArahypEVm001336t4;Arachis_stenosperma|ArasteEVm004549t6;Arachis_hypogaea_SunOleic_97R|ArahypEVm001336t5
cluster162	6	Q9LFP7	GO:0006952; P:defense response; IEA:UniProtKB-KW	Arachis_valida|AravalEVm014147t2;Arachis_hypogaea_Tifguard|ArahypEVm008222t1;Arachis_stenosperma|ArasteEVm009886t4;Arachis_hypogaea_SunOleic_97R|ArahypEVm008222t1;Arachis_hypogaea_Tifguard|ArahypEVm007693t6;Arachis_hypogaea_SunOleic_97R|ArahypEVm007693t4
cluster163	6	F4HQ17	GO:0004674; F:protein serine/threonine kinase activity; IEA:UniProtKB-KW	Arachis_valida|AravalEVm011954t2;Arachis_hypogaea_Tifguard|ArahypEVm001968t5;Arachis_hypogaea_SunOleic_97R|ArahypEVm001968t5;Arachis_hypogaea_SunOleic_97R|ArahypEVm001968t3;Arachis_valida|AravalEVm011954t1;Arachis_hypogaea_SunOleic_97R|ArahypEVm001968t6
cluster164	6	Q26487	GO:0003746; F:translation elongation factor activity; IEA:UniProtKB-KW	Arachis_valida|AravalEVm024658t1;Arachis_stenosperma|ArasteEVm008640t5;Arachis_valida|AravalEVm013147t5;Arachis_stenosperma|ArasteEVm008640t6;Arachis_valida|AravalEVm024710t1;Arachis_stenosperma|ArasteEVm008640t2
cluster165	6	Q8HXQ5	GO:0042908; P:xenobiotic transport; IBA:GO_Central	Arachis_valida|AravalEVm000711t1;Arachis_stenosperma|ArasteEVm000177t2;Arachis_hypogaea_SunOleic_97R|ArahypEVm000068t6;Arachis_stenosperma|ArasteEVm000177t1;Arachis_stenosperma|ArasteEVm000177t12;Arachis_stenosperma|ArasteEVm000177t5
cluster166	6	Q7GB25	GO:0055085; P:transmembrane transport; IBA:GO_Central	Valsten1|AravsEVm000168t2;Arachis_valida|AravalEVm016725t1;Arachis_hypogaea_Tifguard|ArahypEVm000068t5;Arachis_hypogaea_Tifguard|ArahypEVm000068t10;Arachis_hypogaea_Tifguard|ArahypEVm000068t3;Arachis_hypogaea_SunOleic_97R|ArahypEVm000068t3
cluster167	6	Q9XI90	GO:0009751; P:response to salicylic acid; IDA:UniProtKB	Arachis_valida|AravalEVm015033t5;Arachis_hypogaea_Tifguard|ArahypEVm003657t2;Arachis_stenosperma|ArasteEVm005189t8;Arachis_hypogaea_SunOleic_97R|ArahypEVm007008t2;Arachis_stenosperma|ArasteEVm007117t1;Arachis_hypogaea_SunOleic_97R|ArahypEVm007008t1
cluster168	6	Q8GXC7	N/A	Arachis_valida|AravalEVm016970t2;Arachis_hypogaea_SunOleic_97R|ArahypEVm004629t4;Arachis_valida|AravalEVm014083t2;Arachis_hypogaea_SunOleic_97R|ArahypEVm006195t1;Arachis_hypogaea_SunOleic_97R|ArahypEVm004629t2;Arachis_hypogaea_SunOleic_97R|ArahypEVm009276t1
cluster169	6	Q5ZLV4	GO:0030488; P:tRNA methylation; IBA:GO_Central	Arachis_valida|AravalEVm021471t1;Valsten1|AravsEVm003915t4;Arachis_valida|AravalEVm008739t2;Valsten1|AravsEVm007618t4;Arachis_stenosperma|ArasteEVm004016t2;Arachis_hypogaea_SunOleic_97R|ArahypEVm006664t2
cluster170	6	Q94CH6	GO:0016042; P:lipid catabolic process; IEA:UniProtKB-KW	Arachis_valida|AravalEVm018688t1;Arachis_hypogaea_Tifguard|ArahypEVm010113t1;Arachis_stenosperma|ArasteEVm013083t2;Arachis_hypogaea_SunOleic_97R|ArahypEVm010113t1;Arachis_valida|AravalEVm018817t1;Valsten1|AravsEVm012701t1
cluster171	6	Q3EBC8	GO:0051214; P:RNA virus induced gene silencing; IGI:TAIR	Valsten1|AravsEVm001093t2;Arachis_stenosperma|ArasteEVm001224t3;Arachis_stenosperma|ArasteEVm001224t2;Arachis_hypogaea_Tifguard|ArahypEVm001603t2;Arachis_hypogaea_SunOleic_97R|ArahypEVm001603t2;Arachis_hypogaea_Tifguard|ArahypEVm002486t6
cluster172	6	B1B5P4	GO:0004659; F:prenyltransferase activity; IDA:UniProtKB	Arachis_valida|AravalEVm015093t1;Arachis_stenosperma|ArasteEVm009923t7;Arachis_valida|AravalEVm016457t1;Arachis_hypogaea_Tifguard|ArahypEVm008523t1;Arachis_hypogaea_SunOleic_97R|ArahypEVm008919t1;Arachis_hypogaea_SunOleic_97R|ArahypEVm008523t1
cluster173	6	Q94B38	GO:0035436; P:triose phosphate transmembrane transport; IDA:UniProtKB	Arachis_valida|AravalEVm017270t2;Arachis_hypogaea_Tifguard|ArahypEVm008582t4;Arachis_stenosperma|ArasteEVm010513t5;Arachis_hypogaea_SunOleic_97R|ArahypEVm009262t2;Arachis_hypogaea_SunOleic_97R|ArahypEVm008582t4;Arachis_hypogaea_SunOleic_97R|ArahypEVm008576t2
cluster174	6	O81831	GO:0080167; P:response to karrikin; IEP:TAIR	Arachis_valida|AravalEVm055234t5;Valsten1|AravsEVm040002t8;Arachis_hypogaea_Tifguard|ArahypEVm032361t3;Arachis_hypogaea_SunOleic_97R|ArahypEVm031806t3;Arachis_hypogaea_SunOleic_97R|ArahypEVm031806t1;Valsten1|AravsEVm040002t3
cluster175	6	Q9FUJ2	GO:0009823; P:cytokinin catabolic process; TAS:TAIR	Arachis_valida|AravalEVm008807t1;Valsten1|AravsEVm005780t2;Arachis_hypogaea_Tifguard|ArahypEVm004564t4;Arachis_hypogaea_SunOleic_97R|ArahypEVm004564t4;Arachis_hypogaea_Tifguard|ArahypEVm004564t1;Arachis_hypogaea_SunOleic_97R|ArahypEVm004564t1
cluster176	6	P47927	GO:0010093; P:specification of floral organ identity; IMP:CACAO	Arachis_valida|AravalEVm029849t1;Valsten1|AravsEVm002241t6;Arachis_hypogaea_SunOleic_97R|ArahypEVm003879t1;Valsten1|AravsEVm002241t3;Arachis_hypogaea_SunOleic_97R|ArahypEVm003665t1;Arachis_hypogaea_SunOleic_97R|ArahypEVm003665t3
cluster177	6	Q3B724	GO:0080092; P:regulation of pollen tube growth; IMP:TAIR	Arachis_valida|AravalEVm002218t6;Valsten1|AravsEVm000247t1;Arachis_hypogaea_SunOleic_97R|ArahypEVm003073t3;Arachis_stenosperma|ArasteEVm000225t4;Arachis_hypogaea_Tifguard|ArahypEVm000237t1;Arachis_hypogaea_SunOleic_97R|ArahypEVm000237t1
cluster178	6	F4JT80	GO:0007165; P:signal transduction; IEA:InterPro	Arachis_valida|AravalEVm000951t5;Arachis_hypogaea_Tifguard|ArahypEVm000305t9;Arachis_stenosperma|ArasteEVm000811t3;Arachis_hypogaea_Tifguard|ArahypEVm000305t8;Arachis_hypogaea_Tifguard|ArahypEVm000305t4;Arachis_hypogaea_SunOleic_97R|ArahypEVm000305t8
cluster179	6	Q7XA40	GO:0006952; P:defense response; IEA:UniProtKB-KW	Arachis_valida|AravalEVm003527t3;Arachis_stenosperma|ArasteEVm000953t1;Arachis_hypogaea_SunOleic_97R|ArahypEVm000269t4;Valsten1|AravsEVm012566t20;Arachis_hypogaea_Tifguard|ArahypEVm000806t4;Arachis_stenosperma|ArasteEVm009224t6
cluster180	6	Q93X23	GO:0050551; F:myrcene synthase activity; IEA:UniProtKB-EC	Arachis_valida|AravalEVm006313t3;Arachis_hypogaea_Tifguard|ArahypEVm003184t1;Arachis_stenosperma|ArasteEVm004450t1;Arachis_hypogaea_SunOleic_97R|ArahypEVm003184t2;Arachis_valida|AravalEVm006885t3;Valsten1|AravsEVm014542t3
cluster181	6	Q9S9M5	GO:0007166; P:cell surface receptor signaling pathway; IBA:GO_Central	Arachis_valida|AravalEVm004632t1;Valsten1|AravsEVm003170t4;Valsten1|AravsEVm003170t1;Arachis_stenosperma|ArasteEVm002210t5;Arachis_stenosperma|ArasteEVm002210t4;Arachis_hypogaea_SunOleic_97R|ArahypEVm013985t1
cluster182	6	Q9SR40	GO:0046274; P:lignin catabolic process; IEA:UniProtKB-KW	Arachis_valida|AravalEVm008233t1;Valsten1|AravsEVm004933t2;Valsten1|AravsEVm004933t1;Arachis_hypogaea_Tifguard|ArahypEVm013969t1;Arachis_stenosperma|ArasteEVm005225t1;Arachis_hypogaea_SunOleic_97R|ArahypEVm013969t1
cluster183	6	Q9SZE7	GO:0009651; P:response to salt stress; IEP:TAIR	Arachis_valida|AravalEVm022525t1;Arachis_hypogaea_SunOleic_97R|ArahypEVm012312t1;Arachis_valida|AravalEVm022329t1;Valsten1|AravsEVm015019t1;Arachis_hypogaea_Tifguard|ArahypEVm010586t1;Arachis_hypogaea_SunOleic_97R|ArahypEVm010586t1
cluster184	6	Q8S4R4	GO:0016117; P:carotenoid biosynthetic process; IEA:UniProtKB-KW	Arachis_valida|AravalEVm007342t1;Valsten1|AravsEVm005001t3;Arachis_stenosperma|ArasteEVm004457t4;Arachis_hypogaea_SunOleic_97R|ArahypEVm003722t5;Arachis_stenosperma|ArasteEVm004457t2;Arachis_hypogaea_SunOleic_97R|ArahypEVm003722t9
cluster185	6	Q7XA40	GO:0006952; P:defense response; IEA:UniProtKB-KW	Arachis_valida|AravalEVm002559t4;Valsten1|AravsEVm019253t5;Arachis_hypogaea_Tifguard|ArahypEVm001098t7;Arachis_stenosperma|ArasteEVm001813t6;Arachis_hypogaea_SunOleic_97R|ArahypEVm001098t7;Arachis_stenosperma|ArasteEVm001813t7
cluster186	6	Q8H3P9	GO:0006813; P:potassium ion transport; IBA:GO_Central	Arachis_valida|AravalEVm002908t3;Valsten1|AravsEVm001958t1;Arachis_hypogaea_Tifguard|ArahypEVm001382t2;Arachis_stenosperma|ArasteEVm002262t4;Arachis_hypogaea_SunOleic_97R|ArahypEVm001382t4;Valsten1|AravsEVm002059t2
cluster187	6	N/A	N/A	Arachis_valida|AravalEVm022341t1;Valsten1|AravsEVm015044t2;Arachis_hypogaea_Tifguard|ArahypEVm011647t1;Arachis_valida|AravalEVm022341t2;Arachis_hypogaea_Tifguard|ArahypEVm013266t1;Arachis_hypogaea_SunOleic_97R|ArahypEVm006733t1
cluster188	6	Q38910	GO:0010411; P:xyloglucan metabolic process; IEA:InterPro	Arachis_valida|AravalEVm020211t4;Valsten1|AravsEVm018231t3;Arachis_stenosperma|ArasteEVm017730t3;Arachis_hypogaea_SunOleic_97R|ArahypEVm013988t1;Arachis_hypogaea_SunOleic_97R|ArahypEVm014405t1;Arachis_hypogaea_SunOleic_97R|ArahypEVm014406t1
cluster189	6	P24465	GO:0009835; P:fruit ripening; IEA:UniProtKB-KW	Arachis_valida|AravalEVm008840t2;Arachis_hypogaea_Tifguard|ArahypEVm004691t4;Arachis_stenosperma|ArasteEVm009634t1;Arachis_hypogaea_SunOleic_97R|ArahypEVm004691t1;Arachis_hypogaea_SunOleic_97R|ArahypEVm004691t4;Arachis_hypogaea_SunOleic_97R|ArahypEVm007278t3
cluster190	6	P48826	GO:0006098; P:pentose-phosphate shunt; IEA:UniProtKB-UniPathway	Arachis_valida|AravalEVm009635t1;Valsten1|AravsEVm006056t1;Arachis_hypogaea_Tifguard|ArahypEVm005631t3;Arachis_stenosperma|ArasteEVm004779t7;Arachis_hypogaea_SunOleic_97R|ArahypEVm005631t3;Arachis_hypogaea_SunOleic_97R|ArahypEVm014010t2
cluster191	6	E1U332	GO:0016491; F:oxidoreductase activity; IEA:UniProtKB-KW	Arachis_valida|AravalEVm024520t1;Valsten1|AravsEVm016468t4;Arachis_hypogaea_Tifguard|ArahypEVm012611t2;Arachis_stenosperma|ArasteEVm024941t1;Arachis_hypogaea_SunOleic_97R|ArahypEVm013102t2;Arachis_hypogaea_SunOleic_97R|ArahypEVm012611t2
cluster192	6	Q8L7F9	GO:0006486; P:protein glycosylation; IBA:GO_Central	Arachis_valida|AravalEVm005459t1;Arachis_hypogaea_Tifguard|ArahypEVm002447t8;Arachis_hypogaea_SunOleic_97R|ArahypEVm002374t2;Arachis_hypogaea_SunOleic_97R|ArahypEVm002374t1;Arachis_valida|AravalEVm005459t2;Arachis_stenosperma|ArasteEVm003683t3
cluster193	6	N/A	N/A	Arachis_valida|AravalEVm015213t3;Arachis_hypogaea_SunOleic_97R|ArahypEVm008167t2;Arachis_valida|AravalEVm020104t1;Arachis_stenosperma|ArasteEVm014311t1;Arachis_hypogaea_SunOleic_97R|ArahypEVm008167t1;Arachis_hypogaea_SunOleic_97R|ArahypEVm008167t4
cluster194	6	O22309	GO:0046983; F:protein dimerization activity; IEA:InterPro	Arachis_valida|AravalEVm019349t1;Valsten1|AravsEVm013049t1;Arachis_hypogaea_Tifguard|ArahypEVm010106t1;Arachis_stenosperma|ArasteEVm012731t1;Arachis_hypogaea_SunOleic_97R|ArahypEVm010106t1;Arachis_hypogaea_SunOleic_97R|ArahypEVm010018t1
cluster195	6	Q680K8	GO:0016567; P:protein ubiquitination; IEA:UniProtKB-UniPathway	Arachis_valida|AravalEVm022338t1;Valsten1|AravsEVm014948t2;Valsten1|AravsEVm014948t1;Arachis_stenosperma|ArasteEVm020357t1;Arachis_hypogaea_SunOleic_97R|ArahypEVm012063t5;Arachis_valida|AravalEVm022971t1
cluster196	6	Q9H748	GO:0016567; P:protein ubiquitination; IDA:FlyBase	Arachis_stenosperma|ArasteEVm013559t1;Valsten1|AravsEVm020148t1;Arachis_hypogaea_Tifguard|ArahypEVm009868t3;Arachis_stenosperma|ArasteEVm015018t1;Arachis_hypogaea_SunOleic_97R|ArahypEVm009868t3;Arachis_hypogaea_SunOleic_97R|ArahypEVm008803t2
cluster197	6	Q9LT96	GO:0004674; F:protein serine/threonine kinase activity; IEA:UniProtKB-KW	Arachis_valida|AravalEVm030556t1;Valsten1|AravsEVm002358t2;Arachis_hypogaea_Tifguard|ArahypEVm000609t18;Arachis_hypogaea_Tifguard|ArahypEVm000609t4;Arachis_stenosperma|ArasteEVm001109t3;Arachis_stenosperma|ArasteEVm001109t4
cluster198	6	Q84KK6	GO:0009701; P:isoflavonoid phytoalexin biosynthetic process; IDA:UniProtKB	Arachis_valida|AravalEVm018797t1;Valsten1|AravsEVm012728t2;Arachis_hypogaea_Tifguard|ArahypEVm010226t1;Arachis_stenosperma|ArasteEVm012974t2;Arachis_hypogaea_SunOleic_97R|ArahypEVm010226t1;Arachis_hypogaea_SunOleic_97R|ArahypEVm010226t2
cluster199	6	Q9SCW1	GO:0005975; P:carbohydrate metabolic process; IEA:InterPro	Arachis_valida|AravalEVm002426t6;Arachis_hypogaea_Tifguard|ArahypEVm017564t2;Arachis_stenosperma|ArasteEVm001805t3;Valsten1|AravsEVm012777t3;Arachis_valida|AravalEVm027811t2;Arachis_hypogaea_SunOleic_97R|ArahypEVm017564t4
cluster200	6	U3U992	GO:1900994; P:(-)-secologanin biosynthetic process; IDA:UniProtKB	Arachis_valida|AravalEVm011047t2;Valsten1|AravsEVm007405t6;Arachis_hypogaea_Tifguard|ArahypEVm005846t5;Arachis_stenosperma|ArasteEVm007702t2;Arachis_hypogaea_SunOleic_97R|ArahypEVm005846t14;Valsten1|AravsEVm007405t4
cluster201	6	K4CI52	GO:0016125; P:sterol metabolic process; IBA:GO_Central	Arachis_valida|AravalEVm017090t1;Arachis_hypogaea_SunOleic_97R|ArahypEVm006420t5;Arachis_hypogaea_SunOleic_97R|ArahypEVm006420t2;Arachis_hypogaea_SunOleic_97R|ArahypEVm006420t7;Arachis_valida|AravalEVm011271t1;Arachis_stenosperma|ArasteEVm006624t3
cluster202	6	Q681X4	GO:0006355; P:regulation of transcription, DNA-templated; TAS:TAIR	Arachis_valida|AravalEVm064840t1;Arachis_hypogaea_Tifguard|ArahypEVm022464t2;Arachis_stenosperma|ArasteEVm030640t1;Arachis_hypogaea_SunOleic_97R|ArahypEVm022464t2;Arachis_hypogaea_Tifguard|ArahypEVm022464t1;Arachis_hypogaea_SunOleic_97R|ArahypEVm022464t1
cluster203	6	N/A	N/A	Arachis_valida|AravalEVm028478t1;Arachis_hypogaea_Tifguard|ArahypEVm013225t3;Arachis_stenosperma|ArasteEVm013741t2;Arachis_hypogaea_SunOleic_97R|ArahypEVm013225t1;Arachis_hypogaea_Tifguard|ArahypEVm013225t2;Arachis_hypogaea_SunOleic_97R|ArahypEVm013225t2
cluster204	6	Q39173	GO:0006979; P:response to oxidative stress; IEP:TAIR	Valsten1|AravsEVm013816t3;Valsten1|AravsEVm013816t1;Arachis_hypogaea_Tifguard|ArahypEVm011314t1;Arachis_hypogaea_SunOleic_97R|ArahypEVm011314t1;Arachis_valida|AravalEVm020877t1;Arachis_hypogaea_SunOleic_97R|ArahypEVm011313t1
cluster205	6	P81370	GO:0031640; P:killing of cells of other organism; IEA:UniProtKB-KW	Valsten1|AravsEVm024473t1;Valsten1|AravsEVm024474t1;Arachis_valida|AravalEVm035739t1;Arachis_hypogaea_Tifguard|ArahypEVm018186t1;Arachis_stenosperma|ArasteEVm023631t1;Arachis_hypogaea_SunOleic_97R|ArahypEVm018186t1
cluster206	6	Q8VZG2	GO:0009863; P:salicylic acid mediated signaling pathway; IMP:TAIR	Arachis_hypogaea_Tifguard|ArahypEVm005438t4;Arachis_hypogaea_Tifguard|ArahypEVm005438t1;Arachis_hypogaea_Tifguard|ArahypEVm005438t2;Arachis_hypogaea_Tifguard|ArahypEVm005438t5;Arachis_hypogaea_Tifguard|ArahypEVm005438t3;Arachis_hypogaea_SunOleic_97R|ArahypEVm005438t3
cluster207	6	N/A	N/A	Arachis_hypogaea_Tifguard|ArahypEVm012133t4;Arachis_hypogaea_Tifguard|ArahypEVm012133t3;Arachis_hypogaea_Tifguard|ArahypEVm012133t6;Arachis_hypogaea_SunOleic_97R|ArahypEVm018554t4;Arachis_hypogaea_SunOleic_97R|ArahypEVm015145t1;Arachis_stenosperma|ArasteEVm013957t3
cluster208	6	Q9SGN6	GO:0009651; P:response to salt stress; TAS:TAIR	Arachis_hypogaea_Tifguard|ArahypEVm003029t2;Arachis_hypogaea_Tifguard|ArahypEVm003029t3;Arachis_stenosperma|ArasteEVm005698t7;Arachis_stenosperma|ArasteEVm005698t4;Arachis_hypogaea_SunOleic_97R|ArahypEVm010158t2;Arachis_hypogaea_SunOleic_97R|ArahypEVm010158t4
cluster209	6	Q6Z2M9	GO:0018105; P:peptidyl-serine phosphorylation; IBA:GO_Central	Arachis_stenosperma|ArasteEVm006466t4;Arachis_stenosperma|ArasteEVm006466t2;Arachis_stenosperma|ArasteEVm006466t5;Arachis_stenosperma|ArasteEVm006466t6;Arachis_valida|AravalEVm006957t3;Arachis_hypogaea_SunOleic_97R|ArahypEVm004413t7
cluster210	6	F4KF16	GO:0006486; P:protein glycosylation; IEA:UniProtKB-UniPathway	Valsten1|AravsEVm006138t2;Arachis_hypogaea_Tifguard|ArahypEVm010355t3;Arachis_stenosperma|ArasteEVm012727t3;Arachis_hypogaea_SunOleic_97R|ArahypEVm008252t5;Arachis_hypogaea_SunOleic_97R|ArahypEVm010355t3;Arachis_valida|AravalEVm008033t3
cluster211	6	Q9C994	GO:0006855; P:drug transmembrane transport; IBA:GO_Central	Valsten1|AravsEVm007583t3;Arachis_hypogaea_Tifguard|ArahypEVm005988t1;Arachis_hypogaea_SunOleic_97R|ArahypEVm005988t1;Arachis_valida|AravalEVm011255t1;Arachis_hypogaea_Tifguard|ArahypEVm005966t1;Arachis_hypogaea_SunOleic_97R|ArahypEVm005966t1
cluster212	5	Q5EAF2	GO:0009651; P:response to salt stress; IEP:UniProtKB	Arachis_valida|AravalEVm018680t4;Arachis_valida|AravalEVm018680t1;Arachis_valida|AravalEVm018680t3;Arachis_valida|AravalEVm018680t5;Arachis_valida|AravalEVm018680t7
cluster213	5	Q93Z79	GO:0016705; F:oxidoreductase activity, acting on paired donors, with incorporation or reduction of molecular oxygen; IEA:InterPro	Arachis_valida|AravalEVm008769t1;Arachis_valida|AravalEVm008367t2;Arachis_valida|AravalEVm009278t1;Arachis_valida|AravalEVm009930t2;Arachis_valida|AravalEVm009930t4
cluster214	5	Q8H157	GO:0009624; P:response to nematode; IEP:TAIR	Arachis_valida|AravalEVm007218t1;Arachis_valida|AravalEVm007218t3;Arachis_hypogaea_Tifguard|ArahypEVm003574t5;Arachis_stenosperma|ArasteEVm005039t2;Arachis_hypogaea_SunOleic_97R|ArahypEVm003574t5
cluster215	5	O82316	GO:0015250; F:water channel activity; IBA:GO_Central	Arachis_valida|AravalEVm032089t1;Arachis_valida|AravalEVm032089t2;Arachis_hypogaea_Tifguard|ArahypEVm016276t1;Arachis_stenosperma|ArasteEVm020580t1;Arachis_hypogaea_SunOleic_97R|ArahypEVm016276t1
cluster216	5	N/A	N/A	Arachis_valida|AravalEVm024735t1;Arachis_valida|AravalEVm018603t1;Arachis_valida|AravalEVm021244t1;Arachis_valida|AravalEVm023010t1;Arachis_valida|AravalEVm033810t1
cluster217	5	Q69ZQ1	GO:0048741; P:skeletal muscle fiber development; IMP:MGI	Arachis_valida|AravalEVm004521t1;Arachis_valida|AravalEVm004521t2;Valsten1|AravsEVm002390t3;Valsten1|AravsEVm002390t1;Arachis_stenosperma|ArasteEVm003343t2
cluster218	5	Q4WQZ2	GO:0004364; F:glutathione transferase activity; IDA:AspGD	Arachis_valida|AravalEVm037401t1;Arachis_valida|AravalEVm027616t2;Arachis_valida|AravalEVm029509t1;Arachis_valida|AravalEVm035339t1;Arachis_valida|AravalEVm031763t1
cluster219	5	Q8J0P4	GO:0071555; P:cell wall organization; IEA:UniProtKB-KW	Arachis_valida|AravalEVm014145t1;Arachis_valida|AravalEVm011692t3;Arachis_valida|AravalEVm018248t3;Arachis_valida|AravalEVm018710t1;Arachis_valida|AravalEVm013839t1
cluster220	5	O23547	GO:0019953; P:sexual reproduction; IEA:InterPro	Arachis_valida|AravalEVm031798t1;Arachis_valida|AravalEVm030790t1;Arachis_valida|AravalEVm031798t2;Arachis_valida|AravalEVm031626t1;Valsten1|AravsEVm021650t3
cluster221	5	P54267	GO:0030448; P:hyphal growth; IMP:AspGD	Arachis_valida|AravalEVm014109t1;Arachis_valida|AravalEVm002223t1;Arachis_valida|AravalEVm003942t1;Arachis_valida|AravalEVm044763t1;Arachis_valida|AravalEVm048830t1
cluster222	5	P53496	GO:0005200; F:structural constituent of cytoskeleton; ISS:TAIR	Arachis_valida|AravalEVm048759t1;Arachis_valida|AravalEVm046640t1;Arachis_hypogaea_Tifguard|ArahypEVm009830t4;Arachis_hypogaea_SunOleic_97R|ArahypEVm009830t3;Arachis_hypogaea_SunOleic_97R|ArahypEVm009830t2
cluster223	5	Q9UTT1	GO:0006511; P:ubiquitin-dependent protein catabolic process; IEA:InterPro	Arachis_valida|AravalEVm011134t1;Arachis_valida|AravalEVm000744t2;Arachis_stenosperma|ArasteEVm000498t3;Arachis_stenosperma|ArasteEVm000498t7;Arachis_stenosperma|ArasteEVm000498t8
cluster224	5	Q9P7J8	GO:0006468; P:protein phosphorylation; IBA:GO_Central	Arachis_valida|AravalEVm007975t1;Arachis_valida|AravalEVm005682t2;Arachis_valida|AravalEVm005682t3;Arachis_valida|AravalEVm003968t3;Arachis_stenosperma|ArasteEVm008286t1
cluster225	5	O31680	GO:0050664; F:oxidoreductase activity, acting on NAD(P)H, oxygen as acceptor; IBA:GO_Central	Arachis_valida|AravalEVm020999t1;Arachis_valida|AravalEVm025927t1;Arachis_valida|AravalEVm029941t1;Arachis_hypogaea_Tifguard|ArahypEVm015297t1;Arachis_hypogaea_SunOleic_97R|ArahypEVm015297t1
cluster226	5	P35197	GO:0006890; P:retrograde vesicle-mediated transport, Golgi to ER; IDA:SGD	Arachis_valida|AravalEVm018514t1;Arachis_valida|AravalEVm013819t1;Valsten1|AravsEVm001734t4;Arachis_stenosperma|ArasteEVm002299t3;Arachis_stenosperma|ArasteEVm002299t2
cluster227	5	O14313	GO:0042026; P:protein refolding; IC:PomBase	Arachis_valida|AravalEVm045240t1;Arachis_valida|AravalEVm048539t2;Arachis_valida|AravalEVm047931t1;Arachis_valida|AravalEVm030353t2;Arachis_valida|AravalEVm048508t1
cluster228	5	N/A	N/A	Arachis_valida|AravalEVm025230t1;Arachis_valida|AravalEVm020130t1;Arachis_valida|AravalEVm025230t2;Arachis_valida|AravalEVm025230t3;Arachis_valida|AravalEVm029076t1
cluster229	5	P25303	GO:0030433; P:ubiquitin-dependent ERAD pathway; IMP:SGD	Arachis_valida|AravalEVm016053t1;Arachis_valida|AravalEVm009357t1;Arachis_valida|AravalEVm010886t1;Arachis_valida|AravalEVm041317t1;Arachis_valida|AravalEVm004680t1
cluster230	5	P29429	GO:0006662; P:glycerol ether metabolic process; IEA:InterPro	Arachis_valida|AravalEVm078192t1;Arachis_valida|AravalEVm049404t1;Arachis_hypogaea_SunOleic_97R|ArahypEVm026452t1;Arachis_hypogaea_SunOleic_97R|ArahypEVm023653t3;Arachis_hypogaea_SunOleic_97R|ArahypEVm023653t1
cluster231	5	Q9LZU5	GO:0007018; P:microtubule-based movement; IBA:GO_Central	Arachis_valida|AravalEVm001107t3;Arachis_valida|AravalEVm001107t4;Arachis_valida|AravalEVm001106t3;Arachis_stenosperma|ArasteEVm000840t7;Arachis_stenosperma|ArasteEVm000840t1
cluster232	5	Q9LUC5	GO:0016705; F:oxidoreductase activity, acting on paired donors, with incorporation or reduction of molecular oxygen; IEA:InterPro	Arachis_valida|AravalEVm009136t2;Arachis_valida|AravalEVm009136t1;Arachis_stenosperma|ArasteEVm006948t8;Arachis_stenosperma|ArasteEVm006948t2;Valsten1|AravsEVm027041t3
cluster233	5	O94564	GO:0006091; P:generation of precursor metabolites and energy; NAS:PomBase	Arachis_valida|AravalEVm019743t1;Arachis_valida|AravalEVm019797t1;Arachis_valida|AravalEVm020458t1;Arachis_valida|AravalEVm020447t1;Arachis_valida|AravalEVm021274t1
cluster234	5	P25986	GO:0009607; P:response to biotic stimulus; IEA:UniProtKB-KW	Arachis_valida|AravalEVm068589t12;Arachis_valida|AravalEVm068589t6;Arachis_hypogaea_SunOleic_97R|ArahypEVm024532t3;Valsten1|AravsEVm037097t3;Arachis_hypogaea_Tifguard|ArahypEVm024545t3
cluster235	5	P51910	GO:0042246; P:tissue regeneration; ISS:UniProtKB	Arachis_valida|AravalEVm043581t1;Arachis_valida|AravalEVm015505t1;Arachis_valida|AravalEVm022309t1;Arachis_valida|AravalEVm029661t1;Arachis_valida|AravalEVm040265t1
cluster236	5	P80683	GO:0042302; F:structural constituent of cuticle; IEA:UniProtKB-KW	Arachis_valida|AravalEVm030482t1;Arachis_valida|AravalEVm030482t2;Arachis_valida|AravalEVm038576t1;Arachis_valida|AravalEVm030482t6;Arachis_stenosperma|ArasteEVm015910t2
cluster237	5	O60121	GO:0007006; P:mitochondrial membrane organization; ISS:PomBase	Arachis_valida|AravalEVm016463t1;Arachis_valida|AravalEVm016463t5;Arachis_valida|AravalEVm016463t7;Arachis_valida|AravalEVm016463t8;Arachis_hypogaea_Tifguard|ArahypEVm018158t1
cluster238	5	Q944C1	GO:0016042; P:lipid catabolic process; IEA:UniProtKB-KW	Arachis_valida|AravalEVm012298t1;Arachis_valida|AravalEVm006588t3;Arachis_valida|AravalEVm022323t1;Arachis_stenosperma|ArasteEVm004904t3;Arachis_stenosperma|ArasteEVm015142t6
cluster239	5	Q9ASX5	GO:0016301; F:kinase activity; IEA:UniProtKB-KW	Arachis_valida|AravalEVm008321t3;Arachis_valida|AravalEVm022877t5;Arachis_valida|AravalEVm004363t5;Arachis_valida|AravalEVm022877t1;Arachis_valida|AravalEVm022877t4
cluster240	5	A9X7L0	GO:0046983; F:protein dimerization activity; IEA:InterPro	Arachis_valida|AravalEVm017193t1;Arachis_valida|AravalEVm017193t3;Arachis_valida|AravalEVm017193t5;Valsten1|AravsEVm022928t1;Arachis_hypogaea_SunOleic_97R|ArahypEVm010219t1
cluster241	5	N/A	N/A	Arachis_valida|AravalEVm026849t7;Arachis_valida|AravalEVm026849t1;Arachis_valida|AravalEVm026849t2;Arachis_valida|AravalEVm026849t5;Arachis_valida|AravalEVm026849t6
cluster242	5	Q8R1Q9	GO:0019303; P:D-ribose catabolic process; IEA:UniProtKB-UniRule	Arachis_valida|AravalEVm018423t2;Arachis_valida|AravalEVm018423t4;Arachis_hypogaea_Tifguard|ArahypEVm009808t5;Arachis_hypogaea_SunOleic_97R|ArahypEVm009808t3;Arachis_hypogaea_Tifguard|ArahypEVm009808t7
cluster243	5	Q9XI99	GO:0048316; P:seed development; IMP:TAIR	Arachis_valida|AravalEVm025833t2;Arachis_valida|AravalEVm025833t1;Arachis_valida|AravalEVm025833t3;Arachis_valida|AravalEVm025833t4;Valsten1|AravsEVm015031t5
cluster244	5	Q9NFT7	GO:0006013; P:mannose metabolic process; ISS:FlyBase	Arachis_valida|AravalEVm012122t2;Arachis_valida|AravalEVm006214t3;Arachis_valida|AravalEVm010801t1;Arachis_valida|AravalEVm010657t1;Valsten1|AravsEVm006958t2
cluster245	5	Q9C8M9	GO:0006468; P:protein phosphorylation; IBA:GO_Central	Arachis_valida|AravalEVm003948t2;Arachis_valida|AravalEVm003948t4;Arachis_stenosperma|ArasteEVm002298t3;Arachis_hypogaea_SunOleic_97R|ArahypEVm001204t5;Arachis_hypogaea_SunOleic_97R|ArahypEVm001204t4
cluster246	5	Q9FGG3	GO:0022857; F:transmembrane transporter activity; IEA:InterPro	Arachis_valida|AravalEVm020471t5;Arachis_valida|AravalEVm020471t2;Arachis_valida|AravalEVm020471t3;Arachis_valida|AravalEVm020471t7;Arachis_valida|AravalEVm019169t1
cluster247	5	P16387	GO:0007124; P:pseudohyphal growth; IMP:SGD	Arachis_valida|AravalEVm015829t2;Arachis_valida|AravalEVm015356t1;Arachis_valida|AravalEVm016440t1;Valsten1|AravsEVm011230t3;Arachis_stenosperma|ArasteEVm000171t2
cluster248	5	A1ZAI5	GO:0010025; P:wax biosynthetic process; ISS:UniProtKB	Arachis_valida|AravalEVm009869t1;Arachis_valida|AravalEVm007983t1;Arachis_valida|AravalEVm008237t1;Arachis_valida|AravalEVm009073t2;Arachis_valida|AravalEVm009866t1
cluster249	5	Q56Y74	GO:0080188; P:RNA-directed DNA methylation; IMP:UniProtKB	Arachis_valida|AravalEVm009634t7;Arachis_valida|AravalEVm009634t1;Arachis_stenosperma|ArasteEVm003999t2;Arachis_hypogaea_SunOleic_97R|ArahypEVm002361t3;Arachis_hypogaea_SunOleic_97R|ArahypEVm005561t2
cluster250	5	Q4PCS5	GO:0006270; P:DNA replication initiation; IEA:EnsemblFungi	Arachis_valida|AravalEVm025460t1;Arachis_valida|AravalEVm030514t1;Arachis_hypogaea_Tifguard|ArahypEVm003229t1;Valsten1|AravsEVm017535t4;Arachis_stenosperma|ArasteEVm015963t4
cluster251	5	P40024	GO:0042254; P:ribosome biogenesis; IMP:SGD	Arachis_valida|AravalEVm005966t2;Arachis_valida|AravalEVm006237t1;Arachis_stenosperma|ArasteEVm010240t1;Valsten1|AravsEVm002775t3;Arachis_stenosperma|ArasteEVm011286t1
cluster252	5	Q8L7W8	GO:0010383; P:cell wall polysaccharide metabolic process; IBA:GO_Central	Arachis_valida|AravalEVm002257t9;Arachis_valida|AravalEVm002257t7;Valsten1|AravsEVm001560t4;Arachis_hypogaea_Tifguard|ArahypEVm014568t2;Arachis_stenosperma|ArasteEVm001713t1
cluster253	5	A1D4K4	GO:0006417; P:regulation of translation; IEA:UniProtKB-KW	Arachis_valida|AravalEVm002467t1;Arachis_valida|AravalEVm002467t2;Arachis_stenosperma|ArasteEVm003884t2;Valsten1|AravsEVm008253t3;Arachis_hypogaea_SunOleic_97R|ArahypEVm009851t2
cluster254	5	Q1MX30	GO:0046777; P:protein autophosphorylation; IDA:UniProtKB	Arachis_valida|AravalEVm001222t2;Arachis_valida|AravalEVm001222t4;Arachis_hypogaea_Tifguard|ArahypEVm000472t1;Arachis_hypogaea_SunOleic_97R|ArahypEVm004097t1;Arachis_hypogaea_SunOleic_97R|ArahypEVm000472t1
cluster255	5	Q9FHM0	GO:0010150; P:leaf senescence; IEP:TAIR	Arachis_valida|AravalEVm007537t2;Arachis_valida|AravalEVm012671t1;Arachis_valida|AravalEVm012909t1;Arachis_valida|AravalEVm013957t1;Arachis_valida|AravalEVm013957t2
cluster256	5	N/A	N/A	Arachis_valida|AravalEVm059491t3;Arachis_valida|AravalEVm059491t2;Arachis_valida|AravalEVm059491t1;Arachis_hypogaea_SunOleic_97R|ArahypEVm027645t1;Valsten1|AravsEVm044074t2
cluster257	5	N/A	N/A	Arachis_valida|AravalEVm022517t3;Arachis_valida|AravalEVm022517t5;Arachis_valida|AravalEVm022517t7;Arachis_valida|AravalEVm022517t9;Arachis_valida|AravalEVm036009t1
cluster258	5	Q9M2S6	GO:0006511; P:ubiquitin-dependent protein catabolic process; IMP:TAIR	Arachis_valida|AravalEVm070643t2;Arachis_valida|AravalEVm070643t1;Arachis_valida|AravalEVm028200t1;Arachis_hypogaea_Tifguard|ArahypEVm017440t3;Arachis_hypogaea_SunOleic_97R|ArahypEVm017440t2
cluster259	5	Q94AZ2	GO:0009414; P:response to water deprivation; IEP:TAIR	Arachis_valida|AravalEVm009143t1;Arachis_valida|AravalEVm009937t1;Arachis_hypogaea_Tifguard|ArahypEVm004912t3;Arachis_hypogaea_SunOleic_97R|ArahypEVm004912t2;Arachis_hypogaea_Tifguard|ArahypEVm004912t2
cluster260	5	O04619	GO:0022857; F:transmembrane transporter activity; IEA:InterPro	Arachis_valida|AravalEVm020605t2;Arachis_valida|AravalEVm020676t1;Arachis_valida|AravalEVm015296t1;Arachis_hypogaea_SunOleic_97R|ArahypEVm012150t3;Valsten1|AravsEVm011569t2
cluster261	5	Q09143	GO:0032006; P:regulation of TOR signaling; ISO:MGI	Arachis_valida|AravalEVm027490t1;Arachis_valida|AravalEVm009445t1;Arachis_hypogaea_Tifguard|ArahypEVm003807t1;Arachis_stenosperma|ArasteEVm015779t2;Arachis_hypogaea_SunOleic_97R|ArahypEVm003807t3
cluster262	5	Q9SIZ4	GO:0004672; F:protein kinase activity; IEA:InterPro	Arachis_valida|AravalEVm008653t1;Arachis_valida|AravalEVm008653t2;Arachis_valida|AravalEVm008653t3;Arachis_stenosperma|ArasteEVm004053t2;Arachis_hypogaea_SunOleic_97R|ArahypEVm007467t11
cluster263	5	P33080	GO:0009734; P:auxin-activated signaling pathway; IEA:UniProtKB-KW	Arachis_valida|AravalEVm087437t1;Arachis_valida|AravalEVm087436t1;Valsten1|AravsEVm063074t2;Valsten1|AravsEVm063087t6;Valsten1|AravsEVm063087t5
cluster264	5	Q8L7A0	GO:0016021; C:integral component of membrane; IEA:UniProtKB-KW	Arachis_valida|AravalEVm011015t4;Arachis_valida|AravalEVm011015t2;Valsten1|AravsEVm007745t8;Valsten1|AravsEVm007745t2;Arachis_hypogaea_SunOleic_97R|ArahypEVm012065t2
cluster265	5	Q9XED8	GO:0009734; P:auxin-activated signaling pathway; IEA:UniProtKB-KW	Arachis_valida|AravalEVm004449t2;Arachis_valida|AravalEVm004449t4;Valsten1|AravsEVm003260t2;Arachis_stenosperma|ArasteEVm002364t1;Arachis_stenosperma|ArasteEVm001298t2
cluster266	5	Q8XBT6	GO:0019853; P:L-ascorbic acid biosynthetic process; IEA:UniProtKB-KW	Arachis_valida|AravalEVm057602t1;Arachis_valida|AravalEVm019467t1;Arachis_valida|AravalEVm027563t1;Arachis_valida|AravalEVm027391t1;Arachis_valida|AravalEVm028143t1
cluster267	5	Q8RY89	GO:0005524; F:ATP binding; IEA:UniProtKB-KW	Arachis_valida|AravalEVm003562t4;Arachis_valida|AravalEVm003562t2;Arachis_hypogaea_Tifguard|ArahypEVm004156t2;Arachis_stenosperma|ArasteEVm002332t5;Arachis_valida|AravalEVm003115t3
cluster268	5	Q94B74	GO:0006979; P:response to oxidative stress; IMP:TAIR	Arachis_valida|AravalEVm017038t1;Arachis_hypogaea_Tifguard|ArahypEVm021725t1;Arachis_stenosperma|ArasteEVm016262t4;Arachis_hypogaea_SunOleic_97R|ArahypEVm021725t1;Arachis_hypogaea_SunOleic_97R|ArahypEVm014290t2
cluster269	5	P16064	GO:0009611; P:response to wounding; IEA:InterPro	Arachis_valida|AravalEVm063747t1;Arachis_hypogaea_Tifguard|ArahypEVm027266t1;Arachis_hypogaea_SunOleic_97R|ArahypEVm027266t1;Arachis_valida|AravalEVm084997t1;Valsten1|AravsEVm068407t1
cluster270	5	B3H5Q1	GO:0005975; P:carbohydrate metabolic process; IEA:InterPro	Arachis_valida|AravalEVm009636t1;Arachis_hypogaea_Tifguard|ArahypEVm005147t7;Arachis_stenosperma|ArasteEVm006474t2;Arachis_hypogaea_SunOleic_97R|ArahypEVm005034t1;Arachis_hypogaea_SunOleic_97R|ArahypEVm005009t1
cluster271	5	F4JJE0	GO:0006656; P:phosphatidylcholine biosynthetic process; IMP:TAIR	Arachis_valida|AravalEVm027439t3;Valsten1|AravsEVm018627t2;Valsten1|AravsEVm018627t3;Arachis_stenosperma|ArasteEVm010265t4;Arachis_valida|AravalEVm013224t1
cluster272	5	P30284	GO:0007088; P:regulation of mitotic nuclear division; IBA:GO_Central	Arachis_valida|AravalEVm011751t1;Arachis_stenosperma|ArasteEVm013100t1;Arachis_hypogaea_SunOleic_97R|ArahypEVm010310t1;Arachis_valida|AravalEVm013987t1;Arachis_stenosperma|ArasteEVm010571t1
cluster273	5	P25317	GO:0009734; P:auxin-activated signaling pathway; IEA:UniProtKB-KW	Arachis_valida|AravalEVm036266t1;Arachis_hypogaea_Tifguard|ArahypEVm018433t3;Arachis_hypogaea_SunOleic_97R|ArahypEVm018433t3;Arachis_valida|AravalEVm036072t1;Valsten1|AravsEVm024708t2
cluster274	5	Q9C5S9	GO:0000302; P:response to reactive oxygen species; IEP:TAIR	Arachis_valida|AravalEVm001827t6;Arachis_hypogaea_Tifguard|ArahypEVm000752t4;Arachis_hypogaea_SunOleic_97R|ArahypEVm000752t4;Arachis_hypogaea_SunOleic_97R|ArahypEVm000752t2;Arachis_hypogaea_SunOleic_97R|ArahypEVm000752t1
cluster275	5	P47924	GO:0009231; P:riboflavin biosynthetic process; IMP:UniProtKB	Arachis_valida|AravalEVm008607t3;Arachis_hypogaea_Tifguard|ArahypEVm004010t2;Arachis_stenosperma|ArasteEVm005581t6;Arachis_hypogaea_SunOleic_97R|ArahypEVm013742t5;Arachis_hypogaea_Tifguard|ArahypEVm013742t5
cluster276	5	Q058N0	GO:0005634; C:nucleus; IEA:UniProtKB-SubCell	Arachis_valida|AravalEVm009411t1;Arachis_stenosperma|ArasteEVm006310t2;Arachis_valida|AravalEVm031405t2;Arachis_hypogaea_Tifguard|ArahypEVm005432t4;Arachis_hypogaea_SunOleic_97R|ArahypEVm005432t4
cluster277	5	Q9FWW9	GO:0050832; P:defense response to fungus; IEP:TAIR	Arachis_valida|AravalEVm013584t1;Valsten1|AravsEVm015121t1;Arachis_stenosperma|ArasteEVm010039t1;Valsten1|AravsEVm009715t2;Arachis_hypogaea_SunOleic_97R|ArahypEVm007743t2
cluster278	5	H2DH18	GO:0016705; F:oxidoreductase activity, acting on paired donors, with incorporation or reduction of molecular oxygen; IEA:InterPro	Arachis_valida|AravalEVm010477t2;Arachis_hypogaea_Tifguard|ArahypEVm004942t1;Arachis_hypogaea_SunOleic_97R|ArahypEVm004942t1;Arachis_stenosperma|ArasteEVm006824t1;Arachis_valida|AravalEVm022955t1
cluster279	5	Q9FIG6	GO:0048046; C:apoplast; IEA:UniProtKB-SubCell	Arachis_hypogaea_Tifguard|ArahypEVm018427t1;Arachis_hypogaea_SunOleic_97R|ArahypEVm020979t1;Arachis_hypogaea_SunOleic_97R|ArahypEVm020979t2;Valsten1|AravsEVm029351t1;Arachis_hypogaea_SunOleic_97R|ArahypEVm018427t1
cluster280	5	A7PQW3	GO:0009607; P:response to biotic stimulus; IEA:UniProtKB-KW	Arachis_valida|AravalEVm022439t1;Valsten1|AravsEVm014734t2;Arachis_hypogaea_Tifguard|ArahypEVm012016t3;Arachis_hypogaea_SunOleic_97R|ArahypEVm012016t3;Valsten1|AravsEVm014734t4
cluster281	5	N/A	N/A	Arachis_valida|AravalEVm048329t1;Arachis_hypogaea_SunOleic_97R|ArahypEVm022690t4;Arachis_valida|AravalEVm046038t1;Valsten1|AravsEVm032047t3;Valsten1|AravsEVm032047t1
cluster282	5	Q9SF15	GO:0006952; P:defense response; IEA:UniProtKB-KW	Arachis_valida|AravalEVm013763t2;Valsten1|AravsEVm009435t1;Arachis_hypogaea_Tifguard|ArahypEVm008186t1;Arachis_hypogaea_SunOleic_97R|ArahypEVm008186t1;Arachis_valida|AravalEVm015203t1
cluster283	5	C6TBN2	GO:0016491; F:oxidoreductase activity; IEA:UniProtKB-KW	Arachis_valida|AravalEVm019660t3;Arachis_hypogaea_Tifguard|ArahypEVm010849t1;Arachis_stenosperma|ArasteEVm021666t1;Arachis_hypogaea_SunOleic_97R|ArahypEVm010849t1;Arachis_hypogaea_SunOleic_97R|ArahypEVm010847t1
cluster284	5	Q9M088	GO:0006952; P:defense response; IEA:UniProtKB-KW	Arachis_valida|AravalEVm011491t1;Valsten1|AravsEVm007548t2;Arachis_hypogaea_Tifguard|ArahypEVm005852t2;Arachis_hypogaea_SunOleic_97R|ArahypEVm006091t1;Arachis_hypogaea_SunOleic_97R|ArahypEVm005852t4
cluster285	5	Q9SCU5	GO:0006468; P:protein phosphorylation; IBA:GO_Central	Arachis_valida|AravalEVm005456t3;Valsten1|AravsEVm008034t4;Arachis_hypogaea_Tifguard|ArahypEVm003015t3;Arachis_stenosperma|ArasteEVm003215t1;Valsten1|AravsEVm004071t3
cluster286	5	N/A	N/A	Arachis_stenosperma|ArasteEVm004479t2;Arachis_valida|AravalEVm015457t2;Valsten1|AravsEVm002715t2;Arachis_hypogaea_Tifguard|ArahypEVm003170t7;Arachis_hypogaea_SunOleic_97R|ArahypEVm003170t7
cluster287	5	B8BLZ4	GO:0000160; P:phosphorelay signal transduction system; IEA:UniProtKB-KW	Arachis_valida|AravalEVm046824t2;Arachis_hypogaea_Tifguard|ArahypEVm019187t7;Arachis_stenosperma|ArasteEVm035070t1;Arachis_hypogaea_SunOleic_97R|ArahypEVm022567t4;Arachis_hypogaea_SunOleic_97R|ArahypEVm019187t3
cluster288	5	Q9C757	GO:0023052; P:signaling; TAS:TAIR	Arachis_valida|AravalEVm007306t1;Valsten1|AravsEVm004721t1;Arachis_stenosperma|ArasteEVm004991t1;Arachis_hypogaea_SunOleic_97R|ArahypEVm003743t1;Arachis_hypogaea_SunOleic_97R|ArahypEVm005086t1
cluster289	5	Q9ZS45	GO:0008295; P:spermidine biosynthetic process; IEA:UniProtKB-UniPathway	Arachis_valida|AravalEVm024805t2;Valsten1|AravsEVm012306t6;Arachis_valida|AravalEVm024805t1;Arachis_hypogaea_SunOleic_97R|ArahypEVm010290t4;Valsten1|AravsEVm012306t1
cluster290	5	Q9FWX7	GO:0010540; P:basipetal auxin transport; IBA:GO_Central	Arachis_hypogaea_SunOleic_97R|ArahypEVm000370t2;Arachis_stenosperma|ArasteEVm000394t4;Arachis_stenosperma|ArasteEVm000394t6;Arachis_stenosperma|ArasteEVm000394t7;Arachis_hypogaea_Tifguard|ArahypEVm013878t5
cluster291	5	N/A	N/A	Arachis_valida|AravalEVm043398t1;Arachis_hypogaea_Tifguard|ArahypEVm020663t1;Arachis_stenosperma|ArasteEVm028481t1;Arachis_hypogaea_SunOleic_97R|ArahypEVm021224t1;Arachis_hypogaea_SunOleic_97R|ArahypEVm020663t1
cluster292	5	P54861	GO:0016050; P:vesicle organization; IDA:ParkinsonsUK-UCL	Arachis_valida|AravalEVm015530t1;Arachis_hypogaea_Tifguard|ArahypEVm002737t3;Arachis_valida|AravalEVm006119t4;Arachis_stenosperma|ArasteEVm003097t2;Arachis_hypogaea_SunOleic_97R|ArahypEVm004346t2
cluster293	5	Q6DBP3	GO:0008643; P:carbohydrate transport; IEA:UniProtKB-KW	Arachis_valida|AravalEVm024803t1;Valsten1|AravsEVm016659t1;Arachis_hypogaea_Tifguard|ArahypEVm008174t4;Arachis_stenosperma|ArasteEVm016573t1;Arachis_hypogaea_SunOleic_97R|ArahypEVm008174t4
cluster294	5	P84634	GO:0009616; P:virus induced gene silencing; IGI:TAIR	Arachis_valida|AravalEVm000876t5;Arachis_hypogaea_Tifguard|ArahypEVm000038t5;Arachis_hypogaea_SunOleic_97R|ArahypEVm000038t4;Arachis_hypogaea_Tifguard|ArahypEVm000038t4;Arachis_stenosperma|ArasteEVm004557t2
cluster295	5	Q0D5G4	GO:0008270; F:zinc ion binding; IEA:InterPro	Arachis_valida|AravalEVm004385t4;Arachis_hypogaea_Tifguard|ArahypEVm000788t3;Arachis_stenosperma|ArasteEVm001590t7;Arachis_hypogaea_SunOleic_97R|ArahypEVm000788t4;Arachis_stenosperma|ArasteEVm001433t2
cluster296	5	B6VJS4	GO:0019438; P:aromatic compound biosynthetic process; IBA:GO_Central	Arachis_valida|AravalEVm019076t1;Valsten1|AravsEVm012644t3;Arachis_hypogaea_Tifguard|ArahypEVm010108t1;Arachis_hypogaea_SunOleic_97R|ArahypEVm010221t1;Arachis_hypogaea_Tifguard|ArahypEVm010221t1
cluster297	5	Q9SVP7	GO:0009451; P:RNA modification; IBA:GO_Central	Arachis_valida|AravalEVm001027t2;Valsten1|AravsEVm003121t2;Arachis_stenosperma|ArasteEVm003030t2;Arachis_hypogaea_SunOleic_97R|ArahypEVm001199t1;Valsten1|AravsEVm002866t2
cluster298	5	Q5N6V8	GO:0000160; P:phosphorelay signal transduction system; IEA:UniProtKB-KW	Arachis_valida|AravalEVm026270t4;Valsten1|AravsEVm004451t2;Arachis_stenosperma|ArasteEVm005744t5;Arachis_stenosperma|ArasteEVm005871t3;Arachis_stenosperma|ArasteEVm005871t5
cluster299	5	Q6YU51	GO:0009228; P:thiamine biosynthetic process; IEA:UniProtKB-KW	Arachis_valida|AravalEVm003814t2;Arachis_hypogaea_SunOleic_97R|ArahypEVm001774t2;Arachis_hypogaea_SunOleic_97R|ArahypEVm001774t1;Arachis_hypogaea_SunOleic_97R|ArahypEVm001774t3;Arachis_hypogaea_SunOleic_97R|ArahypEVm001774t4
cluster300	5	Q56ZL8	GO:0010118; P:stomatal movement; IGI:TAIR	Arachis_valida|AravalEVm005413t5;Arachis_hypogaea_SunOleic_97R|ArahypEVm009193t3;Arachis_hypogaea_SunOleic_97R|ArahypEVm009193t1;Arachis_hypogaea_SunOleic_97R|ArahypEVm009193t6;Arachis_hypogaea_SunOleic_97R|ArahypEVm009193t9
cluster301	5	Q0CCL1	GO:0070086; P:ubiquitin-dependent endocytosis; IEA:EnsemblFungi	Arachis_valida|AravalEVm010495t1;Arachis_stenosperma|ArasteEVm000009t1;Arachis_stenosperma|ArasteEVm000009t3;Arachis_stenosperma|ArasteEVm000009t5;Arachis_stenosperma|ArasteEVm000009t8
cluster302	5	Q7ZZ25	GO:0016887; F:ATPase activity; IEA:UniProtKB-EC	Arachis_valida|AravalEVm002519t1;Valsten1|AravsEVm002439t2;Arachis_hypogaea_Tifguard|ArahypEVm003208t8;Arachis_stenosperma|ArasteEVm002651t2;Arachis_hypogaea_SunOleic_97R|ArahypEVm003208t8
cluster303	5	Q651X6	GO:0009833; P:plant-type primary cell wall biogenesis; IBA:GO_Central	Arachis_valida|AravalEVm003576t1;Arachis_hypogaea_Tifguard|ArahypEVm001647t1;Arachis_hypogaea_SunOleic_97R|ArahypEVm001648t2;Arachis_valida|AravalEVm003512t4;Arachis_stenosperma|ArasteEVm002587t3
cluster304	5	P19109	GO:0016246; P:RNA interference; IMP:FlyBase	Arachis_valida|AravalEVm003137t5;Arachis_hypogaea_Tifguard|ArahypEVm004077t1;Arachis_stenosperma|ArasteEVm002739t1;Arachis_hypogaea_SunOleic_97R|ArahypEVm005414t2;Arachis_stenosperma|ArasteEVm005662t1
cluster305	5	N/A	N/A	Arachis_valida|AravalEVm052646t1;Valsten1|AravsEVm038090t1;Arachis_stenosperma|ArasteEVm034842t1;Arachis_hypogaea_SunOleic_97R|ArahypEVm021525t2;Arachis_hypogaea_SunOleic_97R|ArahypEVm021525t1
cluster306	5	A7PZL3	GO:0005975; P:carbohydrate metabolic process; IEA:InterPro	Arachis_valida|AravalEVm011856t6;Valsten1|AravsEVm042095t2;Arachis_valida|AravalEVm010973t1;Arachis_hypogaea_Tifguard|ArahypEVm006351t6;Arachis_hypogaea_Tifguard|ArahypEVm006351t5
cluster307	5	Q6JN47	GO:0050832; P:defense response to fungus; IDA:UniProtKB	Arachis_valida|AravalEVm005034t1;Arachis_hypogaea_Tifguard|ArahypEVm000323t4;Arachis_stenosperma|ArasteEVm000675t4;Arachis_hypogaea_SunOleic_97R|ArahypEVm000323t4;Arachis_stenosperma|ArasteEVm000675t2
cluster308	5	Q9FI21	GO:0009651; P:response to salt stress; IMP:UniProtKB	Arachis_valida|AravalEVm008272t1;Valsten1|AravsEVm005560t1;Arachis_stenosperma|ArasteEVm005881t3;Arachis_hypogaea_Tifguard|ArahypEVm004430t1;Arachis_hypogaea_SunOleic_97R|ArahypEVm004430t1
cluster309	5	A2XQE8	GO:0009739; P:response to gibberellin; IEA:EnsemblPlants	Arachis_valida|AravalEVm020295t1;Valsten1|AravsEVm013985t1;Arachis_hypogaea_Tifguard|ArahypEVm011105t1;Arachis_stenosperma|ArasteEVm014146t1;Arachis_hypogaea_SunOleic_97R|ArahypEVm011105t1
cluster310	5	Q6DYE5	GO:0016021; C:integral component of membrane; IEA:UniProtKB-KW	Arachis_valida|AravalEVm015319t1;Valsten1|AravsEVm010326t1;Arachis_hypogaea_Tifguard|ArahypEVm008350t2;Arachis_stenosperma|ArasteEVm010699t1;Arachis_hypogaea_SunOleic_97R|ArahypEVm008350t4
cluster311	5	Q93ZL5	GO:0006355; P:regulation of transcription, DNA-templated; TAS:TAIR	Arachis_valida|AravalEVm010213t1;Arachis_hypogaea_Tifguard|ArahypEVm028244t1;Arachis_hypogaea_SunOleic_97R|ArahypEVm028244t1;Arachis_valida|AravalEVm015783t1;Valsten1|AravsEVm010668t1
cluster312	5	Q88BD4	GO:0009103; P:lipopolysaccharide biosynthetic process; IEA:UniProtKB-UniPathway	Arachis_valida|AravalEVm005947t2;Arachis_hypogaea_SunOleic_97R|ArahypEVm002989t2;Arachis_hypogaea_SunOleic_97R|ArahypEVm002989t1;Arachis_hypogaea_SunOleic_97R|ArahypEVm002989t3;Arachis_hypogaea_SunOleic_97R|ArahypEVm002989t5
cluster313	5	Q2HEW5	GO:0016746; F:transferase activity, transferring acyl groups; IEA:UniProtKB-KW	Valsten1|AravsEVm004190t1;Arachis_valida|AravalEVm017522t2;Valsten1|AravsEVm001132t1;Arachis_stenosperma|ArasteEVm012427t2;Arachis_hypogaea_SunOleic_97R|ArahypEVm008762t1
cluster314	5	D6NTT4	GO:0048544; P:recognition of pollen; IEA:InterPro	Arachis_stenosperma|ArasteEVm001831t2;Arachis_stenosperma|ArasteEVm001831t3;Arachis_hypogaea_Tifguard|ArahypEVm000852t4;Arachis_hypogaea_Tifguard|ArahypEVm001050t5;Arachis_hypogaea_SunOleic_97R|ArahypEVm000852t4
cluster315	5	Q06394	GO:0006952; P:defense response; IEA:InterPro	Arachis_valida|AravalEVm053383t4;Valsten1|AravsEVm038710t5;Arachis_hypogaea_Tifguard|ArahypEVm025184t4;Arachis_hypogaea_SunOleic_97R|ArahypEVm025184t2;Arachis_hypogaea_SunOleic_97R|ArahypEVm025184t4
cluster316	5	A0A1P8B760	GO:0043864; F:indoleacetamide hydrolase activity; IEA:UniProtKB-EC	Arachis_valida|AravalEVm009050t3;Valsten1|AravsEVm006274t5;Arachis_valida|AravalEVm008839t3;Arachis_hypogaea_Tifguard|ArahypEVm004635t3;Arachis_hypogaea_SunOleic_97R|ArahypEVm004635t3
cluster317	5	Q94AR8	GO:0046686; P:response to cadmium ion; IEP:TAIR	Arachis_valida|AravalEVm010032t1;Valsten1|AravsEVm006717t4;Arachis_hypogaea_Tifguard|ArahypEVm006001t5;Arachis_hypogaea_SunOleic_97R|ArahypEVm006001t1;Arachis_hypogaea_SunOleic_97R|ArahypEVm006001t5
cluster318	5	Q8VZR7	GO:0009624; P:response to nematode; IEP:TAIR	Arachis_valida|AravalEVm007125t1;Valsten1|AravsEVm004589t1;Arachis_hypogaea_Tifguard|ArahypEVm003346t3;Arachis_stenosperma|ArasteEVm004865t2;Arachis_hypogaea_SunOleic_97R|ArahypEVm003346t2
cluster319	5	Q9CAD5	GO:0010098; P:suspensor development; IMP:UniProtKB	Arachis_valida|AravalEVm001966t3;Arachis_hypogaea_Tifguard|ArahypEVm002457t2;Arachis_stenosperma|ArasteEVm001662t3;Arachis_hypogaea_Tifguard|ArahypEVm002457t4;Arachis_stenosperma|ArasteEVm003697t1
cluster320	5	Q12436	GO:0071577; P:zinc ion transmembrane transport; IBA:GO_Central	Arachis_valida|AravalEVm007993t2;Valsten1|AravsEVm010345t3;Arachis_hypogaea_SunOleic_97R|ArahypEVm010574t1;Arachis_hypogaea_SunOleic_97R|ArahypEVm008069t1;Arachis_hypogaea_SunOleic_97R|ArahypEVm008069t5
cluster321	5	Q8LGU1	GO:0055085; P:transmembrane transport; IBA:GO_Central	Arachis_valida|AravalEVm000286t2;Arachis_stenosperma|ArasteEVm000223t3;Arachis_stenosperma|ArasteEVm000223t1;Arachis_hypogaea_Tifguard|ArahypEVm000093t2;Arachis_hypogaea_SunOleic_97R|ArahypEVm000093t2
cluster322	5	C0LGD7	GO:0004674; F:protein serine/threonine kinase activity; IEA:UniProtKB-KW	Arachis_valida|AravalEVm001671t3;Arachis_hypogaea_Tifguard|ArahypEVm002026t3;Arachis_stenosperma|ArasteEVm001190t7;Arachis_hypogaea_SunOleic_97R|ArahypEVm002026t6;Arachis_hypogaea_Tifguard|ArahypEVm002026t8
cluster323	5	Q6JN46	GO:0050832; P:defense response to fungus; IDA:UniProtKB	Arachis_valida|AravalEVm002272t3;Arachis_stenosperma|ArasteEVm015222t1;Arachis_hypogaea_SunOleic_97R|ArahypEVm000934t2;Arachis_hypogaea_SunOleic_97R|ArahypEVm000934t4;Arachis_hypogaea_SunOleic_97R|ArahypEVm000934t9
cluster324	5	Q39134	GO:0015802; P:basic amino acid transport; IDA:TAIR	Arachis_valida|AravalEVm010554t2;Valsten1|AravsEVm007807t8;Arachis_valida|AravalEVm012336t1;Arachis_hypogaea_Tifguard|ArahypEVm005970t1;Arachis_hypogaea_SunOleic_97R|ArahypEVm006592t1
cluster325	5	Q9LUG9	GO:2000762; P:regulation of phenylpropanoid metabolic process; IMP:TAIR	Arachis_valida|AravalEVm000440t3;Valsten1|AravsEVm000315t1;Arachis_stenosperma|ArasteEVm000341t13;Arachis_stenosperma|ArasteEVm000341t11;Arachis_hypogaea_SunOleic_97R|ArahypEVm000812t3
cluster326	5	Q40392	GO:0007165; P:signal transduction; IEA:InterPro	Arachis_valida|AravalEVm000723t6;Arachis_stenosperma|ArasteEVm000786t4;Arachis_hypogaea_SunOleic_97R|ArahypEVm002353t3;Valsten1|AravsEVm000677t7;Arachis_hypogaea_Tifguard|ArahypEVm002353t5
cluster327	5	Q8VZG8	GO:0046777; P:protein autophosphorylation; IBA:GO_Central	Arachis_valida|AravalEVm000971t5;Arachis_hypogaea_Tifguard|ArahypEVm000378t11;Arachis_stenosperma|ArasteEVm018011t2;Arachis_hypogaea_SunOleic_97R|ArahypEVm000378t8;Arachis_hypogaea_Tifguard|ArahypEVm000378t8
cluster328	5	O65709	GO:0046577; F:long-chain-alcohol oxidase activity; IEA:UniProtKB-EC	Arachis_valida|AravalEVm002837t1;Arachis_hypogaea_Tifguard|ArahypEVm001229t1;Arachis_stenosperma|ArasteEVm002584t2;Arachis_hypogaea_SunOleic_97R|ArahypEVm001229t1;Arachis_hypogaea_SunOleic_97R|ArahypEVm001669t9
cluster329	5	N/A	N/A	Arachis_valida|AravalEVm031795t2;Valsten1|AravsEVm021539t1;Arachis_hypogaea_Tifguard|ArahypEVm016462t4;Arachis_hypogaea_SunOleic_97R|ArahypEVm016462t1;Arachis_hypogaea_SunOleic_97R|ArahypEVm016462t4
cluster330	5	N/A	N/A	Arachis_valida|AravalEVm006948t9;Arachis_stenosperma|ArasteEVm011031t5;Arachis_hypogaea_SunOleic_97R|ArahypEVm003541t2;Valsten1|AravsEVm016095t6;Arachis_stenosperma|ArasteEVm011031t4
cluster331	5	N/A	N/A	Arachis_valida|AravalEVm043656t1;Arachis_stenosperma|ArasteEVm015388t2;Arachis_hypogaea_SunOleic_97R|ArahypEVm005405t7;Arachis_hypogaea_SunOleic_97R|ArahypEVm005405t14;Arachis_hypogaea_Tifguard|ArahypEVm005405t10
cluster332	5	Q948T9	GO:0004601; F:peroxidase activity; IEA:UniProtKB-KW	Arachis_valida|AravalEVm002120t4;Arachis_hypogaea_Tifguard|ArahypEVm005073t1;Arachis_stenosperma|ArasteEVm001574t2;Arachis_hypogaea_SunOleic_97R|ArahypEVm005073t1;Arachis_hypogaea_SunOleic_97R|ArahypEVm005073t3
cluster333	5	Q74ZH9	GO:0046475; P:glycerophospholipid catabolic process; IBA:GO_Central	Arachis_valida|AravalEVm008595t1;Valsten1|AravsEVm010270t2;Arachis_hypogaea_Tifguard|ArahypEVm008220t1;Arachis_stenosperma|ArasteEVm010599t1;Arachis_hypogaea_SunOleic_97R|ArahypEVm008220t1
cluster334	5	Q9SVC5	GO:0006355; P:regulation of transcription, DNA-templated; TAS:TAIR	Arachis_valida|AravalEVm023541t2;Arachis_hypogaea_Tifguard|ArahypEVm012599t2;Arachis_stenosperma|ArasteEVm045674t1;Arachis_hypogaea_SunOleic_97R|ArahypEVm012599t2;Arachis_hypogaea_SunOleic_97R|ArahypEVm012599t1
cluster335	5	Q25AG3	GO:0006952; P:defense response; IEA:UniProtKB-KW	Arachis_valida|AravalEVm002237t1;Valsten1|AravsEVm001945t1;Arachis_hypogaea_Tifguard|ArahypEVm001120t1;Arachis_stenosperma|ArasteEVm007189t1;Arachis_hypogaea_SunOleic_97R|ArahypEVm001262t1
cluster336	5	Q39030	GO:0009651; P:response to salt stress; IEP:TAIR	Arachis_valida|AravalEVm011626t5;Arachis_hypogaea_Tifguard|ArahypEVm006143t3;Arachis_stenosperma|ArasteEVm008155t1;Arachis_hypogaea_SunOleic_97R|ArahypEVm006143t3;Arachis_hypogaea_SunOleic_97R|ArahypEVm006143t4
cluster337	5	Q9FKS8	GO:0080167; P:response to karrikin; IEP:TAIR	Arachis_valida|AravalEVm013160t1;Valsten1|AravsEVm008685t3;Arachis_hypogaea_Tifguard|ArahypEVm007082t1;Arachis_stenosperma|ArasteEVm008741t4;Arachis_hypogaea_SunOleic_97R|ArahypEVm007082t1
cluster338	5	O65924	GO:0004674; F:protein serine/threonine kinase activity; IEA:UniProtKB-KW	Arachis_hypogaea_SunOleic_97R|ArahypEVm002763t2;Arachis_hypogaea_Tifguard|ArahypEVm008203t4;Arachis_hypogaea_Tifguard|ArahypEVm008203t2;Arachis_hypogaea_SunOleic_97R|ArahypEVm002763t6;Arachis_hypogaea_SunOleic_97R|ArahypEVm005080t7
cluster339	5	Q9FFH0	GO:0010380; P:regulation of chlorophyll biosynthetic process; IGI:TAIR	Arachis_valida|AravalEVm015929t2;Arachis_hypogaea_Tifguard|ArahypEVm027307t3;Arachis_stenosperma|ArasteEVm011060t2;Arachis_hypogaea_SunOleic_97R|ArahypEVm015582t2;Arachis_hypogaea_SunOleic_97R|ArahypEVm027307t3
cluster340	5	Q9M9X0	GO:0005886; C:plasma membrane; IEA:UniProtKB-SubCell	Arachis_valida|AravalEVm062034t1;Arachis_hypogaea_Tifguard|ArahypEVm000743t1;Arachis_hypogaea_SunOleic_97R|ArahypEVm006034t2;Valsten1|AravsEVm001329t5;Arachis_stenosperma|ArasteEVm048082t1
cluster341	5	Q6C7U8	GO:0006468; P:protein phosphorylation; IBA:GO_Central	Arachis_valida|AravalEVm022613t1;Arachis_stenosperma|ArasteEVm016336t1;Valsten1|AravsEVm010139t2;Arachis_hypogaea_SunOleic_97R|ArahypEVm008138t1;Arachis_valida|AravalEVm016222t1
cluster342	5	Q39262	GO:0006355; P:regulation of transcription, DNA-templated; TAS:TAIR	Arachis_valida|AravalEVm029709t1;Arachis_hypogaea_SunOleic_97R|ArahypEVm019815t1;Arachis_hypogaea_Tifguard|ArahypEVm014653t1;Arachis_stenosperma|ArasteEVm020418t1;Arachis_valida|AravalEVm029962t1
cluster343	5	Q9M9S4	GO:0004674; F:protein serine/threonine kinase activity; IEA:UniProtKB-KW	Arachis_valida|AravalEVm003536t1;Valsten1|AravsEVm002399t1;Arachis_stenosperma|ArasteEVm002235t3;Arachis_stenosperma|ArasteEVm001615t2;Arachis_stenosperma|ArasteEVm001615t5
cluster344	5	Q6WNQ8	GO:0016705; F:oxidoreductase activity, acting on paired donors, with incorporation or reduction of molecular oxygen; IEA:InterPro	Arachis_valida|AravalEVm009740t2;Valsten1|AravsEVm006887t1;Arachis_hypogaea_Tifguard|ArahypEVm004367t1;Arachis_hypogaea_SunOleic_97R|ArahypEVm005464t1;Arachis_hypogaea_SunOleic_97R|ArahypEVm004367t1
cluster345	5	P50694	GO:0008152; P:metabolic process; IEA:UniProtKB-KW	Arachis_valida|AravalEVm032574t3;Valsten1|AravsEVm022083t1;Arachis_hypogaea_Tifguard|ArahypEVm016789t3;Arachis_stenosperma|ArasteEVm021583t1;Arachis_hypogaea_SunOleic_97R|ArahypEVm016789t3
cluster346	5	Q6J540	GO:0019756; P:cyanogenic glycoside biosynthetic process; IDA:UniProtKB	Arachis_valida|AravalEVm009062t2;Valsten1|AravsEVm006144t1;Arachis_hypogaea_Tifguard|ArahypEVm003900t1;Arachis_hypogaea_SunOleic_97R|ArahypEVm003900t1;Valsten1|AravsEVm006144t3
cluster347	5	P30236	GO:0009651; P:response to salt stress; IBA:GO_Central	Arachis_valida|AravalEVm040247t1;Valsten1|AravsEVm027872t1;Arachis_hypogaea_Tifguard|ArahypEVm020016t1;Arachis_stenosperma|ArasteEVm026431t1;Arachis_hypogaea_SunOleic_97R|ArahypEVm020016t1
cluster348	5	Q9FGH9	GO:0009414; P:response to water deprivation; IMP:UniProtKB	Arachis_valida|AravalEVm004598t1;Valsten1|AravsEVm003193t2;Arachis_hypogaea_Tifguard|ArahypEVm001891t1;Arachis_hypogaea_SunOleic_97R|ArahypEVm002216t1;Arachis_hypogaea_SunOleic_97R|ArahypEVm001891t1
cluster349	5	N/A	N/A	Arachis_valida|AravalEVm006684t3;Valsten1|AravsEVm008216t1;Arachis_hypogaea_Tifguard|ArahypEVm005683t1;Arachis_stenosperma|ArasteEVm005374t2;Arachis_hypogaea_Tifguard|ArahypEVm005683t6
cluster350	5	E7NMM0	GO:0006730; P:one-carbon metabolic process; IEA:UniProtKB-KW	Arachis_valida|AravalEVm008339t1;Arachis_stenosperma|ArasteEVm004949t1;Arachis_hypogaea_SunOleic_97R|ArahypEVm003993t5;Arachis_hypogaea_SunOleic_97R|ArahypEVm003993t2;Valsten1|AravsEVm005279t8
cluster351	5	C0SVS4	GO:0006355; P:regulation of transcription, DNA-templated; TAS:TAIR	Arachis_valida|AravalEVm027574t1;Arachis_hypogaea_Tifguard|ArahypEVm014660t1;Arachis_stenosperma|ArasteEVm039594t2;Arachis_hypogaea_SunOleic_97R|ArahypEVm014660t1;Arachis_hypogaea_SunOleic_97R|ArahypEVm014660t4
cluster352	5	A1CP80	GO:0046982; F:protein heterodimerization activity; IEA:InterPro	Arachis_valida|AravalEVm045258t2;Arachis_stenosperma|ArasteEVm009812t2;Arachis_hypogaea_SunOleic_97R|ArahypEVm024001t2;Arachis_hypogaea_SunOleic_97R|ArahypEVm024001t1;Valsten1|AravsEVm004931t2
cluster353	5	N/A	N/A	Valsten1|AravsEVm004149t2;Valsten1|AravsEVm004149t5;Arachis_hypogaea_Tifguard|ArahypEVm002937t6;Arachis_hypogaea_Tifguard|ArahypEVm002937t3;Arachis_stenosperma|ArasteEVm009463t4
cluster354	5	F4ICB6	GO:2000031; P:regulation of salicylic acid mediated signaling pathway; IMP:UniProtKB	Valsten1|AravsEVm003194t6;Valsten1|AravsEVm003194t3;Arachis_stenosperma|ArasteEVm003519t8;Arachis_stenosperma|ArasteEVm003519t9;Arachis_hypogaea_SunOleic_97R|ArahypEVm002689t8
cluster355	5	Q9STT5	GO:0006869; P:lipid transport; IBA:GO_Central	Arachis_hypogaea_Tifguard|ArahypEVm000669t1;Arachis_hypogaea_Tifguard|ArahypEVm000669t2;Arachis_hypogaea_Tifguard|ArahypEVm000669t5;Arachis_hypogaea_SunOleic_97R|ArahypEVm000669t1;Arachis_hypogaea_SunOleic_97R|ArahypEVm000669t5
cluster356	5	O82569	GO:0006417; P:regulation of translation; IEA:UniProtKB-KW	Arachis_hypogaea_Tifguard|ArahypEVm024499t1;Arachis_hypogaea_Tifguard|ArahypEVm024499t2;Arachis_stenosperma|ArasteEVm027536t1;Arachis_hypogaea_SunOleic_97R|ArahypEVm024499t2;Arachis_hypogaea_SunOleic_97R|ArahypEVm024499t1
cluster357	5	N/A	N/A	Arachis_hypogaea_Tifguard|ArahypEVm010311t3;Arachis_hypogaea_Tifguard|ArahypEVm010311t1;Arachis_hypogaea_Tifguard|ArahypEVm010311t2;Arachis_hypogaea_Tifguard|ArahypEVm010311t4;Arachis_stenosperma|ArasteEVm015517t2
cluster358	5	Q7XAP4	GO:0015969; P:guanosine tetraphosphate metabolic process; IEA:InterPro	Arachis_hypogaea_Tifguard|ArahypEVm003113t8;Arachis_hypogaea_Tifguard|ArahypEVm003113t12;Valsten1|AravsEVm001572t3;Arachis_stenosperma|ArasteEVm004379t7;Arachis_valida|AravalEVm007924t4
cluster359	5	Q7XA42	GO:0006952; P:defense response; IEA:UniProtKB-KW	Arachis_stenosperma|ArasteEVm000812t6;Arachis_stenosperma|ArasteEVm013363t4;Arachis_stenosperma|ArasteEVm013363t5;Arachis_stenosperma|ArasteEVm013363t8;Valsten1|AravsEVm009046t8
cluster360	5	C6L7U1	GO:0009877; P:nodulation; IEA:UniProtKB-KW	Arachis_stenosperma|ArasteEVm000334t3;Arachis_stenosperma|ArasteEVm000334t14;Arachis_stenosperma|ArasteEVm000334t7;Arachis_stenosperma|ArasteEVm000334t9;Valsten1|AravsEVm031042t2
cluster361	5	Q7Q0Q1	GO:0006270; P:DNA replication initiation; IEA:InterPro	Arachis_stenosperma|ArasteEVm006763t1;Arachis_stenosperma|ArasteEVm002855t1;Arachis_stenosperma|ArasteEVm005754t1;Valsten1|AravsEVm012297t4;Arachis_hypogaea_SunOleic_97R|ArahypEVm013590t1
cluster362	5	F4KGY6	GO:0006355; P:regulation of transcription, DNA-templated; TAS:TAIR	Arachis_hypogaea_SunOleic_97R|ArahypEVm010600t1;Arachis_hypogaea_SunOleic_97R|ArahypEVm010600t2;Valsten1|AravsEVm013149t1;Arachis_valida|AravalEVm014830t3;Arachis_stenosperma|ArasteEVm021544t1
cluster363	5	N/A	N/A	Arachis_hypogaea_SunOleic_97R|ArahypEVm006241t1;Arachis_hypogaea_SunOleic_97R|ArahypEVm006166t1;Arachis_hypogaea_SunOleic_97R|ArahypEVm006241t2;Valsten1|AravsEVm007242t2;Arachis_stenosperma|ArasteEVm006070t1
cluster364	5	N/A	N/A	Arachis_hypogaea_SunOleic_97R|ArahypEVm009408t3;Arachis_hypogaea_SunOleic_97R|ArahypEVm009408t1;Arachis_hypogaea_SunOleic_97R|ArahypEVm009408t11;Arachis_hypogaea_SunOleic_97R|ArahypEVm009408t2;Arachis_stenosperma|ArasteEVm011946t4
cluster365	5	N/A	N/A	Arachis_hypogaea_SunOleic_97R|ArahypEVm013919t4;Arachis_hypogaea_SunOleic_97R|ArahypEVm013919t3;Arachis_hypogaea_SunOleic_97R|ArahypEVm013919t5;Arachis_hypogaea_Tifguard|ArahypEVm017494t2;Arachis_stenosperma|ArasteEVm005608t4
cluster366	5	Q7M3S9	GO:0046872; F:metal ion binding; IEA:UniProtKB-KW	Valsten1|AravsEVm008197t2;Arachis_hypogaea_Tifguard|ArahypEVm006390t5;Arachis_stenosperma|ArasteEVm009683t2;Arachis_hypogaea_SunOleic_97R|ArahypEVm010351t2;Arachis_stenosperma|ArasteEVm009875t6
cluster367	5	Q93YQ1	GO:0031929; P:TOR signaling; IBA:GO_Central	Valsten1|AravsEVm013380t5;Arachis_stenosperma|ArasteEVm000318t2;Arachis_hypogaea_SunOleic_97R|ArahypEVm000433t3;Arachis_stenosperma|ArasteEVm000318t3;Arachis_valida|AravalEVm000387t2
cluster368	5	Q8RXN5	GO:0008033; P:tRNA processing; IEA:UniProtKB-KW	Valsten1|AravsEVm003619t3;Arachis_hypogaea_Tifguard|ArahypEVm002349t3;Arachis_stenosperma|ArasteEVm003631t7;Arachis_hypogaea_SunOleic_97R|ArahypEVm008465t3;Arachis_hypogaea_SunOleic_97R|ArahypEVm008465t1
cluster369	5	Q9LNG5	GO:0004721; F:phosphoprotein phosphatase activity; IEA:UniProtKB-KW	Valsten1|AravsEVm031881t1;Arachis_stenosperma|ArasteEVm003240t1;Arachis_hypogaea_Tifguard|ArahypEVm024180t1;Arachis_hypogaea_SunOleic_97R|ArahypEVm024180t1;Arachis_valida|AravalEVm021807t1
cluster370	4	Q8I7P9	GO:0006313; P:transposition, DNA-mediated; NAS:UniProtKB	Arachis_valida|AravalEVm020335t1;Arachis_valida|AravalEVm019685t1;Arachis_valida|AravalEVm020496t2;Arachis_valida|AravalEVm036830t2
cluster371	4	P50998	GO:0032264; P:IMP salvage; IEA:UniProtKB-UniPathway	Arachis_valida|AravalEVm020283t2;Arachis_valida|AravalEVm002349t3;Arachis_valida|AravalEVm002349t4;Arachis_valida|AravalEVm002349t5
cluster372	4	Q6WP49	GO:0009405; P:pathogenesis; IEA:UniProtKB-KW	Arachis_valida|AravalEVm009370t1;Arachis_valida|AravalEVm008765t1;Arachis_valida|AravalEVm009958t1;Arachis_valida|AravalEVm033913t1
cluster373	4	P19515	GO:0016042; P:lipid catabolic process; IEA:UniProtKB-KW	Arachis_valida|AravalEVm011423t1;Arachis_valida|AravalEVm011680t2;Valsten1|AravsEVm007663t5;Arachis_stenosperma|ArasteEVm008226t5
cluster374	4	Q38956	GO:0006855; P:drug transmembrane transport; IBA:GO_Central	Arachis_valida|AravalEVm009893t5;Arachis_valida|AravalEVm009893t1;Arachis_valida|AravalEVm009893t2;Arachis_valida|AravalEVm009893t3
cluster375	4	P25985	GO:0009607; P:response to biotic stimulus; IEA:UniProtKB-KW	Arachis_valida|AravalEVm068589t3;Arachis_valida|AravalEVm068589t1;Arachis_valida|AravalEVm068589t4;Arachis_valida|AravalEVm068589t5
cluster376	4	P45458	GO:0006099; P:tricarboxylic acid cycle; IEA:UniProtKB-KW	Arachis_valida|AravalEVm007536t1;Arachis_valida|AravalEVm008396t2;Arachis_valida|AravalEVm008461t3;Arachis_valida|AravalEVm013868t1
cluster377	4	O43081	GO:1903710; P:spermine transmembrane transport; IC:PomBase	Arachis_valida|AravalEVm012412t3;Arachis_valida|AravalEVm009401t1;Arachis_valida|AravalEVm011401t1;Arachis_valida|AravalEVm011401t2
cluster378	4	P24288	GO:0009099; P:valine biosynthetic process; IBA:GO_Central	Arachis_valida|AravalEVm014732t1;Arachis_valida|AravalEVm016041t2;Arachis_valida|AravalEVm016179t1;Arachis_valida|AravalEVm021679t1
cluster379	4	Q96VH4	GO:0034599; P:cellular response to oxidative stress; IEA:InterPro	Arachis_valida|AravalEVm029009t1;Arachis_valida|AravalEVm031056t1;Arachis_valida|AravalEVm037353t1;Arachis_valida|AravalEVm038371t1
cluster380	4	P28976	GO:0006351; P:transcription, DNA-templated; IEA:InterPro	Arachis_valida|AravalEVm000016t2;Arachis_valida|AravalEVm000016t1;Arachis_valida|AravalEVm000016t3;Valsten1|AravsEVm000025t1
cluster381	4	O13395	GO:0031505; P:fungal-type cell wall organization; IBA:GO_Central	Arachis_valida|AravalEVm027627t1;Arachis_valida|AravalEVm000212t4;Arachis_valida|AravalEVm000772t2;Arachis_valida|AravalEVm005451t1
cluster382	4	N/A	N/A	Arachis_valida|AravalEVm008929t7;Arachis_valida|AravalEVm008929t5;Arachis_valida|AravalEVm008929t6;Valsten1|AravsEVm013870t1
cluster383	4	Q41709	GO:0006826; P:iron ion transport; IEA:InterPro	Arachis_valida|AravalEVm029975t2;Arachis_valida|AravalEVm030389t3;Arachis_hypogaea_Tifguard|ArahypEVm016327t1;Arachis_hypogaea_SunOleic_97R|ArahypEVm016327t1
cluster384	4	P23542	GO:0006536; P:glutamate metabolic process; ISS:UniProtKB	Arachis_valida|AravalEVm015476t1;Arachis_valida|AravalEVm013284t1;Arachis_valida|AravalEVm015817t1;Arachis_valida|AravalEVm017031t1
cluster385	4	D0VKF5	GO:0030245; P:cellulose catabolic process; IEA:UniProtKB-UniPathway	Arachis_valida|AravalEVm002136t1;Arachis_valida|AravalEVm002293t1;Arachis_valida|AravalEVm009534t1;Arachis_valida|AravalEVm002539t1
cluster386	4	Q00310	GO:0006493; P:protein O-linked glycosylation; IDA:CGD	Arachis_valida|AravalEVm055242t1;Arachis_valida|AravalEVm010109t1;Arachis_valida|AravalEVm017171t1;Arachis_valida|AravalEVm035896t1
cluster387	4	P34227	GO:0046686; P:response to cadmium ion; IMP:SGD	Arachis_valida|AravalEVm036204t1;Arachis_valida|AravalEVm030080t1;Arachis_valida|AravalEVm035685t2;Arachis_valida|AravalEVm036442t1
cluster388	4	P49299	GO:0006099; P:tricarboxylic acid cycle; IEA:UniProtKB-KW	Arachis_valida|AravalEVm009561t1;Arachis_valida|AravalEVm011784t1;Arachis_valida|AravalEVm011506t1;Arachis_valida|AravalEVm012094t1
cluster389	4	P38720	GO:0009051; P:pentose-phosphate shunt, oxidative branch; IMP:SGD	Arachis_valida|AravalEVm010701t4;Arachis_valida|AravalEVm010701t5;Arachis_valida|AravalEVm011176t1;Valsten1|AravsEVm013753t1
cluster390	4	Q3EBR6	GO:0016042; P:lipid catabolic process; IEA:UniProtKB-KW	Arachis_valida|AravalEVm010660t2;Arachis_valida|AravalEVm009208t1;Arachis_valida|AravalEVm013447t1;Arachis_stenosperma|ArasteEVm008993t2
cluster391	4	Q6T267	GO:0006099; P:tricarboxylic acid cycle; IEA:UniProtKB-KW	Arachis_valida|AravalEVm008554t1;Arachis_valida|AravalEVm006490t3;Arachis_valida|AravalEVm006518t1;Arachis_valida|AravalEVm007223t1
cluster392	4	P83778	GO:0006099; P:tricarboxylic acid cycle; NAS:CGD	Arachis_valida|AravalEVm022086t2;Arachis_valida|AravalEVm021027t1;Arachis_valida|AravalEVm021102t1;Arachis_valida|AravalEVm022086t1
cluster393	4	Q12598	GO:0003985; F:acetyl-CoA C-acetyltransferase activity; IEA:UniProtKB-EC	Arachis_valida|AravalEVm016029t1;Arachis_valida|AravalEVm016384t1;Arachis_valida|AravalEVm021555t1;Arachis_valida|AravalEVm031541t1
cluster394	4	P20654	GO:0000022; P:mitotic spindle elongation; IMP:AspGD	Arachis_valida|AravalEVm024527t1;Arachis_valida|AravalEVm010910t1;Arachis_stenosperma|ArasteEVm007873t3;Arachis_hypogaea_SunOleic_97R|ArahypEVm011938t3
cluster395	4	O14301	GO:0030836; P:positive regulation of actin filament depolymerization; IBA:GO_Central	Arachis_valida|AravalEVm006178t1;Arachis_valida|AravalEVm006216t1;Arachis_stenosperma|ArasteEVm004589t1;Arachis_hypogaea_Tifguard|ArahypEVm002226t4
cluster396	4	N/A	N/A	Arachis_valida|AravalEVm014328t4;Arachis_valida|AravalEVm014328t1;Arachis_valida|AravalEVm014328t2;Arachis_valida|AravalEVm014328t8
cluster397	4	P32599	GO:0070649; P:formin-nucleated actin cable assembly; IMP:SGD	Arachis_valida|AravalEVm005294t2;Arachis_valida|AravalEVm005235t1;Arachis_valida|AravalEVm005294t5;Arachis_stenosperma|ArasteEVm003758t1
cluster398	4	P36188	GO:0007519; P:skeletal muscle tissue development; IMP:FlyBase	Arachis_valida|AravalEVm044322t6;Arachis_valida|AravalEVm044322t5;Arachis_valida|AravalEVm044322t8;Arachis_valida|AravalEVm044322t3
cluster399	4	P23955	GO:0006627; P:protein processing involved in protein targeting to mitochondrion; IBA:GO_Central	Arachis_valida|AravalEVm007186t2;Arachis_valida|AravalEVm015602t1;Arachis_valida|AravalEVm010101t3;Arachis_stenosperma|ArasteEVm011011t1
cluster400	4	O01367	GO:0007284; P:spermatogonial cell division; IMP:FlyBase	Arachis_valida|AravalEVm020245t1;Arachis_valida|AravalEVm016347t1;Arachis_valida|AravalEVm016347t2;Arachis_valida|AravalEVm032716t1
cluster401	4	Q8LHP0	GO:0006368; P:transcription elongation from RNA polymerase II promoter; IBA:GO_Central	Arachis_valida|AravalEVm058057t2;Arachis_valida|AravalEVm058057t3;Valsten1|AravsEVm070319t3;Arachis_stenosperma|ArasteEVm058969t1
cluster402	4	Q9M0A5	GO:0019760; P:glucosinolate metabolic process; IMP:TAIR	Arachis_valida|AravalEVm030677t1;Arachis_valida|AravalEVm026737t2;Arachis_valida|AravalEVm030677t2;Arachis_valida|AravalEVm024474t1
cluster403	4	A8MRC7	GO:0006486; P:protein glycosylation; IBA:GO_Central	Arachis_valida|AravalEVm017799t2;Arachis_valida|AravalEVm017799t1;Arachis_stenosperma|ArasteEVm014291t4;Arachis_stenosperma|ArasteEVm010805t3
cluster404	4	Q75AP7	GO:0002181; P:cytoplasmic translation; IBA:GO_Central	Arachis_valida|AravalEVm027046t5;Arachis_valida|AravalEVm027046t2;Arachis_valida|AravalEVm027046t6;Valsten1|AravsEVm021015t2
cluster405	4	Q8H0Z4	GO:2000032; P:regulation of secondary shoot formation; IMP:TAIR	Arachis_valida|AravalEVm014193t1;Arachis_valida|AravalEVm014193t17;Arachis_valida|AravalEVm014193t4;Arachis_valida|AravalEVm014301t2
cluster406	4	P40341	GO:0006465; P:signal peptide processing; IMP:SGD	Arachis_valida|AravalEVm002033t2;Arachis_valida|AravalEVm001965t1;Arachis_stenosperma|ArasteEVm002998t1;Valsten1|AravsEVm002875t4
cluster407	4	Q09127	GO:0000027; P:ribosomal large subunit assembly; IBA:GO_Central	Arachis_valida|AravalEVm035907t2;Arachis_valida|AravalEVm035907t8;Arachis_valida|AravalEVm035907t6;Arachis_stenosperma|ArasteEVm023944t1
cluster408	4	F4HW17	GO:0009624; P:response to nematode; IEP:UniProtKB	Arachis_valida|AravalEVm006742t2;Arachis_valida|AravalEVm009553t1;Arachis_valida|AravalEVm009553t2;Arachis_stenosperma|ArasteEVm004869t5
cluster409	4	Q95X01	GO:0005975; P:carbohydrate metabolic process; IEA:InterPro	Arachis_valida|AravalEVm026846t1;Arachis_valida|AravalEVm007487t2;Arachis_valida|AravalEVm007487t5;Arachis_valida|AravalEVm007487t4
cluster410	4	B8M9K0	GO:0016787; F:hydrolase activity; IEA:UniProtKB-KW	Arachis_valida|AravalEVm031481t1;Arachis_valida|AravalEVm032068t1;Arachis_valida|AravalEVm032539t1;Valsten1|AravsEVm021880t1
cluster411	4	A1CXT5	GO:0070084; P:protein initiator methionine removal; IEA:UniProtKB-UniRule	Arachis_valida|AravalEVm013208t1;Arachis_valida|AravalEVm013214t3;Arachis_hypogaea_Tifguard|ArahypEVm007821t3;Arachis_stenosperma|ArasteEVm008507t1
cluster412	4	Q9EQ60	GO:0019233; P:sensory perception of pain; IMP:RGD	Arachis_valida|AravalEVm012175t1;Arachis_valida|AravalEVm001223t1;Arachis_valida|AravalEVm001993t3;Arachis_valida|AravalEVm002836t1
cluster413	4	Q0WRW8	GO:0055114; P:oxidation-reduction process; IEA:UniProtKB-KW	Arachis_valida|AravalEVm007102t1;Arachis_valida|AravalEVm007102t3;Arachis_valida|AravalEVm015380t3;Arachis_hypogaea_SunOleic_97R|ArahypEVm016511t1
cluster414	4	Q17127	GO:0045735; F:nutrient reservoir activity; IEA:UniProtKB-KW	Arachis_valida|AravalEVm003628t2;Arachis_valida|AravalEVm003122t1;Arachis_valida|AravalEVm003405t1;Arachis_valida|AravalEVm003441t2
cluster415	4	Q9SXA6	GO:0090502; P:RNA phosphodiester bond hydrolysis, endonucleolytic; IDA:UniProtKB	Arachis_valida|AravalEVm023654t3;Arachis_valida|AravalEVm023654t1;Arachis_hypogaea_Tifguard|ArahypEVm014293t1;Arachis_hypogaea_SunOleic_97R|ArahypEVm014293t1
cluster416	4	P0DMQ6	GO:0006062; P:sorbitol catabolic process; IDA:AgBase	Arachis_valida|AravalEVm017117t1;Arachis_valida|AravalEVm015553t1;Arachis_valida|AravalEVm016938t1;Arachis_valida|AravalEVm017175t1
cluster417	4	Q93ZR8	GO:0006486; P:protein glycosylation; IEA:UniProtKB-UniPathway	Arachis_valida|AravalEVm009984t1;Arachis_valida|AravalEVm009984t3;Arachis_stenosperma|ArasteEVm005314t3;Arachis_stenosperma|ArasteEVm005314t4
cluster418	4	P87153	GO:0006457; P:protein folding; ISO:PomBase	Arachis_valida|AravalEVm007642t1;Arachis_valida|AravalEVm007396t1;Arachis_valida|AravalEVm007552t1;Arachis_valida|AravalEVm011877t1
cluster419	4	P32110	GO:0010038; P:response to metal ion; TAS:AgBase	Arachis_valida|AravalEVm027225t1;Arachis_valida|AravalEVm027225t7;Arachis_valida|AravalEVm027225t8;Arachis_hypogaea_SunOleic_97R|ArahypEVm017844t1
cluster420	4	P46032	GO:0042939; P:tripeptide transport; IDA:TAIR	Arachis_valida|AravalEVm007272t1;Arachis_valida|AravalEVm007272t2;Valsten1|AravsEVm004928t3;Arachis_stenosperma|ArasteEVm021697t1
cluster421	4	Q9P8I0	GO:0010133; P:proline catabolic process to glutamate; IEA:UniProtKB-UniPathway	Arachis_valida|AravalEVm007103t1;Arachis_valida|AravalEVm007098t2;Arachis_valida|AravalEVm007371t1;Arachis_valida|AravalEVm014346t1
cluster422	4	P43090	GO:0001666; P:response to hypoxia; ISS:UniProtKB	Arachis_valida|AravalEVm005921t3;Arachis_valida|AravalEVm005443t1;Arachis_valida|AravalEVm013460t2;Arachis_valida|AravalEVm011345t1
cluster423	4	P07872	GO:0000038; P:very long-chain fatty acid metabolic process; IBA:GO_Central	Arachis_valida|AravalEVm004269t1;Arachis_valida|AravalEVm004868t2;Arachis_valida|AravalEVm008222t1;Arachis_valida|AravalEVm009714t4
cluster424	4	O82752	GO:0006855; P:drug transmembrane transport; IBA:GO_Central	Arachis_valida|AravalEVm007949t2;Arachis_valida|AravalEVm007949t3;Arachis_valida|AravalEVm007949t4;Valsten1|AravsEVm006689t1
cluster425	4	P09848	GO:0044245; P:polysaccharide digestion; TAS:Reactome	Arachis_valida|AravalEVm002891t1;Arachis_valida|AravalEVm002891t2;Arachis_valida|AravalEVm002891t6;Valsten1|AravsEVm014918t3
cluster426	4	Q10147	GO:0006457; P:protein folding; ISO:PomBase	Arachis_valida|AravalEVm008849t1;Arachis_valida|AravalEVm008962t1;Arachis_stenosperma|ArasteEVm006402t2;Arachis_stenosperma|ArasteEVm006402t3
cluster427	4	Q9VQG8	GO:0016192; P:vesicle-mediated transport; IMP:FlyBase	Arachis_valida|AravalEVm011822t2;Arachis_valida|AravalEVm011822t1;Arachis_valida|AravalEVm024644t1;Arachis_valida|AravalEVm030998t1
cluster428	4	N/A	N/A	Arachis_valida|AravalEVm039377t4;Arachis_valida|AravalEVm039377t2;Arachis_valida|AravalEVm039377t5;Arachis_valida|AravalEVm035764t1
cluster429	4	Q96VN3	GO:0006606; P:protein import into nucleus; IBA:GO_Central	Arachis_valida|AravalEVm045554t1;Arachis_valida|AravalEVm045554t4;Arachis_valida|AravalEVm066196t1;Arachis_valida|AravalEVm068464t1
cluster430	4	A0A2Z5TIQ0	GO:0016491; F:oxidoreductase activity; IEA:InterPro	Arachis_valida|AravalEVm019885t1;Arachis_valida|AravalEVm019612t1;Arachis_valida|AravalEVm019705t1;Arachis_hypogaea_Tifguard|ArahypEVm012519t1
cluster431	4	Q9LTS3	GO:0009823; P:cytokinin catabolic process; TAS:TAIR	Arachis_valida|AravalEVm008642t2;Arachis_valida|AravalEVm008642t3;Arachis_valida|AravalEVm008642t5;Arachis_hypogaea_SunOleic_97R|ArahypEVm008667t1
cluster432	4	Q00624	GO:0016491; F:oxidoreductase activity; IEA:UniProtKB-KW	Arachis_valida|AravalEVm008359t2;Arachis_valida|AravalEVm008349t1;Valsten1|AravsEVm054709t1;Arachis_hypogaea_SunOleic_97R|ArahypEVm005719t5
cluster433	4	D4B327	GO:0006869; P:lipid transport; IEA:UniProtKB-KW	Arachis_valida|AravalEVm023105t1;Arachis_valida|AravalEVm016388t1;Arachis_valida|AravalEVm022913t2;Arachis_valida|AravalEVm009501t1
cluster434	4	N/A	N/A	Arachis_valida|AravalEVm010602t1;Arachis_valida|AravalEVm015677t2;Arachis_valida|AravalEVm024020t2;Arachis_valida|AravalEVm034766t1
cluster435	4	P52495	GO:0004839; F:ubiquitin activating enzyme activity; IEA:UniProtKB-EC	Arachis_valida|AravalEVm001202t3;Arachis_valida|AravalEVm001202t2;Arachis_valida|AravalEVm002840t1;Arachis_stenosperma|ArasteEVm004112t5
cluster436	4	P62330	GO:0016192; P:vesicle-mediated transport; IBA:GO_Central	Arachis_valida|AravalEVm044106t1;Arachis_valida|AravalEVm044318t1;Arachis_valida|AravalEVm044769t1;Valsten1|AravsEVm029393t4
cluster437	4	O93937	GO:0006228; P:UTP biosynthetic process; IBA:GO_Central	Arachis_valida|AravalEVm001193t1;Arachis_valida|AravalEVm000738t2;Arachis_valida|AravalEVm010202t3;Arachis_stenosperma|ArasteEVm031855t1
cluster438	4	O74839	GO:0006874; P:cellular calcium ion homeostasis; IMP:PomBase	Arachis_valida|AravalEVm001696t1;Arachis_valida|AravalEVm001470t1;Arachis_valida|AravalEVm002401t2;Arachis_stenosperma|ArasteEVm006582t2
cluster439	4	O62619	GO:0007525; P:somatic muscle development; IMP:FlyBase	Arachis_valida|AravalEVm007181t1;Arachis_valida|AravalEVm007181t4;Arachis_valida|AravalEVm009011t1;Arachis_hypogaea_Tifguard|ArahypEVm003884t5
cluster440	4	Q9SUV2	GO:0008643; P:carbohydrate transport; IEA:UniProtKB-KW	Arachis_valida|AravalEVm016272t1;Arachis_valida|AravalEVm018408t1;Arachis_stenosperma|ArasteEVm011933t2;Arachis_hypogaea_Tifguard|ArahypEVm014274t5
cluster441	4	Q9FNX8	GO:0080086; P:stamen filament development; IGI:TAIR	Arachis_valida|AravalEVm001850t5;Arachis_valida|AravalEVm001850t2;Arachis_valida|AravalEVm002001t2;Arachis_hypogaea_SunOleic_97R|ArahypEVm015697t1
cluster442	4	Q9LMP1	GO:0009826; P:unidimensional cell growth; IMP:TAIR	Arachis_valida|AravalEVm003689t1;Arachis_valida|AravalEVm003689t2;Arachis_hypogaea_Tifguard|ArahypEVm001559t3;Arachis_hypogaea_SunOleic_97R|ArahypEVm001559t4
cluster443	4	Q8BG39	GO:0006836; P:neurotransmitter transport; IEA:UniProtKB-KW	Arachis_valida|AravalEVm009308t1;Arachis_valida|AravalEVm008122t1;Arachis_valida|AravalEVm010294t1;Arachis_stenosperma|ArasteEVm005060t1
cluster444	4	F4I507	GO:0030048; P:actin filament-based movement; TAS:TAIR	Arachis_valida|AravalEVm000627t7;Arachis_valida|AravalEVm000627t1;Arachis_valida|AravalEVm000627t4;Arachis_stenosperma|ArasteEVm001055t2
cluster445	4	Q9ASR4	GO:0004084; F:branched-chain-amino-acid transaminase activity; IBA:GO_Central	Arachis_valida|AravalEVm012443t2;Arachis_valida|AravalEVm012443t4;Arachis_valida|AravalEVm012443t6;Arachis_hypogaea_Tifguard|ArahypEVm003795t3
cluster446	4	N/A	N/A	Arachis_valida|AravalEVm027598t13;Arachis_valida|AravalEVm027598t5;Arachis_valida|AravalEVm027598t7;Arachis_valida|AravalEVm027598t9
cluster447	4	Q07994	GO:0003958; F:NADPH-hemoprotein reductase activity; IEA:UniProtKB-UniRule	Arachis_valida|AravalEVm004639t1;Arachis_valida|AravalEVm004343t1;Arachis_valida|AravalEVm016701t1;Arachis_stenosperma|ArasteEVm004231t3
cluster448	4	P34737	GO:0006412; P:translation; IEA:InterPro	Arachis_valida|AravalEVm044737t1;Arachis_valida|AravalEVm052970t1;Valsten1|AravsEVm030708t3;Arachis_stenosperma|ArasteEVm035294t3
cluster449	4	Q01373	GO:0006635; P:fatty acid beta-oxidation; IEA:UniProtKB-UniPathway	Arachis_valida|AravalEVm001989t3;Arachis_valida|AravalEVm001964t1;Arachis_hypogaea_Tifguard|ArahypEVm016099t4;Arachis_stenosperma|ArasteEVm002897t1
cluster450	4	P32178	GO:0006571; P:tyrosine biosynthetic process; IMP:SGD	Arachis_valida|AravalEVm021906t2;Arachis_valida|AravalEVm030166t1;Arachis_hypogaea_Tifguard|ArahypEVm012292t3;Arachis_hypogaea_SunOleic_97R|ArahypEVm012292t3
cluster451	4	Q01372	GO:0006414; P:translational elongation; IBA:GO_Central	Arachis_valida|AravalEVm065444t1;Arachis_valida|AravalEVm065444t2;Arachis_valida|AravalEVm065444t3;Arachis_stenosperma|ArasteEVm031740t3
cluster452	4	Q9SCU0	GO:0016491; F:oxidoreductase activity; IEA:UniProtKB-KW	Arachis_valida|AravalEVm024267t2;Arachis_valida|AravalEVm024267t3;Arachis_valida|AravalEVm024267t4;Arachis_hypogaea_SunOleic_97R|ArahypEVm014162t1
cluster453	4	Q05493	GO:0010124; P:phenylacetate catabolic process; IBA:GO_Central	Arachis_valida|AravalEVm014945t1;Arachis_valida|AravalEVm014872t1;Arachis_valida|AravalEVm014911t3;Arachis_stenosperma|ArasteEVm009371t4
cluster454	4	D4AUX6	GO:0006629; P:lipid metabolic process; IEA:InterPro	Arachis_valida|AravalEVm019960t1;Arachis_valida|AravalEVm012036t1;Arachis_valida|AravalEVm013484t1;Arachis_valida|AravalEVm018687t1
cluster455	4	Q9FVQ4	GO:0010118; P:stomatal movement; IMP:TAIR	Arachis_valida|AravalEVm009594t2;Arachis_valida|AravalEVm009594t3;Arachis_valida|AravalEVm009594t4;Valsten1|AravsEVm013618t3
cluster456	4	Q9LH50	GO:0080092; P:regulation of pollen tube growth; IMP:TAIR	Arachis_valida|AravalEVm038605t1;Arachis_valida|AravalEVm038619t1;Arachis_hypogaea_Tifguard|ArahypEVm014801t2;Arachis_stenosperma|ArasteEVm031239t1
cluster457	4	N/A	N/A	Arachis_valida|AravalEVm024403t1;Arachis_valida|AravalEVm020145t3;Arachis_valida|AravalEVm024403t2;Arachis_valida|AravalEVm020145t5
cluster458	4	N/A	N/A	Arachis_valida|AravalEVm000596t5;Arachis_valida|AravalEVm000596t1;Arachis_valida|AravalEVm000596t4;Arachis_stenosperma|ArasteEVm000477t8
cluster459	4	A2QMY6	GO:0004784; F:superoxide dismutase activity; IEA:UniProtKB-EC	Arachis_valida|AravalEVm052608t2;Arachis_valida|AravalEVm052568t1;Arachis_valida|AravalEVm042377t3;Arachis_valida|AravalEVm042377t2
cluster460	4	P36616	GO:0000245; P:spliceosomal complex assembly; IBA:GO_Central	Arachis_valida|AravalEVm007279t1;Arachis_valida|AravalEVm007389t1;Arachis_valida|AravalEVm007389t5;Arachis_valida|AravalEVm017382t1
cluster461	4	Q9JHI5	GO:0006552; P:leucine catabolic process; ISO:MGI	Arachis_valida|AravalEVm014572t1;Arachis_valida|AravalEVm014063t1;Arachis_valida|AravalEVm014371t1;Arachis_hypogaea_SunOleic_97R|ArahypEVm010161t2
cluster462	4	Q6QGC0	GO:0007507; P:heart development; IEA:Ensembl	Arachis_valida|AravalEVm017213t6;Arachis_valida|AravalEVm017213t1;Arachis_valida|AravalEVm017213t2;Arachis_valida|AravalEVm017213t7
cluster463	4	Q40392	GO:0007165; P:signal transduction; IEA:InterPro	Arachis_valida|AravalEVm005532t2;Arachis_valida|AravalEVm005532t5;Arachis_hypogaea_Tifguard|ArahypEVm002116t3;Arachis_hypogaea_SunOleic_97R|ArahypEVm002116t2
cluster464	4	Q8L636	GO:0071472; P:cellular response to salt stress; IMP:TAIR	Arachis_valida|AravalEVm006708t6;Arachis_valida|AravalEVm006708t2;Arachis_hypogaea_Tifguard|ArahypEVm001921t6;Arachis_hypogaea_SunOleic_97R|ArahypEVm001921t3
cluster465	4	O60008	GO:0042026; P:protein refolding; IEA:InterPro	Arachis_valida|AravalEVm007099t1;Arachis_valida|AravalEVm006816t1;Arachis_valida|AravalEVm006816t2;Arachis_valida|AravalEVm006816t3
cluster466	4	Q5ZL33	GO:0000387; P:spliceosomal snRNP assembly; ISS:UniProtKB	Arachis_valida|AravalEVm021941t1;Arachis_valida|AravalEVm021128t1;Arachis_valida|AravalEVm020590t3;Arachis_hypogaea_SunOleic_97R|ArahypEVm000278t4
cluster467	4	P93217	GO:0071555; P:cell wall organization; IEA:UniProtKB-KW	Arachis_valida|AravalEVm006057t3;Arachis_valida|AravalEVm006057t1;Arachis_valida|AravalEVm005409t1;Valsten1|AravsEVm004116t2
cluster468	4	Q99128	GO:0006886; P:intracellular protein transport; IEA:InterPro	Arachis_valida|AravalEVm014561t1;Arachis_valida|AravalEVm002152t2;Arachis_hypogaea_Tifguard|ArahypEVm001481t3;Arachis_stenosperma|ArasteEVm003799t2
cluster469	4	Q6YSJ5	GO:0031047; P:gene silencing by RNA; IEA:UniProtKB-KW	Arachis_valida|AravalEVm001785t1;Arachis_valida|AravalEVm001785t6;Arachis_stenosperma|ArasteEVm001419t2;Arachis_stenosperma|ArasteEVm001419t4
cluster470	4	Q4I7L0	GO:0006325; P:chromatin organization; IEA:UniProtKB-KW	Arachis_valida|AravalEVm013579t2;Arachis_valida|AravalEVm013697t1;Arachis_stenosperma|ArasteEVm009994t1;Arachis_stenosperma|ArasteEVm010176t3
cluster471	4	P04397	GO:0033499; P:galactose catabolic process via UDP-galactose; IDA:SGD	Arachis_valida|AravalEVm018245t1;Arachis_valida|AravalEVm017214t2;Arachis_hypogaea_SunOleic_97R|ArahypEVm008489t2;Arachis_hypogaea_SunOleic_97R|ArahypEVm012026t2
cluster472	4	N/A	N/A	Arachis_valida|AravalEVm013330t1;Arachis_valida|AravalEVm013330t3;Arachis_valida|AravalEVm013330t4;Arachis_valida|AravalEVm013330t8
cluster473	4	Q2V6J9	GO:0102425; F:myricetin 3-O-glucosyltransferase activity; IEA:UniProtKB-EC	Arachis_valida|AravalEVm009971t5;Arachis_valida|AravalEVm009971t2;Arachis_valida|AravalEVm009971t6;Arachis_stenosperma|ArasteEVm007003t1
cluster474	4	Q56VS4	GO:0006636; P:unsaturated fatty acid biosynthetic process; IDA:UniProtKB	Arachis_valida|AravalEVm028047t2;Arachis_valida|AravalEVm012644t2;Arachis_valida|AravalEVm012644t5;Arachis_valida|AravalEVm028047t1
cluster475	4	O80437	GO:0008654; P:phospholipid biosynthetic process; IEA:UniProtKB-KW	Arachis_valida|AravalEVm010356t2;Arachis_valida|AravalEVm010356t1;Arachis_stenosperma|ArasteEVm008695t1;Arachis_hypogaea_SunOleic_97R|ArahypEVm005784t1
cluster476	4	Q8NKF4	GO:0006412; P:translation; IEA:InterPro	Arachis_valida|AravalEVm016632t4;Arachis_valida|AravalEVm016632t1;Valsten1|AravsEVm011249t5;Arachis_stenosperma|ArasteEVm011581t1
cluster477	4	Q12657	GO:0000103; P:sulfate assimilation; IEA:InterPro	Arachis_valida|AravalEVm038581t1;Arachis_valida|AravalEVm039811t1;Valsten1|AravsEVm017858t3;Arachis_hypogaea_Tifguard|ArahypEVm010548t6
cluster478	4	P19262	GO:0006099; P:tricarboxylic acid cycle; IC:SGD	Arachis_valida|AravalEVm012562t1;Arachis_valida|AravalEVm012781t1;Arachis_valida|AravalEVm014622t1;Arachis_stenosperma|ArasteEVm008205t1
cluster479	4	Q92353	GO:0016579; P:protein deubiquitination; HDA:PomBase	Arachis_valida|AravalEVm007919t1;Arachis_valida|AravalEVm006899t1;Valsten1|AravsEVm007639t3;Arachis_stenosperma|ArasteEVm007157t1
cluster480	4	P0DO11	GO:0009744; P:response to sucrose; IEP:UniProtKB	Arachis_valida|AravalEVm048596t1;Arachis_valida|AravalEVm048596t2;Arachis_hypogaea_Tifguard|ArahypEVm022251t3;Arachis_hypogaea_SunOleic_97R|ArahypEVm022251t3
cluster481	4	Q9FJB8	GO:0006351; P:transcription, DNA-templated; IEA:InterPro	Arachis_valida|AravalEVm007443t2;Arachis_hypogaea_SunOleic_97R|ArahypEVm002823t4;Arachis_valida|AravalEVm007443t3;Arachis_hypogaea_Tifguard|ArahypEVm011472t4
cluster482	4	Q9ZQI7	GO:0009862; P:systemic acquired resistance, salicylic acid mediated signaling pathway; IMP:UniProtKB	Arachis_valida|AravalEVm013282t1;Valsten1|AravsEVm008992t1;Arachis_hypogaea_Tifguard|ArahypEVm007138t3;Arachis_hypogaea_SunOleic_97R|ArahypEVm007138t3
cluster483	4	Q9M8L5	N/A	Arachis_valida|AravalEVm011221t3;Arachis_hypogaea_SunOleic_97R|ArahypEVm003783t3;Arachis_hypogaea_Tifguard|ArahypEVm004245t2;Arachis_stenosperma|ArasteEVm006757t2
cluster484	4	Q8L7W2	GO:0009611; P:response to wounding; IEP:TAIR	Valsten1|AravsEVm012663t4;Arachis_valida|AravalEVm018702t4;Arachis_hypogaea_SunOleic_97R|ArahypEVm010270t2;Arachis_hypogaea_SunOleic_97R|ArahypEVm010270t3
cluster485	4	Q54YW1	GO:0030587; P:sorocarp development; IMP:dictyBase	Arachis_valida|AravalEVm029463t3;Arachis_hypogaea_Tifguard|ArahypEVm013659t2;Arachis_hypogaea_SunOleic_97R|ArahypEVm013659t4;Arachis_hypogaea_SunOleic_97R|ArahypEVm013659t1
cluster486	4	N/A	N/A	Arachis_valida|AravalEVm013653t1;Arachis_hypogaea_Tifguard|ArahypEVm006461t2;Arachis_stenosperma|ArasteEVm009523t3;Arachis_hypogaea_SunOleic_97R|ArahypEVm006461t2
cluster487	4	P41755	GO:0004352; F:glutamate dehydrogenase (NAD+) activity; IEA:UniProtKB-EC	Arachis_valida|AravalEVm010421t1;Arachis_stenosperma|ArasteEVm017048t1;Arachis_valida|AravalEVm029933t1;Valsten1|AravsEVm014411t1
cluster488	4	P49093	GO:0070981; P:L-asparagine biosynthetic process; IEA:UniProtKB-UniPathway	Arachis_valida|AravalEVm006936t1;Valsten1|AravsEVm004689t1;Arachis_hypogaea_Tifguard|ArahypEVm009782t1;Arachis_hypogaea_SunOleic_97R|ArahypEVm009782t1
cluster489	4	P32765	GO:0004866; F:endopeptidase inhibitor activity; IEA:InterPro	Arachis_valida|AravalEVm037222t1;Arachis_hypogaea_Tifguard|ArahypEVm018871t1;Arachis_hypogaea_SunOleic_97R|ArahypEVm018871t2;Arachis_hypogaea_SunOleic_97R|ArahypEVm018871t1
cluster490	4	Q07346	GO:0006536; P:glutamate metabolic process; IEA:InterPro	Arachis_valida|AravalEVm010345t1;Valsten1|AravsEVm006928t2;Arachis_hypogaea_Tifguard|ArahypEVm005318t1;Arachis_hypogaea_SunOleic_97R|ArahypEVm005318t1
cluster491	4	Q940Z5	GO:0009636; P:response to toxic substance; IEA:UniProtKB-KW	Arachis_valida|AravalEVm011467t2;Arachis_hypogaea_Tifguard|ArahypEVm006649t1;Arachis_valida|AravalEVm011017t2;Arachis_hypogaea_SunOleic_97R|ArahypEVm005819t2
cluster492	4	Q9LSP8	GO:0006355; P:regulation of transcription, DNA-templated; TAS:TAIR	Arachis_valida|AravalEVm002125t3;Arachis_hypogaea_Tifguard|ArahypEVm000767t2;Arachis_stenosperma|ArasteEVm015791t1;Arachis_hypogaea_SunOleic_97R|ArahypEVm000767t2
cluster493	4	P0C7P7	GO:0008194; F:UDP-glycosyltransferase activity; IBA:GO_Central	Arachis_valida|AravalEVm019337t2;Arachis_stenosperma|ArasteEVm016306t1;Arachis_hypogaea_Tifguard|ArahypEVm025520t1;Arachis_hypogaea_SunOleic_97R|ArahypEVm025520t1
cluster494	4	Q6C603	GO:0000463; P:maturation of LSU-rRNA from tricistronic rRNA transcript (SSU-rRNA, 58S rRNA, LSU-rRNA); IBA:GO_Central	Arachis_valida|AravalEVm031917t7;Arachis_hypogaea_SunOleic_97R|ArahypEVm016359t2;Arachis_valida|AravalEVm031917t3;Arachis_stenosperma|ArasteEVm021176t1
cluster495	4	Q9M0X5	GO:0006468; P:protein phosphorylation; IBA:GO_Central	Arachis_valida|AravalEVm004387t2;Arachis_stenosperma|ArasteEVm001377t1;Arachis_hypogaea_Tifguard|ArahypEVm000752t6;Arachis_hypogaea_SunOleic_97R|ArahypEVm000752t6
cluster496	4	Q6NPP4	GO:0009409; P:response to cold; IMP:TAIR	Arachis_valida|AravalEVm001057t9;Arachis_stenosperma|ArasteEVm000808t4;Arachis_hypogaea_SunOleic_97R|ArahypEVm000992t7;Arachis_stenosperma|ArasteEVm000808t7
cluster497	4	O81971	GO:0016709; F:oxidoreductase activity, acting on paired donors, with incorporation or reduction of molecular oxygen, NAD(P)H as one donor, and incorporation of one atom of oxygen; IBA:GO_Central	Arachis_valida|AravalEVm007938t1;Arachis_hypogaea_Tifguard|ArahypEVm005143t1;Arachis_hypogaea_SunOleic_97R|ArahypEVm004356t6;Arachis_hypogaea_SunOleic_97R|ArahypEVm005143t1
cluster498	4	Q9S7Y1	GO:0006355; P:regulation of transcription, DNA-templated; TAS:TAIR	Arachis_valida|AravalEVm030658t1;Valsten1|AravsEVm020592t1;Arachis_hypogaea_Tifguard|ArahypEVm015958t1;Arachis_hypogaea_SunOleic_97R|ArahypEVm015958t1
cluster499	4	Q9SXB4	GO:0048544; P:recognition of pollen; IEA:InterPro	Arachis_valida|AravalEVm002407t4;Arachis_hypogaea_Tifguard|ArahypEVm001009t1;Arachis_stenosperma|ArasteEVm001819t2;Arachis_hypogaea_SunOleic_97R|ArahypEVm001009t4
cluster500	4	Q8R3G9	GO:0007283; P:spermatogenesis; IDA:MGI	Arachis_valida|AravalEVm035891t1;Arachis_stenosperma|ArasteEVm022496t1;Arachis_valida|AravalEVm046044t1;Arachis_stenosperma|ArasteEVm021319t1
cluster501	4	F4IPM3	GO:0080142; P:regulation of salicylic acid biosynthetic process; IBA:GO_Central	Arachis_valida|AravalEVm007711t2;Arachis_hypogaea_Tifguard|ArahypEVm003880t2;Arachis_hypogaea_SunOleic_97R|ArahypEVm003880t3;Arachis_hypogaea_SunOleic_97R|ArahypEVm003880t2
cluster502	4	Q9C9T2	GO:0010224; P:response to UV-B; IDA:UniProtKB	Arachis_stenosperma|ArasteEVm008569t3;Arachis_hypogaea_Tifguard|ArahypEVm006495t8;Arachis_hypogaea_Tifguard|ArahypEVm006495t7;Arachis_hypogaea_SunOleic_97R|ArahypEVm006495t7
cluster503	4	Q6DR10	GO:0016413; F:O-acetyltransferase activity; IBA:GO_Central	Arachis_valida|AravalEVm019744t1;Valsten1|AravsEVm013327t1;Arachis_hypogaea_Tifguard|ArahypEVm010668t2;Arachis_hypogaea_SunOleic_97R|ArahypEVm010668t2
cluster504	4	N/A	N/A	Arachis_valida|AravalEVm059478t1;Arachis_stenosperma|ArasteEVm016820t1;Valsten1|AravsEVm020401t1;Arachis_hypogaea_SunOleic_97R|ArahypEVm029090t1
cluster505	4	Q9FF31	GO:0004674; F:protein serine/threonine kinase activity; IEA:UniProtKB-KW	Arachis_valida|AravalEVm028089t4;Arachis_hypogaea_Tifguard|ArahypEVm001408t8;Arachis_hypogaea_SunOleic_97R|ArahypEVm001408t8;Valsten1|AravsEVm014017t1
cluster506	4	O48538	GO:0009723; P:response to ethylene; IMP:TAIR	Arachis_valida|AravalEVm001675t3;Arachis_hypogaea_SunOleic_97R|ArahypEVm000741t4;Arachis_hypogaea_SunOleic_97R|ArahypEVm000741t3;Arachis_stenosperma|ArasteEVm001261t2
cluster507	4	Q99090	GO:0003700; F:DNA-binding transcription factor activity; IEA:InterPro	Arachis_valida|AravalEVm012882t2;Arachis_hypogaea_SunOleic_97R|ArahypEVm012732t1;Arachis_hypogaea_SunOleic_97R|ArahypEVm012732t2;Arachis_hypogaea_SunOleic_97R|ArahypEVm012732t4
cluster508	4	B5BSX1	GO:0016705; F:oxidoreductase activity, acting on paired donors, with incorporation or reduction of molecular oxygen; IEA:InterPro	Arachis_valida|AravalEVm010860t1;Valsten1|AravsEVm007269t5;Arachis_stenosperma|ArasteEVm007613t1;Arachis_hypogaea_SunOleic_97R|ArahypEVm005314t1
cluster509	4	Q66GP0	GO:0016567; P:protein ubiquitination; IEA:UniProtKB-UniPathway	Arachis_valida|AravalEVm006096t1;Valsten1|AravsEVm003947t4;Arachis_stenosperma|ArasteEVm005557t2;Valsten1|AravsEVm004574t2
cluster510	4	Q8RXR6	GO:0009737; P:response to abscisic acid; IMP:TAIR	Arachis_hypogaea_SunOleic_97R|ArahypEVm004404t1;Arachis_stenosperma|ArasteEVm005524t1;Arachis_stenosperma|ArasteEVm005524t3;Arachis_hypogaea_Tifguard|ArahypEVm004404t1
cluster511	4	Q9FH54	GO:0007275; P:multicellular organism development; IEA:UniProtKB-KW	Arachis_valida|AravalEVm036794t3;Arachis_hypogaea_Tifguard|ArahypEVm017646t1;Arachis_hypogaea_SunOleic_97R|ArahypEVm021974t2;Arachis_hypogaea_SunOleic_97R|ArahypEVm017646t1
cluster512	4	P38679	GO:0018105; P:peptidyl-serine phosphorylation; IBA:GO_Central	Arachis_valida|AravalEVm005268t1;Valsten1|AravsEVm011020t4;Arachis_stenosperma|ArasteEVm005528t9;Arachis_stenosperma|ArasteEVm005528t8
cluster513	4	N/A	N/A	Arachis_valida|AravalEVm058548t2;Arachis_hypogaea_SunOleic_97R|ArahypEVm026722t1;Arachis_valida|AravalEVm058548t3;Valsten1|AravsEVm042110t3
cluster514	4	N/A	N/A	Arachis_valida|AravalEVm080794t1;Valsten1|AravsEVm063989t3;Arachis_hypogaea_Tifguard|ArahypEVm037190t1;Arachis_hypogaea_SunOleic_97R|ArahypEVm037190t1
cluster515	4	P46603	GO:0043565; F:sequence-specific DNA binding; IEA:InterPro	Arachis_valida|AravalEVm026640t1;Arachis_hypogaea_Tifguard|ArahypEVm016672t1;Arachis_stenosperma|ArasteEVm027117t1;Arachis_hypogaea_SunOleic_97R|ArahypEVm016672t1
cluster516	4	Q9T072	GO:0006355; P:regulation of transcription, DNA-templated; TAS:TAIR	Arachis_valida|AravalEVm030398t1;Arachis_stenosperma|ArasteEVm011797t6;Arachis_hypogaea_SunOleic_97R|ArahypEVm009243t1;Arachis_stenosperma|ArasteEVm011797t2
cluster517	4	Q43314	GO:0009651; P:response to salt stress; IEP:TAIR	Arachis_valida|AravalEVm015375t1;Arachis_hypogaea_Tifguard|ArahypEVm008310t1;Arachis_stenosperma|ArasteEVm004118t4;Arachis_hypogaea_SunOleic_97R|ArahypEVm008310t1
cluster518	4	Q9FN75	GO:0016887; F:ATPase activity; IEA:UniProtKB-EC	Arachis_valida|AravalEVm009876t1;Arachis_hypogaea_Tifguard|ArahypEVm005520t1;Arachis_hypogaea_SunOleic_97R|ArahypEVm005169t1;Arachis_hypogaea_Tifguard|ArahypEVm005520t2
cluster519	4	P18616	GO:0006366; P:transcription by RNA polymerase II; IEA:InterPro	Arachis_valida|AravalEVm003062t2;Arachis_stenosperma|ArasteEVm000099t4;Arachis_hypogaea_SunOleic_97R|ArahypEVm000075t4;Arachis_valida|AravalEVm000107t3
cluster520	4	Q9FRS6	GO:0046777; P:protein autophosphorylation; IBA:GO_Central	Arachis_valida|AravalEVm001199t1;Valsten1|AravsEVm000808t1;Arachis_hypogaea_Tifguard|ArahypEVm002616t2;Arachis_hypogaea_SunOleic_97R|ArahypEVm002616t2
cluster521	4	Q9LDR8	GO:0009611; P:response to wounding; IEP:TAIR	Arachis_valida|AravalEVm017635t1;Arachis_hypogaea_Tifguard|ArahypEVm009613t2;Arachis_hypogaea_SunOleic_97R|ArahypEVm009613t1;Arachis_hypogaea_SunOleic_97R|ArahypEVm009613t2
cluster522	4	A7PHN8	GO:0051539; F:4 iron, 4 sulfur cluster binding; IBA:GO_Central	Arachis_valida|AravalEVm036082t1;Arachis_hypogaea_SunOleic_97R|ArahypEVm023411t1;Arachis_hypogaea_SunOleic_97R|ArahypEVm023998t2;Arachis_hypogaea_SunOleic_97R|ArahypEVm023998t1
cluster523	4	P08927	GO:0042026; P:protein refolding; IEA:InterPro	Arachis_valida|AravalEVm006390t3;Valsten1|AravsEVm004786t3;Arachis_stenosperma|ArasteEVm004592t1;Arachis_hypogaea_SunOleic_97R|ArahypEVm011047t5
cluster524	4	O04341	GO:0045454; P:cell redox homeostasis; IEA:InterPro	Arachis_valida|AravalEVm082570t1;Valsten1|AravsEVm065888t1;Arachis_hypogaea_SunOleic_97R|ArahypEVm038243t2;Arachis_hypogaea_SunOleic_97R|ArahypEVm038243t1
cluster525	4	N/A	N/A	Arachis_valida|AravalEVm018719t1;Arachis_hypogaea_Tifguard|ArahypEVm015270t1;Arachis_stenosperma|ArasteEVm031047t1;Arachis_hypogaea_SunOleic_97R|ArahypEVm015270t1
cluster526	4	Q8VYZ3	GO:0045490; P:pectin catabolic process; IBA:GO_Central	Arachis_valida|AravalEVm020276t1;Arachis_hypogaea_Tifguard|ArahypEVm011063t1;Arachis_hypogaea_SunOleic_97R|ArahypEVm009270t3;Arachis_hypogaea_SunOleic_97R|ArahypEVm011063t1
cluster527	4	Q9ZP54	GO:0006979; P:response to oxidative stress; IEP:TAIR	Arachis_valida|AravalEVm001437t3;Arachis_hypogaea_Tifguard|ArahypEVm001219t2;Arachis_hypogaea_SunOleic_97R|ArahypEVm001219t2;Valsten1|AravsEVm021498t2
cluster528	4	Q41249	GO:0015979; P:photosynthesis; IEA:UniProtKB-KW	Arachis_valida|AravalEVm016186t2;Arachis_hypogaea_Tifguard|ArahypEVm010030t2;Arachis_hypogaea_SunOleic_97R|ArahypEVm010030t1;Arachis_hypogaea_SunOleic_97R|ArahypEVm010030t2
cluster529	4	C8VG90	GO:0006099; P:tricarboxylic acid cycle; IBA:GO_Central	Arachis_valida|AravalEVm007055t1;Arachis_stenosperma|ArasteEVm004751t1;Arachis_hypogaea_SunOleic_97R|ArahypEVm001766t1;Arachis_hypogaea_SunOleic_97R|ArahypEVm001766t6
cluster530	4	P93257	GO:0008270; F:zinc ion binding; IEA:InterPro	Arachis_valida|AravalEVm032439t1;Arachis_hypogaea_Tifguard|ArahypEVm010384t3;Arachis_hypogaea_SunOleic_97R|ArahypEVm010159t3;Arachis_hypogaea_SunOleic_97R|ArahypEVm010384t3
cluster531	4	Q9FE67	GO:0019760; P:glucosinolate metabolic process; IMP:TAIR	Arachis_valida|AravalEVm037034t1;Valsten1|AravsEVm024975t1;Arachis_hypogaea_SunOleic_97R|ArahypEVm018769t1;Arachis_hypogaea_SunOleic_97R|ArahypEVm018517t1
cluster532	4	P33083	GO:0009734; P:auxin-activated signaling pathway; IEA:UniProtKB-KW	Arachis_valida|AravalEVm086525t2;Valsten1|AravsEVm069632t2;Arachis_valida|AravalEVm086525t1;Valsten1|AravsEVm069632t3
cluster533	4	Q0WNG6	GO:0008195; F:phosphatidate phosphatase activity; IBA:GO_Central	Arachis_valida|AravalEVm027223t1;Valsten1|AravsEVm018342t7;Arachis_stenosperma|ArasteEVm014775t2;Arachis_hypogaea_SunOleic_97R|ArahypEVm014501t5
cluster534	4	P63024	GO:0016192; P:vesicle-mediated transport; IDA:UniProtKB	Arachis_valida|AravalEVm056425t4;Arachis_stenosperma|ArasteEVm047734t2;Arachis_valida|AravalEVm069269t1;Arachis_hypogaea_SunOleic_97R|ArahypEVm023519t1
cluster535	4	Q40392	GO:0007165; P:signal transduction; IEA:InterPro	Arachis_hypogaea_SunOleic_97R|ArahypEVm000732t1;Valsten1|AravsEVm003661t4;Arachis_hypogaea_Tifguard|ArahypEVm000732t1;Arachis_stenosperma|ArasteEVm009682t3
cluster536	4	Q8LEJ6	GO:0009834; P:plant-type secondary cell wall biogenesis; IMP:TAIR	Arachis_valida|AravalEVm029935t1;Arachis_hypogaea_SunOleic_97R|ArahypEVm014583t1;Arachis_valida|AravalEVm032225t1;Arachis_stenosperma|ArasteEVm021493t1
cluster537	4	O48716	GO:0009846; P:pollen germination; IDA:TAIR	Arachis_valida|AravalEVm029272t1;Valsten1|AravsEVm009821t4;Arachis_stenosperma|ArasteEVm006279t1;Arachis_hypogaea_SunOleic_97R|ArahypEVm004590t1
cluster538	4	Q9C519	GO:0010200; P:response to chitin; IEP:TAIR	Arachis_valida|AravalEVm009099t2;Arachis_hypogaea_Tifguard|ArahypEVm012869t5;Arachis_stenosperma|ArasteEVm013460t2;Arachis_hypogaea_SunOleic_97R|ArahypEVm012869t5
cluster539	4	N/A	N/A	Arachis_valida|AravalEVm036628t1;Valsten1|AravsEVm025147t2;Arachis_hypogaea_Tifguard|ArahypEVm018852t1;Arachis_hypogaea_SunOleic_97R|ArahypEVm018852t1
cluster540	4	Q9FFY9	GO:0000723; P:telomere maintenance; TAS:TAIR	Arachis_valida|AravalEVm004679t7;Arachis_stenosperma|ArasteEVm003434t1;Arachis_hypogaea_SunOleic_97R|ArahypEVm002258t17;Arachis_stenosperma|ArasteEVm003434t4
cluster541	4	F4J1Q9	GO:0003333; P:amino acid transmembrane transport; IBA:GO_Central	Arachis_valida|AravalEVm000861t7;Valsten1|AravsEVm010228t7;Arachis_stenosperma|ArasteEVm009753t3;Arachis_hypogaea_SunOleic_97R|ArahypEVm007298t2
cluster542	4	P09761	GO:0050832; P:defense response to fungus; IEA:InterPro	Arachis_valida|AravalEVm056003t1;Valsten1|AravsEVm041104t1;Arachis_hypogaea_Tifguard|ArahypEVm026274t2;Arachis_hypogaea_SunOleic_97R|ArahypEVm026274t2
cluster543	4	N/A	N/A	Arachis_valida|AravalEVm016818t1;Valsten1|AravsEVm011471t1;Arachis_hypogaea_Tifguard|ArahypEVm009120t1;Arachis_hypogaea_SunOleic_97R|ArahypEVm009120t1
cluster544	4	Q9C2L8	GO:0032889; P:regulation of vacuole fusion, non-autophagic; IBA:GO_Central	Arachis_valida|AravalEVm039410t1;Valsten1|AravsEVm010540t2;Arachis_hypogaea_Tifguard|ArahypEVm011024t5;Arachis_stenosperma|ArasteEVm025780t1
cluster545	4	O42945	GO:0000390; P:spliceosomal complex disassembly; ISO:PomBase	Arachis_valida|AravalEVm003350t1;Valsten1|AravsEVm000419t1;Arachis_hypogaea_Tifguard|ArahypEVm001550t6;Arachis_stenosperma|ArasteEVm004899t1
cluster546	4	Q9M439	GO:0009099; P:valine biosynthetic process; IEA:UniProtKB-UniPathway	Arachis_valida|AravalEVm014522t2;Arachis_hypogaea_Tifguard|ArahypEVm008958t2;Arachis_stenosperma|ArasteEVm015573t4;Arachis_hypogaea_SunOleic_97R|ArahypEVm008958t2
cluster547	4	Q8LBI9	GO:0005351; F:carbohydrate:proton symporter activity; IBA:GO_Central	Arachis_valida|AravalEVm011900t2;Valsten1|AravsEVm007673t4;Arachis_hypogaea_Tifguard|ArahypEVm008281t1;Arachis_hypogaea_SunOleic_97R|ArahypEVm008281t1
cluster548	4	O14111	GO:0016540; P:protein autoprocessing; IEA:UniProtKB-UniRule	Arachis_valida|AravalEVm000990t4;Arachis_stenosperma|ArasteEVm005564t6;Arachis_stenosperma|ArasteEVm005564t3;Arachis_stenosperma|ArasteEVm005564t8
cluster549	4	Q6DKJ4	GO:0016055; P:Wnt signaling pathway; IEA:UniProtKB-KW	Arachis_valida|AravalEVm008896t1;Arachis_hypogaea_Tifguard|ArahypEVm003403t5;Arachis_hypogaea_SunOleic_97R|ArahypEVm003403t6;Arachis_hypogaea_SunOleic_97R|ArahypEVm003403t5
cluster550	4	P55229	GO:0019252; P:starch biosynthetic process; IEA:UniProtKB-UniPathway	Arachis_valida|AravalEVm009078t2;Valsten1|AravsEVm006152t2;Arachis_hypogaea_Tifguard|ArahypEVm009375t3;Arachis_stenosperma|ArasteEVm006475t3
cluster551	4	F4JT78	GO:0007165; P:signal transduction; IEA:InterPro	Arachis_valida|AravalEVm024920t3;Arachis_hypogaea_Tifguard|ArahypEVm000380t12;Arachis_hypogaea_SunOleic_97R|ArahypEVm000380t12;Arachis_stenosperma|ArasteEVm008116t6
cluster552	4	Q8RWG1	GO:0010027; P:thylakoid membrane organization; IMP:UniProtKB	Arachis_valida|AravalEVm004484t3;Valsten1|AravsEVm003059t2;Arachis_hypogaea_SunOleic_97R|ArahypEVm009698t4;Valsten1|AravsEVm003059t6
cluster553	4	Q8LD98	GO:1902074; P:response to salt; IMP:TAIR	Arachis_valida|AravalEVm030534t1;Arachis_hypogaea_Tifguard|ArahypEVm016195t1;Arachis_hypogaea_SunOleic_97R|ArahypEVm016006t1;Arachis_hypogaea_SunOleic_97R|ArahypEVm016195t1
cluster554	4	N/A	N/A	Arachis_valida|AravalEVm015583t1;Arachis_hypogaea_Tifguard|ArahypEVm009244t1;Arachis_stenosperma|ArasteEVm011005t10;Arachis_hypogaea_SunOleic_97R|ArahypEVm009687t4
cluster555	4	P33723	GO:0032482; P:Rab protein signal transduction; IBA:GO_Central	Arachis_valida|AravalEVm040292t1;Arachis_stenosperma|ArasteEVm024103t6;Arachis_hypogaea_SunOleic_97R|ArahypEVm020039t3;Arachis_hypogaea_Tifguard|ArahypEVm020039t3
cluster556	4	O88623	GO:0006511; P:ubiquitin-dependent protein catabolic process; IEA:InterPro	Arachis_valida|AravalEVm002991t3;Arachis_stenosperma|ArasteEVm002664t2;Arachis_stenosperma|ArasteEVm001373t5;Arachis_stenosperma|ArasteEVm001401t2
cluster557	4	N/A	N/A	Arachis_valida|AravalEVm022369t1;Valsten1|AravsEVm014190t2;Arachis_stenosperma|ArasteEVm010964t2;Arachis_hypogaea_SunOleic_97R|ArahypEVm010473t2
cluster558	4	Q9ZUX1	GO:0009611; P:response to wounding; IEP:TAIR	Arachis_valida|AravalEVm010284t1;Arachis_stenosperma|ArasteEVm007422t2;Arachis_hypogaea_SunOleic_97R|ArahypEVm005282t1;Arachis_hypogaea_SunOleic_97R|ArahypEVm005281t1
cluster559	4	P0DKL2	GO:0016021; C:integral component of membrane; IEA:UniProtKB-KW	Arachis_valida|AravalEVm002854t6;Arachis_hypogaea_Tifguard|ArahypEVm002037t6;Arachis_stenosperma|ArasteEVm002124t12;Arachis_hypogaea_SunOleic_97R|ArahypEVm002037t3
cluster560	4	P25377	GO:0006066; P:alcohol metabolic process; IDA:SGD	Arachis_valida|AravalEVm019030t2;Valsten1|AravsEVm012920t1;Arachis_hypogaea_Tifguard|ArahypEVm010384t1;Arachis_hypogaea_SunOleic_97R|ArahypEVm010384t1
cluster561	4	P32110	GO:0010038; P:response to metal ion; TAS:AgBase	Arachis_valida|AravalEVm042824t1;Arachis_hypogaea_Tifguard|ArahypEVm016745t5;Arachis_stenosperma|ArasteEVm023429t1;Arachis_hypogaea_SunOleic_97R|ArahypEVm016745t5
cluster562	4	Q9MB95	GO:0009835; P:fruit ripening; IEA:UniProtKB-KW	Arachis_valida|AravalEVm010423t4;Valsten1|AravsEVm006716t4;Arachis_hypogaea_Tifguard|ArahypEVm005856t1;Arachis_hypogaea_SunOleic_97R|ArahypEVm005856t1
cluster563	4	Q40392	GO:0007165; P:signal transduction; IEA:InterPro	Arachis_valida|AravalEVm012388t1;Arachis_hypogaea_Tifguard|ArahypEVm000277t10;Arachis_stenosperma|ArasteEVm013654t1;Arachis_stenosperma|ArasteEVm000924t7
cluster564	4	P40235	GO:0023052; P:signaling; NAS:PomBase	Arachis_valida|AravalEVm016287t2;Arachis_stenosperma|ArasteEVm024672t1;Arachis_hypogaea_SunOleic_97R|ArahypEVm007701t1;Arachis_hypogaea_SunOleic_97R|ArahypEVm007701t4
cluster565	4	O64470	GO:0080088; P:spermidine hydroxycinnamate conjugate biosynthetic process; IDA:TAIR	Arachis_valida|AravalEVm011453t1;Arachis_hypogaea_Tifguard|ArahypEVm006722t3;Arachis_hypogaea_SunOleic_97R|ArahypEVm006722t5;Arachis_hypogaea_SunOleic_97R|ArahypEVm006722t2
cluster566	4	Q1K615	GO:0006081; P:cellular aldehyde metabolic process; IEA:InterPro	Arachis_valida|AravalEVm009001t1;Valsten1|AravsEVm006354t1;Arachis_hypogaea_Tifguard|ArahypEVm004104t5;Arachis_stenosperma|ArasteEVm007373t1
cluster567	4	Q8LFU0	GO:0003700; F:DNA-binding transcription factor activity; ISS:TAIR	Arachis_valida|AravalEVm020131t1;Valsten1|AravsEVm013580t3;Arachis_stenosperma|ArasteEVm014554t2;Arachis_stenosperma|ArasteEVm014554t4
cluster568	4	Q07171	GO:0030041; P:actin filament polymerization; ISS:UniProtKB	Arachis_valida|AravalEVm016323t3;Arachis_stenosperma|ArasteEVm029459t1;Arachis_hypogaea_Tifguard|ArahypEVm002577t2;Arachis_hypogaea_SunOleic_97R|ArahypEVm002577t10
cluster569	4	Q00075	GO:0005992; P:trehalose biosynthetic process; IEA:InterPro	Arachis_valida|AravalEVm009827t1;Arachis_stenosperma|ArasteEVm001343t1;Arachis_hypogaea_SunOleic_97R|ArahypEVm005183t1;Arachis_hypogaea_SunOleic_97R|ArahypEVm005183t2
cluster570	4	N/A	N/A	Arachis_valida|AravalEVm013835t5;Valsten1|AravsEVm011888t5;Arachis_stenosperma|ArasteEVm012155t6;Valsten1|AravsEVm011888t4
cluster571	4	Q9C637	GO:0005886; C:plasma membrane; IEA:UniProtKB-SubCell	Arachis_valida|AravalEVm006143t1;Valsten1|AravsEVm050046t1;Arachis_hypogaea_Tifguard|ArahypEVm009601t1;Arachis_hypogaea_SunOleic_97R|ArahypEVm000868t2
cluster572	4	N/A	N/A	Arachis_valida|AravalEVm001905t6;Valsten1|AravsEVm006020t2;Arachis_stenosperma|ArasteEVm019271t1;Arachis_stenosperma|ArasteEVm019271t3
cluster573	4	Q9LFR7	GO:0052689; F:carboxylic ester hydrolase activity; IEA:UniProtKB-KW	Arachis_stenosperma|ArasteEVm014344t1;Arachis_hypogaea_Tifguard|ArahypEVm011761t1;Arachis_hypogaea_SunOleic_97R|ArahypEVm011761t1;Arachis_hypogaea_Tifguard|ArahypEVm012800t1
cluster574	4	P54319	GO:0043162; P:ubiquitin-dependent protein catabolic process via the multivesicular body sorting pathway; ISS:UniProtKB	Arachis_valida|AravalEVm003211t1;Arachis_hypogaea_Tifguard|ArahypEVm001537t2;Arachis_hypogaea_SunOleic_97R|ArahypEVm001537t2;Arachis_stenosperma|ArasteEVm002502t4
cluster575	4	A5JTQ3	GO:0045493; P:xylan catabolic process; IEA:UniProtKB-KW	Arachis_valida|AravalEVm003050t1;Arachis_hypogaea_SunOleic_97R|ArahypEVm005256t4;Arachis_valida|AravalEVm003078t1;Valsten1|AravsEVm002072t2
cluster576	4	Q9SII6	GO:0006952; P:defense response; IEA:UniProtKB-KW	Arachis_valida|AravalEVm015352t3;Arachis_hypogaea_Tifguard|ArahypEVm013992t3;Arachis_hypogaea_SunOleic_97R|ArahypEVm008383t3;Arachis_hypogaea_SunOleic_97R|ArahypEVm013992t3
cluster577	4	Q10MB4	GO:0009651; P:response to salt stress; IEA:EnsemblPlants	Arachis_valida|AravalEVm027321t1;Arachis_stenosperma|ArasteEVm011434t2;Arachis_hypogaea_Tifguard|ArahypEVm018616t1;Arachis_hypogaea_SunOleic_97R|ArahypEVm018616t1
cluster578	4	Q9SJL9	GO:0010411; P:xyloglucan metabolic process; IEA:InterPro	Arachis_valida|AravalEVm026157t1;Arachis_hypogaea_SunOleic_97R|ArahypEVm013952t3;Arachis_valida|AravalEVm025181t1;Valsten1|AravsEVm016917t1
cluster579	4	Q4WM95	GO:0098789; P:pre-mRNA cleavage required for polyadenylation; IEA:InterPro	Arachis_valida|AravalEVm020437t1;Valsten1|AravsEVm007798t2;Arachis_hypogaea_Tifguard|ArahypEVm000335t4;Arachis_stenosperma|ArasteEVm000527t2
cluster580	4	O04011	GO:0009734; P:auxin-activated signaling pathway; IEA:UniProtKB-KW	Arachis_valida|AravalEVm030491t1;Valsten1|AravsEVm026732t1;Arachis_hypogaea_Tifguard|ArahypEVm019472t1;Arachis_hypogaea_SunOleic_97R|ArahypEVm019472t1
cluster581	4	O59953	GO:0006412; P:translation; IEA:InterPro	Arachis_valida|AravalEVm025145t7;Valsten1|AravsEVm015516t2;Arachis_valida|AravalEVm025364t3;Arachis_stenosperma|ArasteEVm017324t2
cluster582	4	Q9SZ46	GO:0106146; P:sideretin biosynthesis; IDA:TAIR	Arachis_valida|AravalEVm008891t1;Arachis_hypogaea_Tifguard|ArahypEVm004719t1;Arachis_hypogaea_SunOleic_97R|ArahypEVm004480t1;Arachis_hypogaea_SunOleic_97R|ArahypEVm004719t1
cluster583	4	N/A	N/A	Arachis_valida|AravalEVm073535t1;Valsten1|AravsEVm051353t2;Arachis_hypogaea_Tifguard|ArahypEVm030463t2;Arachis_hypogaea_SunOleic_97R|ArahypEVm030463t2
cluster584	4	N/A	N/A	Arachis_valida|AravalEVm011953t4;Arachis_hypogaea_SunOleic_97R|ArahypEVm011608t15;Arachis_hypogaea_SunOleic_97R|ArahypEVm011608t7;Arachis_stenosperma|ArasteEVm019849t7
cluster585	4	O22928	GO:0031119; P:tRNA pseudouridine synthesis; IBA:GO_Central	Arachis_valida|AravalEVm008613t3;Valsten1|AravsEVm005749t6;Arachis_stenosperma|ArasteEVm006078t1;Valsten1|AravsEVm005749t4
cluster586	4	Q39111	GO:0009826; P:unidimensional cell growth; IGI:TAIR	Arachis_valida|AravalEVm017948t2;Arachis_hypogaea_SunOleic_97R|ArahypEVm009470t1;Arachis_hypogaea_SunOleic_97R|ArahypEVm009470t2;Arachis_hypogaea_SunOleic_97R|ArahypEVm009470t5
cluster587	4	Q6B6R4	GO:0009753; P:response to jasmonic acid; IEP:UniProtKB	Arachis_valida|AravalEVm018651t2;Arachis_hypogaea_Tifguard|ArahypEVm012208t3;Arachis_hypogaea_SunOleic_97R|ArahypEVm012208t1;Arachis_hypogaea_SunOleic_97R|ArahypEVm012208t3
cluster588	4	Q8GYH5	GO:0009751; P:response to salicylic acid; IEP:TAIR	Arachis_valida|AravalEVm030396t2;Valsten1|AravsEVm004688t8;Arachis_hypogaea_Tifguard|ArahypEVm009299t1;Arachis_hypogaea_SunOleic_97R|ArahypEVm009299t1
cluster589	4	N/A	N/A	Arachis_valida|AravalEVm001305t5;Arachis_stenosperma|ArasteEVm000089t1;Arachis_hypogaea_SunOleic_97R|ArahypEVm009401t1;Arachis_stenosperma|ArasteEVm000089t8
cluster590	4	O14388	GO:0002181; P:cytoplasmic translation; ISO:PomBase	Arachis_valida|AravalEVm060373t3;Valsten1|AravsEVm044876t1;Arachis_valida|AravalEVm059908t1;Arachis_stenosperma|ArasteEVm039605t1
cluster591	4	Q9VAW4	GO:0035186; P:syncytial blastoderm mitotic cell cycle; IMP:FlyBase	Arachis_valida|AravalEVm000674t2;Arachis_hypogaea_Tifguard|ArahypEVm005538t6;Arachis_stenosperma|ArasteEVm008248t1;Arachis_hypogaea_SunOleic_97R|ArahypEVm004496t3
cluster592	4	N/A	N/A	Arachis_valida|AravalEVm045038t1;Arachis_hypogaea_Tifguard|ArahypEVm019427t1;Arachis_stenosperma|ArasteEVm025372t1;Arachis_hypogaea_SunOleic_97R|ArahypEVm019427t1
cluster593	4	N/A	N/A	Arachis_valida|AravalEVm015321t1;Valsten1|AravsEVm010302t1;Arachis_stenosperma|ArasteEVm010660t1;Arachis_hypogaea_SunOleic_97R|ArahypEVm018645t1
cluster594	4	Q9SVQ1	GO:0009851; P:auxin biosynthetic process; IMP:TAIR	Arachis_valida|AravalEVm024444t1;Arachis_hypogaea_Tifguard|ArahypEVm008109t3;Arachis_stenosperma|ArasteEVm009656t1;Arachis_hypogaea_SunOleic_97R|ArahypEVm008109t3
cluster595	4	P17859	GO:0005975; P:carbohydrate metabolic process; IEA:UniProtKB-KW	Arachis_valida|AravalEVm024630t1;Valsten1|AravsEVm009650t1;Arachis_hypogaea_Tifguard|ArahypEVm010492t2;Arachis_hypogaea_SunOleic_97R|ArahypEVm010492t2
cluster596	4	N/A	N/A	Arachis_valida|AravalEVm072736t1;Valsten1|AravsEVm053647t1;Arachis_hypogaea_Tifguard|ArahypEVm032345t1;Arachis_hypogaea_SunOleic_97R|ArahypEVm032345t1
cluster597	4	Q9FJU9	GO:0006952; P:defense response; IEA:UniProtKB-KW	Arachis_valida|AravalEVm010086t1;Arachis_hypogaea_Tifguard|ArahypEVm005468t1;Arachis_hypogaea_SunOleic_97R|ArahypEVm006284t1;Arachis_hypogaea_SunOleic_97R|ArahypEVm008255t1
cluster598	4	Q9T0D3	GO:0010200; P:response to chitin; IEP:TAIR	Arachis_valida|AravalEVm021734t3;Arachis_stenosperma|ArasteEVm013173t2;Arachis_hypogaea_SunOleic_97R|ArahypEVm013036t1;Arachis_hypogaea_SunOleic_97R|ArahypEVm013036t2
cluster599	4	Q5MR23	GO:0050832; P:defense response to fungus; IDA:UniProtKB	Arachis_valida|AravalEVm060704t2;Arachis_hypogaea_Tifguard|ArahypEVm000315t8;Arachis_hypogaea_SunOleic_97R|ArahypEVm000315t10;Arachis_hypogaea_Tifguard|ArahypEVm000315t10
cluster600	4	P46256	GO:0006096; P:glycolytic process; IEA:UniProtKB-UniPathway	Arachis_valida|AravalEVm019549t1;Arachis_hypogaea_Tifguard|ArahypEVm010654t11;Arachis_stenosperma|ArasteEVm013439t2;Arachis_hypogaea_SunOleic_97R|ArahypEVm010654t11
cluster601	4	Q99089	GO:0003700; F:DNA-binding transcription factor activity; IEA:InterPro	Arachis_valida|AravalEVm031772t3;Arachis_hypogaea_SunOleic_97R|ArahypEVm008304t2;Arachis_hypogaea_SunOleic_97R|ArahypEVm008304t17;Arachis_hypogaea_SunOleic_97R|ArahypEVm008304t5
cluster602	4	Q38831	GO:0009733; P:response to auxin; TAS:TAIR	Arachis_valida|AravalEVm067929t1;Valsten1|AravsEVm040684t2;Arachis_hypogaea_Tifguard|ArahypEVm024905t2;Arachis_hypogaea_SunOleic_97R|ArahypEVm024905t5
cluster603	4	N/A	N/A	Arachis_valida|AravalEVm043620t1;Valsten1|AravsEVm024707t3;Arachis_hypogaea_SunOleic_97R|ArahypEVm020249t1;Arachis_hypogaea_Tifguard|ArahypEVm020249t2
cluster604	4	P13087	GO:0004866; F:endopeptidase inhibitor activity; IEA:InterPro	Arachis_valida|AravalEVm037822t1;Valsten1|AravsEVm025984t1;Arachis_hypogaea_Tifguard|ArahypEVm019026t1;Arachis_hypogaea_SunOleic_97R|ArahypEVm019026t1
cluster605	4	Q8W3M4	GO:0005576; C:extracellular region; IEA:UniProtKB-SubCell	Arachis_valida|AravalEVm008398t1;Valsten1|AravsEVm026584t4;Arachis_hypogaea_SunOleic_97R|ArahypEVm007856t1;Arachis_hypogaea_SunOleic_97R|ArahypEVm010521t1
cluster606	4	Q9LXA5	GO:0010726; P:positive regulation of hydrogen peroxide metabolic process; IMP:UniProtKB	Arachis_valida|AravalEVm004573t2;Arachis_hypogaea_Tifguard|ArahypEVm002164t5;Arachis_hypogaea_SunOleic_97R|ArahypEVm002164t5;Valsten1|AravsEVm066446t1
cluster607	4	Q9M817	GO:0015706; P:nitrate transport; IDA:TAIR	Arachis_valida|AravalEVm006165t2;Arachis_hypogaea_SunOleic_97R|ArahypEVm002889t2;Arachis_hypogaea_SunOleic_97R|ArahypEVm003030t4;Arachis_hypogaea_SunOleic_97R|ArahypEVm002889t7
cluster608	4	N/A	N/A	Arachis_valida|AravalEVm022253t2;Arachis_hypogaea_Tifguard|ArahypEVm011809t2;Arachis_hypogaea_SunOleic_97R|ArahypEVm011809t10;Arachis_hypogaea_Tifguard|ArahypEVm011809t7
cluster609	4	Q9FI00	GO:0009607; P:response to biotic stimulus; IEA:UniProtKB-KW	Arachis_valida|AravalEVm046054t1;Arachis_stenosperma|ArasteEVm005558t1;Arachis_hypogaea_Tifguard|ArahypEVm021343t1;Arachis_hypogaea_SunOleic_97R|ArahypEVm021343t1
cluster610	4	Q8I7P9	GO:0006313; P:transposition, DNA-mediated; NAS:UniProtKB	Arachis_valida|AravalEVm033726t1;Arachis_hypogaea_Tifguard|ArahypEVm019506t1;Arachis_hypogaea_SunOleic_97R|ArahypEVm019506t1;Arachis_stenosperma|ArasteEVm022620t2
cluster611	4	Q56Y11	GO:0009409; P:response to cold; IBA:GO_Central	Arachis_valida|AravalEVm022976t4;Valsten1|AravsEVm014949t5;Arachis_stenosperma|ArasteEVm015168t2;Valsten1|AravsEVm014949t4
cluster612	4	N/A	N/A	Arachis_valida|AravalEVm068662t1;Arachis_hypogaea_Tifguard|ArahypEVm033267t2;Arachis_hypogaea_SunOleic_97R|ArahypEVm033267t1;Arachis_hypogaea_SunOleic_97R|ArahypEVm033267t2
cluster613	4	N/A	N/A	Arachis_valida|AravalEVm036581t1;Arachis_stenosperma|ArasteEVm017897t4;Arachis_hypogaea_SunOleic_97R|ArahypEVm014813t5;Arachis_hypogaea_SunOleic_97R|ArahypEVm014199t1
cluster614	4	Q9SQT8	GO:0019632; P:shikimate metabolic process; IDA:TAIR	Arachis_valida|AravalEVm014795t1;Arachis_hypogaea_Tifguard|ArahypEVm004905t8;Arachis_stenosperma|ArasteEVm006284t5;Arachis_stenosperma|ArasteEVm006284t6
cluster615	4	Q69ZS7	GO:0006412; P:translation; IBA:GO_Central	Arachis_valida|AravalEVm003642t6;Arachis_hypogaea_Tifguard|ArahypEVm001548t11;Arachis_stenosperma|ArasteEVm002520t1;Arachis_hypogaea_SunOleic_97R|ArahypEVm001548t11
cluster616	4	N/A	N/A	Arachis_valida|AravalEVm037993t1;Valsten1|AravsEVm026407t1;Arachis_hypogaea_SunOleic_97R|ArahypEVm019156t1;Arachis_hypogaea_SunOleic_97R|ArahypEVm019156t2
cluster617	4	Q9VYA7	GO:0005634; C:nucleus; ISS:UniProtKB	Arachis_valida|AravalEVm002630t2;Valsten1|AravsEVm025573t2;Arachis_hypogaea_Tifguard|ArahypEVm001025t1;Arachis_stenosperma|ArasteEVm031115t1
cluster618	4	Q9SUQ3	GO:0004672; F:protein kinase activity; IEA:InterPro	Arachis_valida|AravalEVm006106t2;Valsten1|AravsEVm002972t1;Arachis_hypogaea_SunOleic_97R|ArahypEVm003076t1;Arachis_stenosperma|ArasteEVm002085t1
cluster619	4	N/A	N/A	Arachis_valida|AravalEVm037423t1;Valsten1|AravsEVm025725t2;Arachis_hypogaea_Tifguard|ArahypEVm018947t1;Arachis_hypogaea_SunOleic_97R|ArahypEVm018947t1
cluster620	4	Q02104	GO:0016042; P:lipid catabolic process; IEA:UniProtKB-KW	Arachis_valida|AravalEVm023117t1;Valsten1|AravsEVm015540t2;Arachis_stenosperma|ArasteEVm014835t4;Arachis_hypogaea_SunOleic_97R|ArahypEVm013049t1
cluster621	4	P31244	GO:0006511; P:ubiquitin-dependent protein catabolic process; IMP:SGD	Arachis_valida|AravalEVm001951t5;Arachis_hypogaea_Tifguard|ArahypEVm001029t4;Arachis_stenosperma|ArasteEVm000165t1;Arachis_hypogaea_SunOleic_97R|ArahypEVm001029t4
cluster622	4	P46688	GO:0009740; P:gibberellic acid mediated signaling pathway; IEA:UniProtKB-KW	Arachis_valida|AravalEVm082593t1;Valsten1|AravsEVm064989t1;Arachis_hypogaea_SunOleic_97R|ArahypEVm038205t2;Arachis_hypogaea_SunOleic_97R|ArahypEVm038205t1
cluster623	4	P17859	GO:0005975; P:carbohydrate metabolic process; IEA:UniProtKB-KW	Arachis_valida|AravalEVm024630t2;Valsten1|AravsEVm009650t2;Arachis_hypogaea_Tifguard|ArahypEVm010492t1;Arachis_hypogaea_SunOleic_97R|ArahypEVm010492t1
cluster624	4	Q940Q8	GO:0045492; P:xylan biosynthetic process; IDA:TAIR	Arachis_valida|AravalEVm015036t3;Arachis_stenosperma|ArasteEVm002183t4;Arachis_stenosperma|ArasteEVm002183t3;Arachis_stenosperma|ArasteEVm002183t5
cluster625	4	Q9STX2	GO:0010051; P:xylem and phloem pattern formation; IMP:TAIR	Arachis_valida|AravalEVm016737t1;Valsten1|AravsEVm011312t1;Arachis_hypogaea_SunOleic_97R|ArahypEVm009064t1;Valsten1|AravsEVm011312t5
cluster626	4	Q8RWW0	GO:0010068; P:protoderm histogenesis; IMP:TAIR	Arachis_valida|AravalEVm009215t1;Valsten1|AravsEVm002372t3;Arachis_valida|AravalEVm019017t1;Arachis_stenosperma|ArasteEVm000351t5
cluster627	4	Q9Y7J8	GO:0006282; P:regulation of DNA repair; ISO:PomBase	Arachis_valida|AravalEVm002374t3;Arachis_hypogaea_Tifguard|ArahypEVm000982t15;Arachis_stenosperma|ArasteEVm001584t4;Arachis_stenosperma|ArasteEVm004831t7
cluster628	4	O64864	GO:0006869; P:lipid transport; IEA:InterPro	Arachis_valida|AravalEVm043668t2;Arachis_hypogaea_Tifguard|ArahypEVm021356t1;Arachis_stenosperma|ArasteEVm029285t3;Arachis_hypogaea_SunOleic_97R|ArahypEVm020012t1
cluster629	4	N/A	N/A	Arachis_valida|AravalEVm025980t1;Valsten1|AravsEVm017451t1;Arachis_stenosperma|ArasteEVm019320t1;Arachis_hypogaea_SunOleic_97R|ArahypEVm013827t2
cluster630	4	N/A	N/A	Arachis_valida|AravalEVm035544t1;Arachis_hypogaea_Tifguard|ArahypEVm018164t1;Arachis_stenosperma|ArasteEVm023661t1;Arachis_hypogaea_SunOleic_97R|ArahypEVm018164t1
cluster631	4	N/A	N/A	Arachis_valida|AravalEVm055582t1;Valsten1|AravsEVm040757t1;Arachis_stenosperma|ArasteEVm028919t1;Arachis_hypogaea_SunOleic_97R|ArahypEVm020742t1
cluster632	4	Q6R3L0	GO:0048316; P:seed development; IGI:TAIR	Arachis_valida|AravalEVm004625t3;Arachis_hypogaea_SunOleic_97R|ArahypEVm002284t6;Arachis_hypogaea_SunOleic_97R|ArahypEVm002284t1;Arachis_hypogaea_SunOleic_97R|ArahypEVm002284t5
cluster633	4	Q9FFZ1	GO:0015996; P:chlorophyll catabolic process; IMP:TAIR	Arachis_valida|AravalEVm016727t5;Arachis_stenosperma|ArasteEVm011590t3;Arachis_hypogaea_SunOleic_97R|ArahypEVm002799t6;Arachis_stenosperma|ArasteEVm014651t4
cluster634	4	P0DH62	GO:0004672; F:protein kinase activity; IEA:InterPro	Arachis_valida|AravalEVm006639t1;Valsten1|AravsEVm005127t2;Arachis_hypogaea_Tifguard|ArahypEVm001788t7;Arachis_hypogaea_SunOleic_97R|ArahypEVm001788t5
cluster635	4	Q8IWQ3	GO:2000807; P:regulation of synaptic vesicle clustering; TAS:ARUK-UCL	Arachis_valida|AravalEVm004082t1;Arachis_stenosperma|ArasteEVm006787t3;Arachis_hypogaea_SunOleic_97R|ArahypEVm009230t3;Arachis_hypogaea_SunOleic_97R|ArahypEVm006680t4
cluster636	4	Q43847	GO:0019252; P:starch biosynthetic process; IEA:UniProtKB-UniPathway	Arachis_valida|AravalEVm006937t5;Arachis_stenosperma|ArasteEVm002868t2;Arachis_hypogaea_SunOleic_97R|ArahypEVm004133t4;Arachis_hypogaea_SunOleic_97R|ArahypEVm004133t10
cluster637	4	N/A	N/A	Arachis_valida|AravalEVm051345t2;Arachis_stenosperma|ArasteEVm025544t2;Arachis_valida|AravalEVm051345t1;Arachis_stenosperma|ArasteEVm025456t4
cluster638	4	Q9LFW3	GO:0009834; P:plant-type secondary cell wall biogenesis; IMP:TAIR	Arachis_valida|AravalEVm014085t4;Valsten1|AravsEVm009536t3;Arachis_hypogaea_Tifguard|ArahypEVm006893t3;Arachis_hypogaea_SunOleic_97R|ArahypEVm006893t3
cluster639	4	O23917	GO:0009813; P:flavonoid biosynthetic process; IEA:UniProtKB-KW	Arachis_valida|AravalEVm012363t1;Arachis_hypogaea_Tifguard|ArahypEVm006617t2;Arachis_stenosperma|ArasteEVm008704t1;Arachis_hypogaea_SunOleic_97R|ArahypEVm006617t1
cluster640	4	O23179	GO:0016042; P:lipid catabolic process; IEA:UniProtKB-KW	Arachis_valida|AravalEVm015480t1;Arachis_hypogaea_Tifguard|ArahypEVm008482t5;Arachis_stenosperma|ArasteEVm010492t2;Arachis_hypogaea_SunOleic_97R|ArahypEVm008482t5
cluster641	4	Q6XBF8	GO:0010337; P:regulation of salicylic acid metabolic process; IMP:TAIR	Arachis_valida|AravalEVm013509t1;Valsten1|AravsEVm011414t2;Arachis_hypogaea_Tifguard|ArahypEVm013003t1;Arachis_stenosperma|ArasteEVm009915t2
cluster642	4	O74341	GO:0006457; P:protein folding; ISO:PomBase	Arachis_valida|AravalEVm008636t1;Arachis_hypogaea_Tifguard|ArahypEVm004024t2;Arachis_stenosperma|ArasteEVm005803t1;Arachis_stenosperma|ArasteEVm005597t2
cluster643	4	Q8L831	GO:0046872; F:metal ion binding; IEA:UniProtKB-KW	Arachis_valida|AravalEVm003788t1;Arachis_hypogaea_Tifguard|ArahypEVm001606t1;Arachis_stenosperma|ArasteEVm002330t3;Arachis_hypogaea_SunOleic_97R|ArahypEVm001606t1
cluster644	4	P27476	GO:0006364; P:rRNA processing; IBA:GO_Central	Arachis_valida|AravalEVm009804t1;Arachis_stenosperma|ArasteEVm001245t4;Arachis_stenosperma|ArasteEVm001245t2;Arachis_hypogaea_SunOleic_97R|ArahypEVm025128t4
cluster645	4	O81416	GO:0030245; P:cellulose catabolic process; IEA:UniProtKB-KW	Arachis_valida|AravalEVm009505t1;Arachis_stenosperma|ArasteEVm007644t2;Arachis_hypogaea_SunOleic_97R|ArahypEVm013633t3;Arachis_hypogaea_SunOleic_97R|ArahypEVm013633t1
cluster646	4	Q9SGA8	GO:0008194; F:UDP-glycosyltransferase activity; IBA:GO_Central	Arachis_valida|AravalEVm012678t1;Arachis_hypogaea_Tifguard|ArahypEVm006541t7;Arachis_hypogaea_SunOleic_97R|ArahypEVm006798t2;Arachis_hypogaea_SunOleic_97R|ArahypEVm006541t7
cluster647	4	Q9C7Z9	GO:0019748; P:secondary metabolic process; IBA:GO_Central	Arachis_valida|AravalEVm012029t11;Arachis_hypogaea_Tifguard|ArahypEVm017437t1;Arachis_hypogaea_SunOleic_97R|ArahypEVm017412t1;Arachis_hypogaea_SunOleic_97R|ArahypEVm017437t1
cluster648	4	N/A	N/A	Arachis_valida|AravalEVm033788t1;Valsten1|AravsEVm022963t1;Arachis_stenosperma|ArasteEVm022252t1;Arachis_hypogaea_SunOleic_97R|ArahypEVm017338t2
cluster649	4	B0ZB57	GO:0046983; F:protein dimerization activity; IEA:InterPro	Arachis_valida|AravalEVm019057t1;Valsten1|AravsEVm012870t4;Arachis_hypogaea_Tifguard|ArahypEVm010371t1;Arachis_hypogaea_SunOleic_97R|ArahypEVm010371t1
cluster650	4	O81832	GO:0048544; P:recognition of pollen; IEA:InterPro	Arachis_valida|AravalEVm002767t3;Arachis_hypogaea_Tifguard|ArahypEVm001843t1;Arachis_stenosperma|ArasteEVm003344t3;Arachis_hypogaea_SunOleic_97R|ArahypEVm001843t1
cluster651	4	Q5REM8	GO:0016021; C:integral component of membrane; IEA:UniProtKB-KW	Arachis_valida|AravalEVm013277t1;Valsten1|AravsEVm008984t1;Arachis_stenosperma|ArasteEVm009349t1;Valsten1|AravsEVm008984t2
cluster652	4	Q3EBC2	GO:0006612; P:protein targeting to membrane; IBA:GO_Central	Arachis_valida|AravalEVm016662t3;Arachis_stenosperma|ArasteEVm010015t2;Arachis_hypogaea_SunOleic_97R|ArahypEVm009036t3;Arachis_hypogaea_Tifguard|ArahypEVm007622t4
cluster653	4	Q681N2	GO:0004842; F:ubiquitin-protein transferase activity; IEA:InterPro	Arachis_valida|AravalEVm005627t1;Valsten1|AravsEVm001800t2;Arachis_hypogaea_Tifguard|ArahypEVm001286t1;Arachis_stenosperma|ArasteEVm003749t2
cluster654	4	P93604	GO:0004674; F:protein serine/threonine kinase activity; IEA:UniProtKB-KW	Arachis_valida|AravalEVm003897t1;Arachis_hypogaea_SunOleic_97R|ArahypEVm002356t3;Arachis_hypogaea_Tifguard|ArahypEVm002356t3;Arachis_hypogaea_Tifguard|ArahypEVm002356t4
cluster655	4	F4HQ22	GO:0004674; F:protein serine/threonine kinase activity; IEA:UniProtKB-KW	Arachis_stenosperma|ArasteEVm004111t2;Arachis_hypogaea_Tifguard|ArahypEVm002808t1;Arachis_hypogaea_SunOleic_97R|ArahypEVm002808t1;Arachis_hypogaea_SunOleic_97R|ArahypEVm002808t2
cluster656	4	Q9SUQ7	GO:0006885; P:regulation of pH; IMP:TAIR	Arachis_valida|AravalEVm003020t1;Arachis_hypogaea_Tifguard|ArahypEVm001344t1;Arachis_hypogaea_SunOleic_97R|ArahypEVm003425t1;Arachis_hypogaea_SunOleic_97R|ArahypEVm001344t1
cluster657	4	Q1G3I2	GO:0009909; P:regulation of flower development; IMP:UniProtKB	Arachis_valida|AravalEVm063775t1;Arachis_stenosperma|ArasteEVm054248t1;Arachis_hypogaea_SunOleic_97R|ArahypEVm028782t2;Arachis_hypogaea_SunOleic_97R|ArahypEVm028782t1
cluster658	4	Q8W1W9	GO:0009698; P:phenylpropanoid metabolic process; IEA:UniProtKB-KW	Arachis_valida|AravalEVm011675t1;Arachis_hypogaea_Tifguard|ArahypEVm006216t1;Arachis_stenosperma|ArasteEVm007457t1;Arachis_hypogaea_SunOleic_97R|ArahypEVm006216t1
cluster659	4	Q9I4V0	GO:0055114; P:oxidation-reduction process; IDA:PseudoCAP	Arachis_valida|AravalEVm021898t1;Arachis_hypogaea_Tifguard|ArahypEVm011971t2;Arachis_hypogaea_SunOleic_97R|ArahypEVm011974t2;Arachis_hypogaea_SunOleic_97R|ArahypEVm011971t2
cluster660	4	B8AVF0	GO:0005975; P:carbohydrate metabolic process; IEA:InterPro	Arachis_valida|AravalEVm009535t2;Arachis_hypogaea_Tifguard|ArahypEVm005658t2;Arachis_hypogaea_SunOleic_97R|ArahypEVm005658t1;Arachis_hypogaea_SunOleic_97R|ArahypEVm005658t2
cluster661	4	P27141	GO:0015976; P:carbon utilization; IEA:InterPro	Arachis_valida|AravalEVm027845t4;Valsten1|AravsEVm016237t5;Arachis_stenosperma|ArasteEVm016147t2;Arachis_hypogaea_SunOleic_97R|ArahypEVm011082t12
cluster662	4	G7IBJ4	GO:0009877; P:nodulation; IMP:UniProtKB	Arachis_valida|AravalEVm003835t4;Arachis_hypogaea_Tifguard|ArahypEVm001803t1;Arachis_hypogaea_SunOleic_97R|ArahypEVm001803t1;Valsten1|AravsEVm002938t1
cluster663	4	N/A	N/A	Arachis_valida|AravalEVm003533t2;Arachis_hypogaea_Tifguard|ArahypEVm002511t4;Arachis_hypogaea_SunOleic_97R|ArahypEVm002511t6;Arachis_hypogaea_Tifguard|ArahypEVm002511t6
cluster664	4	A8MRX0	GO:0019761; P:glucosinolate biosynthetic process; IMP:TAIR	Arachis_valida|AravalEVm014380t2;Arachis_hypogaea_SunOleic_97R|ArahypEVm007743t3;Arachis_hypogaea_SunOleic_97R|ArahypEVm007743t1;Arachis_hypogaea_SunOleic_97R|ArahypEVm007743t5
cluster665	4	Q9LRR4	GO:0006952; P:defense response; IEA:UniProtKB-KW	Arachis_valida|AravalEVm033226t5;Arachis_stenosperma|ArasteEVm009224t4;Arachis_stenosperma|ArasteEVm009224t1;Valsten1|AravsEVm020145t7
cluster666	4	C0LGN2	GO:0045088; P:regulation of innate immune response; IMP:TAIR	Arachis_valida|AravalEVm001307t2;Arachis_hypogaea_Tifguard|ArahypEVm000419t10;Arachis_stenosperma|ArasteEVm000990t7;Arachis_hypogaea_SunOleic_97R|ArahypEVm000419t3
cluster667	4	Q03664	GO:0009734; P:auxin-activated signaling pathway; IEA:UniProtKB-KW	Arachis_valida|AravalEVm033466t4;Arachis_hypogaea_Tifguard|ArahypEVm017712t1;Arachis_hypogaea_SunOleic_97R|ArahypEVm018376t1;Arachis_hypogaea_Tifguard|ArahypEVm018376t1
cluster668	4	N/A	N/A	Arachis_valida|AravalEVm077387t1;Valsten1|AravsEVm060729t1;Arachis_hypogaea_Tifguard|ArahypEVm036708t1;Arachis_hypogaea_SunOleic_97R|ArahypEVm036708t1
cluster669	4	Q681X4	GO:0006355; P:regulation of transcription, DNA-templated; TAS:TAIR	Valsten1|AravsEVm014064t2;Arachis_hypogaea_Tifguard|ArahypEVm010710t1;Arachis_hypogaea_SunOleic_97R|ArahypEVm020341t1;Arachis_hypogaea_Tifguard|ArahypEVm020341t1
cluster670	4	Q9C9G7	GO:0010015; P:root morphogenesis; IMP:UniProtKB	Arachis_valida|AravalEVm026411t1;Valsten1|AravsEVm017767t1;Arachis_hypogaea_Tifguard|ArahypEVm014056t1;Arachis_hypogaea_SunOleic_97R|ArahypEVm014056t1
cluster671	4	Q9FJJ5	GO:0009652; P:thigmotropism; IMP:TAIR	Arachis_valida|AravalEVm026879t1;Arachis_hypogaea_Tifguard|ArahypEVm017710t6;Arachis_hypogaea_Tifguard|ArahypEVm017710t5;Arachis_valida|AravalEVm026879t4
cluster672	4	F4JEQ2	GO:0006468; P:protein phosphorylation; IBA:GO_Central	Arachis_valida|AravalEVm017484t1;Arachis_stenosperma|ArasteEVm012079t1;Arachis_hypogaea_SunOleic_97R|ArahypEVm010305t2;Arachis_hypogaea_SunOleic_97R|ArahypEVm010305t1
cluster673	4	Q9SXS3	GO:0009717; P:isoflavonoid biosynthetic process; IDA:UniProtKB	Arachis_valida|AravalEVm009144t1;Arachis_hypogaea_Tifguard|ArahypEVm004768t1;Arachis_hypogaea_SunOleic_97R|ArahypEVm004766t1;Arachis_hypogaea_SunOleic_97R|ArahypEVm004768t1
cluster674	4	Q40392	GO:0007165; P:signal transduction; IEA:InterPro	Arachis_valida|AravalEVm000818t4;Valsten1|AravsEVm001957t1;Arachis_hypogaea_Tifguard|ArahypEVm000293t6;Arachis_stenosperma|ArasteEVm001355t2
cluster675	4	O81974	GO:0016709; F:oxidoreductase activity, acting on paired donors, with incorporation or reduction of molecular oxygen, NAD(P)H as one donor, and incorporation of one atom of oxygen; IBA:GO_Central	Arachis_valida|AravalEVm010337t1;Arachis_hypogaea_Tifguard|ArahypEVm005439t2;Arachis_hypogaea_SunOleic_97R|ArahypEVm005439t1;Arachis_hypogaea_Tifguard|ArahypEVm005439t1
cluster676	4	Q01302	GO:0031505; P:fungal-type cell wall organization; IBA:GO_Central	Arachis_valida|AravalEVm016521t3;Valsten1|AravsEVm011030t2;Arachis_stenosperma|ArasteEVm021578t4;Valsten1|AravsEVm038093t1
cluster677	4	Q0WVF8	GO:0097428; P:protein maturation by iron-sulfur cluster transfer; IEA:InterPro	Arachis_valida|AravalEVm000867t2;Arachis_stenosperma|ArasteEVm006342t1;Arachis_hypogaea_SunOleic_97R|ArahypEVm000301t7;Arachis_hypogaea_SunOleic_97R|ArahypEVm000301t6
cluster678	4	Q9SXA1	GO:0006468; P:protein phosphorylation; IDA:TAIR	Valsten1|AravsEVm069158t3;Valsten1|AravsEVm069158t2;Arachis_hypogaea_Tifguard|ArahypEVm001128t6;Arachis_valida|AravalEVm001463t1
cluster679	4	Q8GYL7	GO:0009507; C:chloroplast; IEA:UniProtKB-SubCell	Valsten1|AravsEVm001818t6;Valsten1|AravsEVm001818t1;Arachis_stenosperma|ArasteEVm013058t4;Arachis_hypogaea_SunOleic_97R|ArahypEVm002519t4
cluster680	4	Q5UNY4	N/A	Arachis_hypogaea_Tifguard|ArahypEVm002173t1;Arachis_hypogaea_Tifguard|ArahypEVm002173t3;Arachis_hypogaea_Tifguard|ArahypEVm002173t4;Arachis_hypogaea_Tifguard|ArahypEVm002232t1
cluster681	4	P93194	GO:0006468; P:protein phosphorylation; NAS:UniProtKB	Arachis_hypogaea_Tifguard|ArahypEVm000254t5;Arachis_hypogaea_Tifguard|ArahypEVm000254t6;Arachis_stenosperma|ArasteEVm000559t3;Arachis_hypogaea_SunOleic_97R|ArahypEVm000254t2
cluster682	4	Q40392	GO:0007165; P:signal transduction; IEA:InterPro	Arachis_hypogaea_Tifguard|ArahypEVm000624t2;Arachis_hypogaea_Tifguard|ArahypEVm000624t3;Arachis_hypogaea_Tifguard|ArahypEVm000624t6;Arachis_hypogaea_SunOleic_97R|ArahypEVm000624t1
cluster683	4	N/A	N/A	Arachis_hypogaea_Tifguard|ArahypEVm027638t2;Arachis_hypogaea_Tifguard|ArahypEVm027638t1;Arachis_hypogaea_SunOleic_97R|ArahypEVm027638t2;Arachis_hypogaea_SunOleic_97R|ArahypEVm027638t1
cluster684	4	C0LGI2	GO:0004674; F:protein serine/threonine kinase activity; IEA:UniProtKB-KW	Arachis_hypogaea_Tifguard|ArahypEVm000612t2;Arachis_hypogaea_Tifguard|ArahypEVm001315t2;Arachis_hypogaea_SunOleic_97R|ArahypEVm000612t2;Arachis_stenosperma|ArasteEVm001307t5
cluster685	4	Q9SKK8	GO:0016567; P:protein ubiquitination; IEA:UniProtKB-UniPathway	Arachis_hypogaea_Tifguard|ArahypEVm008692t3;Arachis_hypogaea_Tifguard|ArahypEVm008692t2;Arachis_hypogaea_SunOleic_97R|ArahypEVm008692t1;Arachis_valida|AravalEVm047659t1
cluster686	4	N/A	N/A	Arachis_hypogaea_Tifguard|ArahypEVm003634t9;Arachis_hypogaea_Tifguard|ArahypEVm003634t4;Arachis_hypogaea_Tifguard|ArahypEVm003634t8;Arachis_hypogaea_SunOleic_97R|ArahypEVm003634t4
cluster687	4	O23791	GO:0008234; F:cysteine-type peptidase activity; IEA:UniProtKB-KW	Arachis_hypogaea_Tifguard|ArahypEVm011381t2;Arachis_hypogaea_Tifguard|ArahypEVm011381t1;Arachis_hypogaea_Tifguard|ArahypEVm011381t3;Arachis_hypogaea_Tifguard|ArahypEVm011531t1
cluster688	4	Q9C9Y8	GO:0004672; F:protein kinase activity; IEA:InterPro	Arachis_hypogaea_Tifguard|ArahypEVm005470t1;Arachis_hypogaea_Tifguard|ArahypEVm005470t3;Arachis_stenosperma|ArasteEVm007369t2;Arachis_hypogaea_SunOleic_97R|ArahypEVm003901t1
cluster689	4	F4HQ20	GO:0004674; F:protein serine/threonine kinase activity; IEA:UniProtKB-KW	Arachis_hypogaea_Tifguard|ArahypEVm002144t10;Arachis_hypogaea_Tifguard|ArahypEVm002144t11;Arachis_hypogaea_SunOleic_97R|ArahypEVm002144t11;Arachis_hypogaea_SunOleic_97R|ArahypEVm002144t10
cluster690	4	Q9LSS4	GO:0009506; C:plasmodesma; IBA:GO_Central	Arachis_hypogaea_Tifguard|ArahypEVm014427t4;Arachis_hypogaea_Tifguard|ArahypEVm014427t3;Arachis_hypogaea_SunOleic_97R|ArahypEVm015298t1;Arachis_stenosperma|ArasteEVm019338t2
cluster691	4	O80763	GO:0046686; P:response to cadmium ion; IEP:TAIR	Arachis_hypogaea_Tifguard|ArahypEVm003403t2;Arachis_hypogaea_Tifguard|ArahypEVm003403t1;Arachis_hypogaea_SunOleic_97R|ArahypEVm003403t2;Arachis_hypogaea_SunOleic_97R|ArahypEVm003403t1
cluster692	4	F4IC29	GO:0030001; P:metal ion transport; IEA:InterPro	Arachis_hypogaea_Tifguard|ArahypEVm027104t4;Arachis_hypogaea_Tifguard|ArahypEVm027104t1;Arachis_hypogaea_SunOleic_97R|ArahypEVm027104t4;Arachis_hypogaea_SunOleic_97R|ArahypEVm027104t1
cluster693	4	Q9SKD7	GO:0005216; F:ion channel activity; IEA:InterPro	Arachis_hypogaea_Tifguard|ArahypEVm000444t24;Arachis_hypogaea_Tifguard|ArahypEVm000444t16;Arachis_hypogaea_SunOleic_97R|ArahypEVm000444t16;Arachis_stenosperma|ArasteEVm002016t3
cluster694	4	Q7XA42	GO:0006952; P:defense response; IEA:UniProtKB-KW	Arachis_stenosperma|ArasteEVm015932t2;Arachis_stenosperma|ArasteEVm000812t10;Arachis_stenosperma|ArasteEVm015932t1;Arachis_stenosperma|ArasteEVm031153t1
cluster695	4	N/A	N/A	Arachis_stenosperma|ArasteEVm009035t4;Arachis_stenosperma|ArasteEVm009035t6;Arachis_stenosperma|ArasteEVm009035t8;Valsten1|AravsEVm017375t7
cluster696	4	Q67XQ0	GO:0016021; C:integral component of membrane; IEA:UniProtKB-KW	Arachis_stenosperma|ArasteEVm005635t7;Arachis_stenosperma|ArasteEVm005635t4;Valsten1|AravsEVm005487t3;Arachis_hypogaea_SunOleic_97R|ArahypEVm019860t2
cluster697	4	O81832	GO:0048544; P:recognition of pollen; IEA:InterPro	Arachis_stenosperma|ArasteEVm003306t4;Arachis_stenosperma|ArasteEVm003306t2;Arachis_hypogaea_Tifguard|ArahypEVm000955t10;Arachis_hypogaea_SunOleic_97R|ArahypEVm000955t11
cluster698	4	Q94F87	GO:0010216; P:maintenance of DNA methylation; IBA:GO_Central	Arachis_stenosperma|ArasteEVm000693t8;Arachis_stenosperma|ArasteEVm000693t1;Arachis_stenosperma|ArasteEVm000693t2;Valsten1|AravsEVm001770t3
cluster699	4	O65272	GO:0015386; F:potassium:proton antiporter activity; IMP:CACAO	Arachis_stenosperma|ArasteEVm000525t3;Arachis_stenosperma|ArasteEVm000443t2;Arachis_stenosperma|ArasteEVm000443t4;Arachis_hypogaea_SunOleic_97R|ArahypEVm009817t2
cluster700	4	Q9C5H9	GO:0090063; P:positive regulation of microtubule nucleation; IDA:UniProtKB	Arachis_stenosperma|ArasteEVm003654t1;Arachis_stenosperma|ArasteEVm000476t2;Arachis_stenosperma|ArasteEVm003654t2;Arachis_stenosperma|ArasteEVm003654t4
cluster701	4	Q9CAL2	GO:0046777; P:protein autophosphorylation; IBA:GO_Central	Arachis_stenosperma|ArasteEVm003857t4;Arachis_stenosperma|ArasteEVm003857t5;Arachis_hypogaea_Tifguard|ArahypEVm008030t4;Arachis_hypogaea_SunOleic_97R|ArahypEVm002267t3
cluster702	4	N/A	N/A	Arachis_stenosperma|ArasteEVm000057t4;Arachis_stenosperma|ArasteEVm000057t10;Arachis_stenosperma|ArasteEVm000057t9;Arachis_hypogaea_SunOleic_97R|ArahypEVm002708t12
cluster703	4	O15943	GO:0031290; P:retinal ganglion cell axon guidance; IMP:FlyBase	Arachis_stenosperma|ArasteEVm000098t3;Arachis_stenosperma|ArasteEVm000098t1;Arachis_stenosperma|ArasteEVm000575t1;Arachis_stenosperma|ArasteEVm001301t1
cluster704	4	Q9M022	GO:0006511; P:ubiquitin-dependent protein catabolic process; IMP:TAIR	Arachis_stenosperma|ArasteEVm021323t4;Arachis_stenosperma|ArasteEVm021323t8;Arachis_hypogaea_Tifguard|ArahypEVm016609t2;Arachis_hypogaea_SunOleic_97R|ArahypEVm022623t2
cluster705	4	Q6IMT1	GO:0030307; P:positive regulation of cell growth; IMP:UniProtKB	Arachis_stenosperma|ArasteEVm000026t6;Arachis_stenosperma|ArasteEVm000026t3;Arachis_stenosperma|ArasteEVm002516t1;Valsten1|AravsEVm003884t1
cluster706	4	Q9M658	GO:0006344; P:maintenance of chromatin silencing; IMP:UniProtKB	Arachis_stenosperma|ArasteEVm000324t8;Arachis_stenosperma|ArasteEVm000324t2;Arachis_stenosperma|ArasteEVm000324t3;Arachis_hypogaea_Tifguard|ArahypEVm000107t4
cluster707	4	Q5XVI1	GO:0000387; P:spliceosomal snRNP assembly; IBA:GO_Central	Arachis_hypogaea_SunOleic_97R|ArahypEVm003261t2;Arachis_hypogaea_SunOleic_97R|ArahypEVm003261t1;Arachis_hypogaea_SunOleic_97R|ArahypEVm008782t1;Arachis_hypogaea_SunOleic_97R|ArahypEVm022276t2
cluster708	4	Q9LXG8	GO:0006952; P:defense response; IMP:TAIR	Arachis_hypogaea_SunOleic_97R|ArahypEVm006884t4;Arachis_hypogaea_SunOleic_97R|ArahypEVm006884t1;Arachis_hypogaea_SunOleic_97R|ArahypEVm006884t2;Arachis_hypogaea_SunOleic_97R|ArahypEVm006884t3
cluster709	4	O64884	GO:0006486; P:protein glycosylation; IEA:UniProtKB-UniPathway	Arachis_hypogaea_SunOleic_97R|ArahypEVm003523t3;Arachis_hypogaea_SunOleic_97R|ArahypEVm003523t1;Arachis_hypogaea_SunOleic_97R|ArahypEVm003523t4;Arachis_hypogaea_SunOleic_97R|ArahypEVm003523t2
cluster710	4	Q9HBJ2	GO:0006805; P:xenobiotic metabolic process; NAS:UniProtKB	Arachis_hypogaea_SunOleic_97R|ArahypEVm012618t3;Arachis_hypogaea_SunOleic_97R|ArahypEVm012618t1;Arachis_hypogaea_SunOleic_97R|ArahypEVm012618t4;Arachis_valida|AravalEVm022881t1
cluster711	4	N/A	N/A	Arachis_hypogaea_SunOleic_97R|ArahypEVm014993t3;Arachis_hypogaea_SunOleic_97R|ArahypEVm014993t1;Arachis_hypogaea_SunOleic_97R|ArahypEVm014993t2;Arachis_hypogaea_SunOleic_97R|ArahypEVm014993t5
cluster712	4	Q9ZPE7	GO:0009741; P:response to brassinosteroid; IMP:TAIR	Arachis_hypogaea_SunOleic_97R|ArahypEVm012648t1;Arachis_hypogaea_SunOleic_97R|ArahypEVm012794t1;Arachis_hypogaea_SunOleic_97R|ArahypEVm012794t2;Arachis_hypogaea_SunOleic_97R|ArahypEVm012794t3
cluster713	4	Q9SHF3	GO:0006417; P:regulation of translation; IEA:UniProtKB-KW	Arachis_hypogaea_SunOleic_97R|ArahypEVm000558t2;Arachis_hypogaea_SunOleic_97R|ArahypEVm000558t1;Arachis_hypogaea_Tifguard|ArahypEVm000558t2;Arachis_stenosperma|ArasteEVm001089t3
cluster714	4	N/A	N/A	Arachis_hypogaea_SunOleic_97R|ArahypEVm003433t6;Arachis_hypogaea_SunOleic_97R|ArahypEVm003433t12;Arachis_hypogaea_SunOleic_97R|ArahypEVm003433t13;Arachis_hypogaea_SunOleic_97R|ArahypEVm003433t8
cluster715	4	Q9SX38	GO:0006952; P:defense response; IEA:UniProtKB-KW	Arachis_hypogaea_SunOleic_97R|ArahypEVm000405t12;Arachis_hypogaea_SunOleic_97R|ArahypEVm000405t13;Valsten1|AravsEVm001175t4;Arachis_hypogaea_Tifguard|ArahypEVm000405t13
cluster716	4	Q9UKA2	GO:0006511; P:ubiquitin-dependent protein catabolic process; IBA:GO_Central	Arachis_hypogaea_SunOleic_97R|ArahypEVm003209t6;Arachis_hypogaea_SunOleic_97R|ArahypEVm003209t1;Valsten1|AravsEVm032065t1;Arachis_stenosperma|ArasteEVm004489t4
cluster717	4	Q9SZJ2	GO:2000028; P:regulation of photoperiodism, flowering; IMP:TAIR	Arachis_hypogaea_SunOleic_97R|ArahypEVm001902t8;Arachis_hypogaea_SunOleic_97R|ArahypEVm001902t1;Arachis_hypogaea_SunOleic_97R|ArahypEVm001902t5;Arachis_hypogaea_SunOleic_97R|ArahypEVm001902t7
cluster718	4	Q9LYC8	GO:0000122; P:negative regulation of transcription by RNA polymerase II; IDA:TAIR	Arachis_hypogaea_SunOleic_97R|ArahypEVm038223t1;Arachis_hypogaea_SunOleic_97R|ArahypEVm036726t1;Arachis_hypogaea_SunOleic_97R|ArahypEVm036726t2;Arachis_hypogaea_SunOleic_97R|ArahypEVm038223t2
cluster719	4	Q9SWX9	GO:0010112; P:regulation of systemic acquired resistance; IEP:TAIR	Arachis_hypogaea_SunOleic_97R|ArahypEVm007041t6;Arachis_hypogaea_SunOleic_97R|ArahypEVm007041t10;Arachis_hypogaea_SunOleic_97R|ArahypEVm007041t9;Arachis_hypogaea_Tifguard|ArahypEVm007041t11
cluster720	4	Q9S9N9	GO:0009409; P:response to cold; IEP:TAIR	Arachis_hypogaea_SunOleic_97R|ArahypEVm011795t2;Arachis_hypogaea_SunOleic_97R|ArahypEVm011643t1;Arachis_hypogaea_SunOleic_97R|ArahypEVm011643t2;Arachis_hypogaea_SunOleic_97R|ArahypEVm011795t1
cluster721	4	P48422	GO:0010345; P:suberin biosynthetic process; IMP:TAIR	Arachis_hypogaea_SunOleic_97R|ArahypEVm006004t1;Arachis_hypogaea_SunOleic_97R|ArahypEVm003479t1;Arachis_hypogaea_SunOleic_97R|ArahypEVm004952t1;Arachis_hypogaea_SunOleic_97R|ArahypEVm015057t1
cluster722	4	Q9FKE7	GO:0050661; F:NADP binding; IEA:InterPro	Arachis_hypogaea_SunOleic_97R|ArahypEVm004835t8;Arachis_hypogaea_SunOleic_97R|ArahypEVm004835t10;Arachis_hypogaea_SunOleic_97R|ArahypEVm004835t11;Valsten1|AravsEVm006297t4
cluster723	4	Q9LYC6	GO:0000122; P:negative regulation of transcription by RNA polymerase II; IDA:TAIR	Arachis_hypogaea_SunOleic_97R|ArahypEVm038220t1;Arachis_hypogaea_SunOleic_97R|ArahypEVm027826t1;Arachis_hypogaea_SunOleic_97R|ArahypEVm027826t2;Arachis_hypogaea_SunOleic_97R|ArahypEVm038220t2
cluster724	4	Q9M9E8	GO:0005829; C:cytosol; IDA:TAIR	Arachis_hypogaea_SunOleic_97R|ArahypEVm000642t3;Arachis_hypogaea_SunOleic_97R|ArahypEVm000642t5;Arachis_hypogaea_Tifguard|ArahypEVm006048t10;Arachis_stenosperma|ArasteEVm004892t5
cluster725	4	Q8LPS1	GO:0010193; P:response to ozone; IEP:UniProtKB	Arachis_hypogaea_SunOleic_97R|ArahypEVm010822t5;Arachis_hypogaea_SunOleic_97R|ArahypEVm010822t6;Arachis_stenosperma|ArasteEVm003640t4;Arachis_valida|AravalEVm003795t6
cluster726	4	P09756	GO:0009416; P:response to light stimulus; IBA:GO_Central	Arachis_valida|AravalEVm029724t1;Arachis_valida|AravalEVm029707t1;Arachis_hypogaea_Tifguard|ArahypEVm015606t1;Arachis_hypogaea_SunOleic_97R|ArahypEVm015606t1
cluster727	4	Q32S26	GO:0006357; P:regulation of transcription by RNA polymerase II; ISS:UniProtKB	Arachis_stenosperma|ArasteEVm000793t2;Arachis_hypogaea_Tifguard|ArahypEVm004601t7;Arachis_hypogaea_SunOleic_97R|ArahypEVm004601t7;Arachis_hypogaea_SunOleic_97R|ArahypEVm004601t10
cluster728	4	Q9FMR3	GO:0003700; F:DNA-binding transcription factor activity; ISS:TAIR	Valsten1|AravsEVm020811t4;Arachis_hypogaea_Tifguard|ArahypEVm016073t1;Arachis_hypogaea_SunOleic_97R|ArahypEVm016073t1;Arachis_valida|AravalEVm029983t1
cluster729	4	Q9SCZ4	GO:0010118; P:stomatal movement; IGI:TAIR	Valsten1|AravsEVm001302t7;Arachis_hypogaea_Tifguard|ArahypEVm001049t1;Arachis_stenosperma|ArasteEVm001894t1;Arachis_hypogaea_SunOleic_97R|ArahypEVm001049t1
cluster730	4	N/A	N/A	Valsten1|AravsEVm007788t5;Arachis_stenosperma|ArasteEVm027066t2;Arachis_valida|AravalEVm029502t5;Arachis_valida|AravalEVm051949t1
cluster731	4	Q50EK4	GO:0016705; F:oxidoreductase activity, acting on paired donors, with incorporation or reduction of molecular oxygen; IEA:InterPro	Valsten1|AravsEVm016426t1;Arachis_hypogaea_Tifguard|ArahypEVm004388t2;Arachis_hypogaea_SunOleic_97R|ArahypEVm004388t1;Arachis_hypogaea_Tifguard|ArahypEVm004388t1
cluster732	4	N/A	N/A	Valsten1|AravsEVm014748t2;Arachis_hypogaea_Tifguard|ArahypEVm011869t6;Arachis_hypogaea_SunOleic_97R|ArahypEVm011869t9;Arachis_hypogaea_SunOleic_97R|ArahypEVm011869t6
cluster733	4	F4JTU7	GO:0048767; P:root hair elongation; IMP:UniProtKB	Valsten1|AravsEVm004214t1;Arachis_hypogaea_Tifguard|ArahypEVm000315t1;Arachis_hypogaea_SunOleic_97R|ArahypEVm000315t4;Arachis_hypogaea_Tifguard|ArahypEVm000315t4
cluster734	4	N/A	N/A	Valsten1|AravsEVm007127t4;Arachis_hypogaea_Tifguard|ArahypEVm003950t8;Arachis_hypogaea_SunOleic_97R|ArahypEVm003950t6;Arachis_hypogaea_SunOleic_97R|ArahypEVm003950t8
cluster735	4	O31633	GO:0008999; F:ribosomal-protein-alanine N-acetyltransferase activity; IBA:GO_Central	Valsten1|AravsEVm041802t1;Arachis_hypogaea_Tifguard|ArahypEVm021385t1;Arachis_stenosperma|ArasteEVm063160t1;Arachis_hypogaea_SunOleic_97R|ArahypEVm021385t1
cluster736	4	Q9SSE9	GO:0060969; P:negative regulation of gene silencing; IMP:UniProtKB	Valsten1|AravsEVm000173t5;Arachis_hypogaea_Tifguard|ArahypEVm000490t2;Arachis_stenosperma|ArasteEVm000927t6;Arachis_hypogaea_SunOleic_97R|ArahypEVm000603t13
cluster737	4	O03982	GO:0030001; P:metal ion transport; IEA:InterPro	Arachis_hypogaea_Tifguard|ArahypEVm027075t2;Arachis_hypogaea_SunOleic_97R|ArahypEVm027075t1;Arachis_valida|AravalEVm058065t1;Arachis_hypogaea_SunOleic_97R|ArahypEVm027102t1
cluster738	4	N/A	N/A	Arachis_hypogaea_Tifguard|ArahypEVm008769t2;Arachis_stenosperma|ArasteEVm005467t8;Arachis_hypogaea_SunOleic_97R|ArahypEVm008769t2;Arachis_hypogaea_SunOleic_97R|ArahypEVm010874t1
cluster739	4	Q9LXB5	GO:0010228; P:vegetative to reproductive phase transition of meristem; IBA:GO_Central	Arachis_hypogaea_Tifguard|ArahypEVm029018t1;Arachis_hypogaea_SunOleic_97R|ArahypEVm029018t1;Arachis_hypogaea_Tifguard|ArahypEVm029018t2;Arachis_stenosperma|ArasteEVm050763t1
cluster740	4	N/A	N/A	Arachis_hypogaea_Tifguard|ArahypEVm018261t2;Arachis_stenosperma|ArasteEVm023730t1;Arachis_hypogaea_SunOleic_97R|ArahypEVm018261t2;Arachis_hypogaea_SunOleic_97R|ArahypEVm018266t1
cluster741	4	Q8L608	GO:0004566; F:beta-glucuronidase activity; ISS:TAIR	Arachis_hypogaea_Tifguard|ArahypEVm004180t4;Arachis_stenosperma|ArasteEVm006534t3;Arachis_hypogaea_Tifguard|ArahypEVm004235t6;Arachis_hypogaea_SunOleic_97R|ArahypEVm004235t6
cluster742	4	P35334	GO:0006952; P:defense response; IEA:UniProtKB-KW	Arachis_hypogaea_Tifguard|ArahypEVm010913t1;Arachis_hypogaea_SunOleic_97R|ArahypEVm010913t1;Arachis_valida|AravalEVm020960t1;Arachis_hypogaea_SunOleic_97R|ArahypEVm011378t2
cluster743	4	Q8GYA4	GO:0006468; P:protein phosphorylation; IBA:GO_Central	Arachis_hypogaea_Tifguard|ArahypEVm000752t5;Arachis_hypogaea_SunOleic_97R|ArahypEVm000752t5;Arachis_valida|AravalEVm001827t5;Arachis_stenosperma|ArasteEVm002847t2
cluster744	4	Q4TU14	GO:0051726; P:regulation of cell cycle; IGI:TAIR	Arachis_hypogaea_Tifguard|ArahypEVm012172t6;Arachis_stenosperma|ArasteEVm012982t3;Arachis_hypogaea_Tifguard|ArahypEVm012172t3;Arachis_hypogaea_SunOleic_97R|ArahypEVm012172t3
cluster745	4	Q3E6P4	GO:0009793; P:embryo development ending in seed dormancy; IMP:TAIR	Arachis_hypogaea_Tifguard|ArahypEVm015365t3;Arachis_stenosperma|ArasteEVm019505t2;Arachis_hypogaea_SunOleic_97R|ArahypEVm015365t3;Arachis_hypogaea_SunOleic_97R|ArahypEVm015365t2
cluster746	4	F4HY56	GO:0006351; P:transcription, DNA-templated; IEA:InterPro	Arachis_hypogaea_Tifguard|ArahypEVm000090t12;Arachis_stenosperma|ArasteEVm000133t2;Arachis_hypogaea_SunOleic_97R|ArahypEVm000090t11;Arachis_stenosperma|ArasteEVm000133t4
cluster747	4	Q39231	GO:0005985; P:sucrose metabolic process; IEA:UniProtKB-UniPathway	Arachis_hypogaea_Tifguard|ArahypEVm005067t5;Arachis_stenosperma|ArasteEVm006846t2;Arachis_hypogaea_Tifguard|ArahypEVm007613t3;Arachis_hypogaea_SunOleic_97R|ArahypEVm007613t3
cluster748	4	Q9C637	GO:0005886; C:plasma membrane; IEA:UniProtKB-SubCell	Arachis_hypogaea_Tifguard|ArahypEVm000461t1;Arachis_hypogaea_SunOleic_97R|ArahypEVm000461t1;Arachis_hypogaea_Tifguard|ArahypEVm000461t9;Arachis_stenosperma|ArasteEVm000985t3
cluster749	4	F4IHS2	GO:0009611; P:response to wounding; IEP:TAIR	Arachis_hypogaea_Tifguard|ArahypEVm000003t2;Arachis_stenosperma|ArasteEVm000354t6;Arachis_valida|AravalEVm003727t1;Arachis_stenosperma|ArasteEVm000043t2
cluster750	4	Q39224	GO:0010150; P:leaf senescence; IEP:TAIR	Arachis_hypogaea_Tifguard|ArahypEVm010393t1;Arachis_hypogaea_SunOleic_97R|ArahypEVm010393t1;Arachis_valida|AravalEVm028297t3;Arachis_hypogaea_SunOleic_97R|ArahypEVm010393t3
cluster751	4	N/A	N/A	Arachis_hypogaea_Tifguard|ArahypEVm017853t1;Arachis_stenosperma|ArasteEVm023093t1;Arachis_hypogaea_SunOleic_97R|ArahypEVm009584t1;Arachis_valida|AravalEVm025206t4
cluster752	3	P08157	GO:0006567; P:threonine catabolic process; IMP:AspGD	Arachis_valida|AravalEVm008301t1;Arachis_valida|AravalEVm008850t1;Arachis_valida|AravalEVm010186t2
cluster753	3	P38088	GO:0070150; P:mitochondrial glycyl-tRNA aminoacylation; IMP:SGD	Arachis_valida|AravalEVm003606t2;Arachis_valida|AravalEVm004181t1;Arachis_stenosperma|ArasteEVm006348t1
cluster754	3	Q9P7L4	GO:0006572; P:tyrosine catabolic process; ISM:PomBase	Arachis_valida|AravalEVm032445t2;Arachis_valida|AravalEVm034590t1;Arachis_hypogaea_SunOleic_97R|ArahypEVm019074t2
cluster755	3	Q9ZQI3	GO:0016042; P:lipid catabolic process; IEA:UniProtKB-KW	Arachis_valida|AravalEVm016813t3;Arachis_valida|AravalEVm017053t2;Arachis_valida|AravalEVm015015t4
cluster756	3	Q10422	GO:0016573; P:histone acetylation; ISS:PomBase	Arachis_valida|AravalEVm021047t1;Arachis_valida|AravalEVm012258t4;Arachis_valida|AravalEVm016002t3
cluster757	3	P27393	GO:0005201; F:extracellular matrix structural constituent; IEA:InterPro	Arachis_valida|AravalEVm000155t1;Arachis_valida|AravalEVm000155t2;Arachis_stenosperma|ArasteEVm000115t2
cluster758	3	E9FCP7	GO:0019752; P:carboxylic acid metabolic process; IEA:InterPro	Arachis_valida|AravalEVm010079t1;Arachis_valida|AravalEVm005959t1;Arachis_valida|AravalEVm008075t2
cluster759	3	Q8LKS5	GO:0009651; P:response to salt stress; IEP:TAIR	Arachis_valida|AravalEVm004069t1;Arachis_valida|AravalEVm003883t1;Arachis_valida|AravalEVm004047t1
cluster760	3	M9P6Z1	GO:0009416; P:response to light stimulus; IMP:UniProtKB	Arachis_valida|AravalEVm001168t2;Arachis_valida|AravalEVm001168t1;Arachis_stenosperma|ArasteEVm000288t2
cluster761	3	Q874I4	GO:0009220; P:pyrimidine ribonucleotide biosynthetic process; IBA:GO_Central	Arachis_valida|AravalEVm012133t6;Arachis_valida|AravalEVm010529t1;Arachis_valida|AravalEVm012133t5
cluster762	3	Q870Y1	GO:0006486; P:protein glycosylation; IBA:GO_Central	Arachis_valida|AravalEVm013070t2;Arachis_valida|AravalEVm014696t1;Arachis_valida|AravalEVm015969t1
cluster763	3	Q6NQE2	GO:0055114; P:oxidation-reduction process; IBA:GO_Central	Arachis_valida|AravalEVm084532t2;Arachis_valida|AravalEVm084532t1;Valsten1|AravsEVm076358t1
cluster764	3	O60100	GO:0006610; P:ribosomal protein import into nucleus; IBA:GO_Central	Arachis_valida|AravalEVm000933t3;Arachis_valida|AravalEVm000933t4;Arachis_valida|AravalEVm002867t1
cluster765	3	B8N8Q9	GO:0052690; F:trichloro-p-hydroquinone reductive dehalogenase activity; IEA:UniProtKB-EC	Arachis_valida|AravalEVm016866t1;Arachis_valida|AravalEVm014608t1;Arachis_valida|AravalEVm014674t1
cluster766	3	O80689	GO:0005975; P:carbohydrate metabolic process; IEA:InterPro	Arachis_valida|AravalEVm009767t1;Arachis_valida|AravalEVm009767t2;Arachis_stenosperma|ArasteEVm006886t3
cluster767	3	Q7SXP8	GO:0009298; P:GDP-mannose biosynthetic process; IEA:UniProtKB-UniPathway	Arachis_valida|AravalEVm015106t3;Arachis_valida|AravalEVm015106t2;Arachis_stenosperma|ArasteEVm010576t8
cluster768	3	O44827	GO:1904659; P:glucose transmembrane transport; IDA:WormBase	Arachis_valida|AravalEVm029258t1;Arachis_valida|AravalEVm005265t1;Arachis_valida|AravalEVm005265t2
cluster769	3	Q49KZ8	GO:0018298; P:protein-chromophore linkage; IEA:UniProtKB-KW	Arachis_valida|AravalEVm003489t1;Arachis_valida|AravalEVm003489t2;Arachis_stenosperma|ArasteEVm002580t1
cluster770	3	B8NE46	GO:0045490; P:pectin catabolic process; ISS:UniProtKB	Arachis_valida|AravalEVm022751t1;Arachis_valida|AravalEVm013387t4;Arachis_valida|AravalEVm022772t1
cluster771	3	Q4P914	GO:0042744; P:hydrogen peroxide catabolic process; IBA:GO_Central	Arachis_valida|AravalEVm007000t2;Arachis_valida|AravalEVm003075t1;Arachis_valida|AravalEVm003528t1
cluster772	3	O59936	GO:0006412; P:translation; IEA:InterPro	Arachis_valida|AravalEVm054098t2;Arachis_valida|AravalEVm054098t1;Arachis_valida|AravalEVm054467t1
cluster773	3	Q26636	GO:0007275; P:multicellular organism development; IEA:UniProtKB-KW	Arachis_valida|AravalEVm021580t2;Arachis_valida|AravalEVm021580t1;Valsten1|AravsEVm014536t2
cluster774	3	O22927	GO:0016042; P:lipid catabolic process; IEA:UniProtKB-KW	Arachis_valida|AravalEVm018573t1;Arachis_valida|AravalEVm018623t4;Arachis_valida|AravalEVm019435t1
cluster775	3	P34736	GO:0004802; F:transketolase activity; IEA:UniProtKB-EC	Arachis_valida|AravalEVm004510t1;Arachis_valida|AravalEVm004519t1;Arachis_valida|AravalEVm028849t1
cluster776	3	P51414	GO:0042273; P:ribosomal large subunit biogenesis; IBA:GO_Central	Arachis_valida|AravalEVm050303t2;Arachis_valida|AravalEVm050303t1;Arachis_stenosperma|ArasteEVm039601t5
cluster777	3	O18598	GO:0004364; F:glutathione transferase activity; IEA:UniProtKB-EC	Arachis_valida|AravalEVm037803t2;Arachis_valida|AravalEVm035426t1;Arachis_valida|AravalEVm039174t1
cluster778	3	O15034	GO:0007274; P:neuromuscular synaptic transmission; IBA:GO_Central	Arachis_valida|AravalEVm000629t4;Arachis_valida|AravalEVm000629t2;Arachis_valida|AravalEVm000629t3
cluster779	3	P80684	GO:0042302; F:structural constituent of cuticle; IEA:UniProtKB-KW	Arachis_valida|AravalEVm033098t2;Arachis_valida|AravalEVm033098t4;Valsten1|AravsEVm029696t4
cluster780	3	Q8H191	GO:0046208; P:spermine catabolic process; IEA:UniProtKB-UniPathway	Arachis_valida|AravalEVm017964t2;Arachis_valida|AravalEVm017964t1;Arachis_hypogaea_Tifguard|ArahypEVm013587t3
cluster781	3	Q4WS70	GO:0006855; P:drug transmembrane transport; IBA:GO_Central	Arachis_valida|AravalEVm016861t1;Arachis_valida|AravalEVm006520t2;Arachis_valida|AravalEVm018024t1
cluster782	3	P32332	GO:0008272; P:sulfate transport; IDA:SGD	Arachis_valida|AravalEVm051575t1;Arachis_valida|AravalEVm024264t1;Arachis_valida|AravalEVm032333t1
cluster783	3	Q7Y1W5	GO:0006952; P:defense response; IEA:InterPro	Arachis_valida|AravalEVm068589t16;Arachis_valida|AravalEVm068589t18;Arachis_valida|AravalEVm068589t19
cluster784	3	Q9C0Z7	GO:0042254; P:ribosome biogenesis; ISO:PomBase	Arachis_valida|AravalEVm033633t2;Arachis_valida|AravalEVm033634t3;Arachis_stenosperma|ArasteEVm022096t1
cluster785	3	A1DI25	GO:0001732; P:formation of cytoplasmic translation initiation complex; IEA:UniProtKB-UniRule	Arachis_valida|AravalEVm006903t1;Arachis_valida|AravalEVm007167t2;Arachis_valida|AravalEVm016441t1
cluster786	3	O60128	GO:0045739; P:positive regulation of DNA repair; IBA:GO_Central	Arachis_valida|AravalEVm029701t2;Arachis_valida|AravalEVm029701t1;Arachis_stenosperma|ArasteEVm020129t1
cluster787	3	Q9LJP4	GO:0071555; P:cell wall organization; IEA:UniProtKB-KW	Arachis_valida|AravalEVm004993t2;Arachis_valida|AravalEVm005548t1;Valsten1|AravsEVm002903t2
cluster788	3	P79046	GO:0045493; P:xylan catabolic process; IEA:UniProtKB-UniPathway	Arachis_valida|AravalEVm006361t2;Arachis_valida|AravalEVm006362t1;Arachis_valida|AravalEVm022431t1
cluster789	3	P07056	GO:0006122; P:mitochondrial electron transport, ubiquinol to cytochrome c; IBA:GO_Central	Arachis_valida|AravalEVm032829t1;Arachis_valida|AravalEVm033602t1;Arachis_stenosperma|ArasteEVm018964t1
cluster790	3	P52810	GO:0006412; P:translation; IEA:InterPro	Arachis_valida|AravalEVm042118t1;Arachis_valida|AravalEVm041933t1;Arachis_stenosperma|ArasteEVm027834t1
cluster791	3	A7LXU3	GO:2000899; P:xyloglucan catabolic process; IDA:UniProtKB	Arachis_valida|AravalEVm005584t1;Arachis_valida|AravalEVm005584t3;Arachis_hypogaea_SunOleic_97R|ArahypEVm004032t3
cluster792	3	Q0CI21	GO:0045493; P:xylan catabolic process; IEA:UniProtKB-KW	Arachis_valida|AravalEVm013683t1;Arachis_valida|AravalEVm003631t2;Arachis_valida|AravalEVm019521t1
cluster793	3	B0Y4Z4	GO:0045490; P:pectin catabolic process; ISS:UniProtKB	Arachis_valida|AravalEVm022612t2;Arachis_valida|AravalEVm018259t1;Arachis_valida|AravalEVm018494t1
cluster794	3	Q5KPJ5	GO:0009099; P:valine biosynthetic process; IEA:UniProtKB-UniPathway	Arachis_valida|AravalEVm013873t2;Arachis_valida|AravalEVm004320t1;Arachis_valida|AravalEVm004915t2
cluster795	3	N/A	N/A	Arachis_valida|AravalEVm016068t1;Arachis_valida|AravalEVm021365t1;Arachis_valida|AravalEVm028390t1
cluster796	3	Q92405	GO:0006979; P:response to oxidative stress; IBA:GO_Central	Arachis_valida|AravalEVm003713t1;Arachis_valida|AravalEVm003638t1;Arachis_valida|AravalEVm003638t3
cluster797	3	Q29466	GO:0007035; P:vacuolar acidification; IBA:GO_Central	Arachis_valida|AravalEVm002601t1;Arachis_valida|AravalEVm002256t2;Arachis_valida|AravalEVm002371t1
cluster798	3	N/A	N/A	Arachis_valida|AravalEVm004934t1;Arachis_valida|AravalEVm004934t2;Arachis_valida|AravalEVm004934t5
cluster799	3	Q9FXD8	GO:0045490; P:pectin catabolic process; IEA:UniProtKB-UniPathway	Arachis_valida|AravalEVm016537t1;Arachis_valida|AravalEVm015497t1;Arachis_hypogaea_SunOleic_97R|ArahypEVm014971t1
cluster800	3	Q92947	GO:0006568; P:tryptophan metabolic process; IEA:UniProtKB-UniPathway	Arachis_valida|AravalEVm014128t1;Arachis_valida|AravalEVm014294t3;Arachis_valida|AravalEVm014416t1
cluster801	3	Q5BLY5	GO:0003993; F:acid phosphatase activity; IEA:UniProtKB-EC	Arachis_valida|AravalEVm012810t1;Arachis_valida|AravalEVm015336t1;Arachis_valida|AravalEVm015450t1
cluster802	3	Q9SUW2	GO:0006166; P:purine ribonucleoside salvage; IEA:UniProtKB-KW	Arachis_valida|AravalEVm044119t1;Arachis_valida|AravalEVm039195t1;Arachis_valida|AravalEVm044119t2
cluster803	3	P43006	GO:0007632; P:visual behavior; IMP:MGI	Arachis_valida|AravalEVm008484t1;Arachis_valida|AravalEVm009665t1;Arachis_valida|AravalEVm009665t2
cluster804	3	O82200	GO:0019853; P:L-ascorbic acid biosynthetic process; IEA:UniProtKB-KW	Arachis_valida|AravalEVm023958t1;Arachis_valida|AravalEVm023416t1;Valsten1|AravsEVm024450t2
cluster805	3	N/A	N/A	Arachis_valida|AravalEVm004813t2;Arachis_valida|AravalEVm004813t1;Arachis_valida|AravalEVm004813t3
cluster806	3	P25333	GO:1903329; P:regulation of iron-sulfur cluster assembly; IMP:SGD	Arachis_valida|AravalEVm003660t1;Arachis_valida|AravalEVm002596t1;Arachis_valida|AravalEVm008329t1
cluster807	3	P54672	GO:0006886; P:intracellular protein transport; IEA:InterPro	Arachis_valida|AravalEVm024552t1;Arachis_valida|AravalEVm013154t1;Arachis_stenosperma|ArasteEVm009970t3
cluster808	3	Q10475	GO:0042273; P:ribosomal large subunit biogenesis; ISO:PomBase	Arachis_valida|AravalEVm000338t3;Arachis_valida|AravalEVm013804t1;Arachis_valida|AravalEVm013804t2
cluster809	3	P10255	GO:0006457; P:protein folding; IBA:GO_Central	Arachis_valida|AravalEVm047629t1;Arachis_valida|AravalEVm047629t5;Valsten1|AravsEVm024453t1
cluster810	3	P40098	GO:0031966; C:mitochondrial membrane; IEA:UniProtKB-SubCell	Arachis_valida|AravalEVm024567t1;Arachis_valida|AravalEVm028550t1;Arachis_valida|AravalEVm029714t1
cluster811	3	A1CMQ7	GO:0008380; P:RNA splicing; IEA:UniProtKB-KW	Arachis_valida|AravalEVm013386t1;Arachis_valida|AravalEVm013890t2;Arachis_hypogaea_Tifguard|ArahypEVm005472t16
cluster812	3	O93796	GO:0006415; P:translational termination; IEA:EnsemblFungi	Arachis_valida|AravalEVm001038t1;Arachis_valida|AravalEVm001038t2;Arachis_stenosperma|ArasteEVm003222t2
cluster813	3	Q17NV8	GO:0015771; P:trehalose transport; ISS:UniProtKB	Arachis_valida|AravalEVm009267t1;Arachis_valida|AravalEVm012306t1;Arachis_valida|AravalEVm011225t1
cluster814	3	P77376	GO:0016491; F:oxidoreductase activity; IEA:UniProtKB-KW	Arachis_valida|AravalEVm019037t1;Arachis_valida|AravalEVm019239t1;Arachis_valida|AravalEVm022222t2
cluster815	3	F4IN23	GO:0045893; P:positive regulation of transcription, DNA-templated; IDA:TAIR	Arachis_valida|AravalEVm018643t1;Arachis_valida|AravalEVm018914t2;Arachis_valida|AravalEVm021722t1
cluster816	3	Q4P7Y8	GO:0006696; P:ergosterol biosynthetic process; IBA:GO_Central	Arachis_valida|AravalEVm020173t1;Arachis_valida|AravalEVm021890t1;Arachis_valida|AravalEVm022107t2
cluster817	3	Q9LYB4	GO:0006979; P:response to oxidative stress; IEA:InterPro	Arachis_valida|AravalEVm047713t3;Arachis_valida|AravalEVm047713t2;Arachis_stenosperma|ArasteEVm031400t3
cluster818	3	Q9SND9	GO:0016747; F:transferase activity, transferring acyl groups other than amino-acyl groups; IEA:InterPro	Arachis_valida|AravalEVm012202t1;Arachis_valida|AravalEVm013155t1;Arachis_stenosperma|ArasteEVm008594t2
cluster819	3	Q12526	GO:0009847; P:spore germination; IMP:AspGD	Arachis_valida|AravalEVm037858t1;Arachis_valida|AravalEVm040939t1;Arachis_stenosperma|ArasteEVm028985t1
cluster820	3	Q9UR06	GO:1901565; P:organonitrogen compound catabolic process; IBA:GO_Central	Arachis_valida|AravalEVm054729t2;Arachis_valida|AravalEVm051190t1;Arachis_valida|AravalEVm060782t1
cluster821	3	O59826	GO:0034765; P:regulation of ion transmembrane transport; IEA:UniProtKB-KW	Arachis_valida|AravalEVm038963t1;Arachis_valida|AravalEVm019909t1;Arachis_valida|AravalEVm022131t3
cluster822	3	O55647	GO:0019062; P:virion attachment to host cell; IEA:UniProtKB-KW	Arachis_valida|AravalEVm000819t1;Arachis_valida|AravalEVm000819t2;Valsten1|AravsEVm000559t1
cluster823	3	Q9T072	GO:0006355; P:regulation of transcription, DNA-templated; TAS:TAIR	Arachis_valida|AravalEVm021345t4;Arachis_valida|AravalEVm021345t5;Arachis_valida|AravalEVm021345t6
cluster824	3	P21373	GO:0006741; P:NADP biosynthetic process; IDA:SGD	Arachis_valida|AravalEVm005006t2;Arachis_valida|AravalEVm005006t1;Arachis_stenosperma|ArasteEVm006553t2
cluster825	3	Q9W4T4	GO:0040040; P:thermosensory behavior; IMP:FlyBase	Arachis_valida|AravalEVm005062t1;Arachis_valida|AravalEVm005062t2;Arachis_stenosperma|ArasteEVm003767t3
cluster826	3	Q9SDL8	GO:0005975; P:carbohydrate metabolic process; IEA:UniProtKB-KW	Arachis_valida|AravalEVm020367t1;Arachis_valida|AravalEVm019921t1;Arachis_stenosperma|ArasteEVm014481t6
cluster827	3	N/A	N/A	Arachis_valida|AravalEVm073496t2;Arachis_valida|AravalEVm073496t1;Valsten1|AravsEVm057009t4
cluster828	3	Q9P784	GO:0002181; P:cytoplasmic translation; ISO:PomBase	Arachis_valida|AravalEVm018182t5;Arachis_valida|AravalEVm018182t7;Arachis_valida|AravalEVm019077t1
cluster829	3	D4ATS1	GO:0005576; C:extracellular region; IEA:UniProtKB-SubCell	Arachis_valida|AravalEVm043126t1;Arachis_valida|AravalEVm029685t1;Arachis_valida|AravalEVm044068t1
cluster830	3	P32795	GO:0006508; P:proteolysis; IBA:GO_Central	Arachis_valida|AravalEVm002624t3;Arachis_valida|AravalEVm002624t1;Arachis_valida|AravalEVm003559t1
cluster831	3	Q9HWH9	GO:0009636; P:response to toxic substance; IEA:UniProtKB-KW	Arachis_valida|AravalEVm020373t1;Arachis_valida|AravalEVm019148t3;Arachis_valida|AravalEVm019725t1
cluster832	3	Q96X45	GO:0006414; P:translational elongation; IBA:GO_Central	Arachis_valida|AravalEVm002453t2;Arachis_valida|AravalEVm002453t5;Arachis_stenosperma|ArasteEVm003614t2
cluster833	3	M2YJQ2	GO:0016491; F:oxidoreductase activity; IEA:UniProtKB-KW	Arachis_valida|AravalEVm017415t1;Arachis_valida|AravalEVm024220t1;Arachis_valida|AravalEVm021774t1
cluster834	3	Q39176	GO:0009651; P:response to salt stress; IMP:TAIR	Arachis_valida|AravalEVm054446t1;Arachis_valida|AravalEVm037844t1;Arachis_valida|AravalEVm061769t1
cluster835	3	B0Y473	GO:0030435; P:sporulation resulting in formation of a cellular spore; IEA:UniProtKB-KW	Arachis_valida|AravalEVm010591t1;Arachis_valida|AravalEVm019324t3;Arachis_stenosperma|ArasteEVm000856t2
cluster836	3	N/A	N/A	Arachis_valida|AravalEVm020249t3;Arachis_valida|AravalEVm020249t7;Arachis_stenosperma|ArasteEVm013954t1
cluster837	3	Q92413	GO:0055129; P:L-proline biosynthetic process; IEA:UniProtKB-UniPathway	Arachis_valida|AravalEVm012735t1;Arachis_valida|AravalEVm011196t1;Arachis_valida|AravalEVm011656t1
cluster838	3	O42622	GO:1903134; P:trehalose catabolic process involved in cellular response to stress; IEA:EnsemblFungi	Arachis_valida|AravalEVm003672t2;Arachis_valida|AravalEVm005390t1;Arachis_valida|AravalEVm005589t1
cluster839	3	Q7Z8E7	GO:0046168; P:glycerol-3-phosphate catabolic process; IEA:InterPro	Arachis_valida|AravalEVm009818t2;Arachis_valida|AravalEVm017367t6;Valsten1|AravsEVm009072t2
cluster840	3	Q4W9B8	GO:0007035; P:vacuolar acidification; IBA:GO_Central	Arachis_valida|AravalEVm004820t2;Arachis_valida|AravalEVm002469t4;Arachis_valida|AravalEVm002990t2
cluster841	3	P17624	GO:0006457; P:protein folding; IBA:GO_Central	Arachis_valida|AravalEVm041272t1;Arachis_valida|AravalEVm043104t1;Arachis_stenosperma|ArasteEVm013943t1
cluster842	3	Q9VE00	GO:0017085; P:response to insecticide; IMP:FlyBase	Arachis_valida|AravalEVm009057t1;Arachis_valida|AravalEVm009130t1;Arachis_valida|AravalEVm009206t1
cluster843	3	Q94AQ9	GO:0009658; P:chloroplast organization; IMP:TAIR	Arachis_valida|AravalEVm030268t2;Arachis_valida|AravalEVm028102t5;Arachis_valida|AravalEVm030268t1
cluster844	3	Q9VCA2	GO:0006811; P:ion transport; IEA:UniProtKB-KW	Arachis_valida|AravalEVm023750t1;Arachis_valida|AravalEVm006725t1;Arachis_valida|AravalEVm016308t1
cluster845	3	Q24048	GO:0036376; P:sodium ion export across plasma membrane; IBA:GO_Central	Arachis_valida|AravalEVm024294t1;Arachis_valida|AravalEVm022577t1;Arachis_valida|AravalEVm023346t1
cluster846	3	P55251	GO:0009098; P:leucine biosynthetic process; IEA:UniProtKB-UniPathway	Arachis_valida|AravalEVm045434t1;Arachis_valida|AravalEVm003160t2;Arachis_valida|AravalEVm014551t1
cluster847	3	Q9UT19	GO:0019280; P:L-methionine biosynthetic process from homoserine via O-acetyl-L-homoserine and cystathionine; IMP:PomBase	Arachis_valida|AravalEVm012355t1;Arachis_valida|AravalEVm003250t1;Arachis_valida|AravalEVm003275t2
cluster848	3	Q1JPD3	GO:0022904; P:respiratory electron transport chain; IBA:GO_Central	Arachis_valida|AravalEVm010141t1;Arachis_valida|AravalEVm006949t1;Arachis_stenosperma|ArasteEVm012051t7
cluster849	3	P16622	GO:0006783; P:heme biosynthetic process; IMP:SGD	Arachis_valida|AravalEVm014821t1;Arachis_valida|AravalEVm014234t1;Valsten1|AravsEVm007557t2
cluster850	3	B0Y004	GO:0030435; P:sporulation resulting in formation of a cellular spore; IEA:UniProtKB-KW	Arachis_valida|AravalEVm043119t2;Arachis_valida|AravalEVm043121t1;Arachis_valida|AravalEVm044494t1
cluster851	3	Q6NQE2	GO:0055114; P:oxidation-reduction process; IBA:GO_Central	Arachis_valida|AravalEVm039855t1;Arachis_valida|AravalEVm039855t2;Arachis_stenosperma|ArasteEVm026167t2
cluster852	3	N/A	N/A	Arachis_valida|AravalEVm042209t2;Arachis_valida|AravalEVm042209t1;Arachis_hypogaea_SunOleic_97R|ArahypEVm024074t1
cluster853	3	Q99385	GO:0055085; P:transmembrane transport; IDA:SGD	Arachis_valida|AravalEVm003249t1;Arachis_valida|AravalEVm013337t1;Arachis_hypogaea_SunOleic_97R|ArahypEVm014593t6
cluster854	3	O81027	GO:0006629; P:lipid metabolic process; IBA:GO_Central	Arachis_valida|AravalEVm012760t5;Arachis_valida|AravalEVm012760t1;Arachis_hypogaea_Tifguard|ArahypEVm007971t8
cluster855	3	N/A	N/A	Arachis_valida|AravalEVm026024t1;Arachis_valida|AravalEVm026024t3;Valsten1|AravsEVm017498t6
cluster856	3	V5XYR2	GO:0008299; P:isoprenoid biosynthetic process; IEA:InterPro	Arachis_valida|AravalEVm018663t1;Arachis_valida|AravalEVm012513t1;Arachis_valida|AravalEVm033497t1
cluster857	3	P35128	GO:0051124; P:synaptic growth at neuromuscular junction; IMP:FlyBase	Arachis_valida|AravalEVm054465t1;Arachis_valida|AravalEVm053695t1;Arachis_stenosperma|ArasteEVm023436t1
cluster858	3	A0A0B4K692	GO:0046692; P:sperm competition; IMP:FlyBase	Arachis_valida|AravalEVm003686t1;Arachis_valida|AravalEVm003791t1;Arachis_valida|AravalEVm005911t1
cluster859	3	Q8VWN6	GO:0005975; P:carbohydrate metabolic process; IEA:UniProtKB-KW	Arachis_valida|AravalEVm003169t1;Arachis_valida|AravalEVm003169t2;Arachis_valida|AravalEVm003169t3
cluster860	3	O14359	GO:0016787; F:hydrolase activity; IEA:InterPro	Arachis_valida|AravalEVm023157t3;Arachis_valida|AravalEVm031463t1;Arachis_valida|AravalEVm031475t1
cluster861	3	Q93XX5	GO:0006629; P:lipid metabolic process; IEA:InterPro	Arachis_valida|AravalEVm013399t1;Arachis_valida|AravalEVm013399t2;Arachis_hypogaea_SunOleic_97R|ArahypEVm006200t5
cluster862	3	P23704	GO:0042776; P:mitochondrial ATP synthesis coupled proton transport; IEA:EnsemblFungi	Arachis_valida|AravalEVm009385t3;Arachis_valida|AravalEVm009385t5;Arachis_stenosperma|ArasteEVm006762t1
cluster863	3	N/A	N/A	Arachis_valida|AravalEVm089826t1;Arachis_valida|AravalEVm089440t1;Arachis_valida|AravalEVm089826t2
cluster864	3	N/A	N/A	Arachis_valida|AravalEVm059456t3;Arachis_valida|AravalEVm066174t2;Arachis_valida|AravalEVm069831t3
cluster865	3	Q756P0	GO:0031167; P:rRNA methylation; IBA:GO_Central	Arachis_valida|AravalEVm023650t1;Arachis_valida|AravalEVm023650t2;Arachis_stenosperma|ArasteEVm014404t1
cluster866	3	Q9VBV3	GO:0007622; P:rhythmic behavior; TAS:FlyBase	Arachis_valida|AravalEVm031385t1;Arachis_valida|AravalEVm030559t1;Arachis_valida|AravalEVm030645t1
cluster867	3	O76081	GO:0008277; P:regulation of G protein-coupled receptor signaling pathway; TAS:ProtInc	Arachis_valida|AravalEVm021509t1;Arachis_valida|AravalEVm001472t1;Arachis_valida|AravalEVm009801t1
cluster868	3	Q01359	GO:0006123; P:mitochondrial electron transport, cytochrome c to oxygen; IBA:GO_Central	Arachis_valida|AravalEVm051632t1;Arachis_valida|AravalEVm051851t1;Arachis_valida|AravalEVm056776t1
cluster869	3	Q0C7P6	GO:0000272; P:polysaccharide catabolic process; IEA:UniProtKB-KW	Arachis_valida|AravalEVm011211t5;Arachis_valida|AravalEVm011211t3;Arachis_stenosperma|ArasteEVm007965t1
cluster870	3	Q7SYH5	GO:0006814; P:sodium ion transport; IEA:UniProtKB-KW	Arachis_valida|AravalEVm004031t1;Arachis_valida|AravalEVm005524t1;Arachis_valida|AravalEVm015069t1
cluster871	3	P49024	GO:0035994; P:response to muscle stretch; IDA:AgBase	Arachis_valida|AravalEVm008993t5;Arachis_valida|AravalEVm008993t2;Arachis_valida|AravalEVm008993t4
cluster872	3	Q00649	GO:0009408; P:response to heat; IDA:AgBase	Arachis_valida|AravalEVm024401t2;Arachis_valida|AravalEVm024401t1;Arachis_valida|AravalEVm024401t3
cluster873	3	N/A	N/A	Arachis_valida|AravalEVm034771t1;Arachis_valida|AravalEVm034771t2;Arachis_valida|AravalEVm034771t3
cluster874	3	Q9D7P6	GO:0016226; P:iron-sulfur cluster assembly; IEA:InterPro	Arachis_valida|AravalEVm050976t1;Arachis_valida|AravalEVm039378t1;Arachis_valida|AravalEVm040466t3
cluster875	3	Q8VYR7	GO:0010036; P:response to boron-containing substance; IEP:UniProtKB	Arachis_valida|AravalEVm004589t3;Arachis_valida|AravalEVm004589t2;Arachis_hypogaea_SunOleic_97R|ArahypEVm004803t3
cluster876	3	Q9AT54	GO:0050275; F:scopoletin glucosyltransferase activity; IDA:UniProtKB	Arachis_valida|AravalEVm009981t1;Arachis_valida|AravalEVm010083t1;Arachis_valida|AravalEVm011889t1
cluster877	3	P38230	GO:0034599; P:cellular response to oxidative stress; IMP:SGD	Arachis_valida|AravalEVm018661t1;Arachis_valida|AravalEVm020434t1;Arachis_valida|AravalEVm026732t1
cluster878	3	P42283	GO:0006355; P:regulation of transcription, DNA-templated; IMP:FlyBase	Arachis_valida|AravalEVm008916t11;Arachis_valida|AravalEVm008916t8;Arachis_stenosperma|ArasteEVm006641t8
cluster879	3	Q9S9M5	GO:0007166; P:cell surface receptor signaling pathway; IBA:GO_Central	Arachis_valida|AravalEVm003773t8;Arachis_valida|AravalEVm003773t7;Valsten1|AravsEVm008664t1
cluster880	3	O94413	GO:0009156; P:ribonucleoside monophosphate biosynthetic process; IEA:InterPro	Arachis_valida|AravalEVm022969t1;Arachis_valida|AravalEVm011599t1;Arachis_valida|AravalEVm013822t1
cluster881	3	P22137	GO:0006898; P:receptor-mediated endocytosis; IBA:GO_Central	Arachis_valida|AravalEVm008590t3;Arachis_valida|AravalEVm022217t1;Arachis_valida|AravalEVm027757t1
cluster882	3	Q00614	GO:0006631; P:fatty acid metabolic process; IEA:UniProtKB-KW	Arachis_valida|AravalEVm005115t5;Arachis_valida|AravalEVm003329t1;Arachis_valida|AravalEVm005440t1
cluster883	3	Q84K71	GO:0015238; F:drug transmembrane transporter activity; IEA:InterPro	Arachis_valida|AravalEVm007224t3;Arachis_valida|AravalEVm007249t1;Arachis_valida|AravalEVm007249t2
cluster884	3	Q59X23	GO:0044011; P:single-species biofilm formation on inanimate substrate; IMP:CGD	Arachis_valida|AravalEVm003152t1;Arachis_valida|AravalEVm004552t1;Arachis_valida|AravalEVm022876t1
cluster885	3	Q5AUW8	GO:0004497; F:monooxygenase activity; IEA:UniProtKB-KW	Arachis_valida|AravalEVm020662t2;Arachis_valida|AravalEVm019498t1;Arachis_valida|AravalEVm020662t1
cluster886	3	P21243	GO:0043161; P:proteasome-mediated ubiquitin-dependent protein catabolic process; IDA:SGD	Arachis_valida|AravalEVm031231t4;Arachis_valida|AravalEVm031224t1;Arachis_stenosperma|ArasteEVm021373t1
cluster887	3	C8V213	GO:0009408; P:response to heat; IEA:InterPro	Arachis_valida|AravalEVm037189t1;Arachis_valida|AravalEVm008723t3;Arachis_stenosperma|ArasteEVm009430t3
cluster888	3	O42630	GO:0006508; P:proteolysis; IBA:GO_Central	Arachis_valida|AravalEVm016262t1;Arachis_valida|AravalEVm014875t1;Arachis_valida|AravalEVm016622t1
cluster889	3	Q4V8T0	GO:0019310; P:inositol catabolic process; ISS:UniProtKB	Arachis_valida|AravalEVm026071t3;Arachis_valida|AravalEVm023191t1;Arachis_valida|AravalEVm024480t2
cluster890	3	O23755	GO:0003746; F:translation elongation factor activity; IEA:UniProtKB-KW	Arachis_valida|AravalEVm002568t1;Arachis_valida|AravalEVm002568t3;Valsten1|AravsEVm001626t2
cluster891	3	P54898	GO:0006526; P:arginine biosynthetic process; IBA:GO_Central	Arachis_valida|AravalEVm018472t1;Arachis_valida|AravalEVm003343t1;Arachis_valida|AravalEVm009530t4
cluster892	3	Q9SGJ6	GO:0048510; P:regulation of timing of transition from vegetative to reproductive phase; IMP:TAIR	Arachis_valida|AravalEVm027956t1;Arachis_valida|AravalEVm031236t1;Arachis_hypogaea_SunOleic_97R|ArahypEVm014228t1
cluster893	3	P20178	GO:0009058; P:biosynthetic process; IEA:InterPro	Arachis_valida|AravalEVm016894t3;Arachis_valida|AravalEVm016881t2;Arachis_valida|AravalEVm016881t3
cluster894	3	Q9P4E9	GO:0015031; P:protein transport; IEA:UniProtKB-KW	Arachis_valida|AravalEVm037391t1;Arachis_valida|AravalEVm037391t3;Arachis_stenosperma|ArasteEVm024533t1
cluster895	3	N/A	N/A	Arachis_valida|AravalEVm013550t2;Arachis_valida|AravalEVm013550t3;Arachis_stenosperma|ArasteEVm010664t2
cluster896	3	N/A	N/A	Arachis_valida|AravalEVm029954t1;Arachis_valida|AravalEVm039411t1;Arachis_valida|AravalEVm041101t1
cluster897	3	F4HWL3	GO:0005802; C:trans-Golgi network; IDA:TAIR	Arachis_valida|AravalEVm005784t6;Arachis_valida|AravalEVm005784t4;Arachis_valida|AravalEVm005784t5
cluster898	3	O49545	GO:0010075; P:regulation of meristem growth; IGI:TAIR	Arachis_valida|AravalEVm001231t1;Arachis_valida|AravalEVm000993t1;Arachis_valida|AravalEVm001259t1
cluster899	3	Q09751	GO:0019243; P:methylglyoxal catabolic process to D-lactate via S-lactoyl-glutathione; IMP:PomBase	Arachis_valida|AravalEVm024026t1;Arachis_valida|AravalEVm019421t2;Arachis_valida|AravalEVm054038t1
cluster900	3	Q65XK7	GO:0010030; P:positive regulation of seed germination; IMP:UniProtKB	Arachis_valida|AravalEVm013835t2;Arachis_valida|AravalEVm013835t3;Arachis_stenosperma|ArasteEVm012155t2
cluster901	3	N/A	N/A	Arachis_valida|AravalEVm039703t1;Arachis_valida|AravalEVm026452t2;Arachis_hypogaea_SunOleic_97R|ArahypEVm023959t1
cluster902	3	N/A	N/A	Arachis_valida|AravalEVm026148t1;Arachis_valida|AravalEVm019708t1;Arachis_valida|AravalEVm022546t1
cluster903	3	Q39644	N/A	Arachis_valida|AravalEVm084505t2;Arachis_valida|AravalEVm084505t1;Arachis_valida|AravalEVm084505t3
cluster904	3	P78811	GO:0006011; P:UDP-glucose metabolic process; IMP:PomBase	Arachis_valida|AravalEVm033415t1;Arachis_valida|AravalEVm009253t1;Arachis_valida|AravalEVm026555t5
cluster905	3	Q04432	GO:0019243; P:methylglyoxal catabolic process to D-lactate via S-lactoyl-glutathione; IDA:SGD	Arachis_valida|AravalEVm034430t1;Arachis_valida|AravalEVm033603t1;Arachis_valida|AravalEVm034075t1
cluster906	3	C7J0A2	GO:0006265; P:DNA topological change; IBA:GO_Central	Arachis_valida|AravalEVm004814t5;Arachis_valida|AravalEVm002301t3;Arachis_valida|AravalEVm004814t2
cluster907	3	P38219	GO:0043022; F:ribosome binding; IEA:UniProtKB-UniRule	Arachis_valida|AravalEVm010462t3;Arachis_valida|AravalEVm010462t4;Arachis_valida|AravalEVm010462t5
cluster908	3	N/A	N/A	Arachis_valida|AravalEVm000615t1;Arachis_valida|AravalEVm000615t2;Arachis_valida|AravalEVm003381t1
cluster909	3	N/A	N/A	Arachis_valida|AravalEVm017957t1;Arachis_valida|AravalEVm006391t1;Arachis_valida|AravalEVm032247t1
cluster910	3	P30657	GO:0043161; P:proteasome-mediated ubiquitin-dependent protein catabolic process; IDA:SGD	Arachis_valida|AravalEVm030093t1;Arachis_valida|AravalEVm030212t1;Arachis_stenosperma|ArasteEVm019954t1
cluster911	3	O43242	GO:0006511; P:ubiquitin-dependent protein catabolic process; IBA:GO_Central	Arachis_valida|AravalEVm005402t1;Arachis_valida|AravalEVm005402t2;Arachis_valida|AravalEVm007412t1
cluster912	3	O14470	GO:0006357; P:regulation of transcription by RNA polymerase II; IPI:PomBase	Arachis_valida|AravalEVm004808t1;Arachis_valida|AravalEVm015539t1;Arachis_stenosperma|ArasteEVm000908t1
cluster913	3	N/A	N/A	Arachis_valida|AravalEVm059282t1;Arachis_valida|AravalEVm059282t3;Arachis_valida|AravalEVm068589t8
cluster914	3	Q7RXY1	GO:0006412; P:translation; IEA:InterPro	Arachis_valida|AravalEVm062210t1;Arachis_valida|AravalEVm062178t1;Arachis_stenosperma|ArasteEVm041218t1
cluster915	3	Q9FT74	GO:0000724; P:double-strand break repair via homologous recombination; IBA:GO_Central	Arachis_valida|AravalEVm006012t2;Arachis_valida|AravalEVm006012t3;Arachis_stenosperma|ArasteEVm001569t4
cluster916	3	Q9SAV3	GO:0007584; P:response to nutrient; IBA:GO_Central	Arachis_valida|AravalEVm019086t2;Arachis_valida|AravalEVm017034t2;Arachis_valida|AravalEVm019007t1
cluster917	3	Q501H5	GO:0015031; P:protein transport; IEA:UniProtKB-KW	Arachis_valida|AravalEVm022540t1;Arachis_valida|AravalEVm022540t4;Arachis_valida|AravalEVm025874t4
cluster918	3	Q5B998	GO:0009088; P:threonine biosynthetic process; IEA:UniProtKB-UniPathway	Arachis_valida|AravalEVm025465t1;Arachis_valida|AravalEVm017891t2;Arachis_valida|AravalEVm018390t1
cluster919	3	P78814	GO:0045292; P:mRNA cis splicing, via spliceosome; ISO:PomBase	Arachis_valida|AravalEVm025307t1;Arachis_valida|AravalEVm028694t2;Arachis_hypogaea_SunOleic_97R|ArahypEVm026777t3
cluster920	3	O94512	GO:0006629; P:lipid metabolic process; NAS:PomBase	Arachis_valida|AravalEVm018867t2;Arachis_valida|AravalEVm009196t1;Arachis_valida|AravalEVm013717t1
cluster921	3	N/A	N/A	Arachis_valida|AravalEVm021456t1;Arachis_valida|AravalEVm021456t3;Arachis_valida|AravalEVm043631t1
cluster922	3	P14318	GO:1901739; P:regulation of myoblast fusion; IMP:FlyBase	Arachis_valida|AravalEVm044337t1;Arachis_valida|AravalEVm044326t1;Arachis_valida|AravalEVm047951t1
cluster923	3	Q9LUM1	N/A	Arachis_valida|AravalEVm039379t2;Arachis_valida|AravalEVm034748t1;Arachis_valida|AravalEVm034748t3
cluster924	3	Q8X132	GO:0006281; P:DNA repair; IEA:UniProtKB-KW	Arachis_valida|AravalEVm060871t2;Arachis_valida|AravalEVm061270t1;Arachis_stenosperma|ArasteEVm039310t1
cluster925	3	Q7S986	GO:0006096; P:glycolytic process; IBA:GO_Central	Arachis_valida|AravalEVm008162t1;Arachis_valida|AravalEVm008025t1;Arachis_valida|AravalEVm009044t1
cluster926	3	P54814	GO:0030163; P:protein catabolic process; IEA:InterPro	Arachis_valida|AravalEVm016873t1;Arachis_valida|AravalEVm016892t2;Arachis_stenosperma|ArasteEVm010904t1
cluster927	3	Q24400	GO:0045214; P:sarcomere organization; IGI:FlyBase	Arachis_valida|AravalEVm010456t1;Arachis_valida|AravalEVm002483t3;Arachis_valida|AravalEVm002483t8
cluster928	3	Q09173	GO:1900034; P:regulation of cellular response to heat; IMP:PomBase	Arachis_valida|AravalEVm013910t1;Arachis_valida|AravalEVm013910t2;Arachis_stenosperma|ArasteEVm012764t1
cluster929	3	F4I2H7	GO:0051225; P:spindle assembly; IMP:TAIR	Arachis_valida|AravalEVm009459t3;Arachis_valida|AravalEVm009459t2;Arachis_stenosperma|ArasteEVm007786t1
cluster930	3	Q8W1Y3	GO:0009845; P:seed germination; IMP:UniProtKB	Arachis_valida|AravalEVm010527t1;Arachis_valida|AravalEVm000361t1;Arachis_hypogaea_SunOleic_97R|ArahypEVm003915t1
cluster931	3	P0CH08	GO:0042254; P:ribosome biogenesis; IDA:SGD	Arachis_valida|AravalEVm058182t1;Arachis_valida|AravalEVm066610t1;Arachis_stenosperma|ArasteEVm046181t1
cluster932	3	Q9W1C9	GO:0009615; P:response to virus; IEP:FlyBase	Arachis_valida|AravalEVm060789t1;Arachis_valida|AravalEVm063200t1;Arachis_valida|AravalEVm066160t1
cluster933	3	P0CT30	GO:0030433; P:ubiquitin-dependent ERAD pathway; IBA:GO_Central	Arachis_valida|AravalEVm020178t1;Arachis_valida|AravalEVm019221t1;Arachis_valida|AravalEVm019624t1
cluster934	3	O43029	GO:0019477; P:L-lysine catabolic process; TAS:PomBase	Arachis_valida|AravalEVm013626t1;Arachis_valida|AravalEVm013682t1;Arachis_valida|AravalEVm031185t1
cluster935	3	P23231	GO:0006886; P:intracellular protein transport; IEA:InterPro	Arachis_valida|AravalEVm005918t2;Arachis_valida|AravalEVm008648t1;Arachis_stenosperma|ArasteEVm005133t2
cluster936	3	Q5AQL1	GO:0006400; P:tRNA modification; IBA:GO_Central	Arachis_valida|AravalEVm010272t1;Arachis_valida|AravalEVm001343t2;Arachis_stenosperma|ArasteEVm001093t5
cluster937	3	Q43077	GO:0055114; P:oxidation-reduction process; IDA:UniProtKB	Arachis_valida|AravalEVm004740t1;Arachis_valida|AravalEVm004740t2;Arachis_hypogaea_SunOleic_97R|ArahypEVm002291t1
cluster938	3	N/A	N/A	Arachis_valida|AravalEVm001166t2;Arachis_valida|AravalEVm001166t7;Arachis_stenosperma|ArasteEVm001430t3
cluster939	3	P11913	GO:0006627; P:protein processing involved in protein targeting to mitochondrion; IEA:InterPro	Arachis_valida|AravalEVm012622t1;Arachis_valida|AravalEVm011551t1;Arachis_stenosperma|ArasteEVm013597t1
cluster940	3	N/A	N/A	Arachis_valida|AravalEVm012469t4;Arachis_valida|AravalEVm012469t1;Arachis_valida|AravalEVm012469t3
cluster941	3	Q9FZ47	GO:0009744; P:response to sucrose; IEP:TAIR	Arachis_valida|AravalEVm027219t4;Arachis_valida|AravalEVm027219t1;Arachis_valida|AravalEVm027219t2
cluster942	3	Q9UT44	GO:0006561; P:proline biosynthetic process; EXP:PomBase	Arachis_valida|AravalEVm013252t1;Arachis_valida|AravalEVm003372t1;Arachis_hypogaea_SunOleic_97R|ArahypEVm008608t3
cluster943	3	P34528	GO:0006508; P:proteolysis; IBA:GO_Central	Arachis_valida|AravalEVm012091t1;Arachis_valida|AravalEVm008917t1;Arachis_valida|AravalEVm009000t1
cluster944	3	Q3UHK1	GO:0005366; F:myo-inositol:proton symporter activity; IBA:GO_Central	Arachis_valida|AravalEVm007220t1;Arachis_valida|AravalEVm006299t1;Arachis_valida|AravalEVm007220t2
cluster945	3	Q7RVI1	GO:0006412; P:translation; IBA:GO_Central	Arachis_valida|AravalEVm037408t2;Arachis_valida|AravalEVm023813t6;Arachis_stenosperma|ArasteEVm020400t3
cluster946	3	P26262	GO:0051919; P:positive regulation of fibrinolysis; ISO:MGI	Arachis_valida|AravalEVm024911t6;Arachis_valida|AravalEVm024911t7;Valsten1|AravsEVm013802t3
cluster947	3	Q9SN23	N/A	Arachis_valida|AravalEVm033009t1;Arachis_valida|AravalEVm033009t2;Arachis_hypogaea_SunOleic_97R|ArahypEVm020095t3
cluster948	3	Q7G9P4	GO:0009851; P:auxin biosynthetic process; IEA:UniProtKB-KW	Arachis_valida|AravalEVm000384t2;Arachis_valida|AravalEVm000384t3;Valsten1|AravsEVm000263t6
cluster949	3	Q7S8R8	GO:0042176; P:regulation of protein catabolic process; IEA:InterPro	Arachis_valida|AravalEVm001977t1;Arachis_valida|AravalEVm001926t1;Arachis_stenosperma|ArasteEVm001526t5
cluster950	3	N/A	N/A	Arachis_valida|AravalEVm001503t3;Arachis_valida|AravalEVm001503t1;Arachis_valida|AravalEVm001503t2
cluster951	3	P22465	GO:0005544; F:calcium-dependent phospholipid binding; IDA:FlyBase	Arachis_valida|AravalEVm023278t3;Arachis_valida|AravalEVm011777t1;Arachis_valida|AravalEVm020872t2
cluster952	3	P92980	GO:0019419; P:sulfate reduction; IEA:InterPro	Arachis_valida|AravalEVm024917t2;Arachis_valida|AravalEVm024917t3;Arachis_valida|AravalEVm024917t4
cluster953	3	O13657	GO:0010045; P:response to nickel cation; ISS:PomBase	Arachis_valida|AravalEVm005123t1;Arachis_valida|AravalEVm002463t1;Arachis_valida|AravalEVm018246t1
cluster954	3	C0LGE0	GO:0046777; P:protein autophosphorylation; IBA:GO_Central	Arachis_valida|AravalEVm006239t11;Arachis_valida|AravalEVm006239t12;Arachis_stenosperma|ArasteEVm000898t7
cluster955	3	P50085	GO:0001302; P:replicative cell aging; IMP:SGD	Arachis_valida|AravalEVm024471t1;Arachis_valida|AravalEVm024681t1;Arachis_valida|AravalEVm027799t1
cluster956	3	P62998	GO:0071526; P:semaphorin-plexin signaling pathway; ISS:UniProtKB	Arachis_valida|AravalEVm040515t1;Arachis_valida|AravalEVm041985t1;Arachis_stenosperma|ArasteEVm002533t2
cluster957	3	N/A	N/A	Arachis_valida|AravalEVm001841t4;Arachis_valida|AravalEVm001841t3;Arachis_stenosperma|ArasteEVm003975t2
cluster958	3	O81832	GO:0048544; P:recognition of pollen; IEA:InterPro	Arachis_valida|AravalEVm004199t2;Arachis_valida|AravalEVm004199t1;Valsten1|AravsEVm008352t6
cluster959	3	N/A	N/A	Arachis_valida|AravalEVm037969t1;Arachis_valida|AravalEVm037969t4;Arachis_valida|AravalEVm037969t5
cluster960	3	P87262	GO:0042254; P:ribosome biogenesis; IDA:SGD	Arachis_valida|AravalEVm070506t5;Arachis_valida|AravalEVm070491t2;Arachis_valida|AravalEVm070506t1
cluster961	3	Q7M4F3	GO:0042302; F:structural constituent of cuticle; IEA:UniProtKB-KW	Arachis_valida|AravalEVm019344t2;Arachis_valida|AravalEVm019344t1;Valsten1|AravsEVm012224t1
cluster962	3	N/A	N/A	Arachis_valida|AravalEVm083382t1;Arachis_valida|AravalEVm083382t2;Valsten1|AravsEVm057417t1
cluster963	3	Q04980	GO:0009414; P:response to water deprivation; IEP:TAIR	Arachis_valida|AravalEVm004414t2;Arachis_valida|AravalEVm004414t1;Valsten1|AravsEVm002935t4
cluster964	3	P24590	GO:0006096; P:glycolytic process; IEA:UniProtKB-UniPathway	Arachis_valida|AravalEVm011449t2;Arachis_valida|AravalEVm011449t6;Arachis_valida|AravalEVm014942t2
cluster965	3	Q9UTM4	GO:0006457; P:protein folding; ISO:PomBase	Arachis_valida|AravalEVm007662t4;Arachis_valida|AravalEVm008151t1;Arachis_stenosperma|ArasteEVm006011t1
cluster966	3	O81832	GO:0048544; P:recognition of pollen; IEA:InterPro	Arachis_valida|AravalEVm002258t1;Arachis_valida|AravalEVm002258t2;Valsten1|AravsEVm002239t1
cluster967	3	P50167	GO:0005975; P:carbohydrate metabolic process; ISS:UniProtKB	Arachis_valida|AravalEVm020765t2;Arachis_valida|AravalEVm026055t1;Valsten1|AravsEVm030881t1
cluster968	3	P08092	GO:0007165; P:signal transduction; NAS:PomBase	Arachis_valida|AravalEVm015733t2;Arachis_valida|AravalEVm015733t1;Arachis_valida|AravalEVm005367t1
cluster969	3	P87256	GO:0009098; P:leucine biosynthetic process; IEA:UniProtKB-UniPathway	Arachis_valida|AravalEVm018742t1;Arachis_valida|AravalEVm018957t1;Valsten1|AravsEVm010563t2
cluster970	3	P36621	GO:0045761; P:regulation of adenylate cyclase activity; IGI:PomBase	Arachis_valida|AravalEVm009004t1;Arachis_valida|AravalEVm008085t3;Arachis_stenosperma|ArasteEVm008182t1
cluster971	3	Q6Q487	GO:0006457; P:protein folding; IMP:AspGD	Arachis_valida|AravalEVm007602t3;Arachis_valida|AravalEVm007727t1;Arachis_stenosperma|ArasteEVm004808t1
cluster972	3	Q3SYP2	GO:0006508; P:proteolysis; ISO:MGI	Arachis_valida|AravalEVm027519t1;Arachis_valida|AravalEVm028536t1;Arachis_valida|AravalEVm029520t1
cluster973	3	O94524	GO:0098869; P:cellular oxidant detoxification; IC:PomBase	Arachis_valida|AravalEVm016490t1;Arachis_valida|AravalEVm017394t1;Arachis_stenosperma|ArasteEVm013573t5
cluster974	3	P45583	GO:0042302; F:structural constituent of cuticle; IEA:UniProtKB-KW	Arachis_valida|AravalEVm052634t1;Arachis_valida|AravalEVm052634t2;Valsten1|AravsEVm010013t1
cluster975	3	P87025	GO:0042438; P:melanin biosynthetic process; IEA:UniProtKB-UniPathway	Arachis_valida|AravalEVm026608t1;Arachis_valida|AravalEVm027507t2;Arachis_valida|AravalEVm027507t5
cluster976	3	Q8VYJ1	GO:0042372; P:phylloquinone biosynthetic process; IMP:TAIR	Arachis_valida|AravalEVm007529t4;Arachis_valida|AravalEVm007529t2;Arachis_stenosperma|ArasteEVm005362t4
cluster977	3	O23661	GO:0010050; P:vegetative phase change; IMP:TAIR	Arachis_valida|AravalEVm004146t2;Arachis_valida|AravalEVm004095t1;Arachis_stenosperma|ArasteEVm022260t2
cluster978	3	E9RBG1	GO:0055085; P:transmembrane transport; IBA:GO_Central	Arachis_valida|AravalEVm002461t1;Arachis_valida|AravalEVm009203t1;Arachis_valida|AravalEVm016172t1
cluster979	3	P49598	GO:0009414; P:response to water deprivation; IEP:TAIR	Arachis_valida|AravalEVm013983t1;Valsten1|AravsEVm009447t1;Arachis_stenosperma|ArasteEVm003855t4
cluster980	3	N/A	N/A	Arachis_valida|AravalEVm016046t1;Arachis_hypogaea_Tifguard|ArahypEVm007554t1;Arachis_stenosperma|ArasteEVm030982t1
cluster981	3	Q9M0I2	GO:0006949; P:syncytium formation; IEP:TAIR	Arachis_valida|AravalEVm029861t1;Arachis_stenosperma|ArasteEVm019492t1;Arachis_hypogaea_SunOleic_97R|ArahypEVm015369t1
cluster982	3	Q9STI6	GO:0005975; P:carbohydrate metabolic process; IEA:UniProtKB-KW	Arachis_valida|AravalEVm013366t2;Valsten1|AravsEVm008863t1;Arachis_hypogaea_SunOleic_97R|ArahypEVm007190t1
cluster983	3	Q9FPT1	GO:0006511; P:ubiquitin-dependent protein catabolic process; IEA:InterPro	Arachis_valida|AravalEVm016312t1;Arachis_hypogaea_Tifguard|ArahypEVm008806t1;Arachis_hypogaea_SunOleic_97R|ArahypEVm008806t1
cluster984	3	F4JAA5	GO:0006401; P:RNA catabolic process; IBA:GO_Central	Arachis_valida|AravalEVm000410t8;Arachis_stenosperma|ArasteEVm001054t2;Arachis_stenosperma|ArasteEVm001066t2
cluster985	3	P25443	GO:0006412; P:translation; IEA:InterPro	Arachis_valida|AravalEVm027596t2;Valsten1|AravsEVm020559t5;Arachis_stenosperma|ArasteEVm020124t6
cluster986	3	Q09924	GO:0002183; P:cytoplasmic translational initiation; IDA:PomBase	Arachis_valida|AravalEVm017935t1;Arachis_stenosperma|ArasteEVm004430t2;Arachis_hypogaea_SunOleic_97R|ArahypEVm012983t3
cluster987	3	Q9C5S2	GO:0008380; P:RNA splicing; IMP:UniProtKB	Arachis_valida|AravalEVm001887t1;Valsten1|AravsEVm001423t3;Arachis_hypogaea_SunOleic_97R|ArahypEVm000853t3
cluster988	3	Q1PF16	GO:0006355; P:regulation of transcription, DNA-templated; TAS:TAIR	Arachis_valida|AravalEVm021911t2;Arachis_stenosperma|ArasteEVm015232t5;Arachis_hypogaea_SunOleic_97R|ArahypEVm012396t1
cluster989	3	Q9CAL3	GO:0010193; P:response to ozone; IEP:TAIR	Arachis_valida|AravalEVm005176t1;Valsten1|AravsEVm003378t2;Arachis_stenosperma|ArasteEVm003650t2
cluster990	3	Q9CAL3	GO:0010193; P:response to ozone; IEP:TAIR	Arachis_hypogaea_Tifguard|ArahypEVm004018t9;Arachis_stenosperma|ArasteEVm003331t7;Arachis_hypogaea_SunOleic_97R|ArahypEVm004018t9
cluster991	3	N/A	N/A	Arachis_valida|AravalEVm053750t1;Arachis_hypogaea_Tifguard|ArahypEVm007925t1;Arachis_hypogaea_SunOleic_97R|ArahypEVm007925t1
cluster992	3	Q9SVY1	GO:0010500; P:transmitting tissue development; IMP:TAIR	Arachis_valida|AravalEVm031489t2;Arachis_hypogaea_SunOleic_97R|ArahypEVm010280t1;Arachis_hypogaea_SunOleic_97R|ArahypEVm010484t1
cluster993	3	F4HW02	GO:0015812; P:gamma-aminobutyric acid transport; IGI:TAIR	Arachis_valida|AravalEVm012004t3;Arachis_hypogaea_Tifguard|ArahypEVm005032t5;Arachis_hypogaea_SunOleic_97R|ArahypEVm005032t5
cluster994	3	Q96558	GO:0006065; P:UDP-glucuronate biosynthetic process; IEA:UniProtKB-UniPathway	Arachis_valida|AravalEVm006122t1;Valsten1|AravsEVm007381t1;Arachis_hypogaea_SunOleic_97R|ArahypEVm005822t2
cluster995	3	Q9SSQ8	GO:0042542; P:response to hydrogen peroxide; IEP:TAIR	Arachis_valida|AravalEVm035706t1;Arachis_hypogaea_Tifguard|ArahypEVm017206t1;Arachis_stenosperma|ArasteEVm024058t1
cluster996	3	N/A	N/A	Arachis_valida|AravalEVm006850t1;Arachis_hypogaea_Tifguard|ArahypEVm003379t3;Arachis_hypogaea_SunOleic_97R|ArahypEVm003379t3
cluster997	3	Q39846	N/A	Arachis_valida|AravalEVm009627t1;Valsten1|AravsEVm006621t1;Arachis_hypogaea_SunOleic_97R|ArahypEVm015335t1
cluster998	3	P25655	GO:0006368; P:transcription elongation from RNA polymerase II promoter; IMP:SGD	Arachis_valida|AravalEVm002312t2;Arachis_stenosperma|ArasteEVm000036t4;Arachis_stenosperma|ArasteEVm000497t1
cluster999	3	A7PQW3	GO:0009607; P:response to biotic stimulus; IEA:UniProtKB-KW	Arachis_valida|AravalEVm028033t1;Arachis_hypogaea_Tifguard|ArahypEVm011866t1;Arachis_hypogaea_SunOleic_97R|ArahypEVm011866t1
cluster1000	3	Q9SP32	GO:0016075; P:rRNA catabolic process; IEA:InterPro	Arachis_valida|AravalEVm000378t3;Arachis_hypogaea_Tifguard|ArahypEVm000104t5;Arachis_stenosperma|ArasteEVm000083t3
cluster1001	3	Q3EBC8	GO:0051214; P:RNA virus induced gene silencing; IGI:TAIR	Arachis_hypogaea_SunOleic_97R|ArahypEVm000104t3;Arachis_hypogaea_Tifguard|ArahypEVm000104t3;Arachis_stenosperma|ArasteEVm000309t4
cluster1002	3	P0CX39	GO:0000462; P:maturation of SSU-rRNA from tricistronic rRNA transcript (SSU-rRNA, 58S rRNA, LSU-rRNA); IGI:SGD	Arachis_valida|AravalEVm038212t1;Arachis_stenosperma|ArasteEVm025121t1;Arachis_hypogaea_SunOleic_97R|ArahypEVm018691t2
cluster1003	3	Q1PFD1	GO:0003700; F:DNA-binding transcription factor activity; ISS:TAIR	Arachis_valida|AravalEVm012972t1;Arachis_hypogaea_Tifguard|ArahypEVm002145t4;Arachis_stenosperma|ArasteEVm005534t1
cluster1004	3	P22196	GO:0006979; P:response to oxidative stress; IEA:InterPro	Arachis_valida|AravalEVm022116t2;Arachis_hypogaea_Tifguard|ArahypEVm011964t1;Arachis_hypogaea_SunOleic_97R|ArahypEVm011964t6
cluster1005	3	N/A	N/A	Arachis_valida|AravalEVm023669t3;Arachis_hypogaea_Tifguard|ArahypEVm015060t4;Arachis_hypogaea_SunOleic_97R|ArahypEVm015060t4
cluster1006	3	N/A	N/A	Arachis_valida|AravalEVm043562t1;Valsten1|AravsEVm030297t1;Arachis_stenosperma|ArasteEVm028444t1
cluster1007	3	N/A	N/A	Arachis_valida|AravalEVm006370t2;Arachis_stenosperma|ArasteEVm005853t6;Arachis_hypogaea_SunOleic_97R|ArahypEVm003945t2
cluster1008	3	O81862	GO:0009651; P:response to salt stress; IEP:TAIR	Arachis_valida|AravalEVm017422t2;Arachis_hypogaea_Tifguard|ArahypEVm009453t1;Arachis_hypogaea_SunOleic_97R|ArahypEVm009453t3
cluster1009	3	Q40392	GO:0007165; P:signal transduction; IEA:InterPro	Arachis_valida|AravalEVm000723t3;Arachis_hypogaea_Tifguard|ArahypEVm000764t3;Arachis_hypogaea_SunOleic_97R|ArahypEVm000432t5
cluster1010	3	Q941L3	GO:0009266; P:response to temperature stimulus; IEP:TAIR	Arachis_valida|AravalEVm007122t9;Arachis_stenosperma|ArasteEVm010889t6;Arachis_stenosperma|ArasteEVm010889t8
cluster1011	3	Q2TA14	GO:0043535; P:regulation of blood vessel endothelial cell migration; IMP:MGI	Arachis_valida|AravalEVm008895t1;Valsten1|AravsEVm007188t2;Arachis_hypogaea_Tifguard|ArahypEVm005661t1
cluster1012	3	Q7XJJ7	GO:0070291; P:N-acylethanolamine metabolic process; IMP:TAIR	Arachis_valida|AravalEVm006375t1;Valsten1|AravsEVm004274t2;Arachis_stenosperma|ArasteEVm004546t4
cluster1013	3	A1XQX8	GO:0007155; P:cell adhesion; IEA:UniProtKB-KW	Arachis_valida|AravalEVm010005t1;Arachis_stenosperma|ArasteEVm001143t1;Arachis_stenosperma|ArasteEVm000017t3
cluster1014	3	N/A	N/A	Arachis_valida|AravalEVm032738t1;Arachis_stenosperma|ArasteEVm025005t2;Arachis_hypogaea_SunOleic_97R|ArahypEVm033160t1
cluster1015	3	P93295	GO:0005739; C:mitochondrion; IEA:UniProtKB-SubCell	Arachis_valida|AravalEVm051928t1;Valsten1|AravsEVm028176t2;Arachis_stenosperma|ArasteEVm027000t1
cluster1016	3	O01639	GO:0008270; F:zinc ion binding; IEA:InterPro	Arachis_valida|AravalEVm001864t3;Arachis_stenosperma|ArasteEVm001330t4;Arachis_stenosperma|ArasteEVm001330t2
cluster1017	3	B6ETT4	GO:0009306; P:protein secretion; IMP:TAIR	Arachis_valida|AravalEVm008565t5;Valsten1|AravsEVm005798t2;Arachis_hypogaea_SunOleic_97R|ArahypEVm007395t2
cluster1018	3	Q9FN30	GO:0010189; P:vitamin E biosynthetic process; IMP:TAIR	Arachis_valida|AravalEVm013718t2;Valsten1|AravsEVm010117t3;Arachis_hypogaea_Tifguard|ArahypEVm008075t12
cluster1019	3	F2Z699	GO:0016491; F:oxidoreductase activity; IEA:UniProtKB-KW	Arachis_valida|AravalEVm007036t1;Arachis_hypogaea_Tifguard|ArahypEVm003678t2;Arachis_hypogaea_SunOleic_97R|ArahypEVm003678t2
cluster1020	3	C6SVQ5	GO:0051539; F:4 iron, 4 sulfur cluster binding; IBA:GO_Central	Arachis_valida|AravalEVm042223t1;Arachis_hypogaea_Tifguard|ArahypEVm020792t2;Arachis_stenosperma|ArasteEVm057068t1
cluster1021	3	N/A	N/A	Arachis_valida|AravalEVm007990t1;Arachis_hypogaea_Tifguard|ArahypEVm004060t1;Arachis_hypogaea_SunOleic_97R|ArahypEVm004060t1
cluster1022	3	N/A	N/A	Arachis_valida|AravalEVm024615t1;Arachis_hypogaea_Tifguard|ArahypEVm013220t1;Arachis_hypogaea_SunOleic_97R|ArahypEVm013220t1
cluster1023	3	Q84TH6	GO:0048046; C:apoplast; IEA:UniProtKB-SubCell	Arachis_valida|AravalEVm043565t1;Valsten1|AravsEVm029344t4;Arachis_hypogaea_SunOleic_97R|ArahypEVm021524t2
cluster1024	3	Q09717	GO:0006405; P:RNA export from nucleus; ISO:PomBase	Arachis_valida|AravalEVm031507t2;Arachis_stenosperma|ArasteEVm006498t1;Arachis_stenosperma|ArasteEVm001240t1
cluster1025	3	Q5JJY4	GO:0004674; F:protein serine/threonine kinase activity; IEA:UniProtKB-KW	Arachis_valida|AravalEVm009126t10;Arachis_stenosperma|ArasteEVm006401t2;Arachis_stenosperma|ArasteEVm006401t6
cluster1026	3	B6HFE0	GO:0006412; P:translation; IEA:UniProtKB-UniRule	Arachis_valida|AravalEVm030791t2;Valsten1|AravsEVm020803t3;Arachis_stenosperma|ArasteEVm020477t1
cluster1027	3	Q9LF37	GO:0009408; P:response to heat; IEP:TAIR	Arachis_valida|AravalEVm006020t1;Arachis_hypogaea_Tifguard|ArahypEVm002806t1;Arachis_hypogaea_SunOleic_97R|ArahypEVm002806t1
cluster1028	3	P05477	GO:0009651; P:response to salt stress; IBA:GO_Central	Arachis_valida|AravalEVm037404t1;Valsten1|AravsEVm025957t2;Arachis_stenosperma|ArasteEVm033839t1
cluster1029	3	Q9P7Q7	GO:0000160; P:phosphorelay signal transduction system; IMP:PomBase	Arachis_valida|AravalEVm003768t1;Arachis_stenosperma|ArasteEVm003543t6;Arachis_hypogaea_SunOleic_97R|ArahypEVm000737t7
cluster1030	3	N/A	N/A	Arachis_valida|AravalEVm005874t2;Valsten1|AravsEVm011833t2;Arachis_hypogaea_SunOleic_97R|ArahypEVm007576t2
cluster1031	3	Q9ZPC0	GO:0006952; P:defense response; IEA:UniProtKB-KW	Arachis_valida|AravalEVm025643t7;Arachis_hypogaea_Tifguard|ArahypEVm006148t3;Arachis_hypogaea_SunOleic_97R|ArahypEVm005739t11
cluster1032	3	Q9SAG8	GO:0009416; P:response to light stimulus; IEP:TAIR	Arachis_valida|AravalEVm053016t3;Valsten1|AravsEVm051817t2;Arachis_stenosperma|ArasteEVm035074t2
cluster1033	3	Q6NPR6	GO:0008017; F:microtubule binding; IBA:GO_Central	Arachis_valida|AravalEVm005656t1;Valsten1|AravsEVm003273t4;Arachis_stenosperma|ArasteEVm003512t2
cluster1034	3	Q93ZR8	GO:0006486; P:protein glycosylation; IEA:UniProtKB-UniPathway	Arachis_valida|AravalEVm009067t1;Valsten1|AravsEVm006104t1;Arachis_hypogaea_SunOleic_97R|ArahypEVm004724t1
cluster1035	3	Q2UKG6	GO:0001732; P:formation of cytoplasmic translation initiation complex; IEA:UniProtKB-UniRule	Arachis_valida|AravalEVm015798t2;Valsten1|AravsEVm001054t5;Valsten1|AravsEVm001054t3
cluster1036	3	P20825	GO:0015074; P:DNA integration; IEA:InterPro	Arachis_valida|AravalEVm032731t1;Valsten1|AravsEVm058494t1;Arachis_stenosperma|ArasteEVm008798t1
cluster1037	3	Q38898	GO:0009737; P:response to abscisic acid; IEP:TAIR	Arachis_valida|AravalEVm002598t2;Arachis_stenosperma|ArasteEVm001928t4;Arachis_hypogaea_SunOleic_97R|ArahypEVm006087t3
cluster1038	3	Q38849	GO:0010118; P:stomatal movement; IMP:TAIR	Arachis_hypogaea_Tifguard|ArahypEVm001683t15;Arachis_stenosperma|ArasteEVm001504t2;Arachis_hypogaea_SunOleic_97R|ArahypEVm001683t6
cluster1039	3	N/A	N/A	Arachis_valida|AravalEVm007948t1;Arachis_hypogaea_Tifguard|ArahypEVm004086t1;Arachis_hypogaea_SunOleic_97R|ArahypEVm004086t1
cluster1040	3	Q00IB6	GO:0009651; P:response to salt stress; IEP:UniProtKB	Arachis_valida|AravalEVm013514t7;Arachis_stenosperma|ArasteEVm000428t5;Arachis_stenosperma|ArasteEVm000428t3
cluster1041	3	Q9S9M5	GO:0007166; P:cell surface receptor signaling pathway; IBA:GO_Central	Arachis_valida|AravalEVm003773t6;Arachis_hypogaea_Tifguard|ArahypEVm003613t1;Arachis_hypogaea_SunOleic_97R|ArahypEVm003613t1
cluster1042	3	Q9LZM1	GO:0007338; P:single fertilization; IEA:UniProtKB-KW	Arachis_valida|AravalEVm025199t4;Arachis_stenosperma|ArasteEVm008837t3;Arachis_hypogaea_SunOleic_97R|ArahypEVm006755t4
cluster1043	3	F4JIF4	GO:0051015; F:actin filament binding; IBA:GO_Central	Arachis_valida|AravalEVm000135t2;Arachis_stenosperma|ArasteEVm000140t2;Arachis_stenosperma|ArasteEVm000140t1
cluster1044	3	P93147	GO:0016705; F:oxidoreductase activity, acting on paired donors, with incorporation or reduction of molecular oxygen; IEA:InterPro	Arachis_valida|AravalEVm010332t1;Arachis_hypogaea_Tifguard|ArahypEVm005239t1;Arachis_hypogaea_SunOleic_97R|ArahypEVm005239t1
cluster1045	3	A0A1I9LN01	GO:0009845; P:seed germination; IEP:UniProtKB	Arachis_valida|AravalEVm007247t1;Arachis_hypogaea_SunOleic_97R|ArahypEVm003578t6;Arachis_hypogaea_SunOleic_97R|ArahypEVm003578t1
cluster1046	3	N/A	N/A	Arachis_valida|AravalEVm104285t1;Arachis_stenosperma|ArasteEVm058232t3;Arachis_stenosperma|ArasteEVm058232t2
cluster1047	3	N/A	N/A	Arachis_valida|AravalEVm037256t1;Arachis_hypogaea_Tifguard|ArahypEVm018512t3;Arachis_hypogaea_SunOleic_97R|ArahypEVm018512t3
cluster1048	3	Q9FNY0	GO:0051726; P:regulation of cell cycle; IBA:GO_Central	Arachis_valida|AravalEVm011815t3;Arachis_hypogaea_Tifguard|ArahypEVm006527t2;Arachis_hypogaea_SunOleic_97R|ArahypEVm007299t2
cluster1049	3	Q9FK44	GO:0003700; F:DNA-binding transcription factor activity; ISS:TAIR	Arachis_valida|AravalEVm027951t1;Arachis_hypogaea_Tifguard|ArahypEVm014852t2;Arachis_hypogaea_SunOleic_97R|ArahypEVm014852t2
cluster1050	3	Q9FLD7	GO:0009826; P:unidimensional cell growth; IDA:TAIR	Arachis_valida|AravalEVm013728t1;Valsten1|AravsEVm031637t1;Arachis_hypogaea_SunOleic_97R|ArahypEVm019705t2
cluster1051	3	Q14197	GO:0070126; P:mitochondrial translational termination; IDA:UniProtKB	Arachis_valida|AravalEVm032377t4;Valsten1|AravsEVm021989t4;Arachis_hypogaea_SunOleic_97R|ArahypEVm017148t2
cluster1052	3	Q94A34	GO:0015031; P:protein transport; IEA:UniProtKB-KW	Arachis_valida|AravalEVm007377t3;Valsten1|AravsEVm012811t2;Arachis_stenosperma|ArasteEVm004211t3
cluster1053	3	Q8GWW6	GO:0008270; F:zinc ion binding; IEA:InterPro	Arachis_valida|AravalEVm016399t1;Arachis_hypogaea_Tifguard|ArahypEVm009915t1;Arachis_hypogaea_Tifguard|ArahypEVm022392t1
cluster1054	3	Q2RBE3	GO:0006468; P:protein phosphorylation; IBA:GO_Central	Arachis_hypogaea_SunOleic_97R|ArahypEVm015545t3;Arachis_hypogaea_SunOleic_97R|ArahypEVm015545t2;Arachis_hypogaea_SunOleic_97R|ArahypEVm015545t4
cluster1055	3	N/A	N/A	Arachis_valida|AravalEVm081601t1;Arachis_hypogaea_Tifguard|ArahypEVm033799t1;Arachis_hypogaea_SunOleic_97R|ArahypEVm033799t1
cluster1056	3	P51792	GO:0097401; P:synaptic vesicle lumen acidification; IBA:GO_Central	Arachis_valida|AravalEVm002282t1;Arachis_stenosperma|ArasteEVm002250t2;Arachis_stenosperma|ArasteEVm005644t7
cluster1057	3	Q56WF8	GO:0051603; P:proteolysis involved in cellular protein catabolic process; IBA:GO_Central	Arachis_valida|AravalEVm021647t1;Arachis_hypogaea_SunOleic_97R|ArahypEVm004827t1;Arachis_hypogaea_SunOleic_97R|ArahypEVm005001t1
cluster1058	3	Q9SYK9	GO:0010016; P:shoot system morphogenesis; IMP:TAIR	Arachis_hypogaea_Tifguard|ArahypEVm007285t2;Arachis_hypogaea_SunOleic_97R|ArahypEVm011956t2;Arachis_hypogaea_SunOleic_97R|ArahypEVm011956t1
cluster1059	3	P32294	GO:0006355; P:regulation of transcription, DNA-templated; IEA:InterPro	Arachis_valida|AravalEVm038643t3;Valsten1|AravsEVm020375t4;Arachis_hypogaea_SunOleic_97R|ArahypEVm019542t3
cluster1060	3	P36100	GO:0001113; P:transcriptional open complex formation at RNA polymerase II promoter; IDA:SGD	Arachis_valida|AravalEVm011521t7;Arachis_stenosperma|ArasteEVm008310t3;Arachis_hypogaea_Tifguard|ArahypEVm006123t5
cluster1061	3	Q91348	GO:0006096; P:glycolytic process; TAS:Reactome	Arachis_valida|AravalEVm011649t1;Arachis_stenosperma|ArasteEVm002528t3;Arachis_hypogaea_SunOleic_97R|ArahypEVm010464t1
cluster1062	3	N/A	N/A	Arachis_valida|AravalEVm003619t4;Arachis_hypogaea_Tifguard|ArahypEVm003649t2;Arachis_hypogaea_SunOleic_97R|ArahypEVm003649t2
cluster1063	3	O80622	GO:0006949; P:syncytium formation; IEP:TAIR	Arachis_valida|AravalEVm033016t1;Valsten1|AravsEVm028196t1;Arachis_hypogaea_SunOleic_97R|ArahypEVm017005t1
cluster1064	3	Q9FIN7	GO:0006624; P:vacuolar protein processing; TAS:UniProtKB	Arachis_valida|AravalEVm000043t2;Arachis_stenosperma|ArasteEVm000039t3;Arachis_stenosperma|ArasteEVm000039t1
cluster1065	3	O81832	GO:0048544; P:recognition of pollen; IEA:InterPro	Arachis_valida|AravalEVm007326t1;Arachis_hypogaea_Tifguard|ArahypEVm001119t1;Arachis_hypogaea_SunOleic_97R|ArahypEVm001119t1
cluster1066	3	O48923	GO:0016709; F:oxidoreductase activity, acting on paired donors, with incorporation or reduction of molecular oxygen, NAD(P)H as one donor, and incorporation of one atom of oxygen; IBA:GO_Central	Arachis_valida|AravalEVm010013t4;Valsten1|AravsEVm010689t9;Arachis_hypogaea_SunOleic_97R|ArahypEVm005262t6
cluster1067	3	O23461	GO:0009702; F:L-arabinokinase activity; IMP:TAIR	Arachis_valida|AravalEVm001405t11;Arachis_stenosperma|ArasteEVm001068t5;Arachis_hypogaea_SunOleic_97R|ArahypEVm034287t1
cluster1068	3	Q9UVD6	GO:0005975; P:carbohydrate metabolic process; IEA:InterPro	Arachis_valida|AravalEVm005272t3;Arachis_stenosperma|ArasteEVm003909t7;Arachis_hypogaea_SunOleic_97R|ArahypEVm002580t9
cluster1069	3	P26205	GO:0005975; P:carbohydrate metabolic process; IEA:InterPro	Arachis_stenosperma|ArasteEVm006504t2;Arachis_hypogaea_Tifguard|ArahypEVm004693t4;Arachis_hypogaea_SunOleic_97R|ArahypEVm004693t4
cluster1070	3	Q9FQA3	GO:0006749; P:glutathione metabolic process; IBA:GO_Central	Arachis_valida|AravalEVm027225t4;Arachis_hypogaea_Tifguard|ArahypEVm016745t2;Arachis_hypogaea_SunOleic_97R|ArahypEVm016745t2
cluster1071	3	P87140	GO:0006890; P:retrograde vesicle-mediated transport, Golgi to ER; ISO:PomBase	Arachis_valida|AravalEVm005232t1;Valsten1|AravsEVm001373t7;Arachis_stenosperma|ArasteEVm003853t1
cluster1072	3	Q9FKW8	GO:0004792; F:thiosulfate sulfurtransferase activity; IDA:UniProtKB	Arachis_valida|AravalEVm054507t1;Arachis_hypogaea_Tifguard|ArahypEVm028236t1;Arachis_hypogaea_SunOleic_97R|ArahypEVm028236t1
cluster1073	3	Q53B75	GO:0009813; P:flavonoid biosynthetic process; IEA:UniProtKB-UniPathway	Arachis_valida|AravalEVm035724t1;Arachis_hypogaea_Tifguard|ArahypEVm020771t1;Arachis_hypogaea_SunOleic_97R|ArahypEVm020771t1
cluster1074	3	Q9XIK4	GO:0051391; P:tRNA acetylation; IEA:UniProtKB-UniRule	Arachis_valida|AravalEVm001184t3;Arachis_stenosperma|ArasteEVm000807t4;Arachis_stenosperma|ArasteEVm000807t7
cluster1075	3	Q9SIY8	GO:0046688; P:response to copper ion; IEP:TAIR	Arachis_valida|AravalEVm007601t1;Arachis_hypogaea_Tifguard|ArahypEVm003774t1;Arachis_hypogaea_SunOleic_97R|ArahypEVm003666t1
cluster1076	3	P18091	GO:0045214; P:sarcomere organization; IDA:FlyBase	Arachis_valida|AravalEVm001992t1;Arachis_stenosperma|ArasteEVm000044t3;Arachis_stenosperma|ArasteEVm000252t2
cluster1077	3	Q65XK7	GO:0010030; P:positive regulation of seed germination; IMP:UniProtKB	Arachis_valida|AravalEVm013835t1;Valsten1|AravsEVm011888t1;Arachis_stenosperma|ArasteEVm012155t1
cluster1078	3	F4HUK6	GO:0006631; P:fatty acid metabolic process; IEA:UniProtKB-KW	Arachis_valida|AravalEVm007849t1;Arachis_hypogaea_Tifguard|ArahypEVm004026t1;Arachis_hypogaea_SunOleic_97R|ArahypEVm004026t1
cluster1079	3	Q6F303	GO:0000160; P:phosphorelay signal transduction system; IBA:GO_Central	Arachis_valida|AravalEVm056376t1;Arachis_hypogaea_SunOleic_97R|ArahypEVm025360t3;Arachis_hypogaea_SunOleic_97R|ArahypEVm025360t1
cluster1080	3	Q9S9K4	GO:0006508; P:proteolysis; IBA:GO_Central	Arachis_valida|AravalEVm010822t2;Arachis_stenosperma|ArasteEVm007246t6;Arachis_hypogaea_SunOleic_97R|ArahypEVm008082t7
cluster1081	3	N/A	N/A	Arachis_valida|AravalEVm085617t1;Valsten1|AravsEVm029133t1;Arachis_stenosperma|ArasteEVm042004t2
cluster1082	3	Q8GYS4	GO:0003333; P:amino acid transmembrane transport; IBA:GO_Central	Arachis_hypogaea_Tifguard|ArahypEVm005134t14;Valsten1|AravsEVm005389t4;Arachis_hypogaea_SunOleic_97R|ArahypEVm005134t12
cluster1083	3	Q1MTP1	GO:0005634; C:nucleus; HDA:PomBase	Arachis_valida|AravalEVm008414t1;Arachis_stenosperma|ArasteEVm000979t2;Arachis_hypogaea_SunOleic_97R|ArahypEVm001879t4
cluster1084	3	P10978	GO:0015074; P:DNA integration; IEA:InterPro	Arachis_valida|AravalEVm024925t1;Arachis_hypogaea_SunOleic_97R|ArahypEVm012432t1;Arachis_hypogaea_Tifguard|ArahypEVm009133t1
cluster1085	3	Q9SRM5	GO:0016042; P:lipid catabolic process; IEA:UniProtKB-KW	Arachis_valida|AravalEVm037035t7;Arachis_hypogaea_SunOleic_97R|ArahypEVm016139t4;Arachis_hypogaea_SunOleic_97R|ArahypEVm016088t2
cluster1086	3	O48818	GO:0006949; P:syncytium formation; IEP:TAIR	Arachis_valida|AravalEVm030262t1;Arachis_hypogaea_SunOleic_97R|ArahypEVm015906t1;Arachis_hypogaea_SunOleic_97R|ArahypEVm015906t2
cluster1087	3	Q0CTN3	GO:0006915; P:apoptotic process; IEA:UniProtKB-KW	Arachis_valida|AravalEVm013652t1;Valsten1|AravsEVm012620t2;Arachis_stenosperma|ArasteEVm011007t5
cluster1088	3	N/A	N/A	Arachis_valida|AravalEVm034952t1;Arachis_stenosperma|ArasteEVm005840t2;Arachis_hypogaea_SunOleic_97R|ArahypEVm036869t1
cluster1089	3	Q9LQL2	GO:0010167; P:response to nitrate; IEP:TAIR	Arachis_valida|AravalEVm006500t5;Arachis_hypogaea_SunOleic_97R|ArahypEVm003308t2;Arachis_hypogaea_SunOleic_97R|ArahypEVm003308t1
cluster1090	3	Q8VWQ5	GO:0009867; P:jasmonic acid mediated signaling pathway; IGI:TAIR	Arachis_valida|AravalEVm047993t1;Arachis_hypogaea_Tifguard|ArahypEVm022943t1;Arachis_hypogaea_SunOleic_97R|ArahypEVm022943t1
cluster1091	3	Q8VWQ5	GO:0009867; P:jasmonic acid mediated signaling pathway; IGI:TAIR	Valsten1|AravsEVm033575t4;Arachis_hypogaea_Tifguard|ArahypEVm022943t4;Arachis_hypogaea_SunOleic_97R|ArahypEVm022943t4
cluster1092	3	O49432	GO:0010584; P:pollen exine formation; IMP:TAIR	Arachis_valida|AravalEVm010299t1;Valsten1|AravsEVm006891t8;Arachis_hypogaea_SunOleic_97R|ArahypEVm005436t1
cluster1093	3	Q8GXG1	GO:0051604; P:protein maturation; IBA:GO_Central	Arachis_valida|AravalEVm022518t4;Arachis_hypogaea_Tifguard|ArahypEVm014868t3;Arachis_hypogaea_SunOleic_97R|ArahypEVm014868t3
cluster1094	3	Q9SYG1	GO:0009651; P:response to salt stress; IBA:GO_Central	Arachis_valida|AravalEVm052990t1;Valsten1|AravsEVm038668t1;Arachis_stenosperma|ArasteEVm035320t1
cluster1095	3	P50694	GO:0008152; P:metabolic process; IEA:UniProtKB-KW	Arachis_valida|AravalEVm033034t2;Arachis_hypogaea_Tifguard|ArahypEVm016987t1;Arachis_hypogaea_SunOleic_97R|ArahypEVm016987t1
cluster1096	3	O82245	GO:0009651; P:response to salt stress; IEP:TAIR	Arachis_valida|AravalEVm042394t1;Arachis_stenosperma|ArasteEVm027881t1;Arachis_hypogaea_SunOleic_97R|ArahypEVm020765t1
cluster1097	3	N/A	N/A	Arachis_valida|AravalEVm001564t1;Valsten1|AravsEVm001027t2;Arachis_hypogaea_SunOleic_97R|ArahypEVm014912t1
cluster1098	3	P19143	GO:0006559; P:L-phenylalanine catabolic process; IEA:InterPro	Arachis_valida|AravalEVm004338t1;Arachis_hypogaea_Tifguard|ArahypEVm002083t2;Arachis_stenosperma|ArasteEVm002790t2
cluster1099	3	Q9FKA0	GO:0090400; P:stress-induced premature senescence; IMP:UniProtKB	Arachis_valida|AravalEVm023745t1;Valsten1|AravsEVm015877t1;Arachis_hypogaea_SunOleic_97R|ArahypEVm019528t1
cluster1100	3	Q8VWJ2	GO:0042659; P:regulation of cell fate specification; IMP:TAIR	Arachis_valida|AravalEVm019851t1;Arachis_hypogaea_Tifguard|ArahypEVm010626t1;Arachis_hypogaea_SunOleic_97R|ArahypEVm010626t1
cluster1101	3	I1L153	GO:0006144; P:purine nucleobase metabolic process; IEA:UniProtKB-KW	Arachis_valida|AravalEVm010206t6;Arachis_stenosperma|ArasteEVm006984t6;Arachis_hypogaea_SunOleic_97R|ArahypEVm005890t5
cluster1102	3	Q9SZJ2	GO:2000028; P:regulation of photoperiodism, flowering; IMP:TAIR	Arachis_valida|AravalEVm003478t1;Arachis_hypogaea_Tifguard|ArahypEVm001902t9;Arachis_hypogaea_SunOleic_97R|ArahypEVm001902t9
cluster1103	3	A0MFL4	N/A	Arachis_valida|AravalEVm036265t1;Arachis_stenosperma|ArasteEVm023942t1;Arachis_hypogaea_SunOleic_97R|ArahypEVm018420t1
cluster1104	3	N/A	N/A	Arachis_valida|AravalEVm030184t1;Valsten1|AravsEVm033562t1;Arachis_stenosperma|ArasteEVm051236t1
cluster1105	3	N/A	N/A	Arachis_valida|AravalEVm046317t1;Arachis_hypogaea_Tifguard|ArahypEVm035145t1;Arachis_hypogaea_SunOleic_97R|ArahypEVm035145t1
cluster1106	3	Q9FJB5	GO:0006952; P:defense response; IEA:UniProtKB-KW	Valsten1|AravsEVm001561t2;Arachis_hypogaea_Tifguard|ArahypEVm000677t16;Arachis_hypogaea_SunOleic_97R|ArahypEVm001465t2
cluster1107	3	Q9LRR4	GO:0006952; P:defense response; IEA:UniProtKB-KW	Arachis_hypogaea_Tifguard|ArahypEVm000269t9;Arachis_stenosperma|ArasteEVm008521t1;Arachis_stenosperma|ArasteEVm008521t2
cluster1108	3	P52581	GO:0016491; F:oxidoreductase activity; IEA:UniProtKB-KW	Arachis_valida|AravalEVm024034t1;Arachis_hypogaea_Tifguard|ArahypEVm012967t1;Arachis_hypogaea_SunOleic_97R|ArahypEVm012967t1
cluster1109	3	Q4WYG7	GO:0005886; C:plasma membrane; IEA:UniProtKB-SubCell	Arachis_valida|AravalEVm012654t1;Valsten1|AravsEVm010008t4;Arachis_hypogaea_SunOleic_97R|ArahypEVm017597t1
cluster1110	3	Q56ZZ7	GO:0005351; F:carbohydrate:proton symporter activity; IBA:GO_Central	Arachis_hypogaea_Tifguard|ArahypEVm005056t13;Arachis_stenosperma|ArasteEVm006827t4;Arachis_hypogaea_SunOleic_97R|ArahypEVm005056t13
cluster1111	3	N/A	N/A	Arachis_valida|AravalEVm033443t1;Valsten1|AravsEVm018451t1;Arachis_stenosperma|ArasteEVm019243t2
cluster1112	3	N/A	N/A	Arachis_valida|AravalEVm023059t1;Arachis_hypogaea_Tifguard|ArahypEVm011863t2;Arachis_hypogaea_SunOleic_97R|ArahypEVm012946t1
cluster1113	3	Q5XF57	GO:0006468; P:protein phosphorylation; IBA:GO_Central	Arachis_valida|AravalEVm006367t2;Valsten1|AravsEVm013774t1;Arachis_hypogaea_SunOleic_97R|ArahypEVm004921t3
cluster1114	3	Q2HIV9	GO:0046983; F:protein dimerization activity; IEA:InterPro	Arachis_valida|AravalEVm026515t2;Arachis_hypogaea_Tifguard|ArahypEVm016119t1;Arachis_hypogaea_SunOleic_97R|ArahypEVm016119t1
cluster1115	3	Q5EA79	GO:0006006; P:glucose metabolic process; IBA:GO_Central	Arachis_valida|AravalEVm017770t4;Valsten1|AravsEVm010141t5;Arachis_hypogaea_SunOleic_97R|ArahypEVm009787t4
cluster1116	3	Q9C9U5	GO:0010182; P:sugar mediated signaling pathway; IMP:TAIR	Arachis_valida|AravalEVm002946t2;Valsten1|AravsEVm001113t3;Arachis_stenosperma|ArasteEVm002548t4
cluster1117	3	Q9THX6	GO:0000302; P:response to reactive oxygen species; IBA:GO_Central	Arachis_valida|AravalEVm019834t1;Arachis_stenosperma|ArasteEVm013675t2;Arachis_hypogaea_SunOleic_97R|ArahypEVm014790t2
cluster1118	3	Q9USW5	GO:0006412; P:translation; IBA:GO_Central	Arachis_valida|AravalEVm066019t1;Valsten1|AravsEVm020245t3;Arachis_stenosperma|ArasteEVm020031t1
cluster1119	3	C0LGP4	GO:0004674; F:protein serine/threonine kinase activity; IEA:UniProtKB-KW	Arachis_valida|AravalEVm002332t1;Arachis_hypogaea_Tifguard|ArahypEVm000529t1;Arachis_stenosperma|ArasteEVm001044t3
cluster1120	3	Q944M5	GO:0051260; P:protein homooligomerization; IDA:UniProtKB	Arachis_valida|AravalEVm031921t1;Arachis_stenosperma|ArasteEVm016764t2;Arachis_hypogaea_SunOleic_97R|ArahypEVm016518t3
cluster1121	3	N/A	N/A	Arachis_stenosperma|ArasteEVm028095t1;Arachis_valida|AravalEVm055138t3;Arachis_hypogaea_SunOleic_97R|ArahypEVm021408t1
cluster1122	3	Q9FH04	GO:0008270; F:zinc ion binding; IEA:InterPro	Arachis_valida|AravalEVm026289t6;Valsten1|AravsEVm062284t1;Arachis_stenosperma|ArasteEVm012169t3
cluster1123	3	N/A	N/A	Arachis_valida|AravalEVm044747t1;Valsten1|AravsEVm022064t1;Arachis_stenosperma|ArasteEVm029919t1
cluster1124	3	Q0PGJ6	GO:0009414; P:response to water deprivation; IEP:UniProtKB	Arachis_valida|AravalEVm022957t1;Valsten1|AravsEVm015472t1;Arachis_stenosperma|ArasteEVm016218t2
cluster1125	3	Q9FJL3	GO:0000413; P:protein peptidyl-prolyl isomerization; IBA:GO_Central	Arachis_valida|AravalEVm007205t1;Valsten1|AravsEVm004882t1;Arachis_stenosperma|ArasteEVm008740t1
cluster1126	3	N/A	N/A	Arachis_valida|AravalEVm006637t1;Valsten1|AravsEVm004895t2;Arachis_hypogaea_Tifguard|ArahypEVm000488t1
cluster1127	3	N/A	N/A	Arachis_hypogaea_SunOleic_97R|ArahypEVm015327t1;Valsten1|AravsEVm024752t6;Arachis_hypogaea_Tifguard|ArahypEVm015327t1
cluster1128	3	Q9LSQ4	GO:0009826; P:unidimensional cell growth; IMP:TAIR	Arachis_valida|AravalEVm006345t1;Valsten1|AravsEVm004294t1;Arachis_hypogaea_Tifguard|ArahypEVm002870t3
cluster1129	3	O94225	GO:0019878; P:lysine biosynthetic process via aminoadipic acid; IEA:UniProtKB-UniPathway	Arachis_valida|AravalEVm028653t1;Arachis_stenosperma|ArasteEVm009263t1;Arachis_stenosperma|ArasteEVm010861t1
cluster1130	3	Q9ZPI5	GO:0006635; P:fatty acid beta-oxidation; IEP:TAIR	Valsten1|AravsEVm002194t4;Arachis_stenosperma|ArasteEVm009124t7;Arachis_hypogaea_SunOleic_97R|ArahypEVm001834t5
cluster1131	3	F4HNU6	GO:0004222; F:metalloendopeptidase activity; IEA:InterPro	Arachis_valida|AravalEVm001730t3;Arachis_stenosperma|ArasteEVm002524t2;Arachis_stenosperma|ArasteEVm002524t4
cluster1132	3	Q9FIU7	GO:0005975; P:carbohydrate metabolic process; IEA:InterPro	Arachis_valida|AravalEVm009393t2;Arachis_stenosperma|ArasteEVm010094t3;Arachis_hypogaea_SunOleic_97R|ArahypEVm007984t3
cluster1133	3	P46472	GO:0006511; P:ubiquitin-dependent protein catabolic process; ISS:UniProtKB	Arachis_valida|AravalEVm013955t2;Arachis_hypogaea_Tifguard|ArahypEVm007769t3;Arachis_hypogaea_SunOleic_97R|ArahypEVm007769t2
cluster1134	3	P32295	GO:0009733; P:response to auxin; IEA:InterPro	Arachis_valida|AravalEVm037653t1;Valsten1|AravsEVm025855t1;Arachis_hypogaea_SunOleic_97R|ArahypEVm019627t2
cluster1135	3	O64948	GO:0006625; P:protein targeting to peroxisome; IBA:GO_Central	Arachis_valida|AravalEVm012946t3;Arachis_hypogaea_SunOleic_97R|ArahypEVm000836t6;Valsten1|AravsEVm002384t3
cluster1136	3	B5X0I6	GO:0051569; P:regulation of histone H3-K4 methylation; IBA:GO_Central	Arachis_valida|AravalEVm000997t8;Arachis_stenosperma|ArasteEVm001367t1;Arachis_stenosperma|ArasteEVm001367t4
cluster1137	3	Q8VWZ7	GO:0016099; P:monoterpenoid biosynthetic process; IDA:UniProtKB	Arachis_valida|AravalEVm009862t1;Arachis_hypogaea_Tifguard|ArahypEVm005163t1;Arachis_hypogaea_SunOleic_97R|ArahypEVm005163t1
cluster1138	3	P37122	GO:0016705; F:oxidoreductase activity, acting on paired donors, with incorporation or reduction of molecular oxygen; IEA:InterPro	Valsten1|AravsEVm005637t1;Arachis_hypogaea_Tifguard|ArahypEVm005029t1;Arachis_hypogaea_SunOleic_97R|ArahypEVm005029t1
cluster1139	3	Q8VWZ7	GO:0016099; P:monoterpenoid biosynthetic process; IDA:UniProtKB	Arachis_stenosperma|ArasteEVm006954t4;Arachis_hypogaea_Tifguard|ArahypEVm004111t3;Arachis_hypogaea_SunOleic_97R|ArahypEVm004111t3
cluster1140	3	N/A	N/A	Arachis_valida|AravalEVm046321t1;Arachis_hypogaea_Tifguard|ArahypEVm024426t1;Arachis_stenosperma|ArasteEVm021919t1
cluster1141	3	P0C8Q4	N/A	Arachis_valida|AravalEVm013655t1;Valsten1|AravsEVm009237t1;Arachis_hypogaea_Tifguard|ArahypEVm007258t1
cluster1142	3	Q9SYY4	GO:0042761; P:very long-chain fatty acid biosynthetic process; IBA:GO_Central	Arachis_valida|AravalEVm026755t1;Arachis_hypogaea_Tifguard|ArahypEVm014224t1;Arachis_hypogaea_SunOleic_97R|ArahypEVm014935t1
cluster1143	3	Q9LXT9	GO:0008360; P:regulation of cell shape; IEA:UniProtKB-KW	Arachis_hypogaea_Tifguard|ArahypEVm000015t7;Arachis_stenosperma|ArasteEVm000225t9;Arachis_hypogaea_SunOleic_97R|ArahypEVm000237t11
cluster1144	3	Q0WPH8	GO:0007017; P:microtubule-based process; IMP:TAIR	Arachis_valida|AravalEVm001351t1;Valsten1|AravsEVm000775t4;Arachis_stenosperma|ArasteEVm003956t4
cluster1145	3	Q9SS87	GO:0010088; P:phloem development; IMP:UniProtKB	Arachis_valida|AravalEVm004782t2;Arachis_hypogaea_Tifguard|ArahypEVm003823t1;Arachis_hypogaea_SunOleic_97R|ArahypEVm003823t1
cluster1146	3	C7G304	GO:0006012; P:galactose metabolic process; IEA:UniProtKB-KW	Arachis_valida|AravalEVm022526t1;Valsten1|AravsEVm015149t1;Arachis_hypogaea_SunOleic_97R|ArahypEVm012165t1
cluster1147	3	Q1PDI2	GO:0007205; P:protein kinase C-activating G protein-coupled receptor signaling pathway; IEA:InterPro	Arachis_valida|AravalEVm011334t2;Arachis_stenosperma|ArasteEVm007976t5;Arachis_hypogaea_SunOleic_97R|ArahypEVm005680t2
cluster1148	3	N/A	N/A	Arachis_valida|AravalEVm038666t1;Arachis_hypogaea_Tifguard|ArahypEVm019393t1;Arachis_hypogaea_SunOleic_97R|ArahypEVm019393t1
cluster1149	3	Q9FG13	GO:0052689; F:carboxylic ester hydrolase activity; IEA:UniProtKB-KW	Arachis_valida|AravalEVm022450t1;Arachis_hypogaea_Tifguard|ArahypEVm011761t2;Arachis_hypogaea_SunOleic_97R|ArahypEVm011761t2
cluster1150	3	Q9LQL2	GO:0010167; P:response to nitrate; IEP:TAIR	Arachis_valida|AravalEVm006425t1;Arachis_hypogaea_Tifguard|ArahypEVm010019t1;Arachis_hypogaea_SunOleic_97R|ArahypEVm010019t1
cluster1151	3	P24805	N/A	Arachis_valida|AravalEVm030983t1;Valsten1|AravsEVm020950t1;Arachis_hypogaea_SunOleic_97R|ArahypEVm015976t3
cluster1152	3	Q9P6C8	GO:0006116; P:NADH oxidation; IBA:GO_Central	Arachis_valida|AravalEVm018178t1;Arachis_stenosperma|ArasteEVm012568t1;Arachis_hypogaea_SunOleic_97R|ArahypEVm010428t2
cluster1153	3	Q86V88	GO:0004725; F:protein tyrosine phosphatase activity; IEA:UniProtKB-EC	Arachis_valida|AravalEVm045980t1;Arachis_hypogaea_SunOleic_97R|ArahypEVm022263t2;Arachis_hypogaea_SunOleic_97R|ArahypEVm022263t4
cluster1154	3	Q500U8	GO:0080110; P:sporopollenin biosynthetic process; IMP:TAIR	Arachis_stenosperma|ArasteEVm016309t1;Arachis_hypogaea_Tifguard|ArahypEVm012277t4;Arachis_hypogaea_SunOleic_97R|ArahypEVm012163t1
cluster1155	3	N/A	N/A	Arachis_valida|AravalEVm003189t5;Arachis_stenosperma|ArasteEVm009943t1;Arachis_hypogaea_SunOleic_97R|ArahypEVm020713t1
cluster1156	3	Q8GW96	GO:0016887; F:ATPase activity; IEA:UniProtKB-EC	Arachis_valida|AravalEVm011069t1;Arachis_hypogaea_Tifguard|ArahypEVm011865t1;Arachis_hypogaea_SunOleic_97R|ArahypEVm011865t1
cluster1157	3	P05100	GO:0006284; P:base-excision repair; IEA:InterPro	Arachis_valida|AravalEVm019975t1;Valsten1|AravsEVm013482t1;Arachis_stenosperma|ArasteEVm011951t2
cluster1158	3	Q949Q5	GO:0009767; P:photosynthetic electron transport chain; IMP:UniProtKB	Arachis_valida|AravalEVm060405t1;Arachis_hypogaea_Tifguard|ArahypEVm028092t2;Arachis_hypogaea_SunOleic_97R|ArahypEVm028092t2
cluster1159	3	Q5NA18	GO:0010486; F:manganese:proton antiporter activity; IBA:GO_Central	Arachis_valida|AravalEVm013045t1;Arachis_hypogaea_SunOleic_97R|ArahypEVm008316t5;Arachis_hypogaea_SunOleic_97R|ArahypEVm008316t10
cluster1160	3	Q9ZVC9	GO:0006355; P:regulation of transcription, DNA-templated; IEA:InterPro	Arachis_valida|AravalEVm001818t5;Arachis_stenosperma|ArasteEVm002322t1;Arachis_hypogaea_SunOleic_97R|ArahypEVm020639t1
cluster1161	3	O04647	GO:0005739; C:mitochondrion; IBA:GO_Central	Arachis_valida|AravalEVm001041t7;Arachis_stenosperma|ArasteEVm000791t2;Arachis_stenosperma|ArasteEVm000791t3
cluster1162	3	A7XN92	GO:0006397; P:mRNA processing; IEA:UniProtKB-KW	Arachis_valida|AravalEVm003428t5;Arachis_hypogaea_SunOleic_97R|ArahypEVm001248t4;Arachis_stenosperma|ArasteEVm002022t6
cluster1163	3	Q43089	GO:0005975; P:carbohydrate metabolic process; IEA:InterPro	Arachis_valida|AravalEVm010994t2;Arachis_hypogaea_Tifguard|ArahypEVm003778t2;Arachis_hypogaea_SunOleic_97R|ArahypEVm003778t2
cluster1164	3	F4JIJ7	GO:0006355; P:regulation of transcription, DNA-templated; TAS:TAIR	Arachis_valida|AravalEVm041345t1;Arachis_stenosperma|ArasteEVm023827t1;Arachis_hypogaea_SunOleic_97R|ArahypEVm017975t1
cluster1165	3	N/A	N/A	Arachis_valida|AravalEVm034321t1;Valsten1|AravsEVm021251t1;Arachis_stenosperma|ArasteEVm019670t1
cluster1166	3	Q9FJ07	GO:0010224; P:response to UV-B; IMP:UniProtKB	Arachis_valida|AravalEVm023083t1;Arachis_hypogaea_Tifguard|ArahypEVm012457t1;Arachis_hypogaea_SunOleic_97R|ArahypEVm012457t1
cluster1167	3	O81832	GO:0048544; P:recognition of pollen; IEA:InterPro	Arachis_valida|AravalEVm002827t1;Valsten1|AravsEVm001669t2;Arachis_hypogaea_SunOleic_97R|ArahypEVm002046t1
cluster1168	3	O26373	N/A	Arachis_valida|AravalEVm048004t1;Valsten1|AravsEVm027393t4;Arachis_stenosperma|ArasteEVm031600t1
cluster1169	3	N/A	N/A	Arachis_valida|AravalEVm084971t1;Valsten1|AravsEVm068409t2;Arachis_hypogaea_SunOleic_97R|ArahypEVm035836t1
cluster1170	3	N/A	N/A	Arachis_valida|AravalEVm053372t1;Arachis_hypogaea_Tifguard|ArahypEVm025201t1;Arachis_hypogaea_SunOleic_97R|ArahypEVm025201t1
cluster1171	3	Q96UL8	GO:0006094; P:gluconeogenesis; IBA:GO_Central	Arachis_valida|AravalEVm004046t4;Arachis_stenosperma|ArasteEVm005612t2;Arachis_hypogaea_SunOleic_97R|ArahypEVm006974t2
cluster1172	3	N/A	N/A	Arachis_valida|AravalEVm043141t1;Valsten1|AravsEVm017178t7;Arachis_stenosperma|ArasteEVm019110t1
cluster1173	3	N/A	N/A	Arachis_valida|AravalEVm009593t8;Valsten1|AravsEVm007019t2;Arachis_stenosperma|ArasteEVm006774t1
cluster1174	3	O02695	GO:0007269; P:neurotransmitter secretion; ISS:UniProtKB	Arachis_valida|AravalEVm002635t1;Valsten1|AravsEVm013969t2;Arachis_stenosperma|ArasteEVm019430t1
cluster1175	3	O48963	GO:0009637; P:response to blue light; IGI:TAIR	Valsten1|AravsEVm001108t2;Arachis_stenosperma|ArasteEVm004916t2;Arachis_hypogaea_SunOleic_97R|ArahypEVm000689t1
cluster1176	3	Q58FZ0	GO:0030001; P:metal ion transport; IEA:InterPro	Arachis_valida|AravalEVm060343t1;Arachis_hypogaea_Tifguard|ArahypEVm027101t1;Arachis_hypogaea_SunOleic_97R|ArahypEVm027101t1
cluster1177	3	P49599	GO:0080005; P:photosystem stoichiometry adjustment; IMP:TAIR	Arachis_valida|AravalEVm016673t6;Arachis_hypogaea_Tifguard|ArahypEVm009167t5;Arachis_hypogaea_SunOleic_97R|ArahypEVm009167t24
cluster1178	3	Q9LT91	GO:0006979; P:response to oxidative stress; IEA:InterPro	Valsten1|AravsEVm015664t1;Arachis_hypogaea_Tifguard|ArahypEVm012734t1;Arachis_hypogaea_SunOleic_97R|ArahypEVm012023t1
cluster1179	3	Q94KE2	GO:0048511; P:rhythmic process; IEA:UniProtKB-KW	Arachis_valida|AravalEVm000234t7;Arachis_stenosperma|ArasteEVm000202t3;Valsten1|AravsEVm000688t4
cluster1180	3	Q9LYG9	GO:0097468; P:programmed cell death in response to reactive oxygen species; IMP:TAIR	Valsten1|AravsEVm001939t2;Arachis_hypogaea_SunOleic_97R|ArahypEVm001259t1;Arachis_stenosperma|ArasteEVm002539t3
cluster1181	3	Q9FK76	GO:0004252; F:serine-type endopeptidase activity; IEA:InterPro	Arachis_valida|AravalEVm002823t2;Arachis_stenosperma|ArasteEVm002120t1;Arachis_hypogaea_SunOleic_97R|ArahypEVm003826t2
cluster1182	3	P01067	GO:0004867; F:serine-type endopeptidase inhibitor activity; IEA:UniProtKB-KW	Arachis_valida|AravalEVm073479t5;Arachis_hypogaea_SunOleic_97R|ArahypEVm033552t1;Arachis_hypogaea_SunOleic_97R|ArahypEVm034216t1
cluster1183	3	N/A	N/A	Arachis_valida|AravalEVm054511t1;Valsten1|AravsEVm039734t1;Arachis_hypogaea_SunOleic_97R|ArahypEVm025644t1
cluster1184	3	Q58FX0	GO:0006952; P:defense response; IEA:UniProtKB-KW	Arachis_valida|AravalEVm042417t1;Arachis_hypogaea_Tifguard|ArahypEVm020859t1;Arachis_hypogaea_SunOleic_97R|ArahypEVm020859t1
cluster1185	3	O82312	GO:0043631; P:RNA polyadenylation; IDA:TAIR	Arachis_valida|AravalEVm009473t7;Arachis_stenosperma|ArasteEVm002369t2;Arachis_hypogaea_SunOleic_97R|ArahypEVm001932t2
cluster1186	3	N/A	N/A	Arachis_valida|AravalEVm069286t1;Valsten1|AravsEVm053050t2;Arachis_stenosperma|ArasteEVm046194t1
cluster1187	3	Q41249	GO:0015979; P:photosynthesis; IEA:UniProtKB-KW	Arachis_valida|AravalEVm016186t1;Valsten1|AravsEVm015397t1;Arachis_hypogaea_SunOleic_97R|ArahypEVm011625t2
cluster1188	3	P93836	GO:0006572; P:tyrosine catabolic process; IBA:GO_Central	Arachis_valida|AravalEVm048016t1;Valsten1|AravsEVm009173t1;Arachis_stenosperma|ArasteEVm009494t1
cluster1189	3	Q8TG13	GO:0004674; F:protein serine/threonine kinase activity; IEA:UniProtKB-KW	Arachis_valida|AravalEVm022025t1;Arachis_hypogaea_Tifguard|ArahypEVm013173t1;Arachis_stenosperma|ArasteEVm008687t1
cluster1190	3	P00723	GO:0005975; P:carbohydrate metabolic process; IEA:InterPro	Arachis_valida|AravalEVm001103t1;Arachis_stenosperma|ArasteEVm000665t3;Arachis_hypogaea_SunOleic_97R|ArahypEVm000309t5
cluster1191	3	A0A0M4KE44	GO:0042285; F:xylosyltransferase activity; IDA:UniProtKB	Arachis_valida|AravalEVm012210t1;Arachis_hypogaea_Tifguard|ArahypEVm006549t2;Arachis_hypogaea_SunOleic_97R|ArahypEVm006549t2
cluster1192	3	Q5JK32	GO:0006813; P:potassium ion transport; IBA:GO_Central	Arachis_valida|AravalEVm003344t1;Arachis_hypogaea_Tifguard|ArahypEVm005834t2;Arachis_stenosperma|ArasteEVm022820t1
cluster1193	3	P49209	GO:0002181; P:cytoplasmic translation; IBA:GO_Central	Arachis_valida|AravalEVm041930t2;Valsten1|AravsEVm029177t1;Arachis_stenosperma|ArasteEVm027514t1
cluster1194	3	Q9M886	GO:0006355; P:regulation of transcription, DNA-templated; IDA:TAIR	Arachis_hypogaea_Tifguard|ArahypEVm013900t2;Arachis_stenosperma|ArasteEVm017603t2;Arachis_hypogaea_SunOleic_97R|ArahypEVm013900t2
cluster1195	3	F4KDN0	GO:0009911; P:positive regulation of flower development; IMP:UniProtKB	Arachis_valida|AravalEVm004613t3;Valsten1|AravsEVm004005t4;Arachis_stenosperma|ArasteEVm004305t3
cluster1196	3	Q17RB8	GO:0000209; P:protein polyubiquitination; TAS:Reactome	Arachis_valida|AravalEVm009684t1;Arachis_stenosperma|ArasteEVm007787t2;Arachis_stenosperma|ArasteEVm007787t3
cluster1197	3	Q6YU51	GO:0009228; P:thiamine biosynthetic process; IEA:UniProtKB-KW	Arachis_valida|AravalEVm003485t2;Arachis_hypogaea_Tifguard|ArahypEVm009542t1;Arachis_hypogaea_SunOleic_97R|ArahypEVm009542t1
cluster1198	3	Q9C6A6	GO:0005886; C:plasma membrane; IEA:UniProtKB-SubCell	Arachis_valida|AravalEVm002606t2;Arachis_hypogaea_Tifguard|ArahypEVm001152t2;Arachis_hypogaea_SunOleic_97R|ArahypEVm001152t2
cluster1199	3	Q8S9G6	GO:0042617; P:paclitaxel biosynthetic process; IEA:UniProtKB-UniPathway	Arachis_valida|AravalEVm017860t1;Valsten1|AravsEVm011637t1;Valsten1|AravsEVm011637t5
cluster1200	3	Q9FI21	GO:0009651; P:response to salt stress; IMP:UniProtKB	Arachis_valida|AravalEVm008768t1;Arachis_hypogaea_Tifguard|ArahypEVm004430t3;Arachis_hypogaea_SunOleic_97R|ArahypEVm004430t3
cluster1201	3	O94111	GO:0043935; P:sexual sporulation resulting in formation of a cellular spore; IMP:AspGD	Arachis_valida|AravalEVm073426t1;Arachis_hypogaea_Tifguard|ArahypEVm035018t1;Arachis_hypogaea_SunOleic_97R|ArahypEVm035018t1
cluster1202	3	Q9C639	GO:0009645; P:response to low light intensity stimulus; IEP:UniProtKB	Arachis_valida|AravalEVm029175t4;Arachis_hypogaea_Tifguard|ArahypEVm014413t4;Arachis_hypogaea_SunOleic_97R|ArahypEVm014413t4
cluster1203	3	Q41001	GO:0046872; F:metal ion binding; IEA:UniProtKB-KW	Arachis_valida|AravalEVm042631t1;Arachis_hypogaea_Tifguard|ArahypEVm020966t1;Arachis_hypogaea_SunOleic_97R|ArahypEVm020966t1
cluster1204	3	Q0IQU1	GO:0046274; P:lignin catabolic process; IEA:UniProtKB-KW	Arachis_valida|AravalEVm007667t1;Valsten1|AravsEVm005067t1;Arachis_hypogaea_SunOleic_97R|ArahypEVm003774t1
cluster1205	3	Q4WIF3	GO:0042026; P:protein refolding; IBA:GO_Central	Arachis_valida|AravalEVm018097t1;Valsten1|AravsEVm012382t2;Arachis_stenosperma|ArasteEVm022564t4
cluster1206	3	Q9FGS8	GO:0016021; C:integral component of membrane; IEA:UniProtKB-KW	Arachis_valida|AravalEVm001273t3;Arachis_stenosperma|ArasteEVm000935t3;Arachis_hypogaea_SunOleic_97R|ArahypEVm007650t1
cluster1207	3	O13965	GO:0051321; P:meiotic cell cycle; IEA:UniProtKB-KW	Arachis_valida|AravalEVm008189t1;Valsten1|AravsEVm005671t5;Arachis_hypogaea_Tifguard|ArahypEVm003822t3
cluster1208	3	F4K5L5	GO:0016413; F:O-acetyltransferase activity; IBA:GO_Central	Arachis_valida|AravalEVm011471t3;Valsten1|AravsEVm007731t1;Arachis_hypogaea_Tifguard|ArahypEVm006120t3
cluster1209	3	Q9FK44	GO:0003700; F:DNA-binding transcription factor activity; ISS:TAIR	Arachis_valida|AravalEVm016413t1;Arachis_hypogaea_Tifguard|ArahypEVm008905t1;Arachis_hypogaea_SunOleic_97R|ArahypEVm008905t1
cluster1210	3	Q9FLJ2	GO:0003700; F:DNA-binding transcription factor activity; ISS:TAIR	Arachis_valida|AravalEVm022139t1;Arachis_hypogaea_Tifguard|ArahypEVm012402t1;Arachis_hypogaea_SunOleic_97R|ArahypEVm012402t1
cluster1211	3	F4JN35	GO:0006355; P:regulation of transcription, DNA-templated; TAS:TAIR	Arachis_stenosperma|ArasteEVm003154t5;Arachis_hypogaea_Tifguard|ArahypEVm014891t1;Arachis_hypogaea_SunOleic_97R|ArahypEVm014891t1
cluster1212	3	Q9LYD3	GO:0045893; P:positive regulation of transcription, DNA-templated; IDA:TAIR	Arachis_valida|AravalEVm032834t1;Valsten1|AravsEVm022734t2;Arachis_hypogaea_SunOleic_97R|ArahypEVm013987t2
cluster1213	3	Q9FLB6	GO:0016192; P:vesicle-mediated transport; IDA:TAIR	Arachis_valida|AravalEVm035755t1;Valsten1|AravsEVm024465t1;Arachis_hypogaea_Tifguard|ArahypEVm018190t1
cluster1214	3	N/A	N/A	Arachis_valida|AravalEVm022567t4;Arachis_stenosperma|ArasteEVm015894t2;Arachis_stenosperma|ArasteEVm015894t3
cluster1215	3	Q642R9	GO:0005096; F:GTPase activator activity; IEA:UniProtKB-KW	Arachis_valida|AravalEVm008128t4;Arachis_stenosperma|ArasteEVm002538t2;Arachis_hypogaea_SunOleic_97R|ArahypEVm006905t8
cluster1216	3	N/A	N/A	Arachis_valida|AravalEVm068619t1;Arachis_hypogaea_Tifguard|ArahypEVm031551t1;Arachis_hypogaea_SunOleic_97R|ArahypEVm031551t1
cluster1217	3	P27057	GO:0005576; C:extracellular region; IEA:UniProtKB-SubCell	Arachis_valida|AravalEVm066767t1;Valsten1|AravsEVm050774t1;Arachis_hypogaea_SunOleic_97R|ArahypEVm030716t3
cluster1218	3	Q58D31	GO:0006062; P:sorbitol catabolic process; IEA:Ensembl	Arachis_valida|AravalEVm019904t1;Arachis_hypogaea_SunOleic_97R|ArahypEVm010329t5;Arachis_hypogaea_SunOleic_97R|ArahypEVm010329t6
cluster1219	3	A0A072VMJ3	GO:0005249; F:voltage-gated potassium channel activity; IEA:InterPro	Arachis_valida|AravalEVm004739t1;Valsten1|AravsEVm003155t1;Arachis_stenosperma|ArasteEVm002748t2
cluster1220	3	P36907	GO:0000272; P:polysaccharide catabolic process; IEA:UniProtKB-KW	Arachis_valida|AravalEVm022891t1;Arachis_hypogaea_Tifguard|ArahypEVm012070t1;Arachis_hypogaea_SunOleic_97R|ArahypEVm012070t1
cluster1221	3	F4KBW6	GO:0015031; P:protein transport; IEA:UniProtKB-KW	Arachis_valida|AravalEVm000105t4;Arachis_stenosperma|ArasteEVm000106t1;Arachis_stenosperma|ArasteEVm000106t3
cluster1222	3	Q9ZU51	GO:0080167; P:response to karrikin; IEP:TAIR	Arachis_valida|AravalEVm053370t1;Valsten1|AravsEVm038630t1;Arachis_hypogaea_SunOleic_97R|ArahypEVm025191t1
cluster1223	3	Q9M2S4	GO:0002229; P:defense response to oomycetes; IMP:UniProtKB	Arachis_stenosperma|ArasteEVm003333t3;Arachis_hypogaea_Tifguard|ArahypEVm002040t6;Arachis_hypogaea_SunOleic_97R|ArahypEVm007288t1
cluster1224	3	Q70II3	GO:0048510; P:regulation of timing of transition from vegetative to reproductive phase; IMP:TAIR	Arachis_valida|AravalEVm028945t2;Arachis_hypogaea_Tifguard|ArahypEVm013756t1;Arachis_hypogaea_SunOleic_97R|ArahypEVm013756t1
cluster1225	3	Q6NUT3	GO:0008643; P:carbohydrate transport; IEA:InterPro	Arachis_valida|AravalEVm012941t5;Arachis_hypogaea_SunOleic_97R|ArahypEVm009523t7;Arachis_hypogaea_SunOleic_97R|ArahypEVm009523t11
cluster1226	3	Q8VZ02	GO:0006355; P:regulation of transcription, DNA-templated; TAS:TAIR	Arachis_valida|AravalEVm020698t2;Arachis_stenosperma|ArasteEVm013927t2;Arachis_hypogaea_SunOleic_97R|ArahypEVm011470t4
cluster1227	3	Q6JN46	GO:0050832; P:defense response to fungus; IDA:UniProtKB	Valsten1|AravsEVm000659t7;Arachis_hypogaea_Tifguard|ArahypEVm000376t2;Arachis_hypogaea_SunOleic_97R|ArahypEVm000323t2
cluster1228	3	N/A	N/A	Arachis_valida|AravalEVm003920t6;Arachis_hypogaea_Tifguard|ArahypEVm001784t1;Valsten1|AravsEVm037412t1
cluster1229	3	P52711	GO:0004185; F:serine-type carboxypeptidase activity; IEA:InterPro	Arachis_valida|AravalEVm010427t3;Arachis_stenosperma|ArasteEVm007688t2;Arachis_hypogaea_SunOleic_97R|ArahypEVm005815t3
cluster1230	3	Q06394	GO:0006952; P:defense response; IEA:InterPro	Arachis_valida|AravalEVm052955t1;Arachis_stenosperma|ArasteEVm035051t2;Arachis_hypogaea_SunOleic_97R|ArahypEVm025020t2
cluster1231	3	Q93WI9	GO:0048575; P:short-day photoperiodism, flowering; IMP:UniProtKB	Arachis_valida|AravalEVm045768t1;Arachis_hypogaea_Tifguard|ArahypEVm021845t1;Arachis_hypogaea_SunOleic_97R|ArahypEVm021834t2
cluster1232	3	N/A	N/A	Arachis_valida|AravalEVm008616t4;Valsten1|AravsEVm002491t2;Arachis_stenosperma|ArasteEVm015505t1
cluster1233	3	Q9WVG5	GO:0043691; P:reverse cholesterol transport; ISO:MGI	Arachis_valida|AravalEVm023848t1;Valsten1|AravsEVm016013t1;Arachis_stenosperma|ArasteEVm010736t3
cluster1234	3	Q9ZW06	GO:0006417; P:regulation of translation; IEA:UniProtKB-KW	Arachis_valida|AravalEVm000774t3;Valsten1|AravsEVm001005t9;Arachis_stenosperma|ArasteEVm000998t1
cluster1235	3	N/A	N/A	Arachis_valida|AravalEVm025516t1;Valsten1|AravsEVm017141t1;Arachis_stenosperma|ArasteEVm017213t1
cluster1236	3	Q94F39	GO:0007165; P:signal transduction; IEA:InterPro	Arachis_valida|AravalEVm033772t1;Arachis_stenosperma|ArasteEVm021879t1;Arachis_hypogaea_SunOleic_97R|ArahypEVm020435t1
cluster1237	3	Q9SK08	N/A	Arachis_valida|AravalEVm034715t1;Arachis_hypogaea_Tifguard|ArahypEVm019044t2;Arachis_hypogaea_SunOleic_97R|ArahypEVm019044t2
cluster1238	3	N/A	N/A	Arachis_valida|AravalEVm052967t1;Valsten1|AravsEVm038371t1;Arachis_hypogaea_Tifguard|ArahypEVm025052t2
cluster1239	3	Q7XSQ9	GO:0009414; P:response to water deprivation; IBA:GO_Central	Arachis_valida|AravalEVm026869t1;Arachis_hypogaea_SunOleic_97R|ArahypEVm020271t1;Arachis_hypogaea_SunOleic_97R|ArahypEVm020271t2
cluster1240	3	P51069	GO:0009058; P:biosynthetic process; IEA:InterPro	Arachis_valida|AravalEVm016881t5;Arachis_hypogaea_Tifguard|ArahypEVm009140t4;Arachis_hypogaea_SunOleic_97R|ArahypEVm009160t1
cluster1241	3	Q9LY48	GO:2000022; P:regulation of jasmonic acid mediated signaling pathway; IGI:TAIR	Arachis_valida|AravalEVm018256t2;Arachis_hypogaea_Tifguard|ArahypEVm009945t1;Arachis_hypogaea_SunOleic_97R|ArahypEVm009945t1
cluster1242	3	P51613	GO:0000272; P:polysaccharide catabolic process; IEA:UniProtKB-KW	Arachis_valida|AravalEVm029704t1;Valsten1|AravsEVm019988t1;Arachis_hypogaea_SunOleic_97R|ArahypEVm015584t1
cluster1243	3	Q04980	GO:0009414; P:response to water deprivation; IEP:TAIR	Arachis_valida|AravalEVm004804t1;Valsten1|AravsEVm003215t5;Arachis_stenosperma|ArasteEVm003364t6
cluster1244	3	P27080	GO:0022857; F:transmembrane transporter activity; IEA:InterPro	Arachis_valida|AravalEVm029264t1;Arachis_stenosperma|ArasteEVm015925t1;Arachis_hypogaea_SunOleic_97R|ArahypEVm012937t2
cluster1245	3	P0CG74	GO:0005634; C:nucleus; IEA:UniProtKB-SubCell	Arachis_valida|AravalEVm026037t1;Arachis_stenosperma|ArasteEVm011667t3;Arachis_stenosperma|ArasteEVm012262t8
cluster1246	3	Q9LXI7	GO:0046872; F:metal ion binding; IEA:UniProtKB-KW	Arachis_valida|AravalEVm013821t1;Arachis_stenosperma|ArasteEVm009797t1;Arachis_hypogaea_SunOleic_97R|ArahypEVm012136t3
cluster1247	3	Q6NLQ8	GO:0006511; P:ubiquitin-dependent protein catabolic process; IDA:TAIR	Arachis_valida|AravalEVm009282t3;Valsten1|AravsEVm006242t2;Arachis_stenosperma|ArasteEVm006573t4
cluster1248	3	Q9XHM5	GO:0009686; P:gibberellin biosynthetic process; IEA:UniProtKB-UniPathway	Arachis_valida|AravalEVm020957t2;Valsten1|AravsEVm014142t3;Arachis_stenosperma|ArasteEVm014345t2
cluster1249	3	O04012	GO:0009734; P:auxin-activated signaling pathway; IEA:UniProtKB-KW	Arachis_valida|AravalEVm036401t1;Arachis_hypogaea_Tifguard|ArahypEVm018496t1;Arachis_hypogaea_SunOleic_97R|ArahypEVm018496t1
cluster1250	3	N/A	N/A	Arachis_valida|AravalEVm021740t2;Arachis_hypogaea_Tifguard|ArahypEVm011781t1;Arachis_hypogaea_SunOleic_97R|ArahypEVm011781t1
cluster1251	3	O74476	GO:0006610; P:ribosomal protein import into nucleus; IBA:GO_Central	Arachis_valida|AravalEVm000941t1;Arachis_stenosperma|ArasteEVm000643t2;Arachis_hypogaea_Tifguard|ArahypEVm017911t3
cluster1252	3	A9X7L0	GO:0046983; F:protein dimerization activity; IEA:InterPro	Arachis_valida|AravalEVm017193t4;Arachis_hypogaea_Tifguard|ArahypEVm009278t4;Arachis_hypogaea_SunOleic_97R|ArahypEVm009278t4
cluster1253	3	O13790	GO:0006511; P:ubiquitin-dependent protein catabolic process; IBA:GO_Central	Arachis_valida|AravalEVm021688t1;Valsten1|AravsEVm002115t2;Arachis_hypogaea_Tifguard|ArahypEVm003343t7
cluster1254	3	P0CZ23	GO:0051791; P:medium-chain fatty acid metabolic process; TAS:TAIR	Arachis_hypogaea_SunOleic_97R|ArahypEVm007612t4;Arachis_valida|AravalEVm018929t3;Arachis_stenosperma|ArasteEVm003376t2
cluster1255	3	Q84QC2	GO:0009873; P:ethylene-activated signaling pathway; IEA:UniProtKB-KW	Arachis_valida|AravalEVm033506t1;Arachis_hypogaea_SunOleic_97R|ArahypEVm019323t1;Arachis_hypogaea_SunOleic_97R|ArahypEVm019323t2
cluster1256	3	Q6NNI3	GO:0009826; P:unidimensional cell growth; IMP:TAIR	Arachis_valida|AravalEVm044093t1;Arachis_hypogaea_SunOleic_97R|ArahypEVm016246t1;Arachis_hypogaea_SunOleic_97R|ArahypEVm016460t1
cluster1257	3	C0LGN2	GO:0045088; P:regulation of innate immune response; IMP:TAIR	Arachis_valida|AravalEVm026167t3;Valsten1|AravsEVm005142t1;Arachis_stenosperma|ArasteEVm004355t6
cluster1258	3	Q9FUS8	GO:0009407; P:toxin catabolic process; TAS:TAIR	Arachis_valida|AravalEVm030691t2;Arachis_hypogaea_Tifguard|ArahypEVm017276t1;Arachis_hypogaea_SunOleic_97R|ArahypEVm017276t1
cluster1259	3	Q9LLL8	GO:0004252; F:serine-type endopeptidase activity; IEA:InterPro	Arachis_valida|AravalEVm003518t1;Valsten1|AravsEVm005183t1;Arachis_hypogaea_SunOleic_97R|ArahypEVm001628t1
cluster1260	3	I1N462	GO:0004252; F:serine-type endopeptidase activity; IEA:InterPro	Arachis_stenosperma|ArasteEVm002107t1;Valsten1|AravsEVm001802t1;Arachis_hypogaea_SunOleic_97R|ArahypEVm002485t1
cluster1261	3	Q6EPF0	GO:0006355; P:regulation of transcription, DNA-templated; IEA:InterPro	Arachis_valida|AravalEVm003013t8;Valsten1|AravsEVm001983t8;Arachis_stenosperma|ArasteEVm002207t3
cluster1262	3	O81833	GO:0048544; P:recognition of pollen; IEA:InterPro	Arachis_valida|AravalEVm025829t1;Arachis_hypogaea_Tifguard|ArahypEVm017210t1;Arachis_hypogaea_SunOleic_97R|ArahypEVm017210t1
cluster1263	3	P36629	GO:0000245; P:spliceosomal complex assembly; IMP:PomBase	Arachis_valida|AravalEVm008044t1;Valsten1|AravsEVm005391t3;Arachis_stenosperma|ArasteEVm004597t3
cluster1264	3	Q94KT8	GO:0009651; P:response to salt stress; IMP:TAIR	Arachis_valida|AravalEVm015216t1;Arachis_hypogaea_Tifguard|ArahypEVm008229t1;Arachis_hypogaea_SunOleic_97R|ArahypEVm008229t1
cluster1265	3	Q9ZU95	GO:0046872; F:metal ion binding; IEA:UniProtKB-KW	Arachis_valida|AravalEVm043357t1;Arachis_hypogaea_SunOleic_97R|ArahypEVm023270t3;Arachis_hypogaea_SunOleic_97R|ArahypEVm023270t1
cluster1266	3	P26690	GO:0009813; P:flavonoid biosynthetic process; IEA:UniProtKB-KW	Arachis_valida|AravalEVm014070t1;Arachis_hypogaea_Tifguard|ArahypEVm012922t1;Arachis_hypogaea_SunOleic_97R|ArahypEVm012922t1
cluster1267	3	Q38876	GO:0045944; P:positive regulation of transcription by RNA polymerase II; IEA:InterPro	Arachis_valida|AravalEVm039206t1;Arachis_hypogaea_Tifguard|ArahypEVm015359t1;Arachis_hypogaea_SunOleic_97R|ArahypEVm015359t1
cluster1268	3	Q8RWN7	GO:0006355; P:regulation of transcription, DNA-templated; IGI:TAIR	Arachis_valida|AravalEVm021696t6;Arachis_hypogaea_SunOleic_97R|ArahypEVm015155t2;Arachis_stenosperma|ArasteEVm002718t3
cluster1269	3	Q6DBG8	GO:0006486; P:protein glycosylation; IEA:InterPro	Arachis_valida|AravalEVm011026t1;Valsten1|AravsEVm007337t3;Arachis_stenosperma|ArasteEVm007721t2
cluster1270	3	P53394	GO:0042391; P:regulation of membrane potential; IBA:GO_Central	Arachis_valida|AravalEVm002929t1;Arachis_hypogaea_Tifguard|ArahypEVm002180t1;Arachis_hypogaea_SunOleic_97R|ArahypEVm002180t1
cluster1271	3	Q9SDI4	GO:0009624; P:response to nematode; IEA:EnsemblPlants	Arachis_valida|AravalEVm008978t5;Arachis_stenosperma|ArasteEVm006360t2;Arachis_hypogaea_SunOleic_97R|ArahypEVm003454t4
cluster1272	3	Q03392	GO:0070914; P:UV-damage excision repair; IDA:PomBase	Arachis_valida|AravalEVm030516t1;Arachis_stenosperma|ArasteEVm020042t1;Arachis_hypogaea_SunOleic_97R|ArahypEVm015461t1
cluster1273	3	Q9C5D7	GO:0009809; P:lignin biosynthetic process; IEA:UniProtKB-KW	Arachis_valida|AravalEVm034649t1;Arachis_hypogaea_Tifguard|ArahypEVm017709t1;Arachis_hypogaea_SunOleic_97R|ArahypEVm017709t2
cluster1274	3	F4HW51	GO:1900049; P:regulation of histone exchange; IMP:TAIR	Arachis_valida|AravalEVm000294t3;Arachis_stenosperma|ArasteEVm001366t1;Arachis_hypogaea_SunOleic_97R|ArahypEVm000773t5
cluster1275	3	Q43497	GO:0016656; F:monodehydroascorbate reductase (NADH) activity; IEA:UniProtKB-EC	Arachis_valida|AravalEVm013968t3;Arachis_hypogaea_Tifguard|ArahypEVm008940t1;Arachis_hypogaea_SunOleic_97R|ArahypEVm008940t1
cluster1276	3	Q6R3K4	GO:0055085; P:transmembrane transport; IEA:InterPro	Arachis_hypogaea_Tifguard|ArahypEVm002009t2;Arachis_stenosperma|ArasteEVm003061t5;Arachis_hypogaea_SunOleic_97R|ArahypEVm002009t2
cluster1277	3	Q5NUF4	GO:0046287; P:isoflavonoid metabolic process; IDA:UniProtKB	Arachis_valida|AravalEVm022158t1;Arachis_hypogaea_Tifguard|ArahypEVm011978t1;Arachis_hypogaea_SunOleic_97R|ArahypEVm011978t1
cluster1278	3	Q70II3	GO:0048510; P:regulation of timing of transition from vegetative to reproductive phase; IMP:TAIR	Arachis_valida|AravalEVm021684t1;Arachis_hypogaea_Tifguard|ArahypEVm006025t2;Arachis_hypogaea_SunOleic_97R|ArahypEVm006025t2
cluster1279	3	P49776	GO:0015964; P:diadenosine triphosphate catabolic process; IDA:PomBase	Arachis_valida|AravalEVm043319t1;Arachis_hypogaea_Tifguard|ArahypEVm024557t1;Arachis_hypogaea_SunOleic_97R|ArahypEVm024557t1
cluster1280	3	N/A	N/A	Arachis_valida|AravalEVm043638t1;Arachis_hypogaea_Tifguard|ArahypEVm021268t1;Arachis_hypogaea_SunOleic_97R|ArahypEVm021268t1
cluster1281	3	P45954	GO:0006631; P:fatty acid metabolic process; TAS:ProtInc	Arachis_valida|AravalEVm013520t1;Arachis_stenosperma|ArasteEVm004035t3;Arachis_stenosperma|ArasteEVm004035t1
cluster1282	3	Q9LMU2	GO:0004866; F:endopeptidase inhibitor activity; IEA:InterPro	Arachis_valida|AravalEVm037062t1;Arachis_hypogaea_Tifguard|ArahypEVm017296t1;Arachis_hypogaea_SunOleic_97R|ArahypEVm017296t1
cluster1283	3	Q96TJ5	GO:0000027; P:ribosomal large subunit assembly; IBA:GO_Central	Arachis_valida|AravalEVm024155t1;Valsten1|AravsEVm016089t1;Arachis_stenosperma|ArasteEVm016199t2
cluster1284	3	Q4R5M2	GO:0046718; P:viral entry into host cell; IEA:Ensembl	Arachis_valida|AravalEVm021554t1;Valsten1|AravsEVm014531t1;Arachis_stenosperma|ArasteEVm014405t1
cluster1285	3	Q9FK47	GO:0003700; F:DNA-binding transcription factor activity; ISS:TAIR	Arachis_valida|AravalEVm031938t1;Arachis_hypogaea_Tifguard|ArahypEVm017335t1;Arachis_hypogaea_SunOleic_97R|ArahypEVm017335t1
cluster1286	3	P92512	GO:0005739; C:mitochondrion; IEA:UniProtKB-SubCell	Arachis_valida|AravalEVm023213t1;Arachis_stenosperma|ArasteEVm003552t4;Arachis_stenosperma|ArasteEVm003552t3
cluster1287	3	O24648	GO:0009686; P:gibberellin biosynthetic process; IDA:UniProtKB	Arachis_valida|AravalEVm018607t1;Valsten1|AravsEVm013368t1;Arachis_hypogaea_SunOleic_97R|ArahypEVm010747t1
cluster1288	3	N/A	N/A	Arachis_valida|AravalEVm090990t1;Valsten1|AravsEVm075810t2;Valsten1|AravsEVm075810t1
cluster1289	3	Q9SZ42	GO:0006636; P:unsaturated fatty acid biosynthetic process; IMP:TAIR	Arachis_valida|AravalEVm024633t1;Valsten1|AravsEVm016507t3;Arachis_hypogaea_SunOleic_97R|ArahypEVm013233t1
cluster1290	3	N/A	N/A	Arachis_valida|AravalEVm033478t1;Arachis_hypogaea_Tifguard|ArahypEVm018221t1;Arachis_hypogaea_SunOleic_97R|ArahypEVm018221t1
cluster1291	3	Q94JU2	GO:0022857; F:transmembrane transporter activity; IEA:InterPro	Arachis_valida|AravalEVm020220t1;Valsten1|AravsEVm013630t2;Arachis_hypogaea_SunOleic_97R|ArahypEVm010966t8
cluster1292	3	F4JFJ3	GO:0004386; F:helicase activity; IEA:UniProtKB-KW	Arachis_valida|AravalEVm004567t3;Arachis_hypogaea_Tifguard|ArahypEVm001265t4;Arachis_stenosperma|ArasteEVm001912t4
cluster1293	3	P0C8Q4	N/A	Arachis_valida|AravalEVm014304t1;Arachis_hypogaea_SunOleic_97R|ArahypEVm008093t2;Valsten1|AravsEVm010138t2
cluster1294	3	P15159	GO:0005509; F:calcium ion binding; IEA:InterPro	Arachis_valida|AravalEVm054090t1;Arachis_hypogaea_Tifguard|ArahypEVm023167t1;Arachis_hypogaea_SunOleic_97R|ArahypEVm023167t1
cluster1295	3	N/A	N/A	Arachis_valida|AravalEVm025611t1;Arachis_hypogaea_Tifguard|ArahypEVm013699t1;Arachis_hypogaea_SunOleic_97R|ArahypEVm013699t1
cluster1296	3	P36591	GO:0046654; P:tetrahydrofolate biosynthetic process; ISO:PomBase	Arachis_valida|AravalEVm033638t3;Arachis_hypogaea_Tifguard|ArahypEVm018590t1;Arachis_hypogaea_Tifguard|ArahypEVm018590t2
cluster1297	3	Q9ASS4	GO:0031348; P:negative regulation of defense response; IMP:TAIR	Arachis_valida|AravalEVm006117t2;Arachis_hypogaea_Tifguard|ArahypEVm002992t2;Arachis_hypogaea_SunOleic_97R|ArahypEVm002992t2
cluster1298	3	Q9ZUF7	N/A	Arachis_valida|AravalEVm031215t1;Valsten1|AravsEVm026117t2;Arachis_hypogaea_SunOleic_97R|ArahypEVm019468t1
cluster1299	3	N/A	N/A	Arachis_valida|AravalEVm040869t1;Valsten1|AravsEVm028378t1;Arachis_hypogaea_SunOleic_97R|ArahypEVm020460t2
cluster1300	3	Q9FKU8	GO:0016491; F:oxidoreductase activity; IEA:UniProtKB-KW	Arachis_valida|AravalEVm008966t1;Valsten1|AravsEVm006045t2;Valsten1|AravsEVm006045t1
cluster1301	3	Q9M153	GO:0016042; P:lipid catabolic process; IEA:UniProtKB-KW	Arachis_valida|AravalEVm017910t8;Arachis_hypogaea_Tifguard|ArahypEVm009739t2;Arachis_hypogaea_SunOleic_97R|ArahypEVm009739t2
cluster1302	3	Q93YU8	GO:1901698; P:response to nitrogen compound; IEP:TAIR	Arachis_valida|AravalEVm003556t2;Arachis_stenosperma|ArasteEVm001217t2;Arachis_hypogaea_SunOleic_97R|ArahypEVm001467t3
cluster1303	3	Q9C6S7	GO:0008168; F:methyltransferase activity; IEA:UniProtKB-KW	Arachis_valida|AravalEVm006632t3;Arachis_hypogaea_SunOleic_97R|ArahypEVm006694t1;Arachis_stenosperma|ArasteEVm004414t3
cluster1304	3	O22230	GO:0046686; P:response to cadmium ion; IEP:TAIR	Arachis_valida|AravalEVm031533t1;Arachis_hypogaea_Tifguard|ArahypEVm016190t3;Arachis_hypogaea_SunOleic_97R|ArahypEVm016190t3
cluster1305	3	Q9SF32	GO:0008017; F:microtubule binding; IDA:UniProtKB	Arachis_valida|AravalEVm025990t1;Valsten1|AravsEVm009137t2;Arachis_stenosperma|ArasteEVm016921t2
cluster1306	3	Q9FWQ2	GO:0005992; P:trehalose biosynthetic process; IDA:UniProtKB	Arachis_valida|AravalEVm018120t1;Arachis_hypogaea_SunOleic_97R|ArahypEVm010183t1;Arachis_hypogaea_SunOleic_97R|ArahypEVm010920t1
cluster1307	3	Q9SGQ6	N/A	Arachis_valida|AravalEVm005952t2;Arachis_hypogaea_Tifguard|ArahypEVm004017t4;Arachis_stenosperma|ArasteEVm002837t5
cluster1308	3	P49093	GO:0070981; P:L-asparagine biosynthetic process; IEA:UniProtKB-UniPathway	Arachis_valida|AravalEVm006936t2;Arachis_hypogaea_Tifguard|ArahypEVm009782t3;Arachis_hypogaea_SunOleic_97R|ArahypEVm009782t3
cluster1309	3	C0SVG5	GO:0009651; P:response to salt stress; IEP:TAIR	Arachis_valida|AravalEVm020394t2;Arachis_hypogaea_SunOleic_97R|ArahypEVm012032t14;Arachis_hypogaea_SunOleic_97R|ArahypEVm012032t13
cluster1310	3	Q01417	GO:0009793; P:embryo development ending in seed dormancy; IEA:InterPro	Arachis_valida|AravalEVm059958t1;Valsten1|AravsEVm044439t1;Arachis_stenosperma|ArasteEVm039598t1
cluster1311	3	Q0JNI9	GO:0006355; P:regulation of transcription, DNA-templated; IDA:UniProtKB	Arachis_stenosperma|ArasteEVm002757t3;Arachis_stenosperma|ArasteEVm002757t4;Arachis_hypogaea_SunOleic_97R|ArahypEVm007179t2
cluster1312	3	O42644	GO:0019856; P:pyrimidine nucleobase biosynthetic process; IBA:GO_Central	Arachis_valida|AravalEVm006905t1;Arachis_hypogaea_Tifguard|ArahypEVm003878t4;Arachis_stenosperma|ArasteEVm004498t2
cluster1313	3	Q9ZNS4	GO:0009611; P:response to wounding; IEP:UniProtKB	Arachis_valida|AravalEVm048578t1;Arachis_hypogaea_Tifguard|ArahypEVm024159t1;Arachis_hypogaea_SunOleic_97R|ArahypEVm023018t1
cluster1314	3	P0DKC7	GO:0006694; P:steroid biosynthetic process; IEA:UniProtKB-KW	Arachis_valida|AravalEVm023624t1;Valsten1|AravsEVm015909t8;Arachis_hypogaea_SunOleic_97R|ArahypEVm012748t13
cluster1315	3	N/A	N/A	Arachis_valida|AravalEVm056843t2;Arachis_stenosperma|ArasteEVm038723t1;Arachis_hypogaea_SunOleic_97R|ArahypEVm026584t2
cluster1316	3	N/A	N/A	Arachis_valida|AravalEVm057643t1;Arachis_hypogaea_Tifguard|ArahypEVm027284t2;Arachis_hypogaea_SunOleic_97R|ArahypEVm027284t2
cluster1317	3	F4JKH6	GO:0009737; P:response to abscisic acid; IDA:TAIR	Valsten1|AravsEVm000172t9;Arachis_hypogaea_Tifguard|ArahypEVm000500t4;Arachis_stenosperma|ArasteEVm000684t2
cluster1318	3	O82333	GO:0009733; P:response to auxin; IMP:TAIR	Arachis_valida|AravalEVm006394t1;Valsten1|AravsEVm004349t1;Arachis_hypogaea_SunOleic_97R|ArahypEVm003246t1
cluster1319	3	Q9ZUF4	GO:0006468; P:protein phosphorylation; IDA:UniProtKB	Arachis_valida|AravalEVm017782t1;Arachis_stenosperma|ArasteEVm011405t2;Arachis_hypogaea_SunOleic_97R|ArahypEVm008920t1
cluster1320	3	Q9SSA7	GO:0016042; P:lipid catabolic process; IEA:UniProtKB-KW	Arachis_valida|AravalEVm017862t1;Arachis_hypogaea_Tifguard|ArahypEVm009703t1;Arachis_hypogaea_SunOleic_97R|ArahypEVm009703t1
cluster1321	3	Q9LS46	GO:0015743; P:malate transport; IMP:TAIR	Arachis_valida|AravalEVm031695t1;Arachis_hypogaea_Tifguard|ArahypEVm008721t1;Arachis_hypogaea_SunOleic_97R|ArahypEVm008721t1
cluster1322	3	Q920A6	GO:0042573; P:retinoic acid metabolic process; IEP:RGD	Arachis_valida|AravalEVm012239t2;Arachis_hypogaea_Tifguard|ArahypEVm006770t3;Arachis_stenosperma|ArasteEVm008598t2
cluster1323	3	N/A	N/A	Arachis_valida|AravalEVm057266t1;Arachis_stenosperma|ArasteEVm025926t1;Arachis_hypogaea_SunOleic_97R|ArahypEVm023567t1
cluster1324	3	O04846	GO:0008270; F:zinc ion binding; IEA:InterPro	Arachis_valida|AravalEVm028914t1;Arachis_hypogaea_SunOleic_97R|ArahypEVm014624t2;Arachis_hypogaea_SunOleic_97R|ArahypEVm014624t1
cluster1325	3	Q8RWU5	GO:0006511; P:ubiquitin-dependent protein catabolic process; IBA:GO_Central	Arachis_valida|AravalEVm004644t1;Arachis_hypogaea_Tifguard|ArahypEVm005707t6;Arachis_hypogaea_SunOleic_97R|ArahypEVm005707t4
cluster1326	3	N/A	N/A	Arachis_valida|AravalEVm025492t1;Arachis_stenosperma|ArasteEVm026185t3;Arachis_stenosperma|ArasteEVm026185t1
cluster1327	3	O81832	GO:0048544; P:recognition of pollen; IEA:InterPro	Arachis_valida|AravalEVm002696t1;Arachis_hypogaea_Tifguard|ArahypEVm001184t5;Arachis_hypogaea_SunOleic_97R|ArahypEVm004950t2
cluster1328	3	O94464	GO:1990854; P:vacuole-ER tethering; ISO:PomBase	Arachis_valida|AravalEVm003041t2;Valsten1|AravsEVm002834t2;Arachis_hypogaea_SunOleic_97R|ArahypEVm003437t4
cluster1329	3	Q9ZWR8	GO:0102777; F:caffeoyl-CoA:pelargonidin-3,5-diglucoside 5-O-glucoside-6-O-hydroxycinnamoyltransferase activity; IEA:UniProtKB-EC	Valsten1|AravsEVm013685t1;Arachis_hypogaea_Tifguard|ArahypEVm005476t5;Arachis_hypogaea_SunOleic_97R|ArahypEVm005476t5
cluster1330	3	Q39224	GO:0010150; P:leaf senescence; IEP:TAIR	Arachis_valida|AravalEVm019287t1;Arachis_hypogaea_Tifguard|ArahypEVm010479t2;Arachis_hypogaea_SunOleic_97R|ArahypEVm010479t2
cluster1331	3	Q9SH30	GO:0046688; P:response to copper ion; IMP:TAIR	Arachis_valida|AravalEVm002285t1;Arachis_stenosperma|ArasteEVm001254t4;Arachis_hypogaea_SunOleic_97R|ArahypEVm000546t1
cluster1332	3	Q93ZR8	GO:0006486; P:protein glycosylation; IEA:UniProtKB-UniPathway	Arachis_valida|AravalEVm009067t2;Arachis_hypogaea_Tifguard|ArahypEVm004724t2;Valsten1|AravsEVm006104t2
cluster1333	3	P36908	GO:0000272; P:polysaccharide catabolic process; IEA:UniProtKB-KW	Arachis_valida|AravalEVm026189t1;Arachis_hypogaea_Tifguard|ArahypEVm013941t1;Arachis_hypogaea_SunOleic_97R|ArahypEVm013941t1
cluster1334	3	F4JKK0	GO:0010025; P:wax biosynthetic process; IMP:TAIR	Arachis_valida|AravalEVm034755t1;Arachis_hypogaea_Tifguard|ArahypEVm017765t3;Arachis_hypogaea_SunOleic_97R|ArahypEVm017765t3
cluster1335	3	N/A	N/A	Arachis_valida|AravalEVm006701t8;Arachis_hypogaea_Tifguard|ArahypEVm008611t1;Arachis_hypogaea_SunOleic_97R|ArahypEVm008611t8
cluster1336	3	P47154	GO:0019236; P:response to pheromone; IEA:UniProtKB-KW	Arachis_valida|AravalEVm010175t2;Arachis_hypogaea_Tifguard|ArahypEVm007806t3;Arachis_hypogaea_SunOleic_97R|ArahypEVm007806t3
cluster1337	3	N/A	N/A	Arachis_valida|AravalEVm089185t1;Valsten1|AravsEVm073525t2;Arachis_hypogaea_SunOleic_97R|ArahypEVm039628t1
cluster1338	3	F4I037	GO:0016413; F:O-acetyltransferase activity; IBA:GO_Central	Arachis_valida|AravalEVm012693t1;Valsten1|AravsEVm009332t4;Arachis_hypogaea_Tifguard|ArahypEVm007405t1
cluster1339	3	Q850K7	GO:0005576; C:extracellular region; IEA:UniProtKB-SubCell	Arachis_valida|AravalEVm031091t1;Valsten1|AravsEVm020684t1;Arachis_hypogaea_SunOleic_97R|ArahypEVm015639t2
cluster1340	3	N/A	N/A	Arachis_valida|AravalEVm064363t1;Valsten1|AravsEVm035700t1;Arachis_stenosperma|ArasteEVm029768t2
cluster1341	3	Q84TI7	GO:0006814; P:sodium ion transport; IMP:TAIR	Arachis_valida|AravalEVm009497t1;Arachis_hypogaea_Tifguard|ArahypEVm011006t1;Arachis_hypogaea_SunOleic_97R|ArahypEVm011006t1
cluster1342	3	P14133	GO:0008447; F:L-ascorbate oxidase activity; IEA:UniProtKB-EC	Arachis_valida|AravalEVm007248t1;Arachis_hypogaea_Tifguard|ArahypEVm003697t1;Arachis_hypogaea_SunOleic_97R|ArahypEVm003697t1
cluster1343	3	Q9STW3	GO:0090693; P:plant organ senescence; IEP:UniProtKB	Arachis_valida|AravalEVm037054t1;Arachis_stenosperma|ArasteEVm022160t1;Arachis_hypogaea_SunOleic_97R|ArahypEVm018526t1
cluster1344	3	B9DI20	GO:0006355; P:regulation of transcription, DNA-templated; TAS:TAIR	Arachis_valida|AravalEVm012999t1;Valsten1|AravsEVm000805t6;Valsten1|AravsEVm000805t5
cluster1345	3	P0C8Q4	N/A	Arachis_valida|AravalEVm014886t1;Valsten1|AravsEVm010080t1;Arachis_hypogaea_Tifguard|ArahypEVm008019t2
cluster1346	3	N/A	N/A	Arachis_valida|AravalEVm043619t1;Valsten1|AravsEVm030316t1;Arachis_hypogaea_Tifguard|ArahypEVm021190t1
cluster1347	3	P78972	GO:0045842; P:positive regulation of mitotic metaphase/anaphase transition; NAS:PomBase	Arachis_valida|AravalEVm015762t1;Arachis_stenosperma|ArasteEVm006618t1;Arachis_hypogaea_SunOleic_97R|ArahypEVm013564t1
cluster1348	3	Q9FNH6	GO:0009611; P:response to wounding; IEP:UniProtKB	Arachis_valida|AravalEVm034581t4;Arachis_hypogaea_Tifguard|ArahypEVm017684t1;Arachis_hypogaea_SunOleic_97R|ArahypEVm017684t1
cluster1349	3	Q9C7Z9	GO:0019748; P:secondary metabolic process; IBA:GO_Central	Arachis_valida|AravalEVm012029t2;Arachis_hypogaea_Tifguard|ArahypEVm005937t1;Arachis_hypogaea_SunOleic_97R|ArahypEVm005937t1
cluster1350	3	Q8VWJ2	GO:0042659; P:regulation of cell fate specification; IMP:TAIR	Arachis_valida|AravalEVm023276t1;Arachis_hypogaea_Tifguard|ArahypEVm016901t2;Arachis_hypogaea_SunOleic_97R|ArahypEVm016901t2
cluster1351	3	Q9SHC8	GO:0006605; P:protein targeting; IDA:UniProtKB	Arachis_valida|AravalEVm024941t2;Valsten1|AravsEVm016751t1;Arachis_hypogaea_SunOleic_97R|ArahypEVm017018t1
cluster1352	3	N/A	N/A	Arachis_valida|AravalEVm035583t1;Valsten1|AravsEVm023242t1;Arachis_stenosperma|ArasteEVm021332t1
cluster1353	3	Q9UUZ6	GO:0006414; P:translational elongation; IEA:InterPro	Arachis_valida|AravalEVm077301t3;Valsten1|AravsEVm059204t1;Arachis_stenosperma|ArasteEVm050720t1
cluster1354	3	Q8GUI6	GO:0006355; P:regulation of transcription, DNA-templated; TAS:TAIR	Arachis_valida|AravalEVm001117t2;Arachis_stenosperma|ArasteEVm000114t1;Arachis_hypogaea_Tifguard|ArahypEVm000531t2
cluster1355	3	P0CT64	GO:0042254; P:ribosome biogenesis; ISO:PomBase	Arachis_valida|AravalEVm079227t2;Valsten1|AravsEVm042158t1;Arachis_stenosperma|ArasteEVm037543t1
cluster1356	3	A9X1D0	GO:0045893; P:positive regulation of transcription, DNA-templated; ISS:UniProtKB	Arachis_valida|AravalEVm007912t5;Arachis_hypogaea_Tifguard|ArahypEVm004006t11;Arachis_hypogaea_SunOleic_97R|ArahypEVm004006t6
cluster1357	3	Q8W4K5	GO:0009733; P:response to auxin; IEP:TAIR	Arachis_valida|AravalEVm012226t2;Arachis_stenosperma|ArasteEVm007770t3;Arachis_hypogaea_SunOleic_97R|ArahypEVm006532t7
cluster1358	3	N/A	N/A	Arachis_valida|AravalEVm013708t3;Valsten1|AravsEVm009270t6;Arachis_stenosperma|ArasteEVm009594t2
cluster1359	3	Q9SK55	GO:0005992; P:trehalose biosynthetic process; IMP:TAIR	Arachis_valida|AravalEVm021991t1;Arachis_hypogaea_Tifguard|ArahypEVm010621t1;Arachis_hypogaea_SunOleic_97R|ArahypEVm010621t1
cluster1360	3	N/A	N/A	Arachis_valida|AravalEVm038660t1;Arachis_hypogaea_Tifguard|ArahypEVm028858t1;Arachis_stenosperma|ArasteEVm038986t1
cluster1361	3	Q700D9	GO:0006355; P:regulation of transcription, DNA-templated; TAS:TAIR	Arachis_valida|AravalEVm026052t1;Valsten1|AravsEVm033161t3;Arachis_hypogaea_SunOleic_97R|ArahypEVm012121t2
cluster1362	3	Q40392	GO:0007165; P:signal transduction; IEA:InterPro	Arachis_valida|AravalEVm034772t1;Arachis_hypogaea_Tifguard|ArahypEVm017791t1;Arachis_hypogaea_SunOleic_97R|ArahypEVm017791t1
cluster1363	3	O43125	GO:0030036; P:actin cytoskeleton organization; ISO:PomBase	Arachis_valida|AravalEVm029551t1;Arachis_stenosperma|ArasteEVm003440t1;Arachis_stenosperma|ArasteEVm006805t1
cluster1364	3	P13917	GO:0006508; P:proteolysis; IBA:GO_Central	Arachis_valida|AravalEVm014676t1;Arachis_stenosperma|ArasteEVm009993t2;Arachis_hypogaea_SunOleic_97R|ArahypEVm007458t3
cluster1365	3	Q9FIK8	GO:0043547; P:positive regulation of GTPase activity; ISS:UniProtKB	Arachis_valida|AravalEVm048908t1;Arachis_hypogaea_Tifguard|ArahypEVm019719t1;Arachis_stenosperma|ArasteEVm007946t1
cluster1366	3	Q8VYG0	GO:0046777; P:protein autophosphorylation; IDA:TAIR	Arachis_valida|AravalEVm005704t4;Arachis_hypogaea_Tifguard|ArahypEVm002845t7;Arachis_hypogaea_SunOleic_97R|ArahypEVm002845t7
cluster1367	3	Q15042	GO:0048172; P:regulation of short-term neuronal synaptic plasticity; ISS:ParkinsonsUK-UCL	Valsten1|AravsEVm002967t2;Valsten1|AravsEVm002967t3;Arachis_stenosperma|ArasteEVm003204t2
cluster1368	3	P0A9H8	GO:0006633; P:fatty acid biosynthetic process; IEA:UniProtKB-UniPathway	Valsten1|AravsEVm036010t2;Valsten1|AravsEVm036010t1;Arachis_stenosperma|ArasteEVm001671t5
cluster1369	3	Q949Z1	GO:0009831; P:plant-type cell wall modification involved in multidimensional cell growth; IMP:TAIR	Valsten1|AravsEVm007408t2;Valsten1|AravsEVm007408t4;Arachis_hypogaea_SunOleic_97R|ArahypEVm012007t1
cluster1370	3	F4HZB2	GO:0007033; P:vacuole organization; IMP:TAIR	Valsten1|AravsEVm000010t5;Valsten1|AravsEVm000010t1;Arachis_stenosperma|ArasteEVm001751t1
cluster1371	3	N/A	N/A	Valsten1|AravsEVm043567t2;Valsten1|AravsEVm043567t1;Arachis_hypogaea_SunOleic_97R|ArahypEVm026722t3
cluster1372	3	P33081	GO:0009734; P:auxin-activated signaling pathway; IEA:UniProtKB-KW	Valsten1|AravsEVm071215t2;Valsten1|AravsEVm071185t1;Valsten1|AravsEVm071215t1
cluster1373	3	P51069	GO:0009058; P:biosynthetic process; IEA:InterPro	Arachis_hypogaea_Tifguard|ArahypEVm009157t1;Arachis_hypogaea_Tifguard|ArahypEVm009157t2;Arachis_hypogaea_SunOleic_97R|ArahypEVm009157t1
cluster1374	3	Q0J0A4	GO:0008654; P:phospholipid biosynthetic process; IEA:UniProtKB-KW	Arachis_hypogaea_Tifguard|ArahypEVm011131t1;Arachis_hypogaea_Tifguard|ArahypEVm011131t2;Arachis_hypogaea_SunOleic_97R|ArahypEVm011131t3
cluster1375	3	O22243	GO:0003723; F:RNA binding; IBA:GO_Central	Arachis_hypogaea_Tifguard|ArahypEVm000480t2;Arachis_hypogaea_Tifguard|ArahypEVm000480t4;Arachis_hypogaea_SunOleic_97R|ArahypEVm000480t2
cluster1376	3	Q9C519	GO:0010200; P:response to chitin; IEP:TAIR	Arachis_hypogaea_Tifguard|ArahypEVm012869t2;Arachis_hypogaea_Tifguard|ArahypEVm012869t1;Arachis_hypogaea_SunOleic_97R|ArahypEVm012869t2
cluster1377	3	C0SVV6	GO:0080142; P:regulation of salicylic acid biosynthetic process; IBA:GO_Central	Arachis_hypogaea_Tifguard|ArahypEVm010975t2;Arachis_hypogaea_Tifguard|ArahypEVm010975t1;Arachis_hypogaea_Tifguard|ArahypEVm010975t4
cluster1378	3	P93194	GO:0006468; P:protein phosphorylation; NAS:UniProtKB	Arachis_hypogaea_Tifguard|ArahypEVm000254t7;Arachis_hypogaea_Tifguard|ArahypEVm000254t10;Arachis_hypogaea_SunOleic_97R|ArahypEVm000254t7
cluster1379	3	Q837V0	GO:0006396; P:RNA processing; IEA:InterPro	Arachis_hypogaea_Tifguard|ArahypEVm004985t4;Arachis_hypogaea_Tifguard|ArahypEVm004985t1;Arachis_hypogaea_SunOleic_97R|ArahypEVm004985t7
cluster1380	3	Q8GW31	GO:0010072; P:primary shoot apical meristem specification; IMP:UniProtKB	Arachis_hypogaea_Tifguard|ArahypEVm012406t5;Arachis_hypogaea_Tifguard|ArahypEVm012406t6;Arachis_stenosperma|ArasteEVm015629t3
cluster1381	3	Q56YN8	GO:0007062; P:sister chromatid cohesion; IMP:TAIR	Arachis_hypogaea_Tifguard|ArahypEVm000180t4;Arachis_hypogaea_Tifguard|ArahypEVm000180t5;Arachis_stenosperma|ArasteEVm000501t2
cluster1382	3	B8ANX9	GO:0003677; F:DNA binding; IEA:UniProtKB-KW	Arachis_hypogaea_Tifguard|ArahypEVm014411t3;Arachis_hypogaea_Tifguard|ArahypEVm014411t1;Arachis_hypogaea_Tifguard|ArahypEVm014411t4
cluster1383	3	Q9P260	GO:0032367; P:intracellular cholesterol transport; IDA:UniProtKB	Arachis_hypogaea_Tifguard|ArahypEVm000231t1;Arachis_hypogaea_Tifguard|ArahypEVm000231t2;Arachis_hypogaea_SunOleic_97R|ArahypEVm000231t1
cluster1384	3	N/A	N/A	Arachis_hypogaea_Tifguard|ArahypEVm009884t5;Arachis_hypogaea_Tifguard|ArahypEVm009884t2;Arachis_hypogaea_SunOleic_97R|ArahypEVm009884t5
cluster1385	3	N/A	N/A	Arachis_hypogaea_Tifguard|ArahypEVm017569t6;Arachis_hypogaea_Tifguard|ArahypEVm017569t1;Arachis_hypogaea_Tifguard|ArahypEVm017569t4
cluster1386	3	Q40392	GO:0007165; P:signal transduction; IEA:InterPro	Arachis_hypogaea_Tifguard|ArahypEVm000391t7;Arachis_hypogaea_Tifguard|ArahypEVm000391t8;Arachis_hypogaea_SunOleic_97R|ArahypEVm000391t7
cluster1387	3	P09189	GO:0005524; F:ATP binding; IEA:UniProtKB-KW	Arachis_hypogaea_Tifguard|ArahypEVm002355t1;Arachis_hypogaea_Tifguard|ArahypEVm002355t8;Arachis_hypogaea_SunOleic_97R|ArahypEVm002355t8
cluster1388	3	N/A	N/A	Arachis_stenosperma|ArasteEVm000185t4;Arachis_stenosperma|ArasteEVm000263t2;Arachis_stenosperma|ArasteEVm000346t2
cluster1389	3	O80462	GO:0007188; P:adenylate cyclase-modulating G protein-coupled receptor signaling pathway; IBA:GO_Central	Arachis_stenosperma|ArasteEVm011690t5;Arachis_stenosperma|ArasteEVm001690t2;Arachis_stenosperma|ArasteEVm011690t1
cluster1390	3	Q05609	GO:0010182; P:sugar mediated signaling pathway; TAS:TAIR	Arachis_stenosperma|ArasteEVm005739t4;Arachis_stenosperma|ArasteEVm001911t8;Arachis_hypogaea_SunOleic_97R|ArahypEVm002704t3
cluster1391	3	Q9CY58	GO:0042981; P:regulation of apoptotic process; IEA:Ensembl	Arachis_stenosperma|ArasteEVm008685t5;Arachis_stenosperma|ArasteEVm008685t2;Arachis_stenosperma|ArasteEVm008685t4
cluster1392	3	Q96JG6	GO:0015031; P:protein transport; IEA:UniProtKB-KW	Arachis_stenosperma|ArasteEVm000706t8;Arachis_stenosperma|ArasteEVm000706t1;Arachis_stenosperma|ArasteEVm000706t5
cluster1393	3	N/A	N/A	Arachis_stenosperma|ArasteEVm005159t3;Arachis_stenosperma|ArasteEVm005159t2;Arachis_hypogaea_SunOleic_97R|ArahypEVm005833t1
cluster1394	3	Q8LGJ5	GO:0001666; P:response to hypoxia; IMP:TAIR	Arachis_stenosperma|ArasteEVm019248t3;Arachis_stenosperma|ArasteEVm019248t1;Arachis_stenosperma|ArasteEVm019248t2
cluster1395	3	Q9LZX8	GO:0016192; P:vesicle-mediated transport; IBA:GO_Central	Arachis_stenosperma|ArasteEVm000125t4;Arachis_stenosperma|ArasteEVm000125t3;Arachis_stenosperma|ArasteEVm000800t7
cluster1396	3	F4JSZ5	GO:0016192; P:vesicle-mediated transport; IBA:GO_Central	Arachis_stenosperma|ArasteEVm000800t3;Arachis_stenosperma|ArasteEVm000800t9;Arachis_stenosperma|ArasteEVm000800t5
cluster1397	3	Q9LRR4	GO:0006952; P:defense response; IEA:UniProtKB-KW	Arachis_stenosperma|ArasteEVm009302t1;Arachis_stenosperma|ArasteEVm009302t6;Arachis_stenosperma|ArasteEVm009302t9
cluster1398	3	Q9FR37	GO:0009684; P:indoleacetic acid biosynthetic process; IDA:TAIR	Arachis_stenosperma|ArasteEVm009525t4;Arachis_stenosperma|ArasteEVm009525t3;Arachis_hypogaea_Tifguard|ArahypEVm003239t4
cluster1399	3	N/A	N/A	Arachis_stenosperma|ArasteEVm000059t3;Arachis_stenosperma|ArasteEVm000059t2;Arachis_hypogaea_SunOleic_97R|ArahypEVm023498t1
cluster1400	3	N/A	N/A	Arachis_stenosperma|ArasteEVm007348t1;Arachis_stenosperma|ArasteEVm001914t2;Arachis_stenosperma|ArasteEVm007348t2
cluster1401	3	N/A	N/A	Arachis_stenosperma|ArasteEVm013547t4;Arachis_stenosperma|ArasteEVm013547t3;Arachis_stenosperma|ArasteEVm013547t8
cluster1402	3	Q9FNC7	GO:0080188; P:RNA-directed DNA methylation; IDA:UniProtKB	Arachis_stenosperma|ArasteEVm002667t2;Arachis_stenosperma|ArasteEVm002667t4;Valsten1|AravsEVm002457t5
cluster1403	3	Q9W0K4	GO:0006351; P:transcription, DNA-templated; TAS:UniProtKB	Arachis_stenosperma|ArasteEVm004009t1;Arachis_stenosperma|ArasteEVm002563t1;Arachis_stenosperma|ArasteEVm006646t1
cluster1404	3	A2YQ93	GO:0048511; P:rhythmic process; IEA:UniProtKB-KW	Arachis_stenosperma|ArasteEVm002255t5;Arachis_stenosperma|ArasteEVm002255t3;Arachis_hypogaea_SunOleic_97R|ArahypEVm002327t10
cluster1405	3	Q5XGB9	GO:0008235; F:metalloexopeptidase activity; IEA:InterPro	Arachis_stenosperma|ArasteEVm006892t1;Arachis_stenosperma|ArasteEVm006169t1;Arachis_hypogaea_SunOleic_97R|ArahypEVm020524t2
cluster1406	3	A8MS85	GO:0006368; P:transcription elongation from RNA polymerase II promoter; IBA:GO_Central	Arachis_stenosperma|ArasteEVm000170t2;Arachis_stenosperma|ArasteEVm000170t4;Valsten1|AravsEVm000188t4
cluster1407	3	Q9SYP1	GO:0010228; P:vegetative to reproductive phase transition of meristem; IMP:TAIR	Arachis_stenosperma|ArasteEVm000055t3;Arachis_stenosperma|ArasteEVm000228t4;Arachis_stenosperma|ArasteEVm005648t1
cluster1408	3	Q940K0	GO:0006952; P:defense response; IBA:GO_Central	Arachis_stenosperma|ArasteEVm000105t7;Arachis_stenosperma|ArasteEVm000105t3;Arachis_stenosperma|ArasteEVm000105t6
cluster1409	3	Q8GUL2	GO:0043484; P:regulation of RNA splicing; IMP:TAIR	Arachis_stenosperma|ArasteEVm001186t9;Arachis_stenosperma|ArasteEVm001186t1;Arachis_stenosperma|ArasteEVm001186t4
cluster1410	3	Q6ZN66	GO:0006955; P:immune response; ISS:UniProtKB	Arachis_stenosperma|ArasteEVm000806t4;Arachis_stenosperma|ArasteEVm000806t2;Arachis_stenosperma|ArasteEVm000806t3
cluster1411	3	Q9S9M5	GO:0007166; P:cell surface receptor signaling pathway; IBA:GO_Central	Arachis_stenosperma|ArasteEVm002210t3;Arachis_stenosperma|ArasteEVm002210t1;Arachis_hypogaea_SunOleic_97R|ArahypEVm001555t1
cluster1412	3	Q7XA42	GO:0006952; P:defense response; IEA:UniProtKB-KW	Arachis_stenosperma|ArasteEVm028946t4;Arachis_stenosperma|ArasteEVm029450t1;Arachis_stenosperma|ArasteEVm029450t2
cluster1413	3	Q8W4S6	GO:0005975; P:carbohydrate metabolic process; IEA:InterPro	Arachis_stenosperma|ArasteEVm005010t2;Arachis_stenosperma|ArasteEVm005010t4;Arachis_stenosperma|ArasteEVm005010t8
cluster1414	3	Q9LRR4	GO:0006952; P:defense response; IEA:UniProtKB-KW	Arachis_stenosperma|ArasteEVm018876t3;Arachis_stenosperma|ArasteEVm018876t1;Arachis_stenosperma|ArasteEVm018876t2
cluster1415	3	Q7XV21	GO:0043067; P:regulation of programmed cell death; IMP:UniProtKB	Arachis_stenosperma|ArasteEVm003605t1;Arachis_stenosperma|ArasteEVm004038t3;Arachis_stenosperma|ArasteEVm004038t5
cluster1416	3	Q9FJH9	GO:0010264; P:myo-inositol hexakisphosphate biosynthetic process; IMP:TAIR	Arachis_stenosperma|ArasteEVm002280t2;Arachis_stenosperma|ArasteEVm002280t4;Arachis_valida|AravalEVm003027t3
cluster1417	3	Q2PGG3	GO:0009069; P:serine family amino acid metabolic process; IDA:TAIR	Arachis_stenosperma|ArasteEVm014798t4;Arachis_stenosperma|ArasteEVm014798t3;Arachis_stenosperma|ArasteEVm014798t5
cluster1418	3	Q9LET7	GO:0005516; F:calmodulin binding; IDA:TAIR	Arachis_stenosperma|ArasteEVm000827t3;Arachis_stenosperma|ArasteEVm000827t2;Arachis_hypogaea_SunOleic_97R|ArahypEVm001101t9
cluster1419	3	F4JCC1	GO:0000398; P:mRNA splicing, via spliceosome; IBA:GO_Central	Arachis_stenosperma|ArasteEVm000894t5;Arachis_stenosperma|ArasteEVm000894t3;Arachis_hypogaea_SunOleic_97R|ArahypEVm005137t5
cluster1420	3	F4IIM1	GO:0009414; P:response to water deprivation; IMP:UniProtKB	Arachis_stenosperma|ArasteEVm000058t1;Arachis_stenosperma|ArasteEVm000058t6;Arachis_stenosperma|ArasteEVm017235t1
cluster1421	3	A7J1T2	GO:0046777; P:protein autophosphorylation; IEA:InterPro	Arachis_stenosperma|ArasteEVm000204t3;Arachis_stenosperma|ArasteEVm000435t1;Arachis_hypogaea_Tifguard|ArahypEVm001024t2
cluster1422	3	N/A	N/A	Arachis_hypogaea_SunOleic_97R|ArahypEVm009706t9;Arachis_hypogaea_SunOleic_97R|ArahypEVm009706t6;Arachis_hypogaea_Tifguard|ArahypEVm009706t10
cluster1423	3	Q0WVU3	GO:0006355; P:regulation of transcription, DNA-templated; TAS:TAIR	Arachis_hypogaea_SunOleic_97R|ArahypEVm011147t1;Arachis_hypogaea_SunOleic_97R|ArahypEVm011147t2;Arachis_hypogaea_SunOleic_97R|ArahypEVm011147t4
cluster1424	3	Q7XJU2	GO:0046983; F:protein dimerization activity; IEA:InterPro	Arachis_hypogaea_SunOleic_97R|ArahypEVm022970t1;Arachis_hypogaea_SunOleic_97R|ArahypEVm022974t1;Arachis_valida|AravalEVm016009t2
cluster1425	3	F4KD71	GO:0071918; P:urea transmembrane transport; IDA:UniProtKB	Arachis_hypogaea_SunOleic_97R|ArahypEVm001894t3;Arachis_hypogaea_SunOleic_97R|ArahypEVm001894t2;Arachis_stenosperma|ArasteEVm002966t1
cluster1426	3	Q9LIE6	GO:0005634; C:nucleus; IEA:UniProtKB-SubCell	Arachis_hypogaea_SunOleic_97R|ArahypEVm010589t2;Arachis_hypogaea_SunOleic_97R|ArahypEVm010589t1;Arachis_hypogaea_SunOleic_97R|ArahypEVm010589t4
cluster1427	3	O80668	GO:0003333; P:amino acid transmembrane transport; IBA:GO_Central	Arachis_hypogaea_SunOleic_97R|ArahypEVm009736t3;Arachis_hypogaea_SunOleic_97R|ArahypEVm009736t2;Arachis_stenosperma|ArasteEVm006489t2
cluster1428	3	Q9S586	GO:0046295; P:glycolate biosynthetic process; IEA:UniProtKB-UniPathway	Arachis_hypogaea_SunOleic_97R|ArahypEVm014703t4;Arachis_hypogaea_SunOleic_97R|ArahypEVm014703t1;Arachis_hypogaea_SunOleic_97R|ArahypEVm014703t3
cluster1429	3	N/A	N/A	Arachis_hypogaea_SunOleic_97R|ArahypEVm024158t1;Arachis_hypogaea_SunOleic_97R|ArahypEVm024158t2;Arachis_hypogaea_SunOleic_97R|ArahypEVm024158t5
cluster1430	3	Q9LFD1	GO:0046274; P:lignin catabolic process; IEA:UniProtKB-KW	Arachis_hypogaea_SunOleic_97R|ArahypEVm010419t3;Arachis_hypogaea_SunOleic_97R|ArahypEVm010419t2;Arachis_stenosperma|ArasteEVm012569t1
cluster1431	3	Q9CAL2	GO:0046777; P:protein autophosphorylation; IBA:GO_Central	Arachis_hypogaea_SunOleic_97R|ArahypEVm002280t1;Arachis_hypogaea_SunOleic_97R|ArahypEVm002280t2;Arachis_hypogaea_SunOleic_97R|ArahypEVm002280t3
cluster1432	3	Q9LD43	GO:2001295; P:malonyl-CoA biosynthetic process; IEA:UniProtKB-UniPathway	Arachis_hypogaea_SunOleic_97R|ArahypEVm001736t4;Arachis_hypogaea_SunOleic_97R|ArahypEVm001736t7;Arachis_hypogaea_SunOleic_97R|ArahypEVm001736t8
cluster1433	3	N/A	N/A	Arachis_hypogaea_SunOleic_97R|ArahypEVm007545t2;Arachis_hypogaea_SunOleic_97R|ArahypEVm007545t1;Arachis_hypogaea_SunOleic_97R|ArahypEVm007545t5
cluster1434	3	Q9FHB6	GO:0009624; P:response to nematode; IEP:TAIR	Arachis_hypogaea_SunOleic_97R|ArahypEVm005618t8;Arachis_hypogaea_SunOleic_97R|ArahypEVm005618t9;Arachis_hypogaea_SunOleic_97R|ArahypEVm005618t10
cluster1435	3	Q94G86	GO:0006076; P:(1->3)-beta-D-glucan catabolic process; IDA:UniProtKB	Arachis_hypogaea_SunOleic_97R|ArahypEVm007500t1;Arachis_hypogaea_SunOleic_97R|ArahypEVm007500t2;Arachis_hypogaea_SunOleic_97R|ArahypEVm007500t3
cluster1436	3	N/A	N/A	Arachis_hypogaea_SunOleic_97R|ArahypEVm016033t6;Arachis_hypogaea_SunOleic_97R|ArahypEVm016033t5;Arachis_hypogaea_SunOleic_97R|ArahypEVm016033t3
cluster1437	3	Q9LYM2	GO:0003333; P:amino acid transmembrane transport; IBA:GO_Central	Arachis_hypogaea_SunOleic_97R|ArahypEVm007230t3;Arachis_hypogaea_SunOleic_97R|ArahypEVm007230t1;Valsten1|AravsEVm009113t5
cluster1438	3	K4BIZ9	GO:0009751; P:response to salicylic acid; IEP:UniProtKB	Arachis_hypogaea_SunOleic_97R|ArahypEVm012741t3;Arachis_hypogaea_SunOleic_97R|ArahypEVm012741t1;Arachis_hypogaea_SunOleic_97R|ArahypEVm012741t4
cluster1439	3	Q9LEH3	GO:0006979; P:response to oxidative stress; IEA:InterPro	Arachis_hypogaea_SunOleic_97R|ArahypEVm010678t2;Arachis_hypogaea_SunOleic_97R|ArahypEVm010643t8;Arachis_hypogaea_SunOleic_97R|ArahypEVm010643t6
cluster1440	3	A0AT28	GO:0006869; P:lipid transport; IEA:InterPro	Arachis_hypogaea_SunOleic_97R|ArahypEVm029278t1;Arachis_hypogaea_SunOleic_97R|ArahypEVm032347t1;Arachis_hypogaea_SunOleic_97R|ArahypEVm032347t2
cluster1441	3	N/A	N/A	Arachis_hypogaea_SunOleic_97R|ArahypEVm006636t2;Arachis_hypogaea_SunOleic_97R|ArahypEVm003969t4;Arachis_hypogaea_SunOleic_97R|ArahypEVm006636t1
cluster1442	3	F4JN26	GO:0007131; P:reciprocal meiotic recombination; IMP:TAIR	Arachis_hypogaea_SunOleic_97R|ArahypEVm001174t6;Arachis_hypogaea_SunOleic_97R|ArahypEVm001174t5;Arachis_hypogaea_SunOleic_97R|ArahypEVm001174t7
cluster1443	3	N/A	N/A	Arachis_hypogaea_SunOleic_97R|ArahypEVm013200t2;Arachis_hypogaea_SunOleic_97R|ArahypEVm013200t3;Arachis_hypogaea_SunOleic_97R|ArahypEVm013200t4
cluster1444	3	Q6TEN6	GO:0043551; P:regulation of phosphatidylinositol 3-kinase activity; ISS:UniProtKB	Arachis_hypogaea_SunOleic_97R|ArahypEVm002596t10;Arachis_hypogaea_SunOleic_97R|ArahypEVm002596t3;Arachis_stenosperma|ArasteEVm008536t6
cluster1445	3	Q84TG3	GO:0009414; P:response to water deprivation; IMP:TAIR	Arachis_hypogaea_SunOleic_97R|ArahypEVm007812t1;Arachis_hypogaea_SunOleic_97R|ArahypEVm007962t1;Arachis_valida|AravalEVm015426t1
cluster1446	3	Q64M78	GO:0003723; F:RNA binding; IEA:UniProtKB-KW	Arachis_hypogaea_SunOleic_97R|ArahypEVm003067t1;Arachis_hypogaea_SunOleic_97R|ArahypEVm001001t2;Arachis_hypogaea_SunOleic_97R|ArahypEVm003067t3
cluster1447	3	Q39366	GO:0046872; F:metal ion binding; IEA:UniProtKB-KW	Arachis_hypogaea_SunOleic_97R|ArahypEVm013051t3;Arachis_hypogaea_SunOleic_97R|ArahypEVm011793t4;Valsten1|AravsEVm016897t4
cluster1448	3	Q3E9B8	GO:0055085; P:transmembrane transport; IBA:GO_Central	Arachis_hypogaea_SunOleic_97R|ArahypEVm002853t2;Arachis_hypogaea_SunOleic_97R|ArahypEVm002853t1;Arachis_hypogaea_SunOleic_97R|ArahypEVm002853t3
cluster1449	3	Q5BCG1	GO:0000103; P:sulfate assimilation; IBA:GO_Central	Arachis_valida|AravalEVm016080t1;Arachis_valida|AravalEVm019794t1;Arachis_stenosperma|ArasteEVm010339t2
cluster1450	3	O95696	GO:0035902; P:response to immobilization stress; IEA:Ensembl	Valsten1|AravsEVm003325t2;Arachis_hypogaea_Tifguard|ArahypEVm004601t14;Arachis_hypogaea_SunOleic_97R|ArahypEVm004601t14
cluster1451	3	Q8LBA0	GO:0010200; P:response to chitin; IEP:TAIR	Valsten1|AravsEVm026562t1;Arachis_hypogaea_Tifguard|ArahypEVm017848t1;Arachis_hypogaea_SunOleic_97R|ArahypEVm017848t1
cluster1452	3	N/A	N/A	Valsten1|AravsEVm000691t3;Arachis_stenosperma|ArasteEVm000310t2;Arachis_hypogaea_SunOleic_97R|ArahypEVm000899t3
cluster1453	3	Q40392	GO:0007165; P:signal transduction; IEA:InterPro	Valsten1|AravsEVm019915t1;Arachis_stenosperma|ArasteEVm012962t4;Arachis_hypogaea_SunOleic_97R|ArahypEVm000405t6
cluster1454	3	N/A	N/A	Valsten1|AravsEVm007808t4;Arachis_hypogaea_Tifguard|ArahypEVm006146t1;Arachis_hypogaea_SunOleic_97R|ArahypEVm006146t1
cluster1455	3	Q949Z1	GO:0009831; P:plant-type cell wall modification involved in multidimensional cell growth; IMP:TAIR	Valsten1|AravsEVm008814t1;Arachis_hypogaea_SunOleic_97R|ArahypEVm009456t6;Arachis_valida|AravalEVm012994t3
cluster1456	3	Q8RX56	GO:0010118; P:stomatal movement; IMP:TAIR	Valsten1|AravsEVm001236t1;Arachis_hypogaea_SunOleic_97R|ArahypEVm014584t1;Arachis_valida|AravalEVm002450t1
cluster1457	3	F4IF36	GO:0009408; P:response to heat; IDA:UniProtKB	Valsten1|AravsEVm000345t4;Arachis_hypogaea_Tifguard|ArahypEVm000148t3;Arachis_stenosperma|ArasteEVm000381t4
cluster1458	3	N/A	N/A	Valsten1|AravsEVm033794t1;Arachis_hypogaea_Tifguard|ArahypEVm023521t1;Arachis_hypogaea_SunOleic_97R|ArahypEVm023521t1
cluster1459	3	Q9C6A1	GO:0000394; P:RNA splicing, via endonucleolytic cleavage and ligation; IMP:TAIR	Valsten1|AravsEVm011673t8;Arachis_hypogaea_Tifguard|ArahypEVm009124t5;Arachis_hypogaea_SunOleic_97R|ArahypEVm010090t2
cluster1460	3	N/A	N/A	Valsten1|AravsEVm007081t3;Arachis_stenosperma|ArasteEVm010813t3;Arachis_hypogaea_SunOleic_97R|ArahypEVm002825t3
cluster1461	3	N/A	N/A	Valsten1|AravsEVm014190t3;Arachis_valida|AravalEVm022369t2;Arachis_stenosperma|ArasteEVm010964t1
cluster1462	3	Q944L3	GO:0006355; P:regulation of transcription, DNA-templated; TAS:TAIR	Valsten1|AravsEVm010112t1;Arachis_stenosperma|ArasteEVm017667t5;Arachis_hypogaea_SunOleic_97R|ArahypEVm009393t4
cluster1463	3	Q80Y75	GO:0051085; P:chaperone cofactor-dependent protein refolding; IBA:GO_Central	Valsten1|AravsEVm015363t2;Arachis_stenosperma|ArasteEVm014001t2;Arachis_valida|AravalEVm020773t1
cluster1464	3	P09886	GO:0009507; C:chloroplast; IEA:UniProtKB-SubCell	Arachis_hypogaea_Tifguard|ArahypEVm017206t3;Arachis_stenosperma|ArasteEVm022250t1;Arachis_hypogaea_SunOleic_97R|ArahypEVm019426t3
cluster1465	3	N/A	N/A	Valsten1|AravsEVm036343t2;Arachis_hypogaea_Tifguard|ArahypEVm019675t1;Arachis_hypogaea_SunOleic_97R|ArahypEVm019675t1
cluster1466	3	N/A	N/A	Valsten1|AravsEVm009647t3;Arachis_stenosperma|ArasteEVm009972t4;Arachis_valida|AravalEVm014830t2
cluster1467	3	Q9LVJ1	GO:0010223; P:secondary shoot formation; IMP:TAIR	Valsten1|AravsEVm002063t2;Arachis_stenosperma|ArasteEVm002281t2;Arachis_valida|AravalEVm003126t2
cluster1468	3	Q8L785	GO:0045995; P:regulation of embryonic development; IMP:TAIR	Valsten1|AravsEVm000698t4;Arachis_stenosperma|ArasteEVm001644t2;Arachis_hypogaea_SunOleic_97R|ArahypEVm009858t1
cluster1469	3	D5LXJ0	GO:0009877; P:nodulation; IMP:UniProtKB	Valsten1|AravsEVm001199t5;Arachis_stenosperma|ArasteEVm001363t2;Arachis_hypogaea_SunOleic_97R|ArahypEVm004349t10
cluster1470	3	Q8RUN2	GO:0009691; P:cytokinin biosynthetic process; IBA:GO_Central	Valsten1|AravsEVm024587t3;Arachis_stenosperma|ArasteEVm024222t2;Arachis_valida|AravalEVm037250t1
cluster1471	3	N/A	N/A	Valsten1|AravsEVm033794t3;Arachis_hypogaea_Tifguard|ArahypEVm024147t1;Arachis_hypogaea_SunOleic_97R|ArahypEVm024147t1
cluster1472	3	O48832	GO:0009414; P:response to water deprivation; IEP:TAIR	Valsten1|AravsEVm007992t4;Arachis_hypogaea_SunOleic_97R|ArahypEVm009511t1;Arachis_valida|AravalEVm017487t2
cluster1473	3	N/A	N/A	Valsten1|AravsEVm005367t5;Arachis_hypogaea_Tifguard|ArahypEVm008226t1;Arachis_hypogaea_SunOleic_97R|ArahypEVm008226t1
cluster1474	3	Q93V99	GO:0009845; P:seed germination; IMP:TAIR	Arachis_hypogaea_SunOleic_97R|ArahypEVm001751t1;Arachis_stenosperma|ArasteEVm004714t1;Arachis_valida|AravalEVm003767t1
cluster1475	3	C0LGJ1	GO:0009845; P:seed germination; IMP:TAIR	Valsten1|AravsEVm000649t5;Arachis_hypogaea_Tifguard|ArahypEVm001988t1;Arachis_hypogaea_SunOleic_97R|ArahypEVm001988t1
cluster1476	3	Q39214	GO:0009626; P:plant-type hypersensitive response; IDA:TAIR	Arachis_stenosperma|ArasteEVm001174t2;Arachis_hypogaea_Tifguard|ArahypEVm000687t1;Arachis_hypogaea_SunOleic_97R|ArahypEVm000687t1
cluster1477	3	Q9SD53	GO:0005886; C:plasma membrane; IDA:TAIR	Valsten1|AravsEVm009595t3;Arachis_hypogaea_Tifguard|ArahypEVm007653t4;Arachis_hypogaea_SunOleic_97R|ArahypEVm007892t1
cluster1478	3	Q9FI14	GO:0007165; P:signal transduction; IEA:InterPro	Valsten1|AravsEVm022907t1;Arachis_stenosperma|ArasteEVm019775t2;Arachis_valida|AravalEVm002363t10
cluster1479	3	Q8LK56	GO:0006349; P:regulation of gene expression by genetic imprinting; IMP:TAIR	Valsten1|AravsEVm001811t4;Arachis_stenosperma|ArasteEVm000137t2;Arachis_hypogaea_SunOleic_97R|ArahypEVm001093t8
cluster1480	3	Q8H965	GO:0009395; P:phospholipid catabolic process; IBA:GO_Central	Valsten1|AravsEVm005904t2;Arachis_stenosperma|ArasteEVm006240t2;Arachis_valida|AravalEVm008357t3
cluster1481	3	A6X935	GO:0034097; P:response to cytokine; IBA:GO_Central	Valsten1|AravsEVm003842t3;Arachis_stenosperma|ArasteEVm002547t3;Arachis_valida|AravalEVm001100t2
cluster1482	3	N/A	N/A	Valsten1|AravsEVm006379t2;Arachis_hypogaea_Tifguard|ArahypEVm008556t1;Arachis_hypogaea_SunOleic_97R|ArahypEVm008556t3
cluster1483	3	O22874	GO:0006949; P:syncytium formation; IEP:TAIR	Arachis_hypogaea_Tifguard|ArahypEVm016079t1;Arachis_hypogaea_SunOleic_97R|ArahypEVm016283t3;Arachis_valida|AravalEVm030762t1
cluster1484	3	D2WL32	GO:0019252; P:starch biosynthetic process; IEA:UniProtKB-UniPathway	Valsten1|AravsEVm001310t5;Arachis_stenosperma|ArasteEVm007058t5;Arachis_hypogaea_SunOleic_97R|ArahypEVm002012t1
cluster1485	3	Q9SE97	GO:0051016; P:barbed-end actin filament capping; IDA:TAIR	Valsten1|AravsEVm000422t2;Arachis_hypogaea_Tifguard|ArahypEVm007805t1;Arachis_valida|AravalEVm014496t1
cluster1486	3	Q69F95	GO:0016705; F:oxidoreductase activity, acting on paired donors, with incorporation or reduction of molecular oxygen; IEA:InterPro	Arachis_hypogaea_Tifguard|ArahypEVm006357t1;Arachis_stenosperma|ArasteEVm008431t1;Arachis_hypogaea_SunOleic_97R|ArahypEVm006357t1
cluster1487	3	F4J8K6	GO:0006364; P:rRNA processing; IMP:TAIR	Valsten1|AravsEVm000074t3;Arachis_stenosperma|ArasteEVm000094t1;Arachis_valida|AravalEVm017094t1
cluster1488	3	Q94FB9	GO:0016042; P:lipid catabolic process; IMP:CACAO	Valsten1|AravsEVm007422t2;Arachis_stenosperma|ArasteEVm000909t3;Arachis_valida|AravalEVm004951t1
cluster1489	3	N/A	N/A	Valsten1|AravsEVm011521t1;Arachis_hypogaea_Tifguard|ArahypEVm009223t1;Arachis_hypogaea_SunOleic_97R|ArahypEVm009223t1
cluster1490	3	Q9FWS3	GO:0015031; P:protein transport; IEA:UniProtKB-KW	Valsten1|AravsEVm010804t7;Arachis_hypogaea_Tifguard|ArahypEVm008977t3;Arachis_hypogaea_SunOleic_97R|ArahypEVm008977t1
cluster1491	3	F4HVM3	GO:0022857; F:transmembrane transporter activity; IEA:InterPro	Valsten1|AravsEVm008420t4;Arachis_stenosperma|ArasteEVm012640t2;Arachis_hypogaea_SunOleic_97R|ArahypEVm009202t2
cluster1492	3	Q9ZS51	GO:0005778; C:peroxisomal membrane; IEA:UniProtKB-SubCell	Valsten1|AravsEVm029188t7;Arachis_hypogaea_Tifguard|ArahypEVm021216t1;Arachis_hypogaea_SunOleic_97R|ArahypEVm021216t1
cluster1493	3	Q9LJW7	GO:0005886; C:plasma membrane; IEA:UniProtKB-SubCell	Valsten1|AravsEVm012723t1;Arachis_hypogaea_Tifguard|ArahypEVm000310t2;Arachis_hypogaea_SunOleic_97R|ArahypEVm000319t2
cluster1494	3	N/A	N/A	Arachis_hypogaea_Tifguard|ArahypEVm009801t1;Arachis_stenosperma|ArasteEVm019984t1;Arachis_hypogaea_SunOleic_97R|ArahypEVm009801t1
cluster1495	3	Q5PNZ7	GO:0046872; F:metal ion binding; IEA:UniProtKB-KW	Arachis_hypogaea_Tifguard|ArahypEVm022584t1;Arachis_hypogaea_SunOleic_97R|ArahypEVm022584t1;Arachis_valida|AravalEVm055951t2
cluster1496	3	O49621	GO:0009607; P:response to biotic stimulus; IEA:UniProtKB-KW	Arachis_hypogaea_Tifguard|ArahypEVm011403t3;Arachis_stenosperma|ArasteEVm006672t7;Arachis_hypogaea_SunOleic_97R|ArahypEVm011403t3
cluster1497	3	F4K0E8	GO:0016114; P:terpenoid biosynthetic process; IEA:InterPro	Arachis_hypogaea_Tifguard|ArahypEVm001884t2;Arachis_stenosperma|ArasteEVm002646t2;Arachis_hypogaea_SunOleic_97R|ArahypEVm001884t2
cluster1498	3	O04153	GO:0006457; P:protein folding; IGI:TAIR	Arachis_hypogaea_Tifguard|ArahypEVm014503t2;Arachis_stenosperma|ArasteEVm010437t2;Arachis_hypogaea_SunOleic_97R|ArahypEVm014503t2
cluster1499	3	Q9XF23	GO:0006629; P:lipid metabolic process; IEA:InterPro	Arachis_hypogaea_Tifguard|ArahypEVm003085t2;Arachis_stenosperma|ArasteEVm004417t2;Arachis_hypogaea_SunOleic_97R|ArahypEVm003085t2
cluster1500	3	N/A	N/A	Arachis_hypogaea_Tifguard|ArahypEVm000063t1;Arachis_stenosperma|ArasteEVm038797t1;Arachis_hypogaea_SunOleic_97R|ArahypEVm000063t2
cluster1501	3	Q65XS5	GO:0008375; F:acetylglucosaminyltransferase activity; IEA:InterPro	Arachis_hypogaea_Tifguard|ArahypEVm008554t2;Arachis_hypogaea_SunOleic_97R|ArahypEVm008554t2;Arachis_valida|AravalEVm015846t1
cluster1502	3	Q9FYA2	GO:0032107; P:regulation of response to nutrient levels; IMP:TAIR	Arachis_hypogaea_Tifguard|ArahypEVm024632t1;Arachis_hypogaea_SunOleic_97R|ArahypEVm024632t1;Arachis_valida|AravalEVm051961t1
cluster1503	3	Q8H111	GO:0003700; F:DNA-binding transcription factor activity; ISS:TAIR	Arachis_hypogaea_Tifguard|ArahypEVm000634t2;Arachis_stenosperma|ArasteEVm008783t3;Arachis_hypogaea_SunOleic_97R|ArahypEVm000813t15
cluster1504	3	Q4F883	GO:1900057; P:positive regulation of leaf senescence; IMP:UniProtKB	Arachis_hypogaea_Tifguard|ArahypEVm003494t4;Arachis_stenosperma|ArasteEVm004924t2;Arachis_hypogaea_SunOleic_97R|ArahypEVm003494t2
cluster1505	3	P13917	GO:0006508; P:proteolysis; IBA:GO_Central	Arachis_hypogaea_Tifguard|ArahypEVm007428t2;Arachis_hypogaea_SunOleic_97R|ArahypEVm007428t2;Arachis_valida|AravalEVm012692t1
cluster1506	3	Q9FKZ1	GO:0006952; P:defense response; IEA:UniProtKB-KW	Arachis_hypogaea_Tifguard|ArahypEVm002334t1;Arachis_stenosperma|ArasteEVm001990t3;Arachis_hypogaea_SunOleic_97R|ArahypEVm002334t1
cluster1507	3	Q93XW7	GO:0046872; F:metal ion binding; IEA:UniProtKB-KW	Arachis_hypogaea_Tifguard|ArahypEVm006669t5;Arachis_stenosperma|ArasteEVm009322t3;Arachis_hypogaea_SunOleic_97R|ArahypEVm006669t9
cluster1508	3	Q8C5W4	GO:0008270; F:zinc ion binding; IEA:InterPro	Arachis_hypogaea_Tifguard|ArahypEVm001223t1;Arachis_stenosperma|ArasteEVm001415t5;Arachis_hypogaea_SunOleic_97R|ArahypEVm001223t4
cluster1509	3	O35142	GO:0006890; P:retrograde vesicle-mediated transport, Golgi to ER; IBA:GO_Central	Arachis_hypogaea_Tifguard|ArahypEVm038857t1;Arachis_hypogaea_SunOleic_97R|ArahypEVm038857t1;Arachis_valida|AravalEVm024390t1
cluster1510	3	N/A	N/A	Arachis_hypogaea_Tifguard|ArahypEVm033616t2;Arachis_hypogaea_SunOleic_97R|ArahypEVm033616t2;Arachis_valida|AravalEVm073547t1
cluster1511	3	Q58FZ0	GO:0030001; P:metal ion transport; IEA:InterPro	Arachis_hypogaea_Tifguard|ArahypEVm026126t6;Arachis_hypogaea_SunOleic_97R|ArahypEVm026126t6;Arachis_valida|AravalEVm055252t2
cluster1512	3	B6SFA4	GO:0009875; P:pollen-pistil interaction; IMP:TAIR	Arachis_hypogaea_Tifguard|ArahypEVm001088t7;Arachis_hypogaea_SunOleic_97R|ArahypEVm000058t8;Arachis_stenosperma|ArasteEVm000551t3
cluster1513	3	Q9FKL6	GO:0080142; P:regulation of salicylic acid biosynthetic process; IBA:GO_Central	Arachis_hypogaea_Tifguard|ArahypEVm006495t6;Arachis_stenosperma|ArasteEVm008569t5;Arachis_hypogaea_SunOleic_97R|ArahypEVm006495t6
cluster1514	3	Q93YN1	GO:0002237; P:response to molecule of bacterial origin; IEP:UniProtKB	Arachis_hypogaea_Tifguard|ArahypEVm012447t2;Arachis_stenosperma|ArasteEVm012045t2;Arachis_hypogaea_SunOleic_97R|ArahypEVm012447t2
cluster1515	3	Q9ZV31	GO:0007166; P:cell surface receptor signaling pathway; IEA:InterPro	Arachis_hypogaea_Tifguard|ArahypEVm001597t7;Arachis_stenosperma|ArasteEVm000975t3;Arachis_hypogaea_SunOleic_97R|ArahypEVm001597t11
cluster1516	3	Q7K4W1	GO:0035600; P:tRNA methylthiolation; IBA:GO_Central	Arachis_hypogaea_Tifguard|ArahypEVm002931t5;Arachis_stenosperma|ArasteEVm004264t2;Arachis_hypogaea_SunOleic_97R|ArahypEVm002931t2
cluster1517	3	P26413	GO:0006986; P:response to unfolded protein; IBA:GO_Central	Arachis_hypogaea_Tifguard|ArahypEVm001957t4;Arachis_hypogaea_SunOleic_97R|ArahypEVm006468t1;Arachis_hypogaea_SunOleic_97R|ArahypEVm001957t4
cluster1518	3	Q8RY25	GO:0034398; P:telomere tethering at nuclear periphery; IBA:GO_Central	Arachis_hypogaea_Tifguard|ArahypEVm000471t2;Arachis_stenosperma|ArasteEVm020203t1;Arachis_hypogaea_SunOleic_97R|ArahypEVm000471t3
cluster1519	3	Q84MB3	GO:0016491; F:oxidoreductase activity; IEA:UniProtKB-KW	Arachis_hypogaea_Tifguard|ArahypEVm009935t9;Arachis_hypogaea_SunOleic_97R|ArahypEVm009935t9;Arachis_valida|AravalEVm018196t1
cluster1520	3	F4I1X0	GO:0070475; P:rRNA base methylation; IBA:GO_Central	Arachis_hypogaea_Tifguard|ArahypEVm007115t1;Arachis_stenosperma|ArasteEVm009392t2;Arachis_hypogaea_SunOleic_97R|ArahypEVm007115t2
cluster1521	3	P42088	GO:0046872; F:metal ion binding; IEA:UniProtKB-KW	Arachis_hypogaea_Tifguard|ArahypEVm015539t1;Arachis_hypogaea_SunOleic_97R|ArahypEVm015539t1;Arachis_valida|AravalEVm029602t1
cluster1522	3	N/A	N/A	Arachis_hypogaea_Tifguard|ArahypEVm003208t7;Arachis_hypogaea_SunOleic_97R|ArahypEVm003208t7;Arachis_hypogaea_SunOleic_97R|ArahypEVm003208t5
cluster1523	3	O80739	GO:0006813; P:potassium ion transport; IBA:GO_Central	Arachis_hypogaea_Tifguard|ArahypEVm001084t3;Arachis_hypogaea_SunOleic_97R|ArahypEVm001084t1;Arachis_valida|AravalEVm011189t1
cluster1524	3	O42926	GO:0006623; P:protein targeting to vacuole; IBA:GO_Central	Arachis_hypogaea_Tifguard|ArahypEVm000020t2;Arachis_stenosperma|ArasteEVm000013t4;Arachis_hypogaea_SunOleic_97R|ArahypEVm000020t1
cluster1525	3	Q40392	GO:0007165; P:signal transduction; IEA:InterPro	Arachis_hypogaea_Tifguard|ArahypEVm004598t2;Arachis_stenosperma|ArasteEVm006226t1;Arachis_hypogaea_SunOleic_97R|ArahypEVm004598t2
cluster1526	3	Q6RET7	GO:0009877; P:nodulation; IMP:UniProtKB	Arachis_hypogaea_Tifguard|ArahypEVm009719t2;Arachis_stenosperma|ArasteEVm006580t2;Arachis_hypogaea_SunOleic_97R|ArahypEVm009719t2
cluster1527	3	Q5JK32	GO:0006813; P:potassium ion transport; IBA:GO_Central	Arachis_hypogaea_Tifguard|ArahypEVm005834t3;Arachis_stenosperma|ArasteEVm053674t1;Arachis_hypogaea_SunOleic_97R|ArahypEVm005834t3
cluster1528	3	Q3EBC8	GO:0051214; P:RNA virus induced gene silencing; IGI:TAIR	Arachis_hypogaea_Tifguard|ArahypEVm001603t4;Arachis_stenosperma|ArasteEVm002574t5;Arachis_hypogaea_SunOleic_97R|ArahypEVm001603t4
cluster1529	3	Q8VWQ5	GO:0009867; P:jasmonic acid mediated signaling pathway; IGI:TAIR	Arachis_hypogaea_Tifguard|ArahypEVm019034t2;Arachis_stenosperma|ArasteEVm028963t2;Arachis_hypogaea_SunOleic_97R|ArahypEVm019034t2
cluster1530	3	Q9LQV2	GO:0010025; P:wax biosynthetic process; IGI:TAIR	Arachis_hypogaea_Tifguard|ArahypEVm000318t8;Arachis_stenosperma|ArasteEVm000621t2;Arachis_hypogaea_SunOleic_97R|ArahypEVm000318t13
cluster1531	3	N/A	N/A	Arachis_hypogaea_Tifguard|ArahypEVm003020t2;Arachis_hypogaea_SunOleic_97R|ArahypEVm003020t2;Arachis_valida|AravalEVm006037t2
cluster1532	3	Q3ED78	GO:0003723; F:RNA binding; IEA:UniProtKB-KW	Arachis_hypogaea_Tifguard|ArahypEVm000112t9;Arachis_stenosperma|ArasteEVm000328t3;Arachis_hypogaea_SunOleic_97R|ArahypEVm000112t14
cluster1533	3	Q60EW9	GO:0005886; C:plasma membrane; IEA:UniProtKB-SubCell	Arachis_hypogaea_Tifguard|ArahypEVm001367t1;Arachis_stenosperma|ArasteEVm003548t2;Arachis_hypogaea_SunOleic_97R|ArahypEVm001367t1
cluster1534	3	Q9M126	GO:0045893; P:positive regulation of transcription, DNA-templated; IDA:TAIR	Arachis_hypogaea_Tifguard|ArahypEVm005992t6;Arachis_stenosperma|ArasteEVm007921t2;Arachis_hypogaea_SunOleic_97R|ArahypEVm005992t6
cluster1535	3	Q84W56	GO:0006364; P:rRNA processing; IEA:UniProtKB-KW	Arachis_hypogaea_Tifguard|ArahypEVm000937t2;Arachis_stenosperma|ArasteEVm001617t2;Arachis_hypogaea_SunOleic_97R|ArahypEVm000937t4
cluster1536	3	Q9FL62	GO:0009751; P:response to salicylic acid; IEP:TAIR	Arachis_hypogaea_Tifguard|ArahypEVm010450t1;Arachis_stenosperma|ArasteEVm014362t2;Arachis_hypogaea_SunOleic_97R|ArahypEVm010450t1
cluster1537	3	Q8L5Z4	GO:1901259; P:chloroplast rRNA processing; IMP:TAIR	Arachis_hypogaea_Tifguard|ArahypEVm002628t4;Arachis_stenosperma|ArasteEVm003904t4;Arachis_hypogaea_SunOleic_97R|ArahypEVm002628t4
cluster1538	3	F4IBD7	GO:0005227; F:calcium activated cation channel activity; IBA:GO_Central	Arachis_stenosperma|ArasteEVm002634t5;Arachis_valida|AravalEVm002864t5;Arachis_hypogaea_SunOleic_97R|ArahypEVm006211t3
cluster1539	3	N/A	N/A	Arachis_hypogaea_SunOleic_97R|ArahypEVm017109t1;Arachis_stenosperma|ArasteEVm015458t5;Arachis_valida|AravalEVm008045t1
cluster1540	2	Q12000	GO:0002181; P:cytoplasmic translation; IGI:SGD	Arachis_valida|AravalEVm020219t1;Arachis_valida|AravalEVm015211t3
cluster1541	2	O80742	GO:0010029; P:regulation of seed germination; IGI:TAIR	Arachis_valida|AravalEVm004331t1;Arachis_valida|AravalEVm004348t1
cluster1542	2	Q8WZJ7	GO:0035999; P:tetrahydrofolate interconversion; IEA:UniProtKB-UniPathway	Arachis_valida|AravalEVm001711t2;Arachis_valida|AravalEVm010069t1
cluster1543	2	P82120	GO:0042302; F:structural constituent of cuticle; IEA:UniProtKB-KW	Arachis_valida|AravalEVm009139t2;Arachis_valida|AravalEVm009139t1
cluster1544	2	Q8J0F0	GO:0042318; P:penicillin biosynthetic process; IMP:UniProtKB	Arachis_valida|AravalEVm017688t1;Arachis_valida|AravalEVm030469t1
cluster1545	2	Q0QLE4	GO:0051187; P:cofactor catabolic process; IDA:UniProtKB	Arachis_valida|AravalEVm016209t8;Arachis_valida|AravalEVm024795t1
cluster1546	2	A2RSQ1	GO:0005975; P:carbohydrate metabolic process; IEA:InterPro	Arachis_valida|AravalEVm004252t1;Arachis_valida|AravalEVm004252t3
cluster1547	2	Q7SGY6	GO:0006099; P:tricarboxylic acid cycle; IBA:GO_Central	Arachis_valida|AravalEVm037990t2;Arachis_valida|AravalEVm047646t1
cluster1548	2	N/A	N/A	Arachis_valida|AravalEVm027392t4;Arachis_valida|AravalEVm014290t1
cluster1549	2	P04817	GO:0055085; P:transmembrane transport; IDA:SGD	Arachis_valida|AravalEVm021379t1;Arachis_valida|AravalEVm007892t1
cluster1550	2	Q7S6U4	GO:0030246; F:carbohydrate binding; IEA:UniProtKB-KW	Arachis_valida|AravalEVm063198t1;Arachis_valida|AravalEVm052509t7
cluster1551	2	Q03662	GO:0009734; P:auxin-activated signaling pathway; IEA:UniProtKB-KW	Arachis_valida|AravalEVm033466t1;Arachis_valida|AravalEVm034070t1
cluster1552	2	O42767	GO:0044205; P:'de novo' UMP biosynthetic process; IEA:UniProtKB-UniPathway	Arachis_valida|AravalEVm034278t2;Arachis_valida|AravalEVm031775t1
cluster1553	2	N/A	N/A	Arachis_valida|AravalEVm034776t1;Arachis_valida|AravalEVm029592t2
cluster1554	2	Q8GW72	GO:0016139; P:glycoside catabolic process; IBA:GO_Central	Arachis_valida|AravalEVm010809t1;Arachis_valida|AravalEVm010809t2
cluster1555	2	Q5B2K4	GO:0006847; P:plasma membrane acetate transport; IMP:AspGD	Arachis_valida|AravalEVm021211t3;Arachis_valida|AravalEVm025864t1
cluster1556	2	N/A	N/A	Arachis_valida|AravalEVm005011t8;Arachis_valida|AravalEVm005011t6
cluster1557	2	Q8RWI9	GO:0055085; P:transmembrane transport; IBA:GO_Central	Arachis_valida|AravalEVm005190t3;Arachis_valida|AravalEVm005190t5
cluster1558	2	P52914	GO:0051028; P:mRNA transport; IEA:UniProtKB-KW	Arachis_valida|AravalEVm011776t2;Arachis_valida|AravalEVm013935t1
cluster1559	2	Q9SJ62	GO:0005874; C:microtubule; IEA:UniProtKB-KW	Arachis_valida|AravalEVm014452t1;Arachis_valida|AravalEVm014452t2
cluster1560	2	N/A	N/A	Arachis_valida|AravalEVm038374t3;Arachis_valida|AravalEVm068196t1
cluster1561	2	Q6UEF0	GO:0016491; F:oxidoreductase activity; IEA:UniProtKB-KW	Arachis_valida|AravalEVm014743t1;Arachis_valida|AravalEVm012956t1
cluster1562	2	N/A	N/A	Arachis_valida|AravalEVm044530t2;Arachis_valida|AravalEVm044530t1
cluster1563	2	N/A	N/A	Arachis_valida|AravalEVm044096t2;Arachis_valida|AravalEVm044096t1
cluster1564	2	O13923	GO:0030041; P:actin filament polymerization; NAS:PomBase	Arachis_valida|AravalEVm006262t2;Arachis_valida|AravalEVm006262t1
cluster1565	2	N/A	N/A	Arachis_valida|AravalEVm014465t2;Arachis_valida|AravalEVm014465t1
cluster1566	2	A7PZL3	GO:0005975; P:carbohydrate metabolic process; IEA:InterPro	Arachis_valida|AravalEVm026437t2;Arachis_valida|AravalEVm026437t3
cluster1567	2	P85524	GO:0006952; P:defense response; IEA:InterPro	Arachis_valida|AravalEVm052607t2;Arachis_valida|AravalEVm052607t4
cluster1568	2	Q02753	GO:0002181; P:cytoplasmic translation; IC:SGD	Arachis_valida|AravalEVm050587t3;Arachis_valida|AravalEVm050615t1
cluster1569	2	P41825	GO:0005524; F:ATP binding; IEA:UniProtKB-KW	Arachis_valida|AravalEVm007028t1;Arachis_valida|AravalEVm007336t1
cluster1570	2	P93046	GO:0010411; P:xyloglucan metabolic process; IEA:InterPro	Arachis_valida|AravalEVm024712t2;Arachis_valida|AravalEVm024842t1
cluster1571	2	Q6YFE4	GO:0045454; P:cell redox homeostasis; IEA:InterPro	Arachis_valida|AravalEVm053309t1;Arachis_valida|AravalEVm024248t2
cluster1572	2	O81845	GO:0009853; P:photorespiration; IMP:TAIR	Arachis_valida|AravalEVm025502t2;Arachis_valida|AravalEVm015575t2
cluster1573	2	P51069	GO:0009058; P:biosynthetic process; IEA:InterPro	Arachis_valida|AravalEVm053509t3;Arachis_valida|AravalEVm053509t1
cluster1574	2	Q9ZSA8	GO:0046244; P:salicylic acid catabolic process; IDA:UniProtKB	Arachis_valida|AravalEVm020216t2;Arachis_valida|AravalEVm018931t2
cluster1575	2	Q93X23	GO:0050551; F:myrcene synthase activity; IEA:UniProtKB-EC	Arachis_valida|AravalEVm006600t4;Arachis_valida|AravalEVm006600t2
cluster1576	2	P40086	GO:0008535; P:respiratory chain complex IV assembly; IBA:GO_Central	Arachis_valida|AravalEVm030880t1;Arachis_valida|AravalEVm012217t5
cluster1577	2	Q9HE74	GO:0006412; P:translation; IBA:GO_Central	Arachis_valida|AravalEVm056726t1;Arachis_valida|AravalEVm055986t4
cluster1578	2	N/A	N/A	Arachis_valida|AravalEVm063461t2;Arachis_valida|AravalEVm063461t1
cluster1579	2	Q0P5A0	GO:0035725; P:sodium ion transmembrane transport; ISS:UniProtKB	Arachis_valida|AravalEVm020041t2;Arachis_valida|AravalEVm007574t1
cluster1580	2	N/A	N/A	Arachis_valida|AravalEVm005928t3;Arachis_valida|AravalEVm005928t2
cluster1581	2	N/A	N/A	Arachis_valida|AravalEVm002573t1;Arachis_valida|AravalEVm001739t6
cluster1582	2	Q3S2U2	GO:0016746; F:transferase activity, transferring acyl groups; IEA:UniProtKB-KW	Arachis_valida|AravalEVm019134t1;Arachis_valida|AravalEVm016038t1
cluster1583	2	Q5B1Z0	GO:0000302; P:response to reactive oxygen species; IBA:GO_Central	Arachis_valida|AravalEVm017196t1;Arachis_valida|AravalEVm019258t1
cluster1584	2	P19115	GO:0006412; P:translation; IBA:GO_Central	Arachis_valida|AravalEVm053697t1;Arachis_valida|AravalEVm035535t2
cluster1585	2	N/A	N/A	Arachis_valida|AravalEVm007372t1;Arachis_valida|AravalEVm007478t1
cluster1586	2	Q9LPC6	GO:0048364; P:root development; IEA:InterPro	Arachis_valida|AravalEVm002020t3;Arachis_valida|AravalEVm001979t4
cluster1587	2	N/A	N/A	Arachis_valida|AravalEVm028070t2;Arachis_valida|AravalEVm019281t1
cluster1588	2	N/A	N/A	Arachis_valida|AravalEVm031795t3;Arachis_valida|AravalEVm031795t1
cluster1589	2	A2Y5T7	GO:0062055; P:photosynthetic state transition; IEA:EnsemblPlants	Arachis_valida|AravalEVm025595t2;Arachis_valida|AravalEVm025595t4
cluster1590	2	Q5B6Q3	GO:0009251; P:glucan catabolic process; IDA:AspGD	Arachis_valida|AravalEVm022641t1;Arachis_valida|AravalEVm004327t1
cluster1591	2	N/A	N/A	Arachis_valida|AravalEVm019785t1;Arachis_valida|AravalEVm004488t5
cluster1592	2	Q9NL89	GO:0045088; P:regulation of innate immune response; IDA:UniProtKB	Arachis_valida|AravalEVm022719t1;Arachis_valida|AravalEVm007176t1
cluster1593	2	P25985	GO:0009607; P:response to biotic stimulus; IEA:UniProtKB-KW	Arachis_valida|AravalEVm068589t2;Arachis_valida|AravalEVm068589t7
cluster1594	2	N/A	N/A	Arachis_valida|AravalEVm046812t2;Arachis_valida|AravalEVm049511t2
cluster1595	2	Q8RXN0	GO:0055085; P:transmembrane transport; IBA:GO_Central	Arachis_valida|AravalEVm005773t2;Arachis_valida|AravalEVm005773t1
cluster1596	2	P0C042	N/A	Arachis_valida|AravalEVm018115t4;Arachis_valida|AravalEVm018115t2
cluster1597	2	P28350	GO:0006438; P:valyl-tRNA aminoacylation; IBA:GO_Central	Arachis_valida|AravalEVm001077t1;Arachis_valida|AravalEVm000869t3
cluster1598	2	Q10478	GO:0045040; P:protein import into mitochondrial outer membrane; ISO:PomBase	Arachis_valida|AravalEVm009725t1;Arachis_valida|AravalEVm009086t1
cluster1599	2	N/A	N/A	Arachis_valida|AravalEVm026399t1;Arachis_valida|AravalEVm021691t1
cluster1600	2	P87142	GO:0006986; P:response to unfolded protein; IBA:GO_Central	Arachis_valida|AravalEVm007669t1;Arachis_valida|AravalEVm007517t2
cluster1601	2	Q9SRX4	GO:0045490; P:pectin catabolic process; IEA:UniProtKB-UniPathway	Arachis_valida|AravalEVm016527t1;Arachis_valida|AravalEVm008161t2
cluster1602	2	A9WC41	GO:0006633; P:fatty acid biosynthetic process; IBA:GO_Central	Arachis_valida|AravalEVm019989t1;Arachis_valida|AravalEVm020296t1
cluster1603	2	Q9LIG6	GO:0097428; P:protein maturation by iron-sulfur cluster transfer; IBA:GO_Central	Arachis_valida|AravalEVm028570t1;Arachis_valida|AravalEVm022950t1
cluster1604	2	O14209	GO:0034276; P:kynurenic acid biosynthetic process; ISO:PomBase	Arachis_valida|AravalEVm012719t1;Arachis_valida|AravalEVm012190t4
cluster1605	2	Q9SCU0	GO:0016491; F:oxidoreductase activity; IEA:UniProtKB-KW	Arachis_valida|AravalEVm026721t3;Arachis_valida|AravalEVm028192t1
cluster1606	2	Q9USM7	GO:0030150; P:protein import into mitochondrial matrix; ISO:PomBase	Arachis_valida|AravalEVm033653t1;Arachis_valida|AravalEVm039864t1
cluster1607	2	N/A	N/A	Arachis_valida|AravalEVm026121t1;Arachis_valida|AravalEVm027178t1
cluster1608	2	F1QGW6	GO:0001731; P:formation of translation preinitiation complex; IBA:GO_Central	Arachis_valida|AravalEVm012010t3;Arachis_valida|AravalEVm009734t1
cluster1609	2	Q9VAN0	GO:0006564; P:L-serine biosynthetic process; IBA:GO_Central	Arachis_valida|AravalEVm018509t1;Arachis_valida|AravalEVm029268t1
cluster1610	2	N/A	N/A	Arachis_valida|AravalEVm045007t1;Arachis_valida|AravalEVm045007t2
cluster1611	2	O43000	GO:0015887; P:pantothenate transmembrane transport; IBA:GO_Central	Arachis_valida|AravalEVm009919t2;Arachis_valida|AravalEVm010386t1
cluster1612	2	P17423	GO:0009088; P:threonine biosynthetic process; IMP:SGD	Arachis_valida|AravalEVm019829t1;Arachis_valida|AravalEVm018678t3
cluster1613	2	P82120	GO:0042302; F:structural constituent of cuticle; IEA:UniProtKB-KW	Arachis_valida|AravalEVm020849t3;Arachis_valida|AravalEVm020849t1
cluster1614	2	P87090	GO:0008652; P:cellular amino acid biosynthetic process; IEA:UniProtKB-KW	Arachis_valida|AravalEVm029343t1;Arachis_valida|AravalEVm029343t2
cluster1615	2	N/A	N/A	Arachis_valida|AravalEVm013748t1;Arachis_valida|AravalEVm001899t2
cluster1616	2	Q59VM4	GO:0006357; P:regulation of transcription by RNA polymerase II; ISS:CGD	Arachis_valida|AravalEVm006443t4;Arachis_valida|AravalEVm022550t1
cluster1617	2	Q42707	GO:0005975; P:carbohydrate metabolic process; IEA:InterPro	Arachis_valida|AravalEVm020444t2;Arachis_valida|AravalEVm008087t1
cluster1618	2	P08158	GO:0034251; P:regulation of cellular amide catabolic process; IMP:AspGD	Arachis_valida|AravalEVm008887t1;Arachis_valida|AravalEVm008191t1
cluster1619	2	Q9HE25	GO:0002181; P:cytoplasmic translation; IBA:GO_Central	Arachis_valida|AravalEVm043141t2;Arachis_valida|AravalEVm043141t3
cluster1620	2	O82259	GO:0051015; F:actin filament binding; IBA:GO_Central	Arachis_valida|AravalEVm027671t2;Arachis_valida|AravalEVm027671t1
cluster1621	2	P45856	GO:0030435; P:sporulation resulting in formation of a cellular spore; IEA:UniProtKB-KW	Arachis_valida|AravalEVm023279t1;Arachis_valida|AravalEVm023395t1
cluster1622	2	N/A	N/A	Arachis_valida|AravalEVm026972t1;Arachis_valida|AravalEVm020853t1
cluster1623	2	I6LDA6	GO:0006096; P:glycolytic process; IEA:UniProtKB-UniPathway	Arachis_valida|AravalEVm009140t1;Arachis_valida|AravalEVm009318t1
cluster1624	2	Q9LNJ3	GO:0080167; P:response to karrikin; IEP:TAIR	Arachis_valida|AravalEVm026953t1;Arachis_valida|AravalEVm011902t1
cluster1625	2	N/A	N/A	Arachis_valida|AravalEVm019074t2;Arachis_valida|AravalEVm019074t1
cluster1626	2	Q95TX0	GO:0015031; P:protein transport; IEA:UniProtKB-KW	Arachis_valida|AravalEVm003680t1;Arachis_valida|AravalEVm003680t2
cluster1627	2	P55088	GO:0006833; P:water transport; IMP:MGI	Arachis_valida|AravalEVm029336t1;Arachis_valida|AravalEVm032558t1
cluster1628	2	N/A	N/A	Arachis_valida|AravalEVm049966t3;Arachis_valida|AravalEVm049966t1
cluster1629	2	N/A	N/A	Arachis_valida|AravalEVm027502t3;Arachis_valida|AravalEVm027502t2
cluster1630	2	N/A	N/A	Arachis_valida|AravalEVm024812t1;Arachis_valida|AravalEVm032562t1
cluster1631	2	Q6NPP4	GO:0009409; P:response to cold; IMP:TAIR	Arachis_valida|AravalEVm001000t6;Arachis_valida|AravalEVm001000t5
cluster1632	2	N/A	N/A	Arachis_valida|AravalEVm022088t1;Arachis_valida|AravalEVm020534t1
cluster1633	2	Q50EK1	GO:0016705; F:oxidoreductase activity, acting on paired donors, with incorporation or reduction of molecular oxygen; IEA:InterPro	Arachis_valida|AravalEVm023260t1;Arachis_valida|AravalEVm011192t1
cluster1634	2	O82491	GO:0010228; P:vegetative to reproductive phase transition of meristem; IMP:TAIR	Arachis_valida|AravalEVm001039t7;Arachis_valida|AravalEVm016099t1
cluster1635	2	P53275	GO:0009306; P:protein secretion; IBA:GO_Central	Arachis_valida|AravalEVm019160t4;Arachis_valida|AravalEVm019160t3
cluster1636	2	B1B5P4	GO:0004659; F:prenyltransferase activity; IDA:UniProtKB	Arachis_valida|AravalEVm016340t2;Arachis_valida|AravalEVm016340t1
cluster1637	2	P07144	GO:0008308; F:voltage-gated anion channel activity; IEA:InterPro	Arachis_valida|AravalEVm021207t2;Arachis_valida|AravalEVm023707t1
cluster1638	2	N/A	N/A	Arachis_valida|AravalEVm010859t1;Arachis_valida|AravalEVm010859t2
cluster1639	2	Q05528	GO:0045490; P:pectin catabolic process; IEA:UniProtKB-UniPathway	Arachis_valida|AravalEVm029684t1;Arachis_valida|AravalEVm030229t1
cluster1640	2	P32289	GO:0006542; P:glutamine biosynthetic process; IEA:InterPro	Arachis_valida|AravalEVm020451t1;Arachis_valida|AravalEVm014029t1
cluster1641	2	Q9HDW7	GO:0006874; P:cellular calcium ion homeostasis; IMP:PomBase	Arachis_valida|AravalEVm003379t1;Arachis_valida|AravalEVm018083t1
cluster1642	2	O22256	GO:0045490; P:pectin catabolic process; IEA:UniProtKB-UniPathway	Arachis_valida|AravalEVm007142t1;Arachis_valida|AravalEVm008161t1
cluster1643	2	B8NSV5	GO:0006511; P:ubiquitin-dependent protein catabolic process; ISS:UniProtKB	Arachis_valida|AravalEVm003636t1;Arachis_valida|AravalEVm018396t1
cluster1644	2	Q00770	GO:0006572; P:tyrosine catabolic process; IBA:GO_Central	Arachis_valida|AravalEVm014285t1;Arachis_valida|AravalEVm014994t1
cluster1645	2	Q9VYB4	GO:0030240; P:skeletal muscle thin filament assembly; IMP:FlyBase	Arachis_valida|AravalEVm017291t2;Arachis_valida|AravalEVm017291t1
cluster1646	2	N/A	N/A	Arachis_valida|AravalEVm056403t1;Arachis_valida|AravalEVm056403t2
cluster1647	2	C7YRS6	GO:0006915; P:apoptotic process; IEA:UniProtKB-KW	Arachis_valida|AravalEVm006093t2;Arachis_valida|AravalEVm008147t1
cluster1648	2	N/A	N/A	Arachis_valida|AravalEVm056539t1;Arachis_valida|AravalEVm061891t2
cluster1649	2	N/A	N/A	Arachis_valida|AravalEVm019671t1;Arachis_valida|AravalEVm021823t1
cluster1650	2	P00365	GO:0019551; P:glutamate catabolic process to 2-oxoglutarate; IEA:InterPro	Arachis_valida|AravalEVm001721t1;Arachis_valida|AravalEVm001639t1
cluster1651	2	O74308	GO:0000122; P:negative regulation of transcription by RNA polymerase II; IMP:PomBase	Arachis_valida|AravalEVm004762t1;Arachis_valida|AravalEVm010339t1
cluster1652	2	Q09MB2	GO:0006412; P:translation; IEA:UniProtKB-UniRule	Arachis_valida|AravalEVm036663t1;Arachis_valida|AravalEVm016057t1
cluster1653	2	Q4I099	GO:0015031; P:protein transport; IEA:UniProtKB-KW	Arachis_valida|AravalEVm008859t2;Arachis_valida|AravalEVm018575t1
cluster1654	2	B6H3H1	GO:0046872; F:metal ion binding; IEA:UniProtKB-KW	Arachis_valida|AravalEVm016945t1;Arachis_valida|AravalEVm016641t2
cluster1655	2	P94428	GO:0009450; P:gamma-aminobutyric acid catabolic process; IEA:UniProtKB-UniPathway	Arachis_valida|AravalEVm012034t1;Arachis_valida|AravalEVm011996t1
cluster1656	2	N/A	N/A	Arachis_valida|AravalEVm021002t1;Arachis_valida|AravalEVm021002t2
cluster1657	2	O70152	GO:0035269; P:protein O-linked mannosylation; ISS:HGNC	Arachis_valida|AravalEVm033165t1;Arachis_valida|AravalEVm032380t1
cluster1658	2	P53704	GO:0006047; P:UDP-N-acetylglucosamine metabolic process; IBA:GO_Central	Arachis_valida|AravalEVm004264t2;Arachis_valida|AravalEVm018673t1
cluster1659	2	N/A	N/A	Arachis_valida|AravalEVm009764t1;Arachis_valida|AravalEVm009764t2
cluster1660	2	P46331	GO:0016491; F:oxidoreductase activity; IEA:UniProtKB-KW	Arachis_valida|AravalEVm023871t1;Arachis_valida|AravalEVm021048t1
cluster1661	2	Q5ZIK9	GO:0006890; P:retrograde vesicle-mediated transport, Golgi to ER; IEA:InterPro	Arachis_valida|AravalEVm026059t1;Arachis_valida|AravalEVm025937t1
cluster1662	2	Q03667	GO:0007005; P:mitochondrion organization; IBA:GO_Central	Arachis_valida|AravalEVm050004t1;Arachis_valida|AravalEVm047971t1
cluster1663	2	N/A	N/A	Arachis_valida|AravalEVm085389t1;Arachis_valida|AravalEVm083477t1
cluster1664	2	P0A963	GO:0006520; P:cellular amino acid metabolic process; IEA:InterPro	Arachis_valida|AravalEVm022979t1;Arachis_valida|AravalEVm009120t1
cluster1665	2	O59941	GO:0007035; P:vacuolar acidification; IDA:UniProtKB	Arachis_valida|AravalEVm029950t1;Arachis_valida|AravalEVm030275t1
cluster1666	2	Q2TBM9	GO:0008654; P:phospholipid biosynthetic process; IEA:UniProtKB-KW	Arachis_valida|AravalEVm021196t2;Arachis_valida|AravalEVm023863t1
cluster1667	2	Q6DEL2	GO:0007275; P:multicellular organism development; IEA:UniProtKB-KW	Arachis_valida|AravalEVm004957t1;Arachis_valida|AravalEVm006284t1
cluster1668	2	N/A	N/A	Arachis_valida|AravalEVm037244t1;Arachis_valida|AravalEVm037244t2
cluster1669	2	Q03601	GO:0016567; P:protein ubiquitination; IDA:WormBase	Arachis_valida|AravalEVm002752t1;Arachis_valida|AravalEVm002752t2
cluster1670	2	N/A	N/A	Arachis_valida|AravalEVm043654t1;Arachis_valida|AravalEVm043654t2
cluster1671	2	Q9SXB8	GO:0048544; P:recognition of pollen; IEA:InterPro	Arachis_valida|AravalEVm003480t1;Arachis_valida|AravalEVm002849t1
cluster1672	2	P05130	GO:0035206; P:regulation of hemocyte proliferation; IMP:FlyBase	Arachis_valida|AravalEVm027217t1;Arachis_valida|AravalEVm000793t2
cluster1673	2	B5VKE8	GO:0006094; P:gluconeogenesis; IEA:UniProtKB-UniPathway	Arachis_valida|AravalEVm011912t1;Arachis_valida|AravalEVm030745t1
cluster1674	2	Q9LI74	GO:0009902; P:chloroplast relocation; IMP:TAIR	Arachis_valida|AravalEVm006494t3;Arachis_valida|AravalEVm001638t4
cluster1675	2	Q0CVT0	GO:0001732; P:formation of cytoplasmic translation initiation complex; IEA:UniProtKB-UniRule	Arachis_valida|AravalEVm002042t1;Arachis_valida|AravalEVm002311t2
cluster1676	2	N/A	N/A	Arachis_valida|AravalEVm006429t2;Arachis_valida|AravalEVm006429t1
cluster1677	2	Q39224	GO:0010150; P:leaf senescence; IEP:TAIR	Arachis_valida|AravalEVm020680t2;Arachis_valida|AravalEVm020680t3
cluster1678	2	C7YRR5	GO:0015031; P:protein transport; IEA:UniProtKB-KW	Arachis_valida|AravalEVm025155t4;Arachis_valida|AravalEVm024051t1
cluster1679	2	Q5B9Z8	GO:0045493; P:xylan catabolic process; IEA:UniProtKB-KW	Arachis_valida|AravalEVm022420t1;Arachis_valida|AravalEVm022430t1
cluster1680	2	O81360	GO:0009688; P:abscisic acid biosynthetic process; IEA:UniProtKB-UniPathway	Arachis_valida|AravalEVm004504t6;Arachis_valida|AravalEVm005639t3
cluster1681	2	P27250	GO:0006631; P:fatty acid metabolic process; IEA:UniProtKB-KW	Arachis_valida|AravalEVm021972t1;Arachis_valida|AravalEVm014989t2
cluster1682	2	S4W4F3	GO:0016491; F:oxidoreductase activity; IEA:UniProtKB-KW	Arachis_valida|AravalEVm020723t1;Arachis_valida|AravalEVm021572t1
cluster1683	2	Q16281	GO:0007601; P:visual perception; TAS:ProtInc	Arachis_valida|AravalEVm002561t1;Arachis_valida|AravalEVm007903t1
cluster1684	2	N/A	N/A	Arachis_valida|AravalEVm031976t3;Arachis_valida|AravalEVm031976t2
cluster1685	2	N/A	N/A	Arachis_valida|AravalEVm015278t1;Arachis_valida|AravalEVm013711t1
cluster1686	2	N/A	N/A	Arachis_valida|AravalEVm006714t2;Arachis_valida|AravalEVm006714t1
cluster1687	2	Q96WV5	GO:0006890; P:retrograde vesicle-mediated transport, Golgi to ER; ISO:PomBase	Arachis_valida|AravalEVm003961t1;Arachis_valida|AravalEVm000588t1
cluster1688	2	Q9P4X4	GO:0042144; P:vacuole fusion, non-autophagic; ISO:PomBase	Arachis_valida|AravalEVm024363t1;Arachis_valida|AravalEVm022766t1
cluster1689	2	Q92429	GO:0004784; F:superoxide dismutase activity; IEA:UniProtKB-EC	Arachis_valida|AravalEVm039159t1;Arachis_valida|AravalEVm034903t1
cluster1690	2	N/A	N/A	Arachis_valida|AravalEVm021441t5;Arachis_valida|AravalEVm021441t7
cluster1691	2	Q9Y713	GO:0003746; F:translation elongation factor activity; IEA:UniProtKB-KW	Arachis_valida|AravalEVm043576t1;Arachis_valida|AravalEVm043576t2
cluster1692	2	A4WEU6	GO:0046392; P:galactarate catabolic process; IEA:UniProtKB-UniRule	Arachis_valida|AravalEVm028886t1;Arachis_valida|AravalEVm026290t1
cluster1693	2	N/A	N/A	Arachis_valida|AravalEVm031986t2;Arachis_valida|AravalEVm031986t1
cluster1694	2	Q9P3T9	GO:0006511; P:ubiquitin-dependent protein catabolic process; ISO:PomBase	Arachis_valida|AravalEVm021892t1;Arachis_valida|AravalEVm018781t1
cluster1695	2	Q8KQL2	GO:0055114; P:oxidation-reduction process; IDA:UniProtKB	Arachis_valida|AravalEVm020179t1;Arachis_valida|AravalEVm019898t1
cluster1696	2	N/A	N/A	Arachis_valida|AravalEVm032518t2;Arachis_valida|AravalEVm032518t1
cluster1697	2	P33080	GO:0009734; P:auxin-activated signaling pathway; IEA:UniProtKB-KW	Arachis_valida|AravalEVm068499t5;Arachis_valida|AravalEVm068498t1
cluster1698	2	O61369	GO:0006814; P:sodium ion transport; IEA:UniProtKB-KW	Arachis_valida|AravalEVm010955t1;Arachis_valida|AravalEVm010637t1
cluster1699	2	O74858	GO:0032543; P:mitochondrial translation; NAS:PomBase	Arachis_valida|AravalEVm018015t1;Arachis_valida|AravalEVm006329t1
cluster1700	2	Q06712	GO:0000079; P:regulation of cyclin-dependent protein serine/threonine kinase activity; IEA:InterPro	Arachis_valida|AravalEVm016826t1;Arachis_valida|AravalEVm015551t2
cluster1701	2	Q870C4	GO:0015986; P:ATP synthesis coupled proton transport; IEA:InterPro	Arachis_valida|AravalEVm032818t1;Arachis_valida|AravalEVm033327t1
cluster1702	2	P53981	GO:0052646; P:alditol phosphate metabolic process; IMP:SGD	Arachis_valida|AravalEVm031669t2;Arachis_valida|AravalEVm030907t1
cluster1703	2	O93919	GO:0006166; P:purine ribonucleoside salvage; IEA:UniProtKB-KW	Arachis_valida|AravalEVm020641t1;Arachis_valida|AravalEVm020314t1
cluster1704	2	Q07451	GO:0070973; P:protein localization to endoplasmic reticulum exit site; IBA:GO_Central	Arachis_valida|AravalEVm042162t1;Arachis_valida|AravalEVm037843t1
cluster1705	2	O94389	GO:0006366; P:transcription by RNA polymerase II; IMP:PomBase	Arachis_valida|AravalEVm035028t1;Arachis_valida|AravalEVm036434t1
cluster1706	2	N/A	N/A	Arachis_valida|AravalEVm002039t3;Arachis_valida|AravalEVm002039t2
cluster1707	2	O82166	GO:0045892; P:negative regulation of transcription, DNA-templated; IEP:TAIR	Arachis_valida|AravalEVm029049t1;Arachis_valida|AravalEVm026518t1
cluster1708	2	O04353	GO:0006636; P:unsaturated fatty acid biosynthetic process; IEA:UniProtKB-UniPathway	Arachis_valida|AravalEVm013031t1;Arachis_valida|AravalEVm007763t1
cluster1709	2	Q03529	GO:0006673; P:inositol phosphoceramide metabolic process; IMP:SGD	Arachis_valida|AravalEVm016461t2;Arachis_valida|AravalEVm033654t2
cluster1710	2	N/A	N/A	Arachis_valida|AravalEVm013921t2;Arachis_valida|AravalEVm013921t3
cluster1711	2	O45782	GO:0007610; P:behavior; IEA:UniProtKB-KW	Arachis_valida|AravalEVm016804t1;Arachis_valida|AravalEVm024043t1
cluster1712	2	Q8VZK9	GO:0009833; P:plant-type primary cell wall biogenesis; IBA:GO_Central	Arachis_valida|AravalEVm004274t2;Arachis_valida|AravalEVm004274t1
cluster1713	2	N/A	N/A	Arachis_valida|AravalEVm054054t1;Arachis_valida|AravalEVm011328t1
cluster1714	2	A2SY66	GO:0016052; P:carbohydrate catabolic process; IDA:UniProtKB	Arachis_valida|AravalEVm016088t2;Arachis_valida|AravalEVm016088t1
cluster1715	2	Q9VEG6	GO:0006979; P:response to oxidative stress; IEA:InterPro	Arachis_valida|AravalEVm003581t2;Arachis_valida|AravalEVm000060t2
cluster1716	2	Q3SZ73	GO:0016787; F:hydrolase activity; IEA:UniProtKB-KW	Arachis_valida|AravalEVm022604t2;Arachis_valida|AravalEVm019761t5
cluster1717	2	P37892	GO:0008270; F:zinc ion binding; IEA:InterPro	Arachis_valida|AravalEVm010679t1;Arachis_valida|AravalEVm007169t1
cluster1718	2	Q5M7N9	GO:0006869; P:lipid transport; IEA:UniProtKB-KW	Arachis_valida|AravalEVm008314t1;Arachis_valida|AravalEVm008314t4
cluster1719	2	P33080	GO:0009734; P:auxin-activated signaling pathway; IEA:UniProtKB-KW	Arachis_valida|AravalEVm064376t2;Arachis_valida|AravalEVm064376t1
cluster1720	2	P27073	GO:0006412; P:translation; IEA:InterPro	Arachis_valida|AravalEVm054034t5;Arachis_valida|AravalEVm054034t6
cluster1721	2	B3EWP3	GO:0031640; P:killing of cells of other organism; IEA:UniProtKB-KW	Arachis_valida|AravalEVm092247t1;Arachis_valida|AravalEVm092247t2
cluster1722	2	Q9Y259	GO:0006646; P:phosphatidylethanolamine biosynthetic process; IDA:UniProtKB	Arachis_valida|AravalEVm013965t5;Arachis_valida|AravalEVm017078t3
cluster1723	2	N/A	N/A	Arachis_valida|AravalEVm013238t3;Arachis_valida|AravalEVm015365t1
cluster1724	2	Q9S9N6	GO:0009773; P:photosynthetic electron transport in photosystem I; IMP:TAIR	Arachis_valida|AravalEVm011510t1;Arachis_valida|AravalEVm011510t2
cluster1725	2	Q14409	GO:0006641; P:triglyceride metabolic process; IBA:GO_Central	Arachis_valida|AravalEVm009430t2;Arachis_valida|AravalEVm006625t2
cluster1726	2	P15368	GO:0042759; P:long-chain fatty acid biosynthetic process; IEA:InterPro	Arachis_valida|AravalEVm004080t2;Arachis_valida|AravalEVm006505t1
cluster1727	2	P04046	GO:0009113; P:purine nucleobase biosynthetic process; IEA:InterPro	Arachis_valida|AravalEVm009211t1;Arachis_valida|AravalEVm008711t1
cluster1728	2	A7I9J0	GO:0003677; F:DNA binding; IEA:UniProtKB-UniRule	Arachis_valida|AravalEVm063260t1;Arachis_valida|AravalEVm059882t1
cluster1729	2	N/A	N/A	Arachis_valida|AravalEVm023102t1;Arachis_valida|AravalEVm028189t1
cluster1730	2	N/A	N/A	Arachis_valida|AravalEVm026310t1;Arachis_valida|AravalEVm025057t1
cluster1731	2	P22354	GO:0032543; P:mitochondrial translation; IC:SGD	Arachis_valida|AravalEVm039001t1;Arachis_valida|AravalEVm033155t1
cluster1732	2	Q9P720	GO:0006412; P:translation; IEA:InterPro	Arachis_valida|AravalEVm040083t1;Arachis_valida|AravalEVm061583t1
cluster1733	2	N/A	N/A	Arachis_valida|AravalEVm008448t1;Arachis_valida|AravalEVm013635t1
cluster1734	2	O43488	GO:0006805; P:xenobiotic metabolic process; TAS:Reactome	Arachis_valida|AravalEVm020003t2;Arachis_valida|AravalEVm020183t1
cluster1735	2	Q96KP4	GO:0006750; P:glutathione biosynthetic process; TAS:Reactome	Arachis_valida|AravalEVm015742t1;Arachis_valida|AravalEVm011462t1
cluster1736	2	P27489	GO:0009416; P:response to light stimulus; IBA:GO_Central	Arachis_valida|AravalEVm029854t1;Arachis_valida|AravalEVm029036t1
cluster1737	2	Q9SFH9	GO:0006782; P:protoporphyrinogen IX biosynthetic process; IEA:UniProtKB-UniPathway	Arachis_valida|AravalEVm013458t2;Arachis_valida|AravalEVm018013t1
cluster1738	2	Q9UT21	GO:0002181; P:cytoplasmic translation; ISO:PomBase	Arachis_valida|AravalEVm012056t2;Arachis_valida|AravalEVm018526t1
cluster1739	2	N/A	N/A	Arachis_valida|AravalEVm069036t1;Arachis_valida|AravalEVm075627t1
cluster1740	2	P05100	GO:0006284; P:base-excision repair; IEA:InterPro	Arachis_valida|AravalEVm024708t3;Arachis_valida|AravalEVm024708t1
cluster1741	2	Q8GTR4	GO:0005983; P:starch catabolic process; IMP:TAIR	Arachis_valida|AravalEVm001569t6;Arachis_valida|AravalEVm001569t4
cluster1742	2	Q9Y899	GO:0051301; P:cell division; IEA:UniProtKB-KW	Arachis_valida|AravalEVm014880t1;Arachis_valida|AravalEVm016741t1
cluster1743	2	Q7RX33	GO:0052699; P:ergothioneine biosynthetic process; IEA:UniProtKB-UniPathway	Arachis_valida|AravalEVm002083t2;Arachis_valida|AravalEVm002083t3
cluster1744	2	Q15GI3	GO:0009699; P:phenylpropanoid biosynthetic process; IEA:UniProtKB-UniPathway	Arachis_valida|AravalEVm022455t2;Arachis_valida|AravalEVm022455t3
cluster1745	2	N/A	N/A	Arachis_valida|AravalEVm018057t2;Arachis_valida|AravalEVm018057t4
cluster1746	2	C9K7C8	GO:0009405; P:pathogenesis; IEA:UniProtKB-KW	Arachis_valida|AravalEVm018100t1;Arachis_valida|AravalEVm018255t1
cluster1747	2	P11803	GO:0042450; P:arginine biosynthetic process via ornithine; IBA:GO_Central	Arachis_valida|AravalEVm017475t2;Arachis_valida|AravalEVm017475t1
cluster1748	2	O14089	GO:0006610; P:ribosomal protein import into nucleus; IBA:GO_Central	Arachis_valida|AravalEVm001695t1;Arachis_valida|AravalEVm018478t1
cluster1749	2	Q9FIK0	GO:0006096; P:glycolytic process; ISS:TAIR	Arachis_valida|AravalEVm012268t1;Arachis_valida|AravalEVm029445t1
cluster1750	2	Q9P7B4	GO:0016491; F:oxidoreductase activity; IBA:GO_Central	Arachis_valida|AravalEVm020372t2;Arachis_valida|AravalEVm023719t1
cluster1751	2	O43105	GO:0006412; P:translation; IEA:InterPro	Arachis_valida|AravalEVm040489t1;Arachis_valida|AravalEVm064979t1
cluster1752	2	P20077	GO:0009058; P:biosynthetic process; IEA:InterPro	Arachis_valida|AravalEVm072552t2;Arachis_valida|AravalEVm072552t1
cluster1753	2	C7Z527	GO:0009249; P:protein lipoylation; IEA:UniProtKB-UniRule	Arachis_valida|AravalEVm015277t1;Arachis_valida|AravalEVm015010t1
cluster1754	2	Q9C5X3	GO:0006904; P:vesicle docking involved in exocytosis; IEA:InterPro	Arachis_valida|AravalEVm016489t1;Arachis_valida|AravalEVm016489t6
cluster1755	2	N/A	N/A	Arachis_valida|AravalEVm027247t1;Arachis_valida|AravalEVm027247t2
cluster1756	2	P21265	GO:0006189; P:'de novo' IMP biosynthetic process; TAS:Reactome	Arachis_valida|AravalEVm010889t1;Arachis_valida|AravalEVm011143t1
cluster1757	2	Q5AFP3	GO:2000220; P:regulation of pseudohyphal growth; IMP:CGD	Arachis_valida|AravalEVm028469t1;Arachis_valida|AravalEVm015599t1
cluster1758	2	O13848	GO:0016652; F:oxidoreductase activity, acting on NAD(P)H, NAD(P) as acceptor; IDA:PomBase	Arachis_valida|AravalEVm025818t1;Arachis_valida|AravalEVm025689t1
cluster1759	2	P55143	GO:0045454; P:cell redox homeostasis; IEA:InterPro	Arachis_valida|AravalEVm056298t1;Arachis_valida|AravalEVm067373t1
cluster1760	2	N/A	N/A	Arachis_valida|AravalEVm015850t4;Arachis_valida|AravalEVm015850t2
cluster1761	2	Q9XZ43	GO:0009166; P:nucleotide catabolic process; IEA:InterPro	Arachis_valida|AravalEVm005750t1;Arachis_valida|AravalEVm007202t1
cluster1762	2	P30171	GO:0005524; F:ATP binding; IEA:UniProtKB-KW	Arachis_valida|AravalEVm040680t2;Arachis_valida|AravalEVm017877t3
cluster1763	2	Q9HGV0	GO:0006414; P:translational elongation; IEA:InterPro	Arachis_valida|AravalEVm077238t1;Arachis_valida|AravalEVm055744t1
cluster1764	2	N/A	N/A	Arachis_valida|AravalEVm015050t1;Arachis_valida|AravalEVm031733t1
cluster1765	2	Q9ERB5	GO:0043252; P:sodium-independent organic anion transport; IBA:GO_Central	Arachis_valida|AravalEVm003006t2;Arachis_valida|AravalEVm012554t1
cluster1766	2	Q26636	GO:0007275; P:multicellular organism development; IEA:UniProtKB-KW	Arachis_valida|AravalEVm021870t1;Arachis_valida|AravalEVm021660t1
cluster1767	2	Q9HGI7	GO:0000288; P:nuclear-transcribed mRNA catabolic process, deadenylation-dependent decay; IEA:InterPro	Arachis_valida|AravalEVm003836t1;Arachis_valida|AravalEVm004164t1
cluster1768	2	Q94JU2	GO:0022857; F:transmembrane transporter activity; IEA:InterPro	Arachis_valida|AravalEVm019640t4;Arachis_valida|AravalEVm019640t2
cluster1769	2	Q9FH36	GO:0045492; P:xylan biosynthetic process; TAS:TAIR	Arachis_valida|AravalEVm008751t2;Arachis_valida|AravalEVm008788t6
cluster1770	2	O60113	GO:0003333; P:amino acid transmembrane transport; ISM:PomBase	Arachis_valida|AravalEVm009166t1;Arachis_valida|AravalEVm014619t1
cluster1771	2	Q64425	GO:0016042; P:lipid catabolic process; IEA:UniProtKB-KW	Arachis_valida|AravalEVm013700t1;Arachis_valida|AravalEVm012085t1
cluster1772	2	N/A	N/A	Arachis_valida|AravalEVm030360t1;Arachis_valida|AravalEVm041103t1
cluster1773	2	O94709	GO:0006086; P:acetyl-CoA biosynthetic process from pyruvate; ISS:PomBase	Arachis_valida|AravalEVm026066t1;Arachis_valida|AravalEVm014682t2
cluster1774	2	N/A	N/A	Arachis_valida|AravalEVm003161t2;Arachis_valida|AravalEVm003161t1
cluster1775	2	Q6BU46	GO:0006421; P:asparaginyl-tRNA aminoacylation; IEA:EnsemblFungi	Arachis_valida|AravalEVm015126t1;Arachis_valida|AravalEVm007851t2
cluster1776	2	N/A	N/A	Arachis_valida|AravalEVm045429t1;Arachis_valida|AravalEVm031312t1
cluster1777	2	O13920	GO:0032543; P:mitochondrial translation; ISO:PomBase	Arachis_valida|AravalEVm007986t5;Arachis_valida|AravalEVm017848t1
cluster1778	2	O14297	GO:0032981; P:mitochondrial respiratory chain complex I assembly; IEA:InterPro	Arachis_valida|AravalEVm035029t1;Arachis_valida|AravalEVm036404t1
cluster1779	2	Q9SVS1	GO:0005975; P:carbohydrate metabolic process; IEA:InterPro	Arachis_valida|AravalEVm015174t1;Arachis_valida|AravalEVm015174t3
cluster1780	2	N/A	N/A	Arachis_valida|AravalEVm078982t1;Arachis_valida|AravalEVm065479t1
cluster1781	2	N/A	N/A	Arachis_valida|AravalEVm078137t1;Arachis_valida|AravalEVm025147t1
cluster1782	2	Q9USR1	GO:0043161; P:proteasome-mediated ubiquitin-dependent protein catabolic process; IMP:PomBase	Arachis_valida|AravalEVm022592t1;Arachis_valida|AravalEVm023322t2
cluster1783	2	P50125	GO:0006534; P:cysteine metabolic process; IMP:AspGD	Arachis_valida|AravalEVm016794t1;Arachis_valida|AravalEVm029240t1
cluster1784	2	Q9FHK9	GO:0003746; F:translation elongation factor activity; IEA:UniProtKB-KW	Arachis_valida|AravalEVm012331t7;Arachis_valida|AravalEVm012331t3
cluster1785	2	P93654	GO:0006906; P:vesicle fusion; IBA:GO_Central	Arachis_valida|AravalEVm023216t2;Arachis_valida|AravalEVm028899t1
cluster1786	2	N/A	N/A	Arachis_valida|AravalEVm010100t2;Arachis_valida|AravalEVm010100t1
cluster1787	2	F4JH46	GO:0006855; P:drug transmembrane transport; IBA:GO_Central	Arachis_valida|AravalEVm010799t3;Arachis_valida|AravalEVm010799t6
cluster1788	2	N/A	N/A	Arachis_valida|AravalEVm043370t4;Arachis_valida|AravalEVm043370t1
cluster1789	2	P09093	GO:0006508; P:proteolysis; IBA:GO_Central	Arachis_valida|AravalEVm021117t1;Arachis_valida|AravalEVm021117t2
cluster1790	2	C0LGF4	GO:0030244; P:cellulose biosynthetic process; IEA:InterPro	Arachis_valida|AravalEVm009141t1;Arachis_valida|AravalEVm009141t2
cluster1791	2	P0CU28	GO:0006412; P:translation; IEA:InterPro	Arachis_valida|AravalEVm061272t1;Arachis_valida|AravalEVm061266t1
cluster1792	2	Q6JQN1	GO:0006635; P:fatty acid beta-oxidation; TAS:Reactome	Arachis_valida|AravalEVm020085t1;Arachis_valida|AravalEVm019614t1
cluster1793	2	Q9UGQ3	GO:0008645; P:hexose transmembrane transport; TAS:Reactome	Arachis_valida|AravalEVm007448t2;Arachis_valida|AravalEVm006618t1
cluster1794	2	Q9EQ20	GO:0006573; P:valine metabolic process; ISO:MGI	Arachis_valida|AravalEVm006229t2;Arachis_valida|AravalEVm006229t5
cluster1795	2	N/A	N/A	Arachis_valida|AravalEVm007627t1;Arachis_valida|AravalEVm007922t1
cluster1796	2	Q550S9	GO:0016021; C:integral component of membrane; IEA:UniProtKB-KW	Arachis_valida|AravalEVm027115t2;Arachis_valida|AravalEVm027115t1
cluster1797	2	Q5BBF4	GO:0051016; P:barbed-end actin filament capping; IBA:GO_Central	Arachis_valida|AravalEVm018165t1;Arachis_valida|AravalEVm028279t1
cluster1798	2	N/A	N/A	Arachis_valida|AravalEVm005645t5;Arachis_valida|AravalEVm005645t4
cluster1799	2	N/A	N/A	Arachis_valida|AravalEVm036108t1;Arachis_valida|AravalEVm026651t3
cluster1800	2	Q9US04	GO:0006749; P:glutathione metabolic process; IBA:GO_Central	Arachis_valida|AravalEVm013255t1;Arachis_valida|AravalEVm008649t1
cluster1801	2	P31648	GO:0009636; P:response to toxic substance; ISO:MGI	Arachis_valida|AravalEVm025629t1;Arachis_valida|AravalEVm005812t1
cluster1802	2	Q93X23	GO:0050551; F:myrcene synthase activity; IEA:UniProtKB-EC	Arachis_valida|AravalEVm006885t4;Arachis_valida|AravalEVm006885t5
cluster1803	2	P41956	GO:0006099; P:tricarboxylic acid cycle; IEA:UniProtKB-UniPathway	Arachis_valida|AravalEVm043352t1;Arachis_valida|AravalEVm042878t2
cluster1804	2	P93604	GO:0004674; F:protein serine/threonine kinase activity; IEA:UniProtKB-KW	Arachis_valida|AravalEVm006266t7;Arachis_valida|AravalEVm006266t6
cluster1805	2	P05656	GO:0005987; P:sucrose catabolic process; IBA:GO_Central	Arachis_valida|AravalEVm006836t1;Arachis_valida|AravalEVm007790t1
cluster1806	2	N/A	N/A	Arachis_valida|AravalEVm034270t2;Arachis_valida|AravalEVm034270t1
cluster1807	2	Q54ML6	GO:0015031; P:protein transport; IEA:UniProtKB-KW	Arachis_valida|AravalEVm041132t2;Arachis_valida|AravalEVm041132t4
cluster1808	2	Q9P4V2	GO:0006048; P:UDP-N-acetylglucosamine biosynthetic process; IEA:UniProtKB-UniPathway	Arachis_valida|AravalEVm008309t1;Arachis_valida|AravalEVm008660t1
cluster1809	2	P38009	GO:0006164; P:purine nucleotide biosynthetic process; IDA:SGD	Arachis_valida|AravalEVm006602t1;Arachis_valida|AravalEVm006640t1
cluster1810	2	N/A	N/A	Arachis_valida|AravalEVm046571t1;Arachis_valida|AravalEVm048611t3
cluster1811	2	Q9P3W6	GO:0016071; P:mRNA metabolic process; ISO:PomBase	Arachis_valida|AravalEVm011801t3;Arachis_valida|AravalEVm007582t2
cluster1812	2	P47815	GO:0003743; F:translation initiation factor activity; IEA:UniProtKB-KW	Arachis_valida|AravalEVm046701t1;Arachis_valida|AravalEVm054505t1
cluster1813	2	A7PZL3	GO:0005975; P:carbohydrate metabolic process; IEA:InterPro	Arachis_valida|AravalEVm026437t5;Arachis_valida|AravalEVm026437t1
cluster1814	2	Q8BRU6	GO:0009636; P:response to toxic substance; IMP:MGI	Arachis_valida|AravalEVm009326t1;Arachis_valida|AravalEVm036458t1
cluster1815	2	Q09844	GO:0016192; P:vesicle-mediated transport; NAS:PomBase	Arachis_valida|AravalEVm004081t4;Arachis_valida|AravalEVm004988t1
cluster1816	2	P11943	GO:0055114; P:oxidation-reduction process; IEA:UniProtKB-KW	Arachis_valida|AravalEVm058502t1;Arachis_valida|AravalEVm049133t1
cluster1817	2	Q9BXL1	GO:0055085; P:transmembrane transport; IBA:GO_Central	Arachis_valida|AravalEVm025292t1;Arachis_valida|AravalEVm022692t1
cluster1818	2	Q9LXG8	GO:0006952; P:defense response; IMP:TAIR	Arachis_valida|AravalEVm004780t2;Arachis_valida|AravalEVm004780t1
cluster1819	2	Q9P6U7	GO:0043161; P:proteasome-mediated ubiquitin-dependent protein catabolic process; IBA:GO_Central	Arachis_valida|AravalEVm039823t1;Arachis_valida|AravalEVm039354t1
cluster1820	2	P04828	GO:0006096; P:glycolytic process; IBA:GO_Central	Arachis_valida|AravalEVm031774t3;Arachis_valida|AravalEVm031916t1
cluster1821	2	N/A	N/A	Arachis_valida|AravalEVm034462t1;Arachis_valida|AravalEVm033302t1
cluster1822	2	Q8VCH6	GO:0009888; P:tissue development; IMP:MGI	Arachis_valida|AravalEVm008717t1;Arachis_valida|AravalEVm009859t1
cluster1823	2	O42772	GO:0006099; P:tricarboxylic acid cycle; IEA:UniProtKB-UniPathway	Arachis_valida|AravalEVm027938t1;Arachis_valida|AravalEVm025911t1
cluster1824	2	P10978	GO:0015074; P:DNA integration; IEA:InterPro	Arachis_valida|AravalEVm082617t1;Arachis_valida|AravalEVm047146t1
cluster1825	2	Q92372	GO:0007004; P:telomere maintenance via telomerase; EXP:PomBase	Arachis_valida|AravalEVm021478t1;Arachis_valida|AravalEVm002054t1
cluster1826	2	Q99144	GO:0016560; P:protein import into peroxisome matrix, docking; IBA:GO_Central	Arachis_valida|AravalEVm005373t4;Arachis_valida|AravalEVm005693t1
cluster1827	2	Q04225	GO:0006364; P:rRNA processing; IEA:UniProtKB-KW	Arachis_valida|AravalEVm010798t2;Arachis_valida|AravalEVm033442t1
cluster1828	2	Q6BPY6	GO:0006122; P:mitochondrial electron transport, ubiquinol to cytochrome c; IEA:EnsemblFungi	Arachis_valida|AravalEVm013265t1;Arachis_valida|AravalEVm012563t1
cluster1829	2	N/A	N/A	Arachis_valida|AravalEVm050363t2;Arachis_valida|AravalEVm050363t1
cluster1830	2	Q9VTG7	GO:0030166; P:proteoglycan biosynthetic process; NAS:FlyBase	Arachis_valida|AravalEVm014260t1;Arachis_valida|AravalEVm014260t2
cluster1831	2	P16273	GO:0009607; P:response to biotic stimulus; IEA:UniProtKB-KW	Arachis_valida|AravalEVm033793t2;Arachis_valida|AravalEVm033793t1
cluster1832	2	P49018	GO:0016255; P:attachment of GPI anchor to protein; IMP:SGD	Arachis_valida|AravalEVm021984t1;Arachis_valida|AravalEVm016807t1
cluster1833	2	Q9ZSD4	GO:0016192; P:vesicle-mediated transport; IMP:TAIR	Arachis_valida|AravalEVm026088t1;Arachis_valida|AravalEVm035099t1
cluster1834	2	N/A	N/A	Arachis_valida|AravalEVm000779t5;Arachis_valida|AravalEVm000779t6
cluster1835	2	P12105	GO:0030198; P:extracellular matrix organization; IBA:GO_Central	Arachis_valida|AravalEVm000203t2;Arachis_valida|AravalEVm000203t1
cluster1836	2	N/A	N/A	Arachis_valida|AravalEVm050089t1;Arachis_valida|AravalEVm061733t1
cluster1837	2	N/A	N/A	Arachis_valida|AravalEVm020049t1;Arachis_valida|AravalEVm031881t1
cluster1838	2	Q9USU9	GO:0006367; P:transcription initiation from RNA polymerase II promoter; ISO:PomBase	Arachis_valida|AravalEVm016482t3;Arachis_valida|AravalEVm018054t1
cluster1839	2	N/A	N/A	Arachis_valida|AravalEVm012411t3;Arachis_valida|AravalEVm012411t1
cluster1840	2	Q949V6	GO:0006511; P:ubiquitin-dependent protein catabolic process; IBA:GO_Central	Arachis_valida|AravalEVm007016t2;Arachis_valida|AravalEVm014764t1
cluster1841	2	Q06678	GO:0046578; P:regulation of Ras protein signal transduction; IBA:GO_Central	Arachis_valida|AravalEVm013323t1;Arachis_valida|AravalEVm029128t1
cluster1842	2	P78774	GO:0000281; P:mitotic cytokinesis; IMP:PomBase	Arachis_valida|AravalEVm018950t1;Arachis_valida|AravalEVm013949t1
cluster1843	2	Q4R755	GO:0006072; P:glycerol-3-phosphate metabolic process; IEA:InterPro	Arachis_valida|AravalEVm007864t1;Arachis_valida|AravalEVm011144t1
cluster1844	2	A2QHM1	GO:0015031; P:protein transport; IEA:UniProtKB-KW	Arachis_valida|AravalEVm024815t3;Arachis_valida|AravalEVm024343t1
cluster1845	2	P27929	GO:0045903; P:positive regulation of translational fidelity; IBA:GO_Central	Arachis_valida|AravalEVm009731t1;Arachis_valida|AravalEVm017615t1
cluster1846	2	Q9HGL3	GO:1904689; P:negative regulation of cytoplasmic translational initiation; ISO:PomBase	Arachis_valida|AravalEVm008216t1;Arachis_valida|AravalEVm007708t2
cluster1847	2	Q09887	GO:0003333; P:amino acid transmembrane transport; ISM:PomBase	Arachis_valida|AravalEVm014600t1;Arachis_valida|AravalEVm038223t1
cluster1848	2	Q9VQY2	GO:0008039; P:synaptic target recognition; IMP:FlyBase	Arachis_valida|AravalEVm000348t2;Arachis_valida|AravalEVm000348t3
cluster1849	2	O43100	GO:0031120; P:snRNA pseudouridine synthesis; IBA:GO_Central	Arachis_valida|AravalEVm010857t2;Arachis_valida|AravalEVm044298t1
cluster1850	2	Q1ZXF1	GO:0006635; P:fatty acid beta-oxidation; IBA:GO_Central	Arachis_valida|AravalEVm026278t1;Arachis_valida|AravalEVm026525t4
cluster1851	2	N/A	N/A	Arachis_valida|AravalEVm022977t3;Arachis_valida|AravalEVm022977t2
cluster1852	2	N/A	N/A	Arachis_valida|AravalEVm000083t6;Arachis_valida|AravalEVm000083t3
cluster1853	2	Q4WY53	GO:0005978; P:glycogen biosynthetic process; IBA:GO_Central	Arachis_valida|AravalEVm007936t1;Arachis_valida|AravalEVm007860t1
cluster1854	2	Q9SUC9	GO:0046658; C:anchored component of plasma membrane; IDA:TAIR	Arachis_valida|AravalEVm022683t1;Arachis_valida|AravalEVm025728t1
cluster1855	2	O74524	GO:0010133; P:proline catabolic process to glutamate; ISO:PomBase	Arachis_valida|AravalEVm009124t1;Arachis_valida|AravalEVm011885t1
cluster1856	2	P55809	GO:0042594; P:response to starvation; IEA:Ensembl	Arachis_valida|AravalEVm014495t1;Arachis_valida|AravalEVm025871t2
cluster1857	2	P38988	GO:0055085; P:transmembrane transport; IDA:SGD	Arachis_valida|AravalEVm025068t1;Arachis_valida|AravalEVm024446t1
cluster1858	2	O13752	GO:0016021; C:integral component of membrane; IEA:UniProtKB-KW	Arachis_valida|AravalEVm025164t1;Arachis_valida|AravalEVm022128t2
cluster1859	2	O74745	GO:0006487; P:protein N-linked glycosylation; ISO:PomBase	Arachis_valida|AravalEVm015363t1;Arachis_valida|AravalEVm020749t1
cluster1860	2	Q09896	GO:0006850; P:mitochondrial pyruvate transmembrane transport; ISO:PomBase	Arachis_valida|AravalEVm044083t1;Arachis_valida|AravalEVm063321t1
cluster1861	2	Q9VI75	GO:0048489; P:synaptic vesicle transport; IMP:FlyBase	Arachis_valida|AravalEVm010619t2;Arachis_valida|AravalEVm010619t1
cluster1862	2	N/A	N/A	Arachis_valida|AravalEVm025055t1;Arachis_valida|AravalEVm024470t1
cluster1863	2	Q6R2J8	GO:0006468; P:protein phosphorylation; IBA:GO_Central	Arachis_valida|AravalEVm003656t7;Arachis_valida|AravalEVm003656t3
cluster1864	2	P11592	GO:0046034; P:ATP metabolic process; IEA:InterPro	Arachis_valida|AravalEVm006414t1;Arachis_valida|AravalEVm004778t1
cluster1865	2	N/A	N/A	Arachis_valida|AravalEVm031447t1;Arachis_valida|AravalEVm031811t1
cluster1866	2	Q12109	GO:0006436; P:tryptophanyl-tRNA aminoacylation; IBA:GO_Central	Arachis_valida|AravalEVm034548t1;Arachis_valida|AravalEVm012620t2
cluster1867	2	Q6F4M7	GO:0009712; P:catechol-containing compound metabolic process; IEA:InterPro	Arachis_valida|AravalEVm022221t1;Arachis_valida|AravalEVm026261t1
cluster1868	2	C9SV08	GO:0000054; P:ribosomal subunit export from nucleus; IEA:UniProtKB-UniRule	Arachis_valida|AravalEVm024976t1;Arachis_valida|AravalEVm032242t1
cluster1869	2	A2QLK4	GO:0008360; P:regulation of cell shape; IEA:UniProtKB-KW	Arachis_valida|AravalEVm000143t2;Arachis_valida|AravalEVm000143t1
cluster1870	2	P83501	GO:0010629; P:negative regulation of gene expression; ISS:FlyBase	Arachis_valida|AravalEVm011880t1;Arachis_valida|AravalEVm018251t1
cluster1871	2	Q9LZX4	GO:0005886; C:plasma membrane; IDA:TAIR	Arachis_valida|AravalEVm014530t1;Arachis_valida|AravalEVm014610t3
cluster1872	2	P94040	GO:0055114; P:oxidation-reduction process; IEA:GOC	Arachis_valida|AravalEVm038618t1;Arachis_valida|AravalEVm038200t1
cluster1873	2	Q0CRC9	GO:0000272; P:polysaccharide catabolic process; IEA:UniProtKB-KW	Arachis_valida|AravalEVm031631t1;Arachis_valida|AravalEVm031759t1
cluster1874	2	Q9SDQ4	GO:0071230; P:cellular response to amino acid stimulus; ISS:UniProtKB	Arachis_valida|AravalEVm003215t3;Arachis_valida|AravalEVm003215t5
cluster1875	2	N/A	N/A	Arachis_valida|AravalEVm021929t3;Arachis_valida|AravalEVm021929t4
cluster1876	2	N/A	N/A	Arachis_valida|AravalEVm013279t5;Arachis_valida|AravalEVm013279t4
cluster1877	2	P05747	GO:0002181; P:cytoplasmic translation; IDA:SGD	Arachis_valida|AravalEVm096828t2;Arachis_valida|AravalEVm096875t1
cluster1878	2	Q9XGY7	GO:0006629; P:lipid metabolic process; IEA:UniProtKB-KW	Arachis_valida|AravalEVm010813t2;Arachis_valida|AravalEVm010813t1
cluster1879	2	F4J394	GO:0007018; P:microtubule-based movement; IBA:GO_Central	Arachis_valida|AravalEVm002273t1;Arachis_valida|AravalEVm002273t2
cluster1880	2	Q9S7B5	GO:0009088; P:threonine biosynthetic process; IEA:UniProtKB-UniPathway	Arachis_valida|AravalEVm008666t1;Arachis_valida|AravalEVm008666t2
cluster1881	2	W6Q9S9	GO:0035835; P:indole alkaloid biosynthetic process; IEA:UniProtKB-UniPathway	Arachis_valida|AravalEVm022614t1;Arachis_valida|AravalEVm016509t1
cluster1882	2	N/A	N/A	Arachis_valida|AravalEVm001793t1;Arachis_valida|AravalEVm036313t1
cluster1883	2	P15625	GO:0006432; P:phenylalanyl-tRNA aminoacylation; IDA:SGD	Arachis_valida|AravalEVm009693t2;Arachis_valida|AravalEVm009782t1
cluster1884	2	Q4WF56	GO:0016787; F:hydrolase activity; IEA:UniProtKB-KW	Arachis_valida|AravalEVm022937t1;Arachis_valida|AravalEVm020694t2
cluster1885	2	N/A	N/A	Arachis_valida|AravalEVm069117t1;Arachis_valida|AravalEVm069117t2
cluster1886	2	Q6NMQ7	GO:0009744; P:response to sucrose; IEP:TAIR	Arachis_valida|AravalEVm075008t1;Arachis_valida|AravalEVm078271t1
cluster1887	2	N/A	N/A	Arachis_valida|AravalEVm059824t2;Arachis_valida|AravalEVm059824t1
cluster1888	2	Q6MZI7	GO:0045616; P:regulation of keratinocyte differentiation; IEA:Ensembl	Arachis_valida|AravalEVm000279t1;Arachis_valida|AravalEVm001342t1
cluster1889	2	Q7JQF1	GO:0042594; P:response to starvation; IMP:UniProtKB	Arachis_valida|AravalEVm023995t1;Arachis_valida|AravalEVm028755t1
cluster1890	2	Q9NR34	GO:0006487; P:protein N-linked glycosylation; TAS:UniProtKB	Arachis_valida|AravalEVm006913t1;Arachis_valida|AravalEVm009738t1
cluster1891	2	N/A	N/A	Arachis_valida|AravalEVm020756t1;Arachis_valida|AravalEVm017075t1
cluster1892	2	Q8LPQ6	GO:0005215; F:transporter activity; ISS:TAIR	Arachis_valida|AravalEVm003798t7;Arachis_valida|AravalEVm003798t6
cluster1893	2	Q2U5H8	GO:0055085; P:transmembrane transport; IEA:InterPro	Arachis_valida|AravalEVm010991t1;Arachis_valida|AravalEVm006255t1
cluster1894	2	Q8X167	GO:0042732; P:D-xylose metabolic process; IEA:UniProtKB-KW	Arachis_valida|AravalEVm006533t4;Arachis_valida|AravalEVm007772t2
cluster1895	2	O94708	GO:0005634; C:nucleus; HDA:PomBase	Arachis_valida|AravalEVm003509t1;Arachis_valida|AravalEVm003924t2
cluster1896	2	N/A	N/A	Arachis_valida|AravalEVm017743t1;Arachis_valida|AravalEVm017743t4
cluster1897	2	N/A	N/A	Arachis_valida|AravalEVm014976t2;Arachis_valida|AravalEVm014976t1
cluster1898	2	Q39962	GO:0005773; C:vacuole; IEA:UniProtKB-SubCell	Arachis_valida|AravalEVm038057t1;Arachis_valida|AravalEVm038057t2
cluster1899	2	Q9FJD5	GO:0009698; P:phenylpropanoid metabolic process; IMP:TAIR	Arachis_valida|AravalEVm007032t1;Arachis_valida|AravalEVm007063t1
cluster1900	2	Q83PR3	GO:0051287; F:NAD binding; IEA:InterPro	Arachis_valida|AravalEVm019981t2;Arachis_valida|AravalEVm024135t1
cluster1901	2	Q8VY10	GO:2000185; P:regulation of phosphate transmembrane transport; IGI:TAIR	Arachis_valida|AravalEVm001732t4;Arachis_valida|AravalEVm001796t1
cluster1902	2	N/A	N/A	Arachis_valida|AravalEVm025552t2;Arachis_valida|AravalEVm025552t5
cluster1903	2	N/A	N/A	Arachis_valida|AravalEVm003834t1;Arachis_valida|AravalEVm003834t2
cluster1904	2	Q5ABC5	GO:0016540; P:protein autoprocessing; IEA:UniProtKB-UniRule	Arachis_valida|AravalEVm008308t1;Arachis_valida|AravalEVm008544t1
cluster1905	2	Q4WX89	GO:0043565; F:sequence-specific DNA binding; IEA:InterPro	Arachis_valida|AravalEVm044069t1;Arachis_valida|AravalEVm053006t1
cluster1906	2	N/A	N/A	Arachis_valida|AravalEVm055569t1;Arachis_valida|AravalEVm062218t2
cluster1907	2	N/A	N/A	Arachis_valida|AravalEVm025694t1;Arachis_valida|AravalEVm027534t1
cluster1908	2	N/A	N/A	Arachis_valida|AravalEVm015845t1;Arachis_valida|AravalEVm015845t2
cluster1909	2	N/A	N/A	Arachis_valida|AravalEVm011481t2;Arachis_valida|AravalEVm029161t1
cluster1910	2	Q9HFR7	GO:0006412; P:translation; IEA:InterPro	Arachis_valida|AravalEVm079030t1;Arachis_valida|AravalEVm079030t2
cluster1911	2	N/A	N/A	Arachis_valida|AravalEVm034107t1;Arachis_valida|AravalEVm034107t2
cluster1912	2	N/A	N/A	Arachis_valida|AravalEVm015983t3;Arachis_valida|AravalEVm015983t5
cluster1913	2	Q6C6M5	GO:0045944; P:positive regulation of transcription by RNA polymerase II; IBA:GO_Central	Arachis_valida|AravalEVm034082t1;Arachis_valida|AravalEVm021909t4
cluster1914	2	N/A	N/A	Arachis_valida|AravalEVm015390t4;Arachis_valida|AravalEVm015390t3
cluster1915	2	Q9UW81	GO:0009416; P:response to light stimulus; NAS:UniProtKB	Arachis_valida|AravalEVm024811t1;Arachis_valida|AravalEVm025863t1
cluster1916	2	N/A	N/A	Arachis_valida|AravalEVm028684t1;Arachis_valida|AravalEVm018635t1
cluster1917	2	P41755	GO:0004352; F:glutamate dehydrogenase (NAD+) activity; IEA:UniProtKB-EC	Arachis_valida|AravalEVm054612t1;Arachis_valida|AravalEVm041290t1
cluster1918	2	Q7SGY1	GO:0070485; P:dehydro-D-arabinono-1,4-lactone biosynthetic process; IEA:EnsemblFungi	Arachis_valida|AravalEVm006900t1;Arachis_valida|AravalEVm009529t1
cluster1919	2	Q94F39	GO:0007165; P:signal transduction; IEA:InterPro	Arachis_valida|AravalEVm023575t2;Arachis_valida|AravalEVm023575t1
cluster1920	2	N/A	N/A	Arachis_valida|AravalEVm012779t2;Arachis_valida|AravalEVm012779t1
cluster1921	2	N/A	N/A	Arachis_valida|AravalEVm024598t1;Arachis_valida|AravalEVm026723t1
cluster1922	2	Q68FU3	GO:0033539; P:fatty acid beta-oxidation using acyl-CoA dehydrogenase; ISS:UniProtKB	Arachis_valida|AravalEVm036258t1;Arachis_valida|AravalEVm029678t1
cluster1923	2	Q8GW32	GO:0009416; P:response to light stimulus; IMP:TAIR	Arachis_valida|AravalEVm086322t2;Arachis_valida|AravalEVm086333t1
cluster1924	2	N/A	N/A	Arachis_valida|AravalEVm063230t1;Arachis_valida|AravalEVm058438t1
cluster1925	2	F4J7A7	GO:0015979; P:photosynthesis; IEA:InterPro	Arachis_valida|AravalEVm026503t1;Arachis_valida|AravalEVm026503t2
cluster1926	2	A2WWV5	GO:0005544; F:calcium-dependent phospholipid binding; IEA:UniProtKB-KW	Arachis_valida|AravalEVm052230t1;Arachis_valida|AravalEVm052230t2
cluster1927	2	O74933	GO:0006048; P:UDP-N-acetylglucosamine biosynthetic process; IEA:UniProtKB-UniPathway	Arachis_valida|AravalEVm010194t4;Arachis_valida|AravalEVm009821t1
cluster1928	2	O80477	GO:0009696; P:salicylic acid metabolic process; IBA:GO_Central	Arachis_valida|AravalEVm025825t1;Arachis_valida|AravalEVm025825t2
cluster1929	2	Q12230	GO:0009408; P:response to heat; IMP:SGD	Arachis_valida|AravalEVm024740t3;Arachis_valida|AravalEVm020775t1
cluster1930	2	Q09705	GO:0032543; P:mitochondrial translation; ISS:PomBase	Arachis_valida|AravalEVm016962t1;Arachis_valida|AravalEVm017185t1
cluster1931	2	Q9SYG4	GO:0006397; P:mRNA processing; IEA:UniProtKB-KW	Arachis_valida|AravalEVm007519t1;Arachis_valida|AravalEVm011645t1
cluster1932	2	Q03104	GO:0007131; P:reciprocal meiotic recombination; IMP:SGD	Arachis_valida|AravalEVm008313t2;Arachis_valida|AravalEVm009705t1
cluster1933	2	N/A	N/A	Arachis_valida|AravalEVm009048t2;Arachis_valida|AravalEVm009048t1
cluster1934	2	P32347	GO:0006782; P:protoporphyrinogen IX biosynthetic process; IEA:UniProtKB-UniPathway	Arachis_valida|AravalEVm016317t1;Arachis_valida|AravalEVm018871t2
cluster1935	2	P82195	GO:0006412; P:translation; IEA:InterPro	Arachis_valida|AravalEVm051636t5;Arachis_valida|AravalEVm051636t2
cluster1936	2	Q9VN12	GO:0006814; P:sodium ion transport; ISS:UniProtKB	Arachis_valida|AravalEVm010785t1;Arachis_valida|AravalEVm010128t1
[truncated: 2,044 more rows]

## Sheet: Table S16
cluster_name	protein_number	swiss_prot_id	go_annotation	protein_list
[truncated: 15 more rows]

[truncated: 1 more sheets: Table S17]
